# Supplementary material for: Torreya grandis oil attenuates cognitive impairment in scopolamine-induced mice
Source: Royal Society of Chemistry journal article supplement (doi:10.1039/d3fo03800a), 2023-01-01
Supplement: d3fo03800a3.pdf [file d3fo03800a3.pdf]

Figure 1

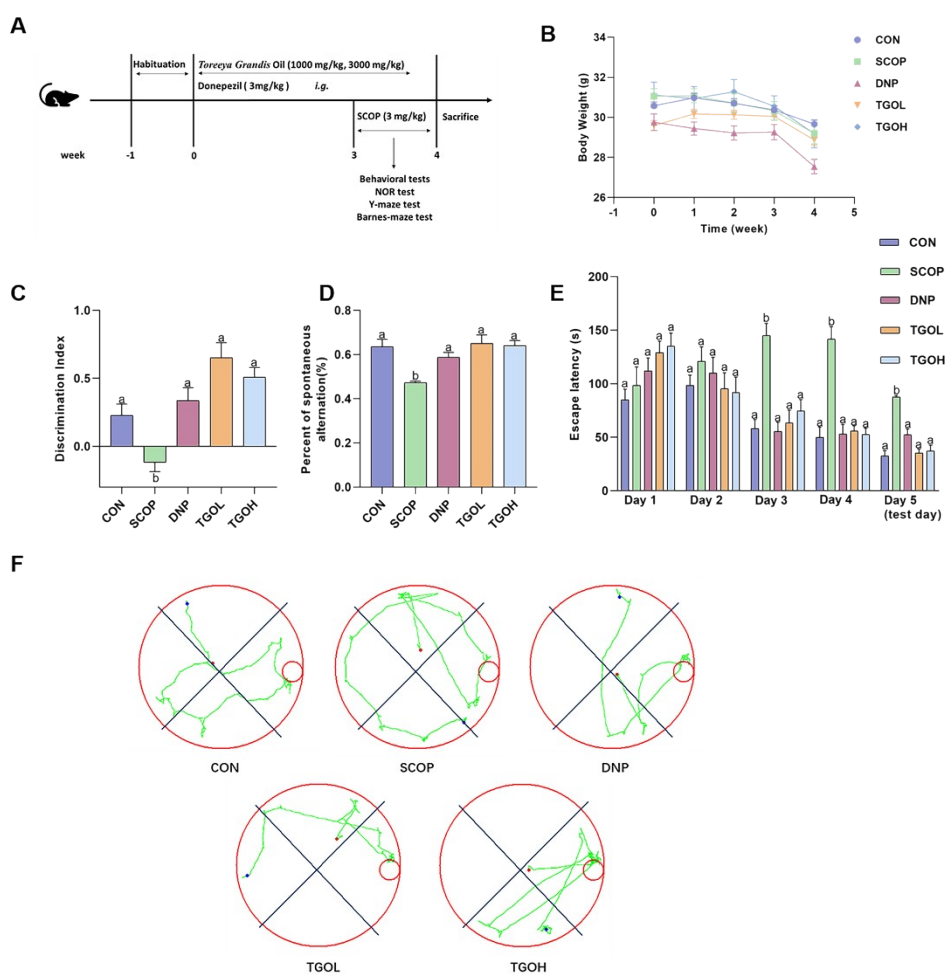

Figure 1B

| CON   | SCOP  | DNP   | TGOL  | TGOH  |
|-------|-------|-------|-------|-------|
| 31.98 | 32.83 | 27.66 | 29.13 | 35.27 |
| 30.45 | 29    | 32.53 | 28.31 | 24.88 |
| 31.1  | 32.47 | 29.97 | 29.03 | 33.31 |
| 29.22 | 30.91 | 32.42 | 28.45 | 27.66 |
| 30.79 | 28.83 | 29.55 | 29.67 | 33.89 |
| 30.76 | 32.05 | 29.6  | 30.09 | 31    |
| 29.22 | 32.02 | 27.34 | 28.55 | 27.35 |
| 29.66 | 27.3  | 28.37 | 31.11 | 31.75 |
| 30.5  | 32.5  | 32.82 | 32.45 | 33.41 |
| 32.11 | 32.63 | 27.32 | 29.18 | 32.62 |
| CON   | SCOP  | DNP   | TGOL  | TGOH  |
| 31.93 | 33.27 | 27.62 | 30.79 | 33.64 |
| 30.66 | 29.12 | 31.58 | 28.58 | 26.67 |
| 32.56 | 30.23 | 29.9  | 30.95 | 31.92 |
| 31.52 | 29.47 | 32.95 | 28.94 | 26.11 |
| 30    | 32.65 | 30.01 | 30.07 | 33.76 |
| 31.51 | 31.6  | 29.45 | 30.56 | 31.19 |

|       |       |        |       |       |
|-------|-------|--------|-------|-------|
| 28.28 | 27.71 | 27.73  | 29.36 | 26.56 |
| 30.47 | 32.16 | 28.1   | 30.61 | 32.49 |
| 31.27 | 32.14 | 28.85  | 32.62 | 33.98 |
| 31.58 | 32.4  | 28.27  | 29.19 | 32.98 |
| CON   | SCOP  | DNP    | TGOL  | TGOH  |
| 31.7  | 32.62 | 27.46  | 31.6  | 35.14 |
| 30.48 | 28.74 | 31.48  | 29.28 | 26.97 |
| 32.8  | 28.02 | 29.24  | 30.06 | 33.16 |
| 31.54 | 31.72 | 32.28  | 28.74 | 27.49 |
| 29.6  | 30.86 | 29.66  | 29.58 | 32.69 |
| 31.54 | 27.22 | 29     | 30.31 | 30.72 |
| 28.54 | 32.28 | 27.19  | 29.39 | 26.38 |
| 30.08 | 31.62 | 27.75  | 30.76 | 32.65 |
| 30.8  | 33.36 | 31.03  | 32.36 | 34.06 |
| 29.93 |       | 27.14  | 29.23 | 33.57 |
| CON   | SCOP  | DNP    | TGOL  | TGOH  |
| 30.16 | 31.79 | 27.45  | 29.64 | 34.2  |
| 32.16 | 28.3  | 31.39  | 29.12 | 27.2  |
| 32.09 | 27.6  | 29.78  | 31.46 | 32.27 |
| 31.36 | 31.06 | 32.49  | 29.1  | 27.48 |
| 29.38 | 30.85 | 29.24  | 29.39 | 30.95 |
| 29.38 | 26.65 | 29.39  | 30.35 | 29.5  |
| 29.78 | 32.21 | 26.49  | 29.22 | 26.41 |
| 29.23 | 32.05 | 28.03  | 31.09 | 32.27 |
| 30.4  | 32.4  | 31.29  | 31.74 | 32.76 |
| 29.75 |       | 27.099 | 29.38 | 32.56 |
| CON   | SCOP  | DNP    | TGOL  | TGOH  |
| 29.63 | 29.42 | 25.57  | 30.7  | 33.5  |
| 31.07 | 27.74 | 30.52  | 28.8  | 26.11 |
| 31.15 | 26.75 | 27.27  | 28.53 | 31.15 |
| 30.82 | 30.41 | 30.5   | 27.08 | 25.8  |
| 28.74 | 30.31 | 27.44  | 27.71 | 28.71 |
| 28.12 | 25.75 | 26.85  | 28.96 | 27.88 |
| 28.81 | 31.85 | 24.94  | 27.54 | 24.5  |
| 29.74 | 31.35 | 27.38  | 29.6  | 32.27 |
| 29.62 |       | 28.72  | 31.25 | 32.72 |
| 28.92 |       | 26.22  | 28.51 |       |

Figure 1C

| CON      | SCOP     | DNP      | TGOL     | TGOH     |
|----------|----------|----------|----------|----------|
| 0.2      | -0.33333 | 0.411765 | 1        | 0.333333 |
| 0.714286 | 0.037037 | 0.714286 | 1        | 0.272727 |
| 0.333333 | -0.33333 | 0.5      | 0.6      | 0.454545 |
| 0.333333 | -0.23077 | -0.2     | 0.684211 | 0.428571 |
| 0.5      | -0.24138 | 0.5      | 1        | 1        |

|          |          |          |          |       |
|----------|----------|----------|----------|-------|
| -0.17241 | 0.076923 | 0.241379 | 0.333333 | 0.5   |
| 0        | 0.142857 | 0.142857 | 0        | 0.6   |
| 0        | -0.06667 | 0        | 1        | 0.375 |
| 0.076923 |          | 0.354839 | 0.4      | 0.6   |
| 0.294118 |          | 0.714286 | 0.5      |       |

Figure 1D

| CON      | SCOP     | DNP      | TGOL     | TGOH     |
|----------|----------|----------|----------|----------|
| 0.588235 | 0.483871 | 0.617647 | 0.75     | 0.636364 |
| 0.545455 | 0.464286 | 0.538462 | 0.55     | 0.642857 |
| 0.636364 | 0.5      | 0.571429 | 0.714286 | 0.692308 |
| 0.645161 | 0.466667 | 0.611111 | 0.73913  | 0.529412 |
| 0.785714 | 0.454545 | 0.666667 | 0.592593 | 0.666667 |
| 0.611111 | 0.470588 | 0.52     | 0.555556 | 0.673913 |

Figure 1E

| Day 1    |          |    |
|----------|----------|----|
| 85.0608  | 9.945393 | 10 |
| 98.44563 | 17.29525 | 8  |
| 112.1011 | 11.86895 | 10 |
| 129.0742 | 10.80173 | 10 |
| 135.016  | 12.3165  | 9  |
| Day 2    |          |    |
| 98.5238  | 9.579628 | 10 |
| 120.9861 | 13.5533  | 8  |
| 109.9733 | 14.69179 | 10 |
| 95.3472  | 14.90156 | 10 |
| 91.94656 | 14.28669 | 9  |
| Day 3    |          |    |
| 58.2444  | 8.391558 | 10 |
| 145.0991 | 11.2993  | 8  |
| 55.5905  | 8.532511 | 10 |
| 63.3906  | 12.0635  | 10 |
| 74.85644 | 10.27825 | 9  |
| Day 4    |          |    |
| 50.1054  | 9.455746 | 10 |
| 141.723  | 11.63598 | 8  |
| 52.9106  | 9.230482 | 10 |
| 56.1258  | 4.626871 | 10 |
| 52.79344 | 5.757281 | 9  |
| Day 5    |          |    |
| 32.5988  | 4.878132 | 10 |

|          |          |    |
|----------|----------|----|
| 87.61275 | 1.579017 | 8  |
| 52.4499  | 5.464573 | 10 |
| 35.2737  | 3.767648 | 10 |
| 37.28589 | 5.505494 | 9  |

Figure 2

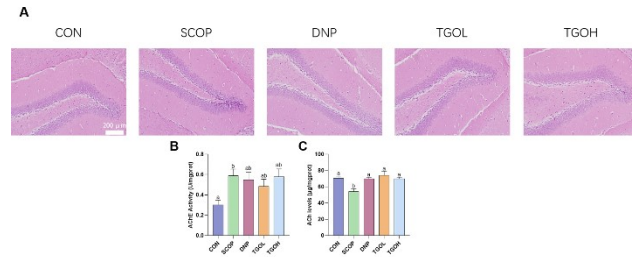

Figure 2B

| CON      | SCOP     | DNP      | TGOL     | TGOH     |
|----------|----------|----------|----------|----------|
| 0.196427 | 0.414984 | 0.735573 | 0.628569 | 0.287957 |
| 0.435933 | 0.660771 | 0.597989 | 0.425786 | 0.60158  |
| 0.280906 | 0.535252 | 0.656073 | 0.36212  | 0.716367 |
| 0.211488 | 0.7957   | 0.360558 | 0.675051 | 0.632082 |
| 0.381089 | 0.539621 | 0.392153 | 0.326    | 0.659189 |

Figure 2C

| CON      | SCOP     | DNP      | TGOL     |
|----------|----------|----------|----------|
| 79.49367 | 39.27067 | 76.69577 | 97.21519 |
| 76.96203 | 48.63017 | 74.88186 | 85.56962 |
| 73.92405 | 49.18044 | 71.29278 | 75.94937 |
| 72.40506 | 52.8763  | 67.8481  | 72.40506 |
| 66.14084 | 59.19084 | 66.83544 | 68.86076 |
| 62.92259 | 61.77215 | 66.83544 | 59.80551 |
| 61.26582 | 67.34177 | 65.31646 | 56.70886 |

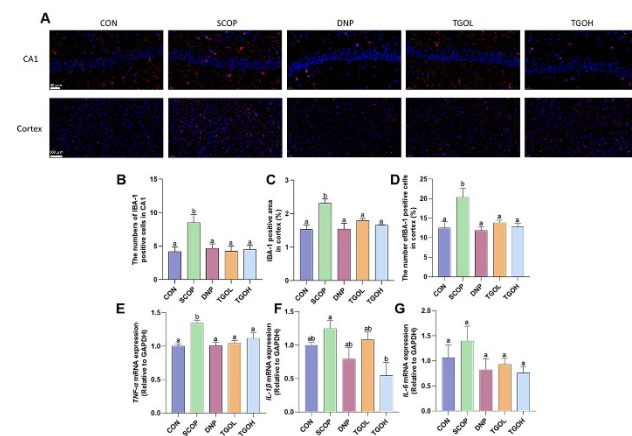

Figure 3B

| CON | SCOP | DNP | TGOL | TGOH |
|-----|------|-----|------|------|
| 3   | 7    | 6   | 6    | 4    |

|   |    |   |   |   |
|---|----|---|---|---|
| 4 | 12 | 7 | 3 | 2 |
| 4 | 8  | 3 | 3 | 6 |
| 5 | 7  | 5 | 5 | 5 |
| 2 |    | 3 |   | 6 |
| 7 |    | 4 |   | 4 |

Figure 3C

| CON   | SCOP  | DNP   | TGOL  | TGOH  |
|-------|-------|-------|-------|-------|
| 0.97  | 2.056 | 2.055 | 1.785 | 1.699 |
| 1.341 | 2.385 | 1.485 | 1.561 | 1.699 |
| 1.519 | 2.198 | 0.981 | 1.864 | 1.656 |
| 1.689 | 2.154 | 1.655 | 1.811 | 1.618 |
| 1.928 | 2.043 | 1.534 | 1.944 | 1.596 |
| 1.728 | 3.02  |       |       |       |
|       | 2.325 |       |       |       |

Figure 3D

| CON | SCOP | DNP | TGOL | TGOH |
|-----|------|-----|------|------|
| 10  | 19   | 14  | 13   | 12   |
| 12  | 24   | 12  | 17   | 15   |
| 10  | 14   | 12  | 14   | 14   |
| 20  | 17   | 9   | 13   | 10   |
| 14  | 18   | 9   | 13   | 13   |
| 9   | 30   | 15  | 13   |      |

Figure 3E

| CON          | SCOP         | DNP          | TGOL         | TGOH         |
|--------------|--------------|--------------|--------------|--------------|
| 1.0351460285 | 1.4051673802 | 0.9327171543 | 1.1257088301 | 1.009941909  |
| 0.9019099826 | 1.2523390531 | 1.112145508  | 1.024747792  | 1.0499975896 |
| 1.0649551245 | 1.3686409918 | 0.9716614942 | 0.9754353258 | 1.2921510043 |
| 0.9979888645 |              |              |              |              |

Figure 3F

| CON          | SCOP         | DNP          | TGOL         | TGOH         |
|--------------|--------------|--------------|--------------|--------------|
| 1.0613166816 | 1.3138422311 | 0.2848618418 | 0.7916203231 | 0.157419614  |
| 0.9153630596 | 1.008591415  | 0.9754374249 | 1.3595494962 | 0.7926847978 |
| 1.0155468392 | 1.4132207183 | 1.0497902397 | 1.1337830724 | 0.687406029  |
|              |              | 0.853072128  | 1.0404888343 |              |

Figure 3G

| CON          | SCOP         | DNP          | TGOL         | TGOH         |
|--------------|--------------|--------------|--------------|--------------|
| 1.5694544095 | 1.7846229945 | 0.7568788029 | 1.2409079916 | 0.7303902626 |
| 0.7333381395 | 0.8115602829 | 1.2314309875 | 0.9941540973 | 0.8769001989 |
| 0.8870255876 | 1.5905803902 | 0.4785050673 | 0.7223528655 | 1.0081551309 |
|              |              |              | 0.7528811715 | 0.4330058944 |

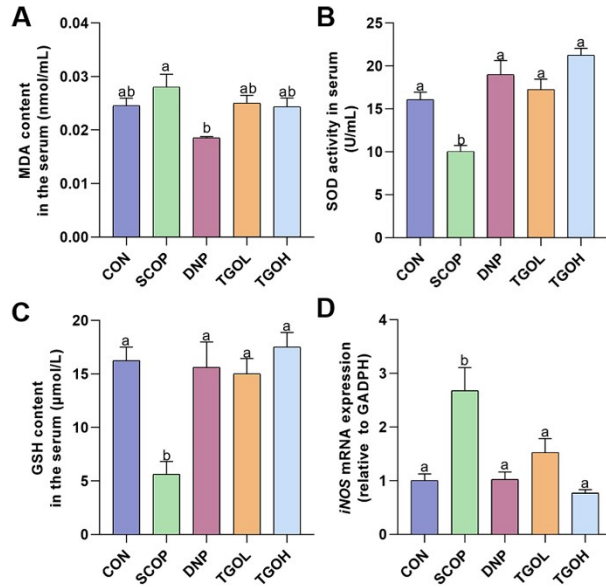

Figure 4A

| CON   | SCOP  | DNP   | TGOL  | TGOH  |
|-------|-------|-------|-------|-------|
| 0.027 | 0.024 | 0.019 | 0.029 | 0.026 |
| 0.027 | 0.026 | 0.019 | 0.025 | 0.026 |
| 0.022 | 0.027 | 0.018 | 0.024 | 0.021 |
| 0.022 | 0.035 | 0.018 | 0.022 |       |

Figure 4B

| CON      | SCOP     | DNP      | TGOL     | TGOH     |
|----------|----------|----------|----------|----------|
| 17.5651  | 7.938072 | 21.61858 | 19.99719 | 22.42928 |
| 15.43702 | 7.634061 | 10.37016 | 21.06122 | 22.17593 |
| 13.41027 | 11.33286 | 18.93315 | 15.53835 | 14.67699 |
| 18.47713 | 11.48487 | 16.14638 | 12.65025 | 22.37861 |
| 15.43702 | 10.6235  | 22.32794 | 15.18367 | 22.2266  |
|          | 11.13019 | 21.82125 | 14.32231 | 22.12526 |
|          |          | 21.61858 | 22.47994 | 21.16256 |
|          |          |          | 13.41027 | 21.66925 |
|          |          |          | 20.4532  | 22.17593 |

Figure 4C

| CON | SCOP | DNP  | TGOL | TGOH |
|-----|------|------|------|------|
| 20  | 7.5  | 15   | 17.5 | 15   |
| 15  | 2.5  | 22.5 | 12.5 | 22.5 |
| 15  | 5    | 12.5 | 12.5 | 17.5 |
| 15  | 7.5  | 12.5 | 17.5 | 15   |
|     |      |      |      | 17.5 |

Figure 4D

| CON          | SCOP         | DNP          | TGOL         | TGOH         |
|--------------|--------------|--------------|--------------|--------------|
| 0.8864114324 | 2.0350063968 | 0.889733975  | 1.8437230971 | 0.6429217488 |
| 1.2511514123 | 2.5162622833 | 1.3004936035 | 1.7232833071 | 0.8155940303 |







c . . . . .  
o 6 5 5 6 6 5 5 5 6 6 6 5 0 5 5 6 5 6 6 5 6 6 6 6 5 6 6 5 5 5 5 5 6 5  
p 2 7 6 3 1 0 5 4 4 0 1 1 0 3 4 4 7 4 0 7 4 2 4 5 9 0 2 9 7 7 4 5 2 8

—  
6

S

c

o 0 0 0 0 0 0 0 0 0 0 0 0 0 0 0 0 0 0 0 0 0 0 0 0 0 0 0 0 0 0 0 0

p . . . . .

— 6 5 5 6 6 5 5 5 6 6 5 5 5 0 4 6 6 6 5 5 6 5 5 6 6 5 5 5 5 5 5 5 5  
7 0 7 3 3 3 4 7 7 3 2 9 2 3 0 2 0 0 1 9 4 0 7 9 1 0 7 9 5 9 3 3 3 8 7

S

c

o 0 0 0 0 0 0 0 0 0 0 0 0 0 0 0 0 0 0 0 0 0 0 0 0 0 0 0 0 0 0 0 0

p . . . . .

— 5 5 5 6 6 5 5 5 6 6 5 5 5 4 0 6 5 6 6 5 6 5 6 6 6 5 6 6 5 5 5 4 5 6  
8 8 5 5 1 1 6 8 7 3 2 8 3 4 2 0 1 9 3 0 4 2 8 1 1 0 8 0 0 8 4 3 9 7 0

T

G

O 0 0 0 0 0 0 0 0 0 0 0 0 0 0 0 0 0 0 0 0 0 0 0 0 0 0 0 0 0 0 0 0

H . . . . .

— 6 6 6 6 6 6 6 6 6 6 6 6 6 6 0 5 5 5 5 5 5 5 5 6 5 6 5 5 6 5 5 5 5  
1 4 0 0 4 3 3 3 2 0 2 1 1 4 0 1 0 3 6 3 5 6 3 7 8 2 5 0 9 7 1 6 8 4 7

T

G

O 0 0 0 0 0 0 0 0 0 0 0 0 0 0 0 0 0 0 0 0 0 0 0 0 0 0 0 0 0 0 0 0

H . . . . .

— 6 6 5 6 6 5 6 6 6 6 6 5 5 6 5 5 0 5 5 5 5 5 6 6 6 5 6 5 5 5 5 5 5  
2 3 2 9 1 3 9 0 1 2 1 3 9 7 0 9 3 0 4 1 3 5 4 0 3 2 6 1 8 6 8 6 6 6 6

T

G

O 0 0 0 0 0 0 0 0 0 0 0 0 0 0 0 0 0 0 0 0 0 0 0 0 0 0 0 0 0 0 0 0

H . . . . .

— 6 6 6 6 6 6 5 6 6 6 6 6 6 6 5 5 0 5 5 5 5 5 6 6 5 5 6 5 5 5 5 5 6  
3 3 4 3 1 2 0 8 0 1 2 3 0 4 1 3 6 4 0 2 7 8 7 6 1 5 3 9 0 8 9 9 9 5 1

T

G

O 0 0 0 0 0 0 0 0 0 0 0 0 0 0 0 0 0 0 0 0 0 0 0 0 0 0 0 0 0 0 0 0

H . . . . .

— 6 6 5 5 5 5 5 5 6 5 6 5 6 5 6 5 5 0 5 5 5 5 6 6 5 5 5 5 5 5 5 5  
4 0 1 9 9 9 9 6 7 0 9 2 5 0 9 0 3 1 2 0 6 6 2 9 0 2 5 9 6 5 7 3 6 5 4

T 0 0 0 0 0 0 0 0 0 0 0 0 0 0 0 0 0 0 0 0 0 0 0 0 0 0 0 0 0 0 0 0

G . . . . .

O 6 6 5 6 6 6 6 5 6 6 6 6 5 5 5 5 5 0 5 4 5 5 5 5 5 5 5 5 5 4 5 5







|                                   |      |       |       |      |
|-----------------------------------|------|-------|-------|------|
| b51fd7c2597740d60a31803d670a023d  | 287  | 1435  | 13    | 10   |
| fd81d17e4f1689f2fce8f60d3ea6e66c  | 1371 | 2152  | 2461  | 7059 |
| 7a32a8fb995abf3992ce60914ff8dd43  | 3015 | 11287 | 983   | 0    |
| 9f777d99c764a7996e9804cdcc2d1add  | 170  | 1005  | 11994 | 1260 |
| 562b9f19428a046eb17af56791880718  | 13   | 0     | 9373  | 847  |
| c573e8aa09ce5ea9dfcae75e3ba17c86  | 1843 | 3368  | 8382  | 733  |
| 569ae6e38a27aec08a0934f22784dbc3  | 1410 | 3605  | 2261  | 3059 |
| 41f63e02cc199fe7ce28894304118a9f  | 2499 | 1995  | 3637  | 2623 |
| 337b4e7664d17686d7d4700807b2d66f  | 2305 | 895   | 6848  | 2170 |
| 31795f798ef50fa8316c8168bd165d09  | 1116 | 260   | 968   | 7074 |
| a24b6e0996b9fbaa38610559ac923a17  | 841  | 417   | 1991  | 7599 |
| a2b48cc2faf915571fda275fbb7a404e  | 819  | 2451  | 1532  | 1222 |
| 7b88477bcf6b9072c9e7ce1345c27638  | 334  | 1195  | 2581  | 0    |
| 2786a3936afe203732ef84ecfbf42f7b  | 834  | 1150  | 4235  | 3672 |
| 6f1c70b6d9e037711c028629ca233185  | 2538 | 3011  | 2253  | 2907 |
| d53f2eb27a667095f7100d5bd72979b9  | 2415 | 3570  | 1007  | 3709 |
| 036ba5a2be0c77a6446672d09f7d8feb  | 584  | 2073  | 281   | 7569 |
| a61360801e1f86b42c1570681c366d48  | 966  | 2313  | 1727  | 731  |
| e7b2c24c5f0d48a0677e3bc80d3e000d  | 834  | 2023  | 1978  | 1387 |
| 4101ed0e2b7295fe05e3bd089901fb21  | 146  | 19    | 7483  | 2377 |
| 1091f45bf82638a19fffc03fd9790390f | 685  | 1044  | 3793  | 3310 |
| 2bb35e866b761863eeebcd64ddffc947  | 307  | 295   | 9366  | 70   |
| 00b8914f01b0c6a32672da52af712059  | 2880 | 1129  | 1265  | 2542 |
| a002c73cdb874ca7e06c36351e991866  | 534  | 2190  | 1721  | 2139 |
| a1d51359256f94e7b95dacc7b4129453  | 9    | 239   | 6852  | 2456 |
| 7df0de1fc0962db165f1a87b79ed0af6  | 1284 | 1178  | 3514  | 671  |
| 2c712185aa1393c5337effc878d40775  | 432  | 1140  | 144   | 370  |
| 7314e09006c7be4a1120840e278f26e0  | 269  | 860   | 668   | 630  |
| 31255586fe415c688e5a9ae0314c988   | 1199 | 1613  | 780   | 1990 |
| 0a7909baf81962e17f5c8ab41c4f31c2  | 203  | 366   | 5358  | 2180 |
| e4fe27ac6bc30f5f0eeafb355861817a  | 2578 | 1383  | 2282  | 902  |
| 8d4c73fc9277a090add2539a3c8a904c  | 1556 | 1655  | 752   | 3351 |
| 2d2a2eada828b71bdf9cbb11982ce24a  | 1555 | 1212  | 3846  | 250  |
| 878fd5ad92e2f7bea2881e6df1f9bdda  | 1128 | 2108  | 2527  | 1992 |
| 05e70cf3a9722e2d46abca4a1f686c27  | 1878 | 910   | 58    | 909  |
| 432779b7a7d8389f9417f084463129d1  | 830  | 408   | 1373  | 2710 |
| 9d668f96a2dbd0f107a7e3801cc6c6ab  | 1035 | 1329  | 1777  | 2694 |
| 47e1cd99205041c61f09de66e116df81  | 3568 | 1563  | 57    | 126  |
| edc8ab3009a07d3f58561210564aa3b6  | 0    | 0     | 4413  | 379  |
| a7b103f56402bb482fe9e00222dc0427  | 0    | 2648  | 0     | 15   |
| 7126929edc923ad7f62448a53d72fa45  | 1502 | 1327  | 1515  | 1346 |
| f22ac668c0ec4fa1aa4119045d3bf6b4  | 2794 | 3310  | 0     | 114  |
| fe7328e2412c7098575d951097b9bc41  | 1489 | 476   | 1863  | 819  |
| 6ca1326d225d72bba74fb6f0087ea590  | 938  | 570   | 1430  | 2181 |

|                                   |      |      |      |      |
|-----------------------------------|------|------|------|------|
| ac7662568b7632d0dcc654615623c864  | 1173 | 2097 | 730  | 567  |
| 199c5df50e3db996690096ff3df73d7a  | 414  | 2557 | 0    | 0    |
| 60feff4d1108323130a4dbab8e031530  | 75   | 0    | 4214 | 1407 |
| 78362a01257961d11d833e094d18c18f  | 0    | 1272 | 518  | 941  |
| 734a07c50f74a357f859a1271505da52  | 46   | 2634 | 526  | 1678 |
| 4308d51163179c10e61c67837e9a53f8  | 466  | 727  | 910  | 1526 |
| eb35d78328f83f203c1174287c2c9a0f  | 1115 | 1109 | 70   | 182  |
| b7563644fdabedd89b31cac9c326f9f7  | 1023 | 1853 | 747  | 749  |
| ffcf791ac7fc2e278c21da4662ca1bbd  | 103  | 1389 | 2254 | 1108 |
| 5f737504acc11df6ccda56eee6a5abbbf | 3506 | 1093 | 392  | 51   |
| 5a800283d5784eded9bc28e4ef87d9f6  | 1089 | 885  | 1101 | 1077 |
| 9fdf9ac072b0667aa01448a9dac0ae6b  | 102  | 613  | 65   | 2871 |
| 620d9972b8f99e8ca94183e2023fb7b8  | 130  | 2401 | 629  | 1304 |
| b6ce5d74291f45a13c26473b3cfd72cc  | 1552 | 928  | 1233 | 422  |
| 0799dcf0a4d8fd119a29e3399585e23d  | 1476 | 797  | 1326 | 577  |
| f591209e26d27536bac8dd1c1528725d  | 273  | 231  | 1950 | 1998 |
| 891d35abe4e6aa48cac8068acdfa1944  | 494  | 616  | 740  | 433  |
| fdc1bfd04b316ad296381ebd28405bf4  | 776  | 1237 | 989  | 816  |
| 4736eb467d1d9ac3c2320d39b4eb983d  | 1220 | 933  | 1044 | 772  |
| da539626cd0a5a5d76493dfd01120eb8  | 120  | 127  | 704  | 3525 |
| 2187808f8f3c2b42d8c22d0bd3ea34df  | 903  | 460  | 449  | 698  |
| 14f378d04c41e2562999e531dc676d75  | 277  | 502  | 1656 | 1580 |
| 88c28ef5a9d7cf0be023916e17c78ef5  | 788  | 1491 | 610  | 728  |
| 46189723f5bf9a5f3c4371645544bd7e  | 34   | 2326 | 390  | 1316 |
| 2d38fbf722df122cc2b19668a5644d7d  | 1162 | 1641 | 1501 | 129  |
| 541aebf40b914acc51ca95bcbf5f9d07  | 106  | 159  | 1825 | 1399 |
| 08954f2de2c8ca3ddcd72a476c880576  | 1309 | 596  | 625  | 247  |
| c8d2c34032244f375a5461eee721a54c  | 617  | 942  | 1713 | 617  |
| 7d1ba5fd09f05e0204769051f55956c8  | 1351 | 1500 | 323  | 721  |
| f3ce52c9f11174a032abf4d2d52e4bf6  | 360  | 337  | 2141 | 284  |
| c933c939a41ae7479c131a84400c1992  | 931  | 306  | 235  | 2008 |
| 24da6c3b4969ea2a396f3d97bd0798dd  | 1310 | 870  | 736  | 569  |
| 9e600a723d1b9216a510fe8ebb728391  | 730  | 572  | 1114 | 1148 |
| 99a580b80b265bcb92a719943bc417d6  | 687  | 1311 | 491  | 736  |
| b4e0adb2112585c9c061ac5cee007d52  | 626  | 1293 | 128  | 196  |
| 6e731579ea447a1701ba6edc3adb723a  | 447  | 956  | 1629 | 709  |
| 788b3f6fce8d03f3d2db41b588f52b58  | 677  | 1219 | 560  | 659  |
| 74cf963baa99c52fdf123fa244387846  | 1823 | 932  | 0    | 988  |
| 335f0b906072d7a73f42cffc780a3412  | 386  | 840  | 1565 | 926  |
| d95190d225319f333a1044faf0c8e5b8  | 82   | 0    | 2743 | 917  |
| 8c160916bba9a860adec0e3b1185330e  | 1174 | 676  | 653  | 985  |
| 3a9ae0fe7da1cd0ddc70785ad815c717  | 704  | 1436 | 73   | 592  |
| 9d74ace509cb12522dfef0379ba9928e  | 1352 | 1123 | 578  | 302  |
| f3ecc9d67fd511c88874443580ea6b8e  | 1612 | 297  | 397  | 0    |

|                                   |      |      |      |      |
|-----------------------------------|------|------|------|------|
| ff8c341eea6b9fca02122ec822d78834  | 537  | 1229 | 479  | 620  |
| a065f9ea6394def1f14ca5f63edb98d77 | 905  | 787  | 788  | 573  |
| 57faed173b89a89183f8c94d0d21b888  | 2691 | 510  | 0    | 0    |
| 7e025c475f1a940b8e9bfac5ac51e4dc  | 391  | 854  | 867  | 977  |
| a1c1ada766e890f911fa14b2e417844a  | 960  | 152  | 1282 | 46   |
| 7db39962ec588c019d6f30f5945efa7e  | 26   | 301  | 837  | 905  |
| 700859d9cf7df41d64c35d4e627b2076  | 2470 | 287  | 188  | 250  |
| c963556b5f022449d0c0c5a5bfbe1891  | 680  | 1177 | 930  | 195  |
| 35b1f4ff9ac811d5e75f4423e0bf203e  | 987  | 345  | 464  | 530  |
| 257ed70872e60e627052413016c1ba95  | 61   | 248  | 0    | 875  |
| cce3f5457d1811581ed7b24f64b2e7b0  | 0    | 920  | 0    | 718  |
| 624f6e5d5916a5cbfe033d04372f115d  | 1743 | 971  | 341  | 0    |
| b64e5f77de11e1612bb623944e01b3b8  | 318  | 1168 | 345  | 824  |
| b352fdf358f88c5b6ddc83e6fb5b77d1  | 376  | 1417 | 373  | 0    |
| 898ff8589020a0cf6f8d4b98c7e08481  | 159  | 1008 | 452  | 596  |
| a439423b24e5643122503643f7f22c5b  | 1460 | 511  | 0    | 0    |
| f82c31bad94040f1b781de1e7647f178  | 0    | 356  | 189  | 655  |
| 95b71f81133a5f0b46d9658ec5c2c997  | 428  | 677  | 689  | 117  |
| a5cb8a00e9f5225dbc91700a451d86f4  | 550  | 418  | 27   | 904  |
| 06845950cb839ada518fc1bf8717aa04  | 670  | 1329 | 29   | 10   |
| f64cafb46d13d8e5825677d185fa1d7e  | 600  | 899  | 384  | 537  |
| 97d1e195bc05eda9ace0317907795019  | 500  | 459  | 445  | 917  |
| 3520c815646e0253ca92da98f85899e5  | 0    | 0    | 1675 | 793  |
| 77099473d0cda3e8462d80d459f5e836  | 318  | 155  | 0    | 699  |
| 9e20a235c547acc52759d1b7c6e32662  | 336  | 713  | 751  | 552  |
| 9991030520fcf8ad16fda244f5d0c039  | 288  | 545  | 343  | 540  |
| 513014dc6ab3274c754d1c9d0257b3b7  | 0    | 0    | 1527 | 114  |
| 68d91efd23bd572a2596634c5e1a2a90  | 814  | 781  | 363  | 315  |
| dd86c00f9733c41b03e66a73c935f930  | 218  | 535  | 756  | 875  |
| d0f9f5132ecd309863e6a494abc6fed9  | 1277 | 221  | 262  | 152  |
| 52e5699c94de102da70ae27e4ce69996  | 997  | 650  | 113  | 350  |
| df6fc4b4a8026b83b2c276f332fd50cf  | 744  | 986  | 660  | 0    |
| ecd6a87484953d8d0474304a8af93661  | 337  | 73   | 523  | 561  |
| 26d2289c9980139c2f3342a8904991a2  | 57   | 223  | 808  | 579  |
| bb5dcd4d9227258108251a24e68f657c  | 27   | 259  | 1217 | 767  |
| bf1a08d3c50c290f038d68546e93cd34  | 0    | 27   | 665  | 1234 |
| 8ed34ad7163662a1f344630415d2815c  | 431  | 374  | 71   | 1036 |
| f436d2c484d1594065026f607af2f5e1  | 676  | 300  | 133  | 651  |
| ce43b8f29df7c9779edd60674305a215  | 940  | 265  | 30   | 0    |
| a3dc95c4b04e432cf27c83729f707ea5  | 1448 | 162  | 168  | 28   |
| f69045904699eefc4f5f8b0c3f809d7e  | 413  | 730  | 277  | 31   |
| 22b01a3688c70b585d88bef10be4fc41  | 150  | 209  | 767  | 312  |
| f895a7d12f7f1ca0d2415281cb98ad44  | 0    | 10   | 909  | 377  |
| d284d92ad14a530fd02f22286b134594  | 0    | 0    | 1656 | 439  |

|                                  |      |     |      |     |
|----------------------------------|------|-----|------|-----|
| 2f95cbdf3576f8c3976fa70bdd951975 | 261  | 109 | 91   | 393 |
| 5c9c1d93f695f0a51d298c9b67bf12a9 | 266  | 211 | 436  | 805 |
| fc09aae0332019d4c733aeaffb3ab07  | 492  | 424 | 344  | 157 |
| 6f602a19d82c8cd75af44fd809e32065 | 25   | 101 | 875  | 717 |
| 7cbb77f56ac4a9a827041276105a8024 | 637  | 206 | 393  | 470 |
| 58df8527a14018a8ff16b6d05faecfa7 | 482  | 751 | 275  | 121 |
| b85a62cea41081b122b7aaea932eca6a | 145  | 858 | 0    | 0   |
| e2460a512bae71d7569f16df86c985ba | 0    | 696 | 0    | 0   |
| 039a6b77bd8a63d56c55ab0e3392d142 | 787  | 957 | 0    | 0   |
| d7e319b96ffe22ed3c3de4fbb6cbb843 | 907  | 217 | 366  | 122 |
| bf4cad7782422a28944bbd2fda9c0a74 | 179  | 326 | 321  | 519 |
| 4f136c704b5dc9ca058789e408a43cbe | 33   | 556 | 450  | 620 |
| cb1e0d071f55234456c773ba3c60b18d | 241  | 416 | 289  | 414 |
| 6e0e41d8b69fded2ba5eaeff0bcad870 | 438  | 391 | 274  | 271 |
| 477b13c202efc08f3d4523cc236f7676 | 259  | 101 | 262  | 925 |
| 0dc0f37c198ea47125d1cab168a7b0ba | 383  | 466 | 111  | 853 |
| ec4f30dcba847a8a604069a3bd845a6f | 0    | 3   | 839  | 691 |
| b41d90a549f674d1d4213305030ec008 | 267  | 171 | 410  | 682 |
| 3edbd28880be18f8201cad60d32d3ae4 | 399  | 295 | 394  | 425 |
| c131cda46f8601b749ded9d6b408970a | 927  | 233 | 433  | 178 |
| f144b4c3d67d97b9171ee3e3b3aa5cc8 | 295  | 93  | 306  | 853 |
| cf64002ea680068cfd84aba630f20fca | 87   | 297 | 168  | 630 |
| 6cde45145eeb5fe7f963f923dd616183 | 158  | 510 | 546  | 355 |
| 7ae96d50cca515075a2e5c4c0e97333b | 313  | 0   | 1149 | 306 |
| 48edc81ba94a1f70db4dae200ef4b040 | 54   | 150 | 1448 | 105 |
| a6e86a7d10bceb14b1e3cd2ce343cd64 | 115  | 313 | 485  | 267 |
| 86c391136712b9d9723116591e35ed33 | 110  | 407 | 230  | 515 |
| 0e8f7db4449eb4d45ed98931888b76ef | 400  | 433 | 338  | 291 |
| 3b58bd8f1b604966afd774d2d4630bb9 | 135  | 44  | 127  | 967 |
| 61514b83191868908927724e8c0c87c0 | 0    | 440 | 472  | 466 |
| 0d97f3619ddc3c4e2a8aec298172acfe | 235  | 303 | 201  | 523 |
| f5f3c968d713328d224d18e0ef03997c | 286  | 30  | 399  | 111 |
| 87677f60ffb73d4c0108421565ba3a13 | 399  | 352 | 275  | 365 |
| 308131c08d42c3c1c21d1934c2aa76d2 | 28   | 0   | 1205 | 316 |
| bdbc6f5d008218b17f769a403c7671f5 | 231  | 90  | 47   | 939 |
| 4ed8670f4520b9c8beb901a8015ca59e | 859  | 269 | 45   | 78  |
| d14318e6160bd097fe267da957e471ba | 1238 | 124 | 55   | 89  |
| f195d5929ded89963806b7b93ad797f7 | 92   | 201 | 230  | 454 |
| db5083fb7a9c2edf1956b52b73a8edda | 368  | 183 | 289  | 210 |
| cbf8dafc9def7ebc98da8f059ed5c1c8 | 122  | 73  | 189  | 782 |
| ca6440ab9998c051357211527ba0c0b1 | 804  | 78  | 30   | 234 |
| d5b9e0b5af6656bc21dce2127cbc83a9 | 483  | 516 | 161  | 248 |
| 62fe77e96573a0d08f46edd1602ee4a3 | 113  | 103 | 197  | 632 |
| f9cae6bf5dcb794500ab94c4588bcfc8 | 493  | 222 | 71   | 651 |



|                                  |     |      |      |     |
|----------------------------------|-----|------|------|-----|
| 0dbb6ce06cee5d3d7ee7308d6366b8aa | 6   | 351  | 149  | 795 |
| a85a223585ef2d168a32c7cafb15f84d | 209 | 12   | 405  | 761 |
| 8ce111f6a6ed441e2b0fbe0b19c01ba9 | 101 | 70   | 934  | 91  |
| 73fbe9b778b095aa07b5c8f37ed24094 | 285 | 186  | 369  | 371 |
| a2860598f7a7433e10226aaa211f2707 | 163 | 616  | 37   | 48  |
| 98197d5d5ab056e6ba58ac826fbc46e6 | 505 | 130  | 446  | 128 |
| 2ef5b6d728ef0f32336d26f46d07167b | 193 | 162  | 242  | 337 |
| fd41e8815a28513e399f87edf5ef27e9 | 251 | 173  | 80   | 88  |
| 92f26f39aed46aa467d2d2f1c83f1934 | 21  | 99   | 336  | 317 |
| 1dd2bafef23f0b7757e6cfbfla4bce83 | 122 | 197  | 518  | 288 |
| ddb421f31380faf7e5512addbc159887 | 474 | 310  | 246  | 44  |
| e7d58be8110a163662964b21d8269b59 | 26  | 708  | 498  | 39  |
| 8714640e9a5bd16f33cd985711805a34 | 494 | 810  | 0    | 0   |
| 5cc600b5f4cdd6b20b04d45033d34190 | 563 | 285  | 325  | 0   |
| 29e38d2b9b4347c271aa8aee36d400a4 | 127 | 33   | 167  | 61  |
| ac389dbbc517b616042ad33f23a09289 | 679 | 68   | 41   | 0   |
| 4c31bf1e716a7fa1d04179b1bb89c401 | 178 | 358  | 56   | 141 |
| ee28fd4b0b520777d8e9eb4bc0448b63 | 93  | 0    | 0    | 297 |
| 504d734fc3eb4b39bfc335178c09cb2  | 306 | 392  | 79   | 322 |
| 9548ad2e5b899b04e043d8b4a5be0ee0 | 293 | 296  | 271  | 242 |
| a2753476742e63345a2fe8c116338fc9 | 239 | 109  | 563  | 227 |
| 85a756b35b503d5f4812e6b0c1faf9fc | 586 | 87   | 303  | 131 |
| e81728e297e5ecced36c2a092d7c4643 | 322 | 197  | 114  | 186 |
| 530ef4fd55fa18163494925875cc639a | 40  | 1047 | 126  | 36  |
| 36ad14a321e596b9e001c995060769a3 | 268 | 228  | 76   | 169 |
| 6beda361362fce56f2b64047a51ed8f2 | 33  | 104  | 226  | 17  |
| 693e843219d5f82dbe23cae86c193033 | 66  | 22   | 695  | 338 |
| 31870b3b5326b75e7647b8efad7b7a5c | 73  | 218  | 384  | 519 |
| 7466a937df6d1ebca43af6fc591da892 | 17  | 32   | 272  | 689 |
| 22afd816aa8a140b26a5a1598d30e496 | 520 | 334  | 279  | 17  |
| 1c355a47036cbd52e77efa1e71168854 | 0   | 34   | 1161 | 0   |
| 7fcd6eac3925dbc48d1fe6014442557f | 34  | 97   | 313  | 552 |
| 0f8dea6ab059baa16e65f49e913956bd | 447 | 486  | 150  | 54  |
| 020d038ed0e773d1e70653fcb1f87452 | 279 | 23   | 687  | 41  |
| 6ae0d25ba2cf27a7d0f6618211a6218e | 612 | 216  | 0    | 0   |
| 1de2f20cdb329619d8f71641faf493e1 | 0   | 0    | 1156 | 14  |
| f2f91e27abaf3092feb1bf10cf7de921 | 151 | 408  | 337  | 105 |
| 189abfbbe325aac75acb96dae68eeb4e | 522 | 140  | 0    | 0   |
| 2fdb6a5773cbc55fb1b3d50f38386c5f | 40  | 44   | 107  | 771 |
| 752d1e1fc2e91bac3f07b8d7012b115b | 123 | 89   | 258  | 507 |
| 951a4c9db2a6ed4931d80703f22ea7e8 | 443 | 51   | 56   | 551 |
| 65dfc71b908d1797f6e5fc0580d3a5ca | 213 | 328  | 124  | 4   |
| 5cb3309566f4369a9bf8b437ff7e85f0 | 52  | 141  | 386  | 276 |
| 899e0b167a3a030d675ef54fab4556d8 | 0   | 0    | 87   | 0   |

|                                  |     |     |     |     |
|----------------------------------|-----|-----|-----|-----|
| 796199a7f77714373f7549fe329bfc6  | 151 | 90  | 379 | 434 |
| 62d38ebf2152b96769f4a31fe4fdd8c3 | 548 | 58  | 0   | 0   |
| 3594893888d98c2baff34d27f6662cb3 | 115 | 304 | 0   | 0   |
| 01b87ed8227eedec9cafd2e7fb3b4c8e | 258 | 803 | 20  | 0   |
| f54da71ac36e400d0bb0a8c77bfb5a8  | 746 | 37  | 30  | 183 |
| a699d2f54caa2f7d4f7abfa43945125c | 0   | 0   | 604 | 0   |
| a03424441f6d0f80f8d6a04f85015c2c | 126 | 371 | 34  | 45  |
| f597837e32f63a74ab86222ed6cadd62 | 107 | 385 | 44  | 295 |
| 47b53210bc62338d4d9a945d26d6b481 | 74  | 32  | 192 | 509 |
| 1847470f9dd1f5dc0b402a6215147d07 | 511 | 97  | 29  | 332 |
| 425a76975806d8d953b46159ead27efc | 339 | 758 | 0   | 0   |
| aa9fabf8266e351aa801201e88817323 | 24  | 276 | 154 | 509 |
| 5c2237126ec7183a15dfc2151e803278 | 187 | 154 | 232 | 252 |
| dd04a0a5de41e1a376e6c41eedf6bbcf | 98  | 51  | 242 | 394 |
| 7ad524f4ccacf47d2c9ab920b5015a97 | 414 | 250 | 62  | 295 |
| 12642e6aaa8986e8500a302e87b3aa0f | 556 | 454 | 0   | 18  |
| a417cc2f0660a5f6fd2d43c2142e1bb1 | 312 | 313 | 85  | 235 |
| e7fab69e4a22619190f4967890686e76 | 120 | 797 | 0   | 0   |
| c19b805fc08efbefbec543732e9d9297 | 40  | 223 | 292 | 268 |
| e48ebb0f0119fe854a7d6049ccf53286 | 297 | 292 | 60  | 151 |
| 2f63f9f0dcf41cee937d88fd947426b1 | 79  | 50  | 186 | 533 |
| 2552405fc96469528e44cb8ec376518e | 36  | 237 | 319 | 140 |
| 65cb09f6d2989ddcb19b6ea2e7073468 | 138 | 140 | 127 | 563 |
| e3e618b6c0b173feb5ba627d9a96d485 | 281 | 726 | 0   | 0   |
| bffbe6a9327f107aee0f2bb01618cc6f | 12  | 65  | 76  | 0   |
| 503e4512cf8f4dbf0544f5330aced478 | 261 | 179 | 506 | 36  |
| ecf4791f87a92f5ea58fc8f754166a60 | 599 | 16  | 42  | 0   |
| 82b31d49fe2e9a132b2587e9b7ab4495 | 303 | 157 | 177 | 126 |
| 05c6a601e771eb672b996f778521f901 | 161 | 688 | 0   | 96  |
| 5f37d0126586615363ad082a27c40635 | 0   | 87  | 219 | 168 |
| ccadfb1cbfccf00cf5f9d03d6183bf18 | 444 | 3   | 23  | 38  |
| 02754ce2493d93426aecc0e76a9a366c | 15  | 154 | 440 | 59  |
| fb6e1b6014c1410ade4eac7ca234616e | 34  | 125 | 175 | 458 |
| ec2e61f9592b92574ad5adbfeddcfd04 | 122 | 310 | 182 | 287 |
| 0d4ae0fbaa07d21ae37d038a5ee2137a | 0   | 0   | 0   | 916 |
| 5cd20cebbb998c1d2de44cadac99c742 | 144 | 805 | 0   | 0   |
| cd67a5a5229053d5db9242576edc387e | 141 | 124 | 405 | 63  |
| eb2d3d6cf2ce45924ad25c5d26970974 | 311 | 81  | 129 | 270 |
| 9cc3223b2806b96e034c434480458942 | 0   | 943 | 0   | 0   |
| d2661050b08398f6732f416899b4e861 | 533 | 222 | 64  | 87  |
| f335c1e7bff5471be41106b0ab227ec8 | 69  | 67  | 119 | 574 |
| cf182aba2374971e7a6b64f09e9d7b81 | 70  | 0   | 250 | 601 |
| d6edd4a7f528e5711a600b46e73022bd | 2   | 125 | 79  | 61  |
| 853464988338a76f2ff0bd0720005800 | 0   | 0   | 0   | 0   |

|                                  |     |     |     |     |
|----------------------------------|-----|-----|-----|-----|
| 0b9238c94b6a999671e51587f0c2a475 | 187 | 320 | 215 | 131 |
| e8fbef94c26552f27e44638aa8aefa2  | 195 | 311 | 167 | 115 |
| 2bd9efc537f78c46be369a51f1a5ea4e | 32  | 50  | 587 | 130 |
| 7794d8f9446efa6ec04a8dedd2d5196f | 131 | 262 | 31  | 0   |
| 08e0971f6997633221d8a3f16b0546b2 | 138 | 260 | 141 | 135 |
| d2175771e519c04c2fac6833ac7b7533 | 44  | 35  | 224 | 69  |
| c2fcdba35d452a394515a2f31f66e8ad | 207 | 184 | 6   | 69  |
| dfd4be1efcb81d8f3fcbfddd2d54ffb1 | 151 | 55  | 125 | 286 |
| 0b6a0d37994c7e89463c26766c93dd31 | 220 | 44  | 36  | 433 |
| 484e7aa18f84f8e89bdc80a3e9a294ca | 786 | 0   | 0   | 34  |
| 94ba6fe47890aa4b4d8f5382870b2db5 | 0   | 0   | 270 | 563 |
| c888a542278908993914acc988421d9e | 87  | 93  | 97  | 0   |
| ca3c8356f9b1815927caba46ffd13063 | 71  | 361 | 15  | 23  |
| 27c8a1da9c47447535160e1177fb6e58 | 137 | 138 | 342 | 206 |
| 31eea30d3efdf5c88dac0f8ec3488870 | 294 | 139 | 88  | 249 |
| ab2c864cb4df4aa10ed532b95c2770c7 | 171 | 121 | 261 | 191 |
| 1e8217f3e6eaf0c02d08c57f0e8cced9 | 213 | 158 | 183 | 114 |
| 937ddad3da91cdb239dd6d793ed6bbc6 | 29  | 12  | 273 | 482 |
| 389fbcd230e513db0374cd11bb83221a | 163 | 6   | 23  | 554 |
| 9bbd264c9042fffbb9c2988d60739815 | 0   | 229 | 2   | 602 |
| aabdb0ee7a60d69cedb62ba6eb12c7a8 | 350 | 198 | 81  | 56  |
| bc13eba636b3d7edf316151e5d95f2b0 | 37  | 16  | 339 | 209 |
| da38936fb867d6f621fcda76d4d1633c | 209 | 556 | 0   | 0   |
| d82fcde439a2ffe2816fd895f3758afb | 0   | 36  | 529 | 236 |
| 62a374f672e2a0fb443be8ee0d068958 | 189 | 205 | 137 | 44  |
| b40e2ee20507d43a32b77be0ec45a72e | 476 | 0   | 75  | 16  |
| b99b9339392deef556d211b9bb2e1023 | 248 | 8   | 140 | 237 |
| ce15028784d5c23cac277c4876306996 | 295 | 187 | 55  | 208 |
| 262d9b1f51fd825b09659c4e1ce0b451 | 61  | 96  | 128 | 492 |
| fa137562f88976bcf1468d15804e4442 | 0   | 57  | 62  | 583 |
| 985a06f1f2f1be109a8ed429889e6c11 | 468 | 241 | 83  | 0   |
| df94575779bdde7793a70005d08c1597 | 185 | 314 | 42  | 0   |
| 19064c26cfe9f96f20b4ea358e247a7c | 105 | 136 | 160 | 226 |
| 53def2ba5f1dd29a93e1ccf055e218a  | 38  | 129 | 111 | 375 |
| 82a792262b0bcaa7d012970ea5b7f677 | 48  | 126 | 162 | 199 |
| 093d7847f33cda5d4783dbd3bf026a23 | 90  | 53  | 290 | 302 |
| f9331e329ff310ee4ff565ab55d5f563 | 0   | 67  | 536 | 36  |
| 5ec8c1c799b97862d27d1939e86cb023 | 176 | 117 | 82  | 257 |
| bbb22b30f996a34d983e72fbbb9fc7b7 | 116 | 0   | 211 | 123 |
| 203b1aa6145b36edd646a0cb76a253b4 | 158 | 13  | 169 | 236 |
| b54268acc705a5269c13124facab9c01 | 115 | 97  | 167 | 236 |
| bd24cb5c78c149cde27bd38f691f523b | 62  | 12  | 184 | 480 |
| cb05269995354f287a0d5b9a86cdd4a8 | 159 | 43  | 243 | 166 |
| 5e09343b7991a4bb11a5cffbf6120cbd | 351 | 107 | 152 | 73  |

|                                  |     |     |     |     |
|----------------------------------|-----|-----|-----|-----|
| e7ec3d2ba7949c863007bf50159671be | 36  | 21  | 411 | 224 |
| 81e744379a82e4d84fd45073ba89ecac | 231 | 38  | 187 | 0   |
| bedf1f108d8517585499533e05d0e845 | 96  | 52  | 255 | 134 |
| bb0356bb51b1ea5d64aaabcec1894365 | 0   | 89  | 0   | 0   |
| dde25cd0687e4a22a08181b293be379d | 69  | 234 | 25  | 0   |
| 1a1cae243eb71e00c9298130bb1e320c | 8   | 570 | 0   | 0   |
| 5b35df9bd40a2ea37261deaefd1b46   | 0   | 0   | 41  | 0   |
| 1eec0551dedb4c6bf58fb5b24fbacda9 | 96  | 203 | 84  | 248 |
| 2b31c0b939feec68e5aba50e240f1b20 | 116 | 237 | 120 | 180 |
| 5f6cae837a0343676ea87dbe0b9ab747 | 657 | 36  | 0   | 0   |
| f9979e1572b0472ab28372a6e445adf9 | 237 | 223 | 0   | 105 |
| 6b89619a69a9bf4f22f7be80f7602549 | 0   | 89  | 0   | 481 |
| 812b93690ba8d0013f178f65dfcc76e7 | 69  | 38  | 74  | 356 |
| cf4be655794d8e805fb54676cd613d08 | 166 | 65  | 109 | 114 |
| 5aa29ce483461bb3779a80083e4b4862 | 2   | 0   | 207 | 447 |
| 6a3590c5569f6d55b81644b6cc405395 | 7   | 44  | 40  | 500 |
| e3d3257e8da9b8c7c006cd10f2302878 | 123 | 55  | 55  | 153 |
| 0f679e91ab2fed575071da257e9f5c00 | 19  | 41  | 358 | 186 |
| 46ca078506bcf7ebd5f75bbec6d2a4e7 | 0   | 0   | 40  | 631 |
| 4dc71cef16df10dd2caf8f8ed30f81   | 0   | 48  | 81  | 447 |
| e374bae72fb28adbd40ec67d63da8232 | 0   | 46  | 0   | 149 |
| a9dbeca547e6c50c35ca26b0c325d2ec | 587 | 15  | 57  | 0   |
| 451c793d499ea13f6e76be75937541cf | 249 | 75  | 0   | 190 |
| 32724d0334b4dca9e236558bd7be7754 | 237 | 100 | 120 | 183 |
| ca972331b64ef36b26f389f50a6e8838 | 128 | 121 | 188 | 162 |
| 0808ec8f99f38eeb558e3dfed9e45885 | 0   | 23  | 487 | 115 |
| 0e36340cf41849de5a679a50885c975b | 129 | 169 | 51  | 154 |
| 40e9e60f78b1f9538d37f78e5f6062b6 | 0   | 0   | 268 | 326 |
| 864ffc97f279080a965bb0aa15592a3e | 316 | 45  | 86  | 0   |
| 6aa09df1f776fc561b3858aa72921b83 | 69  | 127 | 376 | 0   |
| 1bc30d9bc229c740fc402f36e26e418e | 0   | 0   | 34  | 605 |
| 2c5981221bc2d0d66e4d116f025c8a61 | 18  | 53  | 95  | 313 |
| 2350592383dd3b36714442c4d3c51d62 | 0   | 317 | 34  | 2   |
| 852966c417ce1efbb078048f769f7393 | 154 | 93  | 121 | 242 |
| 68444bbc1b4f9c28bbf2a363c67ac8a7 | 32  | 31  | 26  | 450 |
| 030d73bf6756512a092e1c687922c08e | 65  | 85  | 245 | 56  |
| 79d88d16b5ebe12b0db18a41ac00101d | 51  | 83  | 96  | 351 |
| ae92751ce0103cf1fe77dd7f219da00c | 222 | 216 | 23  | 10  |
| cc1b2e6096db2c7aac77922f436b9662 | 0   | 0   | 230 | 389 |
| 15a8a885864bd8c25734344145b5fb17 | 189 | 280 | 148 | 0   |
| e8622d6b14406de3007be50ad6a88c78 | 212 | 332 | 71  | 0   |
| 16e4b614f72ad99deac616670ff11797 | 175 | 18  | 178 | 154 |
| f7339355ca575f466f41fbd988afcbff | 94  | 464 | 0   | 8   |
| 47fe6821dd2d2b005cf0f20630e39fa1 | 77  | 47  | 72  | 305 |

|                                  |     |     |     |     |
|----------------------------------|-----|-----|-----|-----|
| fefece970e8014d63d264423bb5aff9f | 94  | 71  | 15  | 116 |
| 417ee6799f70056ac9e353e91167e391 | 13  | 23  | 178 | 295 |
| e31e72ace4c42b9ad01cd4014010c226 | 62  | 28  | 153 | 192 |
| b2660e4d94bf3d5090251a73ccacd649 | 32  | 40  | 109 | 359 |
| 533fac37714f85a99d63b46558b0c6b1 | 128 | 0   | 23  | 0   |
| 089d44bdc5ac2bd79dbdd83a8b58aecf | 440 | 4   | 9   | 0   |
| 72105f05ef86b56deb4cf951bdef62fa | 41  | 412 | 7   | 0   |
| b5d810287022aeb023caf8ac8a22e55b | 177 | 99  | 0   | 0   |
| c763edada8b76d1af221b9c34eb26568 | 127 | 182 | 53  | 146 |
| 6b25c487cf84a387ae82197c99fbe82e | 269 | 0   | 0   | 0   |
| 9e7ce580acbef458473bd1bb31500f5c | 163 | 90  | 0   | 0   |
| 916344262b02db933329bd4f734c7f8a | 124 | 118 | 126 | 141 |
| d4e8fb6e5730003e5e44fed4393c4a1b | 166 | 163 | 114 | 83  |
| 1b0cd6861e2d4638a143e3c668b0715c | 41  | 43  | 82  | 314 |
| 664ed1b35be697e8283e9330b51a09b3 | 32  | 101 | 150 | 222 |
| b279370ea1c7b5d2d36a9538a18322f9 | 322 | 80  | 0   | 0   |
| 71a3698f93597184a7533ad1ba68819e | 0   | 23  | 313 | 163 |
| 5486844b955bc4e258152e4e6e1e2b5b | 22  | 61  | 59  | 64  |
| dfb444d0b7c249d21311b4c063719bcc | 72  | 298 | 56  | 112 |
| 9dff26151a1868393d3bd85a40c7caf1 | 59  | 62  | 45  | 196 |
| 806d56264f43fe71478ab3a36d968285 | 265 | 254 | 0   | 0   |
| 7e8874b85f6e99a082b0fd287c437f96 | 0   | 0   | 255 | 299 |
| e1640c8054d081061fad1623bf4c602d | 71  | 47  | 183 | 144 |
| 82c195652f1be4a1de8dbfc79ee7b788 | 26  | 186 | 127 | 25  |
| 777dd68b606758ba4b8810d87ed434e0 | 49  | 46  | 139 | 206 |
| d1db60a3c90f2bca8c2291650cd7bf59 | 3   | 20  | 309 | 156 |
| bff61165199d94e427849b747f99f8c1 | 0   | 0   | 34  | 475 |
| 7b1edea976a36d1a76acc21300a8e305 | 0   | 0   | 253 | 0   |
| ed4190611dd69d5be436ff64ba06a96f | 0   | 0   | 121 | 420 |
| 00d30653fb914d92e1e5a87c05f63a50 | 324 | 144 | 0   | 0   |
| 91a5018f4658bc8f824f4f01c001f5ca | 62  | 208 | 94  | 127 |
| c1c756f594504308a46794fd14b7f6a0 | 330 | 0   | 0   | 0   |
| c39086ab9969800d32deb2745b035414 | 0   | 0   | 241 | 0   |
| 17f61e91cb7e63fe20ae8a693f039338 | 25  | 52  | 120 | 208 |
| eae5239b80920ed98d661b2fe33ed8e2 | 41  | 388 | 0   | 102 |
| 1abc7bc741864f4330d611917d0754aa | 59  | 30  | 123 | 303 |
| 1be740156040f78d0826592cb8a07bfc | 0   | 0   | 0   | 0   |
| 29635491d729525b52a11f81671920a3 | 372 | 122 | 32  | 0   |
| 3b54f0d2eea498d4095aefd0456932c7 | 110 | 11  | 220 | 56  |
| 68be6035ac6ad5638aa738a13f6042dc | 0   | 23  | 167 | 129 |
| 291dc55327656beb11d9edbe4b4958ef | 186 | 270 | 0   | 0   |
| 6725eb73cc26055c7740864d97ffdc62 | 102 | 50  | 66  | 110 |
| e53438e3820f2f16764364ffca8f0599 | 96  | 72  | 69  | 126 |
| eb96b56067df4ae2b4d03fb42d23a3ab | 14  | 40  | 99  | 337 |

|                                  |     |     |     |     |
|----------------------------------|-----|-----|-----|-----|
| 3d0b9fd6fff5d2f1dd96b350862880cf | 0   | 8   | 501 | 0   |
| 876e1f6d125c1e6334a407ca531ad37d | 84  | 34  | 79  | 0   |
| 63d33e23b0cad706d8173eece2317cd4 | 7   | 9   | 382 | 58  |
| 8224d93ae5545efb9b1431cb01f48f7d | 155 | 224 | 0   | 130 |
| 013317cac80b1a2d30dd973b3ba2d183 | 144 | 296 | 0   | 0   |
| bb8825653878f9113f95919df8165760 | 34  | 91  | 77  | 149 |
| 6d60f9a24a02c33e5b2f5d4fb1daf81f | 85  | 0   | 160 | 258 |
| 63e0f7a3d9ecd273956314a549270088 | 17  | 23  | 166 | 87  |
| a6d61a7dff08902698b3c41789f2c707 | 17  | 32  | 422 | 8   |
| 46ea82fde3a0a36fdea6007da1d2f4ba | 33  | 26  | 303 | 85  |
| 5132eb82f101a28f805b51d24e83fd97 | 0   | 136 | 65  | 254 |
| 7975be6de233de0f614c0d15f9185b32 | 0   | 71  | 212 | 165 |
| 1c7f2b2262ea70edaacb298fbc89ebc5 | 10  | 82  | 0   | 85  |
| 4f711cd6fc8633dd28bcd68da136cb2a | 0   | 81  | 28  | 285 |
| 614aa0c41be8ee8054cca3554772a2d2 | 446 | 0   | 44  | 0   |
| 25b252e232c6a45f327f08ca5d817d0e | 16  | 0   | 124 | 287 |
| 44744536282c4c14eead47a630786a4a | 53  | 92  | 128 | 155 |
| 393233d2c49feacbffd448d1d3255c1  | 112 | 56  | 140 | 56  |
| bec03f25d90b3e29fd277c3355032b45 | 55  | 82  | 248 | 80  |
| 75705cad2a82832413efb70bf09f0a9e | 58  | 53  | 128 | 121 |
| 49598ee3ef55ddf776d3c3efc2d93e24 | 0   | 0   | 171 | 180 |
| b7392c1e12da53725b6e717f4981126d | 29  | 200 | 123 | 102 |
| c03c28e1cb613eee4e42377346d56ee2 | 0   | 143 | 0   | 0   |
| aba1a7be70e666aa95fe691f23766a1d | 0   | 0   | 474 | 0   |
| 330613856e18f78a024138bfd031c430 | 0   | 0   | 472 | 0   |
| d4c26bc1e38a8557992f8641ed1a2c8a | 34  | 59  | 119 | 43  |
| 44d62c70ea260630166cb2b43af1e5e0 | 132 | 163 | 80  | 83  |
| ffe6ba27988f40730b117dbcb06f1461 | 78  | 176 | 122 | 77  |
| 3d604318377b5ddeb40b6c89fb62d99c | 37  | 43  | 106 | 278 |
| c7908bfccca2c5eac0a663d00bc75baa | 81  | 333 | 0   | 0   |
| 5d7715972f81ca7b58099eb54d0724ad | 76  | 32  | 204 | 122 |
| 65eb16bcc552de2640772a6fcee2e5e0 | 0   | 0   | 154 | 308 |
| ee246209a24836ee4d7b1c80948fd0b8 | 132 | 61  | 36  | 25  |
| 29b0d2f93932b42afb249ff86fdfe67  | 0   | 164 | 0   | 243 |
| 54e41f7b21e5f2956bb7d8b8c9291a38 | 0   | 0   | 60  | 333 |
| 93024ebe561a735e5496209b10f8ea16 | 162 | 189 | 75  | 0   |
| 1ff70fbddf3ccd7c16a5fe7124baa271 | 157 | 268 | 0   | 0   |
| de4f850d1836f6753c638631a507db5f | 136 | 60  | 0   | 235 |
| 28fe006f85611ccc09d319bf299d741c | 0   | 0   | 42  | 280 |
| c7bfe8d7e8bede2ec2a1b2e60a3aad4  | 49  | 15  | 283 | 100 |
| 62c4b0e4ea55d5664521a0ad5eec2e72 | 2   | 0   | 161 | 108 |
| 5249c6dc1ab79aee8da5a839f8a87e18 | 19  | 179 | 146 | 66  |
| 0821e72a2b5215b41f4ee0f173099fb7 | 0   | 50  | 0   | 0   |
| 9c280d69a2b4b5b07ea7a8d32be64913 | 0   | 0   | 141 | 0   |

|                                  |     |     |     |     |
|----------------------------------|-----|-----|-----|-----|
| d474831d4b42937536f5d862d1423db2 | 57  | 50  | 213 | 102 |
| 1a2e12038377659c9f7552762e11f4e5 | 0   | 271 | 59  | 48  |
| fd80e4441318fc4c4e88b726323966f9 | 68  | 32  | 52  | 181 |
| eb4cf118f72e39ffc5904050a3f8f020 | 52  | 48  | 113 | 142 |
| f9512c23f88a786065e56a87f635ab52 | 59  | 57  | 88  | 122 |
| 231a2c2c3fadffb92707e64f8693119d | 130 | 63  | 117 | 36  |
| 23da3a29ee96a4c129ad60bf010b5f9e | 37  | 37  | 63  | 279 |
| 0d90638d8d93752ab8c551d046ee5c8d | 0   | 0   | 39  | 0   |
| d21cb9e09a70f309a8b44232769ed68e | 284 | 148 | 0   | 0   |
| 5d888c4f1d83f046841e0b080d2e66f4 | 102 | 143 | 7   | 0   |
| ac0bc274e28a7689b6b9421dbc33762f | 83  | 107 | 100 | 62  |
| 81a295ad3b913765b86b01a6b06420fa | 0   | 0   | 211 | 194 |
| 6fdb49e91c12a47c0398c90f37e7974f | 0   | 53  | 0   | 213 |
| df398968eec8b8be620673978b26fb4e | 0   | 6   | 0   | 419 |
| 56d689cc8503a576e2371b137c6c9701 | 44  | 133 | 72  | 174 |
| 71973b158ce2f2a9bf5e4dd8f01790c2 | 7   | 168 | 196 | 34  |
| 6d9229798754e188e8ea9744c0f70d85 | 31  | 18  | 311 | 26  |
| 7a1b2f6c0424ddc1e021e0987738a485 | 134 | 56  | 42  | 0   |
| 4634f240657a557b6f6b85a23c83053b | 392 | 0   | 24  | 0   |
| a313beb501e5a1dfd95be4255d50fc5b | 0   | 0   | 57  | 93  |
| 8e4e712a4551f0273f025e560f7576f3 | 271 | 77  | 50  | 0   |
| 3ce0f9074b4c92a69f6ad327d0ed9de8 | 84  | 49  | 98  | 76  |
| 84480a4b335049e4833b8bfa379b52b3 | 131 | 232 | 9   | 40  |
| 37daa95fe742737c7b8661ad25c235f5 | 0   | 0   | 45  | 367 |
| a433e0a03b8c636beff654125425fa72 | 94  | 0   | 55  | 195 |
| e0ee97a440621d923c2c96185b3847f0 | 0   | 0   | 146 | 0   |
| ccc721434383f40549ec54bfe9567f64 | 0   | 279 | 32  | 14  |
| 2aeb225dec36efcbb1017fbc1078ec3f | 29  | 83  | 49  | 162 |
| 697b13b43d51273aea414c9d7d2037ea | 0   | 85  | 225 | 97  |
| eea8a6a07f995d1f7ed914e64c23216f | 0   | 0   | 0   | 0   |
| e05684ff28c1f49045a983c24819316b | 0   | 42  | 0   | 308 |
| aa3dd341b84670084429c62e94cddea2 | 29  | 12  | 0   | 278 |
| 621c2998179f9151c6a969970f9db2ee | 97  | 75  | 138 | 43  |
| 5f0f86479e7a24915815c83b0be70ef0 | 0   | 10  | 28  | 326 |
| 8de013940c0887e172a8b68fb364ce63 | 52  | 120 | 121 | 54  |
| 1c9fbec98baa1fbc74562af0dea357f2 | 114 | 0   | 0   | 0   |
| 588c7559489ffbe3657c952c0902a2e6 | 382 | 0   | 0   | 0   |
| 0784cefc5a7757f317c0e1b4d9d07c0e | 105 | 119 | 68  | 7   |
| ea7d0f0309418a7d0de7cf311b6c1b9e | 137 | 247 | 0   | 0   |
| 4179aa0cbd75e8fa60a2ad9406512099 | 18  | 101 | 72  | 154 |
| aee0040f957c891a609b619ddf6dd608 | 64  | 29  | 125 | 160 |
| 078a0b4124878834f8520cdea7e9dc6b | 133 | 0   | 257 | 0   |
| e22410ca66e9c117ab4e212ba443d844 | 0   | 0   | 0   | 0   |
| cff019cf26502ba681a8d2b2e6f04363 | 107 | 8   | 78  | 49  |

|                                   |     |     |     |     |
|-----------------------------------|-----|-----|-----|-----|
| 9058ea9553618758c6d0edc423f92e67  | 74  | 43  | 227 | 0   |
| bb9fa73031e0078614369009b6b4658d  | 65  | 61  | 218 | 0   |
| a8aa396aa254729216890fc6ad677a1c  | 0   | 0   | 225 | 0   |
| abd6d17d5333d537f57cf08c96000b2b  | 0   | 69  | 59  | 42  |
| d269ae979596a1c44fb323420f88aff4  | 81  | 69  | 87  | 61  |
| 4ced68567be41bbab8b12a213a627782  | 0   | 143 | 74  | 29  |
| 9db2ca551789de592370d019d326ca46  | 0   | 0   | 75  | 308 |
| 6235a038e987a6eb8f2dcdcf2f4bee979 | 16  | 39  | 38  | 182 |
| e8499ce377c7ea30fb748c6eb737fe9a  | 0   | 0   | 26  | 0   |
| 76f40ea8ea27d565dfbc52228cc8c529  | 0   | 217 | 21  | 0   |
| aefb6f911d464c1dbd2a797b681ae5cf  | 31  | 0   | 170 | 179 |
| f67e5aa2699dd78de7b1057d8978d5b2  | 43  | 21  | 85  | 217 |
| 42f80bd6b3055de0158ebf6390edd1b4  | 0   | 107 | 163 | 64  |
| 16a11c0cd04ac1bbb1d21d68e78822dc  | 137 | 68  | 0   | 168 |
| a4951585b8e72263e493e6323abfa8d7  | 0   | 105 | 43  | 209 |
| 7c89569aef23b62d5fae87840f202354  | 0   | 180 | 0   | 193 |
| d7bb1ac5656606763df63c740e9a66f9  | 30  | 0   | 69  | 184 |
| 0d7bc7195d152953882b6e566e42a6b3  | 7   | 252 | 14  | 93  |
| a7bb9d3e704bace831c4a2ab7591630d  | 0   | 11  | 307 | 53  |
| a0dd87e46f1d6408c7bd8b2ea9a6ac8c  | 0   | 113 | 0   | 257 |
| b1636e9d60b5c188c6eda2303bbc4192  | 121 | 32  | 80  | 47  |
| 6df22efebda6df29e7f9ad860368b9ad  | 224 | 69  | 0   | 0   |
| 950e14af30868e5e811f7c9aa05160b2  | 83  | 41  | 113 | 81  |
| 2eaccb9a9987e4b5dc8076fd09958367  | 6   | 36  | 238 | 88  |
| 4509fd6b027a2383221ddc35213fa0e0  | 0   | 200 | 0   | 12  |
| 7d54664b14587cdbaf18a0e3a1f6c231  | 139 | 21  | 113 | 93  |
| df8ca2692141028441f58603fb15dcd5  | 137 | 0   | 0   | 0   |
| 1e9af93a45c36a3dccecf55e349654e0  | 27  | 56  | 214 | 42  |
| 7ed97455b7b47bda552d0eb664f0d1c8  | 9   | 9   | 175 | 168 |
| a9026d506e580427871534ba7f31c5e5  | 62  | 0   | 40  | 237 |
| 145eb8a723053db799ed16f885eff1c6  | 0   | 7   | 297 | 43  |
| 9e19bf2d79667b0ad1603ef14448cc8f  | 111 | 110 | 0   | 58  |
| d7ec9525b96c766f8e21866267d70513  | 27  | 49  | 82  | 179 |
| 1407b4dc119d00684717fdc1518a70dc  | 108 | 53  | 9   | 6   |
| 86f631298f7d349f6062f7133aa96c70  | 28  | 18  | 33  | 225 |
| b7b8924f3ea452a34148120303263038  | 51  | 55  | 129 | 104 |
| 810d71dd24cf368163d4eaea56406e20  | 53  | 77  | 111 | 34  |
| 794e339e85ba5264e94a71f8a979da5a  | 14  | 336 | 0   | 0   |
| 9acc087f082577d35557426b5369efe6  | 80  | 61  | 25  | 7   |
| 51ed28f92186fbe44bf3e35327832263  | 12  | 68  | 56  | 213 |
| 9fbbbed01b43768c2cfdc31b01b58f2da | 29  | 45  | 73  | 199 |
| 9f4d1f290881b4ea18c87b1dbb8d0689  | 73  | 0   | 238 | 11  |
| 16c93f7e76b6cd23a77cc74b20d0db37  | 64  | 5   | 69  | 114 |
| e043eb1a95cbec08c8c713a7c465c929  | 38  | 6   | 51  | 165 |



|                                  |     |     |     |     |
|----------------------------------|-----|-----|-----|-----|
| 62ae8991978ec26bb97582334b66261a | 0   | 0   | 110 | 231 |
| cbc2c3da35cd04771bd198c552497b0  | 0   | 0   | 333 | 0   |
| d3083d224d1fc00112655662e60a993e | 13  | 56  | 9   | 224 |
| c11afce3177e4855f2e1c0d27407b6b7 | 136 | 89  | 0   | 0   |
| 26d98efa38e835733f817b6900d10ed7 | 279 | 0   | 25  | 17  |
| e69c10f2b3fc38a0ef86cc8c537a1c44 | 0   | 210 | 83  | 18  |
| 9eba3bc6f1fd5787a5f5dfd7bb7f9b93 | 93  | 19  | 0   | 106 |
| 6a32dd55c27379badfc5160c3230a397 | 40  | 58  | 23  | 120 |
| fcc0badd515767cbd745227fb2b888fa | 59  | 0   | 0   | 274 |
| 29031f2086d56e6bc1a51d6d5ecafe5e | 0   | 0   | 61  | 272 |
| fa738e9da47d151d0acc599d50e86c2a | 115 | 68  | 100 | 0   |
| 635406fa03f82058c489f222171a1918 | 8   | 15  | 43  | 226 |
| 2c8036f2bf60f45bd0bd090e7ecad393 | 46  | 0   | 0   | 162 |
| e3d67b74c4c897cd57bc41bba12af831 | 41  | 202 | 53  | 11  |
| e30a0f04df54a49903da30a52df1dd69 | 10  | 10  | 93  | 154 |
| d2ffbb435fc901add7ff8ae5d5c51b2b | 0   | 0   | 80  | 129 |
| 0f6c328370fd6ecef36c5751e3221fb  | 0   | 0   | 37  | 20  |
| 21cfe96592c4fc60f6153d242dfe3534 | 81  | 181 | 49  | 4   |
| 232f79d52ad6a2dfe3061377cc4df9bc | 101 | 176 | 46  | 0   |
| 2988c61eb83dc7e224d9c4993eb05de3 | 0   | 0   | 25  | 298 |
| 034b47ed11a1a3f7a51e12c21c02721f | 102 | 23  | 55  | 85  |
| 4cb3fd039eb01a417918dd3313aa6e53 | 129 | 193 | 0   | 0   |
| 9338ead41a22518ed5be0e449be33019 | 0   | 0   | 0   | 129 |
| 748b736682f61b7b10ee379097b18b83 | 122 | 132 | 67  | 0   |
| 3cdfa7880266db0e5b2aa6aac6804a82 | 0   | 34  | 24  | 226 |
| a3e5ed4f236ccc0603c2f0bb49cf6883 | 0   | 0   | 275 | 0   |
| 43c937f926b5582d421386e05c9fabdc | 27  | 0   | 94  | 196 |
| c166c33c78b2c6b34140a8153da02fb8 | 136 | 27  | 0   | 0   |
| 1a32be7325ba6f4d2e41d053d2da97a2 | 53  | 17  | 55  | 190 |
| 9b5e74ce058568e9a37e58836acda388 | 0   | 82  | 10  | 75  |
| a73e02579d09a682a792026052d82b2e | 135 | 83  | 0   | 0   |
| 2c8d8f32d42d7d6409572dade199019d | 43  | 0   | 0   | 271 |
| 274389b189da1f6136b33b4015d193f4 | 12  | 132 | 45  | 119 |
| 9b24cb36901b4193a049dd8bda51e0ae | 13  | 298 | 2   | 0   |
| 223942d5341ae5e703e7e03f69391b30 | 84  | 74  | 64  | 69  |
| 94518b7655c5bfae9dc4d1f376080680 | 282 | 28  | 0   | 0   |
| 2a78f99484feecc1363f74cfc2856d7a | 145 | 14  | 77  | 69  |
| 6c58c6792269aad8fd8154aa74d56cc4 | 0   | 305 | 0   | 0   |
| ea74f77e4100bfb6cd781caec7405bc0 | 0   | 65  | 0   | 237 |
| 6724c390cb160aa61a7609d8c890c1de | 27  | 14  | 11  | 232 |
| 99919eec8f330de862e1a6b4826245bc | 101 | 0   | 33  | 172 |
| d3770008434c77cc586fd143347621a2 | 0   | 0   | 111 | 192 |
| b1398a0c61caa674cf56b72481497d01 | 21  | 14  | 0   | 242 |
| 16d7901f8a382d275770aa3141c6f33d | 8   | 118 | 23  | 61  |

|                                  |     |     |     |     |
|----------------------------------|-----|-----|-----|-----|
| 1ea5dbf91ed43507c5a85cc496123211 | 83  | 36  | 35  | 34  |
| aab2b7b06630c8beb6bcae60ec67370b | 27  | 13  | 69  | 172 |
| f17218af2cd918ff39ba758d7a589ecf | 18  | 69  | 24  | 184 |
| 6f4f9861152f1f8721a0abe2e327e945 | 38  | 37  | 178 | 30  |
| ee8f7ff9f92442786844382a40c3fef7 | 14  | 22  | 182 | 67  |
| 99f4f6060a26efacd1bc1bface6ab915 | 67  | 0   | 68  | 0   |
| e25931175cd4b13b1fddc1e686dc8c1f | 0   | 0   | 192 | 111 |
| 7cd280ebb1596174f577e35b9195ad6c | 58  | 21  | 30  | 168 |
| 33e87f6e1cd623fbd7aa9d9ac5f51ad1 | 50  | 102 | 62  | 42  |
| 38b83a8a6b741606457e2d46c2ca8398 | 89  | 66  | 10  | 106 |
| d5bd0acad1ed4f3e8c81060a973b0fd3 | 27  | 19  | 208 | 23  |
| 97f95ba702dbb580f76ef9abbb00cd2f | 80  | 0   | 66  | 27  |
| 53bb6850e791c6e3ff83cfe20e7a17da | 8   | 0   | 237 | 17  |
| 75e7db748d5407cc37ece8f24941260a | 42  | 7   | 81  | 39  |
| 476a13fd5196c0b1046ee8d2688117c1 | 35  | 7   | 82  | 129 |
| 8ba5baa98b565d7002e406c47e5d8fe6 | 32  | 17  | 202 | 40  |
| 549020038843f4ac367d1e1d4c966517 | 22  | 25  | 9   | 180 |
| 28305d325bb5490706d06fe944415979 | 20  | 72  | 10  | 36  |
| 9d6fe45dc9242b74ca6a4cc03fd42741 | 13  | 15  | 86  | 86  |
| 13a9630ea29536b4792646216d11398d | 0   | 205 | 10  | 35  |
| 32ed31b4bc89e624d4007200932fa838 | 33  | 0   | 181 | 46  |
| 0e4be92dddd0aaa151fdd996df10e4c9 | 62  | 46  | 72  | 49  |
| 1efde410edd39beee529f6383ee220a6 | 213 | 75  | 0   | 0   |
| 50a1830129a8323b405006574adc3244 | 0   | 0   | 190 | 0   |
| 8233c1428cd1609bbcf35160ccea7c02 | 0   | 0   | 0   | 288 |
| 0198bf1ac6a313ea309c6457c1173c17 | 0   | 0   | 0   | 288 |
| 755bb1923faf660bab7f8d4058065f80 | 132 | 38  | 20  | 0   |
| 8a5abfdcce708b8518aa39ac2d1844d4 | 31  | 39  | 71  | 28  |
| 65822bbee514ae6e872951e978573558 | 50  | 40  | 122 | 34  |
| bd8692038016c4f45b0451c97c7ec819 | 0   | 18  | 43  | 189 |
| c62ee6f0d0576b0e501776d6e70d9619 | 61  | 0   | 167 | 56  |
| 05b9c1e084bb0dfa9646a6600f1f46c7 | 0   | 204 | 0   | 78  |
| 3633094cc750d31060ebfa45530e3ac0 | 39  | 0   | 2   | 26  |
| 09e12d02de4cdb0e21909f0215db744c | 34  | 51  | 27  | 168 |
| a7c1115c310a85dc4d2e8d50b41f4cc0 | 12  | 43  | 73  | 140 |
| c854a068e8aa4384eaf79258e2ee0b03 | 13  | 36  | 47  | 111 |
| a78c90b77b8da7e25b2933c55c3ddc6b | 30  | 46  | 114 | 85  |
| e7db5434ce895ea8a2d364e2e7417b02 | 67  | 131 | 6   | 75  |
| 7709f139f0b2758372fe8975b36e02da | 73  | 0   | 0   | 179 |
| d6e7ebc786e059e876da7a294a49f171 | 0   | 0   | 0   | 279 |
| acb2c243fddf9cb6df04f31d9927616a | 0   | 57  | 75  | 146 |
| 60314b5e141b2cceab07dd747f9c03a2 | 202 | 58  | 0   | 0   |
| 4187d7aaff3416daa79826fd0829141d | 18  | 0   | 184 | 75  |
| b7e96108676cee607afdd85143cb59af | 0   | 0   | 0   | 233 |

|                                   |     |     |     |     |
|-----------------------------------|-----|-----|-----|-----|
| 3bd6b8d0b5a7e12ca39e20a56bc2f22d  | 44  | 29  | 47  | 126 |
| 4a65d8a13eca87112c1c214a24639030  | 24  | 117 | 74  | 0   |
| e31de84603147ea6ffbf67b6e213e89d  | 50  | 40  | 61  | 14  |
| 7728d787254c4993c81aa8b733bc8670  | 147 | 50  | 0   | 0   |
| 6e72ed7de920e7498260d1bc4baa786d  | 45  | 185 | 0   | 0   |
| 2999e3a7008c65fc3e8e7820e5c2099d  | 0   | 28  | 60  | 163 |
| 0a54ec0615e29e26405160ad1452dbbd  | 0   | 0   | 90  | 181 |
| 9a988938a203ae3c6a829c760d86e00a  | 60  | 59  | 49  | 20  |
| 24e597c64eeb24210cdd115b338619c8  | 0   | 53  | 0   | 216 |
| c997d3bac266b7bf0abd93d399eea5a5  | 138 | 29  | 48  | 0   |
| b20ccd77b63153264eaa1625390bd34e  | 25  | 59  | 0   | 28  |
| c3819d8a7a0b47c1589ab0a9ffd74ca8  | 52  | 37  | 43  | 73  |
| 1dded46455aa5db286acfbcb65672dc98 | 110 | 8   | 16  | 109 |
| f9d0e870cb84c4efa509ea0200e7c784  | 95  | 15  | 42  | 70  |
| 7980472446d5bc12d3db8cd1bc9e3659  | 33  | 103 | 0   | 129 |
| 5556388c13ce3c501de4589d7779702c  | 36  | 125 | 42  | 21  |
| 3dd327313d461905139faed468a34a36  | 0   | 0   | 0   | 0   |
| 7e159529f2255511ef5958fb621f0271  | 0   | 37  | 28  | 175 |
| 492fd513ff543be123908d3141d6d88e  | 0   | 0   | 265 | 0   |
| c914dcad8ff2a40159d36796e3773185  | 12  | 0   | 35  | 143 |
| 0646635efc58476d5f617ce80bf1509b  | 65  | 77  | 54  | 55  |
| 7d7888f4554ec0ebac67a232e1800626  | 44  | 31  | 58  | 130 |
| 9ba21c5c9bcaf66e85b10fdd98da2987  | 110 | 20  | 15  | 117 |
| abb41e8d91b932b871e530ea07d9feaa  | 44  | 0   | 0   | 218 |
| 3ac84b6124eda7da52349f8a82ebe953  | 0   | 76  | 139 | 0   |
| e6f258747f9bf1b9a661fb64203a9a28  | 0   | 0   | 0   | 105 |
| 4fad55daa352356af40293871c2a8150  | 69  | 168 | 0   | 0   |
| 00592f1624626db6aa0f808b63f9b725  | 153 | 0   | 5   | 103 |
| b82437e226b6d52977dd562f7cfee9c0  | 0   | 57  | 0   | 0   |
| 8375593c6800fca7d18a4d8111cfb75e  | 0   | 0   | 92  | 169 |
| c9e913433430ed658e490343e98fce6b  | 0   | 260 | 0   | 0   |
| e5b9ab00d94f398ac273cc6ce27f289a  | 0   | 0   | 0   | 259 |
| 8715e819799e001d83ee3772e6999382  | 56  | 99  | 0   | 0   |
| 2d3d30d260bca6a36376443721ad4e79  | 13  | 150 | 0   | 94  |
| 4279245aeb8de3ccedf794f7659c375d  | 78  | 65  | 33  | 0   |
| b74e42e3a9754b42bd7da1ace3de575d  | 38  | 62  | 60  | 90  |
| f47b068d01f1d5608b45b110a55065ba  | 17  | 51  | 7   | 143 |
| d65c70b5800bfa4738459a03dccc52e4  | 0   | 0   | 154 | 0   |
| a5dc479d8aac945b3b1851d4b8eac5f4  | 111 | 72  | 34  | 38  |
| df652442e6ee7d6e590383e67738281f  | 0   | 0   | 0   | 246 |
| b3a3efd4db5ba1cf0f67ec207943e968  | 89  | 50  | 0   | 0   |
| 58225734163209910fc7df83bd14263e  | 0   | 155 | 0   | 0   |
| db98a868f2061f44e02f794a1065f9f1  | 0   | 0   | 173 | 58  |
| 3416da46f1675c546379f51ca47670e8  | 33  | 0   | 109 | 0   |

|                                   |     |     |     |     |
|-----------------------------------|-----|-----|-----|-----|
| 25db4a960a9a99f66385256a9a768e00  | 0   | 91  | 0   | 0   |
| 951d5498962a92d69b076ed3cebd576d  | 0   | 0   | 0   | 0   |
| b8e272f1e41bcb8d4011834e6af213f1  | 89  | 72  | 32  | 52  |
| 422ec8f6f543650b904ecdeb57006408  | 50  | 46  | 57  | 43  |
| d3d397b9f52b813d25bd32d6d147537d  | 161 | 47  | 0   | 0   |
| afbd6b9a8c7f98cdf198f1cea2ac699c  | 55  | 30  | 102 | 26  |
| ea77ad80e08a39ab85514d400b8980f5  | 38  | 49  | 9   | 148 |
| 7df610e63e14ed64f727741fd81b0165  | 0   | 146 | 61  | 15  |
| d8b5552590346e3b5578e6a58bc6370f  | 0   | 77  | 8   | 141 |
| 1cad8afbbab5c2d51e61e01ce30280a4  | 53  | 0   | 18  | 64  |
| c7c4ccc2f6b718c880101741c0c5e620  | 0   | 0   | 89  | 0   |
| 05c1bc1a6c36e58b4730db4c5f9f5481  | 0   | 0   | 0   | 246 |
| 8ddb918c3ea0a1150aa0d1dbf71165b9  | 65  | 31  | 41  | 44  |
| 742756da70d2208ce5bf0c09dd7f4b8b  | 90  | 78  | 0   | 3   |
| d1046f6363642028a00a52c29a57e454  | 73  | 0   | 0   | 147 |
| 00bd0d7713bcf2942afec96137fe0076  | 0   | 12  | 0   | 203 |
| e4f5f11ee62bc0c3517fcb4853d190cd  | 0   | 0   | 0   | 243 |
| 4c9801508fdf4c7e270b374988977096  | 0   | 0   | 0   | 243 |
| 6b731789e4d7b3ec65854dff84d19b76  | 36  | 6   | 0   | 192 |
| 1553365cf2f66e66188439721030f0fe  | 157 | 7   | 28  | 4   |
| 5005ce543e29ba23dbbf10b798908a01  | 24  | 0   | 217 | 0   |
| cf36009498ab20dc36fe6d4d1906fb35  | 35  | 0   | 206 | 0   |
| 228550112acb95584b4788642f310827  | 0   | 0   | 0   | 96  |
| 4b038e4bc8ccad254ee3cc2b4680cd8b  | 0   | 0   | 133 | 0   |
| 14660bc4641c5d6c5d31301d2ab051c6  | 109 | 52  | 25  | 19  |
| 8bc5ba56c32ccf8ce9074f76c8573219  | 6   | 85  | 84  | 32  |
| 93c394142eb447111872277bf3ff0142  | 0   | 49  | 16  | 173 |
| 9590d72b2e0cf8d09c71c01a74c65da2  | 62  | 62  | 9   | 78  |
| f1464d0870843a908bbf1a6c23ceebd0  | 86  | 0   | 85  | 29  |
| dba4324c25440a8c8a52c05bd1c5dbbe  | 52  | 6   | 38  | 108 |
| 80f3beb1e280e5eaae1d2e3200f688d0  | 23  | 40  | 107 | 66  |
| 3a5ed81ef9d7c07f2c540f43f7a99afd  | 56  | 19  | 2   | 3   |
| d958c3335f0ca2974f7e8a10a306dfca  | 68  | 18  | 30  | 87  |
| 3adcb170602cd7fc359b75bf7c7f71a7  | 58  | 15  | 0   | 117 |
| 8f2da92a4c8833cf9b264a49c5e588ef  | 0   | 0   | 0   | 233 |
| c8dca1b72581a00946ce0b1ec03a1f64  | 0   | 0   | 180 | 0   |
| b28fefb2ad003270a21b1df37fc52d5c  | 71  | 0   | 53  | 88  |
| b27bb504651c1c804a0705b091d41a8f  | 150 | 81  | 0   | 0   |
| 7ad901cc77e6a18d79fb444576e74bf7  | 114 | 9   | 46  | 41  |
| 9685c563eabe3e4dca9d2505d4b92e3a  | 68  | 79  | 82  | 0   |
| 73cdee37581b15a95c3a6b611d6ff96b  | 35  | 0   | 139 | 0   |
| 699ae9171f232c78cfdcfbc1511199673 | 0   | 0   | 0   | 0   |
| 71bb3dd7b229e5c82f0377f4953674a4  | 0   | 91  | 137 | 0   |
| 77145ea80f4491714a265668cee3b1aa  | 0   | 57  | 21  | 0   |

|                                   |     |     |     |     |
|-----------------------------------|-----|-----|-----|-----|
| 64ca3fd5896cd1f562f0385f599e1902  | 0   | 18  | 54  | 130 |
| d243eaf719a8d29153e057069270f7a4  | 0   | 0   | 24  | 203 |
| 2bc0a0d8259ae62cd4d6a3e6328644b4  | 0   | 158 | 68  | 0   |
| b9fc17f83707ce0c93910f89b5bebbb3  | 28  | 0   | 0   | 196 |
| 59579ffa6e78e0f9db5e9e5dcff39d3f  | 0   | 0   | 108 | 105 |
| 9f7e0bec5d66254585babff62ea4a100  | 0   | 0   | 80  | 143 |
| bf825ca9569b41180f9121829cf6a43c  | 0   | 0   | 223 | 0   |
| a7579339873d04d5066287dbf0494e6d  | 77  | 19  | 57  | 35  |
| 95ee68ac0540d75b56176abf2bfca0b1  | 0   | 0   | 82  | 0   |
| 967f263b45d72edb99829afe54a620    | 0   | 0   | 17  | 185 |
| ac216a190398d4afeace9da125053883  | 0   | 62  | 20  | 88  |
| 17c73958dc60bf327231a9322af9cd39  | 126 | 38  | 24  | 18  |
| 29ebadd4248596250d19650aae3248bd  | 31  | 21  | 20  | 138 |
| ebab0b26239d88db37b5992794f17cd0  | 24  | 26  | 27  | 133 |
| 2b183ef03e9bb99626250914dc1296c2  | 0   | 0   | 0   | 219 |
| 8a48662eb844306f085742e042a0ec90  | 167 | 12  | 11  | 28  |
| a1cbe31afe02bb8b2a7653af878b50d9  | 98  | 21  | 25  | 72  |
| b9328aac7ce42f1d4ad25c07967ea69b  | 0   | 0   | 6   | 6   |
| 363652c053efc170fc4c49496f117548  | 69  | 100 | 0   | 0   |
| 9158ab694988e84ec137cfaee88fcd2a  | 0   | 197 | 15  | 0   |
| 05ec91b32c1644eed4d22ffe0748510a  | 157 | 57  | 0   | 0   |
| c0523886ea3630579a6781e8cf8f7f0b  | 25  | 15  | 174 | 0   |
| 28da709288f80f78e27f17f969da42dd  | 69  | 112 | 32  | 0   |
| e0dbd15d5d707c115c05b3448d9bad80  | 0   | 0   | 17  | 141 |
| 7fcbf5c16347eb38204cb8c200079658  | 0   | 33  | 110 | 70  |
| a518a607ec6c03bd9f0ea8c0d325c6c5  | 0   | 0   | 0   | 213 |
| 8d2c369f49b3b611509e928f3ea53452  | 60  | 27  | 13  | 78  |
| 7ff417e014273bccad3a4449045ccb72  | 0   | 16  | 44  | 13  |
| 232a3ff448e9df3c02779766fa4cfab7  | 0   | 0   | 0   | 0   |
| a21c40abc2411f94b6e2e14d5e7cd3d6  | 0   | 0   | 0   | 211 |
| 9a2aa1899c2eb5dbde31df473cd05b24  | 0   | 0   | 130 | 81  |
| c0dc672f268d8673e3fa4d7db4081d7d  | 0   | 0   | 0   | 0   |
| da6798600cd3321ff1b1e9b210e6ad3b  | 0   | 0   | 0   | 210 |
| bc6eff7080ab657d1e14ea9ff8fa90ce  | 29  | 41  | 38  | 26  |
| dad54efeebeda9947025e0c2ab1dd31d  | 65  | 32  | 7   | 0   |
| 5c5d917ed71d13df98cd29a1247affbd  | 0   | 65  | 0   | 0   |
| 4c138eae51a0c9cff0bde36a14c58369  | 0   | 0   | 0   | 0   |
| 3e823aa37213e0ecef41be8564cddbdbd | 0   | 0   | 0   | 209 |
| 48feed65e5d1040b15c61e74703475ae  | 66  | 56  | 2   | 77  |
| 6fa5a1f44a06d4976f0be258a95e1c12  | 0   | 12  | 196 | 0   |
| bc95329d3af2b712bc12e841126796df  | 157 | 0   | 0   | 50  |
| f99483d3dcaa7c4a0f394e628ea7f0a4  | 10  | 23  | 105 | 69  |
| 14501e801a03e0ecf26a4111206d4cbb  | 81  | 88  | 0   | 0   |
| ce888378290b0c703a228a5e89cc0794  | 82  | 83  | 0   | 0   |

|                                  |     |     |     |     |
|----------------------------------|-----|-----|-----|-----|
| b75cbbfb3beb35c2cbfeefc8059a853a | 0   | 0   | 48  | 137 |
| e858b8fdb51df77940f11e3e491a819  | 0   | 84  | 0   | 122 |
| 9706f8ec10ca3c5dcacb376e1ead69bf | 0   | 0   | 0   | 0   |
| 3f90acd1487266850d3ebed120c31439 | 0   | 0   | 75  | 130 |
| 438f918983ac31188f8f0c46381535be | 72  | 124 | 0   | 0   |
| 0b2b39983a07fa14c82f9fa151a03e7a | 0   | 0   | 0   | 0   |
| 40264f16120c357fa25e32f4c1d0cf13 | 0   | 0   | 49  | 86  |
| f1576c5cf99f837229e2e30a1e2ab5e1 | 0   | 0   | 18  | 121 |
| 4c4d65d9d36ce8aa995ef04fead68b07 | 0   | 0   | 0   | 0   |
| a0786f84c6445ef38d20ba8fc3fa153e | 66  | 44  | 9   | 66  |
| 34881ac7b9d6cde563b79605274d87a6 | 0   | 14  | 0   | 0   |
| 78f0124f7c23ba8c0f66c3619adcad9f | 0   | 35  | 145 | 20  |
| 69e03915d84fe4bdc4482a38050a5f28 | 0   | 0   | 82  | 118 |
| 339312452b6fc0f9de19221d2042136f | 0   | 0   | 61  | 139 |
| 2f7b935f347144ce7ac3bf2f2172621d | 31  | 15  | 131 | 0   |
| 2635cff71381e1df8c56089831bad621 | 0   | 0   | 0   | 199 |
| 6b4b2e1fd0d66d71247e661749a8d15a | 84  | 0   | 0   | 114 |
| 15511cfdfbead3281025c8a882befef3 | 37  | 13  | 0   | 148 |
| 8890ffdb2de910d3cfcc7078a070e2e9 | 86  | 112 | 0   | 0   |
| 4f49e9555e892df89782896d3f6f84ca | 51  | 25  | 35  | 16  |
| def36de8dec51de24e57ff436ccdbec1 | 35  | 49  | 0   | 0   |
| 90c5ae25dfcf83db351c58e9ec322c2d | 43  | 154 | 0   | 0   |
| 027c04f10ce92bfcad717988742efb37 | 100 | 0   | 10  | 80  |
| 3ec8e240821bfd20e15675e5c881682b | 125 | 30  | 7   | 0   |
| 409613af34c615b4bcb1b3c9f969e1c4 | 93  | 39  | 23  | 25  |
| a07933cbeda252b4ed9845848d449fd8 | 76  | 107 | 10  | 0   |
| 358433a7b178a7449e457d06bb04a960 | 0   | 89  | 57  | 0   |
| 821cd26befdfb5ae0f63a5e950e0bd7a | 0   | 0   | 35  | 158 |
| d3924749148faf3d71de62a9cc2ff5be | 92  | 0   | 100 | 0   |
| 5455e940f24acd9b073cbd356f5e33be | 26  | 66  | 25  | 23  |
| 5ee3923dcf3ce31b59faa4283835ab88 | 0   | 0   | 0   | 191 |
| 9f59d607fb258fe284848ed0f8a25782 | 127 | 63  | 0   | 0   |
| 523b216b53a233a8805a31d049f4078d | 70  | 45  | 57  | 0   |
| a353b70ef153331bfef952d4006c456  | 0   | 0   | 46  | 115 |
| 784dca285f97306857a0fb66d9ae74f3 | 0   | 65  | 31  | 93  |
| 29e1307a91ac17e1e02d71c95d72d286 | 21  | 64  | 38  | 25  |
| 8933a9448dc73ba18c3c51c4f2dfe707 | 30  | 20  | 24  | 114 |
| f605d79793a86dde59e78c9f0831842b | 0   | 51  | 0   | 137 |
| ecc137eb409002474cc9452c33dcbc93 | 68  | 33  | 0   | 20  |
| a2c944918d738de1a285fa886c7b60cd | 0   | 0   | 65  | 122 |
| beefe08431f5c81511a80c15c202b03b | 106 | 0   | 0   | 56  |
| ec7e05cb498dcf18d74c6e4503d7a670 | 0   | 0   | 47  | 139 |
| 97a90ba141d98f44fd79725e2ba4a150 | 0   | 51  | 0   | 134 |
| 264f4d149da6a1e2eb3fbd56ae9cba79 | 82  | 48  | 54  | 0   |

|                                  |     |     |     |     |
|----------------------------------|-----|-----|-----|-----|
| 96fde541d95e3dec329a7272db318af3 | 5   | 46  | 28  | 62  |
| 11e66d32453afb66499f7d0638263ba6 | 91  | 15  | 12  | 58  |
| 028b3e2a2954e4f856f9be95ef5e6759 | 46  | 88  | 21  | 0   |
| 2c450e69654fb6cdb27aa4e0358ea56d | 25  | 80  | 0   | 0   |
| 2305452d3e0f1dea4f9f64fd2b188df6 | 46  | 48  | 0   | 8   |
| 21b214121bdfab2ca12363036c2d830e | 36  | 80  | 0   | 0   |
| 8dc1f451cb46711bf81038ebedcd3c2c | 71  | 0   | 26  | 83  |
| 74d0353e670be3ccf4595adf87f46dab | 112 | 0   | 0   | 68  |
| 13517f8a5a2378fc2971bf3e7d17bde7 | 10  | 87  | 25  | 37  |
| b610e211bfe932d83974093bb09a4354 | 72  | 68  | 0   | 25  |
| e5400356daabb5a41f935af70513043  | 26  | 36  | 27  | 34  |
| ba4ae0b1cc52a359e6686dc78febcfa7 | 0   | 11  | 40  | 84  |
| ffdf6045e9ec8ab86ca08e37c7a06d74 | 0   | 43  | 0   | 115 |
| f8d6c63b540802de4805c95ed1733a31 | 69  | 70  | 39  | 0   |
| 2ba17d8f657a99d7b5b06e3ff52d0cd2 | 0   | 0   | 0   | 88  |
| 7fc49f05188173f70eed3974c091916  | 0   | 64  | 66  | 30  |
| 980a2180181cee9f5f5239e76f85f2ab | 90  | 0   | 0   | 87  |
| 273b97a1f4dadb7db5144b28e190f976 | 0   | 0   | 33  | 144 |
| a7aa4a9c9a987e46d3f0330457f15693 | 0   | 0   | 177 | 0   |
| 804bd06dbb3403305249cf57819387d6 | 146 | 0   | 14  | 16  |
| 8caa2879ec2fde806dc20ddc4ee72040 | 59  | 117 | 0   | 0   |
| 8c2a90ea481f0517c56ce717cd08f325 | 34  | 0   | 27  | 71  |
| ffbc79534737995e2c26b1569e2ba045 | 0   | 0   | 32  | 5   |
| 0ffb66c5ce2f5bc06f8c5374c4de50a3 | 33  | 42  | 13  | 24  |
| 3a9abeac2d723d2a963708811927448f | 86  | 0   | 33  | 51  |
| bee1ecda2f60aa09a48e5619e2750264 | 0   | 61  | 0   | 0   |
| 5d384d0ee3d0af2a99ed0d1eeb805d16 | 0   | 120 | 0   | 0   |
| f23090480864fedbcd34da8f0ae9c496 | 0   | 0   | 49  | 126 |
| d30216a3b10a6ec46bb362565ba3095c | 74  | 0   | 0   | 0   |
| 1b933ae306eca321b9c2d88a21eafe0f | 26  | 148 | 0   | 0   |
| add7328c27288fcb2ec9954f0fe73722 | 0   | 37  | 31  | 90  |
| d131d03818cc14cf180d7f768513f741 | 0   | 0   | 0   | 174 |
| 559bcaa8089ce192074b03fb30a2c7d9 | 35  | 54  | 40  | 31  |
| ca0eb1b092edef01cc3c9892bc63d42  | 94  | 50  | 22  | 0   |
| b9aa8e16f9f43359647afd88a9a240d8 | 0   | 13  | 0   | 92  |
| 56aa91b83f97f0e967295d3f17554ed5 | 0   | 0   | 0   | 0   |
| de493dcb2f62ed5803d6e5666fc9f38b | 149 | 13  | 0   | 0   |
| ac02bfc2b6276d544ecd1f2c44d5d8ae | 0   | 55  | 5   | 94  |
| c573cf2d5aa7b8ca688119c661207838 | 0   | 127 | 21  | 14  |
| 81ba3deee78b7b92d99643562e9e3a22 | 0   | 126 | 0   | 30  |
| b90931b8e1bbf925ebfa3ffdf554dd5f | 36  | 0   | 133 | 0   |
| 96adb8165d92ece7754ad98a41725faf | 0   | 0   | 0   | 107 |
| 5849eebfd648b68285ae5df4121c63e0 | 60  | 56  | 0   | 52  |
| a519cc7390e0aecbacb46959a99d3124 | 0   | 0   | 0   | 168 |

|                                  |     |     |     |     |
|----------------------------------|-----|-----|-----|-----|
| c0f247b2330dde78335a646849f8dfd5 | 28  | 33  | 14  | 52  |
| 68971f2a69103655ad3a234ff1d673ce | 63  | 0   | 0   | 104 |
| c247fc7212803d7bc7c25de822e5e8fa | 0   | 0   | 29  | 113 |
| c0337b36901068199ffb3c743743b12c | 16  | 39  | 0   | 27  |
| 7ae43476e63ab9306678e2c4c04f2182 | 0   | 0   | 84  | 0   |
| 954d8c023dadf6b31e8520451f3a002c | 0   | 0   | 0   | 0   |
| a08fec5c2d77d5850cbec52f53eabdbb | 0   | 0   | 13  | 132 |
| 945f177b9563b4dcf1b4ae2889bb2d7e | 0   | 0   | 166 | 0   |
| 7e02ad925e834ed13d434371f7e99b6f | 14  | 27  | 43  | 81  |
| 0b598cdc2034cd9a7429a9be820676eb | 12  | 25  | 26  | 46  |
| 8f5789f063df42c773970020585e4597 | 8   | 37  | 28  | 92  |
| 78981a2435f34251410f59751202bb2a | 15  | 0   | 0   | 0   |
| 3db2857b302e94a72d0364cab3c70868 | 0   | 0   | 0   | 165 |
| 020bb62e49344e6dcf074020de17228a | 0   | 51  | 28  | 69  |
| 18390e9c61c21659f2accdfb421a5151 | 0   | 0   | 0   | 164 |
| 9d63687d2d4d5f65abfe289649df69fa | 145 | 18  | 0   | 0   |
| 98cedaeb6530038a7c03909a8fffac4d | 7   | 26  | 29  | 34  |
| 91dcce095644d288aa221d5a5a006fbe | 0   | 21  | 0   | 58  |
| 8331170ce46ad3cb6a7c96b8a91fc9f8 | 0   | 34  | 0   | 0   |
| a544aabe6a8f1b00b54723b52e0cf203 | 0   | 0   | 101 | 22  |
| 21d3217f1c4e0c7e8df18e0bb27e3b3a | 0   | 0   | 0   | 163 |
| e663178e579381e314b8594dc7af437f | 0   | 0   | 0   | 163 |
| f0623a8209cfc4f6db21b77e5cc54bcc | 48  | 72  | 21  | 21  |
| 3c695e1c67fd0c62cf3d6bd94e5c888c | 75  | 0   | 11  | 66  |
| 29165cb5ccb6c18a2161a3d34979404b | 0   | 85  | 4   | 49  |
| 6b82ff87c69d2f590c87041e792ddd61 | 0   | 0   | 11  | 140 |
| 121bcb80fe4c4c8a1cd773f46723c4c0 | 0   | 21  | 13  | 128 |
| 226309f8c7d7c0eec7baf6514024730b | 0   | 162 | 0   | 0   |
| 5cbd1cfa2d92626656424ee4e51de2a7 | 0   | 0   | 0   | 162 |
| c8e482fbb5157a06ea5763f239d9469f | 0   | 0   | 21  | 141 |
| bc657d20356afe438f51e0afcd7a668e | 34  | 0   | 41  | 86  |
| a83ed00ba3a09dd1c5aa41355f44bf30 | 57  | 36  | 0   | 0   |
| ec8733e4a1cc105f395a840160c61e88 | 38  | 21  | 15  | 49  |
| 376a98bc0173475219e5b617c33dc830 | 21  | 26  | 30  | 22  |
| f5463bf3267b1bcce142124c0830e7b2 | 28  | 38  | 8   | 0   |
| eb685a0c98133501c71ea2fddf720dad | 0   | 38  | 0   | 0   |
| 1ec539e1db505e2106ca5e0a75e77072 | 0   | 12  | 19  | 66  |
| d113641e937e9b3fd14025d8031897d7 | 0   | 0   | 120 | 0   |
| 2f7b19b490094c190d07819b8c304924 | 70  | 75  | 0   | 15  |
| 6a3290fe250e7dc20be36e633b417db1 | 94  | 0   | 0   | 66  |
| e0ae421ffb2c71834cd0dcad1a9deda4 | 14  | 39  | 31  | 2   |
| da95f9bc57ca89afad387076579fba75 | 122 | 0   | 0   | 0   |
| 394d558f13184907b1c193869d7fe408 | 108 | 52  | 0   | 0   |
| bc936ea1c33fdb5f3e539a3baf975ea5 | 136 | 0   | 0   | 24  |



|                                   |     |     |     |     |
|-----------------------------------|-----|-----|-----|-----|
| e9c4784dd3616810c67e8904fa3055b8  | 0   | 160 | 0   | 0   |
| fd66827fe5175aca67301d9f187d2820  | 0   | 0   | 41  | 53  |
| 0545cec0cdfc9877f1c5abb67a7a7032  | 58  | 0   | 0   | 0   |
| 497e6e90933b529653eee3837416ee2d  | 0   | 0   | 0   | 0   |
| 355fb27c16a34c7536beb10e3e1f3b3d  | 79  | 8   | 0   | 32  |
| 41789f4f65960aeb416964098c506147  | 0   | 0   | 83  | 0   |
| 5c0bd1ac57f63c140bbd666975e8f9e4  | 0   | 0   | 157 | 0   |
| d41f18c7920d46ca39192ae8c158fb54  | 66  | 8   | 43  | 0   |
| 57b35a94b0dd42a6655db16187181889  | 79  | 41  | 0   | 0   |
| 80d8066c2855cb90ab9e3eb574424853  | 19  | 15  | 16  | 79  |
| de6fd700296bbdbf6d065da5ab9b6d71  | 0   | 0   | 153 | 3   |
| 756bf425776b4418b11a99ed1dc2e7df  | 0   | 0   | 0   | 156 |
| 2073eef8cfb7a4c7d50acbbce7c835a   | 0   | 0   | 65  | 91  |
| 67836b972343f2cd2debadc0bf390b0b  | 31  | 27  | 17  | 46  |
| d76fb990768c49e8239454f2e949152b  | 39  | 38  | 0   | 0   |
| 116131ff9407b4121b8a24c116e647de  | 0   | 0   | 0   | 87  |
| 7055a222327923cfbdf73ee5cd146780  | 14  | 18  | 0   | 49  |
| b6f9f384bab07d9e02a9e086b4f4faa   | 0   | 0   | 0   | 72  |
| 27f11883a03140c6433cf2c898939ba3  | 0   | 0   | 39  | 30  |
| e703c88953c4ec5496f52101852d91c0  | 40  | 16  | 0   | 0   |
| a9f6ed169ad4052cbf0b05d9e87ed24e  | 46  | 14  | 11  | 81  |
| 7b4d9df959b8b307a4be123f18acc0ed  | 4   | 4   | 45  | 73  |
| 64497a7a00396bcd4866773acd2dd10   | 0   | 0   | 59  | 42  |
| a570a50c777e4bf9ff6878fcb73e2bf9  | 0   | 107 | 0   | 0   |
| ccceedcebbe1f08715a62ac730ab0b03  | 0   | 0   | 28  | 94  |
| 2b4ccea6c1434eaaf0d961f609d33b49  | 0   | 0   | 89  | 0   |
| acbbe207a2b5bade58c2b4f4f37904cd  | 0   | 0   | 0   | 0   |
| 35dc6145e97da30a6f6c7675244507f6  | 0   | 59  | 27  | 65  |
| 1a379480556fdd1cb193ae0a3cfc406a  | 46  | 10  | 15  | 0   |
| c73ad1f52e6ec327e3e7751d6f8c923e  | 16  | 61  | 16  | 57  |
| 05b67a3eea5c734c1b7eb14cd940aaafc | 115 | 35  | 0   | 0   |
| e8d55151004d17d4d29b1582703d63f9  | 0   | 28  | 0   | 0   |
| 7034397db8ee956601f80c45b579ba67  | 0   | 0   | 0   | 150 |
| 7c3eb9eec7fd28bed73fb36556e82a9d  | 14  | 3   | 10  | 119 |
| 2c41369a559e1ceb0cb4fe405cae7883  | 6   | 24  | 0   | 103 |
| e332f22a365620814364c97d98e74921  | 0   | 0   | 0   | 100 |
| b9608221f51e1a95f8547c9b117bfb24  | 0   | 5   | 41  | 33  |
| 181315932a230bbc6558e2b472474968  | 0   | 0   | 0   | 0   |
| 2dd33edb1e4056859a7335f5ce65e2bc  | 0   | 3   | 96  | 48  |
| f633453da568a178fb2a7076723251e0  | 23  | 11  | 74  | 19  |
| c1132073a0a6e6ab626fe597bd9f68df  | 0   | 0   | 107 | 0   |
| 04cd7b62d8eca647cae11ad8ee33ce51  | 0   | 0   | 83  | 65  |
| 1c6c4cb57fb7a698f913faa66fe8aa88  | 37  | 39  | 21  | 50  |
| 5821d02d33af44407ffb9aa52ffcdb97  | 64  | 7   | 18  | 58  |

|                                  |     |     |     |     |
|----------------------------------|-----|-----|-----|-----|
| 3deb68ac404a0dff1305e5ec5c73bc55 | 0   | 32  | 18  | 38  |
| bdc1be55af72e9c1e689ba3e536122db | 0   | 56  | 0   | 78  |
| 6ac981477db24887fe8ea8a6960a55af | 0   | 0   | 82  | 55  |
| f656372bd2b461ffba04107874e4fa9b | 0   | 9   | 22  | 115 |
| 5869442bd6e497fd4f3ba43dfdc654d  | 0   | 0   | 118 | 28  |
| aa279c1008b2c378d3bc0ed92f90da65 | 63  | 75  | 3   | 4   |
| de0c677969ba6871ecc6e9fc4c5c0223 | 13  | 0   | 132 | 0   |
| 240f5f1f107a6a4cb666bfd1f042da   | 98  | 31  | 0   | 16  |
| 1ea38857a7410e734be6c66bacd6e5ac | 51  | 61  | 14  | 19  |
| 73ed6859fa35834967057c43647217d1 | 14  | 41  | 25  | 65  |
| b34ca943ee14b32217a0b9bbc8b895f0 | 25  | 8   | 0   | 10  |
| 50d42c09c2adaafd482e4b7baa25366  | 0   | 43  | 6   | 61  |
| 8858d26626c4f51c6153ca68c2d2f67c | 0   | 79  | 17  | 49  |
| c82caca8afcab5c7740c4e27ab00a731 | 0   | 145 | 0   | 0   |
| 0b30b916f1ec51f9aa91eefd3ff0b536 | 0   | 24  | 121 | 0   |
| 9ba88f5863f2b42558625d86318a1d82 | 0   | 0   | 78  | 67  |
| 5b7054410ac1af175be6f81c9243f73d | 35  | 30  | 18  | 2   |
| f050c824d4e4182f192f5baeb24997e1 | 25  | 18  | 8   | 0   |
| a08f13d97b498e50d02be531984754fd | 131 | 0   | 0   | 13  |
| 96ff0cbf8d5349dbff07b808e78ceedf | 3   | 45  | 15  | 70  |
| 310d042408681b5123bf6d528233306e | 0   | 28  | 21  | 34  |
| ab320ffbfb15cd952dae6d7b09f215   | 0   | 0   | 57  | 33  |
| 4ad60374f492378b41bbc5bdd5fa2b5a | 0   | 0   | 0   | 41  |
| f12ab30ac99a7c010facb0fe36a3f959 | 0   | 0   | 33  | 9   |
| 0014ce8c4a5cf2e1823216485e1e0916 | 0   | 0   | 67  | 77  |
| 43e4d794aa1bd2faa32acd13eef663ba | 50  | 0   | 0   | 63  |
| f68d9b7a447905f340b84e1f3328bbd4 | 0   | 0   | 0   | 0   |
| 74c764cd57dcb0e8dc8945a1836bdc3a | 0   | 0   | 14  | 10  |
| 039be2122317c7eb1db6aaa3d4e07d9e | 0   | 0   | 0   | 143 |
| 9547178ab221d3d96bd0f30b8b482c20 | 28  | 71  | 43  | 0   |
| 6d4b57fdc66733600bf40813dfe81303 | 12  | 0   | 13  | 64  |
| a6d09bdb8e36d23b5d242be84d2ab093 | 24  | 105 | 0   | 13  |
| 11356ba3c061f8b1b6b77308e440fb4f | 0   | 18  | 24  | 0   |
| 4dbe3bdab41aeec79e52c78c1281615d | 0   | 0   | 37  | 92  |
| 14087edd62841a22391d13380d07c88b | 0   | 0   | 13  | 129 |
| 407cb1a5b90da56b51d4f1ee8cb29c2a | 93  | 37  | 0   | 11  |
| dfe9ac7365cdf0edb64d506788848c68 | 22  | 7   | 0   | 0   |
| 777160c7e0c4cab4dd12365a401b814e | 12  | 15  | 17  | 60  |
| b0360b32f913835b6df94a7e48872cc9 | 23  | 0   | 79  | 13  |
| 21e0a14395e42741c7099ddabc7d5cca | 0   | 7   | 0   | 0   |
| 35b6846c4dc0f02655e27f53219d6f65 | 0   | 0   | 10  | 0   |
| 2cf3be72cdeef8cc3784d4d9ce1e716  | 0   | 0   | 0   | 0   |
| f78313332badcc840ab0b5b59e401b06 | 0   | 41  | 0   | 61  |
| 1e71ac7983719c467be0e0a3d6979e8b | 39  | 14  | 44  | 26  |

|                                  |     |     |     |     |
|----------------------------------|-----|-----|-----|-----|
| 16aab4dd7552f0cc504639b7db064632 | 0   | 0   | 58  | 0   |
| 1d3d0b6b9aa3a493adc1656428fcf8cf | 0   | 58  | 0   | 77  |
| 14b3c217a2c811b21e7b968e99a94767 | 0   | 40  | 19  | 0   |
| 1b3faff8061f92213655b10505e33285 | 90  | 0   | 0   | 20  |
| 575037da2eda0f9dda9e70d41ebd71c8 | 96  | 42  | 0   | 0   |
| 775f425f6507b0578bb71956fec635ee | 65  | 0   | 0   | 0   |
| cdd9ef18ab8b153359586a090d2579b8 | 30  | 0   | 0   | 77  |
| 69bfeea4f30b074791b47b62d0886f4c | 0   | 0   | 0   | 138 |
| e19a01e016f7d7ee4de4b2c1aa6d5fb4 | 20  | 64  | 3   | 10  |
| 2ea63effcba3ce1cb32ad001e8798d89 | 24  | 0   | 55  | 0   |
| 4f5849ab1c818540c3e36aa5fcacc92f | 0   | 36  | 70  | 25  |
| 01c4f4353658851a1b43270cd38c28b2 | 24  | 0   | 107 | 5   |
| 7a87a97cd2ef555945b97113ae6b8c20 | 8   | 25  | 0   | 0   |
| c910b6e37ff633d88cc56987ea7bebc0 | 0   | 0   | 136 | 0   |
| c3c6d35f769d22ac6f7c0fd2e63c3f67 | 0   | 0   | 38  | 81  |
| 215819e2817d48d1d5b399588f183bcf | 45  | 34  | 0   | 0   |
| cec31782a0618bd49ca08d85c49bde08 | 0   | 0   | 29  | 105 |
| 805d371f3d97f5cb72c10f4460d013d9 | 25  | 15  | 0   | 0   |
| 1920c4a194d9f7a13c84dcbf30743d0b | 49  | 36  | 3   | 0   |
| e919228bfbeb8018d9ecde2a0c74b22e | 23  | 8   | 71  | 31  |
| 286d4969874789c9526604e47de8c0f5 | 7   | 78  | 3   | 45  |
| 4b01aaf57b7206baf136b2ae78dc9a64 | 0   | 0   | 0   | 0   |
| 6275232859afe8b494443be36b77575  | 18  | 20  | 0   | 0   |
| f9433c8e39e84beddb049b114b6c219a | 74  | 0   | 26  | 0   |
| 253d70249b63aaf510919e4006a24d82 | 132 | 0   | 0   | 0   |
| 34d660096799b5f6996e684102e73cb4 | 0   | 0   | 0   | 42  |
| f847a8d9658741799711b687d5fb2024 | 0   | 0   | 0   | 75  |
| e90446fee15feb39a6b6b5238a5caa4c | 0   | 0   | 11  | 0   |
| ea06f91f17bf8df53e748a24bcd6c23  | 0   | 0   | 0   | 121 |
| f6a8fbd1d62363cd09c4408b99c2dd42 | 0   | 0   | 0   | 132 |
| 048ab69a3a0dc3742632ddbde1ec112  | 15  | 5   | 41  | 19  |
| a5caeb88665b76e5d62372b0d2bf461e | 8   | 115 | 8   | 0   |
| ad5413e8a49d70063c2f406fca7f0950 | 12  | 14  | 13  | 92  |
| 2df3385b37d73b0e13fc630defdb8469 | 0   | 0   | 11  | 116 |
| 65d9a20cf74df5de24068222d1c2c537 | 0   | 0   | 116 | 0   |
| 37ca10424bf8e84840b7c8e345145c1d | 0   | 131 | 0   | 0   |
| 81b7ed5c71dd482b039b50cc55db60ed | 28  | 12  | 10  | 80  |
| f576fa5204d4488f4981abd96a58f6c9 | 0   | 0   | 83  | 0   |
| a88d313b5708e3cbc187d70361a7ad76 | 0   | 0   | 51  | 66  |
| 41b23def2cc63379510573de502ce315 | 0   | 15  | 74  | 41  |
| 6ab76bbe57c0ebe6076b061d4820fbb7 | 0   | 0   | 33  | 97  |
| 77b658a35fe33838a99ea64a67fc4013 | 0   | 0   | 0   | 130 |
| 067ffc33bf0f188b971083ac1df0c0a1 | 61  | 56  | 5   | 7   |
| f462e6efe5a59ef874331772b91330dc | 30  | 21  | 10  | 64  |

|                                  |     |     |     |     |
|----------------------------------|-----|-----|-----|-----|
| 33be0bc4d2dfbc3412917a9cd88073d6 | 34  | 78  | 17  | 0   |
| e6ed36974536b9dd115f1a1a00248a7b | 0   | 0   | 0   | 85  |
| 83b8cf7295e51d5ad601f4f4861f3470 | 72  | 0   | 20  | 26  |
| a8efafd7cb358f74c8153e26f95ccfed | 105 | 0   | 0   | 0   |
| 055068d06de01a328e2b4fd377f73554 | 0   | 0   | 87  | 0   |
| f5922d7dc0cd0a1eb29865f05e52d4c7 | 0   | 115 | 0   | 13  |
| 9794614b8d1a145a1883973c80981bb8 | 12  | 16  | 34  | 44  |
| 7d91203f175430765f14b752bd19c7b3 | 15  | 31  | 20  | 0   |
| fdff2e0437f1eca73dab1321ba2189d0 | 92  | 14  | 0   | 21  |
| 321c2bc0277ba5617d68b6bfd0c0e80e | 2   | 0   | 39  | 77  |
| 30180f675d7e25c93ad0773590bf820e | 0   | 42  | 10  | 0   |
| c1c6c2cdfa12644e4e569fc34d7eb6d4 | 0   | 0   | 0   | 0   |
| ac844672da79dd440a7c5f321bda781a | 0   | 0   | 34  | 59  |
| 368334321aabcd1de36e943c8fe874c  | 0   | 27  | 86  | 0   |
| 3d35579b89c602d0a020f32080a038e6 | 0   | 0   | 0   | 127 |
| 67e2639e02c35871acb1abc2406546c9 | 11  | 0   | 19  | 14  |
| 33efc9f3dd1fb65a4981d4bf2a52ba71 | 74  | 52  | 0   | 0   |
| 240769d106d037a2f17b43f4cb164029 | 5   | 121 | 0   | 0   |
| 787aa0c4360214fe6509c13cdc6cb695 | 0   | 0   | 30  | 59  |
| d43a2fa8ada740fbb2ee21ddeeaefec6 | 0   | 0   | 0   | 0   |
| aa70a2f98bbaee18b7a7dd6c844006f0 | 0   | 0   | 31  | 30  |
| 23d174f1d01e3ad4a840733855392763 | 0   | 0   | 0   | 66  |
| 11c9005b24dd1f2358cdedb11618ef76 | 0   | 0   | 32  | 0   |
| f9b9dea06a99e887a2ed60e81a310e94 | 0   | 24  | 32  | 70  |
| 461dec428db571843a060f42fa766d8b | 111 | 0   | 0   | 0   |
| e6f16d4e1a52bc56ea3c44fabe2145d6 | 0   | 0   | 113 | 12  |
| aedc4ff75f26ce9628661a141dad4c88 | 0   | 0   | 0   | 125 |
| d0ab2c15400fe710288526c9a33083fb | 101 | 23  | 0   | 0   |
| b557781f2e9948742f2e4ea3f8b8d26d | 9   | 23  | 11  | 51  |
| 0e9679c124f5029642cc42cd92bbe25f | 0   | 68  | 24  | 0   |
| 57444bc83e1015847af7f763b0c75292 | 0   | 14  | 0   | 91  |
| fd9276855a6e35641fbbd068c02a817b | 0   | 9   | 42  | 67  |
| cd8c9082a465792f66bac7df6fbfab16 | 0   | 0   | 30  | 49  |
| 0064c3bd554b6d97676edb9df6dae9e3 | 0   | 66  | 0   | 0   |
| 6512f7a2235b4c1e39b8aa08e47b5123 | 0   | 18  | 106 | 0   |
| 3791234d8b51db26d2b793af042c2a4f | 63  | 0   | 11  | 0   |
| 3693c79ffcfc742ac7cfb98caac6d09f | 52  | 0   | 0   | 71  |
| c784d8c5246c9efe3009b6dd5020b616 | 0   | 0   | 0   | 123 |
| fd48bb8ed836d51c3e521b239a3c56ed | 66  | 21  | 0   | 14  |
| d2c8c2fcce89387c481b305db65b72da | 9   | 113 | 0   | 0   |
| 52512c1a668d738eb5a044603a0ab27a | 16  | 6   | 0   | 3   |
| 70052e8a4ce116152a157bcbe99e218a | 18  | 0   | 0   | 74  |
| 8e061ba91f458a8ebc8209511ac67bbe | 18  | 95  | 0   | 0   |
| 37aaf7484d82316b999ac6c5a122fb26 | 0   | 19  | 24  | 25  |

|                                  |    |     |     |     |
|----------------------------------|----|-----|-----|-----|
| 1059caac25678477dc2c2d5cb490c516 | 0  | 0   | 0   | 103 |
| d52b127a0c9328de8935738a3905a757 | 85 | 10  | 0   | 10  |
| b463d89446139068241fb1b68430aa15 | 11 | 0   | 70  | 32  |
| 2cc6b28ba52c1198d85fecfba4129e26 | 46 | 16  | 0   | 40  |
| 87b963ca24734b509839c5727b8a0833 | 0  | 0   | 22  | 0   |
| 5134ff14bd90222bee5e68a7237d5883 | 0  | 49  | 0   | 7   |
| c4f3bddbed6c567d0d4c9e68de857f2c | 14 | 8   | 14  | 77  |
| 890b99ef903d700088f3db4c7474d7b3 | 7  | 50  | 12  | 29  |
| 8df3089174baa460a2ebfc39fdb3c178 | 61 | 50  | 0   | 0   |
| bcaf8196fc030f8600ba6c846548c3d3 | 26 | 21  | 14  | 49  |
| 4a2c630f5e7fd6293fa7ee5be3ba4535 | 0  | 24  | 62  | 15  |
| b8ff198bdd81f1517c88fa7cb640d0ba | 0  | 3   | 93  | 22  |
| 103baa4491d0a4b55ae59f19abe37318 | 0  | 0   | 15  | 105 |
| eb5f6ddb94af793146d269835dd4d53e | 0  | 0   | 120 | 0   |
| 3e93ed9816561bd10d6a48c60f1c3630 | 94 | 0   | 10  | 15  |
| 2f01ef24aad463019b8ad9e27202d529 | 44 | 37  | 0   | 27  |
| 9f22da56e873ade2c09013cae621e715 | 9  | 19  | 30  | 24  |
| 86b3c8121b8d1951355ff5febc79c4fe | 3  | 0   | 35  | 76  |
| fd45859fc4f4e8d4534e8669da8dab34 | 0  | 38  | 31  | 0   |
| 56441de9ffa89ba5a5e002bb0fe3e20b | 0  | 52  | 0   | 67  |
| 7e032c522ec02eedc5dc575364b17f64 | 0  | 0   | 69  | 50  |
| 0efc9b17dd3102279dd5b3aa5b964b0f | 19 | 0   | 86  | 0   |
| 6a2bbb4ce921d823150552ec49db79b7 | 0  | 0   | 50  | 23  |
| fddfea77c3a16862dc254e6644cd2fd1 | 0  | 0   | 0   | 0   |
| 73512cbbdd53abc6618b8c3751700034 | 0  | 19  | 4   | 75  |
| 2edea37ec213b917b66e717b54f176c9 | 0  | 0   | 0   | 0   |
| 550d879a43e4caea4c8463398d98e83a | 0  | 118 | 0   | 0   |
| a15851ba55e0246411bf14e9e673dc08 | 0  | 0   | 0   | 118 |
| da3460c8428aef0ec423c48c99b6f63d | 85 | 0   | 0   | 0   |
| b29f2cb7e1bb24f182bd68aaee6cced6 | 25 | 36  | 37  | 16  |
| 6f9be5bd87cc3b812a03cbac7b8d534b | 0  | 117 | 0   | 0   |
| e67be099b13ae8978967a1e49e610f47 | 0  | 102 | 15  | 0   |
| 398cb0123c14eec39e6c368b8140d427 | 0  | 0   | 77  | 40  |
| 04df3d880e04321ff78f2ad676d859d5 | 11 | 0   | 83  | 22  |
| 6401db0f98251283c2132507c3a0b705 | 26 | 90  | 0   | 0   |
| ed5a443c2474583d3d73d76dace97d0f | 84 | 0   | 0   | 32  |
| 7f778d82debd92b68f3ee6462aafa815 | 0  | 17  | 79  | 9   |
| a832b514f9afb0ac8d20244705d9fec  | 0  | 0   | 0   | 66  |
| 3c9c786d85efc8fec1475ddd4ee04a41 | 0  | 0   | 0   | 116 |
| 43ed0ad10c67ad6f10b2893f07742d22 | 0  | 0   | 0   | 116 |
| fa07a3a3b98b7732058a328122ccb57  | 97 | 0   | 0   | 0   |
| 1f9af3dfb5fbb95633114889fc9c9cfe | 26 | 73  | 2   | 11  |
| b3e426fbcf5bcc5a2464f3308e20ac3d | 0  | 0   | 24  | 74  |
| 63f1cde6c46ae6a33b9588c96b5565e0 | 0  | 0   | 59  | 56  |

|                                   |    |    |     |     |
|-----------------------------------|----|----|-----|-----|
| 84d1a8c7e1bb523829e3322efbd36ef4  | 27 | 11 | 26  | 41  |
| 3f5509da3dc3f45151cdd44be14a363a  | 52 | 37 | 13  | 12  |
| c1674bb17dae4b3be5a10370f17944ab  | 99 | 15 | 0   | 0   |
| 5b34f7bc6c322d723e59cad420889874  | 64 | 40 | 10  | 0   |
| 88882782a23d25cc49cad61a65ee8249  | 0  | 0  | 0   | 0   |
| 24060e4695b8053f4b70ea834de95ca9  | 0  | 0  | 91  | 0   |
| c7dbaa5fd996113f7e5a0c8db82d74ca  | 0  | 4  | 48  | 52  |
| 867a8de8adb06c8b4aeed43d7b8be18   | 0  | 0  | 0   | 114 |
| 4682e5d677f351720776a995c50376bd  | 0  | 0  | 86  | 28  |
| 84c7e05e2c72b8b9145bd06f415adeee  | 83 | 30 | 0   | 0   |
| e71e5135f6ef63b3e08ae30c4886c19c  | 83 | 30 | 0   | 0   |
| 384255998219abb1b0b537274d0e9478  | 35 | 27 | 20  | 3   |
| 86393d2378d611e8231b0e6893aa0740  | 4  | 64 | 0   | 38  |
| be1680b9d2299539aa9a38f3f4b8a39e  | 0  | 0  | 79  | 0   |
| 959b75f79b7491aceb1bb584a4b4111d  | 2  | 0  | 17  | 77  |
| 6e24b3e21068af34a6f124cef13d143c  | 0  | 0  | 0   | 15  |
| 9fa1e7c38e5a1a37335223754c660a2f  | 0  | 20 | 0   | 92  |
| 778536c794e40d46c69148ff0690597a  | 0  | 0  | 20  | 92  |
| c50a1469e01686fa7eb77214945dff00  | 0  | 0  | 18  | 94  |
| ffb6f62cc520a3aed3eefca85ee664f2  | 51 | 0  | 0   | 0   |
| 1121977c3f830f25a4aecf9f80a48907  | 40 | 7  | 29  | 21  |
| adb4ec8e0827cb59f8691c6237c8e504  | 11 | 22 | 51  | 27  |
| 8e9a932a357fef95dfac7bad74843b9   | 17 | 84 | 10  | 0   |
| 8cc968aae3027ba33bfffb0f3ae58e279 | 35 | 0  | 14  | 62  |
| e86596e0c296fe54da0401711ab1967d  | 0  | 18 | 21  | 22  |
| 4b30f3ba249add0a9e1780252df7ffd9  | 0  | 0  | 67  | 0   |
| a5742a868f99d2523aee4b227f8afce0  | 0  | 0  | 102 | 0   |
| 9b634e0df903841601e6cec684759c62  | 0  | 0  | 0   | 43  |
| 319e2bab3536e36116fe2ebd53df53a9  | 0  | 0  | 67  | 44  |
| 6b46b0e67ffc5c72481c8f21360cb53e  | 0  | 0  | 108 | 3   |
| 85b132e44d34ac4c469758a7a6eedc2a  | 0  | 0  | 0   | 111 |
| 40db79b650d8f39776b18a03076cc8c3  | 51 | 26 | 4   | 0   |
| f2c07d9fd556ec318ca359e966705981  | 26 | 8  | 30  | 11  |
| 0e09c9ae0c55a7ed6d6b140a1942bc18  | 36 | 35 | 15  | 0   |
| e2c9d7c83f009880bdfeea2c83e20cdd  | 42 | 39 | 0   | 29  |
| e3c17531cfc2e39cbf2933819f216853  | 0  | 0  | 63  | 47  |
| 27e53dfbe43add1eacc3b1f6608e88ff  | 21 | 28 | 29  | 26  |
| d49633c3ceee6fafed766fbb5bfeb7c8  | 67 | 0  | 16  | 11  |
| c4b7ca2e4355b31a4e8481b469df62ae  | 37 | 0  | 72  | 0   |
| d1f1bfebd3b7a4a36c6581a1c3784a9d  | 63 | 46 | 0   | 0   |
| 9c8694f7a116ae67576d3a30c9f340b2  | 0  | 0  | 0   | 109 |
| c4adc77232530a7fbf9bdb62e7509d7a  | 0  | 0  | 109 | 0   |
| 90317e60b4bc96b2fc5e12a9ea180407  | 17 | 22 | 28  | 37  |
| 106ec72d34d9ccf652cd664a222a06b9  | 26 | 18 | 14  | 28  |

|                                   |    |    |     |     |
|-----------------------------------|----|----|-----|-----|
| a006a30857fd12f2ba49e4724e99ce03  | 0  | 74 | 0   | 0   |
| 475b54a9e68fe2931456cb5ea7367cf3  | 0  | 0  | 67  | 0   |
| 526efed7d9ab6ad5066b512aa55a27d1  | 0  | 0  | 68  | 40  |
| d47fc9cc15508cb28cb4c53494b9ddd6  | 0  | 0  | 108 | 0   |
| 6fe0b3ead44a3813dd2f5dd37d4d0120  | 68 | 39 | 0   | 0   |
| d212f53832713f34a3646996ca4be0e8  | 99 | 0  | 0   | 0   |
| 753fcb4e5617af95a55363d710690c9c  | 41 | 48 | 18  | 0   |
| f159227d83c490f744685a5aa070f003  | 17 | 40 | 41  | 0   |
| 8665e32adb37215d1e592fe81d5a60e   | 4  | 20 | 6   | 77  |
| 521e9f627774be9e12e0ff871bab15bb  | 0  | 27 | 38  | 21  |
| bc762ab4a38e1cef38982e268bda9d3f  | 0  | 0  | 36  | 55  |
| a8c074da50bc18c95abfca4864645273  | 0  | 0  | 102 | 3   |
| c28ac84cca39503c4984afadb7f9921f  | 0  | 0  | 67  | 40  |
| 44cd3b3a2bdafa5235b45c33eb29e7697 | 0  | 0  | 84  | 23  |
| a9267a35f452dfad4bf192741d086cc6  | 13 | 63 | 8   | 4   |
| e79929f0a252a52cfd15d5d7cfa58906  | 14 | 5  | 0   | 87  |
| 82969e80eee58d4e0bda3de351e1dcbe  | 17 | 7  | 31  | 38  |
| 2fc4ef99c24aa5b54d15e4d4e5348400  | 0  | 28 | 0   | 24  |
| 5843b6f3b3b2f64a1b2192548fb93bce  | 0  | 0  | 13  | 44  |
| 4734a28db3087dbc8273ed913fc15f9e  | 0  | 0  | 15  | 46  |
| b7ee2239d659ec0d8a257624b1f99ab6  | 0  | 5  | 64  | 37  |
| b45ace7dcfd22c27638af1b8b7efcbea  | 0  | 48 | 0   | 58  |
| 812caa3e5bec3f9c5a51c330fbed4628  | 0  | 0  | 0   | 106 |
| ed93f56440e924e3051071709583c0f4  | 15 | 0  | 0   | 90  |
| bef7ef7defd6464d1b5e111e95238876  | 99 | 6  | 0   | 0   |
| f206555eafc61984957da62a677ffa66  | 51 | 0  | 34  | 0   |
| 61e5faef4de1da58c7a5e9a2680d1e2b  | 62 | 19 | 0   | 0   |
| 00f05627294d11ec9c25c9455e2c47eb  | 19 | 26 | 41  | 19  |
| d93a12e3bde0fbd7ea9774746cb817e9  | 5  | 25 | 18  | 29  |
| dba5e4cb8840a312cbe60925bd93ef41  | 0  | 7  | 0   | 0   |
| c217003cd96026747987c61c14b4eb50  | 0  | 41 | 0   | 21  |
| 97446c6809a1e982b64a2443ab0851e3  | 0  | 33 | 0   | 72  |
| 1a57dcfa1a2b56881cd5298976c87b57  | 0  | 0  | 0   | 105 |
| e3a797c689102bfa945dadfb958316a2  | 0  | 0  | 0   | 105 |
| 8f17ca772f951a71f996cc1efe210c23  | 0  | 0  | 105 | 0   |
| 20c45b51dd0114c31adba0a92edf5415  | 70 | 0  | 34  | 0   |
| 36d6900e9062a957a491889b4b944a10  | 48 | 56 | 0   | 0   |
| 12ad74271a11dabbd07031709a0205ff  | 44 | 0  | 0   | 0   |
| 2c6681bf449befb6e72364adbc6c62c3  | 0  | 0  | 0   | 55  |
| 6e19d665dd3a5a2b0c23898a7d79bded  | 0  | 0  | 0   | 0   |
| 81e52fd12aa5409ddd1ad7157c849aad  | 0  | 0  | 0   | 0   |
| e654dc21835a95e6b64081a60c136a0b  | 0  | 0  | 26  | 78  |
| 9eab7e2a0cc24bada42d37e53ef8ad17  | 0  | 0  | 0   | 0   |
| d070317aeaea91028031f204c5323bc   | 0  | 0  | 0   | 0   |

|                                  |     |     |    |     |
|----------------------------------|-----|-----|----|-----|
| 02558bf471e6056e2ac602a81a771490 | 52  | 0   | 0  | 0   |
| b543e68e100b0e78a9870207a3720651 | 102 | 0   | 0  | 0   |
| 1c3f9168e2c6228dba13354612b50f11 | 18  | 14  | 30 | 27  |
| d7463dce1ab4db9cf8f134047723bc85 | 33  | 22  | 28 | 3   |
| c54b82f03602dad5fa67d7a9926740b7 | 13  | 8   | 0  | 60  |
| ed33772a1caee90939081a3385e863b9 | 0   | 16  | 18 | 21  |
| c9383085d0c95d497cfa10d591f764ee | 0   | 0   | 56 | 43  |
| c805a491fec2913733fc8acffa7dc9e4 | 0   | 0   | 34 | 25  |
| 37d920c33fe188238fb284b329a3339e | 0   | 14  | 0  | 77  |
| c495699dd72fcdc1033566ba6f66bae3 | 0   | 0   | 0  | 60  |
| 17c52ae5f1159ad9462f430130e84aee | 0   | 22  | 19 | 61  |
| 5a7cf6a13aaf68f99fc9ceac3b721185 | 32  | 0   | 0  | 59  |
| 75747507cb4316f7298d712748f33745 | 29  | 13  | 18 | 14  |
| 5b2b8c654eccd26ab80eede49d8a781e | 21  | 0   | 0  | 80  |
| 100e4636f491ec36b6d809d3698d66a6 | 0   | 0   | 16 | 0   |
| 70803e09f38833f21c4eb24e56228349 | 0   | 0   | 39 | 34  |
| b66b47bb11b1ad985968bea3ee8b1853 | 0   | 101 | 0  | 0   |
| ba2ab6e2ef4d6fdeb96e3f8efe90d67c | 0   | 40  | 0  | 61  |
| 7297b6c8e49b3830683e1959b56b6353 | 0   | 64  | 37 | 0   |
| c6b395626902e074aa41c4cb3aef9c7f | 0   | 21  | 69 | 11  |
| f6869267e4de9d6422e10e9d3375754c | 0   | 0   | 56 | 45  |
| e8e4203ef341d1f2fbffb72c4d7158b9 | 0   | 0   | 41 | 60  |
| 8f3eff4ecfddac468aec89f415103256 | 0   | 0   | 0  | 101 |
| a35e945b2fc8f6da8f70702bb591f037 | 5   | 6   | 34 | 39  |
| 155273d0f89ce9fdab4906ead9a87b03 | 29  | 7   | 10 | 44  |
| 07564129a978fb66a9f81d8887444acc | 52  | 32  | 0  | 16  |
| e06fb82230285ff88fafd691bd276990 | 0   | 9   | 86 | 0   |
| d9d2afb5164d6da5a20ad06106365dac | 0   | 19  | 70 | 11  |
| 2b159fb6e1cba0eb5cea73cc631a8205 | 0   | 0   | 34 | 66  |
| 86e6d2b90bf0e767f75d39306d201105 | 0   | 0   | 0  | 100 |
| 0f6d46c70548d4ce709802b6e3162f6f | 58  | 4   | 20 | 6   |
| 7441c1411dc6070b4dbfb89680c5e070 | 68  | 17  | 14 | 0   |
| 62e8ef34911f34dbf32c7daad95d7ff1 | 20  | 10  | 39 | 8   |
| f32701450903796a2bd1c1512cc470e9 | 0   | 0   | 0  | 0   |
| d791de175c71ddb6351ec24550b7e7df | 0   | 0   | 0  | 0   |
| a498d907efa63257e5606c14755b247a | 0   | 0   | 0  | 99  |
| db0d74e286b2843fa7bbbb1855b04bd  | 0   | 0   | 0  | 99  |
| ea8cdd4e1cafdef1459b2ff29caf33d3 | 0   | 0   | 50 | 49  |
| c0025a92c5cdc680d9d62e3fbf42b29d | 0   | 0   | 0  | 99  |
| 7ea18de9b1e9f7aef23c439133a86070 | 16  | 0   | 30 | 52  |
| 0194fab3fadd6b33b615c8fbdf5cb2c2 | 0   | 36  | 0  | 55  |
| 94893124b7f720d1cdd4c920be6da315 | 0   | 0   | 61 | 31  |
| 3762d04d259856ced6078258e4161027 | 0   | 34  | 44 | 0   |
| 93e521aa7edc3418a45769d472b0fe41 | 0   | 0   | 25 | 73  |



|                                  |    |    |    |    |
|----------------------------------|----|----|----|----|
| a54149fd5a3418f3401b56a62bbd336d | 0  | 0  | 0  | 98 |
| 4303b62f2e51d673d81303f585bcb1c5 | 25 | 24 | 0  | 0  |
| d6df1c53c3f3e9ed57afc154d28f4526 | 46 | 20 | 0  | 31 |
| 78580a8b670cdd0b768e1c41140b7ab7 | 9  | 0  | 0  | 88 |
| df17811d9c448bce4e0bf5d97a847f8c | 0  | 15 | 71 | 2  |
| 7763bc1d7c0b388acc5955e7ac6bce25 | 0  | 0  | 91 | 0  |
| a476b4ed5dc5a99317d578473088daaa | 0  | 25 | 0  | 72 |
| 6226b03df8099ea48fa07eadece22ad1 | 27 | 18 | 13 | 34 |
| 0c2f560d8cade66686bdf7d7d51ee1dc | 96 | 0  | 0  | 0  |
| bc933fff4fca67337cba5fb9318ae97d | 45 | 0  | 0  | 0  |
| ef261d25627173e3af6a68108c7fa30b | 28 | 18 | 0  | 50 |
| 7f9dd7bf8507043217d58ce6220f2737 | 2  | 0  | 13 | 70 |
| 6bbd14a274016bb3abc996f495467117 | 0  | 0  | 0  | 0  |
| aa9bce70db129cd2501fa7a864187b71 | 0  | 85 | 6  | 5  |
| d06951c9ca56767a61672280d2ce0711 | 0  | 0  | 11 | 85 |
| 13f553d8f0cfe805fb59c1d1737e085a | 18 | 0  | 5  | 65 |
| c28ff5fd8ed010b377dc3bac0d7c4322 | 95 | 0  | 0  | 0  |
| f98842c6a7651bf3a731bdc78f387780 | 58 | 32 | 5  | 0  |
| c553954584284a5440f937cc4c250f4c | 0  | 24 | 28 | 39 |
| 092d2ffc44defbda4a2d97cb54535806 | 0  | 38 | 0  | 57 |
| d0a69d62d4a60f575ddf22e40938c500 | 0  | 0  | 0  | 95 |
| 82501e7cf67fe75a8de833e0acea13c5 | 0  | 0  | 0  | 95 |
| 164b0d1110064a7cadd8098dcf7f5aaf | 0  | 0  | 0  | 95 |
| c367610f06e15b9e849785b731a0d254 | 0  | 0  | 34 | 61 |
| f31ff17476159e2a0d80bc116bb71adf | 75 | 19 | 0  | 0  |
| b43d06d1b280a4ac668b3048fd39d864 | 16 | 6  | 16 | 56 |
| 8d4559e6777db6f1b343d0a4651d8d08 | 31 | 52 | 0  | 0  |
| 9e3abcf1cf209b142cf76d9c6d4fda1f | 3  | 91 | 0  | 0  |
| 160a29c5849e9ddc2b547265a3da685d | 0  | 25 | 31 | 0  |
| 25d1296f42979a80b68b1b77f656f80b | 0  | 0  | 0  | 0  |
| 0724244627f5ba784910c0bd7d04c579 | 0  | 0  | 28 | 44 |
| 2912b76ea0439a48eedd06e3e74159f9 | 0  | 27 | 2  | 65 |
| d22f976dd135c909333b7dd0d735e803 | 0  | 0  | 45 | 49 |
| 8a41a57a7a7c6072d417148e19b2b1bb | 41 | 52 | 0  | 0  |
| d5fd07413c9a5b620aa5c5a24a4914a4 | 22 | 12 | 0  | 0  |
| 8ce1c0f8d097b3452a5e6651d945848f | 10 | 14 | 16 | 21 |
| d1e17895f71d2bfddf59b3675ab2cb18 | 0  | 43 | 14 | 27 |
| 38445b4fe8abe0370ac967478bfe6775 | 0  | 0  | 0  | 0  |
| 1130c5dbf90d13bc2d2e9a12610b6e44 | 18 | 0  | 10 | 46 |
| 34e33fba3d25f707d47f3dbeafe340b3 | 61 | 0  | 5  | 0  |
| 8ef7ab47c87d40890428073983c30cab | 0  | 0  | 36 | 37 |
| 55debfd9fd34ef9d8f481fecb90ae441 | 0  | 38 | 0  | 0  |
| c5ebc7db5ef30525653a0d58f94bf471 | 23 | 16 | 0  | 0  |
| 39a4d46548ffe1f6d1fd35e751717b4f | 19 | 8  | 22 | 5  |

|                                  |    |    |    |    |
|----------------------------------|----|----|----|----|
| e21a6173d0e42ad1ca288182e53db5a4 | 8  | 0  | 45 | 38 |
| f99cd2a663a7369f63fa2d1be18aab3b | 0  | 0  | 0  | 0  |
| fbe5acb6b9bb4b5814dc6d7ca78616e0 | 0  | 0  | 82 | 9  |
| cae21ef84527ab6595f581adddace5f1 | 0  | 0  | 22 | 69 |
| 9ad864a1e8e5cfb2e0a1dbb80ffbc4b8 | 28 | 0  | 0  | 0  |
| 871de4f70631684a1e0ff2cfd75e2b61 | 4  | 7  | 74 | 5  |
| ac94ed7a6850e1035665228a400efc07 | 6  | 8  | 0  | 17 |
| fdbd997086da285c641b9dc272f3915b | 0  | 0  | 47 | 0  |
| b62fd07e2c96423bab395852c88fb147 | 0  | 3  | 41 | 38 |
| 8a4a975e46fb762774cc0afaf5588cbf | 0  | 0  | 43 | 47 |
| e629338d9365eae6ee60042d118b99fe | 0  | 0  | 16 | 74 |
| 942b6852ddadc7b72464d7e18c3d1219 | 25 | 38 | 0  | 0  |
| 5a12e642e5c3c77b3c2ca60697794368 | 6  | 0  | 5  | 68 |
| ecb99646229ac416c506683afcd8814f | 20 | 0  | 62 | 0  |
| 2a28815bf966386614307bd0a153ab8f | 0  | 0  | 16 | 0  |
| 194a2c0aebe478f53f7e8ac50c03b1b0 | 0  | 0  | 13 | 72 |
| 53956fb11c89be815bfce8d40370905d | 0  | 0  | 5  | 35 |
| c5468b67b443b576df11409827f11fa8 | 0  | 0  | 26 | 63 |
| 7c8aad293da7e58636a0a51f0a351eb0 | 0  | 0  | 0  | 89 |
| f0bde2f54893276b9ba2239c532b706a | 22 | 34 | 0  | 0  |
| 555aec664bb5db607a13ee3045941207 | 21 | 14 | 29 | 0  |
| f97c6895a70e930de8ba0e96aa8d1151 | 14 | 13 | 10 | 26 |
| 21be7e5b92f7c185e2ec57f353f7d66b | 9  | 9  | 11 | 16 |
| ac68bcf566da11c0f3b94cd9075aba43 | 33 | 0  | 0  | 0  |
| b40f14c2c9730e5116626c9350d0d95d | 42 | 46 | 0  | 0  |
| e0ea93aaca1909a262c9ae2635cdf961 | 0  | 15 | 16 | 39 |
| 5d6cf99d6e9ec1c04ee89a2b95d0c3a4 | 0  | 24 | 0  | 44 |
| 0aadfe9eab9bee469432446f9de5686d | 0  | 0  | 46 | 0  |
| 2d8382265a1dcf43e7c06f540a92a0bc | 0  | 17 | 0  | 0  |
| 39287bd81a08a68aa720e3216b84d5ce | 0  | 7  | 74 | 0  |
| 1372263840c8f886e84b352addefc592 | 0  | 0  | 0  | 0  |
| f87e1c05f4499df1067a0a9b93a84244 | 0  | 0  | 0  | 0  |
| 16ff160d588aaff8d81bce14d050ac0f | 0  | 0  | 52 | 36 |
| 52010a5648fc2ad8005c9e53c42188fd | 0  | 0  | 0  | 88 |
| ffd780436e2613584f49d2426170c06d | 0  | 0  | 46 | 42 |
| dccb043a19a42a18949c15fa559ef495 | 44 | 39 | 0  | 0  |
| 697a4081d36f0cd3d75cf67fb8165aa3 | 19 | 63 | 0  | 0  |
| 502aed2120b470dcb92406425fc94ef1 | 60 | 22 | 0  | 0  |
| 1a8964e4ce5a0f22f7ec8980d619506d | 0  | 0  | 0  | 0  |
| 9e6b9e99e8b594798f9ffddebd6b3729 | 0  | 10 | 20 | 18 |
| 33c4b39b262ba0e254b918e634594943 | 0  | 0  | 0  | 0  |
| ad865ce905398a9f4d324037988b4f14 | 0  | 0  | 0  | 0  |
| 44e0f6c05a9b86af26969d886a45a25d | 0  | 0  | 0  | 87 |
| 98f959b3feae53ab498995e2aa27e5fd | 0  | 0  | 0  | 87 |

|                                  |    |    |    |    |
|----------------------------------|----|----|----|----|
| 25fdb4e451c45c057ade2dc614e10f35 | 64 | 22 | 0  | 0  |
| bcd6f7b40f121836b20d82fa44d7716a | 60 | 22 | 0  | 0  |
| ee0d083eef8ae955b6d0df95c010ef5b | 39 | 11 | 5  | 23 |
| f241f0b28e43207a115af62a98bac8bd | 18 | 16 | 52 | 0  |
| 10bde6650a0c547e1288b4a5971dd57b | 5  | 0  | 28 | 53 |
| e9616da2db8438a4449b605d41bbe6d2 | 0  | 11 | 23 | 21 |
| 7a2df988995673242954f3acf24f693c | 0  | 0  | 16 | 52 |
| 0bd7faf05b79d06b8d7da4f9c9622180 | 0  | 0  | 0  | 86 |
| 45030263c74b40d20d2f000e0560bbd5 | 0  | 0  | 0  | 86 |
| 96a057708efb9b2a651d6cf975ad3467 | 0  | 0  | 0  | 86 |
| b4a1693ecbafdf86769e93b62bcb1608 | 0  | 0  | 86 | 0  |
| 9598afafb041d76e136f5f4c03052ca0 | 14 | 15 | 28 | 3  |
| 55030995e797ac438044f8471c31a676 | 12 | 9  | 31 | 0  |
| 257245277c6be4fc18dbf387f3bb20b9 | 8  | 9  | 51 | 8  |
| 1c7414de4baf45bdf28e17ee9dcf00b5 | 0  | 2  | 0  | 76 |
| 7359fb1d208d7f439e210d72a9e72e07 | 0  | 0  | 0  | 28 |
| 0a84a91a9c24a635acc70a4f0b7a8fa5 | 0  | 0  | 41 | 27 |
| 8e12fc38d306689ea433fb8966ff80e9 | 0  | 11 | 7  | 45 |
| 0df34d8945ba833b9530186fde4c0e82 | 0  | 0  | 5  | 66 |
| d4ef2ae0fa2350a1557b92feb81f4762 | 0  | 0  | 0  | 72 |
| de1eaa121d49454c1eabf861d4bdddee | 0  | 0  | 0  | 85 |
| 7a45fed40f4cb04bf1e476760e5cc427 | 71 | 0  | 13 | 0  |
| c561f884d2e3af4d67d30bdb2454859  | 22 | 32 | 10 | 0  |
| c1c22bc8b442d71f2ae51c54ccc2e8a5 | 64 | 0  | 0  | 0  |
| fbf519fa6c351809ed9426ac9188712d | 42 | 36 | 0  | 0  |
| ecffe0ab1ced1947ddff50c39638bd19 | 46 | 19 | 8  | 0  |
| a525d55908365fb56d150eba3a48bdd2 | 12 | 18 | 8  | 46 |
| 177fa89d68cea76c4cca80a36e6d9254 | 9  | 0  | 0  | 46 |
| 47d7f95761f3119444ed7605706c7a9a | 57 | 0  | 27 | 0  |
| a035fd9b25383220b5e981e710417622 | 0  | 0  | 79 | 0  |
| 516835bb6617f32ff84d978875f45199 | 0  | 0  | 39 | 0  |
| 8c58c7164890a5be5b8f4c5376404472 | 0  | 31 | 12 | 35 |
| 1c585e25c7ec5fd8ca84b2e6c7013a75 | 0  | 23 | 0  | 0  |
| eebedf9dd21e0d14c2f8bdbf6a157319 | 0  | 84 | 0  | 0  |
| e0db3912b8ff82febe2dea86fdad877a | 0  | 84 | 0  | 0  |
| c141e12326aaaacb55afaa285f052ac5 | 0  | 0  | 0  | 84 |
| 483982c4c8b401b505ab02bbd3b17597 | 0  | 0  | 0  | 84 |
| 4b5c45ca0aadcf5c81142a7925f97c   | 0  | 0  | 84 | 0  |
| 10d7ceaea2f888336b3049af238567c8 | 0  | 0  | 84 | 0  |
| ab80ca222c00060e0fd6539dfff406e7 | 83 | 0  | 0  | 0  |
| 219b592559ecf737404e14e544f74c27 | 67 | 16 | 0  | 0  |
| 989d43f285a5f56584a1d9aafa566f2c | 4  | 36 | 0  | 0  |
| de0d5faf8c6f90752d739f4446715e17 | 14 | 22 | 19 | 23 |
| ec0205fa7153e02c0014a22c4a758905 | 16 | 0  | 0  | 41 |

|                                   |    |    |    |    |
|-----------------------------------|----|----|----|----|
| 1f12fcfa3b600e98187d552faf2035cd  | 0  | 0  | 20 | 0  |
| 65d0827c1b63dfbf959460561264502a  | 0  | 0  | 0  | 8  |
| 5cf980df01580f086d5f855d55155f0a  | 0  | 0  | 0  | 0  |
| 7a215e928c5403f045181aeafaaf46f4  | 0  | 63 | 0  | 20 |
| 87c4bbbbee9b8fcb0d6cd56c24d1e6c68 | 0  | 0  | 0  | 83 |
| 7f8edb76e420ddbe98ea31c619e82342  | 0  | 0  | 44 | 39 |
| 48eefed39696919192ef4e27c8c843b5  | 0  | 0  | 0  | 83 |
| ae5e101f9ce30f6d49f139a3cced61e8  | 41 | 0  | 16 | 25 |
| 57ffcd523f20870604cf1e70a5bb1a7   | 6  | 12 | 27 | 18 |
| ed29cc7757f75de451de6fcb47cfd425  | 10 | 12 | 26 | 17 |
| 59502985b1c6e6a7fe6fa1796793d0f9  | 22 | 0  | 0  | 60 |
| 81c1ec6b7591f2e0748e10317f244f20  | 42 | 18 | 22 | 0  |
| 6fc8b7264917dd9376fdf06eb6e0cd35  | 5  | 42 | 0  | 0  |
| 855b65ef46c2b73310409e8cf41442e6  | 0  | 17 | 8  | 47 |
| 370594be5881a0f6d9973600e58e55d6  | 0  | 0  | 0  | 0  |
| 49de40ee7db1c1eff1cd430f5e54b337  | 0  | 0  | 0  | 0  |
| 4c15b5f6a56ed8be4d1182f603028108  | 0  | 0  | 16 | 0  |
| 6937522daacaac5302ec541b27eff507  | 0  | 0  | 0  | 50 |
| b774f0dca2b7dda1c66b02ae9922b0cc  | 0  | 0  | 0  | 82 |
| e621829b448b03f5ab07140f9c0d4a4a  | 0  | 0  | 58 | 24 |
| 509bfb8f0d2e11bc22632c5b2796ae8d  | 10 | 0  | 3  | 68 |
| 5089aa068755140f803a7d949ff83ba4  | 81 | 0  | 0  | 0  |
| 025b82c65a37ae2692b75bf882b43f81  | 11 | 18 | 19 | 15 |
| 88ebc600ed97f1ec1ba4216eb89dc328  | 0  | 9  | 2  | 4  |
| 11500027a50addf244010daf92ee9b0b  | 0  | 33 | 0  | 0  |
| 81706e06f4cad7c23c4d0ff8276800dc  | 0  | 81 | 0  | 0  |
| afde4adc40e2228c026aad54868f8b0   | 0  | 17 | 8  | 56 |
| 6a8dcf0f8d57b2a5a6520353a59e3199  | 0  | 0  | 0  | 81 |
| bd30d8524870466f1061e0e99151563a  | 0  | 0  | 0  | 81 |
| 6bbfde4cc2c13469dac956a1d517225c  | 0  | 0  | 0  | 81 |
| a62a3ff90093089e20a6e43ff643f278  | 0  | 0  | 81 | 0  |
| 28dcf0af6ae1e8137c0f7490317cb985  | 34 | 18 | 7  | 21 |
| 8fd6158e93363ec932f4d9f66ab0e5d6  | 11 | 0  | 64 | 0  |
| 78b7768f84b1ccf43dccf9fb371ec290  | 46 | 0  | 0  | 0  |
| 108f2fb821e263e29ce43fe1a41a7b3b  | 0  | 0  | 0  | 0  |
| a92763cddc3dab8f25186a99437e2dbf  | 0  | 22 | 22 | 6  |
| 738e9c1f8e832501947bec8900ec1db1  | 0  | 7  | 6  | 67 |
| 35d5065737ebf5933ee64139018bd043  | 0  | 0  | 0  | 80 |
| caf9ca0a31dca67944e49311995b8f78  | 0  | 0  | 80 | 0  |
| a09a7e04b6ec0179c4f3659b0871f351  | 11 | 0  | 43 | 25 |
| d1fb1d524225d228d5400442d3263e20  | 11 | 10 | 58 | 0  |
| c2bb6714056d998f639a9c9289530a0d  | 3  | 4  | 67 | 5  |
| 1d96e5188d099195c706ea2f293dcc84  | 79 | 0  | 0  | 0  |
| a27b11bfa7159163d6cffa70c7acd983  | 0  | 0  | 0  | 79 |

|                                  |    |    |    |    |
|----------------------------------|----|----|----|----|
| 5d839ed1dd8b8ec0f1d06e1a94a98697 | 0  | 0  | 0  | 79 |
| bf6ae64420a17690678cb7a1be6d457e | 0  | 0  | 0  | 79 |
| 89a17249ca37a51612d2b28511ec33c8 | 36 | 6  | 10 | 18 |
| c10cd7c7682d41b04120d4502c2b3dcc | 40 | 0  | 38 | 0  |
| a4d20c87c29ff783751594c512941d6f | 28 | 16 | 12 | 11 |
| 38958ffd18e34f9074fa172c47018149 | 9  | 0  | 69 | 0  |
| 914aa07bdce8fbf3e33aef5acb4810da | 33 | 32 | 0  | 0  |
| f86f74effe52d5f94caf9a8ed5a1a10e | 0  | 15 | 25 | 33 |
| 1fc169029eb2d876f45633dc85cc7fd5 | 0  | 0  | 0  | 0  |
| db55f88068612dc64d6efdb6f648cf80 | 0  | 0  | 0  | 0  |
| c60c7fbb390c3686047703daf9ef9b6c | 0  | 0  | 13 | 60 |
| f9ff13f34a9dedc93c74d655edbcf5f6 | 0  | 0  | 0  | 26 |
| 44b97e2b301b23756f657c803041bcb5 | 0  | 0  | 0  | 78 |
| 07fe3bc753df684d48b319efa7fb5fb6 | 0  | 0  | 0  | 78 |
| d931324af108e8f92aa366db959989ac | 4  | 65 | 8  | 0  |
| 899bcdd1887178cd4ff6752a49f4d84d | 25 | 52 | 0  | 0  |
| 65a84dbcff3a45df5f2e03a8da9d0a53 | 35 | 32 | 0  | 0  |
| f79857129fff788dae4e4db65dc98016 | 26 | 11 | 0  | 25 |
| 5e5df1a495fec1340fb3a37d2554242c | 4  | 9  | 25 | 25 |
| c5c7e89932bc0045b74799015bf6fcef | 33 | 9  | 0  | 0  |
| f74cb5c0fe5c4eb4c2c41db247e3d26e | 0  | 0  | 17 | 0  |
| 84bea93dbf822e967d6ced37bf6f7443 | 0  | 0  | 0  | 0  |
| bc65e8b4799ba3edb56ee15620aeefb6 | 0  | 0  | 0  | 59 |
| e3d105023534f21e5d9a75e27b9895e7 | 0  | 0  | 0  | 0  |
| 4cdea91f50fc92480fbaf9df2782083f | 0  | 10 | 22 | 45 |
| c2398714aaaf28a0cc96a4a108921fe9 | 0  | 12 | 0  | 65 |
| ae0106aa55d356b8e532b95653fbb0ac | 0  | 34 | 17 | 26 |
| 45ed7217d86f5f0d36ac466a52c9c116 | 0  | 0  | 0  | 77 |
| 9f38f9bc50e44f03b8106e7df07450e9 | 0  | 0  | 0  | 77 |
| 7c3f83df69ae1e793cbb9cbbbc701ed8 | 3  | 0  | 0  | 71 |
| 57a8b11678a318aa5a9543c3fe857eee | 8  | 4  | 34 | 12 |
| 03c13c51f349090d16e08e4f0948bb80 | 48 | 0  | 0  | 28 |
| 4316e9f0ae5413eabb36266e3639fe0a | 7  | 31 | 0  | 0  |
| c680142fb0bdec0c46007491ad96fde  | 0  | 2  | 8  | 28 |
| 2c24ac9d882d567f68bda162089e2bf3 | 0  | 16 | 13 | 10 |
| a08ca133754dd585c1a796e016e99e11 | 0  | 26 | 11 | 26 |
| e60a1b18a29616f8d18b108040983e13 | 0  | 0  | 53 | 0  |
| 1690bf831c9271bc748db7d1c391c7f1 | 0  | 0  | 0  | 26 |
| 62e7cb13f82a48877061bc55f73e9aec | 0  | 0  | 0  | 0  |
| fc1ab8181cdeb898d9d0fab7cf99653e | 0  | 37 | 0  | 39 |
| 45952f81b282880e5c30ec944b316b44 | 0  | 33 | 6  | 37 |
| 67fab9a4f591f35e2db6edb108d9ff17 | 0  | 0  | 0  | 76 |
| f7398b9c828cb24a96d04c5ec156aa32 | 0  | 0  | 0  | 76 |
| 0e6ee0d3d2ac0f64e298de55f6263540 | 0  | 0  | 0  | 76 |

|                                  |    |    |    |    |
|----------------------------------|----|----|----|----|
| 29f668c01430ffda0287a3c507589fa7 | 0  | 0  | 0  | 76 |
| bccc9badfb74e67543b677312f9fd6dc | 0  | 0  | 0  | 76 |
| 09d4e3ac8a1ed8a6f44c9605dbb053b8 | 0  | 0  | 76 | 0  |
| dd695472d05d27fea430276f5542954e | 0  | 0  | 76 | 0  |
| e88aa0f2306e48bc7e855eb6fc287a25 | 75 | 0  | 0  | 0  |
| 00afd0b4fd0918466a06b686de9da489 | 22 | 14 | 11 | 28 |
| cd6fc0b260a81c820615e706f9acba4c | 63 | 0  | 12 | 0  |
| 642cfbfdf852e09e3b8f8288a140b201 | 13 | 0  | 0  | 0  |
| 5c7c1d2e6a1ac8b1f3295c17b5908617 | 38 | 37 | 0  | 0  |
| e3c9145a014c63de79a5fb12b5ffccf9 | 27 | 13 | 19 | 16 |
| 82e17bf9c6567c854daca677ca292899 | 41 | 21 | 0  | 4  |
| a6831695eebaleef46e45b9864c68309 | 17 | 0  | 11 | 47 |
| 658f8e759ac7c72aa33a047b2ea59e41 | 0  | 32 | 8  | 0  |
| 5a09ad530b0b77ca3be4f9ff87889735 | 0  | 0  | 0  | 0  |
| 219351fc2015b0f7d0e25ca5649a12ca | 0  | 0  | 0  | 5  |
| dabad2c7247867d3790b71e9dc1fd765 | 0  | 6  | 45 | 15 |
| aef466516f8aff3d270bd40345f191a5 | 0  | 0  | 38 | 0  |
| 2954516ff9ef28fb0f50b6be1fcc9758 | 0  | 0  | 0  | 75 |
| d727379506d7a599906d85a381782ad2 | 0  | 0  | 17 | 58 |
| 3a3076c0f3970b42373c383ca8d9d8f0 | 0  | 0  | 75 | 0  |
| 434723fdfaf111f86da62b53c3acd455 | 12 | 0  | 0  | 62 |
| 05ca88657592c0b4a012092fd214a53c | 45 | 14 | 7  | 0  |
| 3b0e51768ed3bf41fa2068fc2b0a5cf0 | 4  | 26 | 0  | 17 |
| f22d7276c7cff29f70dba472ec48076b | 0  | 50 | 2  | 0  |
| 5bdd01faf897ba4001206af39d6ed455 | 0  | 23 | 0  | 0  |
| 4cc0c4a88afa62dc868d208f01dd7a95 | 0  | 0  | 0  | 74 |
| bed7f60b42e492cc322a4edaaaad29ce | 0  | 0  | 0  | 74 |
| 93118d60ff137523df8bb67b8b76ba74 | 0  | 0  | 0  | 74 |
| cca00ad48d4849fc5eaece3fbe05cdfe | 0  | 0  | 74 | 0  |
| 976103fec2e58a487cf23e3db300aa0c | 0  | 0  | 74 | 0  |
| 67793c89bbcc6d3c9e0faf3b022c97a0 | 0  | 0  | 74 | 0  |
| 3bf22f76f17e21f8fd8bb6908e3bc8b5 | 3  | 0  | 13 | 21 |
| 830fe6e16c1fdf90b1377b04c7ba9f11 | 20 | 12 | 11 | 21 |
| 4c70bb5ce2a464079170f75568762de6 | 2  | 23 | 4  | 39 |
| e9e201d45decfb4fb9316d3b92700d57 | 0  | 6  | 9  | 36 |
| 9ed3d3ac117b506192a8c78b1036c86c | 0  | 0  | 0  | 0  |
| 81af69edd16a164a6199525e46947ea2 | 0  | 28 | 15 | 11 |
| 5a96981f544f566914da1f4986e08b0d | 0  | 0  | 25 | 48 |
| e018b9ae3f44d2317a27e1139b310b36 | 0  | 0  | 52 | 21 |
| b39cfe24f6c5da8fc530862f5695d715 | 0  | 0  | 0  | 73 |
| c859bb7de6357fb26d38d3b2b97b0168 | 50 | 22 | 0  | 0  |
| aa408fd05ab7e7a3ff7c6b578e12ceda | 18 | 7  | 6  | 41 |
| c08ca944f4478e382c9a9da98bf8e78c | 9  | 57 | 0  | 6  |
| fad37542ade9e2f8ea0454fa56f7f08e | 7  | 37 | 0  | 28 |

|                                  |    |    |    |    |
|----------------------------------|----|----|----|----|
| 5271fae12c11e36d9f525622234dd0d0 | 42 | 0  | 0  | 21 |
| dd88a9a63b7718c4f98076a91498cd4e | 3  | 69 | 0  | 0  |
| 7b2b2a8e963cc72394114a12ced87098 | 47 | 13 | 12 | 0  |
| 2edf4f20df823c2137c1f26959824823 | 16 | 14 | 0  | 15 |
| 63e6ab59a2949e7855fc17bd560d1f27 | 56 | 16 | 0  | 0  |
| f82026926e4f0c2c43d7ca8aa4082e58 | 0  | 0  | 39 | 24 |
| b3bc2ddcc08f66dd5d373161dae9b7de | 0  | 0  | 0  | 0  |
| 5fa12f8c1b11da8c6e7fa72a125315d3 | 0  | 0  | 0  | 58 |
| 8d71959607ac54f842f397c454b3c700 | 0  | 0  | 14 | 53 |
| 1d107e507616f432bddcb2d0e1649b10 | 0  | 58 | 11 | 0  |
| ceaf73ed820b5910980360b3035bc290 | 0  | 4  | 58 | 10 |
| 52c6b116c57c1abc24ea258fe67665b6 | 0  | 9  | 0  | 63 |
| 5f2426d5a59b53718b58520cefc2c85  | 0  | 0  | 0  | 72 |
| de0973c69f650e3d13d416aa055ca7cc | 0  | 0  | 0  | 72 |
| aa9894e5ba7c3e6c8d8e5118d424b096 | 0  | 0  | 0  | 72 |
| e65e0983031b4dfbdb63d3bb338c2219 | 0  | 0  | 0  | 72 |
| d16dd2f23890a7c91d16ec3ce4ed2964 | 0  | 0  | 0  | 72 |
| b40a62179ace2963552c48942edf88e5 | 0  | 0  | 72 | 0  |
| 9df8522badbf34104d53225af9f34981 | 35 | 9  | 13 | 14 |
| bec4867cd2b2d3f53721e81c040eb506 | 22 | 33 | 0  | 0  |
| d5dcf8928cb4a45693ddd6276389436  | 0  | 0  | 57 | 0  |
| e16226eca21ae32daca1233a9b7648da | 0  | 47 | 0  | 0  |
| c684a7e509353f5df806e1f6f5fb0d5a | 0  | 0  | 0  | 0  |
| 50468a2610ee4959b0ae07109b3e885a | 0  | 0  | 0  | 0  |
| 40f087166b5d397f74cf8fe177343981 | 0  | 0  | 11 | 57 |
| da270fee445e2efcc4b5d6a889df5e5d | 0  | 39 | 9  | 0  |
| ec8aed51b647b70aa7422749cfa730bf | 0  | 7  | 0  | 64 |
| 9d6e4ba9973e7a548a799b022ca8bc4f | 0  | 22 | 31 | 18 |
| 148f49ab9934269b924f1e142dbf255d | 0  | 0  | 0  | 71 |
| 8cd391364f10dba979dbf373cc2b204a | 0  | 0  | 0  | 71 |
| 89ac0f253d4801819d53f9c9c0859cf0 | 0  | 0  | 71 | 0  |
| b2c5ac05912a0abad4d5eccc91a1499f | 6  | 23 | 18 | 0  |
| 2aeaf6cb5cc494ea824cf1a871c86fbc | 70 | 0  | 0  | 0  |
| 0d31af3597c0c3142308863a126e488f | 29 | 0  | 0  | 30 |
| ccdc6fe1720d77731a424085344ede4f | 6  | 32 | 0  | 20 |
| 39a4a05ad188a7210ac6a8df7df22a13 | 0  | 21 | 22 | 0  |
| 0c76fad9a32227344699ccffccdc2419 | 0  | 13 | 26 | 0  |
| aa34e847ccbd7379609638f07af225bf | 0  | 0  | 55 | 0  |
| d4e2b924b543b2023369c05d6a533c1c | 0  | 0  | 45 | 0  |
| ee88580b54579377bcb0b5a9762434d4 | 0  | 0  | 0  | 44 |
| ddd7e1082a6751de8e049b7a7529a41  | 0  | 0  | 0  | 0  |
| 212ac6cd5e13dc5cf5e291ca392b932c | 0  | 0  | 37 | 0  |
| 9951e405489f4fa823367bcda23c2dab | 0  | 0  | 0  | 0  |
| 7abc2a80a27f83d543a68ff284f61eaa | 0  | 51 | 6  | 13 |

|                                  |    |    |    |    |
|----------------------------------|----|----|----|----|
| 6b65d6168da6c5898fdf14c3f1f3f652 | 0  | 70 | 0  | 0  |
| 01db0cfa8f72ff583b9c2166d9409029 | 0  | 0  | 44 | 26 |
| 497689defc29e1a658155816f23ace6c | 0  | 0  | 0  | 70 |
| 5014c1edf477d7b6d09e952bcc240abd | 0  | 0  | 70 | 0  |
| f76b83e1caaa319024d59ee39f785bab | 0  | 0  | 70 | 0  |
| 869c5d8922768ac694a187396a25e37d | 35 | 12 | 0  | 0  |
| 21c0633c3daf0d6d75fdc24224828438 | 23 | 24 | 12 | 0  |
| 12ee87f0cd0993f563fce1223fd7a8a7 | 46 | 0  | 23 | 0  |
| 866ac0c17ad017e5109b998d1d87c0d9 | 0  | 44 | 2  | 19 |
| 4b6d2796fb155a96846d813b827addde | 0  | 0  | 0  | 0  |
| 020b84b54175188490f109d862be8001 | 0  | 69 | 0  | 0  |
| 3eb171ab6de8804f3415063865965a67 | 0  | 0  | 0  | 69 |
| 1720fc9f346632d985693353a5bbb281 | 0  | 0  | 0  | 69 |
| a0fa947d441edba39496784d7cda4d49 | 0  | 0  | 44 | 25 |
| 853613431aaa46a8a78a5f3ab8d5655f | 0  | 0  | 69 | 0  |
| fe71c9d22386a66d06873e05d0209fb7 | 68 | 0  | 0  | 0  |
| 7b6464eea651437690de3ee49db77e0e | 52 | 16 | 0  | 0  |
| 0d49db71e3a6dbe529e8ae1b38b20511 | 33 | 0  | 25 | 0  |
| 46607f7aede9c897a3237799bc8939a5 | 24 | 24 | 15 | 0  |
| 670e4543deac235e77d6f4d735a36162 | 0  | 0  | 0  | 25 |
| b647a91c7089423cff517fdbce0aee89 | 0  | 0  | 0  | 0  |
| be4f6f448a84462e8e0f2994e738a36d | 0  | 0  | 0  | 0  |
| 4653d1af362c2e94a50e8163888c9d6f | 0  | 0  | 0  | 0  |
| 563bc1870e8774d82b06491c021ce58c | 0  | 0  | 37 | 24 |
| 370fcfba21953013fc882b97b2c2733d | 0  | 12 | 10 | 46 |
| 459080e255ee6e056364dd5cbc135d86 | 0  | 21 | 0  | 47 |
| 8855a10b0ce1f56e97b2bd4dfe687daa | 0  | 0  | 0  | 68 |
| 2166f78a90f4ebd6443ea97dff0e4df4 | 0  | 0  | 29 | 39 |
| ea1f5cc323bf167f85fb8b48989143c3 | 0  | 0  | 0  | 68 |
| 633e3f25dd4ea2e6163f0f01e80035b7 | 0  | 0  | 0  | 68 |
| 3549a58de2cc18f0bd2eca27e47d4ed8 | 0  | 0  | 68 | 0  |
| 86370d79b6a2d0db505c3d9ed1a8e060 | 26 | 0  | 0  | 18 |
| ac21ee52e5b20c03b79cb5a5e65e676b | 67 | 0  | 0  | 0  |
| 918bc1448704e23bf7152c6ced1a9c29 | 20 | 18 | 20 | 9  |
| 3a82b0be1763d4b78aa674f63a3f40b2 | 8  | 16 | 17 | 0  |
| 4949b4cc46bc1dc65629fa0eaccd75b9 | 67 | 0  | 0  | 0  |
| 68cc1a0d2166d36b8488eafae3cff437 | 0  | 11 | 10 | 12 |
| ae7d8efb06e9c0ad71820823c3089849 | 0  | 13 | 44 | 0  |
| 69b1d2bf1c1a840b551484272a71d2fd | 0  | 0  | 0  | 54 |
| fd4262fa0b2d2b1d52af1638feb30745 | 0  | 0  | 61 | 0  |
| 302f314ae6f8194227091534f0f2de20 | 0  | 0  | 0  | 0  |
| f007cbe3119a72a4077e8b047407741a | 0  | 67 | 0  | 0  |
| fa0dbe44ea9ec6b775f10c5cd4f604ca | 0  | 0  | 0  | 67 |
| 50e659b10989c5df042b3f8c26e64563 | 0  | 0  | 0  | 67 |



|                                   |    |    |    |    |
|-----------------------------------|----|----|----|----|
| b61340e49550f7ddbaaed4f59d8c2c6b  | 0  | 0  | 0  | 67 |
| 60fcd83cbbf0ae0e3e7e35f7eb8bbda6  | 0  | 0  | 5  | 62 |
| f015f99e2bdefe12fbfb3755977ac84f  | 0  | 0  | 50 | 17 |
| 3dc55a59d1c8619cfa6f864de20deb96  | 0  | 0  | 67 | 0  |
| 231aba4401262f84578ab6ea38a73b94  | 15 | 16 | 0  | 27 |
| e90c5fbd0ae5b708ca74864ab8c9eb95  | 28 | 0  | 38 | 0  |
| 08af7a6758187e7e2e3d39ca2813078c  | 0  | 0  | 33 | 24 |
| 99c384159e3d45943e8905fffd389dfa  | 0  | 16 | 6  | 31 |
| 1c61a72811e6f957a8d2e06cbda14707  | 0  | 12 | 16 | 24 |
| f197f64cada674925a09ef0d15e9e085  | 0  | 0  | 0  | 0  |
| 00954da950b5304b3c26bfb9552bdae6  | 0  | 0  | 0  | 0  |
| eae6fb65d3a6df42268d3714e95f7c3d  | 0  | 28 | 0  | 38 |
| c618789e027c35f8ef4649337f3b6e62  | 0  | 0  | 0  | 66 |
| 22645bcf097358662740efcee2c221b9  | 38 | 5  | 14 | 0  |
| a0ec1bdae5055b59af7e6684988a8102  | 19 | 21 | 14 | 0  |
| 724b51d461ce46959e286b81853a41ca  | 65 | 0  | 0  | 0  |
| d6731777888b864236005a71e590a74b  | 17 | 0  | 5  | 13 |
| f098cbb48be722fffdcf1c5d5601d254  | 0  | 0  | 19 | 10 |
| 78560f3880e9fa57ed9fce92a9c9021a  | 0  | 0  | 28 | 31 |
| d49e5e2a215b7e27024444d2ad4e6373  | 0  | 0  | 0  | 0  |
| 6fcd178c1fdf71d5f2881b6c5d2f4255  | 0  | 0  | 0  | 0  |
| c32bc8d0d2999b17e1ff79c9c7d39a6b  | 0  | 0  | 0  | 0  |
| d09d6dce40b188bde5ea948fd1acec4a  | 0  | 39 | 0  | 26 |
| a398c4da6234191c1b14899120a80bc8  | 0  | 26 | 39 | 0  |
| 03282bfa29bac14b49064f95960a802a  | 0  | 0  | 62 | 3  |
| 33689f5aa51bd90b10115ac91aba3cf4  | 0  | 0  | 0  | 65 |
| 99fa44f7e2508deb76cb51ab3cd01b61  | 0  | 0  | 0  | 65 |
| a0eb5d332a22ee47c3159d481564e36d  | 0  | 0  | 8  | 57 |
| 56201c76c535775056d871c897a6ec3c  | 0  | 0  | 42 | 23 |
| 9f5ff066101aeead9f6323850d31b3c7  | 0  | 0  | 65 | 0  |
| 151f374a3cbdbd408ea5e14f3e3f5008  | 8  | 0  | 18 | 38 |
| 562325bd5f9f811ede4d588cc1e2e562  | 12 | 9  | 0  | 0  |
| 82248134613f450c61e33cc2ddff3a9b  | 23 | 10 | 31 | 0  |
| 67040ded83e9478c25ae569f22e4442b  | 8  | 31 | 0  | 25 |
| 9ba97f7be7874b91bbeb3f4ede502fdcf | 3  | 0  | 61 | 0  |
| 72636af17afdce19fe23a59fdce2d986  | 40 | 17 | 7  | 0  |
| d8bcd419d96cb2b899e14d89912d4294  | 6  | 0  | 14 | 44 |
| 600b9c4d4c0fa8586ba59c103ca08737  | 0  | 0  | 0  | 0  |
| d6ae8ba27a3f6ec00138b4204d488d03  | 0  | 0  | 0  | 0  |
| f69b9dcfd5d32f66272d0ab9c8e19c7d  | 0  | 5  | 26 | 16 |
| 136cf76f7347d97d55f406ea033ce542  | 0  | 0  | 0  | 0  |
| b739126339705ae1957b3778b7c6e5f8  | 0  | 6  | 10 | 48 |
| bb7c7c6d91b6e42de543b30ccf2c5e41  | 0  | 17 | 25 | 22 |
| d8b51a384d1336faa28e5faf2a9d1645  | 0  | 26 | 0  | 38 |

|                                  |    |    |    |    |
|----------------------------------|----|----|----|----|
| c5c0a3a090a5c8711b468f113218d258 | 0  | 64 | 0  | 0  |
| 9da82dc0b2832d39ebd49114156706c1 | 0  | 0  | 0  | 64 |
| adaa52a9a5e5a17a607cd0f9716ba58d | 0  | 0  | 49 | 15 |
| 20166f6f420b30bfbbd22196df1a6d45 | 0  | 0  | 33 | 31 |
| 8fcff33475f3b8af811351b23b662302 | 0  | 0  | 64 | 0  |
| ba9a9c1363fd8e35b54632c52f5817b5 | 0  | 0  | 64 | 0  |
| 66c01e3b3376a505a0946d8a08c53e48 | 49 | 0  | 0  | 0  |
| 54bd4d48671e19e969021e5d201b49b9 | 26 | 0  | 25 | 0  |
| e9a58f87091a615224db9ea07ec31528 | 8  | 20 | 5  | 0  |
| d39866a6b8ae85d1fa99ffa413038006 | 63 | 0  | 0  | 0  |
| a08dc014315c495e5dcfc2e7e89b1395 | 63 | 0  | 0  | 0  |
| aa17566b246b12b660f3e25c498433bc | 16 | 37 | 0  | 0  |
| ac988e8a064c26812080910e8ae6277e | 63 | 0  | 0  | 0  |
| 28524763fbf661df977dbed65d35f631 | 19 | 7  | 0  | 0  |
| 4d2656254b3e651101c46e1de83cf29c | 0  | 31 | 0  | 0  |
| 4c194a5f3c106298a7553c34caa4ed07 | 0  | 14 | 0  | 27 |
| aeb45d4555a30e901eb50596beac8c88 | 0  | 0  | 30 | 19 |
| 1c03a92dc236eb9239ee86a9384064ed | 0  | 0  | 0  | 0  |
| 8b25f97a76253fea7f389f00124ee3e4 | 0  | 0  | 6  | 57 |
| 47cdcae3d511e28c203170c6c7b56619 | 0  | 0  | 52 | 11 |
| b260f98fcbdedfb922e4a2be2cb1bfac | 0  | 0  | 21 | 42 |
| 53c8c5d47984beebfa3397940fdd3806 | 0  | 0  | 63 | 0  |
| 085e9b26fe1edd5a720fcedb9f7a54da | 0  | 0  | 63 | 0  |
| c12dd3130cff0a4b7c8e07a761df0fe5 | 10 | 52 | 0  | 0  |
| 256b6ad398f97f2b8062aa1f43f1bc53 | 41 | 21 | 0  | 0  |
| c5328df574d1804f187ec21fe09ae039 | 62 | 0  | 0  | 0  |
| fde204eb177b9c6fc206b1b263e80908 | 30 | 26 | 0  | 6  |
| f90507ea6157ac0d2e125eb8f200d688 | 37 | 25 | 0  | 0  |
| 7eeb7b15dc960fe7c328bbe19554467b | 14 | 48 | 0  | 0  |
| 17f81e54e57fd18026cb181d84a946b0 | 13 | 13 | 10 | 26 |
| 6b1e792cb035f69e0c554d31ce646362 | 29 | 0  | 0  | 33 |
| d61bae98154869b7dc6b922d61f69080 | 0  | 22 | 5  | 22 |
| f801c8f304b4e1818777c07af3e1900c | 0  | 0  | 0  | 0  |
| 54dc58b02a85c4eaab28d7ebb7dba094 | 0  | 0  | 0  | 0  |
| b13c126492cafb699eefd5927360856  | 0  | 0  | 8  | 44 |
| 54038226428bf7df97d3b6a66f5f7f25 | 0  | 0  | 0  | 62 |
| a1005aa57798f6bb092d62db08d1f0db | 0  | 0  | 62 | 0  |
| b0863c1bd266c03b670442eb9a51a660 | 0  | 0  | 62 | 0  |
| 681392ab048ef051989db658eea27093 | 29 | 11 | 8  | 0  |
| c7f041cf06c0a8236c01aa78508cda31 | 6  | 21 | 19 | 4  |
| 752bd32879e266647bd8262973cd7d8c | 25 | 0  | 21 | 15 |
| d6c32a668353bcce35824f2faa0c7b14 | 61 | 0  | 0  | 0  |
| 3d90b8f18314507f2ac3ccddf722e7c6 | 0  | 13 | 13 | 13 |
| 436ce134f97f6363fc9dde58dff639f5 | 0  | 0  | 0  | 0  |

|                                  |    |    |    |    |
|----------------------------------|----|----|----|----|
| 8f888955cfdafdad71e4f29e7415631b | 0  | 0  | 0  | 28 |
| dec0613fcb2b52c877bfe9f82ea16aaa | 0  | 23 | 5  | 23 |
| a53839dad1d4db7dc2ffa4e8b80a156d | 0  | 2  | 18 | 34 |
| 979821da16c23ecd32a2a26739cb241c | 0  | 30 | 0  | 31 |
| 624fae887f550eaae85f8fd432e00ffd | 0  | 61 | 0  | 0  |
| 2cde1428d93b5a5223b5544b9790b932 | 0  | 0  | 0  | 61 |
| 7f0c1356d2a9672bf6752fb598e97e62 | 0  | 0  | 0  | 61 |
| f6fc5feee15cab3b8ab3de2811d617ae | 0  | 0  | 0  | 61 |
| e9016c6ef8f31a4dab521b69e51c0ec7 | 0  | 0  | 61 | 0  |
| 2d9451aca3d3b27ff35619ff2a692ed4 | 0  | 0  | 61 | 0  |
| ed2d4243263448a37f09d39e2f26e57e | 0  | 0  | 61 | 0  |
| cce3819be568aa1d2f968e6280ddd42b | 35 | 13 | 0  | 12 |
| 2c4e8aff574ff333411495289de16af4 | 36 | 18 | 0  | 0  |
| b6738bd2986e55405a9374ec81560d3d | 16 | 0  | 44 | 0  |
| 044774f4646db7101208a2362ed9c603 | 23 | 0  | 21 | 16 |
| 46a2abc8d44991be1de815718a08eee3 | 19 | 41 | 0  | 0  |
| 540a3caccacf4a39342d4b955227741  | 19 | 0  | 0  | 0  |
| d6906d597a144eecaa80f0e8c0f76bc5 | 40 | 20 | 0  | 0  |
| 9cb9fffe640d359cf5055dc1074c284e | 12 | 0  | 10 | 6  |
| 31743e5526d39b839e27c50f99771464 | 10 | 14 | 8  | 14 |
| d8f7025957edca9f036c13cb9601e2f1 | 0  | 45 | 0  | 0  |
| 9ac37ab8f439885372259f633e69e362 | 0  | 17 | 0  | 0  |
| 0e9a5bb4ed58ad09f34e8c6c30c16e1c | 0  | 4  | 0  | 56 |
| c382d5ef2ef224137dc4c559c669d847 | 0  | 60 | 0  | 0  |
| 1eeb2d53a1d074fe11f9383e65d4c92c | 0  | 0  | 60 | 0  |
| b4747b777dc184aeb6dfb958985ea26f | 0  | 0  | 60 | 0  |
| 18a3838de4183b9faa80e908ef9e1baa | 18 | 4  | 35 | 2  |
| fa665d92a18b9137354fedd6bc26d3dd | 7  | 48 | 0  | 0  |
| fc6609d9a5859b7295b23e29b8036801 | 3  | 30 | 0  | 22 |
| 3972a158ae344c79803d5b7b594f6c1d | 40 | 0  | 0  | 19 |
| 498d966f9ae5f38cde715c3a8d1098e9 | 20 | 0  | 9  | 6  |
| 5ddf9d7e41d8f50a651430f2a64b9cc7 | 31 | 28 | 0  | 0  |
| 81a74810bd4c824c37b3cf42fbbeac64 | 4  | 12 | 22 | 21 |
| c03a450551b002d38dca2e57a057ca79 | 40 | 19 | 0  | 0  |
| 5d325d75469463a287f6db86234cf47b | 59 | 0  | 0  | 0  |
| 1d86393c6240deb32ab4a3d9f9284ef6 | 59 | 0  | 0  | 0  |
| 79288e3fd1abe1d00f8ce7c3bd1eb895 | 21 | 38 | 0  | 0  |
| dc999453e94b1433642ad6986dff8a31 | 0  | 34 | 0  | 0  |
| c664302d709042edec7377ca0a0460b4 | 0  | 0  | 0  | 0  |
| 16c61ae6608d888a74ad0344c1fe3712 | 0  | 0  | 13 | 27 |
| 308e4688859f64c0623081a9eb7dd4   | 0  | 0  | 0  | 0  |
| a23c64d0deb163b431f8497b553569f3 | 0  | 0  | 0  | 0  |
| 6881d291c6219a251f60a328b0f33471 | 0  | 19 | 7  | 33 |
| 232bb22abe058ce5e105377cf8dfa107 | 0  | 7  | 0  | 52 |

|                                  |    |    |    |    |
|----------------------------------|----|----|----|----|
| 93a4c7bbd40ee1ba242c9f76582c2c75 | 0  | 59 | 0  | 0  |
| 46ea3725a081dc880a2edb1a6785f102 | 0  | 0  | 0  | 59 |
| 8fe095cbb319e1027e1da44f997c9672 | 0  | 0  | 0  | 59 |
| a006997edfca9249d5cc8bc314c1fb53 | 0  | 0  | 0  | 59 |
| 44d95da905e6ae47c1f27db7f70d9966 | 0  | 0  | 0  | 59 |
| 5d19f1ec7e344101092c92a0047c3cd1 | 0  | 0  | 0  | 59 |
| db533ecba34d9347ad2eb7335bdfd903 | 0  | 0  | 59 | 0  |
| 41b32ffbac3f7964b9199c2b71492e14 | 0  | 0  | 59 | 0  |
| 54b8f6cf798ca03255dac2fff2fa2e77 | 3  | 15 | 4  | 2  |
| bbaddac7c972dcded1ae931ab5fe3ee4 | 58 | 0  | 0  | 0  |
| 1a0075025069f215b28171574110c6fe | 0  | 14 | 0  | 35 |
| 37c666af5c0de770f151f995cd46dacf | 0  | 0  | 0  | 41 |
| 0ccd22d7f7c39e6d3488552b90a9b3d6 | 0  | 0  | 0  | 0  |
| 593395cee50460e2215d163a5a389035 | 0  | 0  | 0  | 0  |
| 83962a8b94bcb0e9101fee65af09d669 | 0  | 0  | 0  | 0  |
| 1c63d802da6016abed33037f5b5ca808 | 0  | 58 | 0  | 0  |
| f834d3f447a8283f84da8c716079f122 | 0  | 0  | 30 | 28 |
| 5158eeb4530ac086d606e35e67830b9f | 0  | 0  | 0  | 58 |
| 427306086d1350794ef102fc2846d96a | 0  | 0  | 53 | 5  |
| 929333cab78c4fa50aa437d95bfd68e2 | 0  | 0  | 0  | 58 |
| ef26a6b700d6d7c124fa25f1074d6a83 | 0  | 0  | 58 | 0  |
| 09daaa3fa191c82b4c987a7fb54dbc67 | 0  | 0  | 58 | 0  |
| b91d7ea1627cf4ad91f09720a9670250 | 43 | 0  | 0  | 0  |
| f18bb275b50b99bf2938cd57b18cf76f | 7  | 32 | 0  | 18 |
| a66ea243dbf66b74bf4a7bcd65987f8c | 39 | 18 | 0  | 0  |
| bc0eb589d489e15b197b9dfac607170e | 57 | 0  | 0  | 0  |
| f4b95f1d118625611201c7f515f1b74d | 17 | 0  | 10 | 14 |
| de197e06ef8edbf987bb7952844b4f8a | 57 | 0  | 0  | 0  |
| 50f659216878e6882d4209496a1966fd | 37 | 0  | 0  | 0  |
| 1ad2c84fde087773414fd29bb5c8fa88 | 3  | 9  | 14 | 31 |
| bfd72d42b07d4ae275292503c90a87c8 | 5  | 24 | 0  | 14 |
| 67e468b55d6cb5de9e354a911383592e | 0  | 40 | 6  | 5  |
| aeef72971ab01345062cffae4f713411 | 0  | 0  | 0  | 0  |
| 75e38a397b695467936928903b5d43e1 | 0  | 0  | 0  | 0  |
| 92801ad251765e1dfa29c934be6050c9 | 0  | 5  | 7  | 36 |
| 9af5b5691fa8c0e3ac934054fe161da8 | 0  | 0  | 42 | 5  |
| cba49aad3c3577ec5d39cf8d4a4d09e7 | 0  | 16 | 9  | 29 |
| 827b869f6065fb06a55e572379c5e82b | 0  | 0  | 0  | 37 |
| 0b529bf2cf13c97849a0d76a62f47b8f | 0  | 0  | 0  | 0  |
| a728d484b222f3dc323178bdc66e3bc6 | 0  | 16 | 6  | 35 |
| 6f8939430b76c07b79dd1ede42213c4d | 0  | 14 | 43 | 0  |
| 759fb1f7148fcef43d3d49757b81ba93 | 0  | 50 | 7  | 0  |
| 5286dfb41b9e17fe4ab3da3884f9a46f | 0  | 0  | 0  | 57 |
| 296898aa52b4a1716b5580250dd12912 | 0  | 0  | 0  | 57 |

|                                   |    |    |    |    |
|-----------------------------------|----|----|----|----|
| 068a5fb45ddb384533555b7f32c90be7  | 0  | 0  | 0  | 57 |
| bf953a2452001a3582dc374cd9ff0dc4  | 0  | 0  | 0  | 57 |
| 62c8cdabc6502e580f1f31036e6287df  | 0  | 0  | 0  | 57 |
| 0b003e2c2fa3d00456ffb3e3e1b30ea4  | 0  | 0  | 25 | 32 |
| decdb58e4688063486783115a2f35383  | 56 | 0  | 0  | 0  |
| ac773b4df11c5de98622f9ee70cd8304  | 10 | 0  | 0  | 46 |
| 93fb895de49bdefd1954ee42e0e02dee  | 31 | 0  | 18 | 0  |
| 8cc2cf5796539e4edd321ec68a5cf6e4  | 24 | 0  | 0  | 0  |
| 6054c43b51bfaf7343eab7cc514635df  | 3  | 0  | 5  | 42 |
| 782ce2e19ea02a11090be77c4abf95db  | 5  | 0  | 0  | 51 |
| 6e7078fe87c9fd8aa5bb04a2ded8887d  | 56 | 0  | 0  | 0  |
| b325d8bb41d6be3edacade7d23430618  | 5  | 28 | 15 | 4  |
| 93ec7f0eea59a89a4960c0d072c50247  | 19 | 37 | 0  | 0  |
| c5952da562d9b853dd2d005d753a61a0  | 8  | 0  | 0  | 48 |
| 5973719a5d075ab710fc0c58c459d1a6  | 0  | 8  | 0  | 0  |
| 598ca95207e89ffab8be769106204e46  | 0  | 0  | 0  | 0  |
| d3e5524d335fb0b76fb35b24e37d8337  | 0  | 25 | 6  | 9  |
| fca4a6c23c3f92d4fdb8ab789f7685fe  | 0  | 0  | 0  | 0  |
| efd5920a9e52849806dc85e70d3a39dc  | 0  | 0  | 29 | 22 |
| 35746b2eef9a8358b5cd495446811c5d  | 0  | 0  | 0  | 0  |
| d1540e5be3266e0920cc259a33c789ba  | 0  | 0  | 8  | 0  |
| 1b0239d84166ac61f7d935e8dff75c08  | 0  | 17 | 0  | 0  |
| 28c28de08fca98fa5d9cbc7b486a98e1  | 0  | 0  | 0  | 0  |
| aba800b8e9a98c7a99c5abdd03f479fb  | 0  | 56 | 0  | 0  |
| 5b666159e8ba71b861df5a8b8c4fdb41  | 0  | 34 | 0  | 22 |
| 45f070bcdd7c7ff80fca3335c1dd18fb  | 0  | 26 | 30 | 0  |
| 5a8d88deaae080c68ca1584d1b1ab698  | 0  | 35 | 0  | 21 |
| 93fd1cbd8a5f274c6ec30cf6142289e6  | 0  | 0  | 6  | 50 |
| ee63f37854505dd7dc8e785b59ad85e1  | 0  | 0  | 0  | 56 |
| 0065eeb7de05fbfec088fa1d1e644f01  | 0  | 0  | 48 | 8  |
| caca9dc9d1ba822937df9fd70b8ff588  | 0  | 0  | 42 | 14 |
| 146a0b5b0fc78df1d46b6b74548e7c94  | 0  | 0  | 41 | 15 |
| 3417907b4cbdd022626d43059d993e12  | 26 | 0  | 0  | 29 |
| 4ceb8ab12d25ad1b841650a31c28c58e  | 14 | 5  | 13 | 23 |
| e757cc1d1b9f0a1698e65bce22aa45d4  | 10 | 25 | 0  | 0  |
| 51ea49cbf94ff1e3d63ef881665ed729  | 23 | 0  | 0  | 23 |
| 00140907143b9be30c21da504ac88149  | 21 | 17 | 14 | 3  |
| a723503931252fccf66daf99483cf7fd  | 0  | 0  | 0  | 0  |
| 2c05f420c794dcb74b6a6f5a820c3f5c  | 0  | 11 | 7  | 22 |
| d5a13b9806b77e8cf62a3189313683a0  | 0  | 0  | 0  | 0  |
| 3aeb600bfbdl1d887b01a49168df0fdb0 | 0  | 0  | 0  | 0  |
| df19de4892c70d2e96f53468edd88612  | 0  | 0  | 0  | 38 |
| 67f952cf13dcf278e3df08bf7e1377bb  | 0  | 55 | 0  | 0  |
| 34135a851811ba919b08b7998c55badf  | 0  | 0  | 0  | 55 |

|                                  |    |    |    |    |
|----------------------------------|----|----|----|----|
| e9a345f7dcf88d932bbdf9437f4d028c | 0  | 0  | 29 | 26 |
| 5fec42c658fccbfd16493d412eaf1f2e | 0  | 0  | 0  | 55 |
| bad271c1517a55225f59a3667b904a2e | 0  | 0  | 0  | 55 |
| b5aa94fd3bd6f58c6f0b49de4a46beca | 0  | 0  | 55 | 0  |
| a54b4ba52c6dd94234e25eaab77f164a | 0  | 0  | 55 | 0  |
| 3bb09608ed7e5c3462ed9ed6483a219a | 0  | 0  | 55 | 0  |
| 07863a34d58010ea31c61edaa6ee258c | 0  | 0  | 55 | 0  |
| 84ef4952046d70b7c174729871637bf3 | 41 | 6  | 0  | 0  |
| b536f944e2db14b385c7596aed72274b | 9  | 0  | 3  | 19 |
| 1850b5bf5eae704df9ceb6f80fd4f253 | 13 | 18 | 13 | 0  |
| 4232f1bd9c0eeda87e87009eccd4f493 | 5  | 0  | 19 | 15 |
| 8ae4ac7de65ef17068939f147fbd3275 | 44 | 0  | 10 | 0  |
| 034299356c86f4c9f060b68bf6a255ab | 17 | 0  | 37 | 0  |
| 6ce3b26a8cb7ab30f06ddf1ac2cd7    | 0  | 4  | 0  | 0  |
| e49d84fc3db612a643c5c2201adc657a | 0  | 0  | 30 | 18 |
| ff2ec6ee31141f4844409249a498d2d0 | 0  | 0  | 0  | 29 |
| 2e0c0c783ea29500a7bcb99784cb8b0f | 0  | 54 | 0  | 0  |
| d6fcad5729b9329f2923492da065181e | 0  | 0  | 0  | 54 |
| ae62b9db6fca9e47329b8fcf4106aa9d | 0  | 0  | 45 | 9  |
| 4c0bf31c7d081b5baf9e1adbeb31deb6 | 0  | 0  | 0  | 54 |
| 91d80dc717eafe02456676d6da79ab4b | 0  | 0  | 36 | 18 |
| 98b516df3460d93bd20ee8f0199a6809 | 0  | 0  | 0  | 54 |
| 0e610553b4825b0f1e3058a11ec5f49e | 0  | 0  | 54 | 0  |
| 79c33f441bc0f73a703b43blad971a35 | 0  | 0  | 54 | 0  |
| d70cfac58a6697de8085085faeee1ade | 53 | 0  | 0  | 0  |
| 7434f2fe90ea6387786e753ee191a5a0 | 24 | 0  | 9  | 20 |
| a7fa3c58af213b5c789bbe99fa3c6d48 | 3  | 26 | 14 | 8  |
| 30f22a63cb92cb0bb356f25ceaac73bd | 53 | 0  | 0  | 0  |
| 3e85958e692b5c1e218726b921bb21ea | 8  | 0  | 25 | 20 |
| 08183cc96cf94ca5debae016137ca4dc | 16 | 5  | 9  | 6  |
| a0bc873db348b6a18784ece4522fb3d8 | 7  | 0  | 37 | 9  |
| 0aba3a99bab7a73ef0546df9fb2fb891 | 6  | 3  | 7  | 37 |
| f9001f8f52108823d0f325edacf2a73f | 26 | 0  | 0  | 0  |
| 72d921fb958acd5bd37f32e7ffd8943e | 0  | 0  | 0  | 0  |
| 8a0857a9830755498f08c572c56e53ed | 0  | 0  | 0  | 0  |
| f5f39e65d929be1bc6e98dd4720cc2e4 | 0  | 8  | 42 | 0  |
| 7575dd7ddc901d611ffb2c689e930bff | 0  | 0  | 7  | 41 |
| 5243fc5739d655aff138d0366b81f42b | 0  | 7  | 3  | 43 |
| 2c9bccf418c3b239000c277c522b36eb | 0  | 53 | 0  | 0  |
| ccc4281e606f982a152166539f7d9455 | 0  | 0  | 0  | 53 |
| 924b48cf897bb4394fda7e027a079c54 | 6  | 26 | 8  | 0  |
| 99d52d28fa724b91ffa5f6088e8901a1 | 18 | 0  | 0  | 26 |
| 1f6e67293f40f8e06636c787f329fb7f | 2  | 0  | 15 | 35 |
| 773847928b969053c1630f2266ada89c | 4  | 15 | 0  | 33 |

|                                   |    |    |    |    |
|-----------------------------------|----|----|----|----|
| 7de3a1ff94614bbf464cba258776c075  | 52 | 0  | 0  | 0  |
| 8b9790c780bc2f99dd950f54704663a2  | 5  | 0  | 43 | 4  |
| 6309580afa7593560feee669c0c5f714  | 0  | 0  | 0  | 0  |
| eeccc70c26cf818bfe98b291c0f4214e  | 0  | 8  | 24 | 13 |
| a2fd2c6c6deac428e24f276537779163  | 0  | 0  | 0  | 15 |
| 78dc0bf73cc56207fad0df0e78c8b0d   | 0  | 0  | 0  | 0  |
| 481b411304206fccda691024f6892475  | 0  | 52 | 0  | 0  |
| 78caa963f6e482df4a4489475145e72d  | 0  | 52 | 0  | 0  |
| 94a52b02da920c30515d245e5aa9dc6e  | 0  | 52 | 0  | 0  |
| b9b039d64197d2e401094bc8ae5e07e9  | 0  | 52 | 0  | 0  |
| 0273c4e85609a2713fdc972e29ae4ffd  | 0  | 52 | 0  | 0  |
| ac2a83a6b846ef0f6f3a5ab9533e9cd5  | 0  | 52 | 0  | 0  |
| 0d8578a76a12da3c01f56908a81c024f  | 0  | 0  | 43 | 9  |
| f0cf2c1ef5748cc03d718f710d6c6fb8  | 0  | 0  | 0  | 52 |
| 11769a06d6e93115619df0a4a84f5ae7  | 0  | 0  | 0  | 52 |
| 626f50361637147cc503b81a98c7bd71  | 0  | 0  | 0  | 52 |
| 5eeb927043a8fed6119b52748a2f05d   | 0  | 0  | 0  | 52 |
| 6f4eb45f97c32dd354adb911a5e731f9  | 0  | 0  | 47 | 5  |
| 1cd77a05c8518eabf0975646cfa24a6e  | 0  | 0  | 47 | 5  |
| ca3f662bd2eb26080657dff76102efe   | 51 | 0  | 0  | 0  |
| 34c8a415be153a42d483b5de2cf5abe5  | 51 | 0  | 0  | 0  |
| 49e10a4efc1e452e28b61152e63abf0e  | 51 | 0  | 0  | 0  |
| a40cd09e99cabd9c5bc93d0bb1e102f8  | 23 | 24 | 4  | 0  |
| fe97ed42ba0dab1a2e2350e5894d8bb6  | 33 | 0  | 0  | 0  |
| 4504f7138eee8c7c8c6a857030ac2b4d  | 23 | 0  | 28 | 0  |
| 2e93d29f9240391b7321ed60dd0fde11  | 51 | 0  | 0  | 0  |
| e8e4e1bdfbd1e829c7ee5dd7a8fa6225  | 34 | 0  | 0  | 0  |
| 039bc0c91d011ed5321dee631285921b  | 11 | 0  | 12 | 28 |
| 62a73bd833bf0aff0e84d036755b15e1  | 4  | 0  | 13 | 34 |
| f5484e23871e7d61bb02ed36d82e9392  | 4  | 25 | 0  | 2  |
| 2257d58ebb22a4168da71744993d1ce9  | 0  | 42 | 0  | 0  |
| 44bb22cde9a43f3e45e5d6453c58d9b2  | 0  | 0  | 24 | 0  |
| 595b8358d03a6659c8e5d8d663757cd8  | 0  | 0  | 0  | 25 |
| f1a1299bfa4bfff69f3f8e13ec980a459 | 0  | 0  | 0  | 0  |
| c0506b015cd97f093005b0755a479f8f  | 0  | 0  | 0  | 0  |
| ab0dd1266b3d4bac11956368acc77d67  | 0  | 18 | 15 | 0  |
| dd4374914741c11d9a7b25f18964a2fb  | 0  | 0  | 0  | 0  |
| f5190a727fe8c39a2a944f9eeb0da241  | 0  | 51 | 0  | 0  |
| 5ff441539a0a4f8e0bda958576b1889c  | 0  | 25 | 20 | 6  |
| 4c804a2b7466ab2936809a4832338daf  | 0  | 23 | 0  | 28 |
| 66b344d85adfe4b9bf5aa69eedaa0862  | 0  | 30 | 0  | 21 |
| 5f983833119133c2078e56b4de88461c  | 0  | 26 | 0  | 25 |
| 5603df2bcd77c36eae991cecdf7d3345  | 0  | 0  | 37 | 14 |
| 20cb912cf4ae94a7b3631a93d3026222  | 0  | 0  | 0  | 51 |

|                                  |    |    |    |    |
|----------------------------------|----|----|----|----|
| 39d5b9fbcfec31b72b643f603f59c7   | 0  | 0  | 0  | 51 |
| a523314a3ac0feddfa465a742b17d70b | 0  | 0  | 28 | 23 |
| 46d26be9df2173abdb6742d09342adf8 | 0  | 0  | 51 | 0  |
| e8264eea9923134b086b34bf479e5d44 | 38 | 0  | 12 | 0  |
| 2c86b238dac60f1d6e7af826f4d8e389 | 6  | 20 | 0  | 0  |
| f21e823acc3af3b9dd2bc534f773491c | 7  | 36 | 4  | 0  |
| 630a5581d45fdcc0d38ef00d44f29133 | 50 | 0  | 0  | 0  |
| 3574e5ed4dc37bf80fae20e3e3cd1cd9 | 2  | 21 | 21 | 0  |
| c4d6c2a983281cffa7317ceb844f5a49 | 50 | 0  | 0  | 0  |
| 22f2faaf07850463d606a27bbd0334b5 | 15 | 0  | 21 | 0  |
| 211a382d9021aa396707929cdfb33018 | 18 | 0  | 13 | 19 |
| e49a70cd9e28d609844bc5d995e235b7 | 37 | 0  | 0  | 0  |
| cf977f487584e6c47095883076fa116d | 18 | 0  | 0  | 32 |
| bdf135ffeb9f363bcaeda305795d47c3 | 8  | 20 | 0  | 0  |
| f718bbd9d5bf6421090f85ed1640eab2 | 0  | 0  | 0  | 0  |
| a71b8e734b518fc13ffd474a8cb0da5b | 0  | 13 | 0  | 0  |
| 8dd3df405fa857130cf97a03dfe06db4 | 0  | 23 | 0  | 24 |
| c0501abb3d4362a522e9be50c288379e | 0  | 0  | 26 | 0  |
| d065821848bf88122e87a43131b2e23a | 0  | 16 | 0  | 0  |
| 31c04be27f48dbb1a3212904a40bb318 | 0  | 0  | 0  | 0  |
| 1f78e7fc761f39d51f820df822af9fd2 | 0  | 0  | 4  | 40 |
| 654938ca12de928d75ceab77dc7f3231 | 0  | 0  | 0  | 0  |
| 66619dc062d80fb774e7df1ec7526707 | 0  | 22 | 0  | 0  |
| 9dee0e9fe7198fc4cfea1e6252178aee | 0  | 0  | 3  | 41 |
| b54b7fa4b2bdb89b75e2c28f0856f382 | 0  | 50 | 0  | 0  |
| 5f19f082bae435ce9bade8a63f17fe62 | 0  | 8  | 0  | 42 |
| b729ae621afb3d1c319e3bf926a05ca6 | 0  | 20 | 0  | 30 |
| 901a5b68632381a24798239a82ffbb41 | 0  | 50 | 0  | 0  |
| 2afe588b1608838be5dfdf13875e8ed8 | 0  | 0  | 0  | 50 |
| fa71cebb4806f3e23bf3e5ee7df41fd7 | 0  | 0  | 0  | 50 |
| cfb469d5861a8670de510eb34f68734c | 0  | 0  | 0  | 50 |
| e4d116ed530be2e8d196ef3a1ce03278 | 0  | 0  | 0  | 50 |
| 06a2edd33a01e66fbf60e45bf306f90a | 0  | 0  | 0  | 50 |
| e47d5a5ae6bcd33599b6d956cb880ab6 | 0  | 0  | 0  | 50 |
| 4ac65005f21b77bccca56fa0b2db6db8 | 0  | 0  | 50 | 0  |
| 078af835efa2dd6c21f7be9f97a199ed | 49 | 0  | 0  | 0  |
| 8e3e81795ec698876e812d062027f9b5 | 49 | 0  | 0  | 0  |
| 0232ebb9da2505f80eae38072145c964 | 49 | 0  | 0  | 0  |
| 406222c3ea5f7031c11018cc01679ec1 | 49 | 0  | 0  | 0  |
| a3b118c92a25305ccf7e637af681e87a | 20 | 0  | 18 | 11 |
| 479014d9cf478c937563dc64f1ddee   | 0  | 6  | 12 | 4  |
| 02054a7edab2500ba83747e1998c0a89 | 0  | 0  | 0  | 0  |
| b66fd7f87624840a7bf7d4f9a7b01cc0 | 0  | 0  | 0  | 0  |
| d61617517d8485e6c916a877a8b68181 | 0  | 0  | 0  | 0  |



|                                  |    |    |    |    |
|----------------------------------|----|----|----|----|
| 72adb5578b07bb1b8c898b0831ec6565 | 0  | 0  | 0  | 0  |
| 370c613801931afbc41fd0fdf06896c1 | 0  | 0  | 0  | 24 |
| d021914bbb5679f70624a5867793ae75 | 0  | 0  | 0  | 0  |
| 5821eb3afacc49062af547df6611e071 | 0  | 49 | 0  | 0  |
| ffc41a16c4678721352240bf83867325 | 0  | 14 | 35 | 0  |
| cc96f2c6030fced59fc93cd16a7506f8 | 0  | 49 | 0  | 0  |
| 78173e75ed9d27e6d9bcb8e62cf5c4f4 | 0  | 0  | 0  | 49 |
| 79b6be62b5d795983ae863162544ab64 | 0  | 0  | 17 | 32 |
| b11b37e4649bbfd7dc09701253150cb4 | 0  | 0  | 49 | 0  |
| 334372229c0efd0f71a202e636dee28a | 48 | 0  | 0  | 0  |
| 2a22ea27e5cfe842f2affe4dd132468b | 27 | 0  | 0  | 0  |
| 9519eb1a8abbf9321682c191b68121ea | 19 | 12 | 11 | 0  |
| 61e9101ad971f966b977ed7b0cd093eb | 25 | 9  | 0  | 0  |
| 011de01fea747f174590adf95274034d | 5  | 8  | 0  | 0  |
| 13513c1ebe4a53af051c05810a89b4cf | 17 | 0  | 0  | 31 |
| d9ed26ad62d804b1b0f2edaf1ff42715 | 24 | 18 | 6  | 0  |
| 62d50bf3ecc856db39b9a61cf06ab35a | 0  | 0  | 0  | 0  |
| 32ac60418494a8d412e0af89b2f69903 | 0  | 0  | 0  | 0  |
| 6bdcc2793fe86a8d8b2b8e439433deea | 0  | 0  | 0  | 0  |
| 5f05e64479db15be9c8a188cd92a3bc3 | 0  | 0  | 9  | 7  |
| 867074e7b7d650a6de3c0995cb7cee1e | 0  | 0  | 0  | 0  |
| b118c6081976d304cf01832a2ec0d8d8 | 0  | 0  | 0  | 0  |
| d855ef60341372c69fc8a14b4cffac5b | 0  | 0  | 0  | 0  |
| 76777627bacfca9a1a461b449fe85cfc | 0  | 0  | 45 | 0  |
| d65f8b8bbdfb06bfa0247bd63b28d728 | 0  | 48 | 0  | 0  |
| 489248125b15c91c04649f5c21c44b1b | 0  | 48 | 0  | 0  |
| 62071c254f2ba01361853c8531894307 | 0  | 37 | 11 | 0  |
| 0539a06355e397e4880e6dca48e8d0f0 | 0  | 0  | 30 | 18 |
| 54e2c5a56597fc9890233b46e8f74d7d | 0  | 0  | 0  | 48 |
| 08582f67fd0f9c2d815515864e77c318 | 0  | 0  | 0  | 48 |
| 25f209a0d4c2444b04700c8ae2785111 | 0  | 0  | 0  | 48 |
| 5f3968919cbd80296860907f4ae5b243 | 0  | 0  | 0  | 48 |
| 8b8961c952c6c0e91f26526db29cc298 | 0  | 0  | 0  | 48 |
| b158f8a9b62a16c281d4df7314aac781 | 0  | 0  | 19 | 29 |
| 89538180d1010df5acd24d2baa8d8d8c | 0  | 0  | 0  | 48 |
| d4a8b72fae2fe84c9645229314c1107e | 33 | 12 | 0  | 0  |
| b39e0253f49831323fd28738eb80839a | 39 | 8  | 0  | 0  |
| badd303bc9dfea6efb893a984bd6c7f2 | 11 | 0  | 6  | 0  |
| fa77bd49b578a4fae135545ce3e95226 | 47 | 0  | 0  | 0  |
| 227f75f8c8a295b4c3bc60345ad09723 | 7  | 10 | 30 | 0  |
| 4d85444d269464263efe62dd5b847a2a | 47 | 0  | 0  | 0  |
| 2e929a4f590f5ff1cde379f72e9a0ede | 25 | 22 | 0  | 0  |
| bb9603d4efb92bcf80d8463ebcad51fa | 0  | 0  | 0  | 0  |
| 0a4c80a45fd313c1b136b711878a3f4b | 0  | 0  | 27 | 10 |

|                                  |    |    |    |    |
|----------------------------------|----|----|----|----|
| 7bc568e5732ea6583d2aa00a58c72e52 | 0  | 0  | 0  | 0  |
| 6c2e9bc0ce484fd0695da668ea58ee02 | 0  | 0  | 0  | 0  |
| 2dcfab4a85783d571ec18f40cfb0e6ea | 0  | 0  | 0  | 0  |
| eeb86941b52a2668ced697aff1433255 | 0  | 47 | 0  | 0  |
| 5d0bc5ed6ffaf823156081065587bced | 0  | 0  | 0  | 47 |
| b474daabb2b6b8691b12ad01733cf190 | 0  | 0  | 0  | 47 |
| 293c00aa14be5e281287b31facadfd90 | 0  | 0  | 0  | 47 |
| 1e0a29753c00a7546c7939175f29e756 | 0  | 0  | 0  | 47 |
| d506018df6cade628c986779ca63513e | 0  | 0  | 47 | 0  |
| ce0bffff388170f87c4e781231501639 | 0  | 0  | 47 | 0  |
| 0d03838ebb58582611781180dac04d39 | 0  | 0  | 47 | 0  |
| b9d432f76ff71a5e316265afa6c25758 | 16 | 0  | 22 | 0  |
| 3102ac9c1533e0b8f696da017ceb6c67 | 14 | 0  | 0  | 32 |
| 3d8cfd29cbd166ed4aaaff95744c99ae | 11 | 0  | 0  | 35 |
| 53ad00a31406c461507816b73f6e69a7 | 35 | 0  | 0  | 11 |
| f72ea3cd46c720b071b79916607c8ef2 | 12 | 8  | 9  | 8  |
| b49972eb9de05ea9b34462e2cb3df3a7 | 4  | 0  | 7  | 35 |
| 1d3780dc4c4fcaa7b48516097fd024b4 | 0  | 0  | 0  | 0  |
| ec81c78dd571d5e77aab2f8afd3ad04e | 0  | 0  | 0  | 19 |
| 0d3a650dad0a35abc188b2b24a56da5d | 0  | 0  | 36 | 0  |
| 3c869328bc0c59a253bcd815e0f4e358 | 0  | 0  | 0  | 36 |
| 0a683bba659022c4a7e55f19ac1b16e4 | 0  | 0  | 0  | 0  |
| 97ec0a69e85740c442708b559a5dd80c | 0  | 0  | 0  | 9  |
| ce7037309313a910d03a68d23200392c | 0  | 21 | 12 | 0  |
| 148e0d37315c2974b570368b369b7964 | 0  | 32 | 0  | 0  |
| 6858d68019e362b46e6588f7b3c9181d | 0  | 0  | 0  | 0  |
| 0fc958e53d187df1d3487744d4a289cf | 0  | 46 | 0  | 0  |
| a197bbe66a058ea9d9f7e4aaf7f806b2 | 0  | 46 | 0  | 0  |
| d3439c080dae42093b15ffd35d16e857 | 0  | 13 | 33 | 0  |
| e19e07351ddbe8e07ec44f0c63e1b6f6 | 0  | 3  | 31 | 12 |
| 094bcb9c36214884aaad47395e8ae9c7 | 0  | 18 | 28 | 0  |
| 16eabfbd12ddd8fff87a2e4cebbe40cd | 0  | 0  | 0  | 46 |
| bd4c438cc1c9b0bba31c282bc0d8d9a3 | 0  | 0  | 0  | 46 |
| 9a8ed2ea7bbb2ba004437bddd8189d33 | 0  | 0  | 0  | 46 |
| 17e26ce19d528dfaa6817225ca904917 | 0  | 0  | 5  | 41 |
| 0e6ada3f7a8b803d39f891c819b3f207 | 0  | 0  | 22 | 24 |
| baff9ec649998c28a83ef839e1903def | 0  | 0  | 21 | 25 |
| c93154edb03e67c03e12e9321e84442c | 0  | 0  | 0  | 46 |
| abe78507a33b0ee65e55ed2c28deb1af | 0  | 0  | 46 | 0  |
| 34cd05450b4d2485be543c97768d7163 | 0  | 0  | 46 | 0  |
| 945c7be7c2ef42dacc3e0e701f7debd1 | 0  | 0  | 46 | 0  |
| 9c4bc8e1553bd1002af290d119bcdd2c | 0  | 0  | 46 | 0  |
| a063fa5d48dc41710cb17b2c0926a58f | 25 | 0  | 0  | 0  |
| 604d0f84f8aefe8f7c316901582a1009 | 5  | 18 | 0  | 22 |

|                                   |    |    |    |    |
|-----------------------------------|----|----|----|----|
| 02cde5d9eab235bd94f010b973b0f119  | 16 | 25 | 0  | 0  |
| 763bbce07ae23be4e7e307608136c4d0  | 37 | 0  | 0  | 8  |
| 7c3818e561fa1da160f5a830ffba8895  | 45 | 0  | 0  | 0  |
| dd1fc38555f7320b8dd346f638e0ebe4  | 43 | 0  | 2  | 0  |
| 3bbf54b764790344f7f3f78fdb2500d4  | 17 | 0  | 0  | 28 |
| ec92d1d072139cdf4f75cacdc1b46681  | 14 | 23 | 0  | 8  |
| 3ef42d575b1946132924058d83b07fc6  | 0  | 0  | 0  | 0  |
| b80ce966ff4a3ec2060c7bfb2fa17092  | 0  | 0  | 0  | 0  |
| cc22dce5e581427ad38fd43d17b025f9  | 0  | 0  | 0  | 0  |
| 60809b83e3b09b7e3889b445c6f3a962  | 0  | 0  | 16 | 17 |
| 946a1ed41e8a4775ceb0e5a7517176e8  | 0  | 30 | 0  | 0  |
| 48de1df653de65061ef9e031856cd19c  | 0  | 0  | 25 | 10 |
| bbb409f2a2ea62a89825882182288af6  | 0  | 41 | 0  | 0  |
| 283d5866805fc8aae75ef98f63204336  | 0  | 45 | 0  | 0  |
| 59a5881c3be69dd9445b08867cceeab0  | 0  | 9  | 0  | 36 |
| 000fe74555b8d995714372caccc35381  | 0  | 0  | 23 | 22 |
| 8a828fde4782b435fa6bd7c4b9be5fd4  | 0  | 0  | 12 | 33 |
| 0b1d892280956509d69062051de3a34f  | 0  | 0  | 0  | 45 |
| b234806aac25036af747f4069f65e808  | 0  | 0  | 33 | 12 |
| 24aecbaf848df9ac30c18f2a34c891a5  | 0  | 0  | 0  | 45 |
| a694578cc7c88500bda288375995f22f  | 0  | 0  | 0  | 45 |
| 1dd13abdb6b268afda8bcddc33089b603 | 0  | 0  | 45 | 0  |
| b4fbc44defd582bbbd7891f2e9e13479  | 0  | 0  | 45 | 0  |
| 8ed40bc563ee241ceebc51120f9eef78  | 0  | 0  | 45 | 0  |
| e15fe55bab0fc1d9fe14203ea83e64c8  | 0  | 0  | 45 | 0  |
| 155f4cb837ebf0663872ad6ec085003b  | 44 | 0  | 0  | 0  |
| 147c3aee5bca7b1543a806520b987175  | 44 | 0  | 0  | 0  |
| 9a176553bd67cf96f62bed792af0674b  | 20 | 0  | 24 | 0  |
| f89d62dd8057766e2894d35e756944ca  | 15 | 16 | 0  | 0  |
| e35bd04142c5c56b5d553fd183957f4a  | 44 | 0  | 0  | 0  |
| de125838c70fb8ee9ce31be29fe11558  | 44 | 0  | 0  | 0  |
| 373772eda01c7bea8519a20d68b08482  | 24 | 20 | 0  | 0  |
| 9289699aee8d48ade59ee76861d2febd  | 3  | 5  | 5  | 20 |
| 59ea3908e1de6a7f0c4789e8e3b767cd  | 0  | 0  | 21 | 0  |
| d1bddef3b54befd698209980594e493b  | 0  | 0  | 0  | 0  |
| 0c35d215f93014d57c3a7bb5552e62a1  | 0  | 0  | 0  | 0  |
| f69076b135c9c0f44886823a3a6600ba  | 0  | 10 | 10 | 0  |
| 5d442f61108c7664c9263aac0f2a1768  | 0  | 10 | 14 | 0  |
| 8af565f9a7da854fa1cdf3609097c655  | 0  | 0  | 0  | 0  |
| 284c09422c1eb1ee9988a627604fbb90  | 0  | 0  | 14 | 24 |
| 4ef39e9fea47e08af09c6e23dea306c6  | 0  | 0  | 0  | 26 |
| 096a36ae43ee6b2320ae47e6365f7063  | 0  | 0  | 0  | 0  |
| 19fb47cef205a342eac3e495a6489471  | 0  | 0  | 0  | 0  |
| 137dae45b6f7daf9893c3e3aa65809c   | 0  | 0  | 0  | 32 |

|                                  |    |    |    |    |
|----------------------------------|----|----|----|----|
| f3693f841ddf6e408f6761f448c9dd2b | 0  | 19 | 0  | 25 |
| dee298ac720123f891776bbf5e4bd888 | 0  | 13 | 0  | 31 |
| 59efb8df1e76f7d941350c385c66dcbc | 0  | 44 | 0  | 0  |
| 35a7a4f8d3a3d5df664a070fa9c7fa2d | 0  | 6  | 19 | 19 |
| 3fb5bdaf853c31633b224627924e2b7f | 0  | 3  | 0  | 41 |
| 35832cbdb89fed76ff392fbd3e4f39bd | 0  | 0  | 0  | 44 |
| 4d25892ae3773026fa88b50dfef39759 | 0  | 0  | 0  | 44 |
| cae454a26734c67a96bcd993af7900d  | 0  | 0  | 0  | 44 |
| 60c4f7092db0e69e3db4df79d6e0a164 | 0  | 0  | 0  | 44 |
| 307807c1ed0f83f78e2a89947b1a8231 | 0  | 0  | 0  | 44 |
| 23f06b2262517599345a31ae4e9a691f | 0  | 0  | 13 | 31 |
| ddc2493d26736aa7708f212163cdd320 | 0  | 0  | 0  | 44 |
| b2fc68a9dda12db6d1db7d044c93eed3 | 0  | 0  | 0  | 44 |
| a0dd53adb261b2fb3b25e842c4fdb883 | 0  | 0  | 44 | 0  |
| acf84c0d4902058c4c7b8d53ffdb1a36 | 0  | 0  | 44 | 0  |
| 8160a4d739ea8cf06c76769f5ddf7255 | 0  | 0  | 44 | 0  |
| f1ec44055ffea41f94b6c1c8587c1515 | 6  | 0  | 6  | 0  |
| c5e2910e0b56b43e1b969a6c9cb72441 | 21 | 10 | 0  | 0  |
| 396834182c77a3a5f5f1aef6a3b35899 | 43 | 0  | 0  | 0  |
| c8058760fac5dfe5af0ede65ef125c0f | 4  | 0  | 10 | 29 |
| cbe5ae4334d1bd1ef3d90c1ebc29c0de | 43 | 0  | 0  | 0  |
| c12824d4f207121d5f0b43568dce3db9 | 27 | 0  | 16 | 0  |
| 22291a1b7111320d869bde4ee19e835f | 0  | 11 | 0  | 0  |
| 26ca8c6cfd20bd863f5e3733ac78cafc | 0  | 0  | 0  | 0  |
| 3029d48f5bbb237719fd69bd91113e3e | 0  | 0  | 0  | 0  |
| 61d0b0f8008a80bca40c546a86934720 | 0  | 8  | 28 | 5  |
| 84d078870a242270dd1c56bc0add2a0c | 0  | 0  | 0  | 0  |
| d1f6bdbb6ef0c62f79b6a51b770dfda7 | 0  | 38 | 0  | 0  |
| 2625ecfe832f50b6507234cbe9f35f65 | 0  | 0  | 0  | 0  |
| 0e99cb7c248eb47cd2064144debfa2e  | 0  | 0  | 0  | 32 |
| e4208c8e74247c52b322137a439ad17c | 0  | 0  | 20 | 0  |
| 40c22f73e43156c8b2ec8f2b88c1d3bf | 0  | 0  | 0  | 0  |
| 6d3f4243f024d2d47a15b901d878ae07 | 0  | 0  | 0  | 37 |
| 3de19df70e2274969f8d7c9609983e96 | 0  | 36 | 7  | 0  |
| 78e1a4d69b9078f179df3745e0516c9f | 0  | 43 | 0  | 0  |
| ab73a2ba6788138b6cd6d63bfb4a60ea | 0  | 43 | 0  | 0  |
| e78bca98b03ad62edc662845959f3522 | 0  | 0  | 0  | 43 |
| 4c934d71c527938b898cfa3c93d2c0bf | 0  | 0  | 0  | 43 |
| 92fadc7d0cf9c25b0e6005329c239830 | 0  | 0  | 0  | 43 |
| e4e70761949e31e8c4990d3e53491cd0 | 0  | 0  | 0  | 43 |
| 04e268ed72107dbd2d3d4081d88df3ec | 0  | 0  | 25 | 18 |
| 9124d6ee8c113d53061c54dbc750d7a6 | 0  | 0  | 22 | 21 |
| 043929bc335f80aa2d3194f47393e6ff | 0  | 0  | 26 | 17 |
| 0b7d54706c526f15676efc7d8f0bcc95 | 0  | 0  | 0  | 43 |

|                                  |    |    |    |    |
|----------------------------------|----|----|----|----|
| 50d78f1c4b6e4caa046300e726d8e0ec | 0  | 0  | 43 | 0  |
| 14aad9540780b1175566c9327c3c993e | 0  | 0  | 43 | 0  |
| 3ed874c407135468dc05b21d15f7014c | 0  | 0  | 43 | 0  |
| 666f3ce23e2c99208dfd5d6751339578 | 0  | 0  | 43 | 0  |
| 52859b56010fa5efa180f32475091cc0 | 42 | 0  | 0  | 0  |
| f82def37e8543f757fad5257a104301b | 42 | 0  | 0  | 0  |
| 957a1a2b4d358e36f8914d3de3a3b0d9 | 42 | 0  | 0  | 0  |
| 9d9527726a5235653d84fa08b309895d | 42 | 0  | 0  | 0  |
| f1a644833e42057ca6d0274854ef2497 | 15 | 0  | 14 | 0  |
| ccb9bb69580a14b8705dcbc418be5d95 | 23 | 6  | 4  | 0  |
| a1bebdb313d411ae460385f25794aa96 | 23 | 0  | 0  | 19 |
| 3fd604ed40c86a0f13cf293cc0f29d38 | 21 | 10 | 0  | 0  |
| 3c39efaa00aa1fff2c3fd043a43ba49b | 9  | 25 | 0  | 8  |
| 04d34c2af12c10d8dd3cc067e23f8863 | 5  | 26 | 0  | 0  |
| 0a38ed4e31fea09ac6a87d65bfa3d675 | 36 | 6  | 0  | 0  |
| 5ec247029616c50ba8f3971634504851 | 5  | 0  | 6  | 31 |
| 8cd32353523446e255a650bfc76a44ab | 0  | 22 | 0  | 0  |
| f330ef48a0c2f700d277c9801bd6239d | 0  | 0  | 0  | 0  |
| 198d1f72a58c09e2501c6cc5c58c9518 | 0  | 0  | 13 | 0  |
| 4aa6049159cd4eae8252a0856f551033 | 0  | 0  | 0  | 0  |
| b3f8f0040f2a7f4be2f14f0857fcb701 | 0  | 0  | 0  | 0  |
| b932b5dd04a513144b59b8d76e2b64d4 | 0  | 0  | 0  | 0  |
| b448755d1bbdfbdaea1ff2b08d481814 | 0  | 0  | 0  | 22 |
| 055bd7860459e11bf9e319e44e9cdba6 | 0  | 8  | 34 | 0  |
| 6ccb0282ef131638c31e4deefc2cb95c | 0  | 42 | 0  | 0  |
| 01fc8b5efe0fe68de684dab2055f777e | 0  | 0  | 0  | 42 |
| d86433c163f07005b76eacd09f1320f6 | 0  | 0  | 23 | 19 |
| f8e9d5402f1b7b4fbc3c7681daf6bec9 | 0  | 0  | 42 | 0  |
| 7070d2056b1cf1413a7960492d56b325 | 0  | 0  | 42 | 0  |
| c1c4829f1afe84957cbe9f49c84f5095 | 41 | 0  | 0  | 0  |
| a92868999532235682c442869f534095 | 17 | 24 | 0  | 0  |
| d695c1b7f6b39d4e8b3a97e85a148ea5 | 16 | 25 | 0  | 0  |
| 741eebab92377e12a3f7373a06cf6404 | 31 | 0  | 0  | 4  |
| fd68ea082622eefd6a41b073e7a5bb05 | 11 | 30 | 0  | 0  |
| 29d31a7da55158be399f09125b421a64 | 32 | 9  | 0  | 0  |
| cbf10f472b66e2178f38c22a642f3e3e | 8  | 0  | 10 | 0  |
| caf19c4ab84f7cadd01d00ee3ab3b995 | 37 | 2  | 0  | 2  |
| 9dbb29468a5395a903f0dd1b4105e500 | 3  | 0  | 2  | 24 |
| a93c6a62a28b9ae3342f9050ea5c2b50 | 11 | 0  | 30 | 0  |
| b7ca394809603fe3c9ffaba32b48e162 | 18 | 0  | 10 | 0  |
| 4def7bf65cc5288080705583bbc9142e | 0  | 0  | 2  | 0  |
| 53ef0191d05a8c89c374f2a703db36a5 | 0  | 0  | 0  | 0  |
| 09bf1451f92781ae868935a6f194b34b | 0  | 0  | 0  | 0  |
| 2e653bba0694ba67d7a3c21d6eba9c32 | 0  | 19 | 0  | 0  |

|                                  |    |    |    |    |
|----------------------------------|----|----|----|----|
| d2ae2206f7bfc2af48ea78ae59d86b0c | 0  | 0  | 6  | 0  |
| 1abca884f4191948b8964b0e2dcf9ca  | 0  | 0  | 3  | 25 |
| 8bc596e39024d056ee0d88bab1615385 | 0  | 38 | 0  | 0  |
| 4b472f5e3dc45bd80c41efa4809bc59e | 0  | 0  | 0  | 0  |
| 20db58ae91f330dfab83d5d564216979 | 0  | 0  | 0  | 18 |
| 03c305cdcbd4af7902dfd3195d771d74 | 0  | 0  | 0  | 0  |
| 9dcacb62d4d932202eaf787ab5c29a5a | 0  | 0  | 0  | 0  |
| df3f67adae3e04e55274a033a40c1e2d | 0  | 33 | 8  | 0  |
| 99b8143247b5a4fa1d53d8a5fce137b3 | 0  | 18 | 12 | 11 |
| d583c06a5bc58ac3fe9b682cfb574770 | 0  | 41 | 0  | 0  |
| 8a32c22e844b2e768737f1606dfbb751 | 0  | 0  | 16 | 25 |
| 7d5d34017a777810f7848b9317788b38 | 0  | 0  | 0  | 41 |
| a286a358fd0587fdf377d22f93bbb615 | 0  | 0  | 0  | 41 |
| 3d94575f2e5e7584f4f2f588a69e7dce | 0  | 0  | 0  | 41 |
| 5b48ad6ba618b1f02e3c3df59a386197 | 0  | 0  | 0  | 41 |
| f91fe64ea3c95199a9096a031956c8dd | 0  | 0  | 0  | 41 |
| 5229fdc6b0918e1c30c008437d2a8503 | 0  | 0  | 41 | 0  |
| 2606febe2dc6160381cf3d60cfeed5a5 | 0  | 0  | 41 | 0  |
| 81cf4d795c63f78a2f3364bdf143d535 | 0  | 0  | 41 | 0  |
| 447682b3ca9ed463ef44d64642617d6a | 0  | 0  | 41 | 0  |
| 5cbd086d48bb541fa260b380c16e77b9 | 0  | 0  | 41 | 0  |
| bcd130654f71dd107a4cf90d8933dee7 | 0  | 0  | 41 | 0  |
| 93bcaec45b94fc235e56c99a4813e1fa | 0  | 0  | 41 | 0  |
| 8cd62ed3e5cdb0ea459a7deee5b26803 | 0  | 0  | 41 | 0  |
| 844b6e7bd5b8f0862634020c1574eb49 | 0  | 0  | 41 | 0  |
| 97dfb71585624e3236e7072b099b19a1 | 14 | 0  | 17 | 0  |
| 8b1b44ce298d1096a92f1cd560e00d88 | 32 | 6  | 2  | 0  |
| 9f0e5cd7c850164f1bfb59be07e1a8ad | 23 | 0  | 0  | 0  |
| 189ee8cd339f34e482c79cc12b836f58 | 8  | 0  | 32 | 0  |
| c3cd4efb9e58f59e4df65524fb012ac6 | 26 | 14 | 0  | 0  |
| ac9895f7e794de25df4c40b25776909a | 6  | 0  | 0  | 34 |
| 567bd5f7bf763b561c87fa8d2a0c441a | 6  | 20 | 8  | 6  |
| a769fd25cb4cb3e65fb0b5f752ddf4cb | 2  | 6  | 24 | 2  |
| aadd4ae968cb9d7ed721adecde6d33cf | 0  | 5  | 6  | 4  |
| 44db624e6dd14daf39bcbe0aa0ab2de4 | 0  | 13 | 0  | 0  |
| 317f8efb92482b265782e99076cc82b3 | 0  | 0  | 0  | 36 |
| 5b4779caaaf58684ee8481d7299cf850 | 0  | 3  | 0  | 0  |
| 4f26d1a336fdf0dd736fcc1a4e0ef14b | 0  | 0  | 10 | 6  |
| 9432d8957aea2eebb0e15acd4bdec901 | 0  | 0  | 0  | 0  |
| d0afbade7e7a61bbfc0321167af53afb | 0  | 0  | 0  | 18 |
| 9327225d79004d27e7fdde1ae7b42a21 | 0  | 15 | 0  | 0  |
| 9348c098c5338e76c598229a16ab0b7a | 0  | 0  | 0  | 0  |
| f444efba1e58a00c89bf388a864702d3 | 0  | 0  | 11 | 9  |
| 9ebd60945717624bb1e40367c9663acb | 0  | 0  | 0  | 0  |

|                                   |    |    |    |    |
|-----------------------------------|----|----|----|----|
| fe5e674e802c66719f50b7882fd16a5b  | 0  | 40 | 0  | 0  |
| e6fb1c0d4dbc578341d48fcd1c526557  | 0  | 40 | 0  | 0  |
| 2e9368f84f4a93424f7fe33293c6a61c  | 0  | 17 | 0  | 23 |
| 750faa6e6a3e61b3193f2bc017ddfb90  | 0  | 40 | 0  | 0  |
| 45647a463fe3ee4c6a8918615f450ebf  | 0  | 40 | 0  | 0  |
| bbce5fd2b530446e7618f24cd3d70aff  | 0  | 11 | 10 | 19 |
| ba0173159054eaeaacb9901338c0e380  | 0  | 40 | 0  | 0  |
| cdd07976a8984507bccca243c80c255ea | 0  | 6  | 34 | 0  |
| bb18e4053998e7057d2a2f5700197f71  | 0  | 0  | 0  | 40 |
| acda87a7d02017efefca9ad60aa3b7ae  | 0  | 0  | 0  | 40 |
| 9be26abbfb13d44c98846d11ded23d4c  | 0  | 0  | 0  | 40 |
| 109ddf4908d17fcb8fa63e5e52c54122  | 0  | 0  | 0  | 40 |
| 768d1bf7d871ec2766f9e5ae7584771b  | 0  | 0  | 15 | 25 |
| 633f87f9e678b8c17062c8ba298349dc  | 0  | 0  | 21 | 19 |
| ccabdf50f77c079ef67517a9620c196e  | 0  | 0  | 0  | 40 |
| 89dcd2f0a076f929fb0c6e425e230474  | 0  | 0  | 40 | 0  |
| e3c534ecdc98e5fca8873802d28a9bab  | 0  | 0  | 40 | 0  |
| 5f9ed885132c90a66a4c4008acfdce32  | 0  | 0  | 40 | 0  |
| 19f38e5b8c6faa505d48560d990130be  | 0  | 0  | 40 | 0  |
| fdd728f0cad6e3138ffe27843839214   | 0  | 0  | 40 | 0  |
| 03a7c251bc1d443f9bfe51b618c31081  | 35 | 4  | 0  | 0  |
| 2a4fc1dff17ec8086680ff97206029f8  | 10 | 20 | 0  | 9  |
| e666a774d38bf5c9464478869fc1c136  | 3  | 0  | 36 | 0  |
| 1635a283ba1e5d69100c6f0b3de43882  | 10 | 0  | 29 | 0  |
| dc0051767275e38c73687f28d972ccb   | 15 | 0  | 24 | 0  |
| 8acbfb83827cef6d3d34623b2d2dfd45  | 23 | 16 | 0  | 0  |
| 4381a444ba7d29b549e4bf81da6bb24f  | 4  | 11 | 0  | 0  |
| 20d27f2d310ac2a005c98c4ac101543e  | 9  | 16 | 14 | 0  |
| 10bc59839975144549600d8b391071e2  | 21 | 10 | 0  | 8  |
| 480144965a370ebb2343c46a19cd3dd5  | 39 | 0  | 0  | 0  |
| 018af7156c937e6cd61b66c5f27bbd7f  | 0  | 0  | 0  | 0  |
| a089501c8a04abb3bd413339b5a8393c  | 0  | 9  | 6  | 12 |
| 320a99a4354dcf2ab8c8c9f6ba5a62ef  | 0  | 0  | 0  | 0  |
| 54a04d57c00fea25e17767855a8b0059  | 0  | 0  | 0  | 0  |
| 83f1aade4613cb230f61c9b2ee8e5a1d  | 0  | 0  | 0  | 0  |
| 04fae0bea1ffff869c05eb37ec09dd76  | 0  | 0  | 0  | 0  |
| 98662d708bed7aab4e34b0d832d8aaac  | 0  | 0  | 0  | 0  |
| a953c38c2dc5b7cd766465ea5a08b598  | 0  | 0  | 0  | 0  |
| d3deea7c13beaf50d623b5e526108ac8  | 0  | 0  | 0  | 0  |
| 54258c40db58c45832bd0783d21e5aa8  | 0  | 0  | 0  | 0  |
| 7c739be9b0fd0d3939eb7cb0e3ec2479  | 0  | 19 | 0  | 0  |
| ccb1ee18b538b0d826db6241c9234778  | 0  | 0  | 0  | 0  |
| 2c93b139bcd1e1d0e459043d95943046  | 0  | 0  | 0  | 0  |
| 0fe592abf87952672dd9b6e0f02fe681  | 0  | 39 | 0  | 0  |

|                                  |    |    |    |    |
|----------------------------------|----|----|----|----|
| 405c5e55c62592fc0528fc274456efdf | 0  | 9  | 19 | 11 |
| a728d78b49f8c2f99f15860df71703d6 | 0  | 3  | 36 | 0  |
| cc5e98e1515ed22554958e0fecf0b47e | 0  | 24 | 0  | 15 |
| c720ba5ebbac3006e14a397be12d78fa | 0  | 39 | 0  | 0  |
| 5f8476148308af52708d3720fcb96ff1 | 0  | 0  | 0  | 39 |
| 39977c54fe9091fa02816cbbd116cc15 | 0  | 0  | 0  | 39 |
| aa6848a40411edc18068d76a9375fddb | 0  | 0  | 0  | 39 |
| e65d2a3f66326ed350cc1b1bc33e203e | 0  | 0  | 0  | 39 |
| 8bcd4fde174f6087afa298e3559e2c06 | 0  | 0  | 0  | 39 |
| 84db7f905e9ac0e88225b2901ff1bb07 | 0  | 0  | 7  | 32 |
| e370bfc3a1bbbd3f60944557b5f35897 | 38 | 0  | 0  | 0  |
| 7fcf3a4d889dc06ee4704bf094af5109 | 38 | 0  | 0  | 0  |
| 651555abd5d62bb8493d3f71085d4ddb | 38 | 0  | 0  | 0  |
| eead5c9da2f64cb5d3dc53f3d955a521 | 12 | 0  | 0  | 13 |
| f4769eab4590b2abbba2da567667a4c9 | 23 | 0  | 15 | 0  |
| 37a8655b025334ad3da09e7fd4d58575 | 13 | 13 | 12 | 0  |
| b73fe71f8e3c42d56f0a614bd02c516a | 10 | 0  | 15 | 13 |
| f46d5525fe9a374d05c85686433871c7 | 6  | 16 | 16 | 0  |
| de88975314bf0f43fb37c371d3f86cce | 4  | 9  | 0  | 22 |
| bf942fd4caeec9d79e80667604b12b98 | 6  | 11 | 9  | 6  |
| 7b4a1743a42c20bcd77cea49d49b433d | 22 | 0  | 6  | 0  |
| 18844e6c9f0be427f918f08bf69fd0ed | 3  | 4  | 7  | 15 |
| 8d88b306a4f03b6260f9dd3d86fe91c0 | 3  | 23 | 2  | 10 |
| 5b1a29a7535fbbe770b3e0a3e4736857 | 9  | 0  | 0  | 0  |
| 87ad4f634e35f808a17e92e76bad9b24 | 6  | 0  | 0  | 32 |
| 60d45e225b1b603db0b2518536163585 | 0  | 0  | 10 | 0  |
| 8e5179d790291d4c425591fa0d565c0a | 0  | 0  | 0  | 0  |
| 4a9930d7a57f58fc12c6f7e5a7d13ddc | 0  | 0  | 0  | 0  |
| 0d9563aa04872a019fb3eee25558ca47 | 0  | 0  | 0  | 0  |
| b8a95d91cfd5b516b56110dfc185232b | 0  | 0  | 0  | 0  |
| f6b60eb98f97a9172c65838706269c2a | 0  | 21 | 0  | 17 |
| be2d8c312de4161e0bfec993de840235 | 0  | 38 | 0  | 0  |
| 8022f9698a97611111b603f056678a9b | 0  | 5  | 0  | 33 |
| 14c59033344507a0e5f8d9601d216932 | 0  | 9  | 29 | 0  |
| b3b8fece93cb2029d4669013ada23518 | 0  | 0  | 0  | 38 |
| 57186eed93a7b9af1e9ab84711dd3143 | 0  | 0  | 15 | 23 |
| fad36ba9fa8d25c4115f5027fa0e8c4e | 0  | 0  | 0  | 38 |
| d8b71cbf3631ba702bd31067145ea12c | 0  | 0  | 0  | 38 |
| 0c99fe9fbac5362700d32a4880230de0 | 0  | 0  | 0  | 38 |
| f06c5dae1147bdf9778337da587edbe5 | 0  | 0  | 0  | 38 |
| 9acafe25b26c18b1237222818180b0a1 | 0  | 0  | 0  | 38 |
| e9ac8ea519bcf5734c4528d77be4af86 | 0  | 0  | 0  | 38 |
| 61bcb4b596bd651d708f06a09346448a | 0  | 0  | 0  | 38 |
| 13ab08e0a1ca9a9c2fdbf7a3fad1acd2 | 0  | 0  | 0  | 38 |



|                                   |    |    |    |    |
|-----------------------------------|----|----|----|----|
| 37ccff5a111c72c70a557dc798f26a8c  | 0  | 0  | 0  | 38 |
| 3f3ab3c9a880f09c036ee4f01dc81bfb  | 0  | 0  | 0  | 38 |
| 157a4907d75e6733e26d629f38e34a6f  | 0  | 0  | 0  | 38 |
| b7c61475f5000058d8136a8830398975  | 0  | 0  | 22 | 16 |
| c6164c9e27354b9b350aaa312ed64df7  | 0  | 0  | 0  | 38 |
| 4632556a795f47ec08a3924cacc45444  | 0  | 0  | 0  | 38 |
| 1bdbb2b8c9fa81abf16ff7cae2612fac  | 0  | 0  | 0  | 38 |
| 24b87afd5e11106f8d877c2f153bd4ba  | 0  | 0  | 11 | 27 |
| 639f502c013178e98fe4d1bb25fde3d2  | 0  | 0  | 0  | 38 |
| 2a1b49e55d874c74ee1bf1dde3d4afa5  | 0  | 0  | 38 | 0  |
| 57f6d898664bfde475d1d12eaa20f96b  | 0  | 0  | 38 | 0  |
| 8f82a0fcaa3df5ed7c6b721e969e3037  | 0  | 0  | 38 | 0  |
| c8cc2df0afe569a69ba47dbcf22c9deb  | 3  | 0  | 34 | 0  |
| 0f23a8c612150c7145b5b7078a1e9d3e  | 14 | 10 | 13 | 0  |
| 9ce716a5247826c8d9328956661ef9ae  | 21 | 0  | 2  | 7  |
| 91ec1e77f3031a0fc4d7ec53d79f4f84  | 14 | 5  | 0  | 12 |
| 1877acef2a8e01336520e9b44e198f31  | 37 | 0  | 0  | 0  |
| de39af1ab6bd774241f46514585e2bfff | 12 | 15 | 0  | 0  |
| d44d94c1b7da2b8ca6736b981cb00c47  | 10 | 0  | 0  | 20 |
| adeaa37cc65d2c94bb44598b0dd0eaf3  | 0  | 0  | 0  | 0  |
| 726a6e63063f455da31da8fd871fe5fe  | 0  | 0  | 6  | 0  |
| ca614d20bd1635ffbb94ec8745358732  | 0  | 15 | 10 | 0  |
| a7fe94b279f7c3ba8c4b71ce1503dac1  | 0  | 0  | 0  | 0  |
| 9a17d518bc8e244d37d5c59d8825ee07  | 0  | 0  | 0  | 17 |
| e612980b10b32b10fb42e364059a17a1  | 0  | 0  | 0  | 0  |
| 6748770dd830a47ce941f1ee404144a7  | 0  | 0  | 31 | 0  |
| 4011faf5824280d084e2a668f3216c5c  | 0  | 0  | 27 | 4  |
| c18fc2fe90ef52dc2596b7cdb4a04cb5  | 0  | 0  | 0  | 0  |
| 3f63845a54eb550b8df349fc201c4a35  | 0  | 0  | 19 | 0  |
| 8706860e793cad05804b96afdb93f3ee  | 0  | 0  | 29 | 0  |
| 13d3d85d79d71b4dd514e3b2f5b190ea  | 0  | 7  | 0  | 30 |
| 2cae72f671516f6ae82b8d4ef5fe8fd1  | 0  | 37 | 0  | 0  |
| 762f1df9bbad8e4f44c104f5ba92fd6b  | 0  | 37 | 0  | 0  |
| 81a6cddef62f2972eeacc17d102789fd  | 0  | 37 | 0  | 0  |
| 5328b31146e783edebb0771d4ca20a77  | 0  | 0  | 0  | 37 |
| c157f1978fbfefb65be9b2463326daa0  | 0  | 0  | 13 | 24 |
| 70387516b241b0e8580584bd3a0a448d  | 0  | 0  | 25 | 12 |
| 70dff230ef6f80adcc7bbfac3e79248d  | 0  | 0  | 0  | 37 |
| 0bcac542799420fa7e0cf541e1036a93  | 0  | 0  | 0  | 37 |
| e4b1f5bb651dd7a3eca4cfedd1018844  | 0  | 0  | 0  | 37 |
| 9d604f5658be1b3d588b3691a6f116ea  | 0  | 0  | 0  | 37 |
| 5f387c21ab56869b794f48ead848dbf4  | 0  | 0  | 0  | 37 |
| 4b354a40c136a1fd8d9436b4123fc7b5  | 0  | 0  | 0  | 37 |
| 19ee5621e6112d9d279508bf1ff4525d  | 0  | 0  | 37 | 0  |

|                                  |    |    |    |    |
|----------------------------------|----|----|----|----|
| 8cbc03fa8fb27233e41036389c18ad1f | 0  | 0  | 37 | 0  |
| 9a5d978b937b6eaff4ceebcea14ccaa3 | 0  | 0  | 37 | 0  |
| 636757c2de23e8c082bbf91b445d8644 | 0  | 0  | 37 | 0  |
| e76dd83cfc1e3659d91b0a656678f53c | 0  | 0  | 37 | 0  |
| 8218b5a9a40a6e9e70cdb686e0ac9a3f | 36 | 0  | 0  | 0  |
| 5fa8f83e36628d2584d2c4b72159530c | 16 | 0  | 0  | 0  |
| 730f55c49315ee06abbc8e1811e4e0a8 | 15 | 21 | 0  | 0  |
| 27614ce70e9dbd975a95693372c5e729 | 13 | 0  | 0  | 6  |
| 3a8889ea85cf16fc7778d338fd9a5fe4 | 11 | 17 | 8  | 0  |
| 417b70c00e1658b12c543bdd7bf3bf22 | 27 | 0  | 9  | 0  |
| dee5b86df8458b796b98c7befcce8a54 | 15 | 0  | 15 | 0  |
| 1f50d0af59e886726c721e6303cc6bf6 | 27 | 9  | 0  | 0  |
| d95534c9c56ef92473e80f872ce9dfd1 | 19 | 0  | 17 | 0  |
| fb7eea4e87e6c63cd83d4963f392891b | 25 | 0  | 0  | 8  |
| 44cf045d237c42310f80761635fa4d4d | 16 | 20 | 0  | 0  |
| a1d418955a83baa57bea16c7a88d7707 | 15 | 10 | 0  | 11 |
| f27d28f674ceb3697cf906a48b6b971e | 36 | 0  | 0  | 0  |
| 6be6c6a57f2c0639ff60eae49f3b3bf6 | 36 | 0  | 0  | 0  |
| 34dlf4d10af06a1d9557ba14fc1fed09 | 0  | 0  | 0  | 0  |
| 422005452d5430bc3681267effc8eec8 | 0  | 0  | 20 | 0  |
| 96f64b6abe313a652236c89fb0b8eb5d | 0  | 0  | 0  | 0  |
| f00d124e7233c2896ebc221738703c53 | 0  | 0  | 0  | 0  |
| 212b4bae91807362c57e48c32a436075 | 0  | 13 | 0  | 10 |
| d5cdc9102d6cef21519c0701560f4630 | 0  | 24 | 0  | 6  |
| 9328cc0eb2651b7bcff3bc782cb96fb2 | 0  | 0  | 0  | 0  |
| 7a0817d01b0b7052d46dd1a203512fbe | 0  | 0  | 0  | 0  |
| ad5645f738ca160efe3b1db6c705b85e | 0  | 0  | 0  | 0  |
| a8455e702b0a67626325500ddf22f704 | 0  | 0  | 0  | 0  |
| 380033aa0c16cb6e611564edc9f1466e | 0  | 29 | 0  | 0  |
| dff38e05470586b6a22b18b5e5c6feae | 0  | 0  | 0  | 0  |
| d5f8d9e80ab230d082a1808e025a5309 | 0  | 36 | 0  | 0  |
| 6619423a956b83519a214d3fe784a6eb | 0  | 20 | 0  | 16 |
| a4e6081e26b0d3976cea3089433b6042 | 0  | 36 | 0  | 0  |
| 5f502f09a7f525a391f17970c732c730 | 0  | 0  | 0  | 36 |
| 9e64f7caef0c9a8e0c5f9fd3c152260f | 0  | 0  | 0  | 36 |
| 13b62114915601de8b443b7580f4fdd4 | 0  | 0  | 0  | 36 |
| e6cff4e9df393ea385f75d382ed4255e | 0  | 0  | 0  | 36 |
| 08da2f607cddb9c2e9a5edbcdf0c5ff7 | 0  | 0  | 0  | 36 |
| fef5be7cc20496ddf74ab7962bbf97e6 | 0  | 0  | 11 | 25 |
| 656407a13908c0fad846298a4d120f05 | 0  | 0  | 0  | 36 |
| ac02f737aaa19bfc653204b501039e1b | 0  | 0  | 0  | 36 |
| c7a3550a76e60de49b183e4951552ff5 | 0  | 0  | 0  | 36 |
| e494bc73b12493748fe875feabf78f86 | 0  | 0  | 0  | 36 |
| 5941e5309ff76a903b2dc9134c84c39a | 0  | 0  | 36 | 0  |

|                                  |    |    |    |    |
|----------------------------------|----|----|----|----|
| 2a4eefbd2c18d99064e8c686c207a0fa | 0  | 0  | 36 | 0  |
| 3813a306060d3f80064e0727fc58f924 | 0  | 0  | 36 | 0  |
| 855bc704d2d14d4fa616e1c2673615c8 | 0  | 0  | 36 | 0  |
| 34b01fd177354ad1fe1bfcf1a81d913c | 0  | 0  | 36 | 0  |
| 6b4f8e4e6ac8864a2033cc4800e49920 | 0  | 0  | 36 | 0  |
| 79c586935f03b3b9415aa245d202f216 | 0  | 0  | 36 | 0  |
| 984f1a2f7f6b8d644a88880184365c2d | 0  | 0  | 36 | 0  |
| c01ac7f55af135532d0dd320b033406a | 25 | 5  | 5  | 0  |
| ce018c3d44fcca8298a3d32376af0c36 | 12 | 0  | 17 | 6  |
| 4331247fe46fd7a64d12c4adea778a6e | 35 | 0  | 0  | 0  |
| cec809e18f87a5037be96cb80124d4fc | 24 | 0  | 0  | 0  |
| b7701af09b5e3c3bd3ad60eacb1568f8 | 35 | 0  | 0  | 0  |
| 5953faa417053f2d71a40c264144b1bc | 21 | 0  | 3  | 0  |
| 74b6f775c687ee9560c138232edd54e8 | 35 | 0  | 0  | 0  |
| cf40b90ab3927e99e76a901d39e11d44 | 10 | 0  | 0  | 0  |
| ad0140e97b44feba274a4dc4ac374781 | 19 | 10 | 6  | 0  |
| a55c957b5532c47dfce9018010bd08f1 | 35 | 0  | 0  | 0  |
| c77d89da2e21fc0a26e9a807e6cda7b1 | 21 | 14 | 0  | 0  |
| 4a4a406c92e0ded1a8642239fa356e11 | 9  | 26 | 0  | 0  |
| f12a2844f0dcdc2ef5535842e0d76287 | 0  | 15 | 0  | 0  |
| 104000fe67718348bb265fa4e5429c62 | 0  | 25 | 0  | 0  |
| 3af56318734fe865d849782d75ecdd23 | 0  | 0  | 0  | 0  |
| cb7e1a7d5c315037b38614635447f2ad | 0  | 0  | 0  | 0  |
| 8a282bb9899f95aa06db30d96f9996c2 | 0  | 0  | 0  | 0  |
| 4953c31cba2bf66b71ddeabfc02e4128 | 0  | 0  | 0  | 3  |
| 40c0b4bfc33c37e0d7fb0c6628c62bf4 | 0  | 0  | 19 | 0  |
| 526a0ba28009ebefc899bdeda431d2a3 | 0  | 0  | 0  | 0  |
| 6f9dad676b3aea4c3c131aca55df043b | 0  | 0  | 0  | 0  |
| 7ec31184c4ffe24486ac74af83ed07e5 | 0  | 0  | 0  | 0  |
| f1c6c774d9b353f7fb4a3fa35a00fdea | 0  | 0  | 25 | 0  |
| ef16fcc0a0a0c9630f868985ca0fd330 | 0  | 11 | 17 | 7  |
| e3c12193200b041d882d21f6b97a925d | 0  | 35 | 0  | 0  |
| 73e6a770576611e4eec7163b6edaf47f | 0  | 20 | 15 | 0  |
| 5560bd9b9cd8f4cc16111eb9d74f6336 | 0  | 11 | 24 | 0  |
| 69badd1919f075d9adce6e41afd752cc | 0  | 5  | 0  | 30 |
| 70fe9535457813ed872db3029e9fb11e | 0  | 35 | 0  | 0  |
| 3a81a7190ed8301292289a32ffcbff88 | 0  | 35 | 0  | 0  |
| bea03138c6c32a69c9f14e4c27efb9cc | 0  | 13 | 0  | 22 |
| 6f36e2957b5856cb1fc8ce8d2a41e3ca | 0  | 25 | 0  | 10 |
| ca956e806a5302ae4002d4827d203da2 | 0  | 19 | 0  | 16 |
| 19e59dd93fcc8ba16b807fd3a37742f8 | 0  | 0  | 0  | 35 |
| 2f3c19db9c2a8a773dce62ee48da6e10 | 0  | 0  | 0  | 35 |
| ab1cb266046b57503d498c49119a3927 | 0  | 0  | 0  | 35 |
| 957c96b067aaa6e214658f5a5163209a | 0  | 0  | 0  | 35 |

|                                   |    |    |    |    |
|-----------------------------------|----|----|----|----|
| 147898129699b65f973d05d9c66e37c9  | 0  | 0  | 10 | 25 |
| 0bc0db93cf416a224fa3adfeb8fbc780  | 0  | 0  | 0  | 35 |
| 928825432aa17c647dd663f110be8b77  | 0  | 0  | 0  | 35 |
| eb4d56261af97a69a4a5ed6b226d5606  | 0  | 0  | 0  | 35 |
| 905626bb5c5392d3d185ef1c72379baa  | 0  | 0  | 23 | 12 |
| 88ba22e9efdf7c7eb22040976b9e6402  | 0  | 0  | 0  | 35 |
| fdc7698f762f019df15a73e882891d5e  | 0  | 0  | 0  | 35 |
| a067c97236f5860bf9fd3d68584a1819  | 0  | 0  | 13 | 22 |
| 123abbbf9680ce433a1a61a85f087abaa | 0  | 0  | 35 | 0  |
| 2ffaa71d31e4a0adf09e5e7c85cabf59  | 0  | 0  | 35 | 0  |
| 5dd3943598640d611d8d150cc629fc50  | 0  | 0  | 35 | 0  |
| 1869260d1415879ca909fede1d277f71  | 34 | 0  | 0  | 0  |
| 4ef83859cb0e75dcd61e83eda5c8ff25  | 34 | 0  | 0  | 0  |
| 111971e6cf78b30f0f9412a200e793bd  | 6  | 0  | 0  | 28 |
| 99a1d2cfa4d32c6aa42796f7005ee6b3  | 17 | 0  | 17 | 0  |
| 602c548e8066ee8083b6a15b281d8030  | 6  | 10 | 0  | 18 |
| cafb36b084c58d12a8f7089be24eabc6  | 3  | 4  | 8  | 14 |
| d509fd6a2a720b82f9b4451fa7364dfa  | 34 | 0  | 0  | 0  |
| 9739812c8c50ef63895d063c5efbfff99 | 31 | 3  | 0  | 0  |
| c7a7edd1dfbe300760e415faa238782f  | 0  | 14 | 0  | 0  |
| 95c125c06c663bf3ce6168c84ae68cb8  | 0  | 0  | 0  | 0  |
| d217ee1eff688885615e52ec71e1ab39  | 0  | 0  | 0  | 0  |
| c6c0681de437d7e3c55cee211636cfde  | 0  | 0  | 0  | 0  |
| 2607e938ac9fc862e169b71c8655699c  | 0  | 0  | 0  | 0  |
| 4c71bfc929f567f35058175fbc7a78d5  | 0  | 0  | 0  | 0  |
| b5dce63bf42b13865003b0f47096811c  | 0  | 0  | 0  | 0  |
| ced606bacee4c0edacd509cd3c5f3ca7  | 0  | 0  | 0  | 0  |
| 71fd22c6f6a6fbd870032172a473dbac  | 0  | 0  | 0  | 0  |
| c299cb3c1cd698727bd1d8afd48efea5  | 0  | 30 | 0  | 0  |
| 9d063c64a2eee2f89925f68e2fc3f453  | 0  | 0  | 31 | 0  |
| 96900980db5f9840bdbba2e41d103d84  | 0  | 0  | 3  | 0  |
| c9aba5ec54f032d6df414f16dc08a35b  | 0  | 10 | 0  | 24 |
| 0a684ec49ace4b9dd335b16178e089ed  | 0  | 19 | 5  | 10 |
| 724a2553e7dd3db6617402b53c9877dd  | 0  | 34 | 0  | 0  |
| 1623acd0b9909792f2891b2987ed1acf  | 0  | 34 | 0  | 0  |
| 25be691b7e336ea3b66a5c3fd0b78c6f  | 0  | 14 | 0  | 20 |
| e66cbf16dde0576dd6d834b027921a40  | 0  | 34 | 0  | 0  |
| 362613301e67a9e3681194d22ef4bccb  | 0  | 0  | 0  | 34 |
| 2083f283e8c6c15155bec731b63052f0  | 0  | 0  | 0  | 34 |
| 7b0782ee509d8bfd443e5246dd20d328  | 0  | 0  | 0  | 34 |
| 0cfafadd45e71d7d71d9b0f36e10e894  | 0  | 0  | 0  | 34 |
| f5b52b99e9a2048e8fd05a2669356546  | 0  | 0  | 0  | 34 |
| 6094c7eecf92d8685449a2e278e3a6c4  | 0  | 0  | 11 | 23 |
| c924114e24a20b3ccc382880a00da0d5  | 0  | 0  | 0  | 34 |

|                                   |    |    |    |    |
|-----------------------------------|----|----|----|----|
| 81e26db6dd926846ee06e9a14ca9875e  | 0  | 0  | 31 | 3  |
| 664e8cfe10825f9ab2f3d2ac3889d14a  | 0  | 0  | 34 | 0  |
| 3cd4758d1e74e0ef2a57df3883f6b565  | 0  | 0  | 34 | 0  |
| df2f0b2799aea3a281b29653c214782e  | 0  | 0  | 34 | 0  |
| 8176432c958dc83175a07208c0cb8d67  | 0  | 0  | 34 | 0  |
| ab6da5d49e5f7211e7d683c2acd6f129  | 0  | 0  | 34 | 0  |
| f18903d0e24b68c0b210cd9440cf2def  | 33 | 0  | 0  | 0  |
| c16a792aac086ffaef7e13511ee11f8a  | 33 | 0  | 0  | 0  |
| fa0d3f2964026a3717c528e800d6bdd3  | 22 | 0  | 11 | 0  |
| b3f0feb291f49f5a89feceae93744953  | 33 | 0  | 0  | 0  |
| f426d907f0ca94376bceaf9f28e1f079  | 14 | 0  | 16 | 0  |
| 19295e23b603a986c8dc8c335f95cd89  | 15 | 18 | 0  | 0  |
| b76336362bf74a751a32b541368b64bd  | 33 | 0  | 0  | 0  |
| 69e0da171317602606d4c306074dc741  | 33 | 0  | 0  | 0  |
| 633cfd826d91e11ca17e687d4178f69d  | 7  | 16 | 0  | 0  |
| 02654fa0e47aaa51eb19bc0759d54a0d  | 14 | 8  | 6  | 5  |
| 71726293e7c352a22a076f7ae6980862  | 22 | 0  | 5  | 0  |
| 663c2cb569fa7d4fccdb4f2b19d9fb63  | 33 | 0  | 0  | 0  |
| 66f358043769a387fd3d1f045499f3a8  | 17 | 16 | 0  | 0  |
| d658aad40265adfbbbed1e387f6129912 | 19 | 14 | 0  | 0  |
| b6b435a23d9c04dfc767d540533ec2a0  | 5  | 28 | 0  | 0  |
| 7146913b8f30969dd3b9989b0b39996a  | 8  | 25 | 0  | 0  |
| d0b590fc10524746b75ff5793d1a3f13  | 9  | 0  | 24 | 0  |
| 4e61b05711aa4df6f00648a24b3eb4f0  | 7  | 26 | 0  | 0  |
| 2abcc6ba5e5a0a26251af36a2b61841c  | 0  | 0  | 0  | 0  |
| 36591fde5db700116811fd69144b33df  | 0  | 0  | 0  | 0  |
| 90372d530038af420a820c5dc44be23a  | 0  | 12 | 0  | 0  |
| e96661e518fff487325a2466ff980507  | 0  | 0  | 0  | 0  |
| 9251069c4e1647f39a2b8f9f7dc61045  | 0  | 0  | 0  | 0  |
| 6a3a370a62016f2c948ab18524942f31  | 0  | 0  | 0  | 0  |
| 3ae77b39a35c42c7b5c6b5cf02135745  | 0  | 0  | 0  | 0  |
| cdb605e16c587484d117f691aecc1f5e  | 0  | 0  | 0  | 0  |
| fccb48f3a6a7b8f98be3cb1c0094ee79  | 0  | 0  | 0  | 0  |
| a2c1815ae24cdd0bd3657670a17d3599  | 0  | 0  | 0  | 0  |
| d2a7664479d04077c780c998b4a3bcab  | 0  | 0  | 0  | 21 |
| 5fd115117b64248b06cecbba88b948e0  | 0  | 33 | 0  | 0  |
| 77785714572cd29a0d511727c1683c47  | 0  | 33 | 0  | 0  |
| e44aa1b52c7ce6e80e83278dda22a382  | 0  | 33 | 0  | 0  |
| 507380621ed93e541f3ab1b30415ba29  | 0  | 21 | 0  | 12 |
| 7492ca39251d18c34f71fa1385f9e5e3  | 0  | 33 | 0  | 0  |
| 741addad0aaea95e7b15c58b6eb512d3  | 0  | 8  | 0  | 25 |
| a14c79240992357dd46fabbc3e8a69fb  | 0  | 33 | 0  | 0  |
| 0bb1452fff40729260b1023eba269559  | 0  | 33 | 0  | 0  |
| 37511c01def009dd9d6ee05a826f2961  | 0  | 0  | 13 | 20 |

|                                   |    |    |    |    |
|-----------------------------------|----|----|----|----|
| c41a8375861d4b2ae4f6fbd57738ae6a  | 0  | 0  | 18 | 15 |
| fa6b0f13b685b1380846cccd6be383e3  | 0  | 0  | 0  | 33 |
| 24f997daf5a938e8ff7e1a55aa3204aa  | 0  | 0  | 0  | 33 |
| a0f42f597da9f53e5bece0e3d631d1f2  | 0  | 0  | 0  | 33 |
| 28b341a2b1b5dc0e3ede96e4eb17409e  | 0  | 0  | 0  | 33 |
| 8923f8a64a3c0687976eabd1b6e9f656  | 0  | 0  | 0  | 33 |
| 6f4caca0c47b1f4d0035835afbc2a800  | 0  | 0  | 0  | 33 |
| a66d2f5c1ac4ac41a38f57c4c6e904b5  | 0  | 0  | 5  | 28 |
| f4bf77f49898b8e295c3abcf4c8a00e2  | 0  | 0  | 0  | 33 |
| 7869217e6db7246296a26839ddf7e815  | 0  | 0  | 8  | 25 |
| 7f7332bd2105feb3acb7b326fc69a852  | 0  | 0  | 0  | 33 |
| 116c1bfeff788a23cb6f4dc0dfc8fe6bd | 0  | 0  | 0  | 33 |
| 210316fcaa1ae856329e5c1718ab519d  | 0  | 0  | 33 | 0  |
| 92be9a6bb9b44578ac30fa881ef4b3bd  | 0  | 0  | 33 | 0  |
| 0ee2d08afb502af42f25a2ca6e0bfe40  | 0  | 0  | 33 | 0  |
| 99c602a7d5704e70529c070f5086dfb0  | 0  | 0  | 33 | 0  |
| 7a7c977e35ae7d18e0831ada325f94be  | 0  | 0  | 33 | 0  |
| dbaf1ebb21ac519f8185aaf4c8b846ce  | 0  | 0  | 33 | 0  |
| 228238a8af4c54fbbc2f59ce63f940d7  | 0  | 0  | 33 | 0  |
| 3fdc127f2073545cd3a4897573d40aa8  | 32 | 0  | 0  | 0  |
| 371735f9a8092b8e756430b3a86e1192  | 25 | 0  | 0  | 0  |
| eef57a10e28f220832bdd9bf19ca3ff5  | 13 | 3  | 0  | 0  |
| 7bf92750089635eb46c07ff635c29ffe  | 32 | 0  | 0  | 0  |
| 41e8c98128ea89a3eccad9492d40c98d  | 32 | 0  | 0  | 0  |
| 4d71b83dfc4dd93c14f7d12391abfc0d  | 13 | 19 | 0  | 0  |
| 22fe0db8dd9bdfa08dfbe258c30bc537  | 2  | 9  | 0  | 6  |
| 3b44c077fb977484bd52e916bfec70c5  | 24 | 0  | 8  | 0  |
| 1d6b47c9b2643dd75ceb92cc17656ee6  | 6  | 8  | 0  | 8  |
| f44cfb862223265a48369aae64d238c2  | 9  | 5  | 0  | 18 |
| 7ec46a82ec410e9ad27e7373327fdb9a  | 7  | 25 | 0  | 0  |
| 23f780c757db55f89c084addb0950541  | 19 | 13 | 0  | 0  |
| 59050786de5a225eebdeb805a3d7384c  | 3  | 2  | 10 | 7  |
| 56cf537e7260c033a99d564bec828f71  | 14 | 0  | 11 | 7  |
| 063bb8641c35d4f28900874d850e4300  | 6  | 22 | 0  | 0  |
| ffd2852fed1bd52883cb74c91ecd9a0b  | 32 | 0  | 0  | 0  |
| 9ac701c4435f561f2d540631187d37d9  | 2  | 10 | 0  | 20 |
| d9e756043db3272451769a92efb46406  | 0  | 0  | 0  | 0  |
| b0cbdc86091883d5d1575dbd2589a274  | 0  | 0  | 0  | 0  |
| 831b5d50e615dfb5b1d1391c9031b2b1  | 0  | 4  | 0  | 0  |
| 7b4f8490d33d4126e8bf73fdfd4d384e  | 0  | 0  | 0  | 0  |
| 22da92cbc1142b2d1be42f8a6d8922f4  | 0  | 0  | 0  | 0  |
| 9c4eb814e22992234c36973ef094913e  | 0  | 0  | 0  | 0  |
| b2a81586ecca4b77ff930cef6d492048  | 0  | 0  | 0  | 0  |
| 4cbaeb47764a25606744920ca6344921  | 0  | 0  | 0  | 29 |

|                                  |    |    |    |    |
|----------------------------------|----|----|----|----|
| 6e45cad8db0e07894de4ca0cbc49ae1c | 0  | 5  | 0  | 0  |
| c24b93323d26e8c01d3a11e94dd5a4a5 | 0  | 0  | 24 | 0  |
| 6d9438228d06570597f24a18ce22e8d4 | 0  | 0  | 0  | 0  |
| 24b243876c5994a0ed9edcecf2472ec3 | 0  | 0  | 0  | 21 |
| 5c363a0a43edd40ac5cc22fb1c775ec9 | 0  | 0  | 0  | 0  |
| 95ba96244a0d9440690b81f25a0dd0ee | 0  | 32 | 0  | 0  |
| c1ec7b4c3794e5ae8362b8f18102cb87 | 0  | 32 | 0  | 0  |
| c7eb63123fb27f000669d84f41ef7050 | 0  | 32 | 0  | 0  |
| 07d3cb073db4b742e07c40be0bdcfc39 | 0  | 32 | 0  | 0  |
| 9251c1541255c90ba190cdbb5c810803 | 0  | 32 | 0  | 0  |
| fefdc38f7f4210786e444cef301af059 | 0  | 32 | 0  | 0  |
| 0ca27a3739402c0c9aa9454827a7fd4a | 0  | 32 | 0  | 0  |
| 7cd84d88958900427ed2be4d7efb1510 | 0  | 32 | 0  | 0  |
| 0bee32f550683ce491c17c404ee9f78b | 0  | 32 | 0  | 0  |
| c5df395553f61914f1817b94747ae034 | 0  | 0  | 16 | 16 |
| c61503725b27070c8232515815c47068 | 0  | 0  | 0  | 32 |
| daf119eaa8f6d6c60590d124594dccb4 | 0  | 0  | 0  | 32 |
| 6bd24d87138eba2bad5caecc5fd1c960 | 0  | 0  | 0  | 32 |
| 410973895437b9a16f53c3aade301af1 | 0  | 0  | 15 | 17 |
| fd20c92d6a29eb48971a513f8610f2cd | 0  | 0  | 0  | 32 |
| 73ddb1ac5db6937271da7b631cb1d4a  | 0  | 0  | 32 | 0  |
| d57303fa4251e31007584c9895634d9d | 0  | 0  | 32 | 0  |
| 1d79f69431be0fb216524b8ca9d015f3 | 0  | 0  | 32 | 0  |
| 465b5ad7aa047a7bb050d56818a5efa5 | 0  | 0  | 32 | 0  |
| 1fbcad403eceb26e6c3d5a838bf1803  | 0  | 0  | 32 | 0  |
| 4b8598b031e01b18cdfd405ba24b4321 | 22 | 9  | 0  | 0  |
| d7c1647ebed5c19a2fe17b4b82da15b6 | 5  | 0  | 26 | 0  |
| 1d566e26d00660764f53a977f80af28e | 26 | 0  | 0  | 3  |
| 724051434deb0781cb63ddc724c33b13 | 10 | 5  | 8  | 4  |
| 954c24e87eec89077efb7dbc63ad9019 | 4  | 3  | 6  | 0  |
| 1b002895beb537ad3e3cf41fe794f05b | 8  | 4  | 3  | 3  |
| 035304c99ec40ba792b0b876fadd7ca  | 20 | 7  | 4  | 0  |
| 064b1b6e199ca0b9809d55ca586ff98f | 23 | 8  | 0  | 0  |
| c3e2ba02a8cbe6fa42c9c9fd485f98cb | 11 | 20 | 0  | 0  |
| 5873f205251f5cff3138ba88954ec492 | 31 | 0  | 0  | 0  |
| 97a343c673df4a3d0afc2f837a2d8a92 | 5  | 6  | 0  | 0  |
| 4c36bc441412e190ec7663e0074bca5c | 0  | 6  | 3  | 5  |
| a3826ac8c3dbde2865da4706cedc4417 | 0  | 0  | 0  | 19 |
| 7219c101408188477f5904628c16803b | 0  | 4  | 18 | 0  |
| 9d25aa0202a5491319e80cc8d477ffec | 0  | 0  | 0  | 0  |
| e0aadce86f2203ed16ad54203521333d | 0  | 0  | 0  | 23 |
| eccd40eae9860eb52c8a95f1153c3a72 | 0  | 0  | 0  | 0  |
| 90e821f7511b3a4a572e74a41f93c1a7 | 0  | 0  | 0  | 0  |
| e5c70135aaf96fbfd3634633f173d378 | 0  | 0  | 12 | 15 |

|                                   |    |    |    |    |
|-----------------------------------|----|----|----|----|
| 4adac39ac1282a1290828d72603be8bb  | 0  | 0  | 10 | 0  |
| 4bcba5b93cec617642bf7b5f828c2cdc  | 0  | 19 | 5  | 0  |
| 2f6089c95740e605ce6fe90cd7a5a5db  | 0  | 31 | 0  | 0  |
| 8c28a15f9cb185d32d5ed9df2957ab46  | 0  | 5  | 0  | 26 |
| f15ad53b8823cc9d22de21a0553ef7e9  | 0  | 17 | 0  | 14 |
| b706afd908448777f561c1ab087cb121  | 0  | 31 | 0  | 0  |
| 056953b076e70dca08b0f5ea7638b7e2  | 0  | 11 | 0  | 20 |
| f795335524494f3485c0e008fe7d80bb  | 0  | 31 | 0  | 0  |
| bde9eb85fbccb15e6e198b983de084c3  | 0  | 24 | 0  | 7  |
| 00822d0cc8d8ca9625995476b7ec00fe  | 0  | 0  | 10 | 21 |
| d797a2a05906b737fa767e1c62edd24f  | 0  | 0  | 0  | 31 |
| bdd1c17a66b150d2445bc1c5e127862e  | 0  | 0  | 3  | 28 |
| 97a39c58e95384f1794b378b180aba17  | 0  | 0  | 17 | 14 |
| 3a33d53319f9f5bbf672959ed74374f9  | 0  | 0  | 0  | 31 |
| ceca5197234a306ed1987ac5db2cdf96  | 0  | 0  | 0  | 31 |
| 44ea4fb146d35d22fc27ac13bc353683  | 0  | 0  | 31 | 0  |
| 5694da5b4aa8b7b00a520efe0bfb8ded  | 0  | 0  | 31 | 0  |
| 117e8bac256ce299228f94930bdbd79c  | 0  | 0  | 31 | 0  |
| 13b8559dae88d7d67c20777dafa877db  | 0  | 0  | 31 | 0  |
| 15b5a16c66bfff3bc0289a55599591933 | 0  | 0  | 31 | 0  |
| fbadec677735af4925d9071e2bbfb6b5  | 0  | 0  | 31 | 0  |
| 31522d08a69261dc12f7da56e258f1af  | 0  | 0  | 31 | 0  |
| d248d1c83d68930a71105419d0c50a6c  | 0  | 0  | 31 | 0  |
| 51e8a3a2c7191e418d281bdc4b5a0ecc  | 30 | 0  | 0  | 0  |
| 324524ce5f17a75870dd74cdd674d58f  | 30 | 0  | 0  | 0  |
| d7ba3119be4d1f8d8f25606f737a79dd  | 30 | 0  | 0  | 0  |
| c5e754f13064c9ebab2e872f8fee8fc5  | 27 | 0  | 0  | 0  |
| cf08654cea89a4fb08f391edd49ae379  | 8  | 0  | 13 | 9  |
| 0ecccf6af315b1f46e3b8b3c82dae163  | 30 | 0  | 0  | 0  |
| e5fdf13ff3e5b09a0adce0a105a0640f  | 6  | 13 | 0  | 8  |
| 431a60eccda3df1dc7498882cca842e   | 9  | 21 | 0  | 0  |
| 1491622cf10c53a3d2b120abd3ae7c0a  | 0  | 3  | 12 | 0  |
| aa341f8271a7410ee10b869cc5abe925  | 0  | 0  | 0  | 0  |
| d36882b3b7de1df9bdf70e75e58eb57a  | 0  | 0  | 0  | 0  |
| bd5c528fe873f52e01d22cadd3844261  | 0  | 0  | 7  | 0  |
| 1d837e0f0b6508cbf87aded8522e2362  | 0  | 23 | 0  | 0  |
| 63e63913e022cebaa998b6db8d7c7830  | 0  | 0  | 4  | 0  |
| 9ad733e2bb8e075b098ffe798dc660b8  | 0  | 0  | 0  | 0  |
| dd6fa300d9007145cd61e3835c4978b6  | 0  | 0  | 0  | 0  |
| 53e205264d77828836a0986ac1711611  | 0  | 0  | 25 | 0  |
| e0b10c1867b09208cc7920d5323edf4b  | 0  | 0  | 6  | 8  |
| bf8514778ee8795c5d273aa2a98a5a99  | 0  | 0  | 0  | 0  |
| fa9990a81f39b122e555aa7b27251d1f  | 0  | 0  | 0  | 16 |
| 03fc43acb28a9671bb156a0169146a74  | 0  | 0  | 0  | 12 |



|                                  |    |    |    |    |
|----------------------------------|----|----|----|----|
| 0be80be47432570c99418366c4c57205 | 0  | 0  | 0  | 18 |
| 4c5e8f8508d78a58ff26bc6b446d8058 | 0  | 9  | 9  | 5  |
| ca180b3576c681f6ba93c250e176a3f2 | 0  | 30 | 0  | 0  |
| a09472c3c61b6f058265b1b98d41a4c9 | 0  | 30 | 0  | 0  |
| 627a0af08debe21de3964f5be4a2b8c8 | 0  | 30 | 0  | 0  |
| c307d3cd7747ad03737f523b5ede8d90 | 0  | 12 | 7  | 11 |
| e1b9c2fb342daf07f46f0a94632cd866 | 0  | 30 | 0  | 0  |
| 14c847bd814b90b1303bdabec2c5d0b3 | 0  | 16 | 14 | 0  |
| 713f97c75905b3f0714b549c85bee860 | 0  | 0  | 0  | 30 |
| a98e0e0c4024ad825b90b6584802e3fd | 0  | 0  | 15 | 15 |
| b712b572e1ef558155205ab83160b040 | 0  | 0  | 0  | 30 |
| 59f687fd26d156f067873d08f4654df9 | 0  | 0  | 0  | 30 |
| 8c66b4358ff31c9ff13dbfac26fb7222 | 0  | 0  | 0  | 30 |
| 00a6f4987c51067a4fe012b09cbab08c | 0  | 0  | 0  | 30 |
| 999f199073c7cf73c9cf90b8acce9a09 | 0  | 0  | 0  | 30 |
| d2696b5f3a5e98bac8a79dfcaf6a1b62 | 0  | 0  | 0  | 30 |
| f76d2b47755ec96c88e8789bce895d63 | 0  | 0  | 0  | 30 |
| 8870f5e02f7a8021dd70959b40880fb7 | 0  | 0  | 0  | 30 |
| 46fcba156bd2354be7c91dbd5a750e53 | 0  | 0  | 17 | 13 |
| d962633b98ef614df8d068b990f6aa63 | 0  | 0  | 0  | 30 |
| 2919782ad30c913462d12df623be67c0 | 0  | 0  | 9  | 21 |
| 6b6b9d9be9d31f5c6d9f0dbe951881ec | 0  | 0  | 10 | 20 |
| f40d363b4ea1615c2518397afe6634c2 | 0  | 0  | 0  | 30 |
| 6590feae871172a1ba204dda94bbfaa0 | 0  | 0  | 0  | 30 |
| 15b151a9311ac6106d8f762a156c0fc7 | 0  | 0  | 30 | 0  |
| 350264c9f0668f7ea21401f7b4ffe2b8 | 0  | 0  | 30 | 0  |
| 378881cd48da626fc4c3830cf7369959 | 0  | 0  | 30 | 0  |
| 6076b85c5edb67c0329f90a9272b6c44 | 0  | 0  | 30 | 0  |
| c61d7a84eb9d231dd93f5bc727e29f0b | 0  | 0  | 30 | 0  |
| 1349e93387bf4bb6d74a80af77d775b9 | 0  | 0  | 30 | 0  |
| c4bf83782681fbdbd6a41f02544c3d59 | 4  | 0  | 0  | 25 |
| 5547ab7dc421b7ed09a56074737cbcd0 | 29 | 0  | 0  | 0  |
| 79175c26e494610956b6f13f92b1a193 | 29 | 0  | 0  | 0  |
| cb346f40b5fb2f1cd13075b005fcc48f | 14 | 9  | 6  | 0  |
| 63d593555c7e25f84db58cae305e94b3 | 18 | 0  | 0  | 4  |
| a99be86982f9a9eb2bf1e7d29898092c | 24 | 0  | 0  | 5  |
| 583bb43c3e597f110ae556107a11c274 | 13 | 16 | 0  | 0  |
| 77f376e5919909d9175a62bc0a8bde72 | 2  | 0  | 8  | 9  |
| 543c5b64317c02d77d6d82aa0ffa0893 | 12 | 0  | 0  | 17 |
| 1eaba4fd9cc2449bc9df287a23b73471 | 14 | 0  | 15 | 0  |
| ec0dfa462bd9fc2e7ca2f5864864494f | 10 | 4  | 7  | 0  |
| 69d7100ff16767432727955587c721c8 | 16 | 0  | 0  | 13 |
| 5d525b7dcc69342293682bf80dd8a541 | 5  | 0  | 11 | 13 |
| 4e73d56369ac84f07185a3c046dc2bd3 | 14 | 12 | 0  | 0  |

|                                   |    |    |    |    |
|-----------------------------------|----|----|----|----|
| 93a25495081282ce250365b62e1bd802  | 5  | 11 | 0  | 5  |
| 83786f2809f327447b54ab8a68468284  | 29 | 0  | 0  | 0  |
| 1e917ba570d4039251bca0d1ea368366  | 10 | 19 | 0  | 0  |
| ae684c289c42bb4c1df448890a445479  | 29 | 0  | 0  | 0  |
| a5eb2a2ac6d709b0b24c75207565c5cf  | 0  | 14 | 3  | 4  |
| af2f13f4d90e40853190ee822c28d44f  | 0  | 0  | 0  | 0  |
| e66f5520d3771d20707e6f947bd17c8b  | 0  | 13 | 0  | 12 |
| b0dfac6b89249154a03ee5b285ea31d2  | 0  | 0  | 0  | 0  |
| b9a605fd0c762a25d75b1936807b349d  | 0  | 7  | 0  | 0  |
| 15ddd11efe16b6d4feacd14f05db1ba7  | 0  | 0  | 0  | 0  |
| 9a6eb85a075f03656ae052f45ed15a75  | 0  | 0  | 2  | 0  |
| 963f3594895fa7f23a5238707f80bcb3  | 0  | 15 | 0  | 8  |
| b85780fb51d093ace65bbb66942c2f20  | 0  | 0  | 0  | 20 |
| af75682ec5b2fb05ac9aed5bab576068  | 0  | 0  | 0  | 0  |
| da4cbef156ac7e078eea989f873574f4  | 0  | 0  | 0  | 0  |
| c4b3dc979017067422044ba32a209435  | 0  | 0  | 0  | 0  |
| df8371d9cfeef960003e0125ae69de11  | 0  | 0  | 0  | 0  |
| 5cfa89aa18222f9523a9e7a91cde9356  | 0  | 29 | 0  | 0  |
| 6dad1b4a5c0a5503077f673e95708b07  | 0  | 11 | 0  | 18 |
| 7b5c05ecdac140bb2a8971c357c2daac  | 0  | 29 | 0  | 0  |
| 9939d517c10d25964e05c686a054a6e9  | 0  | 29 | 0  | 0  |
| cebc49aab38180ebc0e7a6e6dd24d997  | 0  | 0  | 0  | 29 |
| d9f4057807867946d2d0f3887dfcfe05  | 0  | 0  | 0  | 29 |
| 0d74aa5fea10f36b283eae8e24addd66  | 0  | 0  | 0  | 29 |
| 2b9f5488a8d36710e79270db469b1ec1  | 0  | 0  | 0  | 29 |
| 02bd69511f1a766e16a658869d09b9bb  | 0  | 0  | 0  | 29 |
| d61a63d71d3471122539d86a688f0486  | 0  | 0  | 0  | 29 |
| 4ccf9280aa3506737463b840f8fd2785  | 0  | 0  | 0  | 29 |
| 7dbe54db94c53107274616f892694e6c  | 0  | 0  | 0  | 29 |
| c6328e06ddb646323d78f94eac2f4cde  | 0  | 0  | 0  | 29 |
| bba3c4bf711af6ab705e592440b1ea58  | 0  | 0  | 0  | 29 |
| 2ae5b8f30eac48024be4ab7f709827c4  | 0  | 0  | 0  | 29 |
| dea7ede27fcefef4ab3b7cf35c45d1405 | 0  | 0  | 0  | 29 |
| 04e4999c74516acef84882ad4399966f  | 0  | 0  | 0  | 29 |
| d90e8d6131ee4af08ef53fc6c69bd6f3  | 0  | 0  | 0  | 29 |
| a8041e67aac7577e623befdb71aec6ae  | 0  | 0  | 0  | 29 |
| 41b699065f180f6511b85c510032a961  | 0  | 0  | 0  | 29 |
| 07c9e2aad58ad605045ac86d4e966b6   | 0  | 0  | 0  | 29 |
| 82b45bb09f702773dc892a244b1be675  | 0  | 0  | 0  | 29 |
| 24c0cce04a1ec8b49b90920d0015d60a  | 0  | 0  | 29 | 0  |
| 9dc2aec43f274e5600d32d6a38b23a1a  | 0  | 0  | 29 | 0  |
| 602f02ed75d085a9f7c23b2cff44b1ea  | 0  | 0  | 29 | 0  |
| bb1e0a176927d73f0c893a736ee9ef34  | 0  | 0  | 29 | 0  |
| ca14fcc7af6e0d6fdaf1e01fc235b23a  | 0  | 0  | 29 | 0  |

|                                  |    |    |    |    |
|----------------------------------|----|----|----|----|
| 6281b2fe88adf8391db692e0a9a5611e | 0  | 0  | 29 | 0  |
| d6d71e65f761fbce8cbfa701fb779861 | 0  | 0  | 29 | 0  |
| 90fa536f2aadf5d9eb47a82396361086 | 16 | 10 | 0  | 2  |
| b53f0a4378c47578ceafd8b3e9129169 | 3  | 15 | 0  | 0  |
| b9ddd6cda0d992508df0082bfd613567 | 28 | 0  | 0  | 0  |
| 4b8a34da635e64166b1e4e5223291ba8 | 28 | 0  | 0  | 0  |
| 0dbeff793c021b128040c0e641e06e03 | 20 | 0  | 0  | 8  |
| 19695795014180be322ab896f7971467 | 28 | 0  | 0  | 0  |
| 6ce57cf5a320697c9d4daa77791d5e07 | 23 | 0  | 5  | 0  |
| ce211db765d0fb533107dbb2b0254de4 | 28 | 0  | 0  | 0  |
| 6eb1bdeabb491a3ea8e6b5660c8449bc | 28 | 0  | 0  | 0  |
| bd4ca602215c99de4f6eb7ac95a7612b | 6  | 0  | 0  | 22 |
| 931f8da4355437b917d4864f2c81fabf | 12 | 9  | 0  | 7  |
| e9762e30dab2be9326416f600ae89b19 | 13 | 15 | 0  | 0  |
| 9e52554b1105030c5372be50cf86625b | 9  | 0  | 19 | 0  |
| e85b6e887f5154f24686c4aeadd75b23 | 6  | 0  | 4  | 8  |
| 6833d77dfea982286a03aeae5ceab146 | 28 | 0  | 0  | 0  |
| c84ccac2ec55db179c5731621db1af04 | 13 | 15 | 0  | 0  |
| f4a38b307f8c2977458ed9565f0840e9 | 14 | 0  | 0  | 0  |
| f4923030cbe69694000a126a12e41525 | 7  | 9  | 0  | 0  |
| 05560b739bb346941da0c347096c5b64 | 16 | 0  | 0  | 0  |
| 73afe98de93a1945d15ab43a988506d4 | 3  | 0  | 13 | 0  |
| 6ef27064b6d8c0acb567e524e9e7d7cf | 28 | 0  | 0  | 0  |
| 702bb11a31802aaebb48281b6102ebd1 | 0  | 20 | 0  | 5  |
| 6edc2b5323c91db6ff07adc8da90fc9c | 0  | 0  | 0  | 10 |
| ac5da2c3752edbcf9ea1781564d1eaac | 0  | 0  | 20 | 0  |
| ac7deb1f4591785cb73e03b07c7c40f8 | 0  | 0  | 0  | 0  |
| 61090f352ea0c458a24927547863ff8a | 0  | 0  | 0  | 0  |
| de76ee5e80a47f02d62aa57e161b9be4 | 0  | 0  | 0  | 17 |
| a43b117e9af164c1e42c572bbd3e69c4 | 0  | 0  | 0  | 0  |
| 1dfa070b931d2ec1a41f184f612b9526 | 0  | 0  | 0  | 0  |
| 0239bd3c001898205aa0677b8d600454 | 0  | 0  | 0  | 0  |
| a5c10556aefec6f700a8e4d32b5f863  | 0  | 28 | 0  | 0  |
| bacac0682212c5632da56e494eee7344 | 0  | 28 | 0  | 0  |
| 3d03f07a2d8291671dec822e932be208 | 0  | 7  | 21 | 0  |
| 8a9ec79daad7c84b8a3b309d1afc3966 | 0  | 28 | 0  | 0  |
| e7508f5ca898a246f7d37b969b9ef1da | 0  | 17 | 2  | 9  |
| 86c9f0f0662e18f92e0337a94d7237f7 | 0  | 15 | 0  | 13 |
| e2f5fc6b805a2149bada30ab36a6d438 | 0  | 11 | 0  | 17 |
| 853bdb588b33b0a6c34a6d52daee7ccb | 0  | 19 | 9  | 0  |
| 8cb947c1351041d8de80abd00255eb4b | 0  | 28 | 0  | 0  |
| e58988ee90a1cf289f29e11f9076c2b6 | 0  | 7  | 7  | 14 |
| bb76a2d0c7bdcfd673beadcb0d159d90 | 0  | 28 | 0  | 0  |
| e8aa413e9766929edc8acfb68d895cb7 | 0  | 0  | 0  | 28 |

|                                   |    |    |    |    |
|-----------------------------------|----|----|----|----|
| de2cf0b623c908b537e9ba79ee78ccdb  | 0  | 0  | 0  | 28 |
| 757270ce180f78a280b20619b78ea5e7  | 0  | 0  | 0  | 28 |
| 367f2ed15cf11b6390548323630979bc  | 0  | 0  | 0  | 28 |
| 313739a6270e298cfc694c71178252d2  | 0  | 0  | 0  | 28 |
| d1271a8b3731a0336735fa278f5e6987  | 0  | 0  | 26 | 2  |
| c6e5237c3f98f05f2fb5dd2c85a7b984  | 0  | 0  | 15 | 13 |
| 266c3ba93c2c7c4d66a72c4203c4b130  | 0  | 0  | 0  | 28 |
| 126ba7e651a617e024f29d13b44ff6bd  | 0  | 0  | 21 | 7  |
| 137173ea73d581315ce32417dd2a0a73  | 0  | 0  | 0  | 28 |
| b590a1b16212fa58da08ee839178c5f5  | 0  | 0  | 0  | 28 |
| c79309a722ab4d799ea2f8fb4863266d  | 0  | 0  | 0  | 28 |
| e1a3c7750e1be4841050fe77fbb25013  | 0  | 0  | 11 | 17 |
| a2ea35bd0dabc7d4226ebfef6095bf78  | 0  | 0  | 0  | 28 |
| 2af2546a69d47563603449871bba0054  | 0  | 0  | 0  | 28 |
| 7f64941f8c654d168f2b7034c8c131d2  | 0  | 0  | 0  | 28 |
| 2aedc45f0d95e4a0aa910d784d9a157d  | 0  | 0  | 28 | 0  |
| c95052b8ca200dee6c47f7102fa294ed  | 0  | 0  | 28 | 0  |
| 16084cd9d55a3f7955298e6a8d21ed0a  | 0  | 0  | 28 | 0  |
| 71102f5ef00eaaaf52ec87c7dd32a6201 | 0  | 0  | 28 | 0  |
| afabc129a50f77feeb7ae71cee7e1523  | 0  | 0  | 28 | 0  |
| 9ce0fe34d406beeb560da52408111f19  | 0  | 0  | 28 | 0  |
| a4e3bd86a2d71a7cbb8e567ac3505b7b  | 0  | 0  | 28 | 0  |
| a3b85d191c87d211185b83d276c89c57  | 0  | 0  | 28 | 0  |
| 8581c3cb4c86fb6ad46eda0db727ebd3  | 0  | 0  | 28 | 0  |
| 7badb86db6e072d3b37e27bd938ac741  | 0  | 0  | 28 | 0  |
| d8d2547e10026c0dab76e4e938567f33  | 27 | 0  | 0  | 0  |
| 471e90c679207574fc4a9c268878e731  | 27 | 0  | 0  | 0  |
| 6a7948e7b055608cad7d2f02d6cbcd1c  | 13 | 9  | 0  | 0  |
| 353a2715da64f85afeb3c5b69a26cc1b  | 19 | 8  | 0  | 0  |
| 2ceadf5468558da72c1f2d64e5f5cc7e  | 18 | 0  | 0  | 9  |
| 3f83347fc976841d5a86450b8a1f7afe  | 2  | 0  | 13 | 9  |
| d0207e99fd6fd6c14046e63913c56082  | 7  | 20 | 0  | 0  |
| 065f1a23d1c12cd4c035710f564d4a72  | 14 | 13 | 0  | 0  |
| 470fff44b7a8e78dc9eecd8aa3d74d9   | 6  | 0  | 13 | 0  |
| 8a1ae78beb2894e067ec4aad1807999   | 14 | 11 | 2  | 0  |
| cf427e9ce43b9c7ee6a943867d7947f   | 27 | 0  | 0  | 0  |
| 6352b0a6da653563b2b52ab19b333a21  | 27 | 0  | 0  | 0  |
| 6c803913203ca13639bec9d2a7a94ff9  | 27 | 0  | 0  | 0  |
| 2f02c8740254c969513faf8718b1ee47  | 12 | 0  | 0  | 9  |
| d13c07af2c3dd6ee135e4bbea31b2c9a  | 17 | 0  | 10 | 0  |
| e3dc620696b32647c0e2a284fd84dde0  | 27 | 0  | 0  | 0  |
| 5d5b63ab0f7a35eaa3a093e7148d5c5c  | 12 | 15 | 0  | 0  |
| 85c1e1bbff3c5d4c28f1917f00a6b04e  | 15 | 12 | 0  | 0  |
| 452e795c02fdae61b8f6c01ce564e14e  | 4  | 18 | 5  | 0  |

|                                  |    |    |    |    |
|----------------------------------|----|----|----|----|
| 597159ecb63e998ec9167310c09553e7 | 27 | 0  | 0  | 0  |
| a3ec158cba3be1657bbbad6f3961c749 | 3  | 24 | 0  | 0  |
| f3a97ea8920cb71301dee4044bd55cf0 | 0  | 18 | 5  | 0  |
| c1e28c6f5f04799d99d0711f3a1bfc65 | 0  | 0  | 0  | 0  |
| e17a9967e2e2e01bac9d38d5ae29ecff | 0  | 9  | 0  | 5  |
| e0c931559ffd3ff4b7721301888aa05d | 0  | 0  | 15 | 0  |
| 589faaf2c980b2ea0457d0ebacf0bb53 | 0  | 19 | 3  | 3  |
| 21b123e5b0d4ee2bde44f155808235f8 | 0  | 0  | 0  | 0  |
| 6219339b43a621754477d7b3847600ff | 0  | 0  | 0  | 0  |
| 7911511c005297fb91bd8ef8ea2cc44c | 0  | 0  | 0  | 0  |
| 2e3d3b330be5ba737de813efa8326a83 | 0  | 0  | 0  | 0  |
| 296960418086b56202cf601f2dc1fe0b | 0  | 0  | 0  | 0  |
| f3d611ad425d80fdd6a9144ef0e2f7d8 | 0  | 0  | 0  | 0  |
| 895b5191a8c070aa02530921e1e78dea | 0  | 0  | 0  | 0  |
| fa5db1dd953551aa8777e7c926f61cc4 | 0  | 0  | 0  | 0  |
| 741f4be7590c4dfb5f90864182540964 | 0  | 15 | 12 | 0  |
| 8d81d70a3d1f0679c344e1333cf92b0c | 0  | 27 | 0  | 0  |
| 5dd88076100061ce30c42e8f8a32dab3 | 0  | 27 | 0  | 0  |
| c0c625eefac5e013c746317583f7e134 | 0  | 4  | 10 | 13 |
| 40fc18a6bdc9dad35af759d29a3c703f | 0  | 10 | 10 | 7  |
| ff6a23165548da06e4043bcae119361f | 0  | 27 | 0  | 0  |
| 588533b729a08c0b3075e10d51db43fb | 0  | 27 | 0  | 0  |
| 533995e14bb1bff1a48c3574e8a54541 | 0  | 5  | 22 | 0  |
| db66b2ff875d3dba91622c84cc6d6780 | 0  | 0  | 0  | 27 |
| fc72720682307654d3560ea1801cfe08 | 0  | 0  | 0  | 27 |
| fb32c3483bb80a4bfa1307efc9f70bad | 0  | 0  | 0  | 27 |
| 0e27a0fef39aa84037214a03c203181a | 0  | 0  | 0  | 27 |
| 99c449be72c4d3148562689a6e01c511 | 0  | 0  | 0  | 27 |
| aeb43376d2fa795d91f71bd88bbe87b4 | 0  | 0  | 0  | 27 |
| 34ead2a3259c016db4b5994ab54042a9 | 0  | 0  | 0  | 27 |
| c6e57375a68e7252dbdb4559151c46f1 | 0  | 0  | 7  | 20 |
| 4192a1b0ebf6262c4287fcbd77867b0b | 0  | 0  | 0  | 27 |
| b8a2ef7e4c430940b9133db05c1ef22a | 0  | 0  | 9  | 18 |
| ce0ee5e22457be28287aeac0a1f2f235 | 0  | 0  | 0  | 27 |
| 8d4f4f64024a0e5adb8d3c7a2fa5fd98 | 0  | 0  | 0  | 27 |
| 991516e8ce2f3a4ad19569b1f6ed6a16 | 0  | 0  | 27 | 0  |
| 2f32a425362f127eb2ff67ec98b0971d | 0  | 0  | 27 | 0  |
| 256ca7ebba30b89fc3c81e5ebff6e579 | 0  | 0  | 27 | 0  |
| 425ed899afdb282c519aa635637117f4 | 0  | 0  | 27 | 0  |
| b50ad6dcab96043a4bd0629ebc3ff54d | 0  | 0  | 27 | 0  |
| 1d9194f4bdde44f0a8b504b9d6efadf2 | 0  | 0  | 27 | 0  |
| 5a53849c0716b5028be92f40b2acb01f | 26 | 0  | 0  | 0  |
| 3efda006c0170b58b16cea2d59f6abbb | 26 | 0  | 0  | 0  |
| 0aa74e5c5928178a14ecc74ce3bbdb7b | 9  | 4  | 3  | 10 |

|                                   |    |    |    |    |
|-----------------------------------|----|----|----|----|
| 22735dc04356008146cbdd346d2829e0  | 12 | 0  | 0  | 14 |
| 944d454586bd0b71c8e83a0c582d40b4  | 17 | 0  | 9  | 0  |
| 5c6f9073c265c7fad87dba5a1f072b7f  | 17 | 0  | 0  | 9  |
| 4318456c503083209591d1a2b6551f93  | 5  | 13 | 0  | 0  |
| 315b2fc195c35a473a0e72a0c8b6177b  | 9  | 13 | 0  | 0  |
| 87f117793db1469a7b256b9dbd32242c  | 5  | 10 | 7  | 4  |
| 6887573d6bbe742d331a8840790c0642  | 14 | 0  | 0  | 6  |
| 7a195606293a69b5171f3da88bd59e2a  | 26 | 0  | 0  | 0  |
| 34bc1442fef3e8690059335c28556c8c  | 22 | 0  | 4  | 0  |
| 52aa63684ba07c01faba4711af81fc46  | 26 | 0  | 0  | 0  |
| 6722ccecf61750d60c41e156a59af7e87 | 4  | 0  | 2  | 17 |
| 10534d0956aa22d0404d8da3f45b4047  | 26 | 0  | 0  | 0  |
| 44d725268bd44a83c393675f6cdcdbc   | 0  | 0  | 0  | 0  |
| 359f982795f993a6e0a610b1564a1217  | 0  | 0  | 0  | 0  |
| f3b071e750aa24373ad99b252b5f6b35  | 0  | 0  | 0  | 0  |
| 7ae2b98b092baaf5480b1e7f3d3513d2  | 0  | 0  | 0  | 0  |
| 4d242c0441fbee3d2e984fb487e5b0b7  | 0  | 0  | 0  | 0  |
| 93059241274742f68dbe985226f54b5f  | 0  | 0  | 8  | 0  |
| 1347f86be00d53e9b84707df0d0a7eee  | 0  | 0  | 13 | 0  |
| 793cc7765bfce8185630af2b6bd8a032  | 0  | 18 | 0  | 0  |
| 1083a72f557bde4bdc2ada966f512c96  | 0  | 0  | 0  | 0  |
| d1283c064596e0b4ce0b011a170d4277  | 0  | 0  | 0  | 0  |
| 5f8d8f0f636dda02d325882e184c3d93  | 0  | 0  | 0  | 0  |
| 475b9e51cc1c85eaa718c8849f0b0009  | 0  | 0  | 0  | 0  |
| fda9966ce99991619b6661fa7b3c4d3f  | 0  | 0  | 0  | 0  |
| 94c7fcca4b8fa08bb8691a6c4b1764ba  | 0  | 0  | 24 | 0  |
| 7ded34f6242ebfc3931ae8a31ed7beb5  | 0  | 0  | 0  | 0  |
| b832beca049b800831cf22f8bd8ee1b4  | 0  | 0  | 0  | 0  |
| 04fad2756eb92c1bff6e86e6b37d1ea8  | 0  | 0  | 0  | 0  |
| 0c2d0a00a659b565b68a59e7cfd857ed  | 0  | 26 | 0  | 0  |
| 363ba1ebf0dc46b81257e76fb0680459  | 0  | 15 | 0  | 11 |
| 76a7a61f9f8e220f18e82e9dbcb4f914  | 0  | 7  | 0  | 19 |
| 018007d37b34d29ffde993f7cfef9003  | 0  | 26 | 0  | 0  |
| 7419c2fc261ad8775ad1cdb390017d8a  | 0  | 26 | 0  | 0  |
| 01d1c87cfa4d87e3eeb36eedf44410db  | 0  | 26 | 0  | 0  |
| 8543b96b4a014f2a96a680850b0d4903  | 0  | 26 | 0  | 0  |
| 57e2229703d030d423d341e241159b65  | 0  | 26 | 0  | 0  |
| e390a4ec7ce92ac806891dd401b3cc83  | 0  | 26 | 0  | 0  |
| b92057e111c4dfae5aa331a6e1bbb063  | 0  | 10 | 16 | 0  |
| b74c7adb8f78429c9dc1a0e9fa3a716f  | 0  | 0  | 0  | 26 |
| 1282ec5f52882fa608f8aacf1ee508f3  | 0  | 0  | 0  | 26 |
| ffe88c25a3a0d5abd26f359da7adc3ed  | 0  | 0  | 0  | 26 |
| 10f5eb968f3b2dc64b7f7a7ac25d9aac  | 0  | 0  | 0  | 26 |
| f5380ab118d48597bc6acb7435c0c9ed  | 0  | 0  | 0  | 26 |

|                                   |    |    |    |    |
|-----------------------------------|----|----|----|----|
| 74743c89c74ad83dec9a87a0e66454df  | 0  | 0  | 0  | 26 |
| 29f5105d3e664eff8280e4f3f2902397  | 0  | 0  | 0  | 26 |
| 65f0d13ea53c8618477ac1f16ad528b9  | 0  | 0  | 0  | 26 |
| 80cd4659af94443ca3fe3020be008f40  | 0  | 0  | 0  | 26 |
| f46b086e119340561a6096af830e0df8  | 0  | 0  | 26 | 0  |
| 8d8a5b6f94243cc145780d5109629ac9  | 0  | 0  | 26 | 0  |
| 971ed3dfa5c9db5a728cdbad8bbae90d  | 0  | 0  | 26 | 0  |
| 0ac461e6125968e0375ce20488ff121d  | 0  | 0  | 26 | 0  |
| e858283d5c05a285a0a57effc7c0654d  | 0  | 0  | 26 | 0  |
| 94b75fb53b11574eeb261a51cd56b28b  | 0  | 0  | 26 | 0  |
| 613bae6379fb95272669e12a73005ad5  | 0  | 0  | 26 | 0  |
| 590812abdbc2c9ef1a8dd40a72dddad6  | 0  | 0  | 26 | 0  |
| 87838a5cc5e6147f751fc7072c1b3f6e  | 0  | 0  | 26 | 0  |
| 6d988a4254fde60d973702d6245d5ed1  | 0  | 0  | 26 | 0  |
| d1c6ecbe3581d02c71b88df77c3fb4c6  | 0  | 0  | 26 | 0  |
| 649ad28c395fe407bbb4ecac7fcec51f  | 0  | 0  | 26 | 0  |
| f1bc4a1f50acccecd6512b1ab800d9b1  | 0  | 0  | 26 | 0  |
| 0fda810a7742cc48df988fbad6d5cd1c  | 0  | 0  | 26 | 0  |
| 3335fd638092a8145d6aca4a948f4809  | 0  | 0  | 26 | 0  |
| 55596bcd83babbc9da4917fdb663b5d   | 25 | 0  | 0  | 0  |
| 9759af4e8afd68faabfd63f986390477  | 7  | 5  | 4  | 2  |
| f496aeafb64d299e1070eba34e00e9b0  | 2  | 10 | 0  | 13 |
| f0d09f723ec95618cfa5b53b3ded26a7  | 13 | 0  | 7  | 5  |
| 9ae62eea894cc07c77126bff6f53c4fb  | 4  | 5  | 0  | 0  |
| ceed415f552623f7a7d1f6f56b8cf06c  | 25 | 0  | 0  | 0  |
| c8c4cdc2b9b556d632b99362eae1e979  | 3  | 0  | 7  | 15 |
| ed5f21e9f2b8fe3fa847b0ad13160317  | 25 | 0  | 0  | 0  |
| 4706483bc8474aaa06dd07854b51ec81  | 9  | 0  | 0  | 12 |
| 71994c438f06eebb4bc32149b0520c1e  | 18 | 0  | 3  | 0  |
| d65f0ee504b0f9456b7e6654b5085f6e  | 14 | 0  | 11 | 0  |
| 77b58c015a8aabd16e2fccd8a15a97dd  | 18 | 5  | 0  | 2  |
| be80c35a88dae210044e5586cdad72d3  | 16 | 0  | 0  | 9  |
| fbfd4795a6cd871a33b137a75703c8c7e | 25 | 0  | 0  | 0  |
| 93b6b265029a9d7de93abed796dda907  | 5  | 6  | 0  | 0  |
| da0e4eaa4b9d0a45ffd90d5c1153937c  | 25 | 0  | 0  | 0  |
| fc4bc2bf8a4c320bc4cc1bda14f6ff4a  | 0  | 0  | 0  | 0  |
| d7c0491378e29fbb0fc65ad32e28bed4  | 0  | 20 | 0  | 0  |
| 1e71ba532775b018954874ac4daa29d9  | 0  | 0  | 0  | 0  |
| c74dc68078996f6d7b8814e3658dace6  | 0  | 0  | 0  | 0  |
| 788c4c438f9c898dd3ed3bf23388a481  | 0  | 0  | 0  | 0  |
| b31a796c6a53ba19179fb5b89b464fb8  | 0  | 0  | 0  | 0  |
| 7d8c7744e17ed37b2f6d59d4e04e02b4  | 0  | 0  | 0  | 0  |
| 653e8c05682de85849b62fbd910ba09a  | 0  | 0  | 0  | 0  |
| b57df2c7031c936f20fd454ac22fddd6  | 0  | 0  | 0  | 0  |

|                                   |    |    |    |    |
|-----------------------------------|----|----|----|----|
| c2416f681dc22cfd418f4935cd635359  | 0  | 21 | 0  | 0  |
| d56d7e02f1371c9087f817e6b7c0e38b  | 0  | 22 | 0  | 0  |
| 067fad1eeb996075dee651bbf6d16517  | 0  | 0  | 0  | 0  |
| 0677db98e089ed61e4a0c8e96142f4be  | 0  | 0  | 0  | 0  |
| 1378709aeb7007e4252ca330c87d8a72  | 0  | 0  | 0  | 0  |
| 548dcbeb3a48ba924472fd4fa898969c  | 0  | 0  | 0  | 0  |
| b4349692d78226d72ec3933972349d97  | 0  | 0  | 0  | 4  |
| 045ae7421c8fac0256324470b7e46e9b  | 0  | 0  | 0  | 0  |
| 73d08ddb5f3f5fcf2aa35c74afac85bf  | 0  | 0  | 0  | 0  |
| 0ea2abefa4b15237555d1a81cd4683d3  | 0  | 0  | 0  | 0  |
| 3424c37704bb52b0a9ab5da731b6324f  | 0  | 0  | 0  | 0  |
| 7b4e3e3ede55fc5ea0478585c7f6e68d  | 0  | 18 | 7  | 0  |
| 080f0474460b8d6e8a4d0b893856564e  | 0  | 16 | 9  | 0  |
| 8fcc1876792c4584b6ecc9d861ebff55  | 0  | 12 | 0  | 13 |
| a91bf3ee08f2ea4b27418cc586b67702  | 0  | 25 | 0  | 0  |
| 4dfe4b9ae6d9359e3b602b8d8155c7d2  | 0  | 5  | 6  | 14 |
| 82b11cbd3ef4f9e90fe0d194b21c6456  | 0  | 0  | 0  | 25 |
| 658ecfe8d8630ef022cc90788f5e91f6  | 0  | 0  | 0  | 25 |
| b1069f29dab42417d703a05647c61c3e  | 0  | 0  | 0  | 25 |
| f6f6d525efca8c72d3114db8b467c1a0  | 0  | 0  | 0  | 25 |
| 570202918ab9e966e5c821d8eb015936  | 0  | 0  | 12 | 13 |
| 95ef540343b890e46a26f892cbdfce4c  | 0  | 0  | 0  | 25 |
| eda8297b6d3de2035dcfa29da42b30ac  | 0  | 0  | 0  | 25 |
| 940ae96d1e749d429db7f132ed11e8f6  | 0  | 0  | 0  | 25 |
| 7e3ff98190ab94141f0467ae853bbe25  | 0  | 0  | 0  | 25 |
| 112feba8d71b11d4e66ff237a5de77d5  | 0  | 0  | 0  | 25 |
| 048e2be2775ece8237d7dd939e763d6d  | 0  | 0  | 0  | 25 |
| cdf759099ce759dcd347950d37a29a28  | 0  | 0  | 25 | 0  |
| 76200382ba84f42aa74275a718a00db5  | 0  | 0  | 25 | 0  |
| 750e8ed8b900a79f4c964fe82b080546  | 0  | 0  | 25 | 0  |
| d01d2c21b663f58a2a4cd06fba06c509  | 0  | 0  | 25 | 0  |
| 8dcfa8911c31f9a04f4f06dc0539dc5e  | 0  | 0  | 25 | 0  |
| 7eafba377b606bcec86ec4325cfe1bb7  | 0  | 0  | 25 | 0  |
| 121c912a5dbae0e418f11c4eef349262  | 0  | 0  | 25 | 0  |
| 778af33e32dd51d27d2e8921c3077c1e  | 0  | 0  | 25 | 0  |
| 3e91e6eb9f05df97bb0fe01d2a1dd804  | 0  | 0  | 25 | 0  |
| ae6363e0f387facb5107d166cd41fce1  | 0  | 0  | 25 | 0  |
| 750bdd3fdccd1ace39f22d411d2cf36d  | 0  | 0  | 25 | 0  |
| d73078cdb0f7622e1ff9fbe983adebae  | 0  | 0  | 25 | 0  |
| 2abf853e465ba014d2bb7e0d097e3235  | 0  | 0  | 25 | 0  |
| d2fca1e3b05d7be96ddb7ca4385528a4  | 24 | 0  | 0  | 0  |
| cb35c6038aadec6375a90337ef3d911b  | 3  | 0  | 19 | 2  |
| e27dd43ac7be780a69bf6dc0a02c3cdf  | 15 | 5  | 4  | 0  |
| 45ebdf77d944f6229815aa47daciaa277 | 17 | 0  | 0  | 0  |



|                                  |    |    |    |    |
|----------------------------------|----|----|----|----|
| 5c4140214c4192e67a2bc186d3781735 | 14 | 0  | 0  | 10 |
| e8fbf237deee2769fce2059ebb61ba5b | 10 | 0  | 14 | 0  |
| fa7ea00bcebb1dc758839bc30a60c1d2 | 6  | 0  | 18 | 0  |
| 09c5df2d563e54168886d6780796cf54 | 24 | 0  | 0  | 0  |
| 7198863d7ae33f0f02105176ab485bfc | 3  | 4  | 0  | 17 |
| bb2daf6cad314540134906032b94ea98 | 19 | 5  | 0  | 0  |
| 6c883819989b4045c5da046ba8b80119 | 24 | 0  | 0  | 0  |
| 19414d3d3c87e3939aa11fdbeaaf2311 | 8  | 9  | 0  | 7  |
| 5da92b3df99df2449c5d2d475aedfeee | 6  | 0  | 13 | 5  |
| d7fac85887d05f96c19f7c07548a31d9 | 4  | 0  | 12 | 0  |
| e5ab23a5ab69ac1bda9ab3d36418ae5a | 24 | 0  | 0  | 0  |
| 403ab95180490c2d2ffe9f5a6562733e | 10 | 14 | 0  | 0  |
| 8ae6f1ef597cd1cac21004cb44362c2e | 0  | 0  | 0  | 9  |
| a7533d4f20595cc839b456e184db3902 | 0  | 0  | 0  | 0  |
| dd9ca4366fea6f1565c5fb77c3eb921d | 0  | 0  | 0  | 0  |
| a4c9905d82bb8324b5d93acf409aa473 | 0  | 10 | 0  | 0  |
| 260e23cd49de64ee517cdea80c2d8723 | 0  | 0  | 0  | 0  |
| 0944449a7b81582d3cb295a1d949bbf0 | 0  | 0  | 0  | 0  |
| 7889c050074254c2592f9f6b0237a302 | 0  | 0  | 0  | 0  |
| 7bfb85be74f56547df564bbd7d391a34 | 0  | 0  | 0  | 0  |
| 480b49dd1d13b1ba21c35c0d735d11b0 | 0  | 0  | 0  | 4  |
| 312143058d27f16dd5e00b406782ec77 | 0  | 0  | 0  | 13 |
| 42bab2eae3b5bb29292dff42b88c0623 | 0  | 0  | 0  | 0  |
| 53e930ae2c356bd5d906a7f777888c9f | 0  | 0  | 0  | 0  |
| 09c680f0a480ad4ef689c55a8a5e3daf | 0  | 0  | 0  | 0  |
| 4fc25262c3c1841139a66d6eb7fee630 | 0  | 0  | 0  | 0  |
| 489729cad838a6cd475c3d9b269f7c45 | 0  | 0  | 0  | 0  |
| bc23ed13caeab03a2135e0a0131f58e1 | 0  | 0  | 0  | 0  |
| e5e8e22eefa8e9cb35ad413ff674e340 | 0  | 24 | 0  | 0  |
| 68976e9ef5090d428ff66a90c941b807 | 0  | 24 | 0  | 0  |
| d214ba2bff38906eff55a1abee2536aa | 0  | 24 | 0  | 0  |
| e9d475ec2d364726c772683027fa46fd | 0  | 24 | 0  | 0  |
| 6cd2fefe48acfce624b6ec78eea0654c | 0  | 24 | 0  | 0  |
| 9dcef1416008493350afb365d56f5d60 | 0  | 9  | 0  | 15 |
| 5813e6561644bd1d241eea221a836475 | 0  | 24 | 0  | 0  |
| ba9a9047dce90c1e3ae60b8bd7d2d363 | 0  | 24 | 0  | 0  |
| 9bf890755aea24b3b4a822ecb4ffdbfe | 0  | 12 | 0  | 12 |
| 8aae96134ff874a0823c4815e60201ee | 0  | 15 | 9  | 0  |
| cc330d94e49b4cf16fff1726a02614ee | 0  | 24 | 0  | 0  |
| 5cb13cb4e7810c97e9a6b4ff75a59d35 | 0  | 13 | 11 | 0  |
| c8dfc3cf007ab8e17c89dde09217dd76 | 0  | 11 | 13 | 0  |
| 9eb71e8d44bd35727aee390d113ce4fd | 0  | 4  | 0  | 20 |
| 9ef505fe905d69a00db356742503c7bf | 0  | 24 | 0  | 0  |
| 4cc8389ec23a75fb284cc9509411374e | 0  | 11 | 0  | 13 |

|                                  |    |    |    |    |
|----------------------------------|----|----|----|----|
| a25d77c5ea7b3dcd7b49b57e9bb67c63 | 0  | 0  | 0  | 24 |
| f30eaf0e07cc49f0ccf049c68e68440b | 0  | 0  | 0  | 24 |
| eeb382a10e85113aed5ddb68dedcb207 | 0  | 0  | 0  | 24 |
| d864dd7e9b9582fefb837b5027f7689e | 0  | 0  | 0  | 24 |
| a486e056ece20451e8b290bbec699300 | 0  | 0  | 0  | 24 |
| 64a25c320e84931b15afb55f37212b4a | 0  | 0  | 11 | 13 |
| 579be98be99e25ad2da0121c0887ed5a | 0  | 0  | 0  | 24 |
| a3ad6e894cb104f175c861f930e17d22 | 0  | 0  | 0  | 24 |
| fdb43fd7b801c3f7fbec56c58115fcb5 | 0  | 0  | 0  | 24 |
| 3849603350a9b836616f2dcae0847f23 | 0  | 0  | 0  | 24 |
| b5c7c31893207b4424aa9f06d5369af0 | 0  | 0  | 0  | 24 |
| 42c4789a935242c88db4b96e870b0bda | 0  | 0  | 24 | 0  |
| 9e116c73c7d46cf10e8a1088d125de77 | 0  | 0  | 24 | 0  |
| 04abf19385c8fbc225dccbe47d0a6a   | 0  | 0  | 24 | 0  |
| abd9c7c22e7dd8101c1faa4a98e7c8ac | 0  | 0  | 24 | 0  |
| 3d298b35173b7812cd126fcfa7dd16d7 | 0  | 0  | 24 | 0  |
| 248b24799e97d0ea7c613cb8b8657f33 | 0  | 0  | 24 | 0  |
| 2fe71b97be2b79ef2d600d6cd496297c | 23 | 0  | 0  | 0  |
| f3ae2eb24ff35ebf838441fe0d0e27f5 | 23 | 0  | 0  | 0  |
| 3ab519e4c4156382798def650cc1f11e | 23 | 0  | 0  | 0  |
| d8c90f771e0ba681f2c81dbf000369f6 | 23 | 0  | 0  | 0  |
| 108dfb97b024c01ad52c2505101f2fbe | 23 | 0  | 0  | 0  |
| aa9161ff6564461ea7b8dee44f2e5980 | 23 | 0  | 0  | 0  |
| 79d8de2cef04ff1f9e6cdc2b1d621b3c | 23 | 0  | 0  | 0  |
| 09ffefd10612d69b04a5506948a2c8c1 | 7  | 9  | 0  | 0  |
| 250daf6c791429c5a83658212043ef67 | 5  | 0  | 6  | 3  |
| a4ba74f304faf4c5ee5af39b408bd1d8 | 3  | 0  | 4  | 16 |
| a1013fb58cf15aa9c9188dcfabf75c54 | 4  | 0  | 0  | 19 |
| b4fcb3403a025956420603032893f24c | 15 | 8  | 0  | 0  |
| c2aabb986b7ac7a2b9e8486c48f641b  | 14 | 9  | 0  | 0  |
| 5c58b518a139437e9f12765fff03804b | 8  | 15 | 0  | 0  |
| 80a4fc96d82254b4a7cc72370abdb0e1 | 3  | 0  | 0  | 20 |
| 7cae8c54851bbf2019e742fb5f0bc980 | 16 | 0  | 0  | 0  |
| 79b3bc4eb5fc0eda7698eef539e3c63c | 4  | 5  | 3  | 11 |
| ff28826671e0e473e876b3dc8ca57d0f | 23 | 0  | 0  | 0  |
| 03ff4a1a72a5ff9a041ce232eda8a453 | 13 | 10 | 0  | 0  |
| 0318fd321c2c4869daeee2ce3a4fe49f | 2  | 6  | 3  | 12 |
| 854211c59c4da778cf326d31b8acd58c | 23 | 0  | 0  | 0  |
| 6106bce5382864b39ea8eb7667f24a6f | 23 | 0  | 0  | 0  |
| 9290a13729a41c48b115171bd473a905 | 0  | 0  | 0  | 0  |
| de7eb04b3faf67c322073e49bd56bf83 | 0  | 0  | 0  | 0  |
| 4644ae5e47242883eace0cec9147b450 | 0  | 0  | 20 | 0  |
| 0f4fb2372686b5c13173076b5c16017d | 0  | 0  | 0  | 0  |
| 8960f3ce36a087ffb607363816c26499 | 0  | 0  | 20 | 0  |

|                                  |   |    |    |    |
|----------------------------------|---|----|----|----|
| 63afb819df8304a5a6bef3eaef19a3a2 | 0 | 0  | 0  | 0  |
| 213cece71c52495c5da4b58fadf7e708 | 0 | 7  | 0  | 2  |
| 35a6aea577e3f0aa7f001731705498dd | 0 | 0  | 0  | 0  |
| c6c58d019f7c9f342e42b6c772cb07f4 | 0 | 0  | 11 | 0  |
| 757c20cf7db34e2266dcd9a76e55ceca | 0 | 0  | 0  | 0  |
| 1797cdb1063c874b53bd6b2c769fdf3c | 0 | 0  | 0  | 0  |
| 7965752a099f8667adb197fd681d93a2 | 0 | 0  | 0  | 0  |
| ffe274cc36b298a676593d12857f79ff | 0 | 0  | 11 | 0  |
| f58e4f666472776d3afebfb6b85cfaf2 | 0 | 0  | 2  | 10 |
| 9be8dc8d9d0785ffaf6dbcb1fbfce05e | 0 | 0  | 0  | 0  |
| 71ce06fa5c7d531fab8650317d61a855 | 0 | 0  | 0  | 0  |
| 24fa72ef154198c5729ead3824e1093f | 0 | 0  | 11 | 0  |
| 29d4f45c452fe687faefd80a656d5ab4 | 0 | 0  | 0  | 0  |
| 0b833113ed0fb1cc1605d6a8c9e1acf0 | 0 | 0  | 0  | 0  |
| a3c1831c228297093bfd02b79b2e67b  | 0 | 14 | 0  | 9  |
| b9119d3d03491db2849680669ba93d42 | 0 | 23 | 0  | 0  |
| 9c6ca1406e9af57294b9f9ee67a03b40 | 0 | 23 | 0  | 0  |
| 771d3786f2c1e79094cd81035797ffd9 | 0 | 12 | 0  | 11 |
| eeafca58ec0a4c76ddfc2fa2c9581139 | 0 | 23 | 0  | 0  |
| 4e6e2d31cb0afb312a92e21d2383af71 | 0 | 23 | 0  | 0  |
| d14414818d51ccab2968aee7941f8b28 | 0 | 23 | 0  | 0  |
| 65ca1773f6bb03a43c99f0abd85a557a | 0 | 23 | 0  | 0  |
| 6a9b870541e5173cb0fe0f062827a94a | 0 | 23 | 0  | 0  |
| aea57f2c1cf742cab5de316351149830 | 0 | 23 | 0  | 0  |
| 137c42fcb8a68a45a7f25f52354c8649 | 0 | 23 | 0  | 0  |
| 98bf947951c317b626ec8a90bcdf0d2  | 0 | 23 | 0  | 0  |
| 3e8c95d32ffd32ee5f0dff7fce2c45f3 | 0 | 23 | 0  | 0  |
| e63d5bcf91fb7baefc8b4071c31e7181 | 0 | 0  | 0  | 23 |
| 8a763a212c9c5d790d2ad1c08de57dbb | 0 | 0  | 0  | 23 |
| 537f4f34bc93d5a361d864c0744f451d | 0 | 0  | 0  | 23 |
| ad39986bf64b4c53dd2433b7c52d3e02 | 0 | 0  | 0  | 23 |
| 27c2357d4962f66932d71cd9b310628e | 0 | 0  | 0  | 23 |
| 64cba2bba5508365ecd412dd9fbdc51c | 0 | 0  | 0  | 23 |
| bc6574355ee514549ce9d6ee28b57835 | 0 | 0  | 0  | 23 |
| 06c4527a501c27bca301305240fb5b60 | 0 | 0  | 0  | 23 |
| e314587239d42e0ea7f8d010efcc9ab2 | 0 | 0  | 0  | 23 |
| 778551c75d562a5d72963778de0d7c2a | 0 | 0  | 0  | 23 |
| 2aa716ef527679d3d17007258dc6b62a | 0 | 0  | 0  | 23 |
| 489b89b270ead6cfa815af7860b54784 | 0 | 0  | 0  | 23 |
| eeed17ca63167d051f309a67082eb025 | 0 | 0  | 9  | 14 |
| 8205cf636c390f2e61c333bc1382e1be | 0 | 0  | 0  | 23 |
| 08373729875b41a543b1ba19c81d1266 | 0 | 0  | 0  | 23 |
| aa8d20f08616b380e3d4bb820afc8d30 | 0 | 0  | 0  | 23 |
| e6c80f381849657e1dfada4b0597af4d | 0 | 0  | 5  | 18 |

|                                   |    |    |    |    |
|-----------------------------------|----|----|----|----|
| 825c7c376a6cf5af956e7de08cfd1725  | 0  | 0  | 0  | 23 |
| 110126e67e6b74168d35bf9cdd746795  | 0  | 0  | 0  | 23 |
| 1e56ee99db9a5d234d73e337e72f8d9d  | 0  | 0  | 0  | 23 |
| e913e1e07bd63fe160cd297bcf354612  | 0  | 0  | 0  | 23 |
| 8d226963d02421776c9b7a960d126660  | 0  | 0  | 8  | 15 |
| 1c48dfb7ef7b8ffcb03cbadaeed39e24  | 0  | 0  | 0  | 23 |
| 8ad0cf2f8643be134fa4482eabf0ac44  | 0  | 0  | 23 | 0  |
| b1f2a33172468c3287b3685fa2860b8c  | 0  | 0  | 23 | 0  |
| 7414cca045bf3b6831f85265a58a6785  | 0  | 0  | 23 | 0  |
| 8e759517926a81a20f4181b4e03fcd84  | 0  | 0  | 23 | 0  |
| 1fbaeee8df3389c4fce3b71f1305368a  | 0  | 0  | 23 | 0  |
| 5bb3592e9fd823e2c6c31717f51f6609  | 0  | 0  | 23 | 0  |
| 0ad62ea5861c8ac30beac0a93b978752  | 0  | 0  | 23 | 0  |
| 8b266c373ea8df3bfcfd2901a143e6a34 | 0  | 0  | 23 | 0  |
| 8da66f6e475b5726d318ff25bb326abd  | 0  | 0  | 23 | 0  |
| 9bb883ba590a9e6191bc1f2ce4eb5cec  | 0  | 0  | 23 | 0  |
| 396da0e5e0f26f73a5dab3b50b4f8904  | 3  | 11 | 3  | 5  |
| 64e5db5f4216116d0eceedfdb3d3beb   | 22 | 0  | 0  | 0  |
| e692fcf963c630541c141757c5eb197a  | 6  | 12 | 4  | 0  |
| 8a7134218461eb7ffe4b9d0f9b5ea438  | 11 | 0  | 0  | 11 |
| a696c92f924ce3de9dd074f4f9f4605d  | 22 | 0  | 0  | 0  |
| b205307072f62eb58bfe352e7c76b7de  | 2  | 4  | 12 | 4  |
| 45c5f3b79e3778cd2cad0b1fb155809c  | 7  | 15 | 0  | 0  |
| ba099e22a08db39c597e7d13eb7a6e5b  | 16 | 0  | 0  | 3  |
| e6005a7efab335632e279b97e6bf414d  | 7  | 10 | 3  | 2  |
| 641b37d664ea6d672f07eb47818654e8  | 11 | 0  | 0  | 0  |
| 413503022f4883996bb5c7e01933931f  | 13 | 0  | 0  | 9  |
| c15d268212253e2b5fce5229cf4ae8a7  | 9  | 0  | 0  | 9  |
| 72495075427f7d3287e0f4c829133811  | 22 | 0  | 0  | 0  |
| 3e49d2507b5cde89c553348ce5e01839  | 22 | 0  | 0  | 0  |
| 552a91e70d1ab6bcfd2d5d4259f133e3  | 3  | 2  | 6  | 8  |
| 09b56151935df53023f7ef4147462eb8  | 3  | 0  | 11 | 0  |
| ec5cca065fb241da2f3f1a8e78e44f4e  | 0  | 0  | 12 | 0  |
| 7553099979777e96e786d0c847f84a06  | 0  | 0  | 0  | 0  |
| 1ee6184a8598318643e5fc3c845ad4ad  | 0  | 0  | 5  | 6  |
| 20c246c71917bfff478bfcaac73e82a6c | 0  | 10 | 0  | 0  |
| 4d3b649bb5e5b28bb0b21511473d579c  | 0  | 0  | 0  | 0  |
| c6f38731fda5ed735d8f1951616a115b  | 0  | 0  | 0  | 0  |
| 90111243e8390188d0dcc03145f7b472  | 0  | 0  | 0  | 0  |
| 2fe397caf08e6c39fb3629a6a34d0562  | 0  | 0  | 0  | 0  |
| b896d1d9e326c881959ac7dbc7e3d05d  | 0  | 0  | 0  | 0  |
| 37ace4f8f4124f36f341e73019efcf    | 0  | 0  | 0  | 0  |
| e0f660b1e047d9d01ee8d55f49aad089  | 0  | 0  | 0  | 0  |
| 78b672e3e76fb4f3f6c182bfd4ee9f70  | 0  | 0  | 0  | 0  |

|                                   |   |    |    |    |
|-----------------------------------|---|----|----|----|
| 195bec6fe55eb023ffc71ce49fbf7730  | 0 | 0  | 0  | 0  |
| 74e4b183dece06565cc5dc28e5ef86b0  | 0 | 0  | 0  | 17 |
| 6183bbf45181a3c7a2adfc05c63deeab  | 0 | 0  | 0  | 0  |
| b8b3fbe0b5b1b2fa992763c64984f4b2  | 0 | 0  | 0  | 0  |
| 035f4480d5ef992a52343ddf3e276120  | 0 | 0  | 11 | 0  |
| 47a67e8ef3e77fec7e86881d7acd4f9   | 0 | 0  | 11 | 0  |
| 768c0085affd6eefb5a2ef5ebf0a1cd9  | 0 | 0  | 0  | 0  |
| afd3670788cf77bba6fce6f52d4c38b9  | 0 | 22 | 0  | 0  |
| 506909cab1f55e6c32f55ccecaa8ef66  | 0 | 9  | 0  | 13 |
| 5a9cce1018d6e3a7f81e67855a6dce67  | 0 | 7  | 0  | 15 |
| b4a54b6a0efd294725e1e73a7144149c  | 0 | 20 | 2  | 0  |
| a941fcf05bae73be0270927e29cb64e8  | 0 | 17 | 5  | 0  |
| 7544e6acae859d5445dfc95e7fb2ea44  | 0 | 9  | 4  | 9  |
| d92638b7f5f17e388d0c4f441cf7ab4e  | 0 | 22 | 0  | 0  |
| 41597720e9767d6f7b0d3badca4adb9e  | 0 | 22 | 0  | 0  |
| ed5114b88d94186aa61279daa44633df  | 0 | 22 | 0  | 0  |
| 16f7208d1818d6ba97054b7efaf1af17c | 0 | 10 | 12 | 0  |
| 073ebd42cd67185435cec0f710c8f304  | 0 | 22 | 0  | 0  |
| 7fb75df832e4b7b1eb06a512e7868b11  | 0 | 0  | 0  | 22 |
| 18ecdb603e924fac330e9b1f3db330b1  | 0 | 0  | 0  | 22 |
| 83e989b195895b3f849de10d7b6b89a9  | 0 | 0  | 0  | 22 |
| fff65a16719de62059a40988f13fba0c  | 0 | 0  | 0  | 22 |
| 7fcb9758840ac9d5242e11cbdd107ebf  | 0 | 0  | 0  | 22 |
| ff10f33c48cdce9ab7449b2ee9195d90  | 0 | 0  | 0  | 22 |
| 3e6005751020a30a214cfa58b280b3b5  | 0 | 0  | 0  | 22 |
| 5688d70d0ad2c0213db6d390a3f51b3d  | 0 | 0  | 0  | 22 |
| bb695da927b48c6c3e2c24b5261f54ae  | 0 | 0  | 0  | 22 |
| 5ee061c2077671c5e50ccb79080f3187  | 0 | 0  | 0  | 22 |
| dc8db2596582ce8953288a4361cc43d2  | 0 | 0  | 0  | 22 |
| 8a70c3d723f8263a43eb613ce4e36206  | 0 | 0  | 0  | 22 |
| bb841143d763d6d3bc664b2a101c74f4  | 0 | 0  | 9  | 13 |
| f7b68b607e308d36a191bfb3b058cf38  | 0 | 0  | 0  | 22 |
| ff0304b41ff8e27b080e90c06c575644  | 0 | 0  | 0  | 22 |
| 356b52de7ea9f011d36ef8c4f4c6574b  | 0 | 0  | 0  | 22 |
| 781a313d30a3bb5b56568e69a03f13ee  | 0 | 0  | 0  | 22 |
| a0b9d56e209df01e4dc14c9ce3c3ff6f  | 0 | 0  | 22 | 0  |
| c4894c4a0df46d2404464fcb555943dd  | 0 | 0  | 22 | 0  |
| b93bfff99568460f4351995bcf7de5cf0 | 0 | 0  | 22 | 0  |
| 3cef90038dd7f92117b83c7120abad92  | 0 | 0  | 22 | 0  |
| d67daf1a3fcb371e5accc9ca0fea3d95  | 0 | 0  | 22 | 0  |
| 8594de9a355a7275b18693da5d152ffb  | 0 | 0  | 22 | 0  |
| 5836afdd4e3fb83fc6e7851f5109ffb0  | 0 | 0  | 22 | 0  |
| 73522e92e1d06fe5e10dbd7d24112ef0  | 0 | 0  | 22 | 0  |
| 2c87f83cdbfc59b3fe7a30bc6f35c175  | 0 | 0  | 22 | 0  |

|                                  |    |    |    |   |
|----------------------------------|----|----|----|---|
| 9313c52698029a0836123ef6c35b1433 | 0  | 0  | 22 | 0 |
| eac59d14f0977f9ccb730e5bf131d98d | 0  | 0  | 22 | 0 |
| cc6e991e0b6807177f916af820ea0436 | 21 | 0  | 0  | 0 |
| 2681498861ee302761bb3c1ac7cd0437 | 12 | 6  | 0  | 3 |
| 7b17b23e33dd3b1a47a475909bc4f4   | 16 | 0  | 0  | 0 |
| 8640af5e23f252e99a27eba944f92afd | 15 | 0  | 6  | 0 |
| f193a2b17b760d61798f2804d9048618 | 7  | 0  | 14 | 0 |
| 55a08b82014f193040ad6d98af52b8d3 | 21 | 0  | 0  | 0 |
| 317546b20993a86166b0093ac929cd0e | 21 | 0  | 0  | 0 |
| a64de9a4fb1d3b96e5fa1500edd40cf6 | 21 | 0  | 0  | 0 |
| 58f6186aae96336617f21d49a7709a36 | 21 | 0  | 0  | 0 |
| a02c892d0d4756f587192cb1249f468d | 21 | 0  | 0  | 0 |
| 441c082c997728a5cff3e3b15c408014 | 21 | 0  | 0  | 0 |
| 375951e885ad03918b7313cdd87b22b8 | 21 | 0  | 0  | 0 |
| 1898168763c3cb92ed37afe75b71ef96 | 21 | 0  | 0  | 0 |
| 554bc8decef0f7fdf1d6e41406888747 | 10 | 5  | 4  | 2 |
| 0dbd64265d1f8be8e8943b11ff3b43d  | 6  | 0  | 0  | 0 |
| 2f61dd60c72d0b0d046be64e32871ea7 | 5  | 0  | 16 | 0 |
| 8685694c70bbc6bafa2c7b8039733c18 | 2  | 0  | 14 | 2 |
| c13ecf5991a6d4f1fdb013bc41d968df | 21 | 0  | 0  | 0 |
| 604e5ad4b595b2fd23e82debb8a45a54 | 10 | 11 | 0  | 0 |
| b820cffaf6cbd9fd9c66198788b17fc8 | 21 | 0  | 0  | 0 |
| 8d4326dfa0e7f4819c1747e7dd91e224 | 21 | 0  | 0  | 0 |
| 0f6522c541a7f9867e78c10177f8d06d | 21 | 0  | 0  | 0 |
| 9a94878779cbde7db236135e530b429f | 0  | 0  | 8  | 0 |
| f80859cebb4d6b10aed23a4a2647d2fc | 0  | 0  | 0  | 0 |
| c6b3cf6cd9664fd17629bc24d5f13378 | 0  | 0  | 0  | 0 |
| 74fdc148e0946860b0635671e21f8b61 | 0  | 0  | 0  | 0 |
| f8590aadd546ae2528aeec3d684c339  | 0  | 0  | 0  | 0 |
| 8473b46fc9f029b6120e853a51000915 | 0  | 0  | 0  | 0 |
| 9ce912f89a5c5aa4f9a5103732d68ee9 | 0  | 0  | 15 | 3 |
| 4a0de54cef9ee12f7082d2575291d830 | 0  | 0  | 0  | 0 |
| 2654c148204b8d934263ccc589ced9f8 | 0  | 0  | 0  | 0 |
| 649f019c268217283779814505506216 | 0  | 0  | 0  | 0 |
| f784d6f81f302ad91950b7b52fbd553b | 0  | 0  | 0  | 0 |
| 80fa082eff45f19e8ca43d3960d563d9 | 0  | 0  | 0  | 0 |
| b35ae4e293f84cb68e1c2b1cc1ab55de | 0  | 0  | 0  | 0 |
| 1ab35fc36284a74388b659c1551c05f4 | 0  | 15 | 0  | 0 |
| 912331b89a399384d7f4474d0f3fe556 | 0  | 0  | 0  | 0 |
| 4ba254ee0789698d9cb5c42537bdc53e | 0  | 0  | 0  | 0 |
| 345cbdb3d925a57d34a24f9fa2aae8a7 | 0  | 0  | 0  | 0 |
| 885e6dcfb5e98dbb9f0b8226c1d3b033 | 0  | 0  | 17 | 0 |
| 67b0c3b5cdac02453b47e490c6278c2d | 0  | 0  | 0  | 0 |
| ef9a816ef9502a7a5eca0c446c0eb584 | 0  | 21 | 0  | 0 |

|                                   |   |    |    |    |
|-----------------------------------|---|----|----|----|
| de1bf2dce15ca14b49ae7d5c8212e167  | 0 | 21 | 0  | 0  |
| 900b0ae435b783af555800df8648514d  | 0 | 13 | 0  | 8  |
| 614aed144d85c66536f5e86cce903cfd  | 0 | 21 | 0  | 0  |
| c5808e1401afb0cd5d5686e85b9da178  | 0 | 21 | 0  | 0  |
| 854a33617ad66c02004e63cf2b4b3e12  | 0 | 21 | 0  | 0  |
| b06457ee8f9a133a2ccd775d0a669a59  | 0 | 21 | 0  | 0  |
| 11921f7fc3b63f2bdc73b696bcbeca88  | 0 | 21 | 0  | 0  |
| aa7bc7943d0d95d66e3e4bf5a7fe9c99  | 0 | 21 | 0  | 0  |
| e951fcce51f3320938e1dcf4aba325c0  | 0 | 14 | 7  | 0  |
| e355660bade3a43b1ae6f215fba0eedb  | 0 | 0  | 0  | 21 |
| ba79c9331e0e7f6adeee12d839b3fef0  | 0 | 0  | 0  | 21 |
| 0a53574770b20bd6718f985397ceee25  | 0 | 0  | 0  | 21 |
| a7a299db0f235f9dd5ac184ee1a3c9ae  | 0 | 0  | 0  | 21 |
| dde235504f998e021d190e07aa927a56  | 0 | 0  | 0  | 21 |
| 7f35cfd9435de758a7214c1eb1de5fab  | 0 | 0  | 0  | 21 |
| 8bbbed6408e5ff7b69c6487581391ac7c | 0 | 0  | 0  | 21 |
| 50f52ea3ef2d0924f3e04db89370bd57  | 0 | 0  | 0  | 21 |
| 6593c709044eed267a3b3566da8228bc  | 0 | 0  | 0  | 21 |
| 0609e089751869a4b8f84214b4dcfaed  | 0 | 0  | 0  | 21 |
| b0d206db05203050327c65149c084080  | 0 | 0  | 0  | 21 |
| 09c2e5a4249fd0e5c1f8f17deb59fdae  | 0 | 0  | 0  | 21 |
| 2c67e437a58b35d12a1ea11dd562683c  | 0 | 0  | 0  | 21 |
| 2001ab867b1f21a2b0844f156cd18be9  | 0 | 0  | 0  | 21 |
| 00de6b06beeb884eaba9563b334dc1974 | 0 | 0  | 0  | 21 |
| 053f0d2c7c6d3dd41b0f9853c1e23891  | 0 | 0  | 0  | 21 |
| 6493830171fd3a8654309ef26d8f659f  | 0 | 0  | 0  | 21 |
| 692404cf6bb2a67e0ca9d69e295721f9  | 0 | 0  | 4  | 17 |
| 5ac4a18c8555ee70ca632c326de1f646  | 0 | 0  | 0  | 21 |
| 2b72e377fac3091385b2ca662eae8489  | 0 | 0  | 0  | 21 |
| dd73905fbf73b8a991559b18cc9b4239  | 0 | 0  | 0  | 21 |
| 6383afc74ca7dcebc66bf9936b370a13  | 0 | 0  | 0  | 21 |
| 3f7dd8e74a896ba5fed0583b94b527cc  | 0 | 0  | 6  | 15 |
| 78a7583a660ebc0799a2f35825a0db27  | 0 | 0  | 0  | 21 |
| 3cb9e666f2ad5e46c2d414a15cb8262c  | 0 | 0  | 0  | 21 |
| 65ac51910c1e36b67f796b87cf88d505  | 0 | 0  | 0  | 21 |
| c421852fd58b9b619a38f355cc83edfa  | 0 | 0  | 0  | 21 |
| 25cef9a8a04cd8742ccb6cf5bce790    | 0 | 0  | 0  | 21 |
| 8b3664677d37983e8d1a6878d4c89c62  | 0 | 0  | 0  | 21 |
| f0a08aa21e792ab2e6bc0475dd7c27f9  | 0 | 0  | 0  | 21 |
| ad78083c1fe1c2a3f970a705d00b6df9  | 0 | 0  | 15 | 6  |
| a11d30c44a127b55cf06e216e063d3fe  | 0 | 0  | 0  | 21 |
| 5ae513146490a07acc4e972932c36ffc  | 0 | 0  | 0  | 21 |
| 98420cca7f4eacf86c3f85856429952e  | 0 | 0  | 21 | 0  |
| 3679e32b27fbd5e27a41f630a7b0a783  | 0 | 0  | 21 | 0  |

|                                   |    |    |    |   |
|-----------------------------------|----|----|----|---|
| 44286731c56adda0e581b9379f356e61  | 0  | 0  | 21 | 0 |
| 659154ace16eb35a6d5a601fcbddaac5  | 0  | 0  | 21 | 0 |
| 85915c10b10af1eb48209bc85fc2d3a3  | 0  | 0  | 21 | 0 |
| 4e71889f1f1502b2494d20d0548634a0  | 0  | 0  | 21 | 0 |
| 327539b48033680ab4e0631b82897784  | 0  | 0  | 21 | 0 |
| f9db8aa44ffbad1d6129faf732dea0ae  | 0  | 0  | 21 | 0 |
| 0610730d2c8efef5b7a8d460424a4b09  | 0  | 0  | 21 | 0 |
| b884065ef5c5ffeefe7c983dec622efd  | 0  | 0  | 21 | 0 |
| 2f274da1a87fce4aa3ab4010767de9c7  | 0  | 0  | 21 | 0 |
| be48612714a616e894476c4fb9b1346d  | 0  | 0  | 21 | 0 |
| 8ccc50718445aee30be01abf106289bf  | 0  | 0  | 21 | 0 |
| d1c7ca7651905e7f6c05146004ce75b0  | 0  | 0  | 21 | 0 |
| 027cb87756cdf4b9cd8f000e8c8fa0f9  | 0  | 0  | 21 | 0 |
| fce921c1e66a106e323c8e62e7ab1193  | 0  | 0  | 21 | 0 |
| 445dfffb90ca770a460f368f6d0b85355 | 0  | 0  | 21 | 0 |
| fdd478ff44da5a208581143552e167ad  | 0  | 0  | 21 | 0 |
| d031b2f5b8f25cc33216107863912aed  | 0  | 0  | 21 | 0 |
| 2ea83b40e493e23792497169dba88b4b  | 8  | 0  | 0  | 0 |
| a0d5bbf8a0d5d67871f56678215b2a1c  | 11 | 0  | 0  | 0 |
| a27649996fccdebd66854317f5a3434e  | 20 | 0  | 0  | 0 |
| a0262d9ddd146b55cb1be95dd9ec2afd  | 20 | 0  | 0  | 0 |
| d399a1501029defdd40fddd7340b2e15  | 20 | 0  | 0  | 0 |
| c410ca7457e0a3cc1efbc5f9b8286d6d  | 20 | 0  | 0  | 0 |
| 22632c954ef155ebb0c3d54d46fac742  | 8  | 6  | 3  | 0 |
| 0e69b946401f4321670bb8e569e27837  | 8  | 0  | 12 | 0 |
| fde185795dda89b1a548f02fa9cf83d6  | 4  | 16 | 0  | 0 |
| b1b1a1e623ed44c6a59da65b7aba9f85  | 11 | 3  | 0  | 0 |
| 29fa859c91ffcee31d90f4df06de8653  | 20 | 0  | 0  | 0 |
| beab81c220d0cea8fa23848c781cf460  | 4  | 11 | 5  | 0 |
| 9d6f169076f23399dbf6f79f250fdd7f  | 4  | 0  | 0  | 0 |
| 2f88facb93dbde93970cb4b359bd0b2f  | 12 | 3  | 0  | 5 |
| 1cb7aab5bb5e87f1ce89c074cc1085ca  | 6  | 0  | 0  | 7 |
| bb1ab5f16fffdce107742d89dc9d6e55  | 10 | 10 | 0  | 0 |
| 36b0d6df5bc142b919d56d6abfc35c99  | 17 | 0  | 0  | 0 |
| e7353351104da1494f63c8572f96ac1a  | 20 | 0  | 0  | 0 |
| 1bc8ee158e97420c7c6ed74df5eebf6a  | 5  | 0  | 15 | 0 |
| 77c5609c988647a3b3454737e79586c9  | 20 | 0  | 0  | 0 |
| dbe37b07d7fcc8a8045011e9b419e111  | 20 | 0  | 0  | 0 |
| 0ce2b07a62c03118b30b23b6268fd471  | 20 | 0  | 0  | 0 |
| 862e9bbb67981f9eb9691937836e9847  | 0  | 0  | 0  | 0 |
| 5b7cdd29369f2b8c4c7b677751bb4333  | 0  | 0  | 0  | 0 |
| 808db1c8d2abab41865cc4c345d1de2b  | 0  | 0  | 0  | 0 |
| 1f81f9d2061057ecc701f09687b1afa2  | 0  | 0  | 12 | 0 |
| 3ec1f93c020b308648b9fa4a61e2758d  | 0  | 0  | 0  | 0 |



|                                   |   |    |    |    |
|-----------------------------------|---|----|----|----|
| 59a6ea6502bcbdeb388c54c5e6bb8d22  | 0 | 0  | 2  | 3  |
| a4d7011195ada48301f39e17ecd5d5c8  | 0 | 0  | 0  | 0  |
| e0750a721554942c73632b3a3fc5b5ee  | 0 | 0  | 7  | 0  |
| 1405e7232d4b8f79628e0fffed3cfd4d  | 0 | 0  | 0  | 0  |
| d6905c956f81a0e6e1491661367ab3ce  | 0 | 0  | 0  | 0  |
| 9b37df04070fd1d67a736d457f2a239a  | 0 | 0  | 17 | 0  |
| 5165b5b1f69160a2ba0cb8895e842f6f  | 0 | 0  | 0  | 10 |
| 96566a1415e282c125d534c9848fe0b9  | 0 | 0  | 0  | 0  |
| d560b02d3a924623f4de04c10c1435bd  | 0 | 0  | 0  | 2  |
| 2ecb382e7a2eca1b715c97605a2e2ce5  | 0 | 0  | 0  | 0  |
| e7f5a9795aa92e3824ac7588a16e7ed4  | 0 | 0  | 0  | 0  |
| bdaf361c1df5edaf1205d20bc593b0f8  | 0 | 0  | 0  | 0  |
| 5fd26320d784aa322f1e827cfcb62906  | 0 | 0  | 0  | 0  |
| 3fe77823f4ca28da4ecfaddc178216bf  | 0 | 0  | 0  | 0  |
| c2f2afed185d0a599fe76fc322799f77  | 0 | 0  | 0  | 0  |
| 9d00d76ee0db3635fb4578725c68acc7  | 0 | 0  | 9  | 0  |
| e028145b95519af2f7dba90d3a4e7072  | 0 | 20 | 0  | 0  |
| 4fda623d1b2bc43a05e26c560d978e8d  | 0 | 20 | 0  | 0  |
| 5edb616c96c46cea4506f856f833c4ac  | 0 | 10 | 0  | 10 |
| ef5f08962dd6a4f3d7d05712c0d55dc4  | 0 | 3  | 0  | 17 |
| 7f942a034c5cf616774860a17512a6b8  | 0 | 20 | 0  | 0  |
| 21364c86d9dc2694a5c443eb71be2d6e  | 0 | 20 | 0  | 0  |
| b54eacee31661dad0f819aee739a29ce  | 0 | 20 | 0  | 0  |
| 42bbe50a714f5fc74e4d0d138fd4452a  | 0 | 12 | 8  | 0  |
| 52af5cb28f1ac5b09d667853118b3e3b  | 0 | 7  | 13 | 0  |
| 598e6fb92062621acf6e6b95743b4adf  | 0 | 20 | 0  | 0  |
| fbdb783be659171f41321578b43978df2 | 0 | 20 | 0  | 0  |
| 7902966d8a5ff7cf44af50070d8b028d  | 0 | 20 | 0  | 0  |
| eaf58fd51c633a1ec4e6d234f991d683  | 0 | 20 | 0  | 0  |
| f7574bc8a839d9746f17abbccac815ba  | 0 | 2  | 2  | 16 |
| daaa94e2ca3547c6aa9fee0efd1b382b  | 0 | 0  | 0  | 20 |
| ddcdfdf93ecc7b1d8fed6211d0272c60d | 0 | 0  | 0  | 20 |
| 5be7566748659066b42e87a236c425f8  | 0 | 0  | 6  | 14 |
| c81e8ba948ec77688060a285e5e95751  | 0 | 0  | 5  | 15 |
| e757cf3d061d3b0c2309a7f6b7398d13  | 0 | 0  | 0  | 20 |
| ade9f55118800250328d863304e0912d  | 0 | 0  | 0  | 20 |
| 87cb3637bb4ed46889e764aa8951ddc2  | 0 | 0  | 0  | 20 |
| 661731b47c688a0e22d5184681a95e67  | 0 | 0  | 0  | 20 |
| b240368e6dd302ed8703c7163b76ce30  | 0 | 0  | 0  | 20 |
| e2fffc074dae9be5eac931149c263612  | 0 | 0  | 0  | 20 |
| 86f067080e51d8ac287a1ef4a522f29b  | 0 | 0  | 0  | 20 |
| 2fed2a1026e66ae0b7daac01356f912c  | 0 | 0  | 0  | 20 |
| c2f967c469c73de12f91e6775311c6d5  | 0 | 0  | 0  | 20 |
| fe1a77b42d98beacc5075ac8a6033089  | 0 | 0  | 8  | 12 |

|                                  |    |    |    |    |
|----------------------------------|----|----|----|----|
| 30b99f8a438294b71054c722d50fad78 | 0  | 0  | 0  | 20 |
| 996990e8847c6166ee77f8f41dc08c40 | 0  | 0  | 0  | 20 |
| 3f832b04c08e8551fa20ad5cf53137ff | 0  | 0  | 0  | 20 |
| 9dbff7a5ef675658075532bd96a87f84 | 0  | 0  | 0  | 20 |
| 6b32e7203efd7131ecd6b96efe39c6e7 | 0  | 0  | 0  | 20 |
| 1b41758d93a2f66df07c85b98248cfb2 | 0  | 0  | 0  | 20 |
| dadc792cbd3e13fc3e30ed53b30db79d | 0  | 0  | 10 | 10 |
| bbb676397325f7649e27f20d4e5ae247 | 0  | 0  | 0  | 20 |
| ca91a3b2fbaeacefb9bb0313bdc8a16e | 0  | 0  | 0  | 20 |
| 20f502933606f0fc385b3da11038c6c9 | 0  | 0  | 0  | 20 |
| f07343f8a8a849b86ed6f7d6349c918f | 0  | 0  | 0  | 20 |
| e73dba03a78113c42f911514d07e3f09 | 0  | 0  | 0  | 20 |
| 370120cf87e8e7074f73d9a48dd2d188 | 0  | 0  | 0  | 20 |
| ade4cd06395dd63ba0f01014f4a58d5c | 0  | 0  | 20 | 0  |
| 453684eac97e9dde9eec854b08499481 | 0  | 0  | 20 | 0  |
| 300fe0ca917c00a464da21214b0a68ef | 0  | 0  | 20 | 0  |
| 0ea49eadde16b9bba7c7793f0a491710 | 0  | 0  | 20 | 0  |
| 8638c75d3b20181274ae649c6fc90dfa | 0  | 0  | 20 | 0  |
| 72ca640a09d03316319ded06be23aaf7 | 0  | 0  | 20 | 0  |
| b7a9bf7a2938b9a674a213ef021ebe0e | 0  | 0  | 20 | 0  |
| 9a16b1559ad6d0e8f9509f8564fff23f | 0  | 0  | 20 | 0  |
| 781e1589a4740ec589bd387805b37743 | 0  | 0  | 20 | 0  |
| 158cca4259ec4f06d0663339b7049ac4 | 0  | 0  | 20 | 0  |
| 9c8d0127f7132ed385bb7309f5456666 | 0  | 0  | 20 | 0  |
| c929b6b5f9c098409752c0cfd6342f1f | 0  | 0  | 20 | 0  |
| 0e746effb541f5124445820a569fb4bf | 0  | 0  | 20 | 0  |
| a0537b96af922db253068830a9befe9b | 19 | 0  | 0  | 0  |
| 14d3fcc8d9a1f10776c60c8e7b3afe1b | 19 | 0  | 0  | 0  |
| f9c2fdc5bd03549330213153427515bb | 19 | 0  | 0  | 0  |
| bbc9d3b3b4ee8cdd2bd01482aa2fda43 | 19 | 0  | 0  | 0  |
| 537e6ee0091268fd2fb447c51c4c285f | 5  | 0  | 10 | 0  |
| 1cac05b218dc9ea2946ddf8257767e1d | 19 | 0  | 0  | 0  |
| 627231232a6fcdbe6fb74e45119efd3a | 19 | 0  | 0  | 0  |
| 633680426bedc0022e9e5c30a1b5e71b | 10 | 9  | 0  | 0  |
| 08e5de88fa2eea24cba656753ebd80ba | 19 | 0  | 0  | 0  |
| 6af2db0becb605d0b2462a10929773c4 | 19 | 0  | 0  | 0  |
| 219de8da64ef785e541cf328a16c652c | 9  | 10 | 0  | 0  |
| c5d1a41d860501cd1c5293785a3b71dd | 13 | 0  | 6  | 0  |
| acbb161fe74b2e0f774ca5b4591c400c | 19 | 0  | 0  | 0  |
| 32ba8883046fcc87f76e2d20f12a751d | 9  | 0  | 0  | 10 |
| 7f6b0641177ea0837f6b69867eba59a7 | 12 | 3  | 0  | 0  |
| 864f2f3563cbd4bc67633b05e5f1428e | 19 | 0  | 0  | 0  |
| a4669d771e654c275c8504b5a624fbb3 | 19 | 0  | 0  | 0  |
| 8815bb300e4cda8786a49316b140b117 | 19 | 0  | 0  | 0  |

|                                  |    |    |    |    |
|----------------------------------|----|----|----|----|
| f5e2c307f7b83d171a401d6513034146 | 7  | 12 | 0  | 0  |
| fac02c52105268e00bf0669198e3b197 | 5  | 8  | 6  | 0  |
| d2175f7d86143d16cbb56039ac9d2703 | 19 | 0  | 0  | 0  |
| 1d5e07caa4dd3ea0887389cc55b0ba79 | 19 | 0  | 0  | 0  |
| 161a40f7784c5193c446291ffc0be41c | 4  | 0  | 0  | 0  |
| 1d820bfed9483aa5f97072fec5aeea6a | 19 | 0  | 0  | 0  |
| ed71f3f894be6a168adf50eef10e35d8 | 6  | 4  | 6  | 0  |
| 997c71d37f56d36758b11f29b706796e | 2  | 0  | 17 | 0  |
| a536edeeb0447c6ce77890cece585cd5 | 3  | 12 | 2  | 2  |
| 346cf1612ce0067a6fda86af7c218a72 | 19 | 0  | 0  | 0  |
| 5307fc78a64cb22c8fb8fee685d47633 | 0  | 0  | 0  | 0  |
| 2f54b2f8855d6bd8575a896972c9366a | 0  | 13 | 0  | 0  |
| f01b513913b70ff63b23b9237eea617b | 0  | 0  | 0  | 0  |
| 8226df7e758e4cf84e19997c34dac857 | 0  | 0  | 4  | 8  |
| 5dd91ecfbd8237e4b143cc819c00035b | 0  | 0  | 0  | 0  |
| 955a07454f4675b1b5492737d1a5a585 | 0  | 0  | 0  | 0  |
| 2f3ab223776af4de77e2fc40b6a93d91 | 0  | 0  | 0  | 0  |
| f38d402a8c090e6398c5e5aa64a09d28 | 0  | 0  | 0  | 0  |
| 95aa0e55035e3205473d4cf26d99b82a | 0  | 0  | 0  | 0  |
| 44c7f3537270b834a40cc513018d130a | 0  | 11 | 0  | 0  |
| e6a1224a7ccd7b32e63c5af23d91a4c6 | 0  | 6  | 0  | 0  |
| 2679fb0c44ba1bfc9fd1ff13321eacd7 | 0  | 0  | 0  | 0  |
| 998cbb018f2e89b51ad238aa41174f5a | 0  | 5  | 0  | 0  |
| 2b46a40a184d118560698af087e91674 | 0  | 0  | 0  | 0  |
| d0e34bdc6db67cf96b34a7cf7f9c4647 | 0  | 0  | 0  | 0  |
| 902fce45198b17ac2c016127f8372f02 | 0  | 0  | 0  | 0  |
| ba22d7ca22cca7b56d6add020f69e2b8 | 0  | 0  | 16 | 0  |
| b9fc4646a19108dbe7e8e13ea27121f5 | 0  | 13 | 0  | 0  |
| 688380ea95735e75d0c8b12f64f8541a | 0  | 0  | 0  | 8  |
| 75749b6739e1c40a035876abf270236e | 0  | 0  | 0  | 13 |
| 888cda1111653a9755ffd467b43dd6bd | 0  | 0  | 0  | 14 |
| 4caf197cc053f4de4c2106d8a24580ae | 0  | 0  | 0  | 0  |
| 036e650d17eaec0f7aa6b4f09eacadad | 0  | 19 | 0  | 0  |
| 907b7838f8f85ea51c7453da0a70fef6 | 0  | 5  | 4  | 10 |
| 7cae88c33ef8cc4ab7a960bdda3eb904 | 0  | 19 | 0  | 0  |
| 82a68306c240d91dcd69cfc9493963b0 | 0  | 19 | 0  | 0  |
| 6de39158b77ed17bd68e084f386d6311 | 0  | 19 | 0  | 0  |
| dacdc57ce3aedcda09271ac3568235a8 | 0  | 19 | 0  | 0  |
| 59fb6d04c226edf3c7466c032501010d | 0  | 19 | 0  | 0  |
| 6b2f7c3a0ac608d81076994d37ce57ba | 0  | 19 | 0  | 0  |
| 0ba8effd02057d171ba25c9149cb9635 | 0  | 11 | 8  | 0  |
| eb51bf5197b3681b331ff51379bb8ab8 | 0  | 6  | 0  | 13 |
| d2c0e01f868c75ac077d35b806d5a350 | 0  | 19 | 0  | 0  |
| da1b5abf4fae043782131af13991bed9 | 0  | 19 | 0  | 0  |

|                                  |    |   |    |    |
|----------------------------------|----|---|----|----|
| 26bad39a2cac874671ca962b9c9f12cf | 0  | 4 | 15 | 0  |
| 4dcd8608e4d0eb13a7242de8891a5afd | 0  | 0 | 0  | 19 |
| 1da35adace664a6580a4dea397268ff6 | 0  | 0 | 0  | 19 |
| 8afea26b48f8bf30795cd46968ecbc9e | 0  | 0 | 0  | 19 |
| a6784581badb6b437fb5b50f7fa3ffbf | 0  | 0 | 0  | 19 |
| 556fe1c656c2093ecc4f6d5ce634fb8e | 0  | 0 | 0  | 19 |
| 72cdd7e50d44dba9600f1917c99c466c | 0  | 0 | 0  | 19 |
| 71bce12bf063bf2d41535e1f33507218 | 0  | 0 | 0  | 19 |
| bf4d6ba10b6d16dd91a9737306224280 | 0  | 0 | 0  | 19 |
| 15b5ca846046496a6b370a2c8337bc2f | 0  | 0 | 0  | 19 |
| cc7ebfa29afe367592983bd3dc38b3e6 | 0  | 0 | 0  | 19 |
| ae23d8a8ba23982d00917065c0ef7b2c | 0  | 0 | 0  | 19 |
| cc6180c50cb7547160d915b5a2cc8250 | 0  | 0 | 12 | 7  |
| 78033ffbeaa333d630a376df721a9a72 | 0  | 0 | 0  | 19 |
| a1ef53349c86b7db3587f95552fd90b0 | 0  | 0 | 0  | 19 |
| 99ff3450c0f392f6af1329253ff5e48d | 0  | 0 | 0  | 19 |
| 2cb32c5db446f6a02e9f3d0a4aa88572 | 0  | 0 | 0  | 19 |
| 2056791decdc8ef01e771727a6c45808 | 0  | 0 | 0  | 19 |
| 0ed58e43b3350b712bf33942a5e82c3e | 0  | 0 | 0  | 19 |
| 6f41b3a48de0a146dc8888d710377f32 | 0  | 0 | 0  | 19 |
| a830947f7064bf1ba14177063d0c9ca5 | 0  | 0 | 0  | 19 |
| 29f3b744327ec6db33dd408d7db8c5c8 | 0  | 0 | 16 | 3  |
| 2bba725f55d0c19f2c84fa8ded6f85d9 | 0  | 0 | 0  | 19 |
| 337a71067e8108c99ababe99b6c1b1e8 | 0  | 0 | 0  | 19 |
| 7e78372af6db3ec80ea726650242d43f | 0  | 0 | 0  | 19 |
| 19ebd3ce2075fb2c0d37a57b55730253 | 0  | 0 | 19 | 0  |
| cc62a69dd6bee9e996d77db2c737ae64 | 0  | 0 | 19 | 0  |
| 5212cf2b2f19ae6bef0993043da60715 | 0  | 0 | 19 | 0  |
| 218d3f1f4af57dbf2f3082f224417100 | 0  | 0 | 19 | 0  |
| 015acd2867ad2e32e8e9863658c48c86 | 0  | 0 | 19 | 0  |
| eac62b55c2c393c822fdbf17e8a2be0e | 0  | 0 | 19 | 0  |
| faad5145c6584f4e6a12e9b1bd2ac6ff | 0  | 0 | 19 | 0  |
| 43915d030fb57f706d9abf19c3f4e023 | 0  | 0 | 19 | 0  |
| 760cc1b976e46a1553501e00652f95d3 | 0  | 0 | 19 | 0  |
| 1f2fefc69225049d58cb8ca58f61ef4e | 0  | 0 | 19 | 0  |
| f67ac5073f76576f87b88af41c35c0b2 | 0  | 0 | 19 | 0  |
| 25730339fd7b63008e31e3a695df33aa | 0  | 0 | 19 | 0  |
| 1da1bdf53cb54a8adc82b963b5c68c59 | 0  | 0 | 19 | 0  |
| 15ea454fc3aad67b9d89b6f9086fc2bd | 0  | 0 | 19 | 0  |
| 5438744714fb14206415b1c17ae810ed | 0  | 0 | 19 | 0  |
| b160bdc9eeadfb9a1601989ef548321d | 0  | 0 | 19 | 0  |
| f8228a16a7705e3c9d9a8a610eec2fdc | 0  | 0 | 19 | 0  |
| 6de41fba7784527684f4b3bdc5381410 | 18 | 0 | 0  | 0  |
| 17b4fb513514f7acf2fcc5813527b90b | 5  | 0 | 0  | 13 |

|                                   |    |    |   |    |
|-----------------------------------|----|----|---|----|
| 6117b9f0ef4bcaf95ffc5d8fbf8d3b18  | 18 | 0  | 0 | 0  |
| c62b33f026f9124e5a95277a74224c76  | 18 | 0  | 0 | 0  |
| 506a0228b3e06982a7eccd1f368cfd90  | 4  | 0  | 0 | 0  |
| 7bb168ca945f716be923ff286fe2e6e3  | 15 | 3  | 0 | 0  |
| 3c8fc0e435c7abdb53adbe51f76342f5  | 13 | 5  | 0 | 0  |
| 4d4b80a4bdbf9d667df0d4019df4bd74  | 3  | 15 | 0 | 0  |
| 228a1d521434750200726454ba975e9d  | 18 | 0  | 0 | 0  |
| 85acddce07f1538d93b2f5d5d7631246  | 18 | 0  | 0 | 0  |
| 3176bdbb073fa98ebe5d318e362757a6  | 13 | 3  | 0 | 0  |
| 5f91afbcbcb124c2427fecac4f146e685 | 4  | 14 | 0 | 0  |
| faa142b1f9be6d242d7a240436be8f5f  | 18 | 0  | 0 | 0  |
| bb20af7c49696cc73af15a609de87769  | 18 | 0  | 0 | 0  |
| 08c167f535d761129946e34d34d3ade5  | 4  | 0  | 9 | 5  |
| 0f6ebf90291f8730ac49c55cdb0a95b8  | 18 | 0  | 0 | 0  |
| 2810cfd1475e8a7280e6fd8ddeebd3f   | 18 | 0  | 0 | 0  |
| 7893d65940299314c2e070a4c37cc97f  | 18 | 0  | 0 | 0  |
| 44a0d8b3d0061650161fed36afc7c6b3  | 5  | 13 | 0 | 0  |
| 1f997592bc029bc3fc3fd9267eafe296  | 2  | 11 | 0 | 5  |
| ddb601255172facaf6c54e6c349620f3  | 18 | 0  | 0 | 0  |
| 6ca729192171ad2b7d461239ffb7854d  | 18 | 0  | 0 | 0  |
| 4c13685f0aab13675b07eda3e79defc6  | 8  | 0  | 0 | 0  |
| 7f94ae598602f51960a5ff26953dd1b3  | 18 | 0  | 0 | 0  |
| a967266d188e4f25fb6aa46d87e41643  | 18 | 0  | 0 | 0  |
| 636d1ee3b9bbc958a202e85788b7d123  | 10 | 8  | 0 | 0  |
| 4474e9ca7d179398bb1f307ec1000810  | 18 | 0  | 0 | 0  |
| dae04e6cfb1a11ae9e4a17f416d67a01  | 7  | 9  | 2 | 0  |
| 00776dedc3a8811868b4d96feb1dae7d  | 8  | 0  | 0 | 10 |
| ebd11e4885aa3fa40c3f598a1ababbc9  | 18 | 0  | 0 | 0  |
| fdb578ec7b5aad1c73f66ebe6be545fa  | 18 | 0  | 0 | 0  |
| 36e1265727c5747b7d23ba77e5efe93d  | 9  | 0  | 5 | 4  |
| 462c7282aa03dfb3a202534f9f5ded63  | 0  | 0  | 0 | 0  |
| 6ca7744e3c33887c4ea519cffb07fc6d  | 0  | 0  | 0 | 0  |
| fc7bdb664473c2e9778f5b48332a7e7f  | 0  | 0  | 0 | 0  |
| 1c958fdd7bec8ff3b51acef2decfadf7  | 0  | 0  | 0 | 0  |
| 2021ce84b39362fc346d3a394128d68f  | 0  | 0  | 0 | 0  |
| b48bd20ea0baccf8e0ed458dbcea685e  | 0  | 0  | 0 | 0  |
| a988a6a57b9bfc17039a9d02ac9f0f9d  | 0  | 0  | 0 | 0  |
| 004ed363f616d2cebfe4b6bd41bccf8   | 0  | 0  | 0 | 0  |
| f27793613283a99fdeb2ef11db95462a  | 0  | 15 | 0 | 0  |
| 9fe4808100f82c18910cc810447a72af  | 0  | 0  | 0 | 0  |
| a7bbde2c0f1021d78ad9b0495cbbe845  | 0  | 0  | 0 | 0  |
| 25a705aff6931be4713ad609386978c6  | 0  | 0  | 0 | 0  |
| 40fc0b071fff92058598d54138b56e244 | 0  | 0  | 0 | 0  |
| 4e86009e03e1c20da4b24bc5b66523c1  | 0  | 0  | 0 | 0  |

|                                  |   |    |    |    |
|----------------------------------|---|----|----|----|
| 2f342733f2fd1e4885413a54c3caa947 | 0 | 0  | 0  | 0  |
| 141721dba8e9fc594ae03c46a808c42a | 0 | 0  | 0  | 0  |
| 7108b5b385f90fdd072e1854fd8a660a | 0 | 0  | 0  | 0  |
| 20c6084622475fad0b320f09a665d00  | 0 | 0  | 10 | 0  |
| 6c0b780d84ebee0011e7a0a2a9fac71  | 0 | 0  | 0  | 0  |
| 568a6ddf10f14e5f05be41aaaacce9a6 | 0 | 0  | 0  | 13 |
| d2b23a9e1931ed85efbdbdad6caf472  | 0 | 0  | 6  | 10 |
| 9cbaad6269fa98b19346b9c80d979ee1 | 0 | 0  | 0  | 0  |
| cb9e174a39363feef01046ba9a897660 | 0 | 18 | 0  | 0  |
| 64bc4c08c99a13b5e322d3f738b50af4 | 0 | 7  | 11 | 0  |
| f60a5cc9e766f9e0c7f97523440b6442 | 0 | 18 | 0  | 0  |
| 38ab4c901d07cd86b770edad5f010060 | 0 | 18 | 0  | 0  |
| 52f07be35e7075114848100d686fa889 | 0 | 14 | 4  | 0  |
| 2cac9319f87814edd2dba7b981aeb1d9 | 0 | 18 | 0  | 0  |
| e08f77b55c1c298b850d40608a036c66 | 0 | 10 | 0  | 8  |
| 9c0422e204e64b048886554cbda9a392 | 0 | 18 | 0  | 0  |
| 9d20d9117383c6191bc47ae001d75626 | 0 | 18 | 0  | 0  |
| 7ba5301da93af792d51da4c5966bf683 | 0 | 18 | 0  | 0  |
| c99df4d7eaae06a2114b00430efc82d4 | 0 | 18 | 0  | 0  |
| 8bb014f12d8d3ed73e01e191f731aec9 | 0 | 18 | 0  | 0  |
| f27b895ec1be99e9d3a8078f90434112 | 0 | 18 | 0  | 0  |
| 0fb25588e6fdca01960135905bda2447 | 0 | 18 | 0  | 0  |
| db768e53d12a84b1ffaf52876a139929 | 0 | 2  | 0  | 16 |
| 43155f7e02d32b93d06dc3e723e821fa | 0 | 4  | 0  | 14 |
| a98186b56842c62d67903e0f2773023e | 0 | 5  | 13 | 0  |
| ce0afa6595009f6a1a1189775b4feb9b | 0 | 18 | 0  | 0  |
| fd06e85b2775b983e9b0971e6e7fa439 | 0 | 0  | 0  | 18 |
| aa1e008fe49feb4123e96498b545847b | 0 | 0  | 0  | 18 |
| 1ae03ab929b652314cdc29678ebe96f6 | 0 | 0  | 0  | 18 |
| 342b1e575727bc82dd790464c31fe4f8 | 0 | 0  | 0  | 18 |
| c2205d38e78238d486ddf79545f51f33 | 0 | 0  | 0  | 18 |
| 37229ad541f7d74877875ef449ce8fad | 0 | 0  | 0  | 18 |
| b470cc5027dfbef38ac8da23bdb7f864 | 0 | 0  | 11 | 7  |
| 2295fe128af54715a1d318eaa4558a7c | 0 | 0  | 0  | 18 |
| a92d5a6517a831b96802435686e51991 | 0 | 0  | 0  | 18 |
| 7c505410f142367885862e32aa4470bc | 0 | 0  | 0  | 18 |
| b2cfb920b83fe296c23e9acb97500fc3 | 0 | 0  | 0  | 18 |
| a5f320b6e4ef5aa1f513d98097a352d2 | 0 | 0  | 0  | 18 |
| 78967d9a0d84726e3a479150374a7b2d | 0 | 0  | 0  | 18 |
| 019fbacc38330c9d8f9a2f4f17b0740c | 0 | 0  | 0  | 18 |
| 98275e845da814eddd63942984ad2df9 | 0 | 0  | 0  | 18 |
| 379e405459ad4e14fef8eb967301672b | 0 | 0  | 0  | 18 |
| 7ceeb1bdab8bce95155d6e6f5c7feb6a | 0 | 0  | 0  | 18 |
| 79190457c94d1b368a8980da537613b7 | 0 | 0  | 0  | 18 |

|                                   |    |   |    |    |
|-----------------------------------|----|---|----|----|
| 19efd99e51d36dd9a1f1be7d02b87f0c  | 0  | 0 | 0  | 18 |
| 61c669cbae6c04b42836ae759339b2a5  | 0  | 0 | 3  | 15 |
| 5835f5cb06434f198d559deca44c66ab  | 0  | 0 | 0  | 18 |
| 52efadbcbdb4b393607f3156944983357 | 0  | 0 | 0  | 18 |
| 588dcbf4439c6d975ce0bf7f8644f55c  | 0  | 0 | 0  | 18 |
| d378fb04ad5b9d4b53b143fca83738e0  | 0  | 0 | 0  | 18 |
| 4c75d49a85201d5a54175c68b2442a35  | 0  | 0 | 0  | 18 |
| 39807e69bcd49dec962ee5df6fb86a4d  | 0  | 0 | 0  | 18 |
| e00b84177c1d8845e7475e2bd9c6d6a1  | 0  | 0 | 0  | 18 |
| c6bccf28f7fe5216e70027313bdf9e9c  | 0  | 0 | 5  | 13 |
| f37cf0f0767633199472033566483b5c  | 0  | 0 | 10 | 8  |
| 26d04ee96c0fd1ed476aa7a622758e8d  | 0  | 0 | 0  | 18 |
| 6dcaddc6952fdcd1c1cf24e258e31747  | 0  | 0 | 0  | 18 |
| b7e5b6ca3026588fae36745f29e24d24  | 0  | 0 | 0  | 18 |
| 53eae11aa20547329431fb347de5aee6  | 0  | 0 | 0  | 18 |
| ac97df90ec80907b77ecfd76d23205bc  | 0  | 0 | 0  | 18 |
| 8292f854f12895086f95d6d53e67bb0c  | 0  | 0 | 4  | 14 |
| 53a2cb6830af28e7643e024862bc3bca  | 0  | 0 | 6  | 12 |
| 5c621ebe5017abaa55260c7d1ad70532  | 0  | 0 | 0  | 18 |
| faea1ce2e1ebe997fb1545e6c8525663  | 0  | 0 | 0  | 18 |
| 131d08b378efb131f9f9b5e5cc3c8026  | 0  | 0 | 18 | 0  |
| f2b4225858a28d5807ca45b061ace842  | 0  | 0 | 18 | 0  |
| 306b0ec2d3432af50fb4e0c81e85bd51  | 0  | 0 | 18 | 0  |
| c3070a17fe90686a5515851a0ea89713  | 0  | 0 | 18 | 0  |
| d9bebb1281bf201db6b88da8751ac551  | 0  | 0 | 18 | 0  |
| b1fa6dcfd7701f717d0bf98095be8dbb  | 0  | 0 | 18 | 0  |
| 93835091d5fcbc1471ee30351fc6708c  | 0  | 0 | 18 | 0  |
| 0eb324cd2335875947f42f9b534cd721  | 0  | 0 | 18 | 0  |
| 9df8f7e42f9a78c0c146a80b61f66e99  | 0  | 0 | 18 | 0  |
| ce08f97fa74935c6b22233bbbd91d924  | 0  | 0 | 18 | 0  |
| a4c1895f3902cbb5e1dd53fc1c9f9cf1  | 0  | 0 | 18 | 0  |
| 294a9b377a58dc34426946799cacafe5  | 0  | 0 | 18 | 0  |
| b6cf195a658d0e94bb7c16ae62962817  | 0  | 0 | 18 | 0  |
| 0db7323889359fad45675467ca9fe1df  | 0  | 0 | 18 | 0  |
| b9c97dbe600e074ef5d58d982f72ef85  | 0  | 0 | 18 | 0  |
| 1d52b77495eae3050b2da7defff547cd  | 17 | 0 | 0  | 0  |
| b12f282932dabe634f5ebf10064766c5  | 17 | 0 | 0  | 0  |
| 51f0f93e453871ab049c2d2d8b772bfe  | 17 | 0 | 0  | 0  |
| c8f21ea451aea70863aa143f3bb73c01  | 17 | 0 | 0  | 0  |
| 413396657cbd93ea207303453efba0a4  | 12 | 0 | 5  | 0  |
| 7096503c995dc821fe3cc704e12f4bb2  | 17 | 0 | 0  | 0  |
| 905c4c88f7e09beb8f3303c2e994c026  | 17 | 0 | 0  | 0  |
| c7658d1b6cda69e5a2b022b06c76a5ce  | 17 | 0 | 0  | 0  |
| 03eddc6fef09c0ad1b02e6e42feb73c   | 13 | 4 | 0  | 0  |

|                                  |    |    |   |    |
|----------------------------------|----|----|---|----|
| 39ebb77e36d8a1cb01aabc7b9ca14313 | 17 | 0  | 0 | 0  |
| c77dc7289ad074c16a8685282fbb598  | 10 | 7  | 0 | 0  |
| 0a8bae4ca4ec4cd098943b6d36b3da98 | 17 | 0  | 0 | 0  |
| 9c3924b693cb4eceab5fe0f1740fd3a5 | 17 | 0  | 0 | 0  |
| a7941fb677db79584d6e5f8232bf2554 | 17 | 0  | 0 | 0  |
| 6bbb262225a1f0869f3589b99519b749 | 14 | 0  | 3 | 0  |
| 308bec6d8c1dbdade950f49c9c5ae430 | 17 | 0  | 0 | 0  |
| a6789011c54d0a4a2b1bef2bb7f5bb38 | 17 | 0  | 0 | 0  |
| 9e49a20c0f40a1bcc275d558c18e421c | 17 | 0  | 0 | 0  |
| 6615f2db17184d303ce4cbe3e8d7754d | 17 | 0  | 0 | 0  |
| 81e307e0a7c18acb52ee39fe5f015d6e | 17 | 0  | 0 | 0  |
| bf7864696210feee62d387e11afff8c5 | 10 | 0  | 0 | 0  |
| 59c442af993e1cfc8fc61eb57cfb722d | 17 | 0  | 0 | 0  |
| 48aa3a15e9cea56bb8f710438879e662 | 6  | 6  | 0 | 5  |
| 5b0685d80e1d5999b81c7792a3007e5e | 17 | 0  | 0 | 0  |
| cbb42007d36fbab566c171025a274897 | 6  | 11 | 0 | 0  |
| 36bb80e8940caf647d9f5d025afadb9c | 17 | 0  | 0 | 0  |
| 4b3009e1aa4fed00793605f181d64589 | 3  | 0  | 0 | 10 |
| c1239ecee106aea699b8a2f36c2ff118 | 0  | 9  | 0 | 0  |
| 396411b8dc16e5b9d35d43dbff6a48c6 | 0  | 0  | 0 | 0  |
| 7163df7b3e5cce1b7ae52e0c3212eb48 | 0  | 0  | 0 | 0  |
| d796f32bc19d44ec6e39d088ce0f0f45 | 0  | 0  | 0 | 0  |
| d9c838a79bd2e3cd64f50bffad29f514 | 0  | 7  | 0 | 6  |
| 2457188c02b21b4e228c436873a15b5a | 0  | 5  | 8 | 0  |
| 0c90cb53a82a03f2e2994d73c011852a | 0  | 0  | 0 | 0  |
| 6baef347c3a2c6ea405ef3c70a5a4ba2 | 0  | 0  | 0 | 0  |
| abae4580a016593a809f144d71fee1bf | 0  | 12 | 0 | 0  |
| 68494cd949722ac49325166b223e5ad7 | 0  | 0  | 0 | 0  |
| 2e7f61025b39fd762073ad57413de5e8 | 0  | 0  | 0 | 0  |
| c42ca4e6b91c83d1b79024bc3e2fd538 | 0  | 0  | 0 | 0  |
| 566fd978c328438a8baab54e110a5db3 | 0  | 0  | 0 | 0  |
| 21f9c6b9e703c470266461226bbc93e4 | 0  | 0  | 0 | 0  |
| 193069d8e34d04b8e343d2e25d9d34d3 | 0  | 0  | 0 | 0  |
| b53647c6d6ca09bf3c72cd1803276b17 | 0  | 0  | 0 | 0  |
| f6cc165276dc0338321b093d029844a9 | 0  | 0  | 0 | 0  |
| b191ff4b7210e4502b4c3fb2bdd72fa6 | 0  | 0  | 0 | 0  |
| 7cdd5524765d980c00c6cdf123ecbadd | 0  | 0  | 0 | 0  |
| 5a0166a3af96417cb3e4063a62c5d3f4 | 0  | 0  | 0 | 0  |
| 7b811f9c761e73b17e23b36d8f7b4536 | 0  | 0  | 0 | 0  |
| f4eb94b9aea5bb6f4ac9ab2625494369 | 0  | 0  | 0 | 0  |
| 0fb1a53499d02ff502a9e7b4bc2467ef | 0  | 0  | 0 | 0  |
| 80a34018f3581d90daf2c2d9a7c85801 | 0  | 0  | 6 | 0  |
| 6bed2972edc1303cdf574de5e5a583a5 | 0  | 0  | 0 | 0  |
| 30cc3411ed394bbd98573f0114ea7b82 | 0  | 0  | 0 | 8  |



|                                  |   |    |    |    |
|----------------------------------|---|----|----|----|
| c7e904046f5296b87fb1609b323947a3 | 0 | 0  | 0  | 0  |
| 2fc9a71072a040b5941ef167f472e50f | 0 | 10 | 5  | 0  |
| 5cd2a5b775efc1bed532246d3cea75f9 | 0 | 0  | 0  | 0  |
| d90baa197186fb1f51898eced3a8513c | 0 | 17 | 0  | 0  |
| 4945f9b72f5e422cf907c2054feb0def | 0 | 4  | 13 | 0  |
| 251846958e21fc9242f4bcfeff1fea4f | 0 | 17 | 0  | 0  |
| f5a45b6e25c9b6a9728cbf91e75bcf7b | 0 | 17 | 0  | 0  |
| 79ad07dbe6b8deab3a6d0f3834033ba9 | 0 | 12 | 5  | 0  |
| ab9fab222f562b44fcff0d96311d8e5a | 0 | 17 | 0  | 0  |
| 95e3d683bee757be763e9785ca0c0a50 | 0 | 17 | 0  | 0  |
| a161c1d5e2bce7bb86d1486c8f1f97c0 | 0 | 8  | 0  | 9  |
| b3ad41a2c16f30e5c26a2781c9e2a58e | 0 | 2  | 9  | 6  |
| e91a1dbba06ed5dd308c883c7ee41964 | 0 | 17 | 0  | 0  |
| 7c88819e768f010de9b8631631460ea6 | 0 | 4  | 10 | 3  |
| ada02c1a5f9574b335d60afc50ef7026 | 0 | 17 | 0  | 0  |
| 5e49b956b5e24844e6ddb183d412c75  | 0 | 17 | 0  | 0  |
| 14049415a13b2b68724a9389b32667d3 | 0 | 17 | 0  | 0  |
| d29e10e7adb8426a674f50e9ed4fe6ab | 0 | 17 | 0  | 0  |
| 435f3eb02430c24c6feaca04b99f9ce8 | 0 | 17 | 0  | 0  |
| 3bae248ace445358edaf293d67a42a95 | 0 | 17 | 0  | 0  |
| 04ecf121745c492521cfe7438fd1415c | 0 | 0  | 0  | 17 |
| 1efa1ce25960ea90522712b4f826f562 | 0 | 0  | 0  | 17 |
| 4dfbdf5d05e412adfe16f6f1af95e420 | 0 | 0  | 0  | 17 |
| d4aa5bbcd0890098ef78f96161010ab1 | 0 | 0  | 0  | 17 |
| 05cb19b7b8ec5210819ac6fc91561a19 | 0 | 0  | 0  | 17 |
| 43ecff83639413d47616c37441c4a67b | 0 | 0  | 0  | 17 |
| 2d70a913e971664079e0f02792ec56f3 | 0 | 0  | 0  | 17 |
| 86a183cd7e420393729360676f37cd8a | 0 | 0  | 0  | 17 |
| e2e8aea44f67455c7df45f7f1503a1f1 | 0 | 0  | 0  | 17 |
| a3985ed43ea54ef5df60e88a9cde1923 | 0 | 0  | 0  | 17 |
| df827e4e2c6b8fed002d087abd0c47b4 | 0 | 0  | 0  | 17 |
| 49e95ca71438e6b944c7752ebb3f4ec4 | 0 | 0  | 0  | 17 |
| bb9a63121544388fc1edc803f826b685 | 0 | 0  | 0  | 17 |
| dad4617be079058443a662a93c9e3fb4 | 0 | 0  | 0  | 17 |
| f50db56d745409da716cd7727e824cf1 | 0 | 0  | 0  | 17 |
| fd5bde25e229fd15505d1cbf5c633a32 | 0 | 0  | 4  | 13 |
| 20fdbad09b0cad09268cf8329507d2ad | 0 | 0  | 0  | 17 |
| 06589b33ab9e7883e2ff933d49946873 | 0 | 0  | 0  | 17 |
| 667887a3dd10f8a574108a353d2afe9c | 0 | 0  | 0  | 17 |
| 2d3f51896236ccb84468cf7c67da32f9 | 0 | 0  | 0  | 17 |
| d60eb54f074e869519339d4d4c9dff0b | 0 | 0  | 7  | 10 |
| e467c4aaaee39c48301f4e66311f76c3 | 0 | 0  | 0  | 17 |
| 9d34e4056080fb98b203a8c0150b2ffe | 0 | 0  | 0  | 17 |
| 474a4c83e748abe3f5ab101dc26fd2b5 | 0 | 0  | 0  | 17 |

|                                    |    |    |    |    |
|------------------------------------|----|----|----|----|
| c60f579ece35f26a47a70086ec323e3e   | 0  | 0  | 15 | 2  |
| ee3207a15b45a07e8dbd049f42b477de   | 0  | 0  | 9  | 8  |
| 355f3abf79fce1beb01a6d1d85d9698    | 0  | 0  | 0  | 17 |
| 7a112498076873e4ce9133b4d07fbb8d   | 0  | 0  | 0  | 17 |
| 3b40f2e763f4877c45a76d1a6bd8433d   | 0  | 0  | 0  | 17 |
| e5f3c999117c5f76174ca180d0d3d345   | 0  | 0  | 0  | 17 |
| 4fabec45e0160c68d87c76174dbf9a8f   | 0  | 0  | 0  | 17 |
| 61a41c7196c4661b28512dea102fa28d   | 0  | 0  | 0  | 17 |
| 6e11c9ef9146dfd1dec2abb56bfcfe87   | 0  | 0  | 0  | 17 |
| 227e417df667d451788669ff6d460500   | 0  | 0  | 17 | 0  |
| b16a511117c3cb7bf7ff8f9a1402e8ed   | 0  | 0  | 17 | 0  |
| b1fa18e9ec6c354e0cbe0140e17511ef   | 0  | 0  | 17 | 0  |
| 6dedbd02d402d8c202c45dd5e2ddb74    | 0  | 0  | 17 | 0  |
| 24d60357a3b818d290aa9df679382d8b   | 0  | 0  | 17 | 0  |
| 25293e7cb52eddd83314dcbfb7a161c1   | 0  | 0  | 17 | 0  |
| 725b0029328d97c17e2fb2712a6a1673   | 0  | 0  | 17 | 0  |
| 2fe3904fc5e049c859f3833e96470455   | 0  | 0  | 17 | 0  |
| 7f25bcc65007266e22f50cef0bc5c28f   | 0  | 0  | 17 | 0  |
| caf19beb44c7da889505642282cbe331   | 0  | 0  | 17 | 0  |
| 07ca6d0bb6b035611409f1926c18ba70   | 0  | 0  | 17 | 0  |
| 369fd5d91b3d8759afed78d60366c6b5   | 0  | 0  | 17 | 0  |
| f361f5af3f0cfc136f90dcf4b0202849   | 0  | 0  | 17 | 0  |
| 9c17eb3c9ffbc71d24da6dbe14efc986   | 0  | 0  | 17 | 0  |
| 77ac39e46e2561bfd411c55556315219   | 0  | 0  | 17 | 0  |
| d4f62eea271d88591bd1a1f7bcd347e1   | 10 | 0  | 6  | 0  |
| 778fcac8e9b0b79fc76ff246d4a0f3d5   | 16 | 0  | 0  | 0  |
| af6c67a83cb7ccb5b0b998a00275b641   | 16 | 0  | 0  | 0  |
| a208a3bb6abe4f4422fefafa1a819950d4 | 16 | 0  | 0  | 0  |
| c50f6279aab2e1cab5b0f95b754f82b3   | 16 | 0  | 0  | 0  |
| 08b6cc327b0869e13e5a60943c568015   | 11 | 5  | 0  | 0  |
| f9de842967ebbfa974bcc33bf8320763   | 11 | 5  | 0  | 0  |
| 649b1a70423cad69f98641c44b1c6fe3   | 16 | 0  | 0  | 0  |
| f99e79b37ccc5d116e4723ccbe63dd19   | 16 | 0  | 0  | 0  |
| fca2e548667e6bcaf114375a53c3fd09   | 16 | 0  | 0  | 0  |
| a9962a2b04db12040f1c3e86520d4de0   | 16 | 0  | 0  | 0  |
| ead034c20ec389f7f9d1c917cdc9d39c   | 13 | 3  | 0  | 0  |
| 5d082f659b24d53406b8f97d5a38a0ca   | 16 | 0  | 0  | 0  |
| 7a377f427d46d1f8c48045bf2f502fed   | 6  | 0  | 0  | 0  |
| fb43ebf21e0464a9735660fb6b81bf4a   | 5  | 11 | 0  | 0  |
| 4bb19586f9fe30155d24d34679b68971   | 11 | 0  | 0  | 3  |
| 01d1ffd3ab4a018dba922162362d5863   | 16 | 0  | 0  | 0  |
| 0b845217b3623e4e4602fe55f2751ffd   | 16 | 0  | 0  | 0  |
| 47783dbd13a45c98d89d6150bfa5a4ed   | 2  | 0  | 0  | 0  |
| b693620ce6084c6d0143444eac4c8bea   | 7  | 9  | 0  | 0  |

|                                  |    |    |    |   |
|----------------------------------|----|----|----|---|
| 10555e2fcf692295c18e6409f3d582bd | 16 | 0  | 0  | 0 |
| feb2f708e8da4a7c2b536bb4c1fda1e5 | 16 | 0  | 0  | 0 |
| 9be33fd4ab05f65698e76b97d4503d60 | 13 | 3  | 0  | 0 |
| 23299f4a270c53a6f6c4933abd19f302 | 8  | 2  | 0  | 0 |
| 4174379e48ddb1542dac57b2ba28e535 | 16 | 0  | 0  | 0 |
| 8ba1f5c755979a066eac6c828cb5c758 | 8  | 0  | 0  | 8 |
| 608b9f739a85d7d615e0dd1912791961 | 16 | 0  | 0  | 0 |
| acf4585150584f9f3253f54a9834359e | 16 | 0  | 0  | 0 |
| 059e004695f0fdd321ce861a9c7b75cd | 2  | 0  | 9  | 2 |
| b8a96ee38471096cce866ebddd9ea2d1 | 8  | 0  | 8  | 0 |
| 39d33b804ee7eb7bc1781135ed184970 | 6  | 4  | 0  | 6 |
| 143025880ed05ee36360f5a64e79a4c3 | 2  | 0  | 0  | 0 |
| d6de092293052f771e2c72dac23771cd | 16 | 0  | 0  | 0 |
| e2d3a015902f9e3a4816c70cb846fac9 | 16 | 0  | 0  | 0 |
| 40bec33d7545e986ae2c5cf735ce0fe1 | 16 | 0  | 0  | 0 |
| 3665fdf9bd5b598c367683aeb980fb43 | 16 | 0  | 0  | 0 |
| c913efa04b9a08355a2568f5c0216794 | 16 | 0  | 0  | 0 |
| 989cb707d93bf2b8d39673419a984c55 | 16 | 0  | 0  | 0 |
| 4d4546dbabc0a15f6a7504ae716766a6 | 16 | 0  | 0  | 0 |
| dcd19541fbab595783707c2fe488368f | 0  | 0  | 10 | 4 |
| b72898cc8e071bba39e63485e1bbed4c | 0  | 14 | 0  | 0 |
| bcbc122a95f0960598ae17d9728eda2f | 0  | 13 | 0  | 0 |
| 76ce6a9c08216da3c631ddf923a4ddc7 | 0  | 0  | 0  | 0 |
| febe104e21b8b3aa15f8e239ccdece16 | 0  | 0  | 8  | 0 |
| 45a9f5bdc601c0f28ae74e99d64c5412 | 0  | 0  | 0  | 0 |
| 8ae5e737bbe8347865a1facbf2cdf693 | 0  | 0  | 0  | 0 |
| 8cff59f1fc5f03d25c177b106bb053d5 | 0  | 0  | 0  | 0 |
| 9bf5938d3b990ae2fa581a83d80ce450 | 0  | 0  | 0  | 0 |
| 65409b0c57a9ea1dce6896c729463f43 | 0  | 0  | 0  | 0 |
| 9be76c1e408f7a7c6b74a56a9106c290 | 0  | 0  | 0  | 0 |
| 9d85b4ed1ab70c440946c100bb85aedd | 0  | 0  | 0  | 0 |
| af8ec4f1c891df66c36030bc0e13969a | 0  | 0  | 0  | 0 |
| 38517a5f6d9e47df42558ea566585f47 | 0  | 10 | 0  | 0 |
| 18e49521d77c429925a2df6bb70a8fe8 | 0  | 0  | 0  | 0 |
| af2a35d49ab873ac2d4d2ac98d759111 | 0  | 0  | 0  | 0 |
| 76a74ae5502dcacdc048b3e7ee825160 | 0  | 5  | 4  | 2 |
| 83f5fa04ea77c090e422728b3d2b500a | 0  | 0  | 0  | 0 |
| 18498bf56b1943072c326d862ce1d03e | 0  | 0  | 0  | 0 |
| 01d271587d42f8e2837b07095cc98f9a | 0  | 0  | 0  | 0 |
| c55aa422c5cb6afe0a4a77935bf0af8f | 0  | 0  | 8  | 0 |
| fa9ea7e202acb0aeaea9c78f9e157864 | 0  | 0  | 0  | 7 |
| 3223e7373d4a9b8551ac1f1ea0aa7249 | 0  | 0  | 0  | 0 |
| d0366732188824ebc37cde7ca4066f73 | 0  | 0  | 0  | 0 |
| a76aa9db14cafdaaa933e7e482e0ccf5 | 0  | 0  | 0  | 0 |

|                                  |   |    |   |    |
|----------------------------------|---|----|---|----|
| c1f75ef8dded8c3c098025010f4a6263 | 0 | 0  | 0 | 0  |
| ec1cb2e1b98984bfd11743f9b22578c8 | 0 | 0  | 0 | 0  |
| 2c00ac6a39eeca14e55434b49a785028 | 0 | 0  | 0 | 0  |
| 4b5818b6b6da7510304103c5c7a2ec79 | 0 | 5  | 0 | 0  |
| bf5c20000135369927439019811d1d48 | 0 | 0  | 0 | 0  |
| 037809da07c42e1c1cd1d7705ee52af0 | 0 | 0  | 0 | 0  |
| 058e89622ebe5e9a0bcf0253da846bf1 | 0 | 0  | 0 | 0  |
| ae6a9cd097e0b66c060a330d982abac6 | 0 | 0  | 0 | 9  |
| 5e6f4a8303d374fe6ca6101d0847859c | 0 | 16 | 0 | 0  |
| 760d1280fe030665fbef0c8d57ff3961 | 0 | 16 | 0 | 0  |
| 9a48cdce1bb873715590a156dfb3c4eb | 0 | 16 | 0 | 0  |
| f5946bdc25df7b8726f5ddb1ff1edce6 | 0 | 12 | 4 | 0  |
| d7f3ef3ff6777f3d99bf47e006feb34c | 0 | 16 | 0 | 0  |
| 43aff63c6fbff530aec26c65380098df | 0 | 5  | 0 | 11 |
| a4434c4b55001cd1d3e022710a59f52d | 0 | 16 | 0 | 0  |
| d90fff08ab3121106535ae7edd8b837b | 0 | 16 | 0 | 0  |
| 07ab75fb03a29ad18735714b45e50e2f | 0 | 16 | 0 | 0  |
| 8aeca776c0eb58713ced5aa9de49f3a3 | 0 | 11 | 5 | 0  |
| 36974c032ef2f9ab6be050a604802b35 | 0 | 16 | 0 | 0  |
| cc7098078147607c004ab0357f9046d4 | 0 | 16 | 0 | 0  |
| 65014b047da2974cfe3c15daddf83ea8 | 0 | 7  | 9 | 0  |
| 1b635efb3a3cb587bb67bb7225acc443 | 0 | 5  | 5 | 6  |
| 348bb0681b8b980c870613af8ee617ac | 0 | 16 | 0 | 0  |
| bfa4e6a4b28f836c1fab499973f7a702 | 0 | 16 | 0 | 0  |
| 3c0729d372033a59d688fd270e9b7236 | 0 | 16 | 0 | 0  |
| cb69815994846c83fda551a7ac0dd7c6 | 0 | 16 | 0 | 0  |
| 8cd970917b155c5be29c0baa6268a9e6 | 0 | 10 | 6 | 0  |
| d4b3405753393527fee27d4799c67436 | 0 | 5  | 0 | 11 |
| beebe9f2d460d7246c4c5a3035c38052 | 0 | 16 | 0 | 0  |
| 00ea5b1ebd4edfd292b9ab1e22636e64 | 0 | 16 | 0 | 0  |
| ef94bdbbe3592e8e582d8bce4894ef71 | 0 | 16 | 0 | 0  |
| 1e1c94714bfe2ac8c051a464c3c5e5a2 | 0 | 16 | 0 | 0  |
| fc7e495908530342683c3e7886681f46 | 0 | 16 | 0 | 0  |
| c1d1a90d5bfc8c852cc2cebc4bcdcf9  | 0 | 16 | 0 | 0  |
| 94a767978bdec4b640c348379577770b | 0 | 16 | 0 | 0  |
| c40393694b93a8310dad2b2928e23224 | 0 | 16 | 0 | 0  |
| c30c70b346baa754280d4e8708a7e9b2 | 0 | 11 | 5 | 0  |
| 6aef3c431eba812f6c5b5ef97ad29d1b | 0 | 16 | 0 | 0  |
| 094b10c7c5a91e6aded47739fec36798 | 0 | 0  | 0 | 16 |
| 1b5d220dfcc1a85b7b43c0d1b94f61f5 | 0 | 0  | 0 | 16 |
| 78c4e39e728cf1df5a6d378fd0ebecd3 | 0 | 0  | 0 | 16 |
| be3dab79f389a795f4441204d481cfb1 | 0 | 0  | 0 | 16 |
| 8794c4cbac4905954d8df8bac03b5e66 | 0 | 0  | 0 | 16 |
| 424bd8a73b0937ed197946870ba92e98 | 0 | 0  | 0 | 16 |

|                                  |    |   |    |    |
|----------------------------------|----|---|----|----|
| f9a3d32b0fa2c5348f057e868aabb41  | 0  | 0 | 0  | 16 |
| cea2b9ec842134d5c5ad47657b3a25db | 0  | 0 | 0  | 16 |
| 59596180e7b02cc89e5bb43040a49311 | 0  | 0 | 0  | 16 |
| c2e008a76d3497afa1333792d1b1941c | 0  | 0 | 10 | 6  |
| 1527370449d5325cf4a12e9c8737c773 | 0  | 0 | 0  | 16 |
| 423b77fa6214ee416d53faa63b333465 | 0  | 0 | 0  | 16 |
| 25c6fe91ab77f2a5a2e76127241d0d86 | 0  | 0 | 10 | 6  |
| 0acf134ea1d8630c1b03bd5a6df6b351 | 0  | 0 | 0  | 16 |
| 36109e104927df4a7ad10d8fa2997b2c | 0  | 0 | 0  | 16 |
| 0be0669e30c8bc203132b6e57745eb8b | 0  | 0 | 4  | 12 |
| 2976eac83e78bbe1ede3d36a4d4229fd | 0  | 0 | 0  | 16 |
| fae1bbbb0e2743764fa8862d74445acd | 0  | 0 | 0  | 16 |
| f8e8b52da2366b110b6be0f5d3def785 | 0  | 0 | 0  | 16 |
| 3cae8930a4c14a9d0e752219cb5f7a83 | 0  | 0 | 0  | 16 |
| faca477772300893faecf3e57f7d2a76 | 0  | 0 | 0  | 16 |
| d0d70c68d7f415c006d0e21aaa4b8090 | 0  | 0 | 0  | 16 |
| f7e4d0c440b8d1d477e53333c31abd47 | 0  | 0 | 0  | 16 |
| 4fd75c18c4ab44b25e84d44d05e6ddf3 | 0  | 0 | 0  | 16 |
| 5f30d5df2db808bdbc9496357373d999 | 0  | 0 | 0  | 16 |
| 40337516f1b9459c385ea37c1859c485 | 0  | 0 | 0  | 16 |
| 9269dadf5dd8706d158abaff5f1cd61d | 0  | 0 | 0  | 16 |
| 8f1f18d5a043d2551dcca605e7b50420 | 0  | 0 | 0  | 16 |
| 428ff238df489711cb7a6547d9292327 | 0  | 0 | 0  | 16 |
| 50e5bcc75dd12bf176b91eb452892fcf | 0  | 0 | 0  | 16 |
| 08535e5fb400e8d06bd828075f983a58 | 0  | 0 | 0  | 16 |
| b634b8136d8e15a3a85f83377eaa0fa9 | 0  | 0 | 16 | 0  |
| d03180757f04e49e3872311d0b28a325 | 0  | 0 | 16 | 0  |
| f63d23bbe252192abf24d7a7603084e9 | 0  | 0 | 16 | 0  |
| c204bc419dad02224cecf75d08990e6b | 0  | 0 | 16 | 0  |
| 9e9e869c36393f31d8c23d3c10ae029a | 0  | 0 | 16 | 0  |
| 416826dd600cfcc38dbd82b86240fdff | 0  | 0 | 16 | 0  |
| 43850da8ca17405db97c911ec63fb570 | 0  | 0 | 16 | 0  |
| e48463b485b7178b945a419736cf9811 | 0  | 0 | 16 | 0  |
| d3f1d95cf5044e0515afa5a5023c8652 | 0  | 0 | 16 | 0  |
| e27ad5296eace380220c8d5daca39fc8 | 0  | 0 | 16 | 0  |
| d36a0395cd10496fa7800d2336cc986b | 0  | 0 | 16 | 0  |
| acd1c67c2b61d3c9f47e71fbaf06cbf6 | 0  | 0 | 16 | 0  |
| 44ad318b021dcbb3222aad7c352e4445 | 0  | 0 | 16 | 0  |
| 1bdebc83cc8d2f3e620d83958a060eae | 0  | 0 | 16 | 0  |
| 5d4ad81ca98adec368594a68d6ac0828 | 0  | 0 | 16 | 0  |
| a09103ca73ff8e57c7a27c763c90b78d | 0  | 0 | 16 | 0  |
| 1dbfc6b13a018d9fddef70a92b7e05c7 | 15 | 0 | 0  | 0  |
| 19e23119f2b53eabab61b93192dccc21 | 15 | 0 | 0  | 0  |
| ddaf8dcab39b48a0b4eab8e522402fa4 | 15 | 0 | 0  | 0  |

|                                  |    |    |    |   |
|----------------------------------|----|----|----|---|
| 1ccfalecb5cbfca253864b48c180486b | 15 | 0  | 0  | 0 |
| 34c9df9371366c708e318dce69cc6ada | 15 | 0  | 0  | 0 |
| 2f26c35c4416866dba58b2902a5aa12e | 15 | 0  | 0  | 0 |
| ed2ad6dd12ecb9efdaa52c4d0ffb47cd | 4  | 0  | 0  | 8 |
| ac51fb9c49a402017f0ec375f04d4fce | 5  | 0  | 0  | 0 |
| e6f1c2a7c6733079bba1f2d4e3b7399e | 13 | 0  | 0  | 0 |
| 4f966ea35ee2d9a0438198e272c01f79 | 15 | 0  | 0  | 0 |
| 63a37e1a7a500788e82a69c2beeafeb2 | 3  | 0  | 8  | 0 |
| 6b66aca42c1937005e5e35f1cde5ff76 | 15 | 0  | 0  | 0 |
| 44373fd7a69b8e4a0477d1abe135cb99 | 15 | 0  | 0  | 0 |
| 0c31aafd881c24e42cdd17ca6c0cb411 | 15 | 0  | 0  | 0 |
| 341198f431bba6eaf14af26c94b2a975 | 15 | 0  | 0  | 0 |
| 724964b6141e872bbdde53b8249edcae | 7  | 0  | 0  | 0 |
| dec3d22fa503980126ceb408b86fe4fa | 15 | 0  | 0  | 0 |
| 958793e64ca30d8dd8d187d526e47819 | 10 | 0  | 0  | 5 |
| 7815f5676546249fdb5a0263e4394eb0 | 15 | 0  | 0  | 0 |
| 39695b3614a276ee840680dab5a0eafa | 15 | 0  | 0  | 0 |
| 0ee1f31b6e9ca503f7c423b6e82ee2da | 11 | 0  | 4  | 0 |
| 3a3e02f235b6955f36fef269c30ed16  | 11 | 0  | 4  | 0 |
| bf1ac9d5605ead69898296bef2994d54 | 7  | 8  | 0  | 0 |
| a618a3e77e399905bfa8d5d73cf9bc5e | 5  | 0  | 0  | 0 |
| 77c6fff53a595ab74291072128a417ac | 15 | 0  | 0  | 0 |
| 0b0fa947e46b996eb8234aa4e390f43d | 15 | 0  | 0  | 0 |
| e7a9b4689b90fd736a24b8e8f5903bea | 2  | 13 | 0  | 0 |
| 03b56a4b22e06e3ffcb59c7312b3c364 | 15 | 0  | 0  | 0 |
| c925a2548da2197d594993344c28001e | 6  | 2  | 7  | 0 |
| 32fefac730aa7f7de6a3af80e457365d | 15 | 0  | 0  | 0 |
| 1844e13756f8e5472a8a6ab646b5d32e | 15 | 0  | 0  | 0 |
| 04780ed30469a6293e129b9c687b8455 | 0  | 0  | 0  | 0 |
| e0d25f7af941fbf698ea58e30a88b215 | 0  | 0  | 0  | 0 |
| cc340f69811a77754baf59b438aa8ac4 | 0  | 0  | 0  | 0 |
| 9b2e3b7f90c8c09fb69fe1197d76d5fd | 0  | 0  | 0  | 0 |
| 7b36410b6ddca36cfb7d8643f800f452 | 0  | 0  | 0  | 0 |
| 0ca29882a538942808fa1aa7342ca375 | 0  | 0  | 10 | 0 |
| f5394a9194d5b3089f2275220d9da64a | 0  | 5  | 0  | 0 |
| 67111dffac8aa2c59dd9819abdc7ea4f | 0  | 0  | 0  | 0 |
| 2c386db0d6dbc3514ada0d9ed14bae9d | 0  | 0  | 0  | 0 |
| a74031e776c403b70916080af955fdee | 0  | 0  | 0  | 0 |
| da185943062e8dee1ad506d607285ac6 | 0  | 4  | 7  | 0 |
| b8224acbbc41542eba166ef160fe45ca | 0  | 0  | 9  | 0 |
| d8f4f3f8398437cd63196315f4f6c9fe | 0  | 0  | 0  | 0 |
| faf1a5f786ad88f64d7d4354e219058f | 0  | 0  | 0  | 0 |
| 0579f7d36ab01561a906ae7a8ad00942 | 0  | 0  | 0  | 0 |
| 359dde1e757d21a77b04f4ef1daa4204 | 0  | 0  | 0  | 0 |

|                                  |   |    |    |    |
|----------------------------------|---|----|----|----|
| 68f07855416896aac091874614a967f8 | 0 | 9  | 0  | 0  |
| 749307be738f5851bf11ce5a29082a39 | 0 | 0  | 8  | 0  |
| ab8d2ceebd6f2b1f2b2d39e647ae6e28 | 0 | 11 | 0  | 0  |
| 9dbb398dfdc080a41dc4fe48f968b8   | 0 | 0  | 0  | 0  |
| 5d452cf40f1862a0a36289f25837aaab | 0 | 0  | 0  | 0  |
| 564b3db0ee12e19fc86a4d500d87affb | 0 | 0  | 0  | 0  |
| 2d30579ab1bc1683858072df7b261c6d | 0 | 0  | 0  | 0  |
| 8f1713b4862ccd8a2a6453e2aec295ea | 0 | 0  | 12 | 0  |
| 3b11cd08e41164ef7f97db3b7f458869 | 0 | 0  | 0  | 0  |
| 0e72925adae18a411e98703bf7ec4e40 | 0 | 0  | 0  | 0  |
| f84dab0b69889339cc610afd4dbf13a2 | 0 | 0  | 0  | 0  |
| 3d63ad1f81bd77bd8ce6902ef344923c | 0 | 0  | 11 | 0  |
| 0f9a569532700038888105cd6353824c | 0 | 7  | 0  | 0  |
| b01e6a7036adbc004abddc07c3758f4e | 0 | 13 | 0  | 0  |
| 1ca5ec9591d8b07fa1984fbb8537b67b | 0 | 0  | 0  | 0  |
| 885b5b5ce61cab29ef5d2b8798ec89e9 | 0 | 2  | 9  | 0  |
| 6f32d4279d894964f2ee8739a531d614 | 0 | 0  | 0  | 0  |
| 9293bc4bc83265a3f2ad351943ab73ce | 0 | 0  | 11 | 0  |
| 060a2668712530660e205cd24a3f1c23 | 0 | 15 | 0  | 0  |
| af1e8ab2ec20a2bc0034899f4bdaf99c | 0 | 15 | 0  | 0  |
| 3b346fde1f4c1208aa1ae684e0ef0d11 | 0 | 15 | 0  | 0  |
| 6819849817003c60a385142c860220b7 | 0 | 15 | 0  | 0  |
| 3049de5f5353e2f00bb89299383eb044 | 0 | 9  | 0  | 6  |
| 1dac597560846b38f9699dc80a35c475 | 0 | 15 | 0  | 0  |
| a788d19b635c64e5060aba3844b10783 | 0 | 15 | 0  | 0  |
| f90751669e01b521d48606c90441fa58 | 0 | 7  | 5  | 3  |
| 9f1ce83ee713fe80d13a245d5f27508e | 0 | 15 | 0  | 0  |
| 7b6db566cdeb81073a6e253f3ab399ea | 0 | 7  | 0  | 8  |
| a9966371d88cf3d5374da3be24796f85 | 0 | 15 | 0  | 0  |
| b83bea2c96bb933c7cced7b67750eb59 | 0 | 15 | 0  | 0  |
| 262d927ac627f6d8c86c9dc8d8bfb3d1 | 0 | 15 | 0  | 0  |
| af96d57bfa4dad10b094e43acaf207f3 | 0 | 9  | 6  | 0  |
| fe445bbbe43d78acf785da560a6cf702 | 0 | 3  | 0  | 12 |
| f84397079cd4faa68c31d88520d1a029 | 0 | 15 | 0  | 0  |
| 2d0249a622d6394b6e182241a6492aa5 | 0 | 4  | 0  | 11 |
| a83c730ae68274ab6051e4557474caed | 0 | 9  | 0  | 6  |
| 799f9266e100087a49cec7ae4dfdb52e | 0 | 15 | 0  | 0  |
| 909b37dc66ca4d7602b6bfddefbec912 | 0 | 6  | 9  | 0  |
| 0f9c4096eed8a9ae5113a1812cbca64b | 0 | 0  | 0  | 15 |
| 1b258e57b24131a32de583d12f2809b2 | 0 | 0  | 0  | 15 |
| 3fe1216248b4ac9ffe898ba15f317594 | 0 | 0  | 9  | 6  |
| 2fc5c7683b57b2e57c08aaf1d7ef4d15 | 0 | 0  | 0  | 15 |
| ec3be61efee7640e7855d53c601bf0ce | 0 | 0  | 0  | 15 |
| 1f84f85908c92fbb23d5b716eb75533d | 0 | 0  | 4  | 11 |

|                                   |    |   |    |    |
|-----------------------------------|----|---|----|----|
| 2d0c8820fdf950fae9ada0085aca6206  | 0  | 0 | 0  | 15 |
| 8a577e6cbea748b7cd81511f8ce82cd8  | 0  | 0 | 7  | 8  |
| df1ed6a99abbc7f176ed156ba830f5b2  | 0  | 0 | 0  | 15 |
| 07144dff41a15027638516778312a02   | 0  | 0 | 8  | 7  |
| 9b29cc17fc3f04cdda97797e804eedce  | 0  | 0 | 0  | 15 |
| 474d3d74a0d1f2cfb6c574a842cd8c2d  | 0  | 0 | 0  | 15 |
| 5a953301a77c8e8a33a392963700205b  | 0  | 0 | 0  | 15 |
| 9b4eb2b5ae3056ba1f844976d3d0ffd5  | 0  | 0 | 0  | 15 |
| f74396de3a57ae1787e007217f662fe7  | 0  | 0 | 0  | 15 |
| 788c7b3b58e7d7dde92843f976fbab62  | 0  | 0 | 0  | 15 |
| d7f2a3b4e906246a161bc5e5d653a4d3  | 0  | 0 | 0  | 15 |
| 17946bc6098ff0cab9c3bd54024744d7  | 0  | 0 | 0  | 15 |
| 600d3c88d8a248cf7530c9847f4630f1  | 0  | 0 | 0  | 15 |
| 91fa6a16b62e543a82edbc4e9c10af2b  | 0  | 0 | 10 | 5  |
| f2d2397f28312da7bace9f633ce1fcaf  | 0  | 0 | 0  | 15 |
| ffdc7ab75c620fad981114f1eb2c33cd  | 0  | 0 | 0  | 15 |
| 91f89fa4a9e82092e37fade61ad3c513  | 0  | 0 | 0  | 15 |
| 4b1294c434fcecf28ba674eeeacf689f9 | 0  | 0 | 0  | 15 |
| 948cf4d5f37147195d24f3897e7b7ffa  | 0  | 0 | 0  | 15 |
| 8cd09e0110b47304c8ed80dc188abf3a  | 0  | 0 | 0  | 15 |
| 6f5b3ef3649664150b93e42a45fbe79a  | 0  | 0 | 0  | 15 |
| b9f66e83e9a9852b9e5981610f929dfa  | 0  | 0 | 0  | 15 |
| d313ac37855e025e478f98e9432fb3af  | 0  | 0 | 15 | 0  |
| 46ae977497bfedee96033e3adf10bbb5  | 0  | 0 | 15 | 0  |
| 2af3d2b899fa211d7bb80302ac7a44f0  | 0  | 0 | 15 | 0  |
| 85ff0d09daf84d29bcceedb2142c6c9   | 0  | 0 | 15 | 0  |
| 26a8f04bfe17ec286e4863b230278d5a  | 0  | 0 | 15 | 0  |
| 8afd16a2d77df50d30d64792c5f7523f  | 0  | 0 | 15 | 0  |
| 706f345f8cea97562cafe21b784d68db  | 0  | 0 | 15 | 0  |
| e831527ee61a6a3b0cd0a9b68be8a727  | 0  | 0 | 15 | 0  |
| e2cb82bd66ff081377a7109c9864a4b1  | 0  | 0 | 15 | 0  |
| ad8c039433da389e0b4d159c73f2ddb8  | 0  | 0 | 15 | 0  |
| 117ee8cc9921b631c9e1da435988e482  | 0  | 0 | 15 | 0  |
| 1cd4c9b56977a5b838857bfaa68d32e1  | 0  | 0 | 15 | 0  |
| 47466de9fa401b4a6df5866f91bf1eb8  | 0  | 0 | 15 | 0  |
| 7fc4731247b944ca042c74e7ba3d0be2  | 0  | 0 | 15 | 0  |
| 14cb753fe40127d7dfc246d1ca28fa60  | 0  | 0 | 15 | 0  |
| 937dea1d406848dc610a28d005e384d2  | 0  | 0 | 15 | 0  |
| a6611370142f9195673b2b3ca93e71d2  | 0  | 0 | 15 | 0  |
| f4eb1901f61c2c154e4c8ed18c5f0f91  | 0  | 0 | 15 | 0  |
| 253a43f1a22eeb0323e36221a89ac6f7  | 0  | 0 | 15 | 0  |
| b591eef5a48eaeabb074e7c38c5c93cb  | 0  | 0 | 15 | 0  |
| be40ef1d3462abf5607623da7da64bda  | 0  | 0 | 15 | 0  |
| 7cc506f8e950b77cb25e78e918a0174a  | 14 | 0 | 0  | 0  |



|                                   |    |    |   |    |
|-----------------------------------|----|----|---|----|
| 515b16ac275c890d0ecab1cc84a52aa8  | 6  | 8  | 0 | 0  |
| 4f8faa6db7b735e03017e46815c5fcb8  | 14 | 0  | 0 | 0  |
| 64aca06b43538d07e52d0f5a5f8d6c95  | 14 | 0  | 0 | 0  |
| a4d29b02b2419209bf8af40c89acdabe  | 14 | 0  | 0 | 0  |
| d7d2f3c66e74bfafbe47b6891087a6b0  | 14 | 0  | 0 | 0  |
| 89ed3337e2bde9d6bee2dade7a0de0c7  | 14 | 0  | 0 | 0  |
| 822b7fd1d81c58581031553711e81b0d  | 14 | 0  | 0 | 0  |
| 65a39516d59aefa06d3d259593027c6f  | 4  | 10 | 0 | 0  |
| 6c4f1a402ed0a042acc5755b2dac61be  | 14 | 0  | 0 | 0  |
| 42da16c5f654432fc640d7178ac240e9  | 5  | 0  | 0 | 9  |
| fa4586d717a2febd001a76ca1226c470  | 14 | 0  | 0 | 0  |
| 4ce71d4c0f0b240f42e0d415965696ca  | 14 | 0  | 0 | 0  |
| 16f210e41bd5a1f2414b4cc244dfffc64 | 14 | 0  | 0 | 0  |
| 752a13f8e85184ec75380e234b120148  | 6  | 0  | 0 | 8  |
| 1bce9c48ee48e5c0895c5e8982ca01e2  | 14 | 0  | 0 | 0  |
| 727b708fa51844b87ce43597b515af99  | 5  | 0  | 6 | 0  |
| 49b3a6eaa74cde76877a05e100a38f4d  | 7  | 7  | 0 | 0  |
| 12fe81419dcf23a3d83d3198a67a34fa  | 14 | 0  | 0 | 0  |
| ab6cd8d96e5343feef0e9370e6c25f0c  | 14 | 0  | 0 | 0  |
| dc7a5db3193e983826cc57b89936f2bfb | 8  | 6  | 0 | 0  |
| 50105ca04dc4b19777970164817e77d8  | 14 | 0  | 0 | 0  |
| 723538d2ab98a235053773509906c513  | 3  | 5  | 0 | 6  |
| aafc8991bdcd2730e17e4400e7f7083d  | 12 | 2  | 0 | 0  |
| 02a069c0c2c2dbc325b261177a286d3d  | 14 | 0  | 0 | 0  |
| fa38939f799652f26944913f49b02e07  | 9  | 5  | 0 | 0  |
| d23a7f41ade8fe480c0a18fbb75db0a8  | 14 | 0  | 0 | 0  |
| 0e66ea95d7eaae24f35fe45d65b8b6e3  | 14 | 0  | 0 | 0  |
| d4aad42407207830c1697c51cdfd4858  | 14 | 0  | 0 | 0  |
| 0b0898360d92faaf519b1f70b919b989  | 4  | 0  | 0 | 10 |
| 62dec766f92cf26b90d6e0d68219f015  | 4  | 0  | 0 | 10 |
| 07a4e12745d3443ff16b17c89790ae5a  | 14 | 0  | 0 | 0  |
| 45cbfde170182bc9b75245133ddb2b3c  | 2  | 12 | 0 | 0  |
| 512adeefae3987d799389c79b4f1c81c  | 8  | 0  | 0 | 0  |
| b94f95f5da9b8bfd7ba6beb738da8953  | 14 | 0  | 0 | 0  |
| de4720f74782d4c13fd0029f70c66001  | 14 | 0  | 0 | 0  |
| c87c4492a795cf302bcfcd8b45407260  | 14 | 0  | 0 | 0  |
| 9d047bc1545ae5b95454940fe4cfcdd4  | 2  | 12 | 0 | 0  |
| c07cae1936d2ccacce16768fd660f894  | 12 | 0  | 0 | 0  |
| 93e7be9079ecb2fd16a08d54e18a90a7  | 14 | 0  | 0 | 0  |
| 70d59a26efea670c297a25b93476b39c  | 14 | 0  | 0 | 0  |
| fbelede4518307c70428655dbafee5ad  | 7  | 0  | 0 | 7  |
| 89b90a45e08945ae344cf20da3e16ea4  | 14 | 0  | 0 | 0  |
| 25adeefdfa07ae10fa260e526002c44f  | 14 | 0  | 0 | 0  |
| a1412e52d65f62d70ff0f1eb9455ec7a  | 7  | 0  | 0 | 0  |

|                                   |    |    |    |    |
|-----------------------------------|----|----|----|----|
| da28bd0b38d1c915df6d432ecc3a4bfc  | 14 | 0  | 0  | 0  |
| 90dc1a9133d750bc6dbc0f54642542b9  | 0  | 0  | 0  | 0  |
| b478dd9e454f4a42e1fe96e7e5409d80  | 0  | 10 | 0  | 0  |
| f221dfdc946b065cc3749f3f613102    | 0  | 0  | 7  | 0  |
| 98c40cfdaf19ceec01aec480bdf880707 | 0  | 0  | 0  | 0  |
| 8b80aae854556cf7a8cf64d31d297973  | 0  | 9  | 0  | 0  |
| 70e46b738c9778d7d95851da8a168f10  | 0  | 0  | 0  | 8  |
| 0d6d744149cebf69fb5f7a61ce87d2cf  | 0  | 0  | 0  | 0  |
| c6aea22d8520f54835c8cddbdfdc0a1f  | 0  | 0  | 0  | 0  |
| 512fa5c8111e6392a442f96edbbad5c7  | 0  | 0  | 0  | 0  |
| 117c116b9fd94d46a0e8c875278c501c  | 0  | 0  | 0  | 0  |
| fcfbdd42fd3b7f3295d88c8d755b6b34  | 0  | 0  | 0  | 0  |
| 569cacb3ccb0aec28366709e4d5e70b0  | 0  | 3  | 0  | 0  |
| a9cbc72209bd84d5aad6bd5a0fb3552b  | 0  | 0  | 0  | 0  |
| 007257d11b6ca5117c35e63b23149a2f  | 0  | 0  | 4  | 0  |
| 691f76ae13a4b86daf69ade05006bbbc  | 0  | 0  | 5  | 0  |
| 21efb21dff10c440b0211dbcfa47f89e  | 0  | 0  | 0  | 0  |
| 36ee5d73cf38f2336a76c3da56b7a257  | 0  | 0  | 0  | 0  |
| 986e4443c29411096fe561f6dce5d9eb  | 0  | 0  | 0  | 0  |
| 3754bfa11bbdf1a54fb9d27defa5f45d  | 0  | 0  | 11 | 0  |
| 82cd7a78c58292d3fda57797ec067fe4  | 0  | 0  | 0  | 0  |
| 25329f5628a739129cd65174ca03511c  | 0  | 8  | 0  | 2  |
| 266f5d5e3549ae5b999ad59b1a33ea76  | 0  | 0  | 0  | 11 |
| 58bc7b381f91dd4db9be3c41ec0dc1ca  | 0  | 0  | 0  | 0  |
| 9878aaa3ce9145e89db04ca93fadb8a5  | 0  | 0  | 0  | 0  |
| 09a2f774f521faa420157b03903b739b  | 0  | 0  | 7  | 3  |
| 71b6eb524955972bca329ab66249e833  | 0  | 0  | 0  | 0  |
| 3e8d3a162c8b5bacf1ca1c152e638cc5  | 0  | 0  | 0  | 0  |
| 12e1aa060b1533b7374f82146a4907aa  | 0  | 0  | 0  | 0  |
| 9e985236213774f4c6192aa95bff8e1b  | 0  | 0  | 0  | 0  |
| f59098d500567c6965dbe5c0a6f40640  | 0  | 0  | 0  | 0  |
| 19e4e5bcd68689df29223bbe2d5bc458  | 0  | 0  | 10 | 0  |
| c691d776ad6760f1449b089d9f1647dd  | 0  | 0  | 0  | 0  |
| 4b9a4e0809ea23606404e7271f212a50  | 0  | 0  | 0  | 0  |
| 53612ea666fa6b860e421f53b7ba8c1a  | 0  | 0  | 0  | 0  |
| 02054243ad2c5ae325fbcf1c510a43b0  | 0  | 0  | 0  | 0  |
| 984befd43a3ecd34ed7b5e36adcf697f  | 0  | 0  | 0  | 0  |
| 51ee27bbd7f8c784dd257433aa790bf2  | 0  | 0  | 0  | 0  |
| a0f5a5b134adcbe8deb1d678bc3da440  | 0  | 0  | 6  | 6  |
| 0705cba698bbc1003a55b58e727a9095  | 0  | 5  | 0  | 0  |
| 77c5ba32f573564aae253f56dcccfee3  | 0  | 0  | 0  | 0  |
| b5d80dc423383ca8d53b27eabe4a6690  | 0  | 14 | 0  | 0  |
| 5741a150bae6356eb9dbccdda4d30a38  | 0  | 14 | 0  | 0  |
| 904f25e86ce42d3634f43cd6da5b62c8  | 0  | 14 | 0  | 0  |

|                                   |   |    |    |    |
|-----------------------------------|---|----|----|----|
| 1b56a9b4b7966b08400e4696fd83a260  | 0 | 14 | 0  | 0  |
| 46eb3216fba9f590a98f5e39cb6cc7b7  | 0 | 14 | 0  | 0  |
| 847a81903b8c179ab0ac7b717fd2aa99  | 0 | 14 | 0  | 0  |
| efcb322b145d196817d0e7fed891d299  | 0 | 14 | 0  | 0  |
| b01b06523a04fd4275bdcc92fb011545  | 0 | 14 | 0  | 0  |
| ac049c0c3ffc4a10f8b49b21fed44b80  | 0 | 14 | 0  | 0  |
| 2544289c39e644ae147b287efe2e6967  | 0 | 6  | 8  | 0  |
| f3154e6ece8d9ccc05b3e09a3f682fab  | 0 | 14 | 0  | 0  |
| 2904cbc5dbe6e431d3d9866aa026f692  | 0 | 14 | 0  | 0  |
| 967ae24b653945b516b8c32e2f4ec8e2  | 0 | 14 | 0  | 0  |
| efb7d14261917c39ff0feff403eae574  | 0 | 14 | 0  | 0  |
| 2d32bd1e3a8088f161ab7a1d3bc81c04  | 0 | 2  | 12 | 0  |
| 89c4926eb84b53a8460dd6c8c0b4021c  | 0 | 14 | 0  | 0  |
| 3cb9f80dfa26532234eefe439812d729  | 0 | 14 | 0  | 0  |
| 7fb9b0e5476bbd062d3bde9404eff47d  | 0 | 14 | 0  | 0  |
| 31d5ab366a86a8a34fd361957c8bb4e9  | 0 | 9  | 0  | 5  |
| 17335ec115a48125acca31e4b6165447  | 0 | 14 | 0  | 0  |
| a4b7655a6914339117dbcda88ec42ea6  | 0 | 3  | 11 | 0  |
| 7bfd9c583efd69fde352568e6ed00a    | 0 | 14 | 0  | 0  |
| af4e4405d49002edde313fa6ba9c4890  | 0 | 14 | 0  | 0  |
| 5d8dca4a491da19ffb3cfca12cec3a2d  | 0 | 14 | 0  | 0  |
| faf1237e9e7cf5bef559902604590d2d  | 0 | 14 | 0  | 0  |
| 29934a3c0a87e2838796759393b9076b  | 0 | 14 | 0  | 0  |
| 1d8be466430ecf61b8f54046c4ed9c7e  | 0 | 14 | 0  | 0  |
| dd0dc8eb17d92de9945836eceb3d48f0  | 0 | 14 | 0  | 0  |
| 10b91edbcedb7669456111049ba509d0  | 0 | 14 | 0  | 0  |
| 4479dcbbf8d46c323dfabf053881ff06  | 0 | 7  | 7  | 0  |
| 6338f5ee8e3cdf3fbdfb82cba4b475c9  | 0 | 0  | 0  | 14 |
| 2effabb5459f543333f622a69320d100  | 0 | 0  | 0  | 14 |
| 662084f89f9e948b5cbe73e7e229396f  | 0 | 0  | 0  | 14 |
| 086037efb463e5ff40aa014831bf98f2  | 0 | 0  | 0  | 14 |
| 8b97a711f71cbf2fa5e5507b7aa5e2a5  | 0 | 0  | 0  | 14 |
| 99c8750bcd72094bbf79677e8d813eb7  | 0 | 0  | 0  | 14 |
| eb1d1b3ed8765f84db5ca89c44c9aeba  | 0 | 0  | 0  | 14 |
| d7c0bad82d85230ff0057b479da09c38  | 0 | 0  | 0  | 14 |
| 04c858a3e3ad97a4aaafc8e196dbf5535 | 0 | 0  | 0  | 14 |
| 00a1afaf521a6917a61bb9aeb46d041c  | 0 | 0  | 0  | 14 |
| d4a9d7ee9d777e4ff6a2924a6916b4e7  | 0 | 0  | 0  | 14 |
| 802fa1a02923feeb64514e4217464006  | 0 | 0  | 0  | 14 |
| 7e326913d8f16d154a949147968f57e3  | 0 | 0  | 0  | 14 |
| b4f7e9478ef5414dc9a28987e3276907  | 0 | 0  | 0  | 14 |
| 25c5c2e3ac3e69181631c2e82b5cd6fb  | 0 | 0  | 3  | 11 |
| d8964fe8a46b6adb15d70c0d1f74a9fa  | 0 | 0  | 0  | 14 |
| 4e99c6308d520545f1fcd9799a08630e  | 0 | 0  | 0  | 14 |

|                                  |   |   |    |    |
|----------------------------------|---|---|----|----|
| f4a982584d03a0b19862aaec111830a7 | 0 | 0 | 0  | 14 |
| 7cb16f2c4ce1b422563399a5e093533b | 0 | 0 | 0  | 14 |
| c7fcaa011a7a556ce0c4ee96f3864deb | 0 | 0 | 0  | 14 |
| ca8b20208ceba0122147d1d7015f5816 | 0 | 0 | 10 | 4  |
| 411b16e5172d43dfb88c92633472b8f8 | 0 | 0 | 0  | 14 |
| 2bfc173e3ff6802f467802dbe079a4f1 | 0 | 0 | 0  | 14 |
| 768cfb93a91c22b84650949852edf4c6 | 0 | 0 | 0  | 14 |
| f9e507378b9732432a3edf07e16ac24a | 0 | 0 | 0  | 14 |
| 5e42e24cad882f7404c89362eaf0c756 | 0 | 0 | 0  | 14 |
| 4cc51d5472b9c0ce46a120b19c127ae9 | 0 | 0 | 0  | 14 |
| 76503969b30d1bebd82c04f0624818bb | 0 | 0 | 0  | 14 |
| 79e9a1846a0e92b492d2ed6ad151264b | 0 | 0 | 0  | 14 |
| 33b8f291e00d3269b256ba54cfcb97aa | 0 | 0 | 0  | 14 |
| 10bda79c17de6863163898133a43cde6 | 0 | 0 | 8  | 6  |
| a3552d4a23c3d4f23af098fd9657c791 | 0 | 0 | 0  | 14 |
| 2b78e8bc51c8de28251e3f1d64f7956c | 0 | 0 | 0  | 14 |
| 58975f625c0df6a8830cd6c2b260283c | 0 | 0 | 0  | 14 |
| 21e2e5b2b32d693d2ece0dca40c1e533 | 0 | 0 | 0  | 14 |
| c314f4ab249b34f264dd33d75be3d8b5 | 0 | 0 | 0  | 14 |
| 9b30190136a7825f6d8f49194f0c8b06 | 0 | 0 | 0  | 14 |
| 25c3a23c8725bdf6512728b1a9372e0e | 0 | 0 | 0  | 14 |
| badf8fee6274ecab79943c2d1e41edf1 | 0 | 0 | 0  | 14 |
| 1e1aa149425fbd41c4e7e902809036d5 | 0 | 0 | 0  | 14 |
| 2578ece735f5ca0651b0dd1b8a80cedb | 0 | 0 | 0  | 14 |
| a059b2d63a552c54dd89c485335fa9d3 | 0 | 0 | 14 | 0  |
| 40c7643cf6353e98811acb9c2b2b73df | 0 | 0 | 14 | 0  |
| 369e4d5fb827cb8e10e750292c491adc | 0 | 0 | 14 | 0  |
| edf7659b8d1b343a2e46c21425c9a983 | 0 | 0 | 14 | 0  |
| f1fa0f2506a803b30273326b2db8d194 | 0 | 0 | 14 | 0  |
| 3e442838466109aca9232426e140362e | 0 | 0 | 14 | 0  |
| ed448c94a4713c8a144feec2a4312139 | 0 | 0 | 14 | 0  |
| e7a90430721e87aae17b133b7cbb5108 | 0 | 0 | 14 | 0  |
| 42b36b8cc79055b50621e09f882e3ac7 | 0 | 0 | 14 | 0  |
| a74fdcf6ddcfb83523461ac88521ee7  | 0 | 0 | 14 | 0  |
| 558fddddd92113d31e850dca6ab13612 | 0 | 0 | 14 | 0  |
| b635319e668c5413b29976e9d01402f3 | 0 | 0 | 14 | 0  |
| b39c36ab8e613a2440c834cd11be4131 | 0 | 0 | 14 | 0  |
| 05c33c60717a738a27bddd5ad06fafa  | 0 | 0 | 14 | 0  |
| 888fd24d8b337fcfaaa85c1ed9dff88d | 0 | 0 | 14 | 0  |
| 9163391805ca7a4e24be91ed4bc95fb0 | 0 | 0 | 14 | 0  |
| b33cc8252478dcf7a4829299b1f24221 | 0 | 0 | 14 | 0  |
| cea786ab39bc8a4c15c8a937e6caf2eb | 0 | 0 | 14 | 0  |
| aae9a089651141cbe817d11eaae68303 | 0 | 0 | 14 | 0  |
| 4deeb1a38eaa3d475746fb2f12ce7343 | 0 | 0 | 14 | 0  |

|                                   |    |    |    |   |
|-----------------------------------|----|----|----|---|
| f698b2d643976925c2815e4e0e94825a  | 0  | 0  | 14 | 0 |
| ff5c2cdd5bf3099d24706d958a5d7d84  | 0  | 0  | 14 | 0 |
| 401c32e3ed83578e3d7953b1a52414dd  | 0  | 0  | 14 | 0 |
| ade3c295fcad3a2782a277aac7462e37  | 0  | 0  | 14 | 0 |
| 2041027884dfff7a2ad24f3d05893c7c  | 0  | 0  | 14 | 0 |
| 283689368e0e2e0470ba04f8546df6bf  | 0  | 0  | 14 | 0 |
| d8c3e3c0658c3d7be35733a5da70adc3  | 0  | 0  | 14 | 0 |
| e8b4bd45fd49b63312e9f4dfcf9cd7a9  | 13 | 0  | 0  | 0 |
| c3bf628368dec5393a59b42c0d62ee6a  | 7  | 6  | 0  | 0 |
| aa47a5cd63f2a8bea029fa9963191748  | 13 | 0  | 0  | 0 |
| adabe1520b686c526799a970544ef5e9  | 13 | 0  | 0  | 0 |
| 2c950924ae77208bbc8b3c419241432d  | 13 | 0  | 0  | 0 |
| 3adbdc20958d08c34c9dee571b93fc4f  | 5  | 0  | 8  | 0 |
| 3744cd70beeb19a590fce7fe54cf6cb01 | 13 | 0  | 0  | 0 |
| e2d9d08da0696b96397a25bfa1ee51d8  | 13 | 0  | 0  | 0 |
| 86588e4de9c6aa683f5b9e8a98fba214  | 2  | 0  | 7  | 4 |
| d6debc67a57f2a01a544ba4d2d6058cc  | 13 | 0  | 0  | 0 |
| 6d32bf3a74a1f01217225826a17cfe2b  | 13 | 0  | 0  | 0 |
| 7ef1801d000e2aa178d706dc62994c99  | 13 | 0  | 0  | 0 |
| a635185d38318567946bc9a671bc461f  | 13 | 0  | 0  | 0 |
| e9ee3343e82c3e26515fee1dc7e7514b  | 13 | 0  | 0  | 0 |
| 4b1768eb475e99be03f0b66843c2eea3  | 13 | 0  | 0  | 0 |
| 7f239a5162d90be1d91b9cd488c482a6  | 13 | 0  | 0  | 0 |
| 0b3ca5cb47b14b2d6211e128603fc17d  | 13 | 0  | 0  | 0 |
| 3e392dc616bee67dfb7c8705ca38fd7a  | 13 | 0  | 0  | 0 |
| 1896968b5d97e4d88588a1b5f87df08d  | 6  | 7  | 0  | 0 |
| 4b0d400f79f91dcc5ed33133b36723b8  | 13 | 0  | 0  | 0 |
| 7226d566502468ffc3dae7f71937a1aa  | 13 | 0  | 0  | 0 |
| 2e7455e1f27cf151176cadf6822148b4  | 13 | 0  | 0  | 0 |
| 89d11035b600f8e08f28039ef90f702c  | 13 | 0  | 0  | 0 |
| 63bb761902498bbf38ea97542aa8c450  | 13 | 0  | 0  | 0 |
| e16b8d436fc21e003846311b0355efc5  | 4  | 0  | 0  | 9 |
| 61afe08f92eab00f2f38aec6517bca29  | 13 | 0  | 0  | 0 |
| 860ee2101446df9f01fb09a643523bec  | 7  | 6  | 0  | 0 |
| 2a588463c862b979706f79562aa90ff7  | 13 | 0  | 0  | 0 |
| 5221b809c42252e7f1f228b9d5154a26  | 13 | 0  | 0  | 0 |
| 3d9c81e65cfcfd67fccbad9ff35f86ae5 | 13 | 0  | 0  | 0 |
| 9ffbf7eee83da25999ca7985d192bed0  | 13 | 0  | 0  | 0 |
| a8a71c1119ae9a3cf0f1ff12a6e61cd9  | 4  | 9  | 0  | 0 |
| d6f5cac1dd1837809185db9c80ab9e90  | 13 | 0  | 0  | 0 |
| fd088f202cd1578dc8432eb47b07c72c  | 13 | 0  | 0  | 0 |
| 1f8e129784e206b408f58c7858999a82  | 13 | 0  | 0  | 0 |
| 9a4c72e181df7e8bb2cfb66c89c4d254  | 9  | 0  | 0  | 4 |
| 7b02da976f2134d88d91a479116b4d4c  | 3  | 10 | 0  | 0 |

|                                  |    |    |   |    |
|----------------------------------|----|----|---|----|
| 613b952a2a8dbe154f14c1a2ad6adcd3 | 13 | 0  | 0 | 0  |
| e1eb225bafb6b371067754673df1fff9 | 4  | 9  | 0 | 0  |
| 2e118c6f1f4e9dca950184e36176c1a1 | 9  | 4  | 0 | 0  |
| 4dc0862305a1187baac57dda3933c6a6 | 10 | 0  | 0 | 0  |
| 576d8580ddbc0d6c83948a6f44904344 | 4  | 0  | 0 | 9  |
| b19f9123652d4807401db23f20d26a70 | 13 | 0  | 0 | 0  |
| 163f7e954c441b414b808697079858df | 4  | 0  | 0 | 9  |
| ae8904ff77d62a1cb6b928588bd7ae02 | 2  | 11 | 0 | 0  |
| 4dcdac14b06fb68198986237adce5b74 | 13 | 0  | 0 | 0  |
| 4400fbbbef355c4d3fea7a7c93704237 | 13 | 0  | 0 | 0  |
| 0c9fb9aaa7e62770ff27540fb5def733 | 5  | 8  | 0 | 0  |
| e5ac6db05b74130b3e943c46c22c9a6f | 9  | 0  | 0 | 0  |
| 051b498337747895bf687ca60952938d | 13 | 0  | 0 | 0  |
| db9adca212e58fbe5cbeaba4081d53ef | 5  | 0  | 0 | 0  |
| 28f6725fd27d82c88d036b99af9e7351 | 4  | 9  | 0 | 0  |
| 65c936934d6cfaca6c890cb2e8b569bd | 13 | 0  | 0 | 0  |
| e8294244405b55f8facfe97ab8272e70 | 13 | 0  | 0 | 0  |
| cab694d81e84c832382ce5600bc4c93b | 0  | 0  | 3 | 0  |
| ce5feee2a77720451c617e1f75d08d2f | 0  | 0  | 9 | 0  |
| c0e9e263dc411ceee901715c39cdbd51 | 0  | 0  | 0 | 0  |
| e2329488bda12e0f50a4b91e8e4abf78 | 0  | 0  | 0 | 0  |
| 6d076f1635f6149eddad88619dad35e1 | 0  | 0  | 0 | 0  |
| d1ca2c7faf1b441ca75e5b414dba2c98 | 0  | 0  | 0 | 0  |
| 72cb485cf0010fc10970c38d27335981 | 0  | 0  | 0 | 0  |
| 11a5ab8cac8f6975541eaeca665e5b6b | 0  | 0  | 0 | 0  |
| 5e7a0ddd90361ae1cdf93b422baae304 | 0  | 0  | 0 | 8  |
| d8b22bfaee488d664e465a940a8ca617 | 0  | 0  | 0 | 10 |
| 3054195059ce9e2050baf2aedc67f445 | 0  | 0  | 0 | 0  |
| 07015f809d0afa506c1404b9a06f9dbf | 0  | 0  | 0 | 0  |
| 3a553fc5bc150b729a1a3c21f586e18e | 0  | 0  | 0 | 0  |
| b8fee354f8538ac700327ce961361b93 | 0  | 0  | 0 | 0  |
| 5da8b7e95bcddb63268ff5086e2b5027 | 0  | 0  | 0 | 0  |
| ba08b8f4dce5184232f16f8f9fa24f6a | 0  | 0  | 0 | 0  |
| c70b47ebd25c61115a1f1cccfaeb3025 | 0  | 0  | 0 | 0  |
| a69147ebae90225114f5df1506d5feaf | 0  | 0  | 0 | 0  |
| 046673b2429077c4ce17dd329b0d49a2 | 0  | 0  | 0 | 0  |
| 9141e51f573530fd780f1418f5439b7f | 0  | 0  | 0 | 0  |
| 14d068080c68712ffac5d6aded27cfe7 | 0  | 8  | 0 | 0  |
| a0f52056d0e3d31015b6794ebd9eca57 | 0  | 0  | 0 | 0  |
| b24de24fd069413796d825e179c992cd | 0  | 0  | 0 | 0  |
| ca223d8117486e173ef50bdb05fdc731 | 0  | 0  | 0 | 0  |
| ae0febd5fd32c437a20823f6715de82b | 0  | 0  | 0 | 0  |
| 4e3646d296a34ee3c0a8bff33b0e97c0 | 0  | 0  | 4 | 0  |
| 370d6f5422c0174d3be7bd446250ac5b | 0  | 0  | 0 | 0  |

|                                  |   |    |    |    |
|----------------------------------|---|----|----|----|
| 8dbe42fcd8eb30a0a8b49728687f7fb  | 0 | 0  | 0  | 0  |
| 2b60e4075f3eaabdfcc286c7ff2bf082 | 0 | 0  | 0  | 0  |
| bc80b6adb83cf7214c5019fda519cc15 | 0 | 0  | 0  | 0  |
| c982abd07b7707aa428bcb5e3cc03cf5 | 0 | 0  | 0  | 0  |
| 348377e4f3285b27802f81185f7a8b77 | 0 | 0  | 0  | 0  |
| b3d23b3c55b9a763a2f8e0f3723ba513 | 0 | 0  | 0  | 0  |
| 9e6744d59f11e26a7f6f65409196f546 | 0 | 0  | 0  | 10 |
| b34b1ce377104487fa68b0d8a22aec1a | 0 | 0  | 0  | 0  |
| 73f8a6744c072ecdf7c7d6b3f42f3447 | 0 | 9  | 2  | 0  |
| 353a1f5f2abd6004084e94d42f5a2e8a | 0 | 0  | 0  | 8  |
| 7a91aec91e4926f24c49e7bfa20f811c | 0 | 0  | 9  | 0  |
| 9e70f746f2f07da02d72d489446d5396 | 0 | 0  | 0  | 0  |
| 08664b5db1c0596e35dacc5dd0ce984f | 0 | 0  | 0  | 0  |
| f58cfb78abcdd47dff0d67d4c6e87ee0 | 0 | 0  | 0  | 0  |
| ccc0dc70aad7e2009dab17336b7335cd | 0 | 0  | 0  | 0  |
| 39b297363f9a7e5134d33fbd1f5166da | 0 | 8  | 0  | 0  |
| 1ff3d9f174e885197c6953681ac68502 | 0 | 0  | 0  | 0  |
| 438a90cfc576bdfec4abfe12ba4cf4ac | 0 | 0  | 0  | 0  |
| 03050b8effcc2563a06be84c9bfddf74 | 0 | 0  | 0  | 0  |
| 6215c8701c2520a0154192d681b0cd60 | 0 | 0  | 0  | 0  |
| 04712c3c4fc5b8ee6cd5f9e59843b52a | 0 | 0  | 0  | 0  |
| b946ad19fb695f30c8ae7650630b680c | 0 | 13 | 0  | 0  |
| 3e5a195e71a804000fb7e360c7c507fc | 0 | 3  | 10 | 0  |
| 5e76758dd010a4fd9e96ee9d48376f16 | 0 | 13 | 0  | 0  |
| 5a50802d175385463a92f6e094a20e01 | 0 | 13 | 0  | 0  |
| bb246a172baa788993105cecbce78108 | 0 | 13 | 0  | 0  |
| 9248c48c7f0f7639fc829e7a0cce70a9 | 0 | 13 | 0  | 0  |
| 1b1be2f0896c722ddca5a0a88e2501e1 | 0 | 13 | 0  | 0  |
| d12840321784079ce56b26608e740dc7 | 0 | 9  | 0  | 4  |
| 9b466791a90c1f9990902102a984a97b | 0 | 13 | 0  | 0  |
| 04b30f6ed15bac5c6d5f44ebf914dde6 | 0 | 13 | 0  | 0  |
| 60e264d04fc9ad2d6070b8aa105f7373 | 0 | 13 | 0  | 0  |
| 0c26fd30c6d3a3a129f3ce7995803b73 | 0 | 13 | 0  | 0  |
| abc0ccad0e7fdee34db8fb676c46e64f | 0 | 13 | 0  | 0  |
| 9f32a9ab18e05bcbdad6cce562729a7a | 0 | 13 | 0  | 0  |
| 5c24178b6194644e5b02d77088d142b4 | 0 | 7  | 6  | 0  |
| b49e5ab09cef6fb4bd1f5350a7ed9f8c | 0 | 13 | 0  | 0  |
| cf901a4c112c6ed789edefe2d61ad4f4 | 0 | 9  | 0  | 4  |
| aea95f44c978499243f3afeffff937b7 | 0 | 13 | 0  | 0  |
| 2386b604faeb2327544a2bad9fac4ec4 | 0 | 13 | 0  | 0  |
| 9e4f4778d01bacbb9f34724f4674399b | 0 | 13 | 0  | 0  |
| 4963a2ca47f4529bc3778306c258c438 | 0 | 13 | 0  | 0  |
| 2c6aaa42170d8579f80afddf169b67f6 | 0 | 13 | 0  | 0  |
| 9951fe98642fbe40af24a8ff504d345d | 0 | 13 | 0  | 0  |

|                                  |   |    |    |    |
|----------------------------------|---|----|----|----|
| bb5abd664859b34c1e781e7818180c22 | 0 | 13 | 0  | 0  |
| 1bc7f0e6663cd965d3969e9ecfb33e70 | 0 | 0  | 0  | 13 |
| c84efe0ed75a7e88e459275216ffde8d | 0 | 0  | 0  | 13 |
| 0f2634271c2c8617299fe4bcb4429536 | 0 | 0  | 0  | 13 |
| be3030f071589c5196c6441cdfa1e703 | 0 | 0  | 0  | 13 |
| 994156e0281f8e81a38514818c2337e2 | 0 | 0  | 0  | 13 |
| aef2146ac42b9f8ad2632fe7540f0946 | 0 | 0  | 0  | 13 |
| 1bd96d7601981bf4e631bb2da07cd626 | 0 | 0  | 0  | 13 |
| f23e298ef59498c40993050c7e531dc2 | 0 | 0  | 0  | 13 |
| ffd5d92df55142f7eaa620cde1189f8e | 0 | 0  | 0  | 13 |
| 0742c2e46df130dc4ddfcfaa8a97e87c | 0 | 0  | 0  | 13 |
| 2b93ddd82c884c50b63dbee30c8f60a0 | 0 | 0  | 0  | 13 |
| a3dafcb31947448d7e22aa6e3b3abbe3 | 0 | 0  | 0  | 13 |
| 5da355f992c06b6a6a752b0bc5687328 | 0 | 0  | 0  | 13 |
| ad846b64fb19e807c37946ba69906258 | 0 | 0  | 0  | 13 |
| 1a402fe20acfc5aefff8a30813e63ffe | 0 | 0  | 0  | 13 |
| 1ddb529fc0bc3846eef435fdd9e2d2e4 | 0 | 0  | 0  | 13 |
| 4386c5103855f28126e5fc8a6f8206f8 | 0 | 0  | 5  | 8  |
| cde1e6fcfff390dbe8f19811c317d2e0 | 0 | 0  | 0  | 13 |
| 177a744aacbfff83d8ba74ed764909a6 | 0 | 0  | 0  | 13 |
| e4b4f45d75bd5708f9d0d85164643ad1 | 0 | 0  | 0  | 13 |
| eac65acd063fbf56e3b35b2722b3a0b7 | 0 | 0  | 0  | 13 |
| c76cdea4618772034698133139bc17f4 | 0 | 0  | 0  | 13 |
| 2ded6a5d5c87355d2852e7f2e3b1f302 | 0 | 0  | 0  | 13 |
| 988ec904cfb6c0f61d03204291a453a6 | 0 | 0  | 0  | 13 |
| a2d88597c74baf41808dc3ffa2f6d116 | 0 | 0  | 0  | 13 |
| 708b8cb1bb9f66180d4c58346b072567 | 0 | 0  | 7  | 6  |
| 3804cb389c0b7d2956faa8f09320a4b5 | 0 | 0  | 0  | 13 |
| 3c285ad3f479cc27ca18a75c8b657f6d | 0 | 0  | 0  | 13 |
| 61e7cca91a877274c910c09c571647cd | 0 | 0  | 0  | 13 |
| 03aab0b278bb723dedbf68e3a941c0bb | 0 | 0  | 0  | 13 |
| 4be4df3b8f785497cd2d6b0674061d84 | 0 | 0  | 0  | 13 |
| 5def3181471858c399c478a20d18282b | 0 | 0  | 0  | 13 |
| e76892e12db4a32dd3331b8d273157a6 | 0 | 0  | 0  | 13 |
| b2bc4354578fbfe395a336040d0dff87 | 0 | 0  | 0  | 13 |
| 6d3ca4a62092b9128830bb0384acb7b6 | 0 | 0  | 0  | 13 |
| 39a3ddd15a48f9ef741f58d7c16b2cce | 0 | 0  | 0  | 13 |
| 52e7e171c345abbba2bc39198d1e4086 | 0 | 0  | 0  | 13 |
| 4961266f980c85630d47ca676211fe67 | 0 | 0  | 0  | 13 |
| 66ce9fb0fb82a8bdb114a9d6ad20bd6f | 0 | 0  | 13 | 0  |
| cd7833522e537c621c86ab41bcc61d61 | 0 | 0  | 13 | 0  |
| caa9b53f16ece10517bc10d68b83e089 | 0 | 0  | 13 | 0  |
| a808397b4567d9209cfaaf8bde965dbc | 0 | 0  | 13 | 0  |
| 02e36bd25ff7a1625e8a9116058a7822 | 0 | 0  | 13 | 0  |



|                                  |    |   |    |   |
|----------------------------------|----|---|----|---|
| 229488a4baa7ad1197be113c9002a654 | 0  | 0 | 13 | 0 |
| f9aa8f10ec9bec1338622481e1a92d4a | 0  | 0 | 13 | 0 |
| 798c1bcad313d660f1aa26c97fca4452 | 0  | 0 | 13 | 0 |
| 23b45396bd87f1f90e53094406e9fb82 | 0  | 0 | 13 | 0 |
| 6689516f093a3094d0715825861da1ac | 0  | 0 | 13 | 0 |
| 104c9c1557c69f6fedf18d498b00e2e4 | 0  | 0 | 13 | 0 |
| 7e6c8aeab45263ee7ee3fa12dabbc134 | 0  | 0 | 13 | 0 |
| 75ba93c586dcc7259c92a81ee68e31d8 | 0  | 0 | 13 | 0 |
| fad6e8862286b9cd004ce1771210a126 | 0  | 0 | 13 | 0 |
| 793277245777d3151aa124bea3ff8b66 | 0  | 0 | 13 | 0 |
| 501f494fe382d5c47ba9e9a5c8754be1 | 0  | 0 | 13 | 0 |
| 15d0c561e2fed7d6634f7972f1a56e8d | 0  | 0 | 13 | 0 |
| 569a5bd27a038efa61bd9d55e97ab56e | 0  | 0 | 13 | 0 |
| 84a7a401dc8d270c92530b96ee631059 | 0  | 0 | 13 | 0 |
| b20cfed627a0b661d722bc2fb67c8e09 | 0  | 0 | 13 | 0 |
| 27696e7f7d9f9801881d4153a4124f5c | 0  | 0 | 13 | 0 |
| 25ce57df30f676049fec03214646777a | 0  | 0 | 13 | 0 |
| 63176b4530e03994a3b3c62cf6237381 | 0  | 0 | 13 | 0 |
| ae0778e0cc2d7b3f5bd6c61204a1ff63 | 0  | 0 | 13 | 0 |
| 4ac75f58e587b6544b093fedc34b7373 | 0  | 0 | 13 | 0 |
| cf946965b44ae4ad01e5a53ffda78f03 | 0  | 0 | 13 | 0 |
| 3b089784e55a0e9c8f677039e4aefccf | 0  | 0 | 13 | 0 |
| 79786487c2b0dd8d9f9fa46a353d5682 | 0  | 0 | 13 | 0 |
| 4a189c5656011a2d4afa4f09ee3a9308 | 0  | 0 | 13 | 0 |
| 5e8823a4d09d06e9a6856ac5f33b2356 | 0  | 0 | 13 | 0 |
| a72ca40379dd8ef6e2ec3d9b1e6fff7e | 12 | 0 | 0  | 0 |
| 276da1ef99d72d41530cdd2bac201336 | 12 | 0 | 0  | 0 |
| de1f5d1c534dbc5091bd9132d07ba27b | 12 | 0 | 0  | 0 |
| 7797c3a37e685a930da5b4cca43cd148 | 6  | 4 | 0  | 2 |
| eabc580843ec1ac13a00ca4e5fe2c280 | 12 | 0 | 0  | 0 |
| 80e2dc7839543e8e8c79d843c23c8e42 | 12 | 0 | 0  | 0 |
| 2db71b4dd1abec59c775bb2c0e6a7d75 | 12 | 0 | 0  | 0 |
| bbaad615c471a96dcc3e36e7f62bd30e | 12 | 0 | 0  | 0 |
| e5cc25c8c5a26601cc5e35845def0e76 | 12 | 0 | 0  | 0 |
| c235356318b1a85c7b9c0a6a4083bfe2 | 12 | 0 | 0  | 0 |
| 45859eac04c25cf43557f4180754eb2d | 12 | 0 | 0  | 0 |
| 709e9579ff86113449973bc7c5c20250 | 2  | 0 | 10 | 0 |
| 7e9645a623585d3587e517025d99281b | 12 | 0 | 0  | 0 |
| 4a77e17a79447a8ffdc25c2856c0abfd | 12 | 0 | 0  | 0 |
| 7fbc41ee6aea47a9d441a3f72b806d1  | 12 | 0 | 0  | 0 |
| e0f0f194aadcd4b44cdcb82fbbd48d5  | 7  | 0 | 5  | 0 |
| 1b80ef4f493d0170a549d83039c730e7 | 12 | 0 | 0  | 0 |
| d67cf9392363ea2ff40316026df59ec7 | 12 | 0 | 0  | 0 |
| fafaa8d2bd118701fab12c5851e5736c | 3  | 3 | 3  | 0 |

|                                  |    |   |   |   |
|----------------------------------|----|---|---|---|
| e520204f46d0ff9e5319bb925b7180eb | 7  | 0 | 0 | 5 |
| 34772aca2c6abcc1715c385c81902ce1 | 2  | 0 | 2 | 0 |
| 0ebf8620086d37fcf9ba4258b510791c | 12 | 0 | 0 | 0 |
| b60841759ae62c5c13b39aab32156af7 | 12 | 0 | 0 | 0 |
| 6dc77024f121b7c229ca0c12e21b5444 | 12 | 0 | 0 | 0 |
| 1e75e0e9c868862f275fd6e449ee92dd | 6  | 0 | 0 | 0 |
| 928907b9b4e90f550e424afc8a7ba4b  | 12 | 0 | 0 | 0 |
| ca8a3df67294a8dc8e33232cdc623a6d | 12 | 0 | 0 | 0 |
| fd9ac9d2a72c4146d91b52dd036a7415 | 4  | 0 | 8 | 0 |
| bee05cc55cacecc4a6ea732da105987e | 12 | 0 | 0 | 0 |
| c228a553f57bb1a2b7208a7ad54644c8 | 9  | 3 | 0 | 0 |
| b6dbd062fe2feff959b5ef4e8ec68365 | 6  | 0 | 0 | 0 |
| 80f8de85b67bd2377ca51d4cd6b80e76 | 12 | 0 | 0 | 0 |
| 497e2e21c4c381b80b554ffa3a74c04e | 12 | 0 | 0 | 0 |
| 946df074c139e6cfe7a9ea89fe1a2847 | 12 | 0 | 0 | 0 |
| 75a0b40707eaa275f7b1c0c70e1bcc3a | 12 | 0 | 0 | 0 |
| 3625bcf451549b2e9f4884791a00bffe | 12 | 0 | 0 | 0 |
| 21d2b6745aa6454649b7be07bcd5730f | 12 | 0 | 0 | 0 |
| a66a4e78942baef5a39c0e91bf8a99dd | 12 | 0 | 0 | 0 |
| f9806ce64bcfaa698582027ef0e4d7d1 | 12 | 0 | 0 | 0 |
| a6890bb94bf961ee6ee2cfbd873d74ed | 12 | 0 | 0 | 0 |
| 3efd7d2d3d19c5122e25e2c1ee7d15f1 | 5  | 0 | 4 | 0 |
| fc18f3c18a8bc73465c1932fab89a29c | 12 | 0 | 0 | 0 |
| 6b3d8e75f9f23cf375e27b4335955efe | 3  | 5 | 0 | 0 |
| 2988b8c5347c5cc6c41b2a75cd59d8b5 | 2  | 8 | 0 | 2 |
| ddb48ce03e659deaf8eae0e96b06cf5c | 7  | 0 | 5 | 0 |
| b9db9babbe149cc0e1a983ca40ac530f | 7  | 5 | 0 | 0 |
| 9d509ae79a7feaae79f8d518ccd74677 | 3  | 0 | 0 | 7 |
| 417093b9c96d8c6d9ebb4d6c2ec8a93f | 12 | 0 | 0 | 0 |
| 5359496b0af0e4c13c0b63dae0f17678 | 12 | 0 | 0 | 0 |
| e3665f4b9e670d8db2fb0ab3ae03b77a | 0  | 0 | 0 | 0 |
| c4483271ae94b80da4639357bb2d3a31 | 0  | 0 | 0 | 0 |
| 3e160abe84b31e1dddd5eb2a93028f6f | 0  | 0 | 0 | 0 |
| d3796de5ac7c14a60c167e9626725d30 | 0  | 0 | 0 | 0 |
| c46eb415615596e2fe48fda9eed00e88 | 0  | 0 | 0 | 0 |
| a60a9724c73cb25999af033bd73c9fec | 0  | 3 | 4 | 0 |
| 0d2d554e1b8d8f5b64f36b7f0d3634ed | 0  | 0 | 0 | 0 |
| cc5506c83845fa84a1a0f640e15d10e6 | 0  | 0 | 0 | 0 |
| cdc4f22b2a0d3dae6091d2f0f20f1b6f | 0  | 0 | 0 | 0 |
| 059e335c312282638ef306f1dea56137 | 0  | 0 | 0 | 0 |
| 0a0d7512457464c7835a387cbd027d35 | 0  | 8 | 0 | 0 |
| 8d1f0f46986a829e020aeb146277a6a9 | 0  | 0 | 0 | 0 |
| d3839c3ed1fb864b3c34ee36b48d2ffc | 0  | 0 | 4 | 0 |
| 60446c40b85dc8aaefbf03f4a047ef82 | 0  | 0 | 0 | 0 |

|                                  |   |    |   |    |
|----------------------------------|---|----|---|----|
| 126983a11b9ed9b972e4488cbac76168 | 0 | 0  | 0 | 0  |
| 4df9ea86e419d3bfd374424030c8124d | 0 | 0  | 0 | 0  |
| 31e5fd46072d58ad1b3a661d37280772 | 0 | 0  | 0 | 0  |
| d22be396077ce3b6b800db530e3ea0d0 | 0 | 0  | 2 | 0  |
| aeb0f7b0640c92b487192b1f79773b2b | 0 | 0  | 0 | 0  |
| 94e5122f3c88dfb639531f7304e8822c | 0 | 0  | 0 | 0  |
| 70c54623ce9ea8333fadf7c66f0aa049 | 0 | 0  | 0 | 0  |
| 3ea3cef022448b7a425d43a7f6ec29ed | 0 | 0  | 0 | 0  |
| e8ce25599363888e0dd80c5c92310b44 | 0 | 0  | 2 | 0  |
| 6c0dccd5ce3c57203003c49f1b425ccb | 0 | 0  | 0 | 0  |
| c3e884a411f08ffc47072b0d927038e0 | 0 | 10 | 0 | 0  |
| 6108156b66b0f36dff320a6644b220fe | 0 | 0  | 0 | 0  |
| abe7eb96ad03bbf515d4c6e374dd4f3d | 0 | 0  | 0 | 0  |
| 63ab0190ed37ef2d772be5b2fd45a0ed | 0 | 0  | 0 | 0  |
| 716ec79232f2a0938da774c2ac5d36e7 | 0 | 0  | 6 | 0  |
| feed07ceb657e72f3d041e7e0a10020c | 0 | 0  | 0 | 0  |
| fc6d7bbadabd7bb3a88b821b9574582b | 0 | 0  | 0 | 0  |
| a9058b8298c231889547e1fe07811cda | 0 | 0  | 0 | 0  |
| 1f63f67e02fe0fc6585190740fbed7e4 | 0 | 0  | 0 | 0  |
| 2199538259d67a1ab2ce9358134326d9 | 0 | 0  | 0 | 0  |
| 1445c59c3fb24d74e78ae88f1f05f610 | 0 | 0  | 0 | 0  |
| 741f658ec1208a9b0c9f74799e04dca6 | 0 | 0  | 0 | 0  |
| 19cfe0cdae2134bcf4ecbcbe745d3cba | 0 | 0  | 0 | 0  |
| 8e224db5afea53ab763cb69b57e55760 | 0 | 0  | 0 | 0  |
| cc48428e012506d9241bf9cecd16e14a | 0 | 0  | 0 | 0  |
| 370ea35ec2124561b7b34b831f459aa6 | 0 | 0  | 0 | 0  |
| 21a3847c5fb53ee566e0bbab190f3efc | 0 | 0  | 0 | 0  |
| fa9ab0f89a34249c9208c0dbc2f8cff4 | 0 | 0  | 7 | 0  |
| b2be0d30a832926b54d0d45e80e143b0 | 0 | 0  | 0 | 0  |
| 9e8ca0198c4dc45806a6f730048c2591 | 0 | 0  | 0 | 10 |
| 49d346f2042ea286748491752aae78dd | 0 | 0  | 0 | 0  |
| af4233c34a5dc8f23bb0994ee4dddbf8 | 0 | 0  | 0 | 0  |
| b69f49780a45573e4fa28e4d56883a04 | 0 | 7  | 0 | 0  |
| 085b57799d4bc2adcd2d95d209811597 | 0 | 0  | 4 | 0  |
| a53d56b92354bd960f241c111f5c8c0a | 0 | 4  | 3 | 5  |
| da9338e3697a19adf4e8a3d22b0ec880 | 0 | 6  | 6 | 0  |
| 09c84d921388a9bf7a66572f4933b764 | 0 | 12 | 0 | 0  |
| a4d0fecea571ac8d2ac36bbe1d97e402 | 0 | 12 | 0 | 0  |
| 56c091880333702209cbd5bce044e64d | 0 | 12 | 0 | 0  |
| 5e0102cd3aae945574ea36ba7747800f | 0 | 12 | 0 | 0  |
| c4dcf85e5d7f6f9d3fdf9c1ffea6f95f | 0 | 12 | 0 | 0  |
| cb50fe4af7b70c900d2002736bee2daf | 0 | 12 | 0 | 0  |
| 0508f40f2ed7241b0bb4a6d1754297ed | 0 | 12 | 0 | 0  |
| da98862eea028e8ed4e5d85ca7cb1c16 | 0 | 12 | 0 | 0  |

|                                  |   |    |   |    |
|----------------------------------|---|----|---|----|
| f0b09a04c13188f010a2d2c16409c81e | 0 | 12 | 0 | 0  |
| cbd97fa1343ee1fefa0c4a03c09fa182 | 0 | 3  | 0 | 9  |
| 2a493d07a2552ee7362d858046c19875 | 0 | 12 | 0 | 0  |
| 8e2e4d7898bc28d1a7c0c1f1f7e4435f | 0 | 12 | 0 | 0  |
| cd485cb9433a8f7e89b5760592d0c24c | 0 | 12 | 0 | 0  |
| 848026104af59f039db1ed598f1460a1 | 0 | 12 | 0 | 0  |
| f8b40e055c48eab943ce0fc8a8de0e3a | 0 | 12 | 0 | 0  |
| 87ac6ab0fed8595e8f3fb1212eaec82e | 0 | 12 | 0 | 0  |
| 18f91f64099b8e74444e4eb6693178c8 | 0 | 12 | 0 | 0  |
| 3eef29bf5da817a3285fd9cbd7c0fd8c | 0 | 3  | 0 | 9  |
| 4c2a81201e064c9f586614d0cac40c31 | 0 | 12 | 0 | 0  |
| 5733efa0617f4cb97a37805c329258da | 0 | 12 | 0 | 0  |
| 53a910348df97ed2d355e9543106ff8d | 0 | 12 | 0 | 0  |
| fedcdf452f80a4848e5dc42ad93d9bb  | 0 | 2  | 0 | 10 |
| 48f06096597d991bb2c5ac8d0449fffd | 0 | 12 | 0 | 0  |
| 34c34f64c1a16f2d41519b0903b6ba0c | 0 | 12 | 0 | 0  |
| c47205a3edd29c231e8f18e6cc71e66c | 0 | 12 | 0 | 0  |
| e710f69d3a8a183875c62b07be0603a4 | 0 | 12 | 0 | 0  |
| a7d69cb26fc8fa5285f6304bd429ec9e | 0 | 12 | 0 | 0  |
| 2886c7c2b0a6702ed0ccc38c9ccceb14 | 0 | 12 | 0 | 0  |
| 8f496f9c3ce6dad73994249898b4e7d  | 0 | 12 | 0 | 0  |
| cc7e2f01fe0abbf8b60e3aea80682aae | 0 | 12 | 0 | 0  |
| 00031c03199a18af50d37464ae9fbfea | 0 | 12 | 0 | 0  |
| 9893393d3ccf503099e62b898cc15662 | 0 | 12 | 0 | 0  |
| 31e94063af580fc193ced42eee6b25ec | 0 | 12 | 0 | 0  |
| eb4c865ab739073cfd78e29f2a485133 | 0 | 12 | 0 | 0  |
| 1600d44c589a4036e19a4e393aa061df | 0 | 12 | 0 | 0  |
| bcd31045e023d72c6609763c5bc26d9b | 0 | 12 | 0 | 0  |
| fc88a42b6a682583891bef504b286ffb | 0 | 10 | 0 | 2  |
| db2a896e6691355d5cb4d158b1de2f87 | 0 | 12 | 0 | 0  |
| 8c388664a369f989e586349dd5e4f3f2 | 0 | 5  | 7 | 0  |
| 00c867372e786759080c78d9ea306f06 | 0 | 0  | 0 | 12 |
| b2cc8c2686009fa28acd69a1129aabce | 0 | 0  | 0 | 12 |
| 520b414eae1511e394a1fa3afb29120a | 0 | 0  | 0 | 12 |
| ea0171479aba9c761efc4650ab83185a | 0 | 0  | 0 | 12 |
| 4627fd3596178454765523b8b08ccfd1 | 0 | 0  | 0 | 12 |
| 2ac1cccb682dc5233adfb621346026ce | 0 | 0  | 0 | 12 |
| fb6f21120484a2b90da0ce31f2f62516 | 0 | 0  | 0 | 12 |
| 0869a446d65a194eb275c72d17635114 | 0 | 0  | 0 | 12 |
| 5e60b2a7016e2d3c6e9614d0e27f342b | 0 | 0  | 0 | 12 |
| 5c9735bee91f5897357f7824d58d686d | 0 | 0  | 0 | 12 |
| 522c538e24de2e05164dbcd4c78e6d83 | 0 | 0  | 0 | 12 |
| 590fc77003a62f8843d187b65d46d2ac | 0 | 0  | 6 | 6  |
| ed4aebc6b87d971f391b9a2d4f2300f7 | 0 | 0  | 0 | 12 |

|                                   |   |   |    |    |
|-----------------------------------|---|---|----|----|
| 1a2539b8d52d76170f2024ce91eafc24  | 0 | 0 | 0  | 12 |
| 0c1a4f31dc7cc1bb2e984fd46a515dff  | 0 | 0 | 0  | 12 |
| 545bca46af1baa9607b93128f7c6dc21  | 0 | 0 | 0  | 12 |
| a3c2c76f8c3a15010273a0e9ba5da854  | 0 | 0 | 0  | 12 |
| ac91a99aeb9785db269d1a0f7ece7062  | 0 | 0 | 0  | 12 |
| 18d5ba4d0e66660ba4ccf860555c8cb6  | 0 | 0 | 0  | 12 |
| c1fa50f8a5100e3c2e832760f6f31c4f  | 0 | 0 | 0  | 12 |
| b8285a2be7395c32553502392acefec6  | 0 | 0 | 0  | 12 |
| 3f071b03d55f0f4e1429d512a73348cf  | 0 | 0 | 0  | 12 |
| b721122fbd4aececed6b3cd43fb7f3d2  | 0 | 0 | 0  | 12 |
| f179cee4d092c867e3169ec4ccda76fb  | 0 | 0 | 0  | 12 |
| 2dc3b6f74f7b5fcede2fd584243b015f  | 0 | 0 | 0  | 12 |
| 5c37115bc1639efc9a74999561dddff8  | 0 | 0 | 4  | 8  |
| 0d99535432c02bed57494d29d986e8ba  | 0 | 0 | 0  | 12 |
| 3582bfac7c1c2193b170a4f184340e93  | 0 | 0 | 0  | 12 |
| fbaa1f6a533814e1ce91dbb9be98d7bf  | 0 | 0 | 0  | 12 |
| 0b76aec0f303eb29e78ad823bae53177  | 0 | 0 | 0  | 12 |
| 0329113a40f7976dc6a03884ec27388f  | 0 | 0 | 0  | 12 |
| 067340245e955b1a9841e6383f9aa967  | 0 | 0 | 0  | 12 |
| f7986201b66ea40b8a3876bac7c47d2f  | 0 | 0 | 0  | 12 |
| 9b4f80930129be6f4bfc949da56416a4  | 0 | 0 | 0  | 12 |
| be235080be4d29435d4178907df3c8db  | 0 | 0 | 0  | 12 |
| 710bf757a104c4079e94dc15d8c3550a  | 0 | 0 | 5  | 7  |
| a4835cf74d24c2410cf19e0d686a47c8  | 0 | 0 | 0  | 12 |
| 395b832901390fa2ca54c3bb445fb096  | 0 | 0 | 0  | 12 |
| 87f6ba8641e2eb2871abf1229e17fda2  | 0 | 0 | 5  | 7  |
| 3e6f185997b324861e1f3d9198b7acab  | 0 | 0 | 0  | 12 |
| 94b2df047e59f04de314e7cef253ca48  | 0 | 0 | 0  | 12 |
| 91e9fc0342b4091ff6b251cecc2e80a3  | 0 | 0 | 0  | 12 |
| 6b48f0706a839df9a1dc68755b23501c  | 0 | 0 | 0  | 12 |
| 57f2b8a94f43d2f5a8526e04a5ee822c  | 0 | 0 | 0  | 12 |
| e104d7f2ebc7f312cba65d526b6095df  | 0 | 0 | 0  | 12 |
| debfe03dd6f4a939a0fca56821d0e9a2  | 0 | 0 | 0  | 12 |
| 5ba132f748bbe95c7a83a4a650b8b10   | 0 | 0 | 0  | 12 |
| a4d08b7d0cc56dd322563f3fe2250cda  | 0 | 0 | 6  | 6  |
| c769dc1709c04e6ade8e9afefa877a45  | 0 | 0 | 6  | 6  |
| 9e5bfff14f91236d29bdf460b7d34cd2a | 0 | 0 | 0  | 12 |
| 4b891fe71f4c6168e3e9e7c7340bf48d  | 0 | 0 | 12 | 0  |
| 168ab6dd0dc826f9c5f7d027cf24a0df  | 0 | 0 | 12 | 0  |
| e557f5545e323ea31149e29c01487407  | 0 | 0 | 12 | 0  |
| 2f9266542e29d3b46b423a39c5543011  | 0 | 0 | 12 | 0  |
| 1e5ea85bdec1e4781235505b701340c4  | 0 | 0 | 12 | 0  |
| bf7cad167b490ddba282aa511b5551f8  | 0 | 0 | 12 | 0  |
| ada7e46b8106c167f263992f6e12b705  | 0 | 0 | 12 | 0  |

|                                  |    |   |    |   |
|----------------------------------|----|---|----|---|
| 6d12feddda4d7708f87b7375098a7130 | 0  | 0 | 12 | 0 |
| 06b6113b5edf462ee70d816b9ff39dd5 | 0  | 0 | 12 | 0 |
| 98740ff0b64efbae5e51d9560abdf47e | 0  | 0 | 12 | 0 |
| 195477459e74d8eaf1a97d01027d1bbb | 0  | 0 | 12 | 0 |
| 56b48002b655b0a1b7f2cb462c7011d5 | 0  | 0 | 12 | 0 |
| 76fb6c0b28c5bfedb38642f08c62f320 | 0  | 0 | 12 | 0 |
| f5f017a8562f3636adfe3842a197b586 | 0  | 0 | 12 | 0 |
| ed02678027564f2299c716b510d0e6fa | 0  | 0 | 12 | 0 |
| 44d2633aee35759e605f4815fd99e90a | 0  | 0 | 12 | 0 |
| 18c7b9842f480b07dd5245842c5adb12 | 0  | 0 | 12 | 0 |
| 221b860d91a67f7ad8c03e4aabebcfa2 | 0  | 0 | 12 | 0 |
| b2c87e96b773fd9a7f2791a9082b31fc | 0  | 0 | 12 | 0 |
| 9582b29b8435e73e0bd3f574cb9d7ef2 | 0  | 0 | 12 | 0 |
| a999ff3c2efalbe39542c6fb821fafal | 0  | 0 | 12 | 0 |
| dc18c81a497dcda822cc787d69f66f5f | 0  | 0 | 12 | 0 |
| b5409cfd1921f94ffd76101077e78513 | 0  | 0 | 12 | 0 |
| 68156d1ce9f0aa57376e94e7e0d7136a | 0  | 0 | 12 | 0 |
| 4410455da96313502a5465e28f33bd31 | 0  | 0 | 12 | 0 |
| 82fc89af98c0a667dd96c4e31dd74ac5 | 0  | 0 | 12 | 0 |
| 33c8510b66ad13ece3a4389153cd1ecf | 0  | 0 | 12 | 0 |
| 56048fd57c6a0b7df8ec2b29c7efa8b9 | 0  | 0 | 12 | 0 |
| 12ced8e501e53112b6ea5106295b1203 | 11 | 0 | 0  | 0 |
| e4d581a68c3fb6d37510117232770149 | 11 | 0 | 0  | 0 |
| a3b9afab457c0a4cecc4cc996d6d7937 | 4  | 0 | 0  | 7 |
| d69ae8f9cf77149af8cd99d33f6386a3 | 11 | 0 | 0  | 0 |
| 959cb6298234faa8f0fab3f0f3d90e5b | 11 | 0 | 0  | 0 |
| ce8041a9c241d4194ebb46bda9fe1d2c | 11 | 0 | 0  | 0 |
| 704236cee9ff76f345cad2ce69f3c6b5 | 5  | 6 | 0  | 0 |
| 68b4d3f4ba814b1098b8628c77e8dd83 | 11 | 0 | 0  | 0 |
| e20070ad9cc7c8b088f290ad386ab6ff | 11 | 0 | 0  | 0 |
| 1af51278a020e49da98d66eb69a3735b | 11 | 0 | 0  | 0 |
| f48f3e3869ca6fbb0fc5cdf37c2e09a3 | 11 | 0 | 0  | 0 |
| e28804b9219897b27ade18cec3a65d39 | 11 | 0 | 0  | 0 |
| 401c231538a1f24bafcef4261c345f31 | 11 | 0 | 0  | 0 |
| ab69bced2a5591db340769de6621d8b5 | 11 | 0 | 0  | 0 |
| c7186303b3ee0337ed27ad9183c7bf82 | 8  | 0 | 0  | 3 |
| 76e72d858816572f535b6f50a10f4073 | 5  | 6 | 0  | 0 |
| 35ac3305143e177003825d4968a19f88 | 11 | 0 | 0  | 0 |
| aca678a49dfb3e26bc7922cf6a7a1372 | 4  | 7 | 0  | 0 |
| 8ca49ab256dc438f738cd267ebe92265 | 3  | 0 | 0  | 8 |
| 5152095b4402c4f4c22004b7874b345e | 3  | 8 | 0  | 0 |
| d96bde7d1265549505b611852b8f8634 | 11 | 0 | 0  | 0 |
| 4c98216c6418eeb656fafa67c11c6da8 | 11 | 0 | 0  | 0 |
| feb62a9c7a7fee2e47d85d80c0a36b86 | 11 | 0 | 0  | 0 |

|                                  |    |   |   |   |
|----------------------------------|----|---|---|---|
| 64f44e70381238786998f5464008ad6b | 9  | 2 | 0 | 0 |
| 97c71281ce350afb1851569f09f132e2 | 11 | 0 | 0 | 0 |
| 8afc7222585d5a57b2d253c729e96eb2 | 7  | 4 | 0 | 0 |
| 3c2f254d2f8ad241978adebf2cac6600 | 11 | 0 | 0 | 0 |
| a2d88ddfb5a08065a1640331f25caa5f | 2  | 0 | 0 | 0 |
| 4c8cd2ee87bfa0286d5a83f8652f8ffc | 6  | 5 | 0 | 0 |
| 4d8b3eb527e7bc220fb13a2676e183f1 | 11 | 0 | 0 | 0 |
| e16c93a21281e415bc411a92a3e031d6 | 11 | 0 | 0 | 0 |
| 01fbe88ceba1cfe362bb61cf08010111 | 11 | 0 | 0 | 0 |
| 5b0a8388b96dc53f190737ba2e8414a7 | 11 | 0 | 0 | 0 |
| 9c429e98cfd4453ad6ce1c7f28a652b  | 11 | 0 | 0 | 0 |
| 6808886810f05ee3b593ef2a3288f226 | 11 | 0 | 0 | 0 |
| 0c1574132a72f9a63bd693db89a4a055 | 11 | 0 | 0 | 0 |
| cd177e156b7eb40deda96ea319e29ac4 | 3  | 0 | 4 | 0 |
| 4ddff8f198c8e26457c5cf4a7d46fc86 | 11 | 0 | 0 | 0 |
| e9172db9c40fc87b2968912aa1258d0b | 11 | 0 | 0 | 0 |
| b71218eaa99e62a9669422512b20706b | 11 | 0 | 0 | 0 |
| c861350ed7a80626887e2bf087e84dfe | 11 | 0 | 0 | 0 |
| 97cfee573ce3fa5148f74bf0fee8e45b | 4  | 0 | 0 | 0 |
| 39b74187503bf26c17b1eef7e2486f7e | 0  | 0 | 0 | 0 |
| e63d4490f4ac9219c43efd2fea76717e | 0  | 0 | 0 | 0 |
| dc2f672520a7fb34d9f1730632be74b9 | 0  | 0 | 0 | 0 |
| 795ab86a1093f60439f6d8bbb923d8c8 | 0  | 0 | 5 | 0 |
| 021973b08d9876bd6696713654e8de66 | 0  | 0 | 0 | 0 |
| 7f312bf821b7482ad6ba5e8af134d032 | 0  | 0 | 0 | 0 |
| 60937747d911b4e3dd7c9ef55ca336ff | 0  | 0 | 0 | 0 |
| c17eeba0cb71db9e5061ef9b4b8500f6 | 0  | 0 | 0 | 0 |
| f70d665f662d6f72905764f1a66a7023 | 0  | 0 | 0 | 0 |
| 44682b8442833589dcd91b970863fcdb | 0  | 0 | 4 | 0 |
| 957d4dcb2547a085c054f2f838f434ae | 0  | 0 | 0 | 7 |
| 3715b875f050bab5798f92cacabd4829 | 0  | 0 | 0 | 0 |
| 24a043f9838bf25625fc3640de5e54e7 | 0  | 0 | 8 | 0 |
| 4fb630fa37171b07c32c7aa3c55b89c3 | 0  | 0 | 0 | 0 |
| 392f233ecc64cf823db9265a7cf98bb3 | 0  | 0 | 0 | 0 |
| e4b25e8bed78ad03b7df800bbb9dce14 | 0  | 0 | 0 | 0 |
| ad257838dfa4c5fed5344243397c860b | 0  | 0 | 0 | 0 |
| a920787adb320c91cb28178346c61331 | 0  | 0 | 0 | 0 |
| ae5f4bab441570854c710039018467ea | 0  | 0 | 0 | 0 |
| c825a9eba617ffa252ebcac55263babe | 0  | 0 | 0 | 0 |
| 9eef13febe907da2a2cdca472c0ff8e9 | 0  | 0 | 0 | 0 |
| c8304d4fc849e83c312f3eb60b53c100 | 0  | 0 | 0 | 0 |
| 80eec4c6cb5739224095a0d8589e3a97 | 0  | 3 | 0 | 0 |
| 71d68eb11452f747d1f9dc7198038f80 | 0  | 0 | 0 | 0 |
| e5ba4b4ef166e5f155801a6e4686817c | 0  | 0 | 0 | 0 |

|                                  |   |   |   |   |
|----------------------------------|---|---|---|---|
| 79d8b95d12416c9a966425f875b859d8 | 0 | 0 | 0 | 0 |
| 0e2b7ce3c36dcc38b7c3a5c9e0c492be | 0 | 0 | 0 | 0 |
| 9e055ec4873cdb1417d935d6eb4daf18 | 0 | 0 | 0 | 0 |
| 77049d75f92fc520bc58d4f5e9f1335c | 0 | 0 | 4 | 0 |
| 1196da883470aaf09f63876295f300cc | 0 | 0 | 0 | 0 |
| 8c175d288a42861c0a20603c90b1f014 | 0 | 0 | 0 | 0 |
| 1504ab7156286297143c1ba458f32e73 | 0 | 0 | 0 | 0 |
| 858d07ee58564893cf0ccde5032b7b67 | 0 | 0 | 0 | 0 |
| 7f0750b7a3189348e8b4e10bf09250b3 | 0 | 0 | 0 | 0 |
| 7cbb18a66ab3db0e8a07f73f65a9c3c4 | 0 | 0 | 0 | 0 |
| 12295f9bf552fa947e724d0f6d2a2ca2 | 0 | 0 | 0 | 0 |
| 141d034d579f29b9fb16a7231986ec2e | 0 | 2 | 7 | 0 |
| 7d002fe887ccde80191d8cec91b8b237 | 0 | 0 | 0 | 0 |
| e378527f7da249492329fb7a60a99808 | 0 | 0 | 0 | 0 |
| 19ff3597a50314ccb03222a3426399fe | 0 | 5 | 0 | 0 |
| 26e096ee6b15ed99983a7eeaf487c613 | 0 | 0 | 0 | 0 |
| b2f3c4fd7c45f78162e1f33af463389e | 0 | 0 | 0 | 0 |
| 5b4fa0b844327c6ffe6bb6d014991567 | 0 | 0 | 0 | 0 |
| 2ebfdb05b0663de8e37950f300a1bd51 | 0 | 0 | 0 | 0 |
| b88ae9d790e6001f794e7c8de716c607 | 0 | 4 | 0 | 0 |
| 48fead0cb22ecb267ee736b6b776b44e | 0 | 0 | 0 | 0 |
| b5ec5e37488cb28990ae7953af232649 | 0 | 0 | 0 | 0 |
| 70c7496f6ebb4fd334e2bb31db772e62 | 0 | 0 | 0 | 0 |
| 32d07403c5970017742b2a2173157faf | 0 | 4 | 0 | 0 |
| 6e029c84bac3a0a3782ef72f0289b1a0 | 0 | 3 | 0 | 0 |
| 18beca4b14f2e57c3d24171883168a9d | 0 | 0 | 0 | 0 |
| 83ddaaa95a46087748d23e381ad3e096 | 0 | 0 | 0 | 0 |
| df1f4e626dd23516e7f342905b2b7273 | 0 | 0 | 0 | 0 |
| 78bcaed4c1c9208b58a5e70a02bb502b | 0 | 0 | 0 | 0 |
| f1f3f50fd2f912a90c6ca52981e0dc40 | 0 | 0 | 0 | 0 |
| 1b2c0ab9f9e4ee6322b5f8430d070a1c | 0 | 0 | 0 | 0 |
| 1fb9f181358e903f2ea567c9b38ce23d | 0 | 0 | 0 | 0 |
| 931896ed1d65e8084e2a123c640d531e | 0 | 0 | 0 | 0 |
| 4313fa6a67b4e21dcea25f11172c0065 | 0 | 0 | 0 | 0 |
| a2ef41885ffee484da84e8d8f945eb1  | 0 | 0 | 0 | 6 |
| bf32e19991bee2792a28bc38ff43d567 | 0 | 0 | 0 | 0 |
| 95093d3a3ca47bb8f9bd922eebe0f408 | 0 | 0 | 0 | 0 |
| e06ab6a9ce76eff3df8ebe9be0094042 | 0 | 0 | 0 | 0 |
| d5d50d26c11dd175b69c253784cc0b15 | 0 | 7 | 0 | 0 |
| 1b3ece8e6bb497992ee8824f567fc287 | 0 | 0 | 0 | 0 |
| 3720595ad80a9d71d9e7d2f3e4bad21c | 0 | 0 | 0 | 0 |
| b5b69d27042576fab73ea48229fdea23 | 0 | 0 | 0 | 0 |
| b12fef7e354b5397d07a2cf6c80aa991 | 0 | 6 | 0 | 0 |
| 8bfe2bdca8b1c8fde9bb3b00892f7fad | 0 | 0 | 0 | 0 |



|                                   |   |    |   |    |
|-----------------------------------|---|----|---|----|
| 9055ab8e054f7f780fee244d8f55f8be  | 0 | 11 | 0 | 0  |
| 9af51671a10e95c0d663119a8ccdb169  | 0 | 11 | 0 | 0  |
| 534be9e6a6380013cd5e219ccb2ce6d7  | 0 | 11 | 0 | 0  |
| 47769d08037e002608add210512b7902  | 0 | 11 | 0 | 0  |
| 179cff50bfbcb8d3ffb0dafc0c1b5e5bc | 0 | 11 | 0 | 0  |
| 381498786b01f107573196590e2b3454  | 0 | 11 | 0 | 0  |
| 1e00ec4e9bf12d62b73c00c1d5dbcb99  | 0 | 11 | 0 | 0  |
| 8161f65e67fb3118449bace06d6ad5a0  | 0 | 11 | 0 | 0  |
| ec2f8ac3a9cccad0cc27812a22310f51  | 0 | 11 | 0 | 0  |
| be3eaf60d6266b710029e81f954a0b23  | 0 | 11 | 0 | 0  |
| 3e5eec7f59bfe4b73e808c84de1f0343  | 0 | 11 | 0 | 0  |
| f925611c3ab3075df679e41e8e16db3f  | 0 | 11 | 0 | 0  |
| 368a19cc64ef238cfdc7bffcdfef5fc8  | 0 | 2  | 6 | 3  |
| 84f60a1e1e0a79e98f7bc29166a173af  | 0 | 11 | 0 | 0  |
| 7f4cc87e78284285c0eb5336df953f12  | 0 | 11 | 0 | 0  |
| add84423e77d809ed9639b9b66b02997  | 0 | 5  | 0 | 6  |
| 9e929209553f8d18b8c753a009ac6678  | 0 | 11 | 0 | 0  |
| cd84b9f05fd6ad77f35f71f77f0ecd56  | 0 | 11 | 0 | 0  |
| 3bf7cd0f4c347af26c49ee8f21a640ef  | 0 | 11 | 0 | 0  |
| 72a433d1699b321cc19ab2e3b1d45a1f  | 0 | 11 | 0 | 0  |
| dc2d7bd34efce341ec4a156dcfe09c60  | 0 | 11 | 0 | 0  |
| 6897c85f04499351aa5bcfac73d44d79  | 0 | 11 | 0 | 0  |
| afb889321bae66c32dc1c40b43a0bc82  | 0 | 11 | 0 | 0  |
| ded89a390fb8b7670160511dc7759273  | 0 | 11 | 0 | 0  |
| 009c39d86374adae4002efc686a37248  | 0 | 11 | 0 | 0  |
| 1a87c360db0d270cb1f05dadd5ab7651  | 0 | 11 | 0 | 0  |
| a9f2cd1d13b4158482c98792b62c1275  | 0 | 11 | 0 | 0  |
| 67881eaa4661025e0409df5a1ab4634c  | 0 | 3  | 0 | 8  |
| a8d20d9c5617c947f396b401b378548a  | 0 | 11 | 0 | 0  |
| 83fbb41ed8c73419da66bfc290318633  | 0 | 6  | 0 | 5  |
| 8b3a9e45bd9ad6eb93e3459a57a9792d  | 0 | 11 | 0 | 0  |
| 2421e77a324935e756a8184b43fd3062  | 0 | 11 | 0 | 0  |
| 2e9d0f6aed572099164855ac430e9bd3  | 0 | 11 | 0 | 0  |
| d07a6b2a2e4554adb8903173441326d4  | 0 | 11 | 0 | 0  |
| af7ce29f928b317c0bd7a15325d65d41  | 0 | 11 | 0 | 0  |
| a073af2e04cb54431a61dc7c5f1fa5a3  | 0 | 11 | 0 | 0  |
| 85d61a70acb47fc167ff5bdf1d5ee4ea  | 0 | 11 | 0 | 0  |
| 82994f12052b745ec9a3007459b96662  | 0 | 6  | 5 | 0  |
| f2ee3f78e4f81233eb19f7ecda7d7697  | 0 | 11 | 0 | 0  |
| 32b198786e03c66dc41bad5b1591e98c  | 0 | 11 | 0 | 0  |
| 2198e193aa285d3fc9819b3c17c6bb4f  | 0 | 0  | 0 | 11 |
| cee947a6dfb1af6377728b21753feec7  | 0 | 0  | 0 | 11 |
| 2338f417b39dec81d7525ea80d219347  | 0 | 0  | 0 | 11 |
| 777206b39702f801a0485b8755d3f850  | 0 | 0  | 0 | 11 |

|                                  |   |   |    |    |
|----------------------------------|---|---|----|----|
| f96aa815888608d98f10f7ec5313a156 | 0 | 0 | 0  | 11 |
| 99265c6fd3aec346e03fe5b7d2dcbe6b | 0 | 0 | 0  | 11 |
| 70470f1bb1380d7d75ed6a38000416bc | 0 | 0 | 0  | 11 |
| 1e5add2db70fdf2f582f90086d3a6c0  | 0 | 0 | 0  | 11 |
| 41bb370845c20a9192c0a328edc743bc | 0 | 0 | 0  | 11 |
| 2cf833996ba3b15a483f81074a7fd6ad | 0 | 0 | 0  | 11 |
| f22d6d2ecf8be1bf0a896ed37f339803 | 0 | 0 | 0  | 11 |
| b345cb99a14ac67bd7ac2e4847ec9455 | 0 | 0 | 0  | 11 |
| 60186a88a2e7cabf77d482f83092e7ac | 0 | 0 | 0  | 11 |
| 487276492877a5081d3bd41208ce86bf | 0 | 0 | 0  | 11 |
| f0a6411a02974e9e9f15c97a39dca38f | 0 | 0 | 0  | 11 |
| 22475685e319d13edfeacaf15ce0f913 | 0 | 0 | 0  | 11 |
| 710feccc7d246cea7797e6053559e81f | 0 | 0 | 0  | 11 |
| 10f0fd9bb2486347dc5da2ade3f25c56 | 0 | 0 | 0  | 11 |
| 53409c962ec8b17b9b9b943d1822c061 | 0 | 0 | 0  | 11 |
| 5dcee4584b7918491054f7ad507413ad | 0 | 0 | 0  | 11 |
| f4fac40f823c7dc59605376545dfe8e6 | 0 | 0 | 0  | 11 |
| cf69b36f8ab2f366b7b32a97c232431b | 0 | 0 | 0  | 11 |
| 1dcdc664308d86d22ef0bb103725c514 | 0 | 0 | 0  | 11 |
| a2d22c34798351e556b57b877c51e529 | 0 | 0 | 0  | 11 |
| 71f3076abaf6383d17a40738166fa8f0 | 0 | 0 | 0  | 11 |
| 304dbb0c7b8ced9dd57f6e8ba053829f | 0 | 0 | 6  | 5  |
| a8cb342b3548c14e4e359b684642e37c | 0 | 0 | 5  | 6  |
| c302c19ad29e4b98fddcbb72e99384ca | 0 | 0 | 0  | 11 |
| 70592c71f82c66cecec6765ea4feb556 | 0 | 0 | 0  | 11 |
| 2b894f40d0bcd95bd3a404fe5da6773f | 0 | 0 | 0  | 11 |
| 274ee6a4f9ac2e32b36b2441f6e70d58 | 0 | 0 | 0  | 11 |
| 823ae4e547b8bfd395746c8768ac0aac | 0 | 0 | 0  | 11 |
| b795115a7af69a733333b41c50ed6bf0 | 0 | 0 | 0  | 11 |
| f2a699ba5f359fac01bfbc4047ccf888 | 0 | 0 | 0  | 11 |
| 98df2792b09bc9fcc5462a550521a0f9 | 0 | 0 | 0  | 11 |
| 1b5a526677efc68ef158dd651f919f84 | 0 | 0 | 0  | 11 |
| 8e40318d034052e007d41a9485bf473d | 0 | 0 | 0  | 11 |
| 2587ccb5e97ddb730630436053ddf2dc | 0 | 0 | 0  | 11 |
| 42507966c9dc661f18dc2d041a56c1f9 | 0 | 0 | 0  | 11 |
| 24b51249892bc7221cd924fed3b738b1 | 0 | 0 | 0  | 11 |
| 6fee8ea5c5d83d80fa551997dc33cd78 | 0 | 0 | 0  | 11 |
| 0f0434f48352c2007dd06ec2c813b223 | 0 | 0 | 0  | 11 |
| 7f2076e620f2836d8ebe96e4f2274313 | 0 | 0 | 0  | 11 |
| 73b11f2736831555e273ba13e3050f95 | 0 | 0 | 0  | 11 |
| 9cf726ee42e0e205a6d9cd7222e09d3c | 0 | 0 | 0  | 11 |
| 8b636c3bd71c3c99b8adcae0209f5cdc | 0 | 0 | 11 | 0  |
| ef735cbd4fa4b8ec9261638e625abcc8 | 0 | 0 | 11 | 0  |
| 3dfbf0437e4236a48ee0ade7eabcd78b | 0 | 0 | 11 | 0  |

|                                  |    |   |    |   |
|----------------------------------|----|---|----|---|
| ea18eb024112d972054e73ad37fa9add | 0  | 0 | 11 | 0 |
| d0f13ecc9ae9db32004372713dbb6682 | 0  | 0 | 11 | 0 |
| 90b2a50f4f10849d3f7a1b823046b9f4 | 0  | 0 | 11 | 0 |
| d3fbdcaf62da3d1aa5b73d519f6677dc | 0  | 0 | 11 | 0 |
| ce17a7668337f3651cdf97a00a8a20b5 | 0  | 0 | 11 | 0 |
| 5783333a35dac7ad33bd6e7514991665 | 0  | 0 | 11 | 0 |
| d941fa9b019f08ccddb31f17489352d  | 0  | 0 | 11 | 0 |
| 6aed1dd910a126a89ea81dfdeed35581 | 0  | 0 | 11 | 0 |
| cdf64aa51aca44251a44873ccd7d191c | 0  | 0 | 11 | 0 |
| 8228da97139a950b3683bf140c6a0959 | 0  | 0 | 11 | 0 |
| 74c84f353adc7481ee4e37d31a9d6a22 | 0  | 0 | 11 | 0 |
| 5fdf6c75e4c2ee7d10ad71336ff703ef | 0  | 0 | 11 | 0 |
| bd50eb478314a1d573dd5bb4e5239ed2 | 0  | 0 | 11 | 0 |
| d0590c5ff3517b3a4189b3bf575c2d97 | 0  | 0 | 11 | 0 |
| de06f5ea20b96aa989b422a9e802d5dc | 0  | 0 | 11 | 0 |
| 6fd9a759700c646daa61dd40743a8853 | 0  | 0 | 11 | 0 |
| b0b03667297a2e80c01e395cf8cd7fd3 | 0  | 0 | 11 | 0 |
| 5b1a656aade57792ea65e332bc7f5aff | 0  | 0 | 11 | 0 |
| 14628f55182c75d420aa93b4fd89d6e6 | 0  | 0 | 11 | 0 |
| 3777486647af7c6593b59614bd723595 | 0  | 0 | 11 | 0 |
| 6ec861b9435e552f57374e4e2528aaaf | 0  | 0 | 11 | 0 |
| fd5e236ee28ca01430d9c4c65b8d960f | 0  | 0 | 11 | 0 |
| cd01f85e07774a3f9ffaafb16e65e840 | 0  | 0 | 11 | 0 |
| 35a7ea400dfecb6681f706a10c01f2f1 | 0  | 0 | 11 | 0 |
| 0add42821e7097764618839edf242371 | 0  | 0 | 11 | 0 |
| efcaa23e914bea0e8e618f9e9515dc76 | 0  | 0 | 11 | 0 |
| 9af9ff572a71472e2ceeb54f11dfe110 | 0  | 0 | 11 | 0 |
| f92e82fdc50b2604150b2978969c61ab | 0  | 0 | 11 | 0 |
| f2663cf2b5beba8d53e702833d22f6d1 | 0  | 0 | 11 | 0 |
| f5194ab4467363e88ebb30e70cd073c3 | 0  | 0 | 11 | 0 |
| 0f34a9223412f7bc35f204f8244974cb | 0  | 0 | 11 | 0 |
| 2d2ed5657b5ab31d044b97483ac11601 | 0  | 0 | 11 | 0 |
| 4ec57a539a5ea1708ece6cc1675be2e1 | 0  | 0 | 11 | 0 |
| bc4154e3872f5fc8cb455c6405e49c21 | 0  | 0 | 11 | 0 |
| d8a62c3a49148dd1ed47fd29c4c259b0 | 0  | 0 | 11 | 0 |
| 01bb457151f1a1c6991968ddc8d12f28 | 0  | 0 | 11 | 0 |
| cc9ccce366d25244a451892f96e34afc | 0  | 0 | 11 | 0 |
| fdd34158bd533fd8b819c6174669f278 | 0  | 0 | 11 | 0 |
| d4f166b6a9ce85a0c9ebcfc1f540ab30 | 10 | 0 | 0  | 0 |
| 67079139be8addf9dee0e4cb69bedbfb | 10 | 0 | 0  | 0 |
| 6fbbd102c6b6dab7cb56dae6121e730e | 10 | 0 | 0  | 0 |
| 40913331240fc8ca2f377060ec2680fe | 10 | 0 | 0  | 0 |
| 169d9efd873991dbfd73a7495af716e5 | 10 | 0 | 0  | 0 |
| fb8f9201fbfafaae48d2a3858e3ef14c | 10 | 0 | 0  | 0 |

|                                  |    |   |   |   |
|----------------------------------|----|---|---|---|
| 560e4631602a42d96c7f3142e5a21493 | 10 | 0 | 0 | 0 |
| 88e26ba8a53eaec1ec1e5aae2077f01f | 10 | 0 | 0 | 0 |
| b88f4b36a287a84f1d86035f1755bd58 | 10 | 0 | 0 | 0 |
| ef399625d70633d30102c962e477de7a | 10 | 0 | 0 | 0 |
| d4e65ec28cb95d812cc7d71aced190ae | 10 | 0 | 0 | 0 |
| ae07665142b208165889549b4942c48e | 10 | 0 | 0 | 0 |
| fd16af92235fb473113c92fd05cff6a3 | 10 | 0 | 0 | 0 |
| 232b7e63700129e9bc5b1d83532ab07a | 5  | 0 | 0 | 0 |
| 7ae55291f26c41c5b4ef612a2b1be881 | 10 | 0 | 0 | 0 |
| a28273aa7048e9eccf4b7b3b1006f113 | 7  | 0 | 3 | 0 |
| 313cf6a4abdec567c4226489ec24818  | 10 | 0 | 0 | 0 |
| 0f886f48ebff9ff7b541429eb5b8ba20 | 10 | 0 | 0 | 0 |
| 772d8a2652af08e2523e46a6779f8125 | 8  | 0 | 2 | 0 |
| 2ac4d92fded725cf675d141576428c87 | 10 | 0 | 0 | 0 |
| 7721871b95691b36c473b4da4ceb112a | 10 | 0 | 0 | 0 |
| 067f74b8dbbc012dafa6ac3ce576275b | 10 | 0 | 0 | 0 |
| 01318162209a56066c6db384f7a8c8ec | 4  | 6 | 0 | 0 |
| 34b9bc088630909d7112adebfe9eb6e7 | 5  | 0 | 0 | 0 |
| 648f599598fcf07a762fc3cbbaf929ce | 10 | 0 | 0 | 0 |
| 41a7b53f1b37f123c7ffdb6a2ee94095 | 10 | 0 | 0 | 0 |
| 812b2bafa83d1ead699a104c0707e20e | 10 | 0 | 0 | 0 |
| d24fffa44a64623fc42938e5188dcbdc | 5  | 5 | 0 | 0 |
| 90f0bad4a9e47a63bdcf5b04f7b74b06 | 10 | 0 | 0 | 0 |
| 6e3ac9f6a31e0379dcec41b473e0264a | 10 | 0 | 0 | 0 |
| 38e01a568b75996551b831d65f578b7d | 10 | 0 | 0 | 0 |
| f99b2c58c08ec4377be5691e22d0d88c | 10 | 0 | 0 | 0 |
| 81c9d25bd17d6e784856089c241e9f85 | 6  | 0 | 0 | 0 |
| 5237b4c0622d73885be9684c0f6b16ee | 4  | 0 | 0 | 6 |
| 430481b9a6d8b2b93cff117bc0806540 | 10 | 0 | 0 | 0 |
| a3b55c7e888b7ecd8a2e220577c1d6df | 5  | 0 | 0 | 0 |
| 83f2aebdc0fc95a7aa0d3cc2d3bdae74 | 10 | 0 | 0 | 0 |
| 076b89fe2f206970b5ccb3c6ad9409f8 | 10 | 0 | 0 | 0 |
| 63e5573ee2eadf5bd70272c4eda57e34 | 10 | 0 | 0 | 0 |
| 73331f2403062fd99f9dd92b05e0ee98 | 10 | 0 | 0 | 0 |
| 43abf589ae69644bbfcf0a14d8122353 | 10 | 0 | 0 | 0 |
| f27512d0200d3d3c1d26b7b5aded4133 | 5  | 5 | 0 | 0 |
| 2de29dc3213e6ee592cfc5160f8a01b9 | 10 | 0 | 0 | 0 |
| 267f522efd99ca4572dec9e9a6c11121 | 10 | 0 | 0 | 0 |
| 0f59c1b987577b9fe6e5216fd3fc82ad | 10 | 0 | 0 | 0 |
| 628aea6e00dce7ee73c57ecebab60f5a | 10 | 0 | 0 | 0 |
| 771419243a4c99be004f56294b2f510d | 10 | 0 | 0 | 0 |
| 1ec6f820579393ac3599e587c0ad2ebb | 10 | 0 | 0 | 0 |
| 8c49ef1328e4e890790362ca2d100339 | 10 | 0 | 0 | 0 |
| 49d14eeb0b7dceb8a40bbf7967c33bf8 | 10 | 0 | 0 | 0 |

|                                  |    |   |   |   |
|----------------------------------|----|---|---|---|
| 97a61f28feac192f75740adaee6fa3cd | 10 | 0 | 0 | 0 |
| 61ff67f4b3efb6d8012aa62ac421f33b | 10 | 0 | 0 | 0 |
| c440c71c3be6d8a2fbfd074226ebcb13 | 3  | 0 | 7 | 0 |
| af6122ff00ffab21a39e62cbb656e011 | 3  | 4 | 0 | 0 |
| 520f73051aef21fefce0e79bb755fea  | 3  | 0 | 4 | 3 |
| 5f38140bc41c2b5eea09417b801ed8d6 | 10 | 0 | 0 | 0 |
| 4c81a041d91ca3bac78bd23cd4ff9e7d | 10 | 0 | 0 | 0 |
| b189d15fde45968b9fa8c5ca87bf95c1 | 10 | 0 | 0 | 0 |
| ca5513e85f4f48335d2ec99f35cd5caf | 0  | 0 | 0 | 0 |
| a0547180e147650776787df3834329d3 | 0  | 0 | 0 | 0 |
| fcf71c7585a8df91ef1cadf0950cb9ad | 0  | 0 | 0 | 0 |
| 1f90f5e28d61ddeb2f19c01f26207572 | 0  | 0 | 0 | 0 |
| 7c35b0a22a18e5cbde81ac3245cdaaf9 | 0  | 0 | 0 | 0 |
| 28e1a812a4fe836f60032518138f9670 | 0  | 0 | 0 | 0 |
| fed90b99642bc860b459f69f73ce2133 | 0  | 0 | 0 | 0 |
| 58084cc7d33c5e03b33a9ca3ae26613d | 0  | 0 | 0 | 0 |
| c13359a9f895b1a2b9fcf49ceaea0e8a | 0  | 5 | 0 | 0 |
| 323dbd05b03ea48608c8130b315c66d7 | 0  | 0 | 0 | 0 |
| 84a31cf1684e735c6d8cdae74797b318 | 0  | 0 | 0 | 0 |
| 585bc58d77c32376d9edf7a36d7d8187 | 0  | 0 | 0 | 0 |
| 6a654b9df401536c536e775515e7c9d8 | 0  | 0 | 0 | 0 |
| 35626047c85ba2809228f53fd981e4c4 | 0  | 0 | 0 | 0 |
| da5b70ad681ecb7d5108ba2d5eb2227c | 0  | 0 | 0 | 5 |
| 4cd4b9b74864ab4baabb77111783baff | 0  | 0 | 0 | 0 |
| 0d7792a99440c748f65dd9c3d610ea79 | 0  | 4 | 0 | 0 |
| f6148ea03f01b2f1b46b26d286071bfd | 0  | 0 | 0 | 0 |
| 0820cc5fcb66deef5e68efb6659d3ee4 | 0  | 0 | 0 | 0 |
| 8513c2a0827d729ea766929f67afcb07 | 0  | 0 | 0 | 0 |
| dd8882882c6415099b5e936532084184 | 0  | 0 | 0 | 4 |
| a96e72afdcafaa78383ab76999dbe98b | 0  | 0 | 0 | 0 |
| 4b6f00386bb9df0c0c2f0030bfac3894 | 0  | 0 | 0 | 0 |
| 7c0e62d7c9237bc43d70036d53365cd7 | 0  | 7 | 0 | 0 |
| ff7bf624be6a7a099ceea85d84bc9c1e | 0  | 0 | 0 | 0 |
| c122c4312e044cdd6dd4a6d06504f6d6 | 0  | 0 | 0 | 0 |
| 5ab0711ed9959457c9ccd61955be31cf | 0  | 0 | 0 | 0 |
| 9400fc94f8efcb54d0c1aa2abdff5081 | 0  | 0 | 0 | 0 |
| fae2c04d6cb0d1ddb69ab7c4479fe68  | 0  | 0 | 5 | 0 |
| b7cf4c664c81eb17b544253f4bc6066c | 0  | 0 | 8 | 0 |
| 7f929a7db8c46c8466a8afd30edfd74d | 0  | 0 | 0 | 0 |
| 6be7b0f6c4c2ac694c367a9ed413ab4f | 0  | 0 | 0 | 0 |
| c36a7f05a9a6276253b8e5ae6b8b901a | 0  | 0 | 0 | 0 |
| 5dc2dd2e57576912599c3b1a94c1da49 | 0  | 0 | 0 | 0 |
| 66ce9ef1a2feae01b282945f440fdd6f | 0  | 0 | 0 | 0 |
| 80bb4ea1f2d2b98e0151641b506dc1f3 | 0  | 0 | 0 | 0 |

|                                   |   |    |   |   |
|-----------------------------------|---|----|---|---|
| 01ad5e8af1ca569c2c95ed2abfab7ea   | 0 | 0  | 0 | 0 |
| c18df5dff94666e00049a2a243d3e304  | 0 | 0  | 0 | 0 |
| 11a1644d1c2215bda6f5ddaeeefed6998 | 0 | 2  | 0 | 0 |
| 710a3fb356ad131179ba240793831779  | 0 | 0  | 0 | 0 |
| 50f6654acb7911b8a14d7826f487683e  | 0 | 0  | 0 | 0 |
| 7ccf8e1ca76ffd94fec52b5d98cf390f  | 0 | 0  | 0 | 8 |
| 87201741e31efaaeeefad9b4a6271c887 | 0 | 3  | 5 | 0 |
| cdfd65354093c4e31deb8b508eb3de82  | 0 | 0  | 0 | 0 |
| da37e255778474044679d20b170e0b9f  | 0 | 0  | 8 | 0 |
| e38b2c7c1c1b7802ff168de9eb02acfc  | 0 | 0  | 0 | 0 |
| 0f620ae04b2f936f39294113eefe076c  | 0 | 0  | 0 | 0 |
| 33cc8667f86ec4fd8870710503fec02e  | 0 | 0  | 8 | 0 |
| ef5dc755be09110cb3f5b0f719b961f1  | 0 | 0  | 0 | 0 |
| 6f048de8028616684a5d3fc6e7775d41  | 0 | 0  | 4 | 0 |
| 48ec0b09da49ebcccc214b885e23ad6c  | 0 | 0  | 0 | 7 |
| dc152ca37d1c0899b02e7254779edbcb  | 0 | 0  | 0 | 0 |
| 38be0a505fb9979dc5116ef80d61a4e8  | 0 | 0  | 0 | 0 |
| d55f4b8f11c56d35ce6e17f89369be79  | 0 | 0  | 0 | 0 |
| 721a393f44f9e460f962840e29523f05  | 0 | 0  | 0 | 4 |
| 382ff6f715d2ed8dfd9eedf5e5f529a3  | 0 | 2  | 0 | 0 |
| af112e1b86f641c960a2fbb4d425df3a  | 0 | 0  | 0 | 0 |
| 8638e8120d79992a9cd2d6630405062a  | 0 | 0  | 0 | 0 |
| d1139c45abf8692357eb9ba4ea65c49c  | 0 | 0  | 0 | 0 |
| 4e35316891e49afd26fe7843fc0a1f39  | 0 | 0  | 0 | 0 |
| 285135b1b849be3ba267851fd0009e14  | 0 | 0  | 0 | 0 |
| b8448e1536bb465f4777ef1fda5200b7  | 0 | 0  | 0 | 0 |
| a5bd85f6c3b255b5c6b24e6edea3f328  | 0 | 0  | 0 | 0 |
| 9255c9e1c0bd53541d41fd30b1899048  | 0 | 0  | 0 | 0 |
| c90337f68912564cb28f07fea26e3df7  | 0 | 10 | 0 | 0 |
| 9b6ce6efebb2d876acf8a804b14c8575  | 0 | 10 | 0 | 0 |
| cdcf149c5b8f393fc6562820be8a93cd  | 0 | 10 | 0 | 0 |
| cc7a4f4f06f790e68244242c734cb92c  | 0 | 3  | 0 | 7 |
| 14efe05824d9f3da5d6eb7dedcd41eb2  | 0 | 10 | 0 | 0 |
| 57bede056dee96d0d6b08bdcb7e6497c  | 0 | 10 | 0 | 0 |
| 5192c1fcee8b63781e4546f5257d9a92  | 0 | 10 | 0 | 0 |
| cbe012d4fa461eb7cdff355b83b57335  | 0 | 10 | 0 | 0 |
| 53356690fb1257e735c2002c6ea2bb64  | 0 | 10 | 0 | 0 |
| 39933dfce1801bf03e70a687ff8d19d2  | 0 | 10 | 0 | 0 |
| e9bb7b036f7d1b46aa0fe96ad45a410a  | 0 | 10 | 0 | 0 |
| a95bee42d67b0cf124115e22032563be  | 0 | 10 | 0 | 0 |
| 6745ab5143ef1201e170d1875426ce41  | 0 | 10 | 0 | 0 |
| 8504a2a6b6329d49e09221e7c64c14c1  | 0 | 10 | 0 | 0 |
| ee2cdd9ba8cf70217de865bac2271e36  | 0 | 10 | 0 | 0 |
| db40209f9039dc19ff21c413ae121aff  | 0 | 10 | 0 | 0 |

|                                  |   |    |   |    |
|----------------------------------|---|----|---|----|
| 9cf49cef45934127666aba6372b0c793 | 0 | 10 | 0 | 0  |
| 097ac0053d3581a4a3e4762a82d7ef34 | 0 | 10 | 0 | 0  |
| f956c9c20388662914d4cbb004bbc1be | 0 | 10 | 0 | 0  |
| 78df6523127317e4bf1f3566dcd58e39 | 0 | 10 | 0 | 0  |
| 455bf157c81e01c6ebba4320a8b5c71c | 0 | 6  | 0 | 4  |
| 50db00ea6cdaa7ee87fa837ff5370b15 | 0 | 10 | 0 | 0  |
| f102c5da1643b04b9b91c996325a0c88 | 0 | 10 | 0 | 0  |
| 1c7a1eccd4e7d15e4cbb0e6d2f5ed9a1 | 0 | 10 | 0 | 0  |
| e9a7e900045441186db88b2aa38d5f65 | 0 | 10 | 0 | 0  |
| 4d36d95c44b25bd1a64b37f3edafbad  | 0 | 10 | 0 | 0  |
| 218bb236ae1c0670d0c204a36bdcde57 | 0 | 10 | 0 | 0  |
| f8b6ddccf849c1c68bc1c671fddeb8ef | 0 | 10 | 0 | 0  |
| efbcb79ddc80e70600d804f407c250b5 | 0 | 4  | 6 | 0  |
| 1ade2644fb27c0e7e3849cdb6c4cf304 | 0 | 10 | 0 | 0  |
| e6c7f2820370e2f17ead9a000deb5697 | 0 | 10 | 0 | 0  |
| ece69a185eddb5bbf63c74d1ace66ae7 | 0 | 6  | 4 | 0  |
| 881a965d2bce4bf116c2de8e21315031 | 0 | 8  | 0 | 2  |
| ae254bfebb12a5f566c65329f5186cdd | 0 | 10 | 0 | 0  |
| 470bbe9eb6821dfdc34d33846783f79c | 0 | 10 | 0 | 0  |
| 0af9a56bbaaa1139e7ab1e79c1ffcd9b | 0 | 10 | 0 | 0  |
| 6a243ae85c4b4e49a0591184d9eacfa0 | 0 | 10 | 0 | 0  |
| a98984dc9135ea28544f1b8e801834f2 | 0 | 10 | 0 | 0  |
| 5fba417a2be446d5dd4f0d4530280147 | 0 | 10 | 0 | 0  |
| 18f0df88e497dc3342e5ba1ed0cca7c7 | 0 | 10 | 0 | 0  |
| b2e3d17b0a67e87ea42fd70d756c3085 | 0 | 10 | 0 | 0  |
| 3cf0616f3e22f52034ebbc5be1e5bae6 | 0 | 10 | 0 | 0  |
| b84e4beaa1ac75b770b5247869a08bed | 0 | 10 | 0 | 0  |
| e368a26ed42aa98f67121e47d344ad75 | 0 | 10 | 0 | 0  |
| cf4592c0957df79d137cf5cfdb3d7163 | 0 | 10 | 0 | 0  |
| a0375988372dfad4e4399c77cbd46612 | 0 | 10 | 0 | 0  |
| 9b7422ce29eb246f5fd9856ffd748825 | 0 | 10 | 0 | 0  |
| e8d4d9a66dfe70441302ca34dabac875 | 0 | 0  | 0 | 10 |
| 9587b42eafacd80a6dbe803e080a21c9 | 0 | 0  | 0 | 10 |
| 406a3805f7a3209a6164f2d1c568d8e2 | 0 | 0  | 7 | 3  |
| 32bcde83362b4450c55263ae93ac5b8c | 0 | 0  | 0 | 10 |
| eecbf2666bf31ffee0906ee74a49a345 | 0 | 0  | 0 | 10 |
| 4191a9c8abe4f9dcaec1a1be6985b6a5 | 0 | 0  | 0 | 10 |
| fc1ce782126b46f62a30277f73dc701d | 0 | 0  | 0 | 10 |
| c2dc23c63ee630762404c7f1a6545e15 | 0 | 0  | 0 | 10 |
| 45ce32a8ad418152a2a57dfa0a440378 | 0 | 0  | 0 | 10 |
| fb5ca56582ea52145b76ba570bc8560c | 0 | 0  | 0 | 10 |
| 4bb231c1b233670c90d2793b9bc1e153 | 0 | 0  | 0 | 10 |
| 57e5963472f6b79f76fc31a08c4b4cb5 | 0 | 0  | 0 | 10 |
| 0e9842d521af47b5343a31b71ad2f981 | 0 | 0  | 0 | 10 |

|                                  |   |   |    |    |
|----------------------------------|---|---|----|----|
| 773cd95b0a38dd120915e60ef5f647cf | 0 | 0 | 0  | 10 |
| 5de936f3b128188344671be31777b1b2 | 0 | 0 | 0  | 10 |
| 6a0524639e5e0ce8d411a6becc945b4a | 0 | 0 | 0  | 10 |
| c55c8cdad03355dbca2d967683ca2675 | 0 | 0 | 0  | 10 |
| a1f9205708148573e3015dccfd9b659  | 0 | 0 | 0  | 10 |
| c64fdaf622da6f23ce010dee1e780077 | 0 | 0 | 0  | 10 |
| 938cc69d79b85ff79011844da2a05ab6 | 0 | 0 | 0  | 10 |
| 784d4e33061baacae303f800b38841d2 | 0 | 0 | 0  | 10 |
| e3da786bd2f3b5b06a4b9a191439cf44 | 0 | 0 | 0  | 10 |
| 42e83f7df66eb861d79177be684e6a41 | 0 | 0 | 0  | 10 |
| 2c365cc973a4b1b9339750fd7a62c74e | 0 | 0 | 0  | 10 |
| bf0da6c12d92c31bda59d2c1dd0c5da2 | 0 | 0 | 0  | 10 |
| 79bfd7131581b7bc29088076ec9f228d | 0 | 0 | 0  | 10 |
| 6a609ca34280ef429595b8d735515a38 | 0 | 0 | 0  | 10 |
| 56c64e28c6df2c27186a3f16877e38ae | 0 | 0 | 0  | 10 |
| 98f2801fa7bfeb6d3826e324f7436fff | 0 | 0 | 0  | 10 |
| f143b90741820e23d5d1079214ea79c2 | 0 | 0 | 0  | 10 |
| 093c8b480725489722e16bef251d5357 | 0 | 0 | 0  | 10 |
| 5fc19acc2b339534b9e56c5dc00ba854 | 0 | 0 | 0  | 10 |
| 78d577aa511b9bbaa94b1cd7213bcb72 | 0 | 0 | 0  | 10 |
| 0dadab8e35dc975966f2da492f5b39c5 | 0 | 0 | 0  | 10 |
| 3e56bd70bc2f596300a06737afd5ce06 | 0 | 0 | 0  | 10 |
| 69868846d1acda9d8617c8dc40090eee | 0 | 0 | 0  | 10 |
| 30c702f1a1100e974690b809581cc46f | 0 | 0 | 0  | 10 |
| 508fa972dd8b444d2b0ffa35c4a7d16d | 0 | 0 | 0  | 10 |
| 4676b690b076f854a78c8c3d7e439d53 | 0 | 0 | 0  | 10 |
| 0c32015fc9a85dd08f86377b32fe5611 | 0 | 0 | 0  | 10 |
| f81bae5e5f69e60a155424503f0c673e | 0 | 0 | 0  | 10 |
| 8682cd4a961a2b31bb252a7675a74506 | 0 | 0 | 0  | 10 |
| 0368cca2161d0dda8a2f2190b25f0867 | 0 | 0 | 0  | 10 |
| 912dbbdcd560f2f4d29101646d770f1c | 0 | 0 | 10 | 0  |
| 7552e193cc15f2a1a79eac3a046df9b0 | 0 | 0 | 10 | 0  |
| 5121b22b478cceca529a25e77617964e | 0 | 0 | 10 | 0  |
| 5db5fec24f7708d4f3526fc4cf605f90 | 0 | 0 | 10 | 0  |
| 8df00d37be4e96b60d07bef9e7183b41 | 0 | 0 | 10 | 0  |
| b0ffead67bdd8e2439155da5761c13f0 | 0 | 0 | 10 | 0  |
| ec243ebaa63f1e7fc0cf0876ea1980a8 | 0 | 0 | 10 | 0  |
| 3d3919e0bdb94ac9bc7b5c3ea9d266e2 | 0 | 0 | 10 | 0  |
| b2abcc94e2c3f2397df1fad0757497fc | 0 | 0 | 10 | 0  |
| ba5d8f55881189e851a5cedd91e56507 | 0 | 0 | 10 | 0  |
| 472c58f4a85b184fc87f02bd8dbddc1f | 0 | 0 | 10 | 0  |
| 3a86052f48beee66da568ac41d2fc7e2 | 0 | 0 | 10 | 0  |
| a6cc0ef827c5d84401bad0e65c13f7a4 | 0 | 0 | 10 | 0  |
| ed4e397a4b60414a1ec9387e2941d921 | 0 | 0 | 10 | 0  |



|                                  |   |   |    |   |
|----------------------------------|---|---|----|---|
| 4c0ecad3795958d0ea09941b68c68ea3 | 0 | 0 | 10 | 0 |
| c35dd0cccc22564e4e24987b1df5af2b | 0 | 0 | 10 | 0 |
| eee3ea796fb8efacd65352a406c8c1fd | 0 | 0 | 10 | 0 |
| 6cd32a3ecbbfbec329f59f28b063a70c | 0 | 0 | 10 | 0 |
| 3f6784a2333cdf4328c3c3ec0f987585 | 0 | 0 | 10 | 0 |
| f68e3844865947b4bf3c5dd255a8da2c | 0 | 0 | 10 | 0 |
| 6c3ded7dc3353781100ac79bddbb44cc | 0 | 0 | 10 | 0 |
| 3a5f68190bcf3c2f1ab6306baaa2eded | 0 | 0 | 10 | 0 |
| 427711e5759804d6953eec7dbfe29fce | 0 | 0 | 10 | 0 |
| c8899265f50c3be8b164eff9074f951f | 0 | 0 | 10 | 0 |
| 8ae396b858a5761849826a7f811a71a0 | 0 | 0 | 10 | 0 |
| c7141b509bff534022625df45bc0a1d7 | 0 | 0 | 10 | 0 |
| d223c6ad4e64bea8a9bc3dbf4f5be918 | 0 | 0 | 10 | 0 |
| 70153e4488b55507400f075ec9b0b22e | 0 | 0 | 10 | 0 |
| 75e769d983e88bf847b2f9b8e63d8338 | 0 | 0 | 10 | 0 |
| 977b61b99aec4bb1afe56e309e73a47c | 0 | 0 | 10 | 0 |
| 4780f0282ce81c6cbe2d42b958c4ad83 | 0 | 0 | 10 | 0 |
| 26ae76081f8bf3b663bde571e3f51628 | 0 | 0 | 10 | 0 |
| 2f52a4a150f6a8b878af365f60d213ee | 0 | 0 | 10 | 0 |
| f1e3655fd3cb20679c4bf4f56d92acf2 | 0 | 0 | 10 | 0 |
| a74abd5e8f2c6f97a4b3509be7b783b2 | 0 | 0 | 10 | 0 |
| 8e7a5f306d47610e0ab88e4f44f9d83f | 0 | 0 | 10 | 0 |
| d91aec52c9d5a7bb9bb03747a1a37b00 | 0 | 0 | 10 | 0 |
| 0942b9e08711dfce63355cce244d8c95 | 0 | 0 | 10 | 0 |
| 7dbd60e4cb2f3d08754882c1de54f732 | 0 | 0 | 10 | 0 |
| 7d5f1b2fd2112ae1e6351e4e65fae20a | 0 | 0 | 10 | 0 |
| b9e3efb4221bc04ac24f9e37ffeb7418 | 0 | 0 | 10 | 0 |
| 37cba3a786f8ee86e2bb7de93e62cbc7 | 0 | 0 | 10 | 0 |
| a4b1a98611664881ea870105edad8998 | 0 | 0 | 10 | 0 |
| 60414cb2b4d98bcfdcd29ac3b1bcb954 | 0 | 0 | 10 | 0 |
| 4e93beb9cb588c84da5cce2f1bfa1e94 | 0 | 0 | 10 | 0 |
| 6b88e8248afdd96544f4b8b75524bd3d | 0 | 0 | 10 | 0 |
| 690bbc264f2eb716319b7696e03e3fcf | 0 | 0 | 10 | 0 |
| 9c618a65e3a2c8d4988caa457e3e1455 | 9 | 0 | 0  | 0 |
| db509502e70047ae80208e486a1a4222 | 3 | 6 | 0  | 0 |
| 5b4113779abc5f4560a6c0ca79b9c1de | 9 | 0 | 0  | 0 |
| 6087390cc86a7d863548d052418f981b | 9 | 0 | 0  | 0 |
| ce555f6b1b3083e67501ba419d7e23d3 | 9 | 0 | 0  | 0 |
| bf947f2fbb4f16e32e32ffbde7a10cb1 | 9 | 0 | 0  | 0 |
| 6eaea5c06962315723deee271f46691a | 9 | 0 | 0  | 0 |
| 0f937bff08b0b017a094758b93d195c1 | 9 | 0 | 0  | 0 |
| 1afb8b7b0b28c2569e37b4ee773c12ab | 9 | 0 | 0  | 0 |
| 3ab25b494a9f9f404bb0096aee7bc171 | 9 | 0 | 0  | 0 |
| 8dcfed88ea8ec5ec757e9c3ca111e2b1 | 9 | 0 | 0  | 0 |

|                                  |   |   |   |   |
|----------------------------------|---|---|---|---|
| 31ae5c763e704273dc07beb623190a35 | 9 | 0 | 0 | 0 |
| 29e5b15b33fdaf1a6c7ff96004bdad06 | 9 | 0 | 0 | 0 |
| 1ca99eaa3b7a5328a03f53a5eec1dd23 | 7 | 2 | 0 | 0 |
| 0c28bac8bc273926522b284f014eb93f | 9 | 0 | 0 | 0 |
| 30d13ee485759923c5fb3177605823c4 | 7 | 0 | 0 | 0 |
| 04b10cf72a69e13cb00afce7a5f0c849 | 9 | 0 | 0 | 0 |
| d90e2b98a3bfb7cddb1bbd61da57b22d | 7 | 2 | 0 | 0 |
| 81c04b389f9f8c1e771c58305a5079d3 | 9 | 0 | 0 | 0 |
| 179ee72372c97fa950e613c5b9e4659a | 9 | 0 | 0 | 0 |
| 51b9471d21ee34bc8f3657ca748d711e | 9 | 0 | 0 | 0 |
| 552bf91580e98144cdd669cb2eb5405a | 3 | 6 | 0 | 0 |
| be37cf529374cbfd4f2e83039a7eb2eb | 9 | 0 | 0 | 0 |
| c7d84a87315803f300f3c4fff806c238 | 9 | 0 | 0 | 0 |
| 5ef63246b0fd024447f7d721767d65a4 | 7 | 0 | 0 | 0 |
| d17261e77ac798a2e9ce0b8cfb7de66d | 9 | 0 | 0 | 0 |
| f14f77e999ac7cec06ff91313ad41b88 | 9 | 0 | 0 | 0 |
| 4a8351426e9ab576c703c572e44ff614 | 9 | 0 | 0 | 0 |
| 724199013a3e79855b6fec01786917f0 | 9 | 0 | 0 | 0 |
| cde92e4899678fedda2da93da48ca840 | 9 | 0 | 0 | 0 |
| d0dd7ab6c0ac3164166ef7d11eb04c9b | 9 | 0 | 0 | 0 |
| f6f97c59d06674567d0636dedbd6945b | 9 | 0 | 0 | 0 |
| 61c17ab750ea1523cce0fb2c222eddd6 | 9 | 0 | 0 | 0 |
| f50b7ec6374e85d2e50a155769f5d310 | 5 | 0 | 4 | 0 |
| 2ada647cc246c83a345c189910ded7fc | 9 | 0 | 0 | 0 |
| 483930edec4ab1e630c1e688f514361a | 3 | 6 | 0 | 0 |
| 7d20022ab8c91ceccbc3b6f3e39a3323 | 9 | 0 | 0 | 0 |
| 275a6aa06128981b3b294c77b863b8cd | 9 | 0 | 0 | 0 |
| 7ef18a493c7693f40d12eeda60898ab5 | 9 | 0 | 0 | 0 |
| 2ff8be2dc55780f6ad7cace4bc55a3a9 | 9 | 0 | 0 | 0 |
| 51e4a41a60ad289f184a96338509adcf | 9 | 0 | 0 | 0 |
| 31af39f5215c2df2fcc1703e77e80354 | 9 | 0 | 0 | 0 |
| 8e3e749c8cf821d507360956696bde8a | 9 | 0 | 0 | 0 |
| ac218806afdfcaad76223efbc61e670c | 9 | 0 | 0 | 0 |
| 3ce4fb75ca97386e26dda96cbbae8543 | 9 | 0 | 0 | 0 |
| 6dd89a8d5b000c1ea8e7c5acebc9fb1a | 9 | 0 | 0 | 0 |
| 952fb13363b01e15170467b8eebe2373 | 9 | 0 | 0 | 0 |
| 7f5be1467445b3ef0321976c3e11e386 | 9 | 0 | 0 | 0 |
| 040bf4016b8c9b979db749ca32aed628 | 9 | 0 | 0 | 0 |
| 9e14585d6a00edf2915dc7450cc192bf | 4 | 5 | 0 | 0 |
| 18abd6ac0411afbd57daa95bdf536c08 | 9 | 0 | 0 | 0 |
| a18a2c433cbe66619a822c9237121129 | 9 | 0 | 0 | 0 |
| 2d431da4bffd357fb190a88281773f3  | 3 | 0 | 3 | 3 |
| 50e014d7f4b3a7b7f9c45e06da2d9db9 | 9 | 0 | 0 | 0 |
| 98c6cb4bad469d5beea8606d8eb7f64a | 5 | 0 | 4 | 0 |

|                                  |   |   |   |   |
|----------------------------------|---|---|---|---|
| 482f4b7950d0753d1ecbc73edfd02043 | 9 | 0 | 0 | 0 |
| 7de48558cf68e3b2120fbb75e626d184 | 9 | 0 | 0 | 0 |
| 446ed6910e45cab4e0940dc2af38897a | 9 | 0 | 0 | 0 |
| 8389e38d5b097326e00601d30fc6a6df | 5 | 4 | 0 | 0 |
| 8a31be2646a92628e31f08315fbe0d61 | 9 | 0 | 0 | 0 |
| 62f2f373e4091426715a64ba99f99c3a | 9 | 0 | 0 | 0 |
| e25c60e46ad83c8f69b48e04c2f13ac1 | 9 | 0 | 0 | 0 |
| be8dc04fa47556707a85fed5172b940c | 9 | 0 | 0 | 0 |
| 136350f769198cfa9f1c20a0868c715e | 9 | 0 | 0 | 0 |
| a165f6957287e2a729ae4a054a488d5b | 0 | 0 | 0 | 0 |
| 1d8735ae042efd41ba7997d50c6c0903 | 0 | 0 | 0 | 0 |
| 7c7c6070fc4ad6856080d5524eff7a4c | 0 | 3 | 4 | 0 |
| a3b3c97dbf4e4a96bebaa3a9982f9b23 | 0 | 0 | 0 | 0 |
| 73351f01a5cf3f68168bdb5b14a1a38a | 0 | 0 | 0 | 0 |
| a8ece72f25a6b8150c67a1b86071f24d | 0 | 0 | 0 | 0 |
| 3a64207fbdea205ee6b61aafaa9a3133 | 0 | 0 | 0 | 0 |
| d0624c59c360ba7ba1823975b97108e5 | 0 | 0 | 4 | 2 |
| fc50c885aead9d4c56db8fbd29bda5d4 | 0 | 0 | 0 | 0 |
| c5ea28450f4151f6d7cac9cdc644ad12 | 0 | 0 | 0 | 0 |
| bf01debfa4005b849ebbef0f161aa8f0 | 0 | 0 | 0 | 0 |
| af3acfb5e64f47d329fe2a692115a3b6 | 0 | 0 | 0 | 0 |
| cf7caa0dff39a92d11cc3d69603a5455 | 0 | 0 | 0 | 0 |
| 1a1ed449a723b64120e76a2bf44e2056 | 0 | 0 | 0 | 0 |
| f6009b8611c2bffe526c36f5066bd2c8 | 0 | 0 | 0 | 0 |
| d644421a0cba74387f750eb104c3af01 | 0 | 0 | 0 | 0 |
| 7f5db8c387944db5bd54e69b0697e365 | 0 | 0 | 0 | 0 |
| 71bd05dbd18145b4fa2cb9586962b868 | 0 | 0 | 0 | 0 |
| daf552794ea748b8428207cae5618e96 | 0 | 0 | 0 | 0 |
| 3e75944e2149bda7a3be61e78a705ddd | 0 | 0 | 2 | 0 |
| 99ebd21a87471bb21d73cc46de2ff2f4 | 0 | 0 | 0 | 0 |
| d2184f396b2adc7c833b83c26dbea335 | 0 | 0 | 0 | 0 |
| 103372ce998cbbbce92c4ad1adf0c6b8 | 0 | 0 | 0 | 0 |
| ed49ae655d2eb982f29c12964680138e | 0 | 0 | 0 | 0 |
| 6bbdc673c6224f1472c8c37475864439 | 0 | 0 | 0 | 0 |
| 7b01f4c3dbfb5331f6c4aaf55f0149e6 | 0 | 0 | 0 | 0 |
| a642b1dd9f8cd578c0e0e150faa4d72b | 0 | 0 | 0 | 0 |
| 9e4a17840608691bd749e04be862f760 | 0 | 0 | 0 | 0 |
| f2eba8b9237949dfb24bd9a2337a0349 | 0 | 0 | 0 | 0 |
| 602c1d9a6ddf43e0181c30658f8c7d12 | 0 | 0 | 0 | 5 |
| 87e91bc41bb81aea74319071084dd6e8 | 0 | 0 | 0 | 0 |
| e0c6c72a7e6d9962e04be728f711408d | 0 | 0 | 0 | 0 |
| 8f83c82d9ce9ab87e6970fd3430bc87b | 0 | 0 | 0 | 0 |
| 63a214831a7baacd30a9b683ff8559df | 0 | 0 | 0 | 0 |
| a5eec7763968f38975825ff977bb3c2f | 0 | 5 | 0 | 0 |

|                                  |   |   |   |   |
|----------------------------------|---|---|---|---|
| 9135926dff71b363e75d0e192e809958 | 0 | 0 | 0 | 0 |
| 248a5db4dc37683b3933c22df953df   | 0 | 0 | 0 | 0 |
| 9ceb542abca0440f5f4423f5ba43ec73 | 0 | 0 | 0 | 0 |
| 3989c26c85249b0b9dd7284bfc98a30b | 0 | 0 | 0 | 0 |
| f290a9c658739978c90eb52781f6a23e | 0 | 0 | 0 | 0 |
| b3c4bf7c6130a7bf70f2167bf124bd4c | 0 | 0 | 0 | 0 |
| 1f54fbd2080793132433350804f8da15 | 0 | 0 | 0 | 0 |
| 206252cb1b732ced862f637a90dd0029 | 0 | 0 | 0 | 0 |
| 779784f9e7adf451e160586659b6aa14 | 0 | 0 | 0 | 0 |
| 092276165fa102303001b8737ba433bf | 0 | 0 | 0 | 0 |
| eaf7aaee3fd931d5f136fb5ebeed681d | 0 | 0 | 0 | 0 |
| e8d1e835d2dcd39c4eb365f037e8c9d6 | 0 | 0 | 0 | 0 |
| a620d6488b2d9394e6b506fa694d51f5 | 0 | 0 | 0 | 0 |
| 2e3a94508995f27a8b3713837d9fed7  | 0 | 0 | 0 | 0 |
| a848501b2ff10e43194201e9c1baf3a  | 0 | 0 | 0 | 0 |
| ae3fc9e8bcbf12cc4419ec77bc47884  | 0 | 0 | 0 | 0 |
| 1168f47307ec2ffde4c58621a781f86f | 0 | 0 | 0 | 0 |
| 9b494eccdb6d6ac5528bd6111cc779f9 | 0 | 0 | 0 | 0 |
| d6343aabc3753e522edd3347deef1924 | 0 | 0 | 0 | 0 |
| b37d5448c20c87d04b97aa4f4b499083 | 0 | 0 | 0 | 0 |
| ccef478a3c3bf9c9d11a3e6d0e69eb56 | 0 | 0 | 0 | 0 |
| 395527519ff9a43f03330ec7945bef96 | 0 | 0 | 0 | 0 |
| 63334e7ed54c319d10a14e83eb9163ff | 0 | 0 | 0 | 0 |
| ac60a990a82b932a79ab85c0c4ffd643 | 0 | 0 | 0 | 0 |
| be32dcefd10525170dd9d08cbb0a5c9f | 0 | 0 | 3 | 2 |
| 5934ed411430c91e65214ac98d75bee6 | 0 | 0 | 0 | 0 |
| 325653e47de4c6486b80ea477ea103e8 | 0 | 0 | 3 | 0 |
| da03931e8dc4ecd3a645c763f7a98dcf | 0 | 0 | 3 | 0 |
| b0926ca93b8616f2d8871878c31c5077 | 0 | 0 | 0 | 0 |
| d2c7029e150ab824b5a4e8ec850e4eb1 | 0 | 0 | 0 | 0 |
| 9da26e1c30371c543115ac23bdde4de0 | 0 | 0 | 0 | 0 |
| 1e9ee7dc64f12417456c85ee282209c0 | 0 | 0 | 0 | 4 |
| 55a4b2b02e0d037d486f68baa9896c5d | 0 | 0 | 0 | 0 |
| 72512accba5a468ecfb11d595a2e8ba3 | 0 | 0 | 0 | 0 |
| 216f3a997853330d6986de95c4a8d4ab | 0 | 0 | 5 | 0 |
| f58afc6b379e2d0699f43318176c1c57 | 0 | 0 | 0 | 0 |
| 7a425d0cae4a6dd9646dee0ae5aea428 | 0 | 0 | 0 | 0 |
| b5751c47ec38c1f3a93b8558b6ce98f8 | 0 | 0 | 0 | 0 |
| f41d2a8e75599174ed4d18ad917feddc | 0 | 9 | 0 | 0 |
| 25a8f0a5c3f2fc06cf3af6b55dbef5e7 | 0 | 9 | 0 | 0 |
| adbd90c93b16551d78b5d2ee96a67550 | 0 | 9 | 0 | 0 |
| 242879adc4bf8cae5115051911c734bd | 0 | 9 | 0 | 0 |
| f4d6a89f4e525014941c363328bd75b3 | 0 | 9 | 0 | 0 |
| 870fdcb08a28b170548454bacd784045 | 0 | 9 | 0 | 0 |

|                                  |   |   |   |   |
|----------------------------------|---|---|---|---|
| c42db1270070fcf15dac979e48948018 | 0 | 9 | 0 | 0 |
| 451159f95b356765bab87df19ef49969 | 0 | 9 | 0 | 0 |
| 60f4f41710e3a09493a5da83874449c2 | 0 | 7 | 2 | 0 |
| a0e3e1ba89e921f6fd0397284da38ef3 | 0 | 9 | 0 | 0 |
| dd43e8a39a17c29ae11616e24d6cff2b | 0 | 6 | 0 | 3 |
| 58bbedd95980d707d3b75503b8a29604 | 0 | 7 | 0 | 2 |
| 2b82da8a9602196dee9bfc12a7c1b56e | 0 | 9 | 0 | 0 |
| 5c8176b9444576798d48f1db2eb4e7d6 | 0 | 9 | 0 | 0 |
| 7f975fdd17f1f2e3e6edda4b7a257d1f | 0 | 9 | 0 | 0 |
| 62745ccf737d45f40d49acd2c648d1a2 | 0 | 9 | 0 | 0 |
| 391e8810c5357d951f77d2b97e361913 | 0 | 9 | 0 | 0 |
| ed37159606bd13bb95878840575f4c71 | 0 | 9 | 0 | 0 |
| 3c70a1d6b0a83e0c6af1a593f70e7821 | 0 | 9 | 0 | 0 |
| c698bb83dcbad0a1d79513b89c4b66b5 | 0 | 4 | 0 | 5 |
| b2eb9fbb81bef9f4ad6e9ce73c76eeb1 | 0 | 9 | 0 | 0 |
| 12009da6c3fdd4ee1f254c01a0ab325a | 0 | 9 | 0 | 0 |
| 0ce918f5760665c7f1f7227754164146 | 0 | 9 | 0 | 0 |
| ab6add029435aa7baeb29445822b51b5 | 0 | 3 | 6 | 0 |
| 079f0c0b028f2808c18e29a8e641cbfd | 0 | 9 | 0 | 0 |
| 26f6749debe15a7e3b76a20033fc6103 | 0 | 9 | 0 | 0 |
| 0fe7bc160575a472c29ad17940177f94 | 0 | 9 | 0 | 0 |
| 5423ffb82c74b8e69559c050b68bb0e8 | 0 | 9 | 0 | 0 |
| 84d339d1502d8b7fec4d0a81a90c67b2 | 0 | 9 | 0 | 0 |
| 898711c76a654ce30d34704393f00249 | 0 | 9 | 0 | 0 |
| feec7db29bc66bcd7a333761013f9c8f | 0 | 9 | 0 | 0 |
| 2d23e61357f4d710bf0cb231bef035c8 | 0 | 9 | 0 | 0 |
| e1a165c99fd333c13e6b7dca7b1bfd92 | 0 | 9 | 0 | 0 |
| a43f948f77c545b8928826317c2b6482 | 0 | 3 | 3 | 3 |
| 1d978b5f41ab26c5910a50f1a278b4eb | 0 | 9 | 0 | 0 |
| 14a819c0324b34ccd700e2332054e1ce | 0 | 9 | 0 | 0 |
| bba62cd738539022461cac220ca87b65 | 0 | 9 | 0 | 0 |
| d4344585b3102dde921483332f4e62e1 | 0 | 9 | 0 | 0 |
| 18ab217b8157371f3fb34fc1cdc53004 | 0 | 9 | 0 | 0 |
| 9e73124f47fc4ed96c0f9c352cc12d34 | 0 | 9 | 0 | 0 |
| 68ab6e97c48aff3e13fdff0d6fd78a51 | 0 | 6 | 3 | 0 |
| 2b369a6eedca9843eef33a58e52fa4b  | 0 | 2 | 0 | 7 |
| d7aad0c634dac5f9f9fe07808b6d7900 | 0 | 7 | 0 | 2 |
| 58fa4f25637374d6ee7da0178c8899d5 | 0 | 9 | 0 | 0 |
| e3f3e50ce70387f80cf6fecc40f4cafa | 0 | 9 | 0 | 0 |
| 3b1a9256fde3c21d909f4ac3b4b6c9e5 | 0 | 9 | 0 | 0 |
| aee89fa561e5830e735d0719a7a24a62 | 0 | 3 | 6 | 0 |
| d1ad481c2c4bf91b45f4ab80836d44ee | 0 | 9 | 0 | 0 |
| 149644669be5127cba0b1ffcd2c7ab33 | 0 | 9 | 0 | 0 |
| f27aa987d85bb2adc1a28169d06c4f67 | 0 | 9 | 0 | 0 |

|                                  |   |   |   |   |
|----------------------------------|---|---|---|---|
| faa4cd30a0d4fbb8ba2a76a43db7af1c | 0 | 9 | 0 | 0 |
| 8dbe541da136c95982c8967f767b0882 | 0 | 9 | 0 | 0 |
| 8ec4e12150f3b34c9b4eab5057ec3cc9 | 0 | 9 | 0 | 0 |
| 2ec303b07c2906146f090f0546d76048 | 0 | 9 | 0 | 0 |
| 474d2042191beccc15c8421897f40156 | 0 | 5 | 0 | 4 |
| b68c7d954ccf8a237fc138b3c1fabd58 | 0 | 4 | 0 | 5 |
| cbb7318bee98283c0b3a047e9399cb4d | 0 | 9 | 0 | 0 |
| 580de360fa29142363432b609d681f32 | 0 | 9 | 0 | 0 |
| a6d8070cd36ac5bb1cfa43cda8df2b72 | 0 | 4 | 5 | 0 |
| 7f2f424f68602ab55ac5cfbf31ea9642 | 0 | 0 | 0 | 9 |
| 515a7d22c8fc5339c64d65365a6435e7 | 0 | 0 | 0 | 9 |
| 83b96b708978b3eacf42182b933fa831 | 0 | 0 | 5 | 4 |
| 5b3e137923575b95267551281cb6fe5c | 0 | 0 | 0 | 9 |
| 639a50434cd7609e83f8de0a7307396e | 0 | 0 | 0 | 9 |
| 6ffbe12df8ba4447110333f872a29394 | 0 | 0 | 0 | 9 |
| 308321f0929ed68e0bb8aab9a9300179 | 0 | 0 | 0 | 9 |
| a83a248df86e544a2ed516108ff81455 | 0 | 0 | 0 | 9 |
| 057184f38c9ee9047b9d278a4956bdc4 | 0 | 0 | 0 | 9 |
| 4c3baa4603e2194e7eae740079dafd7b | 0 | 0 | 0 | 9 |
| 5ac910c32a595dddfea48df646a36076 | 0 | 0 | 0 | 9 |
| da42c5cb17f49425bc0ea226b0ef5f80 | 0 | 0 | 0 | 9 |
| 84712a8460a0aa0ea7b8f51c5bad3581 | 0 | 0 | 6 | 3 |
| 759ecd439f363c9db73de65bfda49d07 | 0 | 0 | 0 | 9 |
| 4263a1da895ca436b2defe46bb1cc48c | 0 | 0 | 0 | 9 |
| fc19856890d8a5696e566a93832ba6f1 | 0 | 0 | 0 | 9 |
| 2cfde7a5006bd5aec5f4c5aba2e80364 | 0 | 0 | 0 | 9 |
| f40bd75f20ea131f8236ec78742c8583 | 0 | 0 | 0 | 9 |
| c37d4a19ab0c5f68c02ac51b845670a4 | 0 | 0 | 0 | 9 |
| e375a946be88b1a9d578d701207b064c | 0 | 0 | 0 | 9 |
| 7612576ec420d649e894639160126659 | 0 | 0 | 0 | 9 |
| 9ef05facc095fbca0a3169cd7910dcb4 | 0 | 0 | 0 | 9 |
| 3dd60cebc2c084d7757579e86cf5b475 | 0 | 0 | 0 | 9 |
| fdbb98f973d9f4b7ad5dbe6b5df06581 | 0 | 0 | 0 | 9 |
| 47ba101aba271ccee2f210360d42bdd  | 0 | 0 | 0 | 9 |
| fdbb9ef8cfd2d3b2dd525299f1a77d6c | 0 | 0 | 0 | 9 |
| a65572580b11f0a828e024a03efc92f6 | 0 | 0 | 0 | 9 |
| 09efc0a981e558ca561892bc7ba4fbcc | 0 | 0 | 0 | 9 |
| 1f3db39d5d4f934dad90f11c7fe82a3c | 0 | 0 | 0 | 9 |
| 984122b76a5a729405ecdcf28e6130ad | 0 | 0 | 0 | 9 |
| 02af872efdf71389e6338e1619d47661 | 0 | 0 | 0 | 9 |
| 7e8c14374361a1fd74de8d55f5a76a68 | 0 | 0 | 0 | 9 |
| 198555c40e4c0598d5ae3d41509a385e | 0 | 0 | 0 | 9 |
| b3730ea4891a65886c489fd45dee2bb5 | 0 | 0 | 0 | 9 |
| 373004dfc8950fd4011b766a5a627275 | 0 | 0 | 0 | 9 |

|                                   |   |   |   |   |
|-----------------------------------|---|---|---|---|
| f715505541da48c9facd281046022842  | 0 | 0 | 3 | 6 |
| 8f4432c60263ca264b64e6cac8c3c404  | 0 | 0 | 0 | 9 |
| df5b0a555870c0edddb36cf37a2ae8859 | 0 | 0 | 0 | 9 |
| ce0da7084197b2ba639a63cdce8e215f  | 0 | 0 | 0 | 9 |
| 1d55f368ac607b25f678d0822c046d5c  | 0 | 0 | 0 | 9 |
| da483f389a217ed6fcd879745f67dbe3  | 0 | 0 | 0 | 9 |
| 497398175372149f8bed70c3b6ab08c1  | 0 | 0 | 0 | 9 |
| 0769054f3b5ed3626459594f8def42c5  | 0 | 0 | 0 | 9 |
| bca01ef732bb67058be5efd50cdfb821  | 0 | 0 | 0 | 9 |
| 1aa444074a57b7bc0abb2ea4446ad515  | 0 | 0 | 0 | 9 |
| b99c06734c57cbb0234b66a3479d1e9b  | 0 | 0 | 0 | 9 |
| 650dca75ef234d50da7696610aa21b2f  | 0 | 0 | 0 | 9 |
| 5310826d8f5db4b1169d6a8622770897  | 0 | 0 | 9 | 0 |
| 7c8a3d1e074cb0824ea5f8396e4abbc5  | 0 | 0 | 9 | 0 |
| b321803379c2341ac84a2f38c9a28d52  | 0 | 0 | 9 | 0 |
| 1030985b81af6a8cf480d01f69fb86ae  | 0 | 0 | 9 | 0 |
| fb9a71fd495884b61567849cb5fec6db  | 0 | 0 | 9 | 0 |
| f25f032a39178154b08c9e43e2a820df  | 0 | 0 | 9 | 0 |
| b7e9b5942dff89b2bcc64b3263e14694  | 0 | 0 | 9 | 0 |
| 77ea63de443da919181f287f5a6690d7  | 0 | 0 | 9 | 0 |
| 784fbe99e513ee3424abc5474e4c1f30  | 0 | 0 | 9 | 0 |
| 60fe88b1b44d8bf17e1644854469401c  | 0 | 0 | 9 | 0 |
| 2184443895f51071837d6c5bf165860f  | 0 | 0 | 9 | 0 |
| c894541cc2d5d3a200b0d2730cd662df  | 0 | 0 | 9 | 0 |
| 403befb5ac335c053e896497c07007b3  | 0 | 0 | 9 | 0 |
| 7f6e724688a75fed554501c094a1f63b  | 0 | 0 | 9 | 0 |
| a1f787437e90def1c1ad2e5bbb766fae  | 0 | 0 | 9 | 0 |
| c2ae9f021a2ceee9d667b8827eaa5c98  | 0 | 0 | 9 | 0 |
| 060d553fb5182a91e5fa2c5b87680331  | 0 | 0 | 9 | 0 |
| dab2325e89859f8620f85a9726ad3955  | 0 | 0 | 9 | 0 |
| a371e1dd61de91af592ea46d988b29e1  | 0 | 0 | 9 | 0 |
| be9e7e2786b3ae134712e7b6bedc2259  | 0 | 0 | 9 | 0 |
| 4a6a4887ef5e7bb7c9f031624f7d5820  | 0 | 0 | 9 | 0 |
| d9579eb73c71b394145d84fc0615698a  | 0 | 0 | 9 | 0 |
| 0e507f9b1d729a1361945e9f3fb543dc  | 0 | 0 | 9 | 0 |
| 64a01eae0ff9fa647e0e97ecb2fe4bb1  | 0 | 0 | 9 | 0 |
| f0aa7ef096d7a9e723c852c78ca36deb  | 0 | 0 | 9 | 0 |
| 2cc1f26dbbfe858e0efbc2a9519b6095  | 0 | 0 | 9 | 0 |
| b4fb5d346a232b76540ab1090244b637  | 0 | 0 | 9 | 0 |
| 4ccc24b28da1e4bdac28ae702b439a93  | 0 | 0 | 9 | 0 |
| ebdcafeb6d58f7d7e7ecbc4b9295a6b3  | 0 | 0 | 9 | 0 |
| ef9b184ec490c8d88d6932d6f6729973  | 0 | 0 | 9 | 0 |
| 7b4215571ccf5b76165e7c2c0f05ed93  | 0 | 0 | 9 | 0 |
| a76eee4e22308b45c648a4b1ce42ae50  | 0 | 0 | 9 | 0 |

|                                   |   |   |   |   |
|-----------------------------------|---|---|---|---|
| 6f6c09a5f94f86209ec9643553527cb4  | 0 | 0 | 9 | 0 |
| a00796bbada1e69d165d1755af297679  | 0 | 0 | 9 | 0 |
| d9a793b1f204d51bdf9acdbc7e331f62  | 0 | 0 | 9 | 0 |
| 83245181875e9c3cd341c8f83b08a6f8  | 0 | 0 | 9 | 0 |
| 098384bd1b9666757c3f0dde146a2d1f  | 0 | 0 | 9 | 0 |
| bb746c95364b54bd5b5b54b42ff3e6ee  | 0 | 0 | 9 | 0 |
| 8f52c4252e0bd2030f81370f6c69d44b  | 0 | 0 | 9 | 0 |
| baee61311ea64139382a2282b00c0a5d  | 0 | 0 | 9 | 0 |
| ce12938fd8b3cd4135efb8a58f6ee267  | 0 | 0 | 9 | 0 |
| 4ad8cbc07ad239933ebbf29e1b913db5  | 0 | 0 | 9 | 0 |
| 2fd08a38c35f76360adfde758cbcf21e  | 0 | 0 | 9 | 0 |
| 7f060415777aabe96608932828731c8f  | 0 | 0 | 9 | 0 |
| b4ad376ede567d6d1b88f3b492ff89b4  | 0 | 0 | 9 | 0 |
| 16043da275af0cfe5569ef85adfe5b8c  | 0 | 0 | 9 | 0 |
| 10c84eb7c48c4b6bf0f12af44c132837  | 0 | 0 | 9 | 0 |
| 28ed39497c9f48ff13161278a98bb516  | 0 | 0 | 9 | 0 |
| 65546d07fd7421f2c6b9e925dcde6c50  | 0 | 0 | 9 | 0 |
| 7d73b2eb5386715e4e3e16f13f8c3185  | 0 | 0 | 9 | 0 |
| 2268cd08fe758774472028a6253f5c48  | 0 | 0 | 9 | 0 |
| b6d20c3ccdf0585e8d0415a9daed37b9  | 0 | 0 | 9 | 0 |
| 1f36e63d32a8ed9310f4163416b0d849  | 0 | 0 | 9 | 0 |
| bbf730d4d85f4f414f8e8a53cefb24bf  | 0 | 0 | 9 | 0 |
| 6bb82c518ccc24574a3d082328dfffe96 | 0 | 0 | 9 | 0 |
| 81d9fec8cc93ef15d9a56e6f1a553fb4  | 0 | 0 | 9 | 0 |
| 9fa3c0df41010a0c307dd34eef352298  | 0 | 0 | 9 | 0 |
| cdc18d2360954e917b324c124362e53d  | 8 | 0 | 0 | 0 |
| c9f83a4d76777382213624ed687b2688  | 8 | 0 | 0 | 0 |
| d4d0e0459e712187fae5903a95f5b018  | 8 | 0 | 0 | 0 |
| 1b33254676fdbba0dc7fa0ec78c6040cb | 8 | 0 | 0 | 0 |
| 368e2b2eaf2764585246dd47d131a4aa  | 5 | 0 | 0 | 3 |
| 71d1f704a7beb4d6b2c39b19b702cd05  | 8 | 0 | 0 | 0 |
| 950734e9db22fa378f3f5d57697e0159  | 8 | 0 | 0 | 0 |
| 718e9b712b97b902f5f9c1038aafaae7  | 8 | 0 | 0 | 0 |
| b0e2a2b639e2360cb295be87d79a2e78  | 8 | 0 | 0 | 0 |
| ee5a4ded9040e50e56c0c1be05f5642b  | 8 | 0 | 0 | 0 |
| ab0ce4dde1eeb1e157d082193d5de685  | 8 | 0 | 0 | 0 |
| eaa9275b97fc0f2b3be2e5629319b9ee  | 8 | 0 | 0 | 0 |
| 5c8582d8117c2afe9d4ad406d0b95193  | 8 | 0 | 0 | 0 |
| ac207e115835537acd73352b81f676ce  | 8 | 0 | 0 | 0 |
| 90570f19be19398fe119c607cbd7b67f  | 8 | 0 | 0 | 0 |
| 36f88f6c7b9e9a37139439f52a549c80  | 8 | 0 | 0 | 0 |
| 1f6286d1c8604fb3464eddb7b5fffb91  | 8 | 0 | 0 | 0 |
| 2a0a6e9f040f560c5037bdf89d51ffc3  | 8 | 0 | 0 | 0 |
| ec7c503c5e8fb1426fd4679b407ccec1  | 8 | 0 | 0 | 0 |



|                                  |   |   |   |   |
|----------------------------------|---|---|---|---|
| 1637c9d28b5e6d39a07172a2b3e773b9 | 4 | 0 | 0 | 0 |
| 8ac5c8a73781d19fcd6167a867a822fc | 8 | 0 | 0 | 0 |
| dde711d344302aa32c06725f2500c1b5 | 8 | 0 | 0 | 0 |
| e45393e048b6b058d0d1e1e848d6616a | 8 | 0 | 0 | 0 |
| 227fb1502d0565a489de823dff071ab0 | 8 | 0 | 0 | 0 |
| db569e23eed623559a3be54507652bb0 | 8 | 0 | 0 | 0 |
| ee0c1475c5b01529083f01911185f428 | 8 | 0 | 0 | 0 |
| dcb96a7f2f9cdec7081121249e80b678 | 8 | 0 | 0 | 0 |
| 49955c3fea1d98fc7a9b650306eca452 | 8 | 0 | 0 | 0 |
| 9c196d33d379e5610d8ec0559b19ffbe | 8 | 0 | 0 | 0 |
| 7918e978782f389b591902b08ba2ec59 | 8 | 0 | 0 | 0 |
| 0b064a48b9858108eaf8438dd402609e | 8 | 0 | 0 | 0 |
| 9a424ec4af0c2f60f03f52172b003a69 | 8 | 0 | 0 | 0 |
| 59980da096bef6e58992db21ec28d8e8 | 8 | 0 | 0 | 0 |
| 0bf57b9ba38462fa3e790f0672388f64 | 8 | 0 | 0 | 0 |
| 8229ac43e7e00ece2f26d2e4d6f36195 | 8 | 0 | 0 | 0 |
| db50d02a1a19a56f6485cd279a253c44 | 8 | 0 | 0 | 0 |
| c816faa6a4194f58877313239177a33f | 8 | 0 | 0 | 0 |
| 7923e61adec81b358ca63ff3ebd17df7 | 8 | 0 | 0 | 0 |
| a2634eb3daa955f37a4cf0e8379cd427 | 8 | 0 | 0 | 0 |
| 7860fda521b1f23b09727722466aa2b6 | 8 | 0 | 0 | 0 |
| 8f4d78e60fc513a5f0f50873317e5c3e | 8 | 0 | 0 | 0 |
| a4747bea5b3263bed396edee63844868 | 4 | 0 | 4 | 0 |
| b14ad05a2b97136d6800398a230282bc | 8 | 0 | 0 | 0 |
| 543b8345e8fc601a5580ac34db498563 | 8 | 0 | 0 | 0 |
| 0d4aefcf077c4c349a8452e4073aa821 | 8 | 0 | 0 | 0 |
| 5f62524a63513d1737c3a761d028aecd | 8 | 0 | 0 | 0 |
| 219c54385bf9fccc76dd87a864a72aee | 8 | 0 | 0 | 0 |
| 231c9eac9f6b701cc85f1e888b185326 | 8 | 0 | 0 | 0 |
| e6462fe31c8feee7cd19f1809e6b45fc | 8 | 0 | 0 | 0 |
| a02229b0924a08799b5133e302d5fe77 | 8 | 0 | 0 | 0 |
| 56640d3e19380fa982f7decf12b484a1 | 8 | 0 | 0 | 0 |
| 34e3ce00e325094342feb327e72a2b9d | 8 | 0 | 0 | 0 |
| 5445c421ac4a2d3d52e9dedfa3872edf | 8 | 0 | 0 | 0 |
| e7efb9b89cfb6d3c3bde1113beaa796c | 8 | 0 | 0 | 0 |
| e2fdbbdcfb61ffea47ca5b92772bd6c9 | 8 | 0 | 0 | 0 |
| b5c1d291902db340107ed306a835e50d | 8 | 0 | 0 | 0 |
| a603f14097636ee20275b17fe6a2ae28 | 3 | 2 | 0 | 0 |
| 98824f9367e0c106498071080ef34fe9 | 8 | 0 | 0 | 0 |
| ed7fdb809936e080f904dbd57cad611  | 8 | 0 | 0 | 0 |
| b3e84b08061cabf47ad2b39d032e6bda | 8 | 0 | 0 | 0 |
| dd196cf9d3b4ec57413461fffc741537 | 8 | 0 | 0 | 0 |
| f5f481ce129cab8c5978a48afd072ca7 | 2 | 3 | 0 | 3 |
| 8347b48479d2fde2197e8e8ca3c325d2 | 8 | 0 | 0 | 0 |

|                                  |   |   |   |   |
|----------------------------------|---|---|---|---|
| 16a1cd31c03ec0b4160c9f74438305b1 | 8 | 0 | 0 | 0 |
| b1b4c97d8cbee489d34e085f33e38bc9 | 8 | 0 | 0 | 0 |
| d6e45c76d5ddcae0057978a6e07c39aa | 8 | 0 | 0 | 0 |
| 8f845d8e5266cbc5ea3f524c4a21b399 | 8 | 0 | 0 | 0 |
| 5879445d5c26d1901706c96b949c22b0 | 8 | 0 | 0 | 0 |
| cd23284221f9b5301981914a8be665f7 | 2 | 3 | 0 | 0 |
| 922a26c899b3546da881d7b6d4350d04 | 8 | 0 | 0 | 0 |
| 315a9be0ddd2fc26d4571c3a52cbca3c | 6 | 0 | 0 | 0 |
| 91e2a9afc85e4014fff31dac97d45114 | 8 | 0 | 0 | 0 |
| bee986aa8b5b04b9187149c9221e1c1e | 8 | 0 | 0 | 0 |
| 11c9050d998ade4e5b3a98e98f4a9c3d | 8 | 0 | 0 | 0 |
| de10bdd6e14c36fd6a1cce28134cb8ac | 8 | 0 | 0 | 0 |
| f449c3608b753e9f71e97251b6465002 | 8 | 0 | 0 | 0 |
| 07954bfe04f6c7241235c944ac54491c | 8 | 0 | 0 | 0 |
| 40733c349bb72e5a657ae7f501f86eaf | 0 | 0 | 0 | 0 |
| 39685f01e513cecfca92441dc0bc4632 | 0 | 0 | 0 | 0 |
| 791adlee9bc062054f841e94510513c4 | 0 | 0 | 0 | 0 |
| d5f55dbe726479941205f2bc31366eb3 | 0 | 0 | 0 | 3 |
| d2d444fd54bca80fbe5fa5a4c9be57fc | 0 | 0 | 0 | 0 |
| 30edcecbc1b900942b427baec1ebc826 | 0 | 0 | 0 | 0 |
| 50aef982258ed0b3031eb8409b1bd9c1 | 0 | 0 | 0 | 0 |
| 9b57c9128d82206eab4a072441c9547d | 0 | 0 | 0 | 0 |
| 5afab535ee833ab5ba9845cd63006aff | 0 | 0 | 0 | 0 |
| 1fe16a2921cd1230e3c5cfd1843c17c  | 0 | 0 | 0 | 0 |
| d8c2c4e83cbb3fd28a49f83bb21ebf8c | 0 | 0 | 0 | 0 |
| 11d16a7a43aee7e989247c943b466d9c | 0 | 0 | 0 | 0 |
| 77a866f7aa97dd7988c139eab0f3844c | 0 | 0 | 0 | 0 |
| cc99f70bee6b6129d16d10e88bd51a7f | 0 | 0 | 0 | 0 |
| eb6a6a277e9dc51c35972d5c2358a813 | 0 | 0 | 0 | 0 |
| c24248bf74bae474e1ae7340faf8f6ce | 0 | 0 | 4 | 0 |
| ce04176c426647f8fc666adac82abd6e | 0 | 0 | 0 | 0 |
| bccfb14aa752663a1234852971367951 | 0 | 0 | 0 | 0 |
| 117318f7b56cc4e00ea05773c5874bc1 | 0 | 0 | 0 | 0 |
| ff08790e6f5d60e1cbf6f7da5f2ab092 | 0 | 0 | 0 | 0 |
| a1b989f13c939f22269ad1b8d3d3881a | 0 | 0 | 6 | 0 |
| fb0ab25e5c99727ea37379b2775fb62a | 0 | 0 | 0 | 0 |
| 66266ccbe6d34f199fdbafff3f47502f | 0 | 0 | 0 | 0 |
| fb47c932308f46d970a239ca061b871e | 0 | 2 | 0 | 0 |
| 22b5c13fd7002d4ec2bf3a79726289fe | 0 | 0 | 0 | 0 |
| fbe67be588e1bdca7f2fdf565b91451f | 0 | 0 | 0 | 0 |
| 073a880404705e1d5da0941092b732e4 | 0 | 0 | 0 | 0 |
| c7c37d162ec3dbdb05aebb971d22dd5d | 0 | 0 | 0 | 0 |
| 417ec2806ceddd4bd4921e5a21d13e80 | 0 | 0 | 0 | 0 |
| 8e603883e89c946cfb0dfc7502ec01d3 | 0 | 0 | 0 | 0 |

|                                  |   |   |   |   |
|----------------------------------|---|---|---|---|
| 34e3086cf3c2ae430d94cef8092327e9 | 0 | 0 | 0 | 0 |
| 372ffc83302bcb11d041570cfe1cde06 | 0 | 0 | 0 | 0 |
| 78006240d972fab355d3a8943967826  | 0 | 0 | 0 | 0 |
| 4ab339fd4a07ef400dcc73d70a9b4be8 | 0 | 0 | 0 | 0 |
| 471ff8fb90926046002c461f9199ee78 | 0 | 0 | 0 | 0 |
| f4136dce6b52c7c14d4d4ec9e01b40e3 | 0 | 0 | 0 | 0 |
| ae8555b8cbf3d50778b5b1482792b291 | 0 | 0 | 0 | 0 |
| 6abb75e00287735be4e52ed320bae4c2 | 0 | 3 | 0 | 2 |
| 1cba70a4c8b404e90be638347f1ca040 | 0 | 0 | 0 | 0 |
| 971f624fbf3fe938fb5f37116142117a | 0 | 0 | 0 | 0 |
| 9649d24bd585cca61794a964614e270d | 0 | 0 | 0 | 0 |
| f3d88e344822394994c8c97d28573462 | 0 | 0 | 0 | 0 |
| 59999973cc1198e184f7da304fa1ce1d | 0 | 0 | 0 | 0 |
| cc9d650fc5e1a1c9283ab15145494972 | 0 | 0 | 0 | 0 |
| a7f1b31a73a5f0af13eb0db378e490b8 | 0 | 0 | 0 | 0 |
| a88074ffc74bef9c1e8ef546698292d6 | 0 | 0 | 0 | 0 |
| 7db95eb6ee44d56f7aebcd9b1469711f | 0 | 0 | 0 | 0 |
| 86248d0ff2cc129fe63719fbeb8065e8 | 0 | 0 | 0 | 0 |
| 1255676a7ad1b67daf9469808eda3ac  | 0 | 0 | 0 | 0 |
| 7127f00c7ed4f95489f14492b87aeb4a | 0 | 0 | 3 | 0 |
| 776e52c90d2327c1eedb3c3f2f4340d0 | 0 | 0 | 0 | 0 |
| efe84f9b56b4ce250b87f1f2e1a69f01 | 0 | 0 | 0 | 0 |
| 1892e7d303d8d0586a38109110d1d9a9 | 0 | 0 | 0 | 5 |
| 79eb08421df9daf7b029d9e4915626d3 | 0 | 0 | 0 | 0 |
| d0d0ad207ba28b7c2482cd533c9c8dfb | 0 | 2 | 2 | 2 |
| f7e1be607cf99147b9d53768ae29c93f | 0 | 0 | 5 | 0 |
| b0930a16b94a8fc5ed5ecfddf3afe893 | 0 | 0 | 0 | 0 |
| b3e3f65f747a75d6b0483e15b4e8247e | 0 | 0 | 5 | 0 |
| a5840e9bd83a64f98f10be324067941d | 0 | 0 | 0 | 0 |
| d9804c36034526ca19fdb9e0eada1ac2 | 0 | 0 | 0 | 2 |
| 7f3dae78f87e218688ce109d3bd34cfb | 0 | 0 | 0 | 0 |
| 07339ec0f113261c7e6f822d993c0096 | 0 | 4 | 0 | 0 |
| 1f854ac0c10f616b6cdbdf3612cfde40 | 0 | 0 | 0 | 0 |
| 3a6207d45b32e7e7bd122a70140a47b3 | 0 | 0 | 0 | 0 |
| 8ad8f75ffd5cd7f2992a90e4a95affbd | 0 | 0 | 0 | 0 |
| 07207e7c7ff8f774c0596e4c6aeeb8f5 | 0 | 5 | 0 | 0 |
| b6fb6d83daa048be3d9929c8bb491868 | 0 | 2 | 0 | 6 |
| 0a73d5614682b34599d14c6cc722fef6 | 0 | 8 | 0 | 0 |
| c8262ff56ec071b289ab626f8ef8b0ee | 0 | 8 | 0 | 0 |
| ecac2eee7616a77c90296ff9fc2c4031 | 0 | 8 | 0 | 0 |
| 440b3a8e8a03f046c22ce1f740d763fc | 0 | 8 | 0 | 0 |
| 0ba47554e4d9d0eb99953cf3fea8100a | 0 | 8 | 0 | 0 |
| 3acf4e056a9df6091fe260e44124bc35 | 0 | 8 | 0 | 0 |
| 40969bc4baa69e66baa73ae4f35dfc50 | 0 | 8 | 0 | 0 |

|                                  |   |   |   |   |
|----------------------------------|---|---|---|---|
| af7a59b748f8ce28db9f42ca221797ff | 0 | 8 | 0 | 0 |
| b36042bb40c3f6d1c1cefce7ff86778f | 0 | 8 | 0 | 0 |
| e2b706a55457a9ed81610b772c170454 | 0 | 8 | 0 | 0 |
| d5a187de2081c0816c886beae45753e6 | 0 | 8 | 0 | 0 |
| 9fab61373156946b078ba26e24054575 | 0 | 8 | 0 | 0 |
| 4e9c6a9398a3f61d5b0d9c26e7190f8e | 0 | 8 | 0 | 0 |
| 81f2299c5f2b7aa46b3f0dba1fa761c8 | 0 | 8 | 0 | 0 |
| ecab791054a5e79b8d28dc7818fc84d2 | 0 | 8 | 0 | 0 |
| f2aefd76f4bcd3ee35943453d35609b1 | 0 | 8 | 0 | 0 |
| 1ef466a4e93f372feb3ea0eed0d91b80 | 0 | 4 | 4 | 0 |
| 0eb39a5430103742b9adae147ed4771e | 0 | 6 | 2 | 0 |
| b0d4147aaf08494422edefb5eedeca8f | 0 | 8 | 0 | 0 |
| 85c86cf9b82730e019441833b5331497 | 0 | 8 | 0 | 0 |
| 24ee119e34fd6ab04bdfe3250f8e4cac | 0 | 8 | 0 | 0 |
| f635c9f3c030f8429d0c4bd09c860f4d | 0 | 8 | 0 | 0 |
| 1ba99b051cf76d179637b22009fa6666 | 0 | 8 | 0 | 0 |
| 1efe73f6ee7cb7f5732cfcfc41c5badf | 0 | 8 | 0 | 0 |
| f6df6e8a9dbf4bf8e5d251bae50b5233 | 0 | 8 | 0 | 0 |
| d825892973cef70ec9306302f8b10ea6 | 0 | 8 | 0 | 0 |
| 258804af27afe17c7cc3aa961e576d10 | 0 | 8 | 0 | 0 |
| 0707c3c28d435804c555e69c82b3e0c6 | 0 | 5 | 0 | 3 |
| 2ee709c0f03a18efb3134a8dad288adb | 0 | 4 | 4 | 0 |
| cbb68089ca2b52ac845335eb6b273b04 | 0 | 8 | 0 | 0 |
| 6387215b8f4b660c12a37732d51d97f5 | 0 | 8 | 0 | 0 |
| 979d02b4e36770ef4ea27dced5da5663 | 0 | 8 | 0 | 0 |
| 76167afdf26e399a6de6352ceff400f5 | 0 | 8 | 0 | 0 |
| c0ec468258200aec93700d9d51c7eacf | 0 | 8 | 0 | 0 |
| 51f360d562870f8370f8975edd8b5dd3 | 0 | 8 | 0 | 0 |
| 2b2b9e382588f0b5f08f20664f7ce728 | 0 | 8 | 0 | 0 |
| 34af13573fcea793b2b64c9ba359b213 | 0 | 8 | 0 | 0 |
| 335cacc545e1042e1bca4d9cf709426c | 0 | 8 | 0 | 0 |
| b2b09d2b63fc79c25c3f67bb0e5473c4 | 0 | 8 | 0 | 0 |
| c3217841b7a3ea42684c7333f22ec8f2 | 0 | 8 | 0 | 0 |
| 2f75381d76bf33a4f989b6b5e03209a9 | 0 | 8 | 0 | 0 |
| 58d0aa3442b0eb8416090a629325cee2 | 0 | 8 | 0 | 0 |
| bb6c777c3c54f7a0fa106060d14cb1dd | 0 | 8 | 0 | 0 |
| ea478c5670dc86bf7c4f7db4256628b2 | 0 | 8 | 0 | 0 |
| 1ea4a5f0fbef331c1b9ef82f3da53b94 | 0 | 8 | 0 | 0 |
| 7c0e0136dc007773a7bda1d2d924f0b5 | 0 | 8 | 0 | 0 |
| f43057a0178054e0a9f2097de0b8e63c | 0 | 8 | 0 | 0 |
| f4be93d12a47db729dd8f7249d162547 | 0 | 8 | 0 | 0 |
| 411f487565051d61b34ba2ac1bfeaa5b | 0 | 8 | 0 | 0 |
| 87a90d0afa7cf92a2ec8393c8859382c | 0 | 8 | 0 | 0 |
| 6af61876151167c516081678b9d806d4 | 0 | 8 | 0 | 0 |

|                                  |   |   |   |   |
|----------------------------------|---|---|---|---|
| 31ce1bda3b2c1089cc75d87bde6a8404 | 0 | 8 | 0 | 0 |
| 85aee5809b3a8bb1fb0dd29eb3530174 | 0 | 8 | 0 | 0 |
| 969052065c7cb6b751e8fc03540083f4 | 0 | 8 | 0 | 0 |
| 6eb5ecae27fa3f97036f5c4929eccdf1 | 0 | 8 | 0 | 0 |
| 77a36a73ee934312f3c2dd8589a43dfa | 0 | 8 | 0 | 0 |
| 31ffc7b629b35db0ceb894a68778a680 | 0 | 8 | 0 | 0 |
| 665d6ae30c95839c0eb32e193d4b3e36 | 0 | 8 | 0 | 0 |
| f87da7171c6a4317562185537573cb19 | 0 | 8 | 0 | 0 |
| 7ea4a1f32c6204dd32f9247211187f8d | 0 | 8 | 0 | 0 |
| 72aeb51aa86bae5f09cd12ec634ff276 | 0 | 8 | 0 | 0 |
| 4199ec33e2b5c52d77ce598fbf223ed5 | 0 | 8 | 0 | 0 |
| 9a40644f379c53010ba42973e6fc01a7 | 0 | 8 | 0 | 0 |
| 6154ed81cb595f003baea4dab75c5cc9 | 0 | 8 | 0 | 0 |
| 5cc4b3300a17e45e0374d33baffa9e8c | 0 | 8 | 0 | 0 |
| 28f4977773f9f695e50fc1f2b9199e89 | 0 | 8 | 0 | 0 |
| 9688032d1e303d68a9d152d3c6029baf | 0 | 8 | 0 | 0 |
| 4631a9a7d55a2fd388d33a4c7074db83 | 0 | 8 | 0 | 0 |
| f37b58aed1c822085998d35a9eb73623 | 0 | 8 | 0 | 0 |
| 1bb36103519e3371d68410c645b08e49 | 0 | 3 | 0 | 5 |
| 19d9b1759e6c729713dda7966d95d651 | 0 | 2 | 6 | 0 |
| 8aedd1b03601e70966e946005839ca4b | 0 | 8 | 0 | 0 |
| 7b5d7f6ac60a6efe8f848f0c61a8b595 | 0 | 0 | 0 | 8 |
| a14d07d0f4948e5fab764ce39c9c3e4c | 0 | 0 | 2 | 6 |
| 4ea6fe071607890d9b3c621d8183ba8c | 0 | 0 | 0 | 8 |
| 9ce3a2aad65612be9bdda1795472f933 | 0 | 0 | 0 | 8 |
| 7da8877032952a3fdc6db1757e9e9cd8 | 0 | 0 | 0 | 8 |
| f7fff53fddc28e7fb8ba80c6104f49b2 | 0 | 0 | 0 | 8 |
| 954b53e76ba8778ff7f4991644f1d539 | 0 | 0 | 0 | 8 |
| 2b730e3dca3d95faf6338d520e45bdc6 | 0 | 0 | 0 | 8 |
| ddd26bf1c1929571c2513c8dc75b0266 | 0 | 0 | 0 | 8 |
| c1c6ed7fb7a49c5201b8a7ff1841dbe5 | 0 | 0 | 0 | 8 |
| 3a115d7df9cf71cd76a7c320da063caf | 0 | 0 | 0 | 8 |
| a368aceb1636b7d2c101f11c369c3bce | 0 | 0 | 0 | 8 |
| 933891df0fee1483226ea679fd3a970f | 0 | 0 | 0 | 8 |
| 31d638a03c4a363136d21033cc0e0002 | 0 | 0 | 0 | 8 |
| f617e8d017927aab6792be81b7dd1940 | 0 | 0 | 0 | 8 |
| 66de40cd0fa682608c191df8735fa13b | 0 | 0 | 0 | 8 |
| 621505e296afd967a5ae4b92fc49ccc5 | 0 | 0 | 0 | 8 |
| 3d2f170aadd218e4c4ceb917cb99337d | 0 | 0 | 0 | 8 |
| 18de4e3c95fb27d255fc4d1ca10792b6 | 0 | 0 | 0 | 8 |
| 1874d2188a0cdb95e09daae011605ac4 | 0 | 0 | 0 | 8 |
| 88cc4ce4f9968fb9ba9ddb98d5dffed1 | 0 | 0 | 0 | 8 |
| b396fa515a4ce190316834ceb8fcf795 | 0 | 0 | 0 | 8 |
| 7d7573eb1aa64893010995a0042b6ac7 | 0 | 0 | 0 | 8 |

|                                   |   |   |   |   |
|-----------------------------------|---|---|---|---|
| ed918ff8cf24692d865b6590c259277b  | 0 | 0 | 0 | 8 |
| 9b800308d4dbcce28a2bf3d1313224c6  | 0 | 0 | 0 | 8 |
| 88229b6664f752da891fd8e3d4db500d  | 0 | 0 | 0 | 8 |
| a81e4b0ce9015c801617eaa740a6eb18  | 0 | 0 | 0 | 8 |
| 50e8430da72df256b41c69cb27df3fbb  | 0 | 0 | 0 | 8 |
| 704c5e8dd545fd6786bde10df33a88cb  | 0 | 0 | 0 | 8 |
| 16bee5377fdb2f327986c499d694a969  | 0 | 0 | 0 | 8 |
| 26d58ee5d1281721bd4ea7622132bbb3  | 0 | 0 | 0 | 8 |
| c93a29ec494dee4657f81f9fcea523ec  | 0 | 0 | 0 | 8 |
| a5c0f9eb30b9f187b78f9d210e30d00f  | 0 | 0 | 0 | 8 |
| 8334b40513a0461fee3ed7ceb594f3ef  | 0 | 0 | 0 | 8 |
| 94347cf1fa69bbb1a50f103ad875421a  | 0 | 0 | 0 | 8 |
| ce0968a492261a8d107fe50612fe7089  | 0 | 0 | 0 | 8 |
| fd2a57d97f6a871ce4a801a9ab1270a8  | 0 | 0 | 0 | 8 |
| 1114b0d7937aad360ffd9a2d8ee405d9  | 0 | 0 | 0 | 8 |
| 707eb7738b84146af91fc6b379867727  | 0 | 0 | 0 | 8 |
| 2877112f118deeb6c4d6070a96e582af  | 0 | 0 | 0 | 8 |
| 090d7d44022616aa743984d53dadd799  | 0 | 0 | 4 | 4 |
| 4ae2cb5dd18d15d65e73d572b98f851b  | 0 | 0 | 0 | 8 |
| 4c74ebfb8454ebb01fd13bfd70ca2da9  | 0 | 0 | 0 | 8 |
| 96f66c95d9d97d5ae2cf323fd206e70c  | 0 | 0 | 5 | 3 |
| 0cd3cb03d1272d8f66f2b6b00ade0b0f  | 0 | 0 | 0 | 8 |
| 23ff8778bc1102c13a9193f68ac0b6c4  | 0 | 0 | 5 | 3 |
| 4eb10363701e463c4e76b5799400263e  | 0 | 0 | 0 | 8 |
| d62c962595ded984272ced02034eb3b4  | 0 | 0 | 0 | 8 |
| 127ed62c6be8a18f9d88d7c52be7045a  | 0 | 0 | 0 | 8 |
| 5b26ff73d67e765c6874bc1c87633e88  | 0 | 0 | 0 | 8 |
| c859cdb37e0e53106c44ba9a077fb245  | 0 | 0 | 0 | 8 |
| 9580308b308c6dfd3874b17e5dd991e9  | 0 | 0 | 0 | 8 |
| e3d03f209084edfa34a84eae36adad02  | 0 | 0 | 0 | 8 |
| e66ab5ee5f3f5dfbd0bf380d0853a3d8  | 0 | 0 | 0 | 8 |
| d9f937b0e88247038e932c0e509b016c  | 0 | 0 | 0 | 8 |
| 407d9e6610630b7158a231f810d3b6d2  | 0 | 0 | 0 | 8 |
| 1e8de5407812af87b66fa659df50c0ca  | 0 | 0 | 0 | 8 |
| 528f3ce382200c40d4736efe4710c9094 | 0 | 0 | 0 | 8 |
| 156fe999ae6460bcbb73c8d5b6dd0e64  | 0 | 0 | 0 | 8 |
| 7a88f514bb3d4043f584cd8e40195ff1  | 0 | 0 | 0 | 8 |
| 84d8c23272d8230c639578fd498b43bd  | 0 | 0 | 0 | 8 |
| 7cdfb25bcbbcdb92ced9ede5cb42319d  | 0 | 0 | 0 | 8 |
| 43d9d82afab52f9fa56bc0e73d23d333  | 0 | 0 | 0 | 8 |
| 5dac9ae3cb8b49dd45db4c4e9b213b57  | 0 | 0 | 0 | 8 |
| 42fa1fedf3103babd77bbf29ba719b2e  | 0 | 0 | 0 | 8 |
| 4157dd0ceeabb54565b5df1dcc99739b  | 0 | 0 | 0 | 8 |
| d325fd3d28bfeafa3c30966dd71a88155 | 0 | 0 | 0 | 8 |

|                                  |   |   |   |   |
|----------------------------------|---|---|---|---|
| 57bb761802e071b330bf33ba1e5ef6a0 | 0 | 0 | 0 | 8 |
| 373391d40ef6969327f8f34e4f39d243 | 0 | 0 | 0 | 8 |
| c3d6f501a33233098c3471601c5d4d6c | 0 | 0 | 0 | 8 |
| b5a14b4959d767b47e26f42738ba28e9 | 0 | 0 | 8 | 0 |
| a21e1afb663293adc409ba07e0b8f453 | 0 | 0 | 8 | 0 |
| 07576716afb323460d3744a44b812bb6 | 0 | 0 | 8 | 0 |
| c6653369c48368f3ab9a3e905cafcbda | 0 | 0 | 8 | 0 |
| 6880355101c347123779b933b1c5fb10 | 0 | 0 | 8 | 0 |
| 82b080b545eb1c73f6b2a9f43e12407a | 0 | 0 | 8 | 0 |
| eecc72809f329dee76329c77fe111861 | 0 | 0 | 8 | 0 |
| 51ce3b0e67e7df1abbc8d6ab9bb42d51 | 0 | 0 | 8 | 0 |
| 6e81373d0041f1bbaf766e007aa70e31 | 0 | 0 | 8 | 0 |
| 92a40eb1922eb1f6076ea8952583f1fc | 0 | 0 | 8 | 0 |
| d75af47b379000fc8a9da061d2031a87 | 0 | 0 | 8 | 0 |
| c9dd207a8aad336ad1b620ebfdf7c401 | 0 | 0 | 8 | 0 |
| 448713ae6c0a1ee3659bfebd66925945 | 0 | 0 | 8 | 0 |
| 42063fce4346d36f2a4f0abf865b6721 | 0 | 0 | 8 | 0 |
| 4eda71068c0e1332b13ccde8ee6d33e1 | 0 | 0 | 8 | 0 |
| 4698b922342a4c0a5c36656abe4cffb2 | 0 | 0 | 8 | 0 |
| 0660dedc6ba82f1c3e8101fd60918e42 | 0 | 0 | 8 | 0 |
| dfa150778952d062655cb8d6288d1702 | 0 | 0 | 8 | 0 |
| 2e216e673645a44e647ee2f18b16e28f | 0 | 0 | 8 | 0 |
| 228ea87bfcd4b7bc74753d492d197558 | 0 | 0 | 8 | 0 |
| eaf3b1f9ea3b9e34a3a57a29432950b1 | 0 | 0 | 8 | 0 |
| a35ea6cf1d3ccef4e4dfcd993e5b4a37 | 0 | 0 | 8 | 0 |
| 8d0e647f6cfaf6abf4a2ba3875245083 | 0 | 0 | 8 | 0 |
| 8103c7c6f6602633512eeac8ad1c523d | 0 | 0 | 8 | 0 |
| 3f62da421bd038f7054fe08c6093a644 | 0 | 0 | 8 | 0 |
| 41a7eeae62d5cb815268c465ce31d273 | 0 | 0 | 8 | 0 |
| 5db47c31c1383d650ce36f6794f20860 | 0 | 0 | 8 | 0 |
| 948b4f87bee7bc622bc8428615ea8dd1 | 0 | 0 | 8 | 0 |
| 8d0f15bd52fc132583a967a261100c66 | 0 | 0 | 8 | 0 |
| 3e927aa7f76ef276c176656dd48b1ef1 | 0 | 0 | 8 | 0 |
| 09947606831667d6e4ac7ce0ac2089eb | 0 | 0 | 8 | 0 |
| 58684441eae9cc02a702e469a777816b | 0 | 0 | 8 | 0 |
| 575d5ae3402930549f2bcd4c33abf530 | 0 | 0 | 8 | 0 |
| e84617de7732804e7f2134ab89a4419d | 0 | 0 | 8 | 0 |
| 02a0abafa14714e9fe00c65236076b04 | 0 | 0 | 8 | 0 |
| 7dd4e472d86fba64a747111399cf9585 | 0 | 0 | 8 | 0 |
| 7340dc77daa79a44fd5950db23e78880 | 0 | 0 | 8 | 0 |
| 72115ab0bc305a11d87cf64763e77937 | 0 | 0 | 8 | 0 |
| b2b4a68bb2c267848310389f2ff53d67 | 0 | 0 | 8 | 0 |
| a77f1dd5adec8c2185402d9aa179e6c6 | 0 | 0 | 8 | 0 |
| 683f2f1a5c53dc453bd705a7febb4039 | 0 | 0 | 8 | 0 |

|                                   |   |   |   |   |
|-----------------------------------|---|---|---|---|
| c8d0dbc4a0160988841b3c88746fcd9f  | 0 | 0 | 8 | 0 |
| cead40621bd874447fa2618918292e1a  | 0 | 0 | 8 | 0 |
| 2c5dad59ecc0dfcf0fc5fa2dd2ce084d  | 0 | 0 | 8 | 0 |
| 65f4063bb51736f8239f7831ccac7f2f  | 0 | 0 | 8 | 0 |
| 0528b9b44d8368f4106c820e5ae10e06  | 0 | 0 | 8 | 0 |
| 213240be21f7769b25618fda38f2acc1  | 0 | 0 | 8 | 0 |
| 7ccbe79365adeedd7708497d5b655a70  | 0 | 0 | 8 | 0 |
| c28f9843120143f9028598f151b91a6b  | 0 | 0 | 8 | 0 |
| 2b30fbb503b757923e4099aff9c401b9  | 0 | 0 | 8 | 0 |
| a2bdffc1bdd9f7cc3fa6f0ec36de7d565 | 0 | 0 | 8 | 0 |
| 5cea5b8f216d7f98d6e00eca99a0b0bc  | 0 | 0 | 8 | 0 |
| 15e0bf2fd0a670a85871a7216ea1f8df  | 0 | 0 | 8 | 0 |
| 515ca1ea2ff6b31ee922b28b21f466e6  | 0 | 0 | 8 | 0 |
| edfaf374a0e99f3b476403d67483c913  | 0 | 0 | 8 | 0 |
| 7fa75db3936c9b530d7f45455f213232  | 0 | 0 | 8 | 0 |
| 7b27cb32f2e18aaa2352f4f3cff9873c  | 0 | 0 | 8 | 0 |
| 52751a42c36e0d98f55c814790943571  | 0 | 0 | 8 | 0 |
| cfb3bbb1ddbc8ac1a8eef89b52a8b6b9  | 0 | 0 | 8 | 0 |
| 73324ca634b18f65c53ec8480bbb8721  | 7 | 0 | 0 | 0 |
| 1cc526181dd479c91f1318e7d1fd2165  | 7 | 0 | 0 | 0 |
| 288c98a69c22571e27b46c56829a1ef5  | 4 | 3 | 0 | 0 |
| d315b4bf0fd296ce19395ed52ab8fcb6  | 7 | 0 | 0 | 0 |
| d2de11fe7161db21efff1f4c5923b061  | 4 | 0 | 3 | 0 |
| 7264b1ccf56f7c78931df9f2ee38822d  | 7 | 0 | 0 | 0 |
| ed929e032b2a654482d1799931b76eef  | 7 | 0 | 0 | 0 |
| 59377ac8befae1ae6e87deecab053565  | 7 | 0 | 0 | 0 |
| bae7cb7990033468a42770cb868dca5e  | 7 | 0 | 0 | 0 |
| 339f88a359b7df022a3499041d82521a  | 7 | 0 | 0 | 0 |
| cdd5fcf115956525bc99c9d0fe1fadc3  | 7 | 0 | 0 | 0 |
| 16b4ed2f6d073255dc72623c7a69bb14  | 5 | 0 | 0 | 0 |
| fbdb51b5a5ab744a00c98babdd8b07db3 | 7 | 0 | 0 | 0 |
| 8a940712bf74c0461c157c36807b26ba  | 7 | 0 | 0 | 0 |
| 2252a2ec0a215e2d4dbc575159111924  | 7 | 0 | 0 | 0 |
| 95ad1d7706a2f1700e371b4e00832738  | 7 | 0 | 0 | 0 |
| d32ef3fe3ee1a7339c60104a8d9b69dd  | 7 | 0 | 0 | 0 |
| acd428634e563f72de513ce1be2ab36d  | 7 | 0 | 0 | 0 |
| 378559bd93d240d7e527c37bf1fc6220  | 7 | 0 | 0 | 0 |
| 24e4b4ae10a05e26c8bd21f9dc3886db  | 7 | 0 | 0 | 0 |
| 13ea60895024cce06516e2cdc3c0388e  | 7 | 0 | 0 | 0 |
| 154d0925ec5cd5df5f8335c20ac88b46  | 7 | 0 | 0 | 0 |
| 1f87d90550db133e7b4b3a9d176d044c  | 7 | 0 | 0 | 0 |
| 9e80aa1e91f41f2a739aa092b3d5a222  | 7 | 0 | 0 | 0 |
| 79ed43ea8e78a4451176b5127a09876b  | 3 | 4 | 0 | 0 |
| b9762d30a056ece531f895b4337c03d5  | 7 | 0 | 0 | 0 |



|                                   |   |   |   |   |
|-----------------------------------|---|---|---|---|
| 9b2bfcfbf4d6d2b68b4b96f18fcd60567 | 7 | 0 | 0 | 0 |
| d7888d968729147714fd4d8af16e6cf5  | 7 | 0 | 0 | 0 |
| 6321671ea1e97dbd9558ba76bc6fcb4e  | 7 | 0 | 0 | 0 |
| 29b0d4c4a9895c7f492450a3dd9e0f77  | 4 | 0 | 3 | 0 |
| 936a16fd360490979fa482bb301eb879  | 7 | 0 | 0 | 0 |
| 832af1eeb9fb733b58490cb9e0e50540  | 7 | 0 | 0 | 0 |
| c67ccf7ec14fe684162985cc05e40313  | 7 | 0 | 0 | 0 |
| 7575c5d1e36ca75c5a8171a29077f1d8  | 7 | 0 | 0 | 0 |
| 3705587a7532d748941c8b3f65c742ed  | 7 | 0 | 0 | 0 |
| 285027b71f1b86978ba8d62864d32758  | 7 | 0 | 0 | 0 |
| e01d310e657b9f25786aef0b236220d9  | 7 | 0 | 0 | 0 |
| 763483793690947d38f35ce0a3fedabe  | 7 | 0 | 0 | 0 |
| f71a5af5f9384e78e0a8f9efde2e3d47  | 2 | 0 | 0 | 0 |
| ab3157da5c7e9899497bc7360d0e8e32  | 2 | 0 | 5 | 0 |
| d6f70b2d8c971cbc993d113d66644215  | 7 | 0 | 0 | 0 |
| 4c93b5c666527f8145f484ab787e9f64  | 7 | 0 | 0 | 0 |
| 10576f960b90f066be7d93642a241160  | 7 | 0 | 0 | 0 |
| bd6359ada76bc4213040964771badfc7  | 7 | 0 | 0 | 0 |
| d1d564440b9834c0efaa4268ba8a26ff  | 7 | 0 | 0 | 0 |
| 0211a07024a443e03fe25955b42330d4  | 7 | 0 | 0 | 0 |
| 66905fb7a048e7136b6a8e2ac7b66785  | 7 | 0 | 0 | 0 |
| 0619658e469f8cb480c25fa2afdf3c48  | 7 | 0 | 0 | 0 |
| ab05b863dd2b4566ece477dd1c13e67b  | 7 | 0 | 0 | 0 |
| 78f048d919616fc579b869d762a4fc41  | 7 | 0 | 0 | 0 |
| 882be3009f6ac04a7af54df0f589c587  | 7 | 0 | 0 | 0 |
| cdcd3728caecf5605c549757a09df9ef  | 7 | 0 | 0 | 0 |
| f93573665dd23003e297e77690751c01  | 7 | 0 | 0 | 0 |
| 3aa7f30d683bb859a860f4ba4595b7b6  | 3 | 2 | 0 | 0 |
| bbdea6ebae6a7f846b196c595177a0fe  | 7 | 0 | 0 | 0 |
| d70863d40fb59754f7c036893e06a8db  | 7 | 0 | 0 | 0 |
| 0ab554d65328ba17bbf1c325439f5ea0  | 7 | 0 | 0 | 0 |
| 815d9b0da388bbf9cff03678287ab4c3  | 7 | 0 | 0 | 0 |
| 7b2290b9acb4fed939e4c35864959f8e  | 7 | 0 | 0 | 0 |
| a310ba10f8c5df14c7f808cea1b1ed38  | 7 | 0 | 0 | 0 |
| 335d4295edc4fa7dd4705838ec02195d  | 7 | 0 | 0 | 0 |
| 089c3d51325d8e086599689559b50893  | 7 | 0 | 0 | 0 |
| e6b3a5ad8fdf33a31ffbbfef0bc876fe  | 7 | 0 | 0 | 0 |
| 610dc361185bb8c6883d47ba4266f7e5  | 7 | 0 | 0 | 0 |
| 78c553d58f9dd347bb845fe88fbe059b  | 7 | 0 | 0 | 0 |
| e3f29445145cc1ae84e429a2f6a5d381  | 7 | 0 | 0 | 0 |
| bd5020916c31711939c0d0188a732c21  | 7 | 0 | 0 | 0 |
| faa34faa467b9b08871ab7690d9ebcea  | 7 | 0 | 0 | 0 |
| 66bbd888d8f2add54b5e5cdf061aaf1   | 7 | 0 | 0 | 0 |
| 0567eb81445d5caf1656b971957a12e4  | 7 | 0 | 0 | 0 |

|                                  |   |   |   |   |
|----------------------------------|---|---|---|---|
| bee757860b260487e91e0854ad171ae0 | 7 | 0 | 0 | 0 |
| f6aab2ebfab1bc6729859a120f93a0fb | 7 | 0 | 0 | 0 |
| 4979cb57414a2c68ffe8dabfc790dcc8 | 7 | 0 | 0 | 0 |
| e75b68d8538dee19022a5cea1f64754f | 7 | 0 | 0 | 0 |
| 45f015555655f29649bd167f356e27c7 | 7 | 0 | 0 | 0 |
| da14cae232fdb23bca806f75d2d0b9d0 | 7 | 0 | 0 | 0 |
| 7bbe53877f185e495791abba0ba8cb24 | 7 | 0 | 0 | 0 |
| 287803b028b7a40ab07e29357f441572 | 7 | 0 | 0 | 0 |
| 9268b998baef6d59463cb49afd114970 | 7 | 0 | 0 | 0 |
| df8e9502aaf5f761021855d5a5d529b5 | 5 | 0 | 0 | 2 |
| 19386149b7d476c24ad3ca37b9b68710 | 7 | 0 | 0 | 0 |
| 65a3d29f35be11276cffdd3e40cd765d | 7 | 0 | 0 | 0 |
| 045c28758fa8e9d38270f68a381d18c7 | 2 | 5 | 0 | 0 |
| 6341b3358de97a3d5124cb15b0fb2dca | 3 | 0 | 0 | 4 |
| 347226615a24dc607ea7da9ae4581667 | 7 | 0 | 0 | 0 |
| f0ccfdb9ad9e08eca659fffe17c3538  | 7 | 0 | 0 | 0 |
| 841c2febb7074e07bcb9a8583e219e1  | 7 | 0 | 0 | 0 |
| cc8b09ae5e9593b498e05e8cb7c8f5c5 | 7 | 0 | 0 | 0 |
| 390ea6461748f6f24931fc12312961e5 | 5 | 2 | 0 | 0 |
| 78c79d20e358b7f736372990d3da533d | 2 | 0 | 5 | 0 |
| ac36241316ddac3404b45c85400f5fc0 | 7 | 0 | 0 | 0 |
| a9c08b66cbca054a70b7f816e47e34c8 | 7 | 0 | 0 | 0 |
| 18afaed0f581656f334c0fc8c74d11   | 0 | 0 | 0 | 0 |
| 450c8060e7375530cdc2ae16c4f879a2 | 0 | 2 | 0 | 0 |
| 37c42131574686d2a8afce55fa190b04 | 0 | 0 | 0 | 0 |
| b6b7e0a8fb13c2a6397f0e78046c398e | 0 | 0 | 0 | 4 |
| e170c53e8840faba589d25b1e509dd5b | 0 | 0 | 0 | 0 |
| d5fc466e15def52b897b12316cbc0d79 | 0 | 0 | 0 | 0 |
| 9c11c58f14e2a50031a050c85721050d | 0 | 0 | 0 | 0 |
| 03386162f71c9c4875eaa2e883094be7 | 0 | 0 | 0 | 0 |
| c272a6bedc39abf8d8f3ee7a1aaff87d | 0 | 4 | 0 | 0 |
| 472ee252268f5e5051e6ec900c717d48 | 0 | 0 | 0 | 0 |
| 6fa01422358007ab453526e68dee2b6d | 0 | 0 | 0 | 0 |
| 606c79038a97df8566fa2b000d824758 | 0 | 0 | 0 | 0 |
| deed91ccdf6d1f097eb04cd0ec2a772b | 0 | 0 | 0 | 0 |
| 5583c361b314cf6e7c2ed6d0e99eab23 | 0 | 0 | 0 | 0 |
| 0b5a2cec8c50ad01394e7f69a35a5bf4 | 0 | 0 | 0 | 0 |
| a648a3696f4747922b0a76c88aa32372 | 0 | 0 | 0 | 0 |
| 31722ee4230f6645df5d232268ddd5a2 | 0 | 0 | 0 | 0 |
| 61863b14bab80c4a26727118d554c891 | 0 | 0 | 0 | 0 |
| 99fae9405d63b56c85ea2d7f49ddf81f | 0 | 5 | 0 | 0 |
| 66d531564b5d4aa79ac04cce8d5a2df9 | 0 | 0 | 0 | 0 |
| a26ef771735b64b211f49a9b141882af | 0 | 0 | 0 | 0 |
| 15cff05da4b21c576b1846dfad1a5c14 | 0 | 0 | 0 | 5 |

|                                  |   |   |   |   |
|----------------------------------|---|---|---|---|
| c70a8c2c4ad5689bc8633d0b4097ad07 | 0 | 0 | 0 | 0 |
| d080ae0e470e0ca95c4551c7fc4ae139 | 0 | 0 | 0 | 0 |
| 74b85644a45a41625238c08af9bc6254 | 0 | 0 | 0 | 0 |
| 34834382a329a29c42c5800a9f853ea6 | 0 | 0 | 0 | 0 |
| 533f208f9148c3a247e469e68cf972d9 | 0 | 0 | 0 | 0 |
| 34ea1affb4b90999e2241525c5ad9e70 | 0 | 0 | 0 | 0 |
| 01f2576d1b03c8bd3731f51ddcde984e | 0 | 0 | 0 | 0 |
| 6a9865d31f77cdd5135eadd9917d0b46 | 0 | 0 | 0 | 0 |
| 2130a261ea059d2c0eb721574af01f14 | 0 | 0 | 0 | 0 |
| 3fa9770aa0ced58dba0eb018cf64bc15 | 0 | 0 | 0 | 0 |
| 28a626cd9d215ab32e7f74c9c0703a88 | 0 | 2 | 3 | 0 |
| 095efc8c67ee51aab090e563a18120a1 | 0 | 0 | 0 | 0 |
| e7d8fd7666d24266a55e280e5c20ac0f | 0 | 0 | 0 | 0 |
| 81a7bd4067e569ba5b263819cd5534ab | 0 | 0 | 0 | 0 |
| 61eb95edc386df71c00d18b579e68c51 | 0 | 5 | 0 | 0 |
| 248cf2140cb5c8b0c7338bffffb5ced0 | 0 | 0 | 0 | 0 |
| 02ba843967a2a21701e45b796ea686f5 | 0 | 0 | 0 | 0 |
| 12089e862404595da40162295ec0ef68 | 0 | 0 | 0 | 0 |
| 80e85f595639a773710d740c2111de11 | 0 | 0 | 0 | 0 |
| 4ba879fe5446347f67b292c82f90ea28 | 0 | 0 | 0 | 0 |
| 9862103fa7bc12409733c79a18a0bf7b | 0 | 0 | 0 | 0 |
| 05aa3afb4afcf12f03e5749117487c36 | 0 | 0 | 0 | 0 |
| fb57b8e8744e11efe5fe4973f6bc85ff | 0 | 0 | 0 | 0 |
| f785ea42f87d448e3b5bcc9f3a1d6563 | 0 | 0 | 0 | 0 |
| 51bddc53da15ebdb006b90b35b7792af | 0 | 0 | 0 | 0 |
| f504e03f9e0f28d94ef3635b9c7f8709 | 0 | 0 | 0 | 0 |
| 37c21b3a93f04890af0e338e9e028703 | 0 | 3 | 0 | 0 |
| 5cfe638023f02dd276b840e5749b94f6 | 0 | 0 | 0 | 0 |
| bf2fbb2451c9f437e8742e21c6267ef5 | 0 | 0 | 0 | 0 |
| 85ca4d1de8d8f7a5253e6db478289523 | 0 | 0 | 0 | 0 |
| 60834c6e0492bbb839b4787a47508247 | 0 | 0 | 0 | 0 |
| 57db5ede54a1a3d8dcaebd654df4dd96 | 0 | 3 | 0 | 0 |
| 7222ca96811995ab575586eff93a0310 | 0 | 0 | 0 | 0 |
| 970ba90570ee2c35182e40366bd5beda | 0 | 0 | 0 | 0 |
| c1dac2952ffa2ad7dca712e742d04fd1 | 0 | 0 | 0 | 0 |
| 702b35503e337d7decd50c7c9ef82f27 | 0 | 0 | 0 | 0 |
| 048d319ca3411d85699e6054f1ebbb63 | 0 | 0 | 0 | 0 |
| e27fa9705d79b6bb38cdf35609b4a628 | 0 | 0 | 0 | 0 |
| 7c83b2feb72e6b229efae09050d7c9c4 | 0 | 0 | 0 | 0 |
| b42d94de90c97b38c09eb57ccc8df444 | 0 | 0 | 0 | 0 |
| 4ddde68af0f65eb2faeff27d8d47f975 | 0 | 0 | 0 | 0 |
| bbec01e6f94d434c7231343bb9ea17de | 0 | 0 | 0 | 0 |
| ed3eb195efd0c4f79b94a5f5ca208bac | 0 | 0 | 0 | 5 |
| 947d17450a7a050d5ef513d17fe71365 | 0 | 0 | 0 | 0 |

|                                   |   |   |   |   |
|-----------------------------------|---|---|---|---|
| 06b2442ea8675a9985a87570ceec6a5e  | 0 | 0 | 0 | 0 |
| aba3499e02a0342bea432d485e3ad5e6  | 0 | 0 | 0 | 0 |
| 4b1e738129c62ced9f547d4a45ebcc2b  | 0 | 0 | 0 | 0 |
| 0464594fe8730c9905eb11c2e3789f7d  | 0 | 0 | 0 | 0 |
| dbfeaa7944edb72aea8e747e62dc302d  | 0 | 0 | 0 | 0 |
| 59b8054df2e69d0e9bb6f63afd328d18  | 0 | 0 | 0 | 0 |
| 65fe2afe1b04c43af784ba6d6f52c651  | 0 | 3 | 0 | 0 |
| 433cc308487bd8d355d8ccd0126d31b7  | 0 | 0 | 0 | 0 |
| 6d709e1853fc866741809aaa526cbdfc  | 0 | 0 | 4 | 0 |
| 60c4c2b9572be8b6d9f994e925566310  | 0 | 0 | 0 | 0 |
| 897c1de5360c4821e70d2d789e27ba5f  | 0 | 0 | 0 | 0 |
| c356e645a3b1a4df1de73e215d63ac3d  | 0 | 0 | 5 | 0 |
| c441276fbdfc76c743b7cbe8dbda1749  | 0 | 0 | 0 | 0 |
| f9e19f1279cc256d8977956f15fdaab0  | 0 | 0 | 0 | 0 |
| d2e9de04fa55075fcb4dedcdbf380427  | 0 | 0 | 0 | 0 |
| 3a0c8f0261b7a68eddece077b3202139  | 0 | 0 | 0 | 5 |
| 511557c25d046fa93c73b42051fd44dd  | 0 | 0 | 0 | 0 |
| 67196f0fbe1b8e9b4544c3e3839f7003  | 0 | 0 | 0 | 0 |
| 0e03f3cfc378cec0e8902ab80ee753e8  | 0 | 0 | 0 | 0 |
| fd602d36c2f8efa987416a7368f08a5b  | 0 | 0 | 0 | 0 |
| c56ad97e847721d21321da60e4706b96  | 0 | 0 | 0 | 0 |
| 2ca95ada45c3a9bda3c3148df388dabf  | 0 | 0 | 0 | 0 |
| d1cb6a88886a2bc5cd7437e736f9b9c3  | 0 | 7 | 0 | 0 |
| ef94c3c1dcf57d8d55a2d04c3bd2fd0b  | 0 | 7 | 0 | 0 |
| 0ce1db653748465b249216e208693526  | 0 | 7 | 0 | 0 |
| cdcd70e1af8c90d491fc21bec69b6d5   | 0 | 7 | 0 | 0 |
| 1f654d8dff5c1da48f8f612581703f72  | 0 | 7 | 0 | 0 |
| cbba6a5287e0451505f52ce20af0b5a1  | 0 | 7 | 0 | 0 |
| b568717351bb73f20d8c7f563d34a2d4  | 0 | 7 | 0 | 0 |
| c4898dcdedaf047c1ba33074dbb38a0f  | 0 | 7 | 0 | 0 |
| f5b1649315852233e5fabde217de587a  | 0 | 7 | 0 | 0 |
| 61b9949e1592e59533b7dbb4d42bc5ee  | 0 | 7 | 0 | 0 |
| e3e4d5ed6459ed60f6e804e8e3ecbc2b  | 0 | 7 | 0 | 0 |
| e32a2dbc515ea96709c135d4a795c8f7  | 0 | 4 | 0 | 3 |
| 371f24424905bdf4c46c1f79d8e2040a  | 0 | 7 | 0 | 0 |
| 1935f1b938147aa5ebec40d03e3af023  | 0 | 7 | 0 | 0 |
| 8703b0ede83c815c6836d5f049479bfff | 0 | 7 | 0 | 0 |
| d246dd1ae1b9643697aa99daa616e6a5  | 0 | 7 | 0 | 0 |
| cd3bb188bc4ada818647b351831544f2  | 0 | 7 | 0 | 0 |
| 8bf2959ac1fb9d79267e41c59ce10b38  | 0 | 7 | 0 | 0 |
| 0df6f2a5deaaba97c99c59523ac31720  | 0 | 7 | 0 | 0 |
| 440582715c21bba1356b3ef3de65daf2  | 0 | 7 | 0 | 0 |
| 210d1dbbb65ce62e17d43911d30496e8  | 0 | 7 | 0 | 0 |
| b4db37a6e402e64ed3d3c46470c0351f  | 0 | 7 | 0 | 0 |

|                                   |   |   |   |   |
|-----------------------------------|---|---|---|---|
| 1018dd6a2b5bf3d9cbf6629fe9d71673  | 0 | 7 | 0 | 0 |
| 4ffe43efa8177f09f2c19a7b0f7a873a  | 0 | 7 | 0 | 0 |
| 42f5692617b58031204de1f4d915ab21  | 0 | 7 | 0 | 0 |
| 19994d28e70073b74968dfc1bb362325  | 0 | 7 | 0 | 0 |
| 3958850f03179408203a63b58a8647e3  | 0 | 7 | 0 | 0 |
| 839c1e18b5e37f95990d84a0f8c2c5fd  | 0 | 7 | 0 | 0 |
| 23ed36ae32e005497897d179ddd11160  | 0 | 7 | 0 | 0 |
| 8ee07e1a57ef811ab76d04e37028bcb3  | 0 | 7 | 0 | 0 |
| 0657378b24eb751ce8a66bb67638f182  | 0 | 7 | 0 | 0 |
| ba96beaa4b5a25d8a6ebceb11515d6ab  | 0 | 7 | 0 | 0 |
| bba169bb0db4dc4f804f1879e4ba2156  | 0 | 7 | 0 | 0 |
| 45d302c8a5550c6c953f186c46466943  | 0 | 7 | 0 | 0 |
| 4be0fa0913f73594f80e06d0531c9f52  | 0 | 7 | 0 | 0 |
| 419d1c35816769181611db9c738331c5  | 0 | 7 | 0 | 0 |
| 29508beaccc6f4a9c4132ec3cef1e045  | 0 | 7 | 0 | 0 |
| 9b01334a27627455c66b874be23a26bc  | 0 | 7 | 0 | 0 |
| 2d4f0e1b11e9e3b20b0f6d256e31ed09  | 0 | 7 | 0 | 0 |
| c0c23329821a8d81124557af29a63d35  | 0 | 7 | 0 | 0 |
| 915457ee903bdb27fdd33ecda4d1e7ea  | 0 | 7 | 0 | 0 |
| dd25a80d9485b0cbbb2eb72040ede597  | 0 | 7 | 0 | 0 |
| 8ff6b1dff7a983c7a22f6c5664a2890b  | 0 | 7 | 0 | 0 |
| 245ca1536cd23f901fe20b3c9bf5815a  | 0 | 7 | 0 | 0 |
| 1aa1943f9944afaa2ed4b8f547265edc  | 0 | 7 | 0 | 0 |
| 609c66c7c0f693db39b5b971eb4fdfe   | 0 | 7 | 0 | 0 |
| 4e5dd4816d88056816e4bcad43375a75  | 0 | 7 | 0 | 0 |
| ea2ef0fe4c79c9c008d5b12bec62d13c  | 0 | 7 | 0 | 0 |
| c627fb5fda9484b48dadbad55db98d38  | 0 | 3 | 0 | 4 |
| fc54bfaabfc74a3b08a64db0725783be  | 0 | 7 | 0 | 0 |
| 5847b2b3f1e16ec43233cac6a0a33421  | 0 | 7 | 0 | 0 |
| e11a9d3dd441d3b686de37b30f5ce5fe  | 0 | 7 | 0 | 0 |
| 877eaf7568a4862d1abb616d42833a26  | 0 | 7 | 0 | 0 |
| 62574c42d01bd92d5ba726a4214cc1f0  | 0 | 7 | 0 | 0 |
| e28a2dce4409603e2b60539af4b4fed9  | 0 | 7 | 0 | 0 |
| 715357bc55f04a7f5d533d7709bf670e  | 0 | 4 | 3 | 0 |
| 9134722678d66bc433314ccdfc7c24a7  | 0 | 7 | 0 | 0 |
| 8c7f9df2b77ee9e3a34448287622ddd1  | 0 | 7 | 0 | 0 |
| a55961f4c65a1729ab6ad5877dc6a65c  | 0 | 7 | 0 | 0 |
| 0c6fff4cf06b3557462ed84cc3c118353 | 0 | 7 | 0 | 0 |
| 011f26f3b7d0004f4bb7278731b9b41d  | 0 | 7 | 0 | 0 |
| acf3e70bb3ebec5afa3103bc1e7ed6cc  | 0 | 7 | 0 | 0 |
| 09bf930957158040c12454930fc532a9  | 0 | 7 | 0 | 0 |
| e633d75fbcf72f066f835efd635dad31  | 0 | 7 | 0 | 0 |
| 3f2202cd857ac8ef406818e021c08295  | 0 | 7 | 0 | 0 |
| 7a43524d5e2e9ad82b34d21feff5dd04  | 0 | 7 | 0 | 0 |

|                                   |   |   |   |   |
|-----------------------------------|---|---|---|---|
| 426f1a249288b554028a4a68e7a78ac2  | 0 | 7 | 0 | 0 |
| 652dfd1e7bc0e7aacb8f363ce2f79031  | 0 | 7 | 0 | 0 |
| 7d69cea1c847ec821cb27be184447e7d  | 0 | 7 | 0 | 0 |
| d6ef7c90273dc2cc9d6841643fc8f2e6  | 0 | 7 | 0 | 0 |
| 821dfa5444661c72ab662f8de0ad06bf  | 0 | 4 | 3 | 0 |
| 9ce019e51652816b1f0b6ca0c00af9db  | 0 | 7 | 0 | 0 |
| 448fa960992c1867053b27f06c46dd44  | 0 | 7 | 0 | 0 |
| 2874af8039f05c4ac6670f3a2695ae73  | 0 | 7 | 0 | 0 |
| 359abc3bd95f96f6858e64edfdf84dbb  | 0 | 0 | 0 | 7 |
| b8800707487d56c9d6ade6a4958a7bdb  | 0 | 0 | 0 | 7 |
| 017d5892034671a915cf442ceb15b603  | 0 | 0 | 0 | 7 |
| 862c805ed04543189fe804376d6b586d  | 0 | 0 | 0 | 7 |
| 1904ecbc4fd1c56bcf989928613b24c8  | 0 | 0 | 0 | 7 |
| 65b65967d21f61fcb549ebc945ee2923  | 0 | 0 | 0 | 7 |
| 570460472ad9bb4a1df68e917b5bde28  | 0 | 0 | 0 | 7 |
| 833bcbac12cda25e7d62a322ae5111ec  | 0 | 0 | 0 | 7 |
| ec5a99b85bd013f98a59c9062b49490e  | 0 | 0 | 0 | 7 |
| 6038bf2728982dc8ae7d0199bbc99410  | 0 | 0 | 0 | 7 |
| 7ea9ea4fc373b24c2dd03a37769211f1  | 0 | 0 | 0 | 7 |
| 7d8a5dc65af70edd2aaafc5298d3970d6 | 0 | 0 | 0 | 7 |
| 614d3ece5bf0c20dfcbcd4d7a64b74bf  | 0 | 0 | 0 | 7 |
| 374ed6193b96c61eaa207f46a2fe253d  | 0 | 0 | 0 | 7 |
| f582b8570838fd8d5f60742e868f7a04  | 0 | 0 | 0 | 7 |
| 2a80fce9e312f753f00e91951db1420c  | 0 | 0 | 0 | 7 |
| b4ac22345d33680d319955d9b241a9e2  | 0 | 0 | 0 | 7 |
| 6340e240c5eeb95e962b95264105d439  | 0 | 0 | 0 | 7 |
| 63fb76f6660efaeb4b2b7d6906e3fbea  | 0 | 0 | 0 | 7 |
| 58a3fdc9a00c8636e819f549db7a90d2  | 0 | 0 | 0 | 7 |
| b27a257c278aebf4b471dfeb756bb20c  | 0 | 0 | 3 | 4 |
| e701461c4f8ec79440c8f8b8e16c1f88  | 0 | 0 | 0 | 7 |
| b59a0685a27ed74cebd0caa20dc3a20a  | 0 | 0 | 0 | 7 |
| c43d8da5bd874982e8343e8fcb42649c  | 0 | 0 | 0 | 7 |
| 671ea824f0ae42c24b8783c53cbf1135  | 0 | 0 | 0 | 7 |
| 42b2d6c446162e73303640f4cf0d569f  | 0 | 0 | 0 | 7 |
| 70544a8b200e19521d900c83de2ae2b1  | 0 | 0 | 0 | 7 |
| fb306bcb63249a1a64c176d7aa823bdf  | 0 | 0 | 0 | 7 |
| 2f365817d5eff54d96e39bdd80de7c9d  | 0 | 0 | 0 | 7 |
| f4063bb0efecb3081de8684c3b888915  | 0 | 0 | 0 | 7 |
| c1eaf119a840c33226c89f9a55085f0e  | 0 | 0 | 0 | 7 |
| cea0e6e1c2222a1c308c9d00580c04d5  | 0 | 0 | 0 | 7 |
| b6c076d4a8ff7899c3b2ccd01ab985b2  | 0 | 0 | 0 | 7 |
| 8d1d99c4974afce798f472d0ccf50a    | 0 | 0 | 0 | 7 |
| c55feb20d9451b8efa9a45f303c73b46  | 0 | 0 | 0 | 7 |
| f37beaf3a391b4b0d2a1f08b0c92ee82  | 0 | 0 | 5 | 2 |

|                                  |   |   |   |   |
|----------------------------------|---|---|---|---|
| 2a9c6d5b2c4873a24bb0f9b2951d3278 | 0 | 0 | 0 | 7 |
| 052cfa4d8c6323b3f87cbee11a03b8e3 | 0 | 0 | 0 | 7 |
| be511887247f9d852a3fd3ee0f830628 | 0 | 0 | 0 | 7 |
| dc7d6eb071bf461488927b2538a87b98 | 0 | 0 | 0 | 7 |
| 1ea3f15ef0a3c41ef8e01ae693ad2511 | 0 | 0 | 0 | 7 |
| 5b7018ce687ef55a02b76c997c6b5050 | 0 | 0 | 0 | 7 |
| fedd1adc396043f9c5186d69bbb98125 | 0 | 0 | 0 | 7 |
| 3c8191d8f8706ffe666f0afe961170c6 | 0 | 0 | 0 | 7 |
| b405a5f5b7064bdacb577d883530b01f | 0 | 0 | 0 | 7 |
| 26bb2213c0ba0802edf622356ac1b657 | 0 | 0 | 0 | 7 |
| f125613a029b276c18af449c43e8cac7 | 0 | 0 | 0 | 7 |
| 915cc587f262e024a38155af38e3e3d3 | 0 | 0 | 0 | 7 |
| fa6180bf06a85fb62bd2349a0941715a | 0 | 0 | 0 | 7 |
| 4d06ed5d9d367f95c67f776cc1305736 | 0 | 0 | 0 | 7 |
| cef4b19917697d41c19c3892e6311a6a | 0 | 0 | 0 | 7 |
| 6dbd707295974fa16a2edcf6c315d1e9 | 0 | 0 | 0 | 7 |
| 426246a1b1a037d6282eb509faac9b4d | 0 | 0 | 0 | 7 |
| 6cc33526b9a61a453be195af9fc02e2d | 0 | 0 | 0 | 7 |
| 614a12f08c1109e842e1c6effcd9f22e | 0 | 0 | 0 | 7 |
| d9db601707df1851635d9126a986edc9 | 0 | 0 | 0 | 7 |
| 8215b17bda38a74868833fed1362ee53 | 0 | 0 | 0 | 7 |
| fc20aa7af421320da7a8a133edad1861 | 0 | 0 | 0 | 7 |
| f1c33a0d8b75145a833e8d61cbdc06b9 | 0 | 0 | 0 | 7 |
| 9a69253e041234bd3707213b654ee361 | 0 | 0 | 0 | 7 |
| a9f1cf8b502a76b82672e1f2e0e3c7ec | 0 | 0 | 0 | 7 |
| 6c1fba06335262747715c0ea2e0c5e03 | 0 | 0 | 0 | 7 |
| a8918fdfaeda9c45a7904b5a07cd8711 | 0 | 0 | 0 | 7 |
| c5357bc3badb91b91b161ca6efb19263 | 0 | 0 | 0 | 7 |
| e3026ae4e5a7e8f8ebfcaec95d8bd476 | 0 | 0 | 0 | 7 |
| 5a7d7d3379deda14047e683b19bacd19 | 0 | 0 | 0 | 7 |
| c746aaf087c6b0542c1882e6ae841d5a | 0 | 0 | 0 | 7 |
| 0285304207348d1189d9cc0457172708 | 0 | 0 | 0 | 7 |
| b3ce1362424e6b09d4ba2f79723a7a64 | 0 | 0 | 0 | 7 |
| 8627dfd09ecd87cd9fc4b7f3d86b6f7d | 0 | 0 | 0 | 7 |
| d42e172d78d96593574167ed6c92a05e | 0 | 0 | 0 | 7 |
| fbcf39cbb06538e4643a8327b78288a2 | 0 | 0 | 0 | 7 |
| 6ef6267bde6fee10db2194779f1532a0 | 0 | 0 | 2 | 5 |
| aafea52c5d37f3095317431d6e79466c | 0 | 0 | 0 | 7 |
| 73d5b684317eaa48c91f227bd33f04e2 | 0 | 0 | 0 | 7 |
| 452e57572cdab6d7072460e7c9e56293 | 0 | 0 | 0 | 7 |
| 3a49606ef500815272f66df235fc9b5b | 0 | 0 | 0 | 7 |
| ecaea87b1ffab9456ed4508f3c94f661 | 0 | 0 | 0 | 7 |
| 5c9de5346ae828165758aca80382dfac | 0 | 0 | 0 | 7 |
| 3b553dabe13235fb158b442dbe5c1b84 | 0 | 0 | 0 | 7 |

|                                  |   |   |   |   |
|----------------------------------|---|---|---|---|
| b0cb4f515cb52fd0cfca41ed0e99a9ed | 0 | 0 | 0 | 7 |
| f4631d064007f988910b789224c5901d | 0 | 0 | 0 | 7 |
| a87daf120417b767623b84a668902297 | 0 | 0 | 0 | 7 |
| 1ab0c9c087a492a651192f6af046296b | 0 | 0 | 7 | 0 |
| eff24723523eb1be9536bef6cb7499b5 | 0 | 0 | 7 | 0 |
| 2c936ddd589db5f3fa5dcd4c1cc48f39 | 0 | 0 | 7 | 0 |
| 56b214ee3cb4d73fa98bf3e7957ef2c2 | 0 | 0 | 7 | 0 |
| 040665e48243d4430b31cc7c77c3f95c | 0 | 0 | 7 | 0 |
| 16e702635b01a7acda3b0f68eda09928 | 0 | 0 | 7 | 0 |
| ac662614572b2e7d9c89cd7454e320c7 | 0 | 0 | 7 | 0 |
| b89f6af807fd05d6ee3bd5c620e42b92 | 0 | 0 | 7 | 0 |
| 75dbda533134150413e93306ebe0a067 | 0 | 0 | 7 | 0 |
| 8b8e378efe9d5d15ca27c4fd4102b8c8 | 0 | 0 | 7 | 0 |
| d570db024a27281d3be58f85fedf9955 | 0 | 0 | 7 | 0 |
| 4fcc3b74d6fac75dd3c5d380cf097e8d | 0 | 0 | 7 | 0 |
| 6f70cbbd4158fc9e16dea877155b1041 | 0 | 0 | 7 | 0 |
| b5d14199895f9f6f8cd7388a60920ca4 | 0 | 0 | 7 | 0 |
| c24f641132be3d0f494e864fc02386fa | 0 | 0 | 7 | 0 |
| 3f59a71a19e29da4a75deb76e645f530 | 0 | 0 | 7 | 0 |
| 7237d1bd5734e9ca80dc2f73387621d5 | 0 | 0 | 7 | 0 |
| 464edb80894c59aa57f619e850e1fc25 | 0 | 0 | 7 | 0 |
| 1cd8562b8647825dae24e7d0c1271cb1 | 0 | 0 | 7 | 0 |
| 306888e3891e8cc276fb729078d3473d | 0 | 0 | 7 | 0 |
| 437fe581cadda0ecc351a0809a6881a8 | 0 | 0 | 7 | 0 |
| 3a32722dd35c5e2ba7d9c2c3b62d6749 | 0 | 0 | 7 | 0 |
| 711cdf5863251847dbdafb3823291d24 | 0 | 0 | 7 | 0 |
| 10b733cd7ea115101ef726074fb96be1 | 0 | 0 | 7 | 0 |
| cd42228d05d1e065d8d11a8bc7cbe7ca | 0 | 0 | 7 | 0 |
| 9797f5f31429ca8e589dbfb1dafbb536 | 0 | 0 | 7 | 0 |
| 8eb21afa9a12d5d9385f10bcd64f9a45 | 0 | 0 | 7 | 0 |
| edb56e9ea19f5c8e10cb08934779a6e5 | 0 | 0 | 7 | 0 |
| cdcc07cf8dd972b068ea66965fe72576 | 0 | 0 | 7 | 0 |
| 851a48c757cc6fb83dce1a30c83cca63 | 0 | 0 | 7 | 0 |
| 1050affae7cf5984537d87d6a87c0cff | 0 | 0 | 7 | 0 |
| 43e067d03758071ac7760a43e17c4491 | 0 | 0 | 7 | 0 |
| f621f67dc8efcbb9dc842b5ee7a1520f | 0 | 0 | 7 | 0 |
| 1bfd6041c0a3ef28705a895192988ae4 | 0 | 0 | 7 | 0 |
| 0342e0af14f968cfb3e321c4e51cfde8 | 0 | 0 | 7 | 0 |
| 8e2eda2fd18aa23857e4cef9ab9ec81c | 0 | 0 | 7 | 0 |
| 0a32a87dad377424bd7b7084bb9d203e | 0 | 0 | 7 | 0 |
| a7c0ce795c76e348540dc6962cc3a24d | 0 | 0 | 7 | 0 |
| 1487a2a008a987e4d1dd2a64c771a801 | 0 | 0 | 7 | 0 |
| 814243d112becd60535a46dddaab3e04 | 0 | 0 | 7 | 0 |
| 12315b5ff30622746064852facab4ba2 | 0 | 0 | 7 | 0 |



|                                  |   |   |   |   |
|----------------------------------|---|---|---|---|
| 05eaef682fc03622eb990cccb21aa145 | 0 | 0 | 7 | 0 |
| 041d655cce162ac5ccd344234cf6735b | 0 | 0 | 7 | 0 |
| 7e6fee40ed7629ded022c2a1b0e630d1 | 0 | 0 | 7 | 0 |
| e89b4fff7f52ee93ffb836c34592e4e8 | 0 | 0 | 7 | 0 |
| 64d6c814a0db884deb0fe751f442f991 | 0 | 0 | 7 | 0 |
| 365c60ebe5474bfacbf4a54d1296cfa0 | 0 | 0 | 7 | 0 |
| 16044ec1973e04552f5f5a9adf631bb8 | 0 | 0 | 7 | 0 |
| 8b4b0ec874dc5ce577bf8d3fec7d080b | 0 | 0 | 7 | 0 |
| db7d5313a6cd34f0b6eb3414f85a525a | 0 | 0 | 7 | 0 |
| fe32d9732933ed93c7340f641e5c52d5 | 0 | 0 | 7 | 0 |
| c589cfa4a5c49a89498c90bd674c9ea5 | 0 | 0 | 7 | 0 |
| cf1aab30b283864b821770132f69a5dc | 0 | 0 | 7 | 0 |
| 40e100003f3de7a43576699c0180b5be | 0 | 0 | 7 | 0 |
| efc9092c6b07eb22353713f749ddb4fa | 0 | 0 | 7 | 0 |
| e35cfa5bb0059e1e0c975dc03da5e6d3 | 0 | 0 | 7 | 0 |
| 399e6e276f632872298cac45a017a55e | 0 | 0 | 7 | 0 |
| 74dc723fabeee74d69d20229338f957f | 0 | 0 | 7 | 0 |
| 30ecccc198c4df19fc1df1cf9e9c9f11 | 0 | 0 | 7 | 0 |
| 70485ece9196494568d005ded493e631 | 0 | 0 | 7 | 0 |
| c233821341bc04bdc0091d6e855aa056 | 0 | 0 | 7 | 0 |
| 142085d7764d1d84b5ee5cd425c4f031 | 0 | 0 | 7 | 0 |
| 4ff3d6c4ea908bee96511aa9c578f78c | 0 | 0 | 7 | 0 |
| 6d332f5282dc8f124a73920b05b83984 | 0 | 0 | 7 | 0 |
| 5b534e3d68f2f420e89fbf6e19de6062 | 0 | 0 | 7 | 0 |
| 8f237fcf0247195ebb7684429a44c6f7 | 0 | 0 | 7 | 0 |
| 02e02ee2ff4b1affd32da027bc3daab6 | 6 | 0 | 0 | 0 |
| e55cb5130eaf965ad108bd8dcc5f12cb | 6 | 0 | 0 | 0 |
| 4c929563ddeac25e15228e67b95b6609 | 6 | 0 | 0 | 0 |
| 56312628aad4f82156e35e80d973091c | 6 | 0 | 0 | 0 |
| 01b1e9ed85e3dfa140ca6067ea55f603 | 6 | 0 | 0 | 0 |
| 764d1bea1c99f7a2ccb7d004b35ef97d | 3 | 3 | 0 | 0 |
| c4a409a6716dda6c74d3d1b863bb32e0 | 6 | 0 | 0 | 0 |
| d617b80a07a686fcdc0adf71230a561a | 6 | 0 | 0 | 0 |
| 2fbe98eff10a544e208e6624321d31fe | 2 | 0 | 0 | 0 |
| 952743aa0ab794a899f53e164dc49038 | 6 | 0 | 0 | 0 |
| a41f3ee0b641cacfe76f2214283f459b | 6 | 0 | 0 | 0 |
| 3272cd498e6ed6ef6f2c281b57c556da | 6 | 0 | 0 | 0 |
| c826764e628c67de60d68c8b0c13522a | 6 | 0 | 0 | 0 |
| f9c1e93a31d792e32940142fb007c169 | 6 | 0 | 0 | 0 |
| f20b6b95b07cf0859c61ec81e488b8e2 | 6 | 0 | 0 | 0 |
| 5b5ad29c19134c5e31d765001b1969cc | 2 | 4 | 0 | 0 |
| 0eb8e1bb10ed00e1a06fbdfc964a0e77 | 6 | 0 | 0 | 0 |
| a6060c0b203340cfa0543f2691052149 | 6 | 0 | 0 | 0 |
| 631551ba01e147d82e780d483a339c98 | 6 | 0 | 0 | 0 |

|                                  |   |   |   |   |
|----------------------------------|---|---|---|---|
| 02e464686fee925c80cfc0ccb48510fa | 6 | 0 | 0 | 0 |
| 860887e71db49d3b9611f07534ea7ea0 | 6 | 0 | 0 | 0 |
| 93eee1e154bcb187a89006a181fb433d | 6 | 0 | 0 | 0 |
| c33c627b02ecda9dc4f675ee369c0429 | 6 | 0 | 0 | 0 |
| 0aafca0d10ec352a2eb29541a12ca921 | 6 | 0 | 0 | 0 |
| 6267a97284ea045937a42d8ca92aa1b6 | 6 | 0 | 0 | 0 |
| e55fce658cb03a03aa4e85f2a703d084 | 6 | 0 | 0 | 0 |
| 7795fc130635d26b7adc48ba3eb53c8c | 3 | 0 | 0 | 0 |
| d51ead18beaac87083a7d7a800d93d3e | 6 | 0 | 0 | 0 |
| 284733bc98dbf9550f2c68d781583368 | 6 | 0 | 0 | 0 |
| 364cf342b378b2ef65464f7f04aed54c | 6 | 0 | 0 | 0 |
| 8421264499251b3d4888d390f1babf86 | 6 | 0 | 0 | 0 |
| c6e4ecb0921b78956e010bac2232594c | 2 | 0 | 4 | 0 |
| 19ed2d97a48a670fb1ab48d8c1fc59df | 6 | 0 | 0 | 0 |
| 5c14af07d691a3b0c958751a7a6c420c | 6 | 0 | 0 | 0 |
| 2cfbc657b646d6d848368c81653790a0 | 6 | 0 | 0 | 0 |
| 1ea7ff8876e24f0cd74f1d1bd30f0f0b | 6 | 0 | 0 | 0 |
| 2520b7797bbc15a6a083f2ad2380841c | 6 | 0 | 0 | 0 |
| 964c68971cc031070ee5036ecb85a6b4 | 6 | 0 | 0 | 0 |
| d06e23fe3854ddf0133c4fdac9dc90fd | 6 | 0 | 0 | 0 |
| 08da949def99221370e11c25f3000a86 | 6 | 0 | 0 | 0 |
| 1ac0de2f391e04cb939fa583e0b0908b | 6 | 0 | 0 | 0 |
| 1f517f0c808d11e8f7b31c24389e0649 | 6 | 0 | 0 | 0 |
| 1cc0c67a17d00dbb0ee5154c8752936a | 6 | 0 | 0 | 0 |
| e8d121da9fd0a59fc964104a362f5f52 | 6 | 0 | 0 | 0 |
| 1ee1cc6580ec0fdf792697d840f623f5 | 6 | 0 | 0 | 0 |
| 60d4f3b0804632161f4529c21d782513 | 6 | 0 | 0 | 0 |
| c983cec9f8d6859751531fe597dbc644 | 6 | 0 | 0 | 0 |
| 30cb9850770420c257ce5e5c6560b464 | 6 | 0 | 0 | 0 |
| 40784b9dd231bd6a6853c3892ebf78af | 6 | 0 | 0 | 0 |
| 25b05acab13b6941f73e0cc45cee23bc | 6 | 0 | 0 | 0 |
| 137be3e1a24590ff547e53b7ec63bcf2 | 6 | 0 | 0 | 0 |
| 69db90d48d4eb0f40705eb11ce787ac4 | 6 | 0 | 0 | 0 |
| fac9714cb60b55354e2af2dfc55582f  | 6 | 0 | 0 | 0 |
| 7c97c1483b1d6b5b6013ccbbe97f6dcd | 6 | 0 | 0 | 0 |
| b02c26ce25762bb2ee0e56ee0debed27 | 6 | 0 | 0 | 0 |
| d0aa3e69dda9a738df19d6c64c46bb93 | 6 | 0 | 0 | 0 |
| 0f1a2796a2d7d4d717ea6b78e50df25e | 6 | 0 | 0 | 0 |
| 80393118d33a7110126c4748be01ef6b | 6 | 0 | 0 | 0 |
| d7a33f416ebf41826040d87d95f6dc1d | 6 | 0 | 0 | 0 |
| 30e9bbdd520e03335ccd2dedf0387f75 | 6 | 0 | 0 | 0 |
| 836c554739b319f8ec117934fe85dd0a | 6 | 0 | 0 | 0 |
| 911d16236e4d65431e377b025e0d1005 | 6 | 0 | 0 | 0 |
| 2ac5637a3704f62a8512829078806a65 | 6 | 0 | 0 | 0 |

|                                  |   |   |   |   |
|----------------------------------|---|---|---|---|
| 4cf4d70bfac63bc8ae7c1248ff94c2d1 | 6 | 0 | 0 | 0 |
| 13c20ef8c49f993838390295c2a2b587 | 3 | 3 | 0 | 0 |
| 935f731b61f416b7373ad25651ad93c3 | 6 | 0 | 0 | 0 |
| c7110130f863e64f96cfe436bdf2bcfd | 6 | 0 | 0 | 0 |
| 401be3160506055630efd51f3184ef53 | 6 | 0 | 0 | 0 |
| cbf56df5f18e8e01bb23dd3a45db6271 | 6 | 0 | 0 | 0 |
| e69bbdc7e0e78a4095e1d4906a6fe5c1 | 6 | 0 | 0 | 0 |
| cfa41270a9a992068d5c7d8327dc968d | 6 | 0 | 0 | 0 |
| 409adace77f3b2209a660efeed676bd6 | 6 | 0 | 0 | 0 |
| ed603d0bf801f22de8cdaf3cfcabfd70 | 6 | 0 | 0 | 0 |
| 62a0106b4c7d958bc4c02197e0a1f2a5 | 2 | 4 | 0 | 0 |
| da37afa6cddcbda3f1cb934800f495b8 | 6 | 0 | 0 | 0 |
| e979ccb2b321eb146d6f6abbfe586a33 | 6 | 0 | 0 | 0 |
| dfcc0c89e993a306d35927214558cdec | 6 | 0 | 0 | 0 |
| d17ff8c8482775df75058828d6b1a1c4 | 6 | 0 | 0 | 0 |
| de19e67f5cc8c5d1401afbe0f8db9e4e | 6 | 0 | 0 | 0 |
| 1e59450c5bf2f295e2332d9ba02a9085 | 2 | 2 | 2 | 0 |
| e81779cb992c042270facb16e817a84c | 6 | 0 | 0 | 0 |
| 457fc74e5092bc4e3cefb6ca7b054b4  | 6 | 0 | 0 | 0 |
| 007b1f72adc6e7f5e1a4249fa0f4ae8e | 2 | 4 | 0 | 0 |
| b3199151374315603ab46e56859d431f | 6 | 0 | 0 | 0 |
| 8349e92f0155da8f278ccb75f2f759da | 6 | 0 | 0 | 0 |
| b0aab089ec41df8bbb4335d79aa03d43 | 6 | 0 | 0 | 0 |
| 8ff326b223654493ab42019bdbb020dd | 6 | 0 | 0 | 0 |
| 39b7abd39d4132905981f922a1e272ae | 6 | 0 | 0 | 0 |
| bc260c592935362834d981d4efb2b4d4 | 6 | 0 | 0 | 0 |
| d4f115f9181e989ecc63fd5a5fb9ffdd | 6 | 0 | 0 | 0 |
| e071f2868eb0c52741890030cd540c40 | 6 | 0 | 0 | 0 |
| 5897d9e0e658c686f4f6317fbbbdfea9 | 6 | 0 | 0 | 0 |
| 18885ac110c830e3bd27541c0d5741c9 | 6 | 0 | 0 | 0 |
| c074729e2d57fc5d0ec46114e3ba2eb5 | 6 | 0 | 0 | 0 |
| 5973335130480845d05e02e421b65357 | 6 | 0 | 0 | 0 |
| 740c46b79ede623f692c6956471f950d | 6 | 0 | 0 | 0 |
| 5930cbd8f34130b1e26c64257994c366 | 6 | 0 | 0 | 0 |
| 3c0522a0f938354c757ef6045a86f15b | 6 | 0 | 0 | 0 |
| dd32f7000fc082830bf90d2ed29581c5 | 6 | 0 | 0 | 0 |
| 3adceb50be747d6b99068d025175607d | 6 | 0 | 0 | 0 |
| 9ab4143ac79563c8cb5f845141b3d7e1 | 6 | 0 | 0 | 0 |
| 2bd79a995d64da080b0b6ae49bea7bd6 | 6 | 0 | 0 | 0 |
| 233af4477ea34d3be7cacf8b27bc44e8 | 4 | 0 | 2 | 0 |
| d470bf477dcfc3b73c9be494fefe016c | 6 | 0 | 0 | 0 |
| ba2478032c69278456d3a29eb59a379f | 6 | 0 | 0 | 0 |
| 37363cca6d2e1c4133ec94544ca7f5f5 | 6 | 0 | 0 | 0 |
| b53618879a38b52dd83a2cc02d1565c9 | 6 | 0 | 0 | 0 |

|                                  |   |   |   |   |
|----------------------------------|---|---|---|---|
| 7ddbc296eaf4f8cbe623a1bc5c12fd87 | 6 | 0 | 0 | 0 |
| 57eba064f932cfab25dce97175da4a59 | 6 | 0 | 0 | 0 |
| 88810f3e7ed208ba7db88b692af6c04b | 2 | 0 | 0 | 0 |
| 89d6fa5dd6f960017577fa9e7e89baa6 | 6 | 0 | 0 | 0 |
| 4ec5245f0cf914eab413b795d1a9d7b2 | 4 | 0 | 0 | 0 |
| 2e24dd43b1fb11c74ebcfef302655df6 | 6 | 0 | 0 | 0 |
| 90fb51e1a56241ae033e5c1806939f24 | 4 | 0 | 0 | 2 |
| 18c1a85128555485a7d236f2c8499461 | 2 | 0 | 0 | 0 |
| d26678ebc09e9430e877ecaa18991b1a | 6 | 0 | 0 | 0 |
| 64055f73078787f773b23e1331bcd657 | 6 | 0 | 0 | 0 |
| 7c2eb296cd7204f36d8c3860d0c11a7b | 6 | 0 | 0 | 0 |
| e3698bacdc99c0a82354b15857203b8e | 6 | 0 | 0 | 0 |
| d4ee4a3723a5d45f325e200cad25029  | 6 | 0 | 0 | 0 |
| a6b00e578e976d4f91f45b31e05a563c | 6 | 0 | 0 | 0 |
| 67a9986a312711e0ae28cc2a104b3e3e | 0 | 0 | 0 | 0 |
| 9c55ed0b9d54a04d85374c8e5f1d89dc | 0 | 0 | 0 | 0 |
| f34e55fb486d3f61a9fe3df5e64054   | 0 | 0 | 0 | 0 |
| f656ad4345de56b54657e6ac37f1d225 | 0 | 0 | 0 | 0 |
| 6f1cdaed96f6283847c2960cca76d02c | 0 | 0 | 0 | 0 |
| c350b351d25ab5812eced62833f7b70a | 0 | 0 | 0 | 0 |
| b753cf407e18080878fd607a01cbe094 | 0 | 0 | 0 | 0 |
| fc50b21f160ab989459cdd2988034e36 | 0 | 0 | 0 | 0 |
| ac30eb9b8fea74a7cf10379ce915844b | 0 | 0 | 0 | 0 |
| 840fd2a8d474cb4c9630ebaecf0372f3 | 0 | 0 | 0 | 0 |
| c3485c4ff6007fc77c2d27859220f928 | 0 | 0 | 0 | 0 |
| a8e632772a473f89525dd4eb0ede681f | 0 | 0 | 0 | 0 |
| 7ef10d9757ccc7b5c70d2080ae5f0e8f | 0 | 3 | 0 | 0 |
| a3085c59dc00fb19bbe5b7f2d317c836 | 0 | 0 | 0 | 0 |
| d07d6b4b92ece94f72066a726123bab4 | 0 | 0 | 0 | 0 |
| 30545716b9685e7f6b3eb0ebaae63523 | 0 | 0 | 0 | 0 |
| ca1607e0af75df13b9319e0ce874e02d | 0 | 0 | 0 | 0 |
| f57f9b7fa91752114ed5288f177b5c5f | 0 | 0 | 0 | 0 |
| 4d51a87624857bc6944efcb4bf80495e | 0 | 0 | 0 | 0 |
| 264d5f6280fac9ece55bcbb128d56395 | 0 | 0 | 0 | 0 |
| edac898971c219f9e63fb93c3121faf0 | 0 | 0 | 0 | 0 |
| 9a7698df3cc7769444b6f3fa7007ea90 | 0 | 0 | 0 | 0 |
| f50c52c57268f294555da11df6ea50d3 | 0 | 0 | 3 | 0 |
| 454e94c9ed7d4f4d2e58f38df54a92a2 | 0 | 0 | 0 | 0 |
| dd48f68c14572c66673c1cdb3c57a785 | 0 | 0 | 0 | 0 |
| 6c89a67d8730d34e06ef6893d55e5c12 | 0 | 0 | 0 | 0 |
| 58bbc15a683c7603f5b4fa5fea71a845 | 0 | 0 | 0 | 0 |
| ec4527158a2f3d6b0a0a6c57cf8d6cb4 | 0 | 0 | 0 | 0 |
| 44a6ca47dc018b17d32e5a9bcb3439d1 | 0 | 0 | 0 | 0 |
| bb0c1dbd4cd19827ed563d25020b421e | 0 | 0 | 0 | 0 |

|                                  |   |   |   |   |
|----------------------------------|---|---|---|---|
| 08dde8fe2f6f9a101820b1d9bfd4e2a7 | 0 | 0 | 0 | 0 |
| c3203741b44336e690f271c1ec2333bd | 0 | 0 | 0 | 0 |
| f7a7220d8c41243aa16a67f8b8ce259a | 0 | 0 | 0 | 0 |
| a206ef72827e0358007b5a21869f8753 | 0 | 0 | 0 | 0 |
| 13453530e97fff0aa7295e955ab2622c | 0 | 0 | 0 | 0 |
| 921489b8dbe6a054a9ef65d07dbd6218 | 0 | 0 | 0 | 0 |
| f0e271de98ff9859ac792ebf5f4c4b6e | 0 | 0 | 0 | 0 |
| 2f896284b5d5a3311daab5790c39acd6 | 0 | 0 | 0 | 0 |
| 8e04d48368e40ddd243f120e977e2155 | 0 | 0 | 0 | 0 |
| d55c79830e9d4e1d3676418a1d01884a | 0 | 0 | 0 | 0 |
| 60238a0b0ae3f2caedc4d81e49fc68c0 | 0 | 0 | 0 | 0 |
| d289a3a6b224a0e7e485461639b549a8 | 0 | 0 | 0 | 0 |
| d7c00916f48816a53b68ca794fb7744e | 0 | 0 | 0 | 0 |
| e38904bf8e7dadd586604ef6f327e4d4 | 0 | 0 | 0 | 0 |
| e0bb1cdea85312549ce5bfd599ece425 | 0 | 0 | 0 | 0 |
| c326f45d047757b23f864e60b65a72fb | 0 | 0 | 0 | 0 |
| 8a5dfe48789df38d5dd989c3e155ca5e | 0 | 0 | 0 | 0 |
| ab87a2006e8799a189d7dcd4b3b74111 | 0 | 0 | 0 | 0 |
| 30764f566065adc47948e8511153c64d | 0 | 0 | 0 | 0 |
| afde86b1c8122dfd64729ab5d9120137 | 0 | 0 | 0 | 0 |
| 81818b92393fb39ddda2947a8562c0da | 0 | 0 | 0 | 0 |
| c64c4625224dff87c5727fe48e39ed78 | 0 | 0 | 0 | 0 |
| 0f2905c5c3b681a088a4b6214226702b | 0 | 0 | 0 | 0 |
| dd11ce4b9d157e7f50f7d0558f8cc1e5 | 0 | 0 | 3 | 0 |
| 0bf1462ee1a7b9b992a94970bc774592 | 0 | 0 | 0 | 0 |
| 45f4a3e57f9c008caf202afa72f8fa1b | 0 | 2 | 0 | 0 |
| c59c26dfc67daf8341ad161ec101878c | 0 | 3 | 0 | 0 |
| c9180cd98dfc3ee5c0296440abd6688a | 0 | 0 | 0 | 0 |
| 4f90cd543bc025a7fcbcf8ae6fc4ab8a | 0 | 0 | 0 | 0 |
| 78a9344515af72c2609dd6f68c747d89 | 0 | 0 | 0 | 0 |
| 15615a42406d52adbfe791f25c513694 | 0 | 0 | 0 | 0 |
| 7112d9412bd8999d2509d90e3bb89a30 | 0 | 0 | 0 | 0 |
| a90f3d418832a739dd9add081c1b8ffe | 0 | 0 | 0 | 2 |
| f26315b2c79afd02ea360e95ec57caf2 | 0 | 0 | 0 | 0 |
| 23cac2c5f82221cc3b51ee7847189886 | 0 | 0 | 0 | 0 |
| 2b406a068a434f4ba52dd381ab4a32d2 | 0 | 0 | 0 | 0 |
| cf01bdfd5e26a3e45017359639b572c2 | 0 | 0 | 0 | 0 |
| f0dde02c99ae98a9336067921e710874 | 0 | 0 | 0 | 0 |
| 97d0f67bd769a8642db7d165aeb7a508 | 0 | 0 | 0 | 0 |
| bf4469e203528112c62ed1d89ba407e8 | 0 | 0 | 0 | 0 |
| af53fef083e42f33ff2e763314e89121 | 0 | 0 | 0 | 0 |
| 0321e20dbd54bbd7508bb9f444fa36eb | 0 | 0 | 0 | 0 |
| 7e2fa7d3155fbcefc370f4001c673739 | 0 | 0 | 0 | 0 |
| c46dd0fa28e0894fad1e614a12ea9824 | 0 | 0 | 0 | 0 |

|                                   |   |   |   |   |
|-----------------------------------|---|---|---|---|
| ec4d0ac40df7eb3e1f0860db57962f93  | 0 | 0 | 0 | 0 |
| fccb751917b1a5cbc23f8b73f309c037  | 0 | 0 | 0 | 0 |
| 030f9f2bc44c36a82e66c0de661ecd5f  | 0 | 0 | 0 | 4 |
| b488f39d506c58d49b4419724c3e0d5b  | 0 | 0 | 0 | 0 |
| 353e988abb5ee6e3a1cbef95da6b657c  | 0 | 6 | 0 | 0 |
| 97b8ac2f2bbc9efafbdda4760a47a5d3  | 0 | 6 | 0 | 0 |
| cd758969c9263a5729b11b99b2cd1eb7  | 0 | 6 | 0 | 0 |
| 0b0a4bddd823efeb9984bf862fe81f8   | 0 | 6 | 0 | 0 |
| 1634c89af87d04e1c7d435036f4a1e17  | 0 | 6 | 0 | 0 |
| 8f56fd67af63cde661a137bf56427630  | 0 | 6 | 0 | 0 |
| 0ee14cd7cf5172617f35b49ec387de5b  | 0 | 6 | 0 | 0 |
| cbae64933ee47ca45feb407ca0ce7d9d  | 0 | 6 | 0 | 0 |
| a8fd53861058854ab03c6d34eae565e6  | 0 | 6 | 0 | 0 |
| 426e61df666fbd52d093c1181a56a244  | 0 | 6 | 0 | 0 |
| 329abf26198863ec9e19986b4b3a9e53  | 0 | 6 | 0 | 0 |
| fda07906f74ad258abe6a70527fa4a0b  | 0 | 6 | 0 | 0 |
| c64ec42ddb66beb6cdd7a39006ce803d  | 0 | 2 | 4 | 0 |
| aa547989f7aeeedb35f5b4adf00c599a  | 0 | 6 | 0 | 0 |
| 80af328097d6933c53b52426115723ef  | 0 | 6 | 0 | 0 |
| 5ab5bc01de7804b18ee12ad3592008d6  | 0 | 6 | 0 | 0 |
| 0250adc889ba422f09a214555afa425   | 0 | 6 | 0 | 0 |
| c080375ba196615a933512ea93a48763  | 0 | 6 | 0 | 0 |
| 316cdc9e18d702a97be1b6f914079c88  | 0 | 6 | 0 | 0 |
| c885e2040a8b7ec6a12e9a940ea5b33d  | 0 | 6 | 0 | 0 |
| bd6a0f119d7700d8fa1e7d0161198883  | 0 | 6 | 0 | 0 |
| ba65dc1295bffae8ecb704ee5aca83d1  | 0 | 6 | 0 | 0 |
| c1872e571cca1f147c7b58dab148f17d  | 0 | 6 | 0 | 0 |
| 6b046028b447c74b6ceb5f59525903dfe | 0 | 6 | 0 | 0 |
| 14b3e2d2410d712c33db907eb57e25cc  | 0 | 6 | 0 | 0 |
| 03c635f5355c8ddf89bd2e1f04e06427  | 0 | 6 | 0 | 0 |
| 2d4b1c7dd6fe160939b0d89a6a69319a  | 0 | 6 | 0 | 0 |
| f6833117158d345c15a1f35f349bc9f3  | 0 | 6 | 0 | 0 |
| 3cb3e030da230b6720e501e2adc7d145  | 0 | 6 | 0 | 0 |
| 402770776526605d5f56fbb1c6e22f68  | 0 | 6 | 0 | 0 |
| bce28f984e895dfb1e9ccac163e17f03  | 0 | 6 | 0 | 0 |
| e61e5b8858d357873544af73512b0897  | 0 | 6 | 0 | 0 |
| 06214aba73557a7b747b8fb83b81e3a3  | 0 | 6 | 0 | 0 |
| 8f0101031ab9df38d74582bbca1200fe  | 0 | 6 | 0 | 0 |
| 03c200a9a25cfc50b436d0e8626d27ea  | 0 | 6 | 0 | 0 |
| eeef6556515c1777f5b968d6e32e08b   | 0 | 6 | 0 | 0 |
| b9650ccab6abbba402e8d149dfad86d7  | 0 | 6 | 0 | 0 |
| b14e13428b570bd42b94271dd8210f3d  | 0 | 4 | 0 | 2 |
| 5d0efaf7ae0f1c359ff18c20afef9acc  | 0 | 6 | 0 | 0 |
| 854eddc87a6c150bfbb5fb630d6845a8  | 0 | 6 | 0 | 0 |

|                                   |   |   |   |   |
|-----------------------------------|---|---|---|---|
| 0c251322ca8099ac25cdc8171b52cd7a  | 0 | 6 | 0 | 0 |
| c22e3cb355653c5fb5a2e94afc3d2e37  | 0 | 6 | 0 | 0 |
| 26383c099c9996a85ddeebb24e57f1ab  | 0 | 6 | 0 | 0 |
| 623a3c83708ff2311c93c312d319ddac  | 0 | 6 | 0 | 0 |
| c4a3bd906be82b950e5c7dc97dce3edb  | 0 | 6 | 0 | 0 |
| 5966e376998259c6ac4a83d4c955864a  | 0 | 6 | 0 | 0 |
| 235d212244f4f078d6c7ca9ab5d558a6  | 0 | 6 | 0 | 0 |
| b06d7cc9fbe163d5143cea4945e35833  | 0 | 6 | 0 | 0 |
| b6ccd10b18ebb609cc706266d75ec222  | 0 | 6 | 0 | 0 |
| 713c3ed1ed0fe746b76b08efde759a20  | 0 | 6 | 0 | 0 |
| 14a2a17c620887b0db8f55134a2bed99  | 0 | 6 | 0 | 0 |
| 927c35a3e250fad13fbbb1ef5f49b125  | 0 | 6 | 0 | 0 |
| a0314c77071c4e5b6bcee0db4a72dc82  | 0 | 6 | 0 | 0 |
| 94e70359906ad3d2f9117e5546b77517  | 0 | 6 | 0 | 0 |
| dcfb27700e566af90f0ef4d868811368  | 0 | 6 | 0 | 0 |
| dd57d9bc0a376e4a34a60dcaecfb96db  | 0 | 6 | 0 | 0 |
| 4ba47da54f4d631be28f91b48eead1d4  | 0 | 6 | 0 | 0 |
| e941adcb99740e930198ab2a61d7b0f5  | 0 | 6 | 0 | 0 |
| 21276158caf21855c133fca8431c852d  | 0 | 6 | 0 | 0 |
| 47f20c26fdd3996c710c6b835482cc55  | 0 | 6 | 0 | 0 |
| 8b33183717fa39f41b9c57e9a9824d36  | 0 | 6 | 0 | 0 |
| 204f1930a5154818d89c8c21b9ec4e5e  | 0 | 6 | 0 | 0 |
| 179a210c0dfbe77eacb3becfc69bbdf2  | 0 | 4 | 2 | 0 |
| f48fbbc3f8add0a5574b53b55880d5a1  | 0 | 6 | 0 | 0 |
| 15dda5bd3ef69e53f9b15b282fcba395  | 0 | 6 | 0 | 0 |
| 77e20a1d76da484b04e8e582683cb066  | 0 | 6 | 0 | 0 |
| 4a6cceace07248f20b3949c82221ef65  | 0 | 6 | 0 | 0 |
| 25a8617823f3033180075559ec574633  | 0 | 6 | 0 | 0 |
| 691f44047f8732d65c540ef5e3a256ad  | 0 | 6 | 0 | 0 |
| 299761713c123c38dc6d6748570a8ecd  | 0 | 6 | 0 | 0 |
| 9990cdb5aae19f235a316500621f037   | 0 | 6 | 0 | 0 |
| e89d4cc9142a5da29b1593f6399532cc  | 0 | 4 | 0 | 2 |
| 2b224bea07fc51283c6ea8c4f3d7016c  | 0 | 6 | 0 | 0 |
| 45702a15f7acbb73fdbb0bb83acc5e9b  | 0 | 6 | 0 | 0 |
| 5809c15976c599adbbea647077c66355  | 0 | 6 | 0 | 0 |
| e9aedab8b351fa35ac3ec14a3a21f070  | 0 | 6 | 0 | 0 |
| ea3ee66b3f1184c829f001aeeece0008  | 0 | 6 | 0 | 0 |
| 6ae00d0de977a28dc5390ce37a06a1f3  | 0 | 6 | 0 | 0 |
| d04662994014e5f2881fafac4a564826  | 0 | 6 | 0 | 0 |
| e1761afb1a18966de38b781aecb438fe  | 0 | 6 | 0 | 0 |
| a293a6c93a6f0c744a6d8a34da648ff7  | 0 | 6 | 0 | 0 |
| a12b5b6510d04435e489acf15dfd9419  | 0 | 6 | 0 | 0 |
| 35a38ad8795c327b790bacf5cdfef2f40 | 0 | 6 | 0 | 0 |
| e0638046a114c9cd9311566c7bb7b41a  | 0 | 6 | 0 | 0 |

|                                   |   |   |   |   |
|-----------------------------------|---|---|---|---|
| 6d54b936cb86ae6149c15881552783df  | 0 | 6 | 0 | 0 |
| db3d332037640e7db07a8fa67c457658  | 0 | 6 | 0 | 0 |
| e237ab69b50e1e5f51d413064e096181  | 0 | 6 | 0 | 0 |
| a8aec689e7e49024f62ef16e79498b2e  | 0 | 6 | 0 | 0 |
| 249f7e4b767bf2f901b854628edfa99b  | 0 | 6 | 0 | 0 |
| 50cc2b00ef75beaad72a270d53377dc9  | 0 | 6 | 0 | 0 |
| e00158ab2ce62c036f15412ef4798cc9  | 0 | 6 | 0 | 0 |
| db821c2b13eeb5a27f8fca3afe9a16a1  | 0 | 6 | 0 | 0 |
| 6265c56d68fe0e2200ce0715a9187b78  | 0 | 6 | 0 | 0 |
| 24645e4740a479e9d9613f4e84716ae8  | 0 | 6 | 0 | 0 |
| 51d64094bfc1fa6652da4241d4d059da  | 0 | 6 | 0 | 0 |
| f0bbf676d753d25fae7a7f9f81f8f884  | 0 | 6 | 0 | 0 |
| 71c43b23493daaedef85dab4200c1814  | 0 | 6 | 0 | 0 |
| 5d1f136cfd1a7e8ea5d1181b80f3e443  | 0 | 6 | 0 | 0 |
| 947707ab7d0318f4e88583d3796e1f5d  | 0 | 6 | 0 | 0 |
| fd2492026994430be01a17b54288af74  | 0 | 6 | 0 | 0 |
| 1f74c3053e42ab066b798cb0eae47ca   | 0 | 6 | 0 | 0 |
| 9e94046545483b1f0ec1238acbdddab5e | 0 | 6 | 0 | 0 |
| 0ab936b33d55089db8520371e9bd3800  | 0 | 0 | 0 | 6 |
| af1f3854c070f885d387a55de12bd677  | 0 | 0 | 0 | 6 |
| fc783fb0f41a453a10f69200c09df41a  | 0 | 0 | 0 | 6 |
| 916d8b00ff7340877936c7949e1083b9  | 0 | 0 | 0 | 6 |
| c67ab1e44b1a39594f791b88c1b5e2a2  | 0 | 0 | 0 | 6 |
| 245916e30b6e103978df7efcb33ba43f  | 0 | 0 | 0 | 6 |
| 42c78eafadfb70d67a9f45bbc956602e  | 0 | 0 | 0 | 6 |
| f513197f7806f5ead2995b9d837df08b  | 0 | 0 | 0 | 6 |
| 8c14a065ad57dc2d5d634db2cc2eff61  | 0 | 0 | 0 | 6 |
| f02159d461682834815dd92f255f09fd  | 0 | 0 | 0 | 6 |
| 1333b399ddcc4e56741cb2a94ed7a8c1  | 0 | 0 | 0 | 6 |
| e0dca3d99bd152cfe6f9c7f574883f70  | 0 | 0 | 0 | 6 |
| 521a4159b498a076c8a734b7b22ad4ca  | 0 | 0 | 0 | 6 |
| 3af4c9531e99027c0a459a56c32ea2cd  | 0 | 0 | 0 | 6 |
| 92f1fac91ade689a287cc8b7bf9e1f9e  | 0 | 0 | 0 | 6 |
| b7795d4fe7c39ae2339b7a116d267a55  | 0 | 0 | 0 | 6 |
| 9c199de96a0e3fee5a1ae5c7496463e2  | 0 | 0 | 0 | 6 |
| 6c5cdeb6d6d67b1ba6d7a1c00852f627  | 0 | 0 | 0 | 6 |
| e711855df33bcfa04a4aaa2c09be1256  | 0 | 0 | 0 | 6 |
| e91c28989cc020f0f481e1d23593853d  | 0 | 0 | 0 | 6 |
| bffd3191ec2e39d04187158ca24bab17  | 0 | 0 | 4 | 2 |
| 184883747f883e40eeba2bbfed1fedbe  | 0 | 0 | 0 | 6 |
| c5c22609ea5272c5d24f888f2af4645b  | 0 | 0 | 0 | 6 |
| 9c7e65eee9f27b9bf7430ccf6a7526fc  | 0 | 0 | 0 | 6 |
| 39b3ab9714d8f22266eee241e800f42f  | 0 | 0 | 0 | 6 |
| 2cc2cc0512ee676c1c0be05bfb2aeea   | 0 | 0 | 0 | 6 |



|                                   |   |   |   |   |
|-----------------------------------|---|---|---|---|
| 2dbbb799afa36e890f261b15584e7553  | 0 | 0 | 0 | 6 |
| 63df9e9e45a4224a065f390ee57425dd  | 0 | 0 | 0 | 6 |
| f8e8ce2fa518ad069506f730e85f019b  | 0 | 0 | 0 | 6 |
| 9e74af68fd9bc255a000cad3c0404c6e  | 0 | 0 | 0 | 6 |
| 4f78049e703d2ed18a77f2b2a8d10511  | 0 | 0 | 0 | 6 |
| e1f7190b9c775c8ec5c03f4fba72ac1a  | 0 | 0 | 0 | 6 |
| 80ba145f88a7e34231e0080488bed202  | 0 | 0 | 0 | 6 |
| 757d8fd7ebe73cb4778f9c6b382ecce7  | 0 | 0 | 0 | 6 |
| 64a581b974afbace51d7a5f691568b99  | 0 | 0 | 0 | 6 |
| a39f62dbd990e48259b8b80fcd01a3e4  | 0 | 0 | 0 | 6 |
| 879126a84804c1fd7739d08341ab96c6  | 0 | 0 | 0 | 6 |
| d45afd9c9997a393f1eeb20086ba1650  | 0 | 0 | 0 | 6 |
| 350c3291da13627d9780a7b4b5821a8b  | 0 | 0 | 0 | 6 |
| a91dddd914b3d599af16153724f98164  | 0 | 0 | 0 | 6 |
| 450006cf0fbb3a2105c56403beb4819c  | 0 | 0 | 0 | 6 |
| 3e1312a573142202b9d9e6267b73b75e  | 0 | 0 | 0 | 6 |
| 8d3a2488a74b21df63c6fecfac602894  | 0 | 0 | 0 | 6 |
| fbdb1189d391670ac3fdf2614b1eb4aad | 0 | 0 | 0 | 6 |
| f5ce9e4a254579bb0a7f8701c77d1cda  | 0 | 0 | 0 | 6 |
| cdb128c99d36cc4499c559d808d3723e  | 0 | 0 | 0 | 6 |
| c1d6203b4cf833a09f552dd7dbb60ef0  | 0 | 0 | 0 | 6 |
| 5b16b85ca6acd527f260705701176015  | 0 | 0 | 0 | 6 |
| 3f66b2a034a2add56734114d855910d   | 0 | 0 | 0 | 6 |
| acb006a7733835209f48d0e29828b702  | 0 | 0 | 0 | 6 |
| aad734b26114bc3ac643d829f5986177  | 0 | 0 | 0 | 6 |
| e27dfe57e7b9091b5a0f9f2532e4b4da  | 0 | 0 | 0 | 6 |
| d6b6abdaf56cfc0ef905dfb51fbe2d7b  | 0 | 0 | 0 | 6 |
| edff98400c86cc12c14eafa04887c0c5  | 0 | 0 | 0 | 6 |
| 5a2b8a8f3b76bc1eaed0b7dc8c21510c  | 0 | 0 | 0 | 6 |
| 59ef40a7dfa5ab889b226cd6116e8db7  | 0 | 0 | 0 | 6 |
| 30c875bbb58c994226e8b4c0999b0bc5  | 0 | 0 | 0 | 6 |
| b50b840b906c28a6235fcad5b9490c1f  | 0 | 0 | 0 | 6 |
| 14de72abd3129f633f09d7fb5a338a7f  | 0 | 0 | 0 | 6 |
| 76ed1ce76e3ddcf0afdf72029c75c576  | 0 | 0 | 0 | 6 |
| b4e406e4f251c2285faa9bf7c97d7930  | 0 | 0 | 0 | 6 |
| 84e54ce9db3a89053e3d91637af7d44c  | 0 | 0 | 0 | 6 |
| 0db973c051fb29041cdad5ca0d07ed81  | 0 | 0 | 0 | 6 |
| f44cbb6891af466da73f957baf5f6a4c  | 0 | 0 | 0 | 6 |
| 6cf69aa1757a75efa514f5726c7755ca  | 0 | 0 | 0 | 6 |
| a3893cb7240b27a195fa3abd4cbf0747  | 0 | 0 | 0 | 6 |
| a1969ef11e9793c4b8b494ef0310256c  | 0 | 0 | 0 | 6 |
| 48c1c89038e326d1b9047a7c3c8aeb4e  | 0 | 0 | 0 | 6 |
| 262b8a2706746a832853777b444f51b2  | 0 | 0 | 0 | 6 |
| cbf0355cf2913bce221519f4995a27a8  | 0 | 0 | 0 | 6 |

|                                   |   |   |   |   |
|-----------------------------------|---|---|---|---|
| 9aa503c4d3521d56352fbcdbbc41ac1e  | 0 | 0 | 0 | 6 |
| 90d2d8e54e61a6fafbde54fe340c288   | 0 | 0 | 0 | 6 |
| 821bf270c2affa92fb32bb8241a6605f  | 0 | 0 | 0 | 6 |
| a1cc1c3a14512e34d1a490945735e64d  | 0 | 0 | 0 | 6 |
| 7e7d814fdfd2b0ed027db70cb2665686  | 0 | 0 | 0 | 6 |
| b43a0614c91ea8dc35aec8b7fc67463b  | 0 | 0 | 0 | 6 |
| a7131b8191265c7c19e3ab47f4baa6fc  | 0 | 0 | 0 | 6 |
| b1e4e78a129a8d2a04408d85280efa80  | 0 | 0 | 0 | 6 |
| d90e5f00b750a19f30780551d63d8b42  | 0 | 0 | 0 | 6 |
| ac282a5495d85e033410fb7f83831287  | 0 | 0 | 0 | 6 |
| b0a11abbd4f785ad7c73b47b225ce89c  | 0 | 0 | 0 | 6 |
| 478511c3bcdadf0faa4ce92733af6a7b  | 0 | 0 | 0 | 6 |
| 7fec705ba997cf8c0dd289d63b902342  | 0 | 0 | 0 | 6 |
| 0f70535080f98d0f6dec9a6e452192dd  | 0 | 0 | 0 | 6 |
| 4352f24e222ce5bfba51d6a97d4f9f46  | 0 | 0 | 0 | 6 |
| 68095690201e73481be37488d2ca98ac  | 0 | 0 | 0 | 6 |
| c319efcba6be3d02b7f01c9af3bb2328  | 0 | 0 | 0 | 6 |
| c5396b851efe8d26f2a8ebffbc3ae835  | 0 | 0 | 0 | 6 |
| 130a5b73e9951b6cbf0fe17b49fbc5    | 0 | 0 | 0 | 6 |
| ba5e5f4502bfceec0db960efa6d236f32 | 0 | 0 | 0 | 6 |
| ca9f730426b615708da42d8b8cc20c79  | 0 | 0 | 0 | 6 |
| 08908a1dc5e134c059442e7be76b3d43  | 0 | 0 | 0 | 6 |
| f022abeca7cd65881af729150207f055  | 0 | 0 | 0 | 6 |
| bee7efbf6d2ad206527be2a6164004e5  | 0 | 0 | 0 | 6 |
| 1e322490d8aa90d75a02ca56062cb545  | 0 | 0 | 0 | 6 |
| cc1f65af1d90629f07c3b989149376b0  | 0 | 0 | 0 | 6 |
| 1dcbbd1b82955eb96230ee1d2909950e  | 0 | 0 | 0 | 6 |
| 01a33e5d5a6f9f91845a4657b451a6a3  | 0 | 0 | 0 | 6 |
| 97ae4b7b6d75870e1f17e24648b5a527  | 0 | 0 | 0 | 6 |
| 12f7218187254e5592e6ceafc7aeb0ee  | 0 | 0 | 0 | 6 |
| 1d88b25400a2ac4e3fdcb60098538ef   | 0 | 0 | 0 | 6 |
| a842f789cf221457319cf7a600604fcb  | 0 | 0 | 0 | 6 |
| 1a4787a9cbfbfe1dd783452c376beeee  | 0 | 0 | 0 | 6 |
| f83d51d2d2cffe62d0afb9cce9c5521   | 0 | 0 | 0 | 6 |
| dd6907d5213fc1118451700f7392507b  | 0 | 0 | 0 | 6 |
| be16765f6696036217fb865975967b47  | 0 | 0 | 0 | 6 |
| 4d278cc92c03c5f5dbbfa90280edd858  | 0 | 0 | 0 | 6 |
| 5d553472ddcdd6eaebe6ba99e377d7d4  | 0 | 0 | 0 | 6 |
| 2cd15ecf1e013d72d1b72bde770f63a4  | 0 | 0 | 0 | 6 |
| 358e7ad7dc36d7faa48144795fe71dcf  | 0 | 0 | 0 | 6 |
| ee71400f74b96683bf234094ad2ad5dc  | 0 | 0 | 0 | 6 |
| 49ed1c142e6055b63b9cb9b62cc254c3  | 0 | 0 | 6 | 0 |
| 05441919ec70f83a9cc1c747d36d3edf  | 0 | 0 | 6 | 0 |
| 577dca6ea5861e4b2521029c23f51ef1  | 0 | 0 | 6 | 0 |

|                                   |   |   |   |   |
|-----------------------------------|---|---|---|---|
| 25c85347ffa903b32575e90e922f28da  | 0 | 0 | 6 | 0 |
| ef7a8cb7ef1107354402868942ac99fe  | 0 | 0 | 6 | 0 |
| c2f4cc18f89d0f0c9f6690e598b44f99  | 0 | 0 | 6 | 0 |
| 2e85dea20d793ed58e62b3264cf22ba3  | 0 | 0 | 6 | 0 |
| 0738938f9a6571e9b2d55d6fe0d4001b  | 0 | 0 | 6 | 0 |
| 65d44d7a5e82af27aee95688d614c301  | 0 | 0 | 6 | 0 |
| b470630e4947881ef042f3286e685338  | 0 | 0 | 6 | 0 |
| f3c805064473298c92fb3541d02c7626  | 0 | 0 | 6 | 0 |
| 1ac7f471360d526b7ac96090757003c8  | 0 | 0 | 6 | 0 |
| 400e3eb834d13c3d844e2c709845d06a  | 0 | 0 | 6 | 0 |
| 565ccdff48c9646026ce2e24bed45502  | 0 | 0 | 6 | 0 |
| 5a530331956bdc449927350740188b5c  | 0 | 0 | 6 | 0 |
| cf72bc2a2489e3536fe6b21791ec0893  | 0 | 0 | 6 | 0 |
| 26b76a215b59069f8eafdf2f40c44c2d  | 0 | 0 | 6 | 0 |
| d64b9228fa452bd8c52fbcbb796fbe    | 0 | 0 | 6 | 0 |
| 83455224d6fabba94f613384413c4757  | 0 | 0 | 6 | 0 |
| cd9d259ea91764fa737eb2c2c0806f88  | 0 | 0 | 6 | 0 |
| fc5597e2e74468e5aec65e2d906d3699  | 0 | 0 | 6 | 0 |
| 6c355029d48321940329c47f4bfc0c37  | 0 | 0 | 6 | 0 |
| 07f9c991af36061f92bc00fd7551cd9a  | 0 | 0 | 6 | 0 |
| 0417dd07473710ad1bee9997273a1493  | 0 | 0 | 6 | 0 |
| 051706583d948894f85531blee9446b9  | 0 | 0 | 6 | 0 |
| 89335488432eb0b8eb4ea7c29b6dce67  | 0 | 0 | 6 | 0 |
| 7acbd537b2c1aa2f6491e6dc96fbd405  | 0 | 0 | 6 | 0 |
| 4a2c69042712b81963dabcd54d5a3110  | 0 | 0 | 6 | 0 |
| b3fafdd318c6c5ea08c4729bc6d1f349  | 0 | 0 | 6 | 0 |
| d76e22049a8c937bceae194f9109b45f  | 0 | 0 | 6 | 0 |
| a39b573e32c8703e9c3088f4d4f2a550  | 0 | 0 | 6 | 0 |
| 1a47013f87c96cdfc79776efb9015ba9  | 0 | 0 | 6 | 0 |
| 52ac065dbc856fdde410b4581f7b1983  | 0 | 0 | 6 | 0 |
| 5f29802eeea338d2fd0a83466541c920  | 0 | 0 | 6 | 0 |
| 874038d7ea6c53cfe4af9413ac3a451e  | 0 | 0 | 6 | 0 |
| 9dddcaff282824072cd3bb9dbdff03530 | 0 | 0 | 6 | 0 |
| 79b9bb9bf71705a52cc327c31bbfba63  | 0 | 0 | 6 | 0 |
| a03c7b7bdcd939f0259648c212201f18  | 0 | 0 | 6 | 0 |
| 71b61a1001a3ee83c49f2bc9b18e46ff  | 0 | 0 | 6 | 0 |
| f884e24011a41127c394cd598282e645  | 0 | 0 | 6 | 0 |
| a83beef321c1b44f32afa54da4351d36  | 0 | 0 | 6 | 0 |
| 8af0927ab8d5adcf0e4dde46f4727e02  | 0 | 0 | 6 | 0 |
| eb6b8131f3fd0a2144ac98513b376de8  | 0 | 0 | 6 | 0 |
| 38751c4e1a6896d61e4630375edcb344  | 0 | 0 | 6 | 0 |
| 1b812635191c046dcd7dfa83c42d4219  | 0 | 0 | 6 | 0 |
| 48529438b65cbd199de41e213af6d21c  | 0 | 0 | 6 | 0 |
| d258218c6341b76610f3465a6d4b3155  | 0 | 0 | 6 | 0 |

|                                  |   |   |   |   |
|----------------------------------|---|---|---|---|
| 19da1f0710c05f45947aa9596f3e3c8f | 0 | 0 | 6 | 0 |
| 4ab6061ad5a3040c6ac0991d6e0355bb | 0 | 0 | 6 | 0 |
| ad3db065c71cd58dabd0e0edc64720b8 | 0 | 0 | 6 | 0 |
| 7aeff2e1c8e2d2780b9d9ad220cef754 | 0 | 0 | 6 | 0 |
| bcef08e5a48b3008660b168aef39252c | 0 | 0 | 6 | 0 |
| cd6ddff332232ef6780355cb41f18385 | 0 | 0 | 6 | 0 |
| 669c55de0d2e9b36cfbfa39aa8363c4b | 0 | 0 | 6 | 0 |
| 3eda9671ca0228eee85173dd5855b697 | 0 | 0 | 6 | 0 |
| bde4d5fa13b3e8a9e51fd76342c4d300 | 0 | 0 | 6 | 0 |
| 1788f7c1d1017ec47bc2b2b88dc118fe | 0 | 0 | 6 | 0 |
| db06e90ab690b9bea3c28df93f1078de | 0 | 0 | 6 | 0 |
| 3cdbeb62951864882dff96cd421a10cc | 0 | 0 | 6 | 0 |
| 850639fcb46d65730431123b3a63b5a0 | 0 | 0 | 6 | 0 |
| 717cc7a30fb7b845435d384420fb7975 | 0 | 0 | 6 | 0 |
| 8edf4d00a3123775967b96e7e79d3c64 | 0 | 0 | 6 | 0 |
| 85eeeb2368e26ee0f02725b66be4736b | 0 | 0 | 6 | 0 |
| e586107ff1537fe8996ffa9bf38738a0 | 0 | 0 | 6 | 0 |
| dbaa9904934266334b37ebbb582194f1 | 0 | 0 | 6 | 0 |
| dfbca25d366296253954c8c7596782e1 | 0 | 0 | 6 | 0 |
| cda342c104ca300466eac89e70bfe493 | 0 | 0 | 6 | 0 |
| bee4b17da4e93cd56a6b11ffacfb2992 | 0 | 0 | 6 | 0 |
| f06ce75a48ba270c1f22c638120d57b2 | 0 | 0 | 6 | 0 |
| 1d8cb4cd3c7587cd722bb0db8a34faf4 | 0 | 0 | 6 | 0 |
| 6279e3c6e20d291e7f915891d6be0cbd | 0 | 0 | 6 | 0 |
| 96b1dd30b88ec4143fb064ddf7adc028 | 0 | 0 | 6 | 0 |
| fa57026924e08d48af8866134c526278 | 0 | 0 | 6 | 0 |
| a92f81ee714c7ddf4a23121b710e89d4 | 0 | 0 | 6 | 0 |
| ac24e8b3d96eae02febd04abcd4b407  | 0 | 0 | 6 | 0 |
| e4903cb2889c15b2dc32faf56a622eb  | 0 | 0 | 6 | 0 |
| 62e96db618da653730a02d4dda9c880a | 0 | 0 | 6 | 0 |
| 6cf10858065d8ec0110f24da6ed5f141 | 5 | 0 | 0 | 0 |
| 74db3421b3282667b25ff007ab3d892d | 5 | 0 | 0 | 0 |
| 386eff8b87bac0dae0d621b9070af8d4 | 5 | 0 | 0 | 0 |
| 69b007cce869ce3cd88405247d043021 | 5 | 0 | 0 | 0 |
| c0b95f47f87002160cd4a8aeeb11ef6c | 3 | 0 | 0 | 0 |
| 5d5287b746d8bcfeb187dab89d9408bb | 5 | 0 | 0 | 0 |
| 3a1c9600277d5a12c29345004ef20548 | 3 | 2 | 0 | 0 |
| 46f934a404ceb3b67e2a5bd0476c5e1  | 5 | 0 | 0 | 0 |
| 27b8d0942f21065a6ddd08484656481  | 5 | 0 | 0 | 0 |
| a49674ae20dd5ff2f07225fdb88a2eb1 | 5 | 0 | 0 | 0 |
| ad2e4f0f49659841b3136adf531f8719 | 5 | 0 | 0 | 0 |
| dae7d3e532e3b373c32cbca278f45e27 | 5 | 0 | 0 | 0 |
| e4853b60904eb34a8c3d730cb1b3dfb8 | 5 | 0 | 0 | 0 |
| 0502ac550cf476f5dcc5c0c0d5b17ca4 | 5 | 0 | 0 | 0 |

|                                  |   |   |   |   |
|----------------------------------|---|---|---|---|
| cc5d8a587cf1fc93a907d5e925853eea | 5 | 0 | 0 | 0 |
| 401a8a7c6a3b8bf5335af3882b6e4953 | 5 | 0 | 0 | 0 |
| 27e1b3bb529108621d625641e1651aac | 5 | 0 | 0 | 0 |
| 80d2418c5dede74f45be84b58ffd1def | 5 | 0 | 0 | 0 |
| 67f0f24e0dfd9e0a8f3a6c17bffd3451 | 5 | 0 | 0 | 0 |
| e68fe8658151003d9694ee21436ab697 | 5 | 0 | 0 | 0 |
| 7bbb5a22faa02219a0dff0b14421b972 | 5 | 0 | 0 | 0 |
| 23b77234a06f5ddbaaccb9ba190dd169 | 5 | 0 | 0 | 0 |
| e8244d80b778ec9584ad2c3c3cfbfc6e | 5 | 0 | 0 | 0 |
| c9f9009626c2a26ac5e014ade6812cc1 | 5 | 0 | 0 | 0 |
| 32a7872289285cb9c6cf16244aec9681 | 5 | 0 | 0 | 0 |
| ee7742eb067ba93066423e3f1b06a377 | 5 | 0 | 0 | 0 |
| 539b9f724d0cb77f327294132ba45219 | 5 | 0 | 0 | 0 |
| 6f422c799095bb71ca76d3438424d72e | 5 | 0 | 0 | 0 |
| 3d7768891b45b53eb856fe45937c9e4b | 3 | 0 | 2 | 0 |
| 21b5c5bb97a430969217875a99b4e031 | 5 | 0 | 0 | 0 |
| 93971675c25bd795f254f6b20ce837c9 | 5 | 0 | 0 | 0 |
| 7884f79e1a365c93461a709ce8a242b7 | 5 | 0 | 0 | 0 |
| 3dbb5cc0feb452bf1ff1b1a95651e32d | 5 | 0 | 0 | 0 |
| abbc2455d647118857be511de9e95adf | 5 | 0 | 0 | 0 |
| 190d802fc854d22c719df2229adb204c | 2 | 3 | 0 | 0 |
| 007075d8821bfe259cfd13d3f7b53009 | 5 | 0 | 0 | 0 |
| 75a22e7f4ec989ec5f573c9f58d7b5c9 | 5 | 0 | 0 | 0 |
| afa22e06f040025258084754fdceed3a | 5 | 0 | 0 | 0 |
| cc896745381390ea521037b89bf8c669 | 5 | 0 | 0 | 0 |
| 106752abf818fc26c93eff505ae43ac1 | 5 | 0 | 0 | 0 |
| c5131f1ce9aefc01f78cd1105c232d50 | 5 | 0 | 0 | 0 |
| e33eae4f5179d2947a60dd0fd186747  | 5 | 0 | 0 | 0 |
| 7f8fe3850d4578ff6484a7528b1bb7c2 | 5 | 0 | 0 | 0 |
| 9c0166bad00f36761bd69cf9bc94f155 | 5 | 0 | 0 | 0 |
| b568cdbbc063cbd3351330d144e82521 | 5 | 0 | 0 | 0 |
| d9516cc4ca009171b8700749b8797f1b | 5 | 0 | 0 | 0 |
| f920ce281d3224587dacec8479ae12e2 | 5 | 0 | 0 | 0 |
| 2721c513e55d146854d5f518edb69b2a | 5 | 0 | 0 | 0 |
| 196df4f55a5e4bf6e1e5ed0cb984e6e2 | 5 | 0 | 0 | 0 |
| c24695e378db62db59276b1c556337ed | 5 | 0 | 0 | 0 |
| 100e42177aef80a479069abee89e4183 | 5 | 0 | 0 | 0 |
| 5a55e7348daaf7772e5fa1e03fff3d28 | 5 | 0 | 0 | 0 |
| 423877a9fa16417ed0c3e35ca209f9b0 | 5 | 0 | 0 | 0 |
| 7edca54e83d47577abb4fdb9992f5c69 | 5 | 0 | 0 | 0 |
| 251a2ac9e7afedd63674eeb34af2819f | 5 | 0 | 0 | 0 |
| d14fd94f60de4546c6e745454b2f86f1 | 5 | 0 | 0 | 0 |
| 328faddce372eb7b1aec5b552743e391 | 5 | 0 | 0 | 0 |
| 386aff9b928cb825df54546bfcbaa3a  | 5 | 0 | 0 | 0 |

|                                   |   |   |   |   |
|-----------------------------------|---|---|---|---|
| 8363e9064fee3ea7c434637a2b6e1382  | 5 | 0 | 0 | 0 |
| f68f64750f4df569a031ae2a1305b7a7  | 5 | 0 | 0 | 0 |
| b0304c720b9cb4094bd6ef7387bd4fa2  | 5 | 0 | 0 | 0 |
| 3630abc54dd0c5132f64f8bbf5e75cf1  | 5 | 0 | 0 | 0 |
| bbaecd6cac952e7e784d1bc20fa04021  | 5 | 0 | 0 | 0 |
| 21d65af17e9b7c87807aa3822ed58ea1  | 5 | 0 | 0 | 0 |
| 40eb43809fdcdaaff8fb58f04d44ff63  | 5 | 0 | 0 | 0 |
| cb3d18dc7e843e0dce3f2c27913cd7c6  | 5 | 0 | 0 | 0 |
| bb4720d9552758ea549a052f64156472  | 5 | 0 | 0 | 0 |
| a6c273a15d05818bd80cbdaaff6f31b6  | 5 | 0 | 0 | 0 |
| 58e74b76a8f2b904996cd9d2c450eb62  | 5 | 0 | 0 | 0 |
| ef9ea917dea9ddb9f9f51abecc649e034 | 3 | 2 | 0 | 0 |
| 2c588b3c3c306cbd6240eec508c456d3  | 5 | 0 | 0 | 0 |
| e306b687fed349f3d28ebcf091083108  | 5 | 0 | 0 | 0 |
| 5ccc0a6380b61617f42fbd296ad32b1f  | 5 | 0 | 0 | 0 |
| 5fe622b58e8a605c04c16881e341a47d  | 5 | 0 | 0 | 0 |
| 022a728f5c67ba748afa0ac07a8467a8  | 5 | 0 | 0 | 0 |
| 8ef5e3e90f2d67a4ba7d62fe3d4dbdbc  | 2 | 3 | 0 | 0 |
| 9ce585bcc7d041ec0752cdc363e02656  | 5 | 0 | 0 | 0 |
| 3d908816013aa0ff393446a56b069f    | 5 | 0 | 0 | 0 |
| 9a5b6f7b7f3801dc2c79eb5a621d92f7  | 3 | 0 | 0 | 2 |
| 06726913e39066b78a557ddc5edc7fd7  | 5 | 0 | 0 | 0 |
| 62b6a5ac881160a7f1c2b9be447a9e48  | 5 | 0 | 0 | 0 |
| 994ba23ce6cb4b2cb06916bd6250064b  | 5 | 0 | 0 | 0 |
| a6c308bb365f030e905339b57967cdc1  | 5 | 0 | 0 | 0 |
| 1b1478dc30b303322dc3a7489463be67  | 5 | 0 | 0 | 0 |
| 8126c43cf3d9b71260043b9cff0da46f  | 5 | 0 | 0 | 0 |
| 9c78066981467e3a594be7714e06f87b  | 5 | 0 | 0 | 0 |
| ac2f2e83dda167bc1b472d70f104018   | 5 | 0 | 0 | 0 |
| 81c0b3de403e567933280e505e536a2c  | 5 | 0 | 0 | 0 |
| 01a857b96ddcf09fbf16093b810bb08f  | 5 | 0 | 0 | 0 |
| ae991a32146967d32badfdb43e267b03  | 5 | 0 | 0 | 0 |
| 8ff22dc4081e764a10e2fb1fa6d12e31  | 5 | 0 | 0 | 0 |
| 3554c9b1cc9eabd8e6047446a28dde1e  | 5 | 0 | 0 | 0 |
| 987d0269d66695f53efc4efa1de17b23  | 5 | 0 | 0 | 0 |
| 7b0b1ce0b8fcd5ef8bf42c911e3b93db  | 5 | 0 | 0 | 0 |
| 32b0bd2b9a636f609b94300a2d2be6d8  | 5 | 0 | 0 | 0 |
| 627cc4bf40a45dc0882c4546dc093544  | 5 | 0 | 0 | 0 |
| e8f2350d8a9431c8ca52ab09b9923354  | 5 | 0 | 0 | 0 |
| ca979ef4a195eaa01cec17d9c122419a  | 5 | 0 | 0 | 0 |
| c28519a416ea880efa94578ada102a4d  | 5 | 0 | 0 | 0 |
| 0fb8caf25284e3b3739978df842c1edb  | 5 | 0 | 0 | 0 |
| c235cbcab36eea15a5c1ae9e15dcae64  | 5 | 0 | 0 | 0 |
| b30095710ebd19d8e4bb518b49d62def  | 5 | 0 | 0 | 0 |

|                                  |   |   |   |   |
|----------------------------------|---|---|---|---|
| 97f5f93e1026e86458fbba823b601323 | 5 | 0 | 0 | 0 |
| 109d25e384ba56a3b33ead4619229c3b | 5 | 0 | 0 | 0 |
| ff6f52ac1d2f1f0d3418ce8fd62a1cee | 2 | 0 | 0 | 3 |
| a7d8681289d483ba7c4c16a688eb6c69 | 5 | 0 | 0 | 0 |
| fdabcf0191f4c1c0b391917ea3a1d104 | 5 | 0 | 0 | 0 |
| 7810566493dc3627c53448a059fda086 | 5 | 0 | 0 | 0 |
| 902bae7797045cca4d416296a1542234 | 5 | 0 | 0 | 0 |
| f39d0e982bc60f9be721925189c773d5 | 2 | 3 | 0 | 0 |
| ff8aac2c20b278098843c962ecb20e2f | 3 | 2 | 0 | 0 |
| 1bc55c9d5892ebbf84be1f7bae3109e  | 5 | 0 | 0 | 0 |
| da247c05ed656a10ab5e42e4e6f09517 | 5 | 0 | 0 | 0 |
| 63bd2e5a0312d9d4767ed4d66bcd23b5 | 5 | 0 | 0 | 0 |
| 2b0dc7af81d7da3d225a59ca82cad195 | 3 | 0 | 2 | 0 |
| 94c6a53a4bfa1ac6f7a907b14cc10f9e | 5 | 0 | 0 | 0 |
| bb9907a768c52f5e8d023754ea98dc65 | 2 | 0 | 0 | 3 |
| dba79336abf7e844316e7ff8d8dd0e93 | 5 | 0 | 0 | 0 |
| da3b07ebbf2e7001948cd9687566f557 | 5 | 0 | 0 | 0 |
| 09ef23dc8c1fb062f9656a40bc9ccb3f | 5 | 0 | 0 | 0 |
| e09d09319704d5350430a1014e13a610 | 5 | 0 | 0 | 0 |
| ceadf3037efdf825c74f1249d2f68608 | 5 | 0 | 0 | 0 |
| b65f0ae345495616c4355153b37a9695 | 2 | 0 | 0 | 0 |
| ad13892a7403adbc04e78b2700dfca3b | 5 | 0 | 0 | 0 |
| 7522cac7cb6a5c558a8db1d22d36c11f | 5 | 0 | 0 | 0 |
| 8cae46ea68a8913222f3ca87c5471da2 | 5 | 0 | 0 | 0 |
| 2c3de068c5000afb5ded78b109dbcdda | 5 | 0 | 0 | 0 |
| 643dcbaa4c59d368f5d2765f7a06d8e9 | 5 | 0 | 0 | 0 |
| abc6da3653b246cd1db219c36a08f223 | 5 | 0 | 0 | 0 |
| 6cd4d2c64fe36d1c5016b2ff87e78aa0 | 5 | 0 | 0 | 0 |
| f58c0d712f3302c86dfe8e76fa28ea66 | 5 | 0 | 0 | 0 |
| a85c719370cc2f4cb1248336a6877963 | 5 | 0 | 0 | 0 |
| eb9a292ba74ffbd1c40857fdf52da1c2 | 5 | 0 | 0 | 0 |
| d76a89eaca7087cda39e845efb94a530 | 5 | 0 | 0 | 0 |
| 58a4f90ba7a7ea3ee36ceddfdc02d22c | 5 | 0 | 0 | 0 |
| beba4e4888d37edcefc39e37f1beba53 | 5 | 0 | 0 | 0 |
| aca1f1f9ff600cf89d4f72c504c7e9ec | 5 | 0 | 0 | 0 |
| 2dde2b907a6e05546125d10ade259b3d | 5 | 0 | 0 | 0 |
| 3ff6aeb56232cce44ea62d3ac07c6170 | 5 | 0 | 0 | 0 |
| 1d2dc601c30ca1184229a271ef5ee9fd | 5 | 0 | 0 | 0 |
| 9751d550b74b3887e8c4458229d392cd | 5 | 0 | 0 | 0 |
| ec42f5a125f042d847ecbc17d8274ef1 | 0 | 0 | 0 | 0 |
| f6910c392146c10f0d5f60897f839520 | 0 | 0 | 0 | 0 |
| 5d4041e8b8cb9fbe1bcc0970d42c7e6f | 0 | 0 | 0 | 0 |
| a1707c677d50c0e02032d58b2530507b | 0 | 0 | 0 | 0 |
| 4c18230424a83741984d5fd755b5fbe2 | 0 | 0 | 0 | 0 |

|                                  |   |   |   |   |
|----------------------------------|---|---|---|---|
| 95c03cda8b8161800c85716bc112ff8c | 0 | 0 | 0 | 0 |
| a3fe58c429cb40734bb6af8bc6e5a3df | 0 | 0 | 0 | 0 |
| 324236437a0b8e63a45f55bf19e2176f | 0 | 0 | 0 | 0 |
| bedeb1c978419547dc69dd24347c7994 | 0 | 0 | 0 | 0 |
| e59aaf366d0a2b553e44f3d4d02da250 | 0 | 0 | 0 | 0 |
| 7ec788f8bc973f0759390c08e136ad11 | 0 | 0 | 0 | 0 |
| a0e2c58753873831d73a5b8473193007 | 0 | 0 | 0 | 0 |
| 732de90dc5ad1f682231d2d67bf032ab | 0 | 0 | 0 | 0 |
| a26ad83e8b38e41f0c83026c68f46398 | 0 | 0 | 0 | 0 |
| 019ab3e05d04c12aaed010ebc7891abd | 0 | 0 | 0 | 0 |
| ea6320e347af3fdebe845874b56eb7de | 0 | 0 | 0 | 0 |
| c083b5738a393030dc36da64ca728ec0 | 0 | 2 | 0 | 0 |
| aa300d3e471dedcbee23e60d048153bd | 0 | 0 | 0 | 0 |
| c36e6b092bfa1265e9ae70f6a8346dc1 | 0 | 0 | 0 | 0 |
| 468f6d2d1f19a1ba3f558d395e300d0f | 0 | 0 | 0 | 0 |
| 385c8fb8e5966f598807dd4f8fbaabdd | 0 | 0 | 0 | 0 |
| 7f2db8dd200e88626019368f3e269427 | 0 | 0 | 0 | 0 |
| aa184174ed535e43500980db7a89729e | 0 | 0 | 0 | 0 |
| 8be36195f7e1d3ba9a2eb9cb645b56c5 | 0 | 0 | 0 | 0 |
| 8cecd88904ad23a2f976e07f5a640f95 | 0 | 0 | 0 | 0 |
| 14d0ef9730e98aec29bc3906c3a93ce2 | 0 | 0 | 0 | 0 |
| 8f2b31238645afca5756a0aa8063ab93 | 0 | 0 | 0 | 0 |
| dc02ee8135344e73cd9480054e51a66b | 0 | 0 | 0 | 0 |
| 519b914e86e89562de4e704c07094aa8 | 0 | 0 | 0 | 0 |
| b62c21f7eaf7cbe1b027c1b40cbda1b7 | 0 | 0 | 0 | 0 |
| d45a9560aac23e283559bb7f9af5df75 | 0 | 0 | 0 | 0 |
| f96b01e8beaf5a314e62dc8583a962d1 | 0 | 0 | 0 | 0 |
| f569305f1e5eeab8ad0ba07c228f0b5c | 0 | 0 | 0 | 0 |
| 10dd6c3849a15f1c6fab376ae1c7b02  | 0 | 0 | 0 | 0 |
| 0229fde660ffffc0a5c19addb0043c45 | 0 | 0 | 0 | 0 |
| b68e717544b668c7980e0068e602ac1d | 0 | 0 | 0 | 0 |
| 456dab49efc4b573c36d228b96e1808d | 0 | 0 | 0 | 0 |
| 8a27570890a8eeb26ea8518c7f1ec329 | 0 | 0 | 0 | 0 |
| bd1db22ab9fd60446bdb0a34e8b71784 | 0 | 0 | 0 | 0 |
| e8ccca4006b6406cd6f79d9f6042db11 | 0 | 0 | 0 | 3 |
| 548592b0f9743a554642af506a0edae3 | 0 | 0 | 0 | 0 |
| 8eb72d623a3f53f0360ff27ca0b63b55 | 0 | 0 | 0 | 0 |
| 0afacbcf3e7cc2ff3f3a064a7c533e61 | 0 | 0 | 0 | 0 |
| 89bb6c090bb114b46432d089347c50b9 | 0 | 0 | 0 | 0 |
| ece65cb864d7ab296ce84e92b052e3e2 | 0 | 0 | 0 | 0 |
| 3f37c3b30b7f37287898cfb6c5e5e926 | 0 | 0 | 0 | 0 |
| 51c93492474b418b296111756a54284c | 0 | 0 | 0 | 0 |
| 2aba10efd892387b708edf85808f50ef | 0 | 0 | 0 | 0 |
| c89a71e289d94dd4842d3e63baf3a183 | 0 | 0 | 0 | 0 |



|                                  |   |   |   |   |
|----------------------------------|---|---|---|---|
| 9f9b594ee74fa4830e1b450a33d01a4c | 0 | 0 | 0 | 0 |
| 88ca0951bb3e7006bbdc85515d8b4075 | 0 | 2 | 0 | 0 |
| 07e708441713c91adc56b841c6ad673e | 0 | 0 | 0 | 0 |
| 905f909ea7d3cc0ca022a5350d90dc89 | 0 | 0 | 0 | 0 |
| 9f0110cbcd9f290eff4cdcd1e4c64c0  | 0 | 0 | 0 | 0 |
| 30d2cb1078849848f998a73c0282d34f | 0 | 0 | 0 | 0 |
| b17ecc32537920cee71adc1570de86b2 | 0 | 0 | 0 | 0 |
| 732e58dd70b197c6790d8a6c787c8026 | 0 | 0 | 0 | 0 |
| 20e6268060d93dc171cec948f632f521 | 0 | 0 | 0 | 0 |
| 8efcd1e26d65d71e846df62beb01158e | 0 | 0 | 0 | 0 |
| caaf85f38d1656f9cea6e7132d3f6de7 | 0 | 0 | 0 | 0 |
| 572399ed68682a96894df186ec195905 | 0 | 0 | 0 | 0 |
| 613a4af09356da39a8cda09972d4284c | 0 | 0 | 0 | 0 |
| d6cdc9766922ac0d144eb7caf0c5b721 | 0 | 0 | 0 | 0 |
| 8fd6d38980151b9f741a9b78e3f9cd69 | 0 | 0 | 3 | 0 |
| ceb3164c5f2a85b5af120d13041ceffa | 0 | 0 | 0 | 0 |
| 5b32c0bc2755167b86f7a3c9acc33040 | 0 | 0 | 0 | 0 |
| 8a4cc382871314615dfff14392ef660e | 0 | 0 | 0 | 0 |
| 79df23ce6a837989a82c372a11bec32d | 0 | 0 | 0 | 0 |
| 211c0c87653c46d9f3b1f46dcd9b8574 | 0 | 0 | 0 | 0 |
| f63436fd7ea4720484dc3a88b89c2e9b | 0 | 0 | 0 | 0 |
| 92d6c57ad4494bd267cace63e5e9820b | 0 | 0 | 0 | 0 |
| 403e27e15d32dd0af6a1f5481ecb8064 | 0 | 0 | 0 | 0 |
| ea44ab2a015e28fcd1812f1d413b8d3b | 0 | 0 | 0 | 0 |
| 377d6bf49eafe201647e40f8b32d5de5 | 0 | 0 | 0 | 0 |
| 7d84411527b0a7573332117f0ad2aaef | 0 | 0 | 0 | 0 |
| 045bc66745cd3feb26431177969de384 | 0 | 0 | 0 | 0 |
| 2fde48a731a2346297eddc3d4182a537 | 0 | 0 | 0 | 0 |
| 9408b0e348cac1fc31fef858b559728b | 0 | 0 | 0 | 0 |
| fa8e9422d506176427d33a65e27bb4ba | 0 | 0 | 0 | 0 |
| c8d764c2624dafa46d665f86305d2b00 | 0 | 0 | 0 | 0 |
| 9e76cca91d47906bc99af1ab70857c5b | 0 | 0 | 0 | 0 |
| 9281ed22b6c0bf8894dee8269f00c564 | 0 | 0 | 0 | 0 |
| 654e7681637ba90644a000c3eead051f | 0 | 0 | 0 | 0 |
| 3a1643cf5d7fd058e09030261e765c76 | 0 | 0 | 0 | 0 |
| ce312167f60c2b05d65d565dd8ff32f9 | 0 | 0 | 0 | 0 |
| 5a2c70697b41602243f6185b98c6ece6 | 0 | 0 | 0 | 0 |
| ee91c7a0b123ef055764b5ef9b7f46c6 | 0 | 0 | 0 | 0 |
| a63760a3c73d939e9904f59af11dfa20 | 0 | 0 | 0 | 0 |
| 68d50f8acd33b79d4de4de158120c873 | 0 | 0 | 0 | 0 |
| 43567616593dcbc56d89bb5798c22a2b | 0 | 0 | 0 | 0 |
| d3fb68c03efced83bcdd24800bfefe3a | 0 | 0 | 0 | 0 |
| fbe5b5989a2c0f31ce22adb6f27923fe | 0 | 0 | 0 | 0 |
| 33a247e48350d15ea3e8867b3d152283 | 0 | 0 | 0 | 0 |

|                                   |   |   |   |   |
|-----------------------------------|---|---|---|---|
| c17dd2fa00b7c69221abe40d7bddbbad  | 0 | 0 | 0 | 0 |
| 6d292e4c8cc91c017a6c2064e53ab356  | 0 | 0 | 0 | 0 |
| 8c0e04dea5b67353f1228d4bcbae2011  | 0 | 0 | 0 | 0 |
| 8d38e673cc2564a3512058110a67ee50  | 0 | 0 | 0 | 0 |
| 3088d52e1bbca09eb92101a78c3df085  | 0 | 0 | 0 | 0 |
| a7a6306af221ddb93639ff9696bee2fd  | 0 | 0 | 0 | 0 |
| 2ee15c5982fda210297465d35a119119  | 0 | 0 | 0 | 0 |
| 3b283cb26a8e192bc1a08cbf637d045c  | 0 | 0 | 0 | 0 |
| a12b0c1cea8ff68c6359a501e7118ce3  | 0 | 0 | 0 | 0 |
| f73ac488672d79d78465c21ee0a2e33b  | 0 | 0 | 0 | 0 |
| 42f984c6b0fcb25550df4c458ddd5046  | 0 | 0 | 0 | 0 |
| 92e7a6878e857ec1b4fc3c89b376a07f  | 0 | 0 | 0 | 0 |
| 419fc24218daa17d949e183c4b3bebae  | 0 | 0 | 0 | 0 |
| af61f762a21289cbfd6ac5142c1e9e1d  | 0 | 0 | 0 | 0 |
| caef3bc77dcaea210d7589d73bfbcc2c  | 0 | 0 | 0 | 0 |
| b40b11dcba78c63b2644a0da52be0ff5  | 0 | 0 | 0 | 0 |
| 0faf8ea3cdd8f28d9830265a9ce018a0  | 0 | 0 | 0 | 0 |
| e59a7137be284b7bc197da3c1e52ec33  | 0 | 0 | 0 | 0 |
| 6350f2c07ea52b8fd66b29450a4a7b63  | 0 | 0 | 0 | 0 |
| 337d0bd7e207256daf418da5d068210f  | 0 | 0 | 0 | 0 |
| 0637b49880a488a04a73af3dc76e87dc  | 0 | 0 | 0 | 0 |
| 26efe1112772de0d61d46be9ebe630e9  | 0 | 0 | 0 | 0 |
| c986feee60c3050ca2f42de871365ed6  | 0 | 0 | 0 | 0 |
| c32c004a6dd2573fca6388ae60622264  | 0 | 0 | 0 | 0 |
| ebac7f753d17f2638779534cd67758ca  | 0 | 0 | 0 | 0 |
| a9600e51d5c46b6b008ddc305395e55c  | 0 | 0 | 0 | 0 |
| bd72c34ea5477e644cd51858685f7c59  | 0 | 0 | 3 | 0 |
| 3a3728e7199d101b89f9eb94f29621fb  | 0 | 0 | 0 | 0 |
| 2b18b2298f7f4dc4120920f935758263  | 0 | 0 | 0 | 0 |
| 8243f5326dc8cc4f4cc4d165a68e0542  | 0 | 0 | 0 | 0 |
| f3aa3969fa4d3c66186501c27c49c2ed  | 0 | 0 | 0 | 0 |
| 36edb4f20d4d86d23e5c141daef009c5  | 0 | 0 | 0 | 0 |
| 690af7279fbf18f55d6731a71dda8a25  | 0 | 0 | 0 | 0 |
| 1ede19d64c55209cfac7503085456953  | 0 | 0 | 0 | 0 |
| 1a870c68c0a6a030866e101a60e2504e  | 0 | 0 | 0 | 3 |
| ac0a6e6ef215c7c6fb59f6884547b173  | 0 | 0 | 0 | 0 |
| 3d605a0ef341d745958b7ffc972b4af1  | 0 | 0 | 0 | 0 |
| c50fad9c910a686c89e2a8fb70dfac3bb | 0 | 0 | 0 | 0 |
| 8581bab9d0a5aaab1fd8e4f0aae70db7  | 0 | 0 | 0 | 0 |
| e7afe07f99e1f9007da4dfd099e4a66a  | 0 | 0 | 0 | 0 |
| 76cbaea9645f5ffbf21cda50c2cd1f49  | 0 | 0 | 0 | 0 |
| 4b4d7d79926e6aa2c9a5bdd0b5b8835a  | 0 | 0 | 0 | 0 |
| 95eab9b6c65fa12d64030eee1663e93c  | 0 | 0 | 0 | 0 |
| d4c64d4afda135226d9c08a4d3c790ff  | 0 | 0 | 0 | 0 |

|                                  |   |   |   |   |
|----------------------------------|---|---|---|---|
| 00b1d0951198c733782214d011e0c5c4 | 0 | 0 | 0 | 0 |
| 6c95f642a37c0976733c6b47f71e28fb | 0 | 0 | 0 | 0 |
| d9cf8dfedcb0ee7e4e74a21ce76e457c | 0 | 0 | 0 | 0 |
| 8256a5d028426149c5e799aff027ad3e | 0 | 0 | 0 | 0 |
| 2625c41dea6d7c14c86f57732f96d9e7 | 0 | 0 | 0 | 0 |
| 89e48b5c178099ded1766b4f24839459 | 0 | 0 | 0 | 0 |
| d5be956a0442923fcfe4af77b89efcbf | 0 | 0 | 0 | 0 |
| ea03d1d056769559373bc13d3e10ce52 | 0 | 0 | 0 | 0 |
| b38334dfe15c46d2169fab46c3087eca | 0 | 5 | 0 | 0 |
| 40aa28133ae7804c6ce65d003a337b27 | 0 | 5 | 0 | 0 |
| 47c9130fd111ead7c62911f35453e366 | 0 | 5 | 0 | 0 |
| 4e0a5bf2d79bba895d26496d2ac17f7e | 0 | 5 | 0 | 0 |
| 018c451622b553c4f876523725716fa4 | 0 | 5 | 0 | 0 |
| bd627a1a90732b7a02e73578819050c9 | 0 | 5 | 0 | 0 |
| 48df3a187e99033777bbac6970e4c2fc | 0 | 5 | 0 | 0 |
| 603f25fb38b0ac140191c59f0440cf22 | 0 | 5 | 0 | 0 |
| b76e168ef4feb8fe1910de8df8a6580d | 0 | 5 | 0 | 0 |
| e5c852f72672290b156e4f80cc1f031c | 0 | 5 | 0 | 0 |
| ba0efaa4c3183c3479f592293c5e5c9c | 0 | 5 | 0 | 0 |
| f846e3eaccf6edeeddc66c9e7e405c3e | 0 | 3 | 0 | 2 |
| 0c20c4b599fd68947208c70840d01b7a | 0 | 5 | 0 | 0 |
| 36a06e579dca73c12aa4bb68102b710e | 0 | 5 | 0 | 0 |
| 48deab714bda8db1f6fc73895bbe17c2 | 0 | 5 | 0 | 0 |
| 6bcc42ca49d987f9e0464ee4083a7ebc | 0 | 2 | 3 | 0 |
| 101d86810685a5ed0fc482fa4a415259 | 0 | 5 | 0 | 0 |
| 73fcb10c5f948243c276cd073e3fbe5  | 0 | 5 | 0 | 0 |
| 5bc0d85d00e87ad469db18be4bf9d5e4 | 0 | 5 | 0 | 0 |
| 9127de1945cf9b291415a10c8fb28160 | 0 | 5 | 0 | 0 |
| 1d71ae9e088cb11fab6ac926e319c905 | 0 | 5 | 0 | 0 |
| e01a70143d5e82ca974d6e2468ee00fd | 0 | 5 | 0 | 0 |
| 8dc93d11409b41816130548508277995 | 0 | 5 | 0 | 0 |
| c6fdd80a9a484ace3ac9287a6ff754be | 0 | 5 | 0 | 0 |
| a48e3b79d5402897297d10dfbf00565f | 0 | 5 | 0 | 0 |
| fc3860a9932b6a296ceead3bd266b19a | 0 | 5 | 0 | 0 |
| bdec4ca67b98ea3ef16e80e24f4e9060 | 0 | 5 | 0 | 0 |
| 183184d802a422af10cc8654db6a14ad | 0 | 5 | 0 | 0 |
| b4019cb6c9ac61a50d089c6d17fc21b4 | 0 | 5 | 0 | 0 |
| 55d7c8eedd4de9f16a4a02124acee0bb | 0 | 5 | 0 | 0 |
| d3ab86bfc94e7a37a6fe6a0ea91e94c6 | 0 | 5 | 0 | 0 |
| f651c0da8e922087a3dd2b5d22f4ebad | 0 | 5 | 0 | 0 |
| a9f351a788a7f4fdfa5a5bd4be5c12d1 | 0 | 5 | 0 | 0 |
| 74a30a13f86b19849e87a6218e581ebe | 0 | 5 | 0 | 0 |
| a1fa105aed40a165522a743169859328 | 0 | 5 | 0 | 0 |
| cf937478735eb86e017c779afb8728fc | 0 | 5 | 0 | 0 |

|                                   |   |   |   |   |
|-----------------------------------|---|---|---|---|
| fd54699e5988b443b3886ed14be82677  | 0 | 5 | 0 | 0 |
| e8ef69e59b4390c01b6739aaeb4c6a15  | 0 | 5 | 0 | 0 |
| ba2bb3d11fd8752ad9067c91f234a3c6  | 0 | 5 | 0 | 0 |
| 43c0282ef2433636edfb38e490d54c02  | 0 | 5 | 0 | 0 |
| ca9bb249b34e752b711e827ad065533b  | 0 | 5 | 0 | 0 |
| f924aef00d10ac052fb8ae371cbcd96d  | 0 | 5 | 0 | 0 |
| a113ecc4fb39a886ddb4e22b26ad8266  | 0 | 5 | 0 | 0 |
| 359b32dbfab34e6540517fea1e6e7358  | 0 | 5 | 0 | 0 |
| ad9457cbf818c8447d44d4b80879f73f  | 0 | 5 | 0 | 0 |
| 0a62bbbd820cfb971344837d3a67089c  | 0 | 5 | 0 | 0 |
| bd7d328ea7645069ba936e49ac6e1c0a  | 0 | 5 | 0 | 0 |
| fcca51f13a26574959dddd657c31b95b  | 0 | 5 | 0 | 0 |
| cc5fff192b9303ce927ff6bffbde5d513 | 0 | 2 | 0 | 3 |
| 88632cb76c35e65dd0aed87654c34ae2  | 0 | 5 | 0 | 0 |
| 97f7552347e4012d9d6738e915cbc8b3  | 0 | 5 | 0 | 0 |
| 72cce28b94ce394cdb2a9c400e8a5072  | 0 | 5 | 0 | 0 |
| daa0257d34a5d0a522c47e40f3d95a04  | 0 | 5 | 0 | 0 |
| f1498b861b7ce27c751778dc0221a3e4  | 0 | 5 | 0 | 0 |
| bf49a02f49a238669346a4e431d648f1  | 0 | 5 | 0 | 0 |
| d640cdd18999822bf1a4a9f4fc8211e3  | 0 | 5 | 0 | 0 |
| a040c3630b81c386198a843b410ef9e9  | 0 | 5 | 0 | 0 |
| 5f21243903eb736439c2b4b9587877de  | 0 | 5 | 0 | 0 |
| e742c5221307fc5b5c317b6da51b2f7b  | 0 | 5 | 0 | 0 |
| 08a8637dd5d4e30f65dae403810ef1b0  | 0 | 5 | 0 | 0 |
| 32992cc045e7d692ba39f47980f93a37  | 0 | 5 | 0 | 0 |
| bff6844d9f77d181802807379a8563b2  | 0 | 5 | 0 | 0 |
| ee5717849377e569709cba508fc15b8a  | 0 | 5 | 0 | 0 |
| 313f334f696114ee8f05f3755f496498  | 0 | 5 | 0 | 0 |
| 4083719fafa66f2c73d8498118a1161b  | 0 | 5 | 0 | 0 |
| d2702718f14ec40c28db4ae404f9d7db  | 0 | 5 | 0 | 0 |
| 54e3fcaee0a0999fc88f6bd0718c50da  | 0 | 2 | 3 | 0 |
| 09c33192a2ff39cc65641675a48540d0  | 0 | 5 | 0 | 0 |
| 4a3519c8c426521343c82bb081973624  | 0 | 5 | 0 | 0 |
| 03896659bfff45ff766faa36da25eb712 | 0 | 5 | 0 | 0 |
| 3a473ff52b90eed3a01095e13034cf7f  | 0 | 5 | 0 | 0 |
| 85c0b613932bfeeb12a92c790cfcfe91  | 0 | 5 | 0 | 0 |
| 3e58496ce7c20b6f7a5063a6d303d610  | 0 | 5 | 0 | 0 |
| 11897864f6f8c0180a8f221601efb75c  | 0 | 5 | 0 | 0 |
| e453c2381fcfbcd2d4db69b653819be09 | 0 | 5 | 0 | 0 |
| c91354da6f0aeaad04c6524a437366a6  | 0 | 5 | 0 | 0 |
| ecce18f6fa4fb98d1159528efb009d61  | 0 | 5 | 0 | 0 |
| 9d1d85fcd895499c7499990215205f13  | 0 | 5 | 0 | 0 |
| ac578340514904b7b0caf5b181efba8c  | 0 | 5 | 0 | 0 |
| 449d537f68ef3cc0d45c9cdbf03e583f  | 0 | 5 | 0 | 0 |

|                                  |   |   |   |   |
|----------------------------------|---|---|---|---|
| 554f34a8ec1398c36979cd8bffd6c66  | 0 | 5 | 0 | 0 |
| 67692638a7dade821e9ad2912b3c7db0 | 0 | 5 | 0 | 0 |
| 731f3e881d8296a099d72d574e8684c8 | 0 | 5 | 0 | 0 |
| 23884869fdb20b33ecd2b46e7009196  | 0 | 5 | 0 | 0 |
| 18c1e63d5f5831bbccee527c05de3278 | 0 | 5 | 0 | 0 |
| 20a1c6bbebfcc2bdb4a1685cc56b1a95 | 0 | 5 | 0 | 0 |
| 1021149cb69368b48723038ebd911e15 | 0 | 5 | 0 | 0 |
| 316411356d559d7f6a383b946814f1c5 | 0 | 5 | 0 | 0 |
| 09adee38e4c84fc49c45ee085e73978c | 0 | 5 | 0 | 0 |
| 6fd4e41542b1194b8fd8f4dc638e6782 | 0 | 5 | 0 | 0 |
| 7f3664a6191ce535dbb2de5693aac607 | 0 | 5 | 0 | 0 |
| 1480a07f02e85eb8c2257d70f1842899 | 0 | 5 | 0 | 0 |
| 140e036fdf413cf723e2576f33cb3be9 | 0 | 5 | 0 | 0 |
| 741ce7dbb3389a4da76135e40b3a829c | 0 | 5 | 0 | 0 |
| a5348d41b151cf57eb7f12fa8d7364a9 | 0 | 5 | 0 | 0 |
| f328462836b816c79a4f4cf5f7a125f1 | 0 | 5 | 0 | 0 |
| 917851ea28e40b10521daba195bcd23  | 0 | 5 | 0 | 0 |
| aa48b44f4abaf2707fe670e0af25442d | 0 | 5 | 0 | 0 |
| 9de71e763a750ee7ba5ab93b89b63895 | 0 | 5 | 0 | 0 |
| 1e58d028158f54f4c681635cfb620fad | 0 | 5 | 0 | 0 |
| 8deb1a97118e90972efc38e179de0659 | 0 | 5 | 0 | 0 |
| a6ea2b2f8304ca95f201bb84cdff6ef2 | 0 | 5 | 0 | 0 |
| 8ed5ff033d373cd7d2936c3f0ee1f3b4 | 0 | 5 | 0 | 0 |
| 46a8b0165a8015975064014bf18e449a | 0 | 5 | 0 | 0 |
| 96a4d56ef8e41a9c0ac7501c2e2bb160 | 0 | 2 | 0 | 3 |
| ff656a91c451150d24af3ecaaea978c8 | 0 | 5 | 0 | 0 |
| c9ad891e310803644ce25633d7fe2680 | 0 | 5 | 0 | 0 |
| b3a7d4f5a4626db605caba9aae290449 | 0 | 5 | 0 | 0 |
| 31cf22a63537eecaca6d521573659cc9 | 0 | 5 | 0 | 0 |
| d551baf40029d5b1af339856fe47e1be | 0 | 5 | 0 | 0 |
| be65ee84d8c192a1505a7ea4d1ded931 | 0 | 5 | 0 | 0 |
| 4f7c02b8e8df54eab4a463eb9574e424 | 0 | 5 | 0 | 0 |
| ddc6f897bbdb27299b0842ec89f1f0d2 | 0 | 5 | 0 | 0 |
| 339d764fb89d5341f1a106e6e432fe2d | 0 | 5 | 0 | 0 |
| 2ef8459c947cca3c1a44f37cb0d3bc25 | 0 | 5 | 0 | 0 |
| 77d7eca6b34fd20b27b2f828a433e725 | 0 | 5 | 0 | 0 |
| f94b1e7517064bb3a7576e991e8b56be | 0 | 5 | 0 | 0 |
| 2751ad9c784dfcb40f728087b8e5af77 | 0 | 5 | 0 | 0 |
| acb51b1e68a2f51ca311ef445b3ee2c0 | 0 | 5 | 0 | 0 |
| 34c9eff726f02c7ac301f88316b9b1e1 | 0 | 5 | 0 | 0 |
| bbc8ac858854024acd48ec6e9c2053f5 | 0 | 5 | 0 | 0 |
| f899c5a1e8bf74521d1897f18a030c07 | 0 | 5 | 0 | 0 |
| 2acf6197f92b7d9c44b1d04b9c3c6c83 | 0 | 5 | 0 | 0 |
| 6469e0003dc820300c0e3d657e84ae95 | 0 | 5 | 0 | 0 |

|                                  |   |   |   |   |
|----------------------------------|---|---|---|---|
| 57504eae9018a8e096aefc9bace0c4d3 | 0 | 5 | 0 | 0 |
| 0e59870296819eebbfee6a4a5319873d | 0 | 5 | 0 | 0 |
| 77e55f53ec6d516467e246db17dfa196 | 0 | 5 | 0 | 0 |
| 05ec31c74534615892efbdde0c641e18 | 0 | 5 | 0 | 0 |
| 3f2d7c5c998222535ee32e10523ed312 | 0 | 5 | 0 | 0 |
| ed536c93c3fe0a4f91a2eb61850890d9 | 0 | 5 | 0 | 0 |
| eae877eae01939ea2d57a8d9ac9b7740 | 0 | 5 | 0 | 0 |
| 58c13c5d9ebb049e98ccb2b1197c1a34 | 0 | 5 | 0 | 0 |
| b3558f110d86177eb2198a117fccb3fa | 0 | 5 | 0 | 0 |
| ef3cefe231f1d5722429032da3ca8bf5 | 0 | 5 | 0 | 0 |
| 4d47f16b29ae6d90ce86d0fad5b4a1a0 | 0 | 5 | 0 | 0 |
| 7e5e7b97e9f53ce1fa66c1d8d2154398 | 0 | 5 | 0 | 0 |
| 3ff307ac7bb71df00880024feb37c4ed | 0 | 5 | 0 | 0 |
| 76c14148df03926f380c01d2d13f3302 | 0 | 0 | 0 | 5 |
| a76b76c19befb1c0be1104773cc207be | 0 | 0 | 0 | 5 |
| 49865092adcf43f54519b9656714e73c | 0 | 0 | 0 | 5 |
| e94ed4ce565456721b7975eb85b33aa4 | 0 | 0 | 0 | 5 |
| 640e94a0c55bcbd8f37158dac2d677b9 | 0 | 0 | 0 | 5 |
| b70c4921c5b16ffdcac29334cf8b472f | 0 | 0 | 0 | 5 |
| cd59cd3515ca0bd9381f0babd2d70d3b | 0 | 0 | 0 | 5 |
| ab9079849063f3e53adf0ef6f53ae114 | 0 | 0 | 0 | 5 |
| 036fcb29a097ebc3195fc7c2e9617acd | 0 | 0 | 0 | 5 |
| 86f4a899969f8dfb36831133c82981af | 0 | 0 | 0 | 5 |
| 7afeee87aa11a213d4d9957ea25658b7 | 0 | 0 | 0 | 5 |
| 2a5b2d1cf848461742e3ab704fbfbe72 | 0 | 0 | 0 | 5 |
| 698e430a5344dd954f41fd26e33a67a5 | 0 | 0 | 0 | 5 |
| 9aac17e9d0f73efa63071d81ab2d2cde | 0 | 0 | 0 | 5 |
| 87c62d2929402345d8f45c001c83e908 | 0 | 0 | 0 | 5 |
| 058bf239f937f5eac5fe7fdfe40b8649 | 0 | 0 | 0 | 5 |
| 1f8bba2afbf6da48efd97da8c7757e96 | 0 | 0 | 0 | 5 |
| a03b0c3d7bb5e69b53f45a8c90b9db21 | 0 | 0 | 0 | 5 |
| 1a2268738b5afb5933d62e6d1c751a8b | 0 | 0 | 0 | 5 |
| 9bcf492226bce6a0591c05c87d4a68b8 | 0 | 0 | 3 | 2 |
| 13c98abbe8b15ecbbb860324293faa01 | 0 | 0 | 0 | 5 |
| f07d588060ca9a76c00443cd8797aca6 | 0 | 0 | 0 | 5 |
| 2c07f82dc3f5897910a10b2938c0a0e4 | 0 | 0 | 0 | 5 |
| b37824c1f51064f33d44675861dc4995 | 0 | 0 | 0 | 5 |
| 2f28fbfd4eb1fd2bdca115ce92a5192f | 0 | 0 | 0 | 5 |
| ad6bc444ad4ed45ef9d39835f9433a5d | 0 | 0 | 0 | 5 |
| 1b56d002d9b189094f1849e54e329ade | 0 | 0 | 0 | 5 |
| 648a2730aa2c82ee02b735eff87b545c | 0 | 0 | 0 | 5 |
| 7ff5d7c2b570aca12d6cc15ff2f33d63 | 0 | 0 | 0 | 5 |
| 45ea2d4d4c36c84e9675e55160c6171b | 0 | 0 | 0 | 5 |
| c0d20a95a839c06cb8bf70902387c476 | 0 | 0 | 0 | 5 |

|                                  |   |   |   |   |
|----------------------------------|---|---|---|---|
| d4356dba3df72d92d0f8d009ee1c3557 | 0 | 0 | 0 | 5 |
| 6a6f3dd25ccf27f0fa9e38ec62c58d9a | 0 | 0 | 0 | 5 |
| 9ea3617ab5f2d7bf301a61e07960c13e | 0 | 0 | 0 | 5 |
| ae612a9a22e3fd2ada5a3ee9ec04591f | 0 | 0 | 0 | 5 |
| c0873abeaeac577c5fa24a2edac9f9e6 | 0 | 0 | 0 | 5 |
| e14b4113cc6f9d08dc5a5d6a6e797ac9 | 0 | 0 | 0 | 5 |
| a77f0fa144b69fef0dad38f5a3ffbfd0 | 0 | 0 | 0 | 5 |
| 3bf0980e83a53f2d6cbca4f65ab2fedc | 0 | 0 | 0 | 5 |
| 6ade603cd4323f90d27a89c3362072b3 | 0 | 0 | 0 | 5 |
| 2de46b1373cecb000b9d00a5881ec07  | 0 | 0 | 0 | 5 |
| 4c5086200b5d52fd2df471e6ab658ce9 | 0 | 0 | 0 | 5 |
| e6b2704ec120e619e8012163b9273cf1 | 0 | 0 | 0 | 5 |
| e11f7d3d1ba6d20fc293833694a3f536 | 0 | 0 | 0 | 5 |
| f83f7088445febb653c2b63f7db921e1 | 0 | 0 | 0 | 5 |
| 3c55ba0653343785640f5897cfe6a713 | 0 | 0 | 0 | 5 |
| 3ded36e4999bb67abee0094c3765c06d | 0 | 0 | 2 | 3 |
| 4e0d2fb588638a0cf6a6313a7637d01c | 0 | 0 | 0 | 5 |
| cabbde19225e9c76bb32b04607172ad1 | 0 | 0 | 0 | 5 |
| b435f5ba642f212ff8c4b513e777a203 | 0 | 0 | 0 | 5 |
| c15a86e73f563f346a555729a04e8c07 | 0 | 0 | 0 | 5 |
| f1dfef36bc6b40b140a9a62849b6d83a | 0 | 0 | 0 | 5 |
| a34f8090bace8ce2669482169c4d97f5 | 0 | 0 | 0 | 5 |
| 8212990bc5e8d7cd83130d47f3ce43cb | 0 | 0 | 0 | 5 |
| 767e04ef7217594ad3f97acd2237d0ab | 0 | 0 | 0 | 5 |
| c65c9b7a06c9e36c27c80744ac85117f | 0 | 0 | 0 | 5 |
| 8a6f27d91764b6587a670db2d19ed6cb | 0 | 0 | 0 | 5 |
| 9bab2c1fe7ce07f7fd79054a2e09fd88 | 0 | 0 | 0 | 5 |
| 7caeaac37ab0c6ed259b9cbd044ee83  | 0 | 0 | 0 | 5 |
| 1426806445d427a24693f0566e39d6be | 0 | 0 | 0 | 5 |
| 4739f557a923545391b17638782be41a | 0 | 0 | 0 | 5 |
| 1c0e1c90c23677447ad0a5aa85f1b7bb | 0 | 0 | 0 | 5 |
| 2a7cb81acfe7ad11b7377a69685e338e | 0 | 0 | 0 | 5 |
| 79ba3d5fc09253414d0154d2e1bad4b5 | 0 | 0 | 0 | 5 |
| 993c5ffb873bc04dca62c9c7ef430e14 | 0 | 0 | 0 | 5 |
| aecf12258a01faf542c22f048c0c240d | 0 | 0 | 0 | 5 |
| aa3c933dca17f1eb40b2896bf3fcf7b1 | 0 | 0 | 0 | 5 |
| ebcf9605b5be7475fbfd217dc62e077c | 0 | 0 | 0 | 5 |
| a6c1a0d1776645905a2bdd6e15f11f87 | 0 | 0 | 0 | 5 |
| 552d25367569ebc8361efca2eef5f214 | 0 | 0 | 0 | 5 |
| 67008e86d35beb54b31b9a275fd16d29 | 0 | 0 | 0 | 5 |
| 583d2ce08f323c22c0dc88bef72ca901 | 0 | 0 | 0 | 5 |
| 6db744d8d3cef721ac1d87852a6a909f | 0 | 0 | 0 | 5 |
| 3c26aad1491a594e7b8e6a29904902bf | 0 | 0 | 0 | 5 |
| e5facbbb502f237add91af02605c1790 | 0 | 0 | 0 | 5 |

|                                   |   |   |   |   |
|-----------------------------------|---|---|---|---|
| 3e71f0a96a188b6497aa60d9005f9be5  | 0 | 0 | 0 | 5 |
| f244f84d22f69034ebeb310d8e77b300  | 0 | 0 | 0 | 5 |
| e3bf36be770b95f5206ebc8cdf864949  | 0 | 0 | 0 | 5 |
| a2afc0a2dd70407a54dd3f2c7b922f4a  | 0 | 0 | 0 | 5 |
| c4ca201652a11d0ccb93ca9a533416fb  | 0 | 0 | 0 | 5 |
| 027298bb951a43f6b7aeb45cb40349d6  | 0 | 0 | 0 | 5 |
| c098b86a7a23b6701a8e8b42c70bd4ac  | 0 | 0 | 2 | 3 |
| e25d40dea54aac96a610b2f54ebb7fd2  | 0 | 0 | 0 | 5 |
| 3640dfdc79624d5c6964ac737b71f682  | 0 | 0 | 0 | 5 |
| bed4e8be21ed091d0692a5ad108ac1e6  | 0 | 0 | 0 | 5 |
| e7e2c5adad4ea14b561b2d95a8a71a5d  | 0 | 0 | 0 | 5 |
| f8ad667dee0c2a60a1520e778e7be46d  | 0 | 0 | 0 | 5 |
| c88a452cd1427d3293be690e571156a9  | 0 | 0 | 0 | 5 |
| 936497a444373525fce6d83b8fdcf604  | 0 | 0 | 0 | 5 |
| c8638cb74c01830f7fec06a7452e48f0  | 0 | 0 | 3 | 2 |
| 7ae1cb166f70da50d80c05b29c16e34d  | 0 | 0 | 0 | 5 |
| d497bdc7f5fa692695d2f0b4f061335f  | 0 | 0 | 0 | 5 |
| 39dfaedcb560f62870a00dde20e73042  | 0 | 0 | 0 | 5 |
| 04bd81abd61e3ebe4a2a9fc88f7ee8ed  | 0 | 0 | 0 | 5 |
| cb928b59cf715d900b06024b88b80f35  | 0 | 0 | 0 | 5 |
| 2b2b5d83d27bf05339fe75753a711f4a  | 0 | 0 | 0 | 5 |
| 8f8205065d99159683cf62771cc85a62  | 0 | 0 | 0 | 5 |
| 879bb8eeb511bd5ce6a3304bf57a9fc0  | 0 | 0 | 0 | 5 |
| f25e354c553cd8fffbbee984c8b25daaf | 0 | 0 | 0 | 5 |
| bb0caf6912e3bdf1047987cda5ae9b00  | 0 | 0 | 0 | 5 |
| 3192c203552f8ecaccb524c68c1c2422  | 0 | 0 | 0 | 5 |
| fb289812f18c0d0fed5efde5571dabf3  | 0 | 0 | 0 | 5 |
| c47ee613f9ba2c6bbefdeba7564962c7  | 0 | 0 | 0 | 5 |
| 62477ba59fc3dad07a76e9cbab6759df  | 0 | 0 | 0 | 5 |
| 0ded54c65d7c8daddfc6abfa1dfe0169  | 0 | 0 | 0 | 5 |
| 3668c1e98c55ed72fa14083febe570e4  | 0 | 0 | 0 | 5 |
| cb7409365716c7fa6a657c31476fe8ef  | 0 | 0 | 0 | 5 |
| e5ba9a113a53ebbec2aec23cddb2691   | 0 | 0 | 0 | 5 |
| aeaf493b2a90d021f22e07d769d88a85  | 0 | 0 | 0 | 5 |
| 2840f665c62b58ac19371b1691901e0b  | 0 | 0 | 0 | 5 |
| b4f9f10e7741df4ebcb064ff6c3368e9  | 0 | 0 | 0 | 5 |
| 2f314ec74a6e8f24f2048308d5f35346  | 0 | 0 | 0 | 5 |
| f9045466670b6931f811987c6be39baf  | 0 | 0 | 0 | 5 |
| de36c6349ef6fa4f2f18038e0b269a90  | 0 | 0 | 0 | 5 |
| c7a2d1dc6f1e650cfd4f384128a32ec1  | 0 | 0 | 0 | 5 |
| 66f9bc50e15b316ccd32b0ca7532d176  | 0 | 0 | 0 | 5 |
| 6888ceb76ab3df12a64e46b9ba000d10  | 0 | 0 | 0 | 5 |
| e9e388296df0f25ef886365f8358d77b  | 0 | 0 | 0 | 5 |
| 966b0a715c26dbd1c8b8cfd088aebf7a  | 0 | 0 | 0 | 5 |



|                                  |   |   |   |   |
|----------------------------------|---|---|---|---|
| b484b840604f66f608c0fb9f7d920f7a | 0 | 0 | 0 | 5 |
| 656033fe0a6492f5a3586bb7c1d42231 | 0 | 0 | 0 | 5 |
| 163f8dc33264f8e2840252792796a7b1 | 0 | 0 | 0 | 5 |
| bd0c0b511f43ee20f3af9a398e4f92e3 | 0 | 0 | 0 | 5 |
| 7080746a60096471c3d26752f9bf59f3 | 0 | 0 | 0 | 5 |
| 6046e707817ec0e2571ffcbcee3d69b7 | 0 | 0 | 0 | 5 |
| 3297d83397d84b02b7be44f378be42a5 | 0 | 0 | 0 | 5 |
| 1cea98f95575e9ee027693becab8cf0d | 0 | 0 | 0 | 5 |
| 336ae4325190fa5557d4b3d5eb559ced | 0 | 0 | 0 | 5 |
| ae72e9538f99f4e7722972853135721f | 0 | 0 | 0 | 5 |
| 7ceb8e366359fa45393f7ed127c52797 | 0 | 0 | 0 | 5 |
| 9e9c3f24547fcaf98e913ece993ae59d | 0 | 0 | 0 | 5 |
| 41607dc9b82c83a484bd8fe065396c55 | 0 | 0 | 0 | 5 |
| c742b11a1efd9739ebfe46dedd0118cc | 0 | 0 | 0 | 5 |
| 5981e6480c205bb32bfec0fb880fee73 | 0 | 0 | 0 | 5 |
| 4098ade3b11916d2df208c75a00611f7 | 0 | 0 | 0 | 5 |
| 72222bf11a078da6ee86bb6601582b28 | 0 | 0 | 0 | 5 |
| 017619113bfc515be2ea469fd73b64e7 | 0 | 0 | 0 | 5 |
| 4aa31099129733ff48404270668fdd0e | 0 | 0 | 0 | 5 |
| eeecc105202a7f8ebf570ba23a961c21 | 0 | 0 | 0 | 5 |
| b531271597cd5620b9c065df7c165481 | 0 | 0 | 0 | 5 |
| 19dcbe19cefa5e8e3eb3ee0a8c184ea2 | 0 | 0 | 5 | 0 |
| a40f727a69492fe51904f70d7c9f1ccf | 0 | 0 | 5 | 0 |
| 64e80d40a07191285521c611da3daad9 | 0 | 0 | 5 | 0 |
| 01e56d3cd84a83a9ddb8eb4eab92e024 | 0 | 0 | 5 | 0 |
| afb9abdb9123564689ec5d421d86c8da | 0 | 0 | 5 | 0 |
| 11ce1d6ed8547694f97e25efb68e632a | 0 | 0 | 5 | 0 |
| 9bd7f44b06699cd36330b1b2f1e99e3d | 0 | 0 | 5 | 0 |
| 157004f6c3984ed924c170781ccfc2b7 | 0 | 0 | 5 | 0 |
| ac6c332dca7c558e796cf96f744fc06d | 0 | 0 | 5 | 0 |
| 8d1caf07c5a8d6148e4a50823cf11e7c | 0 | 0 | 5 | 0 |
| f8367b79e979ff518d65cd34c415ddb  | 0 | 0 | 5 | 0 |
| e770a18d5a869f3a1f57be0baade9b31 | 0 | 0 | 5 | 0 |
| 28e50058a719abad14099f80ce169382 | 0 | 0 | 5 | 0 |
| ea93e435ce8a7068ec1d249e4c6c0a99 | 0 | 0 | 5 | 0 |
| 00bd96f761377ce0fe364153de185ada | 0 | 0 | 5 | 0 |
| 06f65551d28a183fb98afc86fe88e934 | 0 | 0 | 5 | 0 |
| cd15c86bb4309779962440d9bb519ab6 | 0 | 0 | 5 | 0 |
| 9f3f993c274d5cbbec86406a32a6f8ae | 0 | 0 | 5 | 0 |
| d9a1ec4f2b85b8f8eae14b418be16774 | 0 | 0 | 5 | 0 |
| d42230eb77741ecdb5fd44b48398c999 | 0 | 0 | 5 | 0 |
| 1b72826b648bce6a7671b8db383a685d | 0 | 0 | 5 | 0 |
| 359788f3dee2adbd0110bcde2f091e83 | 0 | 0 | 5 | 0 |
| eedc4f62cdc3081a8fd44a517151eb62 | 0 | 0 | 5 | 0 |

|                                  |   |   |   |   |
|----------------------------------|---|---|---|---|
| 01c571dee0dd0d23b0d96acb3c0e4aa3 | 0 | 0 | 5 | 0 |
| b11a5551548424f82c26a2e3e73e7691 | 0 | 0 | 5 | 0 |
| 7d009853667d49761979194acc585429 | 0 | 0 | 5 | 0 |
| 2c9ad692c0ee5f1c816ef6f904bc59cf | 0 | 0 | 5 | 0 |
| 72d8698db6ecc7f92cd541cc6c96d354 | 0 | 0 | 5 | 0 |
| f829b9e372b776e7b8ef01ae48f9ac16 | 0 | 0 | 5 | 0 |
| e013ca65a0c21b7d07491f8b002b43d5 | 0 | 0 | 5 | 0 |
| 23b5288de638d4481a8de75e0140c6e5 | 0 | 0 | 5 | 0 |
| 392b0701053b3546d54ccddece135924 | 0 | 0 | 5 | 0 |
| f76042f7d582871d07540dbbad9778d5 | 0 | 0 | 5 | 0 |
| fca8711212013c410b5f03693b7e1507 | 0 | 0 | 5 | 0 |
| defabf9c497cb31cce5529d9b4740743 | 0 | 0 | 5 | 0 |
| 4a7f21a5e33a40422121a852768bf819 | 0 | 0 | 5 | 0 |
| 905eeb08118782db2c002d06ca84fad8 | 0 | 0 | 5 | 0 |
| 33d1c319a5569e80db4dbde4ba2414c5 | 0 | 0 | 5 | 0 |
| bc697a235d5dbbb60959786acc86b44e | 0 | 0 | 5 | 0 |
| d0225d3ed72282df1828cf3ebb6ce3b6 | 0 | 0 | 5 | 0 |
| 0f8cdcf60caa6cc553bbffc00cbb2881 | 0 | 0 | 5 | 0 |
| 6d9875344d3ccac14a1e954501a506ec | 0 | 0 | 5 | 0 |
| 7b0d02a55097e0fe1ad507b80b253a27 | 0 | 0 | 5 | 0 |
| 64f1176a7fa6c94d76d518057b10cb65 | 0 | 0 | 5 | 0 |
| e52749d2054ef1c01e3c5079411d5244 | 0 | 0 | 5 | 0 |
| 5313e222edc4cf8f5448639278b49ef5 | 0 | 0 | 5 | 0 |
| 389d79603b00f9b59eba697b8aabb79a | 0 | 0 | 5 | 0 |
| 532df1fac923f136260ae63d07701d4c | 0 | 0 | 5 | 0 |
| ba71c03305a26917ff720f09d90365fd | 0 | 0 | 5 | 0 |
| 35992d959009dd90a75550e676a54810 | 0 | 0 | 5 | 0 |
| b9df39aa65dbfaadf0c1c13470d0546  | 0 | 0 | 5 | 0 |
| ea7c52ca89135783a281f74daf3f8cf7 | 0 | 0 | 5 | 0 |
| e363aa05a7f27507f9352dd1066fe1fb | 0 | 0 | 5 | 0 |
| 12da4aee92eaca3517b51e2c9b049fc4 | 0 | 0 | 5 | 0 |
| 4ed954307f158f2e36ccdd5a355d6808 | 0 | 0 | 5 | 0 |
| 31cd083cfd8cbf4d74bf37b00d82314b | 0 | 0 | 5 | 0 |
| 28e86eb128c7cf21cfe15be9a1da6298 | 0 | 0 | 5 | 0 |
| a8dcfdc1e6448f6afb9cfdb7d4c32659 | 0 | 0 | 5 | 0 |
| 2fdc6dc0f635d1c59de9b4c1f9c6feda | 0 | 0 | 5 | 0 |
| fa68a6cbef423e99f564d25b1c3f04d4 | 0 | 0 | 5 | 0 |
| bb20ce2200b37e87d596d9eda924543c | 0 | 0 | 5 | 0 |
| 6d3ffe2296aa436af5b389b8d34e89a2 | 0 | 0 | 5 | 0 |
| 1921b70fe351ed3c851e14dcfe16677f | 0 | 0 | 5 | 0 |
| 9904b2c2a1b97cac13cb8784e374dc21 | 0 | 0 | 5 | 0 |
| 2bded924b595cb11a9f0f01bf3438649 | 0 | 0 | 5 | 0 |
| 1d98eb92a1bf7eab375648f6ebf1f434 | 0 | 0 | 5 | 0 |
| 92e49c645e93fb088b42d58a7cc1c213 | 0 | 0 | 5 | 0 |

|                                  |   |   |   |   |
|----------------------------------|---|---|---|---|
| 87b66190073eccaf2d01dfaa060d41b6 | 0 | 0 | 5 | 0 |
| 0118ea8f723fb48de7b5c138cd71c8ef | 0 | 0 | 5 | 0 |
| 5f7d1114cd17343648d3b7974355cdd5 | 0 | 0 | 5 | 0 |
| e07079131807f634e0f3565496605582 | 0 | 0 | 5 | 0 |
| a483817575efbc0e6753cc25a92c25fc | 0 | 0 | 5 | 0 |
| 6d00144e16bd8129d7893345c1592768 | 0 | 0 | 5 | 0 |
| 9e3c7503f044604c9bf58c6609080e9d | 0 | 0 | 5 | 0 |
| ad8e4aa9045cf418f244b758561842f8 | 0 | 0 | 5 | 0 |
| fb6be51fbf11708555a7fd550849fb3  | 0 | 0 | 5 | 0 |
| 0063a885c65c326a2474f11e86ed2ba2 | 0 | 0 | 5 | 0 |
| ca3d034f3213ee7ade74f9bcf88a0cfd | 0 | 0 | 5 | 0 |
| c4eef80b221ff7a65ccd467acd1bf066 | 0 | 0 | 5 | 0 |
| 4302fafcec4a84653f591d460ce7e460 | 0 | 0 | 5 | 0 |
| 5ba5a1a272967dabde68d5bb11996387 | 0 | 0 | 5 | 0 |
| bdc9bbbe9c85d271f8d4ab8af99a3ea3 | 0 | 0 | 5 | 0 |
| 0e34f9f0412765debd49cdc7e5a0264b | 0 | 0 | 5 | 0 |
| 921b5d8562db71d8828afa55a2e74d8a | 0 | 0 | 5 | 0 |
| e6bb26d4c7fcafb7f4fa4c5cf672745f | 0 | 0 | 5 | 0 |
| a6cd31e6a4132ea8ce58a0aa8aadaa75 | 0 | 0 | 5 | 0 |
| 23c3cd04294818477fa61b2876fb0139 | 0 | 0 | 5 | 0 |
| 8208e99609d67039be14629c4993ed39 | 0 | 0 | 5 | 0 |
| 7b0e3a115f4024adbe5210e2fa2aee94 | 0 | 0 | 5 | 0 |
| e46e19cfcea05bed80356cd05b5bc11c | 0 | 0 | 5 | 0 |
| 3409b1ca00b87d10a6aff99724c93b48 | 0 | 0 | 5 | 0 |
| a2d5cd015975da4ed0c8ab50aab80bf9 | 0 | 0 | 5 | 0 |
| 8ac685e7093e14c42c4cb79c62c954ee | 0 | 0 | 5 | 0 |
| 55a118b611056057792cb03adfea11ca | 0 | 0 | 5 | 0 |
| aff2b361f196a540958ff6d79dfb7f41 | 0 | 0 | 5 | 0 |
| 0072b0040e39e5d64afc5038682721dc | 0 | 0 | 5 | 0 |
| 3a53d00be6153d4eeb10fed00909a61a | 0 | 0 | 5 | 0 |
| 8e612e4f9933e2710dfd168e6a4f0a89 | 0 | 0 | 5 | 0 |
| 083c8fd85d8b77ceba8560af40123516 | 0 | 0 | 5 | 0 |
| 19515288924a7c66a1bfd5b7f9ea1a34 | 0 | 0 | 5 | 0 |
| 15619f8634f42545633d9e7b9efe80a1 | 0 | 0 | 5 | 0 |
| 2d49d4b2e6baaf509433deec8ebd6e5e | 0 | 0 | 5 | 0 |
| 56068840dc9405ed1ed0bf569b44036a | 0 | 0 | 5 | 0 |
| a1e851a6b92b61a507c50603ef11f373 | 0 | 0 | 5 | 0 |
| 04aaae3fc467876b83f90875355de247 | 0 | 0 | 5 | 0 |
| 3c147b321fc32d4339c4545dd6b3e43b | 0 | 0 | 5 | 0 |
| b2486dda6842734461112869f8b9328f | 0 | 0 | 5 | 0 |
| 1380aef1746e190a8d6cbc127c49e3c9 | 0 | 0 | 5 | 0 |
| 92b7e2c682e03b18322a40b5ac9ae914 | 0 | 0 | 5 | 0 |
| 85acc4fe77449bcaabd69cdd76ef08a0 | 0 | 0 | 5 | 0 |
| 3e5ae08fc74e475b1af33349039b8d4a | 0 | 0 | 5 | 0 |

|                                    |   |   |   |   |
|------------------------------------|---|---|---|---|
| 18082e74f8bf78b66d0d0837b3911ced   | 0 | 0 | 5 | 0 |
| 4034e8ae493a6772e9858845eadfa074   | 0 | 0 | 5 | 0 |
| 7db46826ce2e02f255d1dff22c1e6c0f   | 0 | 0 | 5 | 0 |
| 459b5ede9d41e4ea4daffdbfa247103a   | 0 | 0 | 5 | 0 |
| a8707eb406f0f4f6512fa5d962621ce0   | 0 | 0 | 5 | 0 |
| b95ec65a6c75fd985194430eea2eb92a   | 0 | 0 | 5 | 0 |
| 7ce3010f0ba8882b3e4ca79607f3ec98   | 0 | 0 | 5 | 0 |
| b1f91531addaadbb56478e0d2d38baef   | 0 | 0 | 5 | 0 |
| 2807b5d6c64771713b435b2a146017c8   | 0 | 0 | 5 | 0 |
| f0d1d40ddac1c00c7c66a0ee7c9a7136   | 0 | 0 | 5 | 0 |
| d40f6c6665ffb1179a3a9f88b8007754   | 0 | 0 | 5 | 0 |
| eb16c3d0239d4ac6877878dd7b0e5891   | 0 | 0 | 5 | 0 |
| 75d8fb4549d15f589a5ecb45e43e0ef7   | 0 | 0 | 5 | 0 |
| eee975cbbbed15d6d74fba3e834eef71   | 0 | 0 | 5 | 0 |
| e20412b52a4306c0745468d69883b4ea   | 0 | 0 | 5 | 0 |
| e7e04cf3d995019672e83c0f398d7593   | 0 | 0 | 5 | 0 |
| a7e89aa6e16951b9dded1585baf3b9a0   | 0 | 0 | 5 | 0 |
| 2012ca940b76e175c8bc8caf8e0247a5a7 | 0 | 0 | 5 | 0 |
| 092479837addb7dafa864a5525c32f7d   | 0 | 0 | 5 | 0 |
| e7fba272ded448b0b39066ad38e10012   | 0 | 0 | 5 | 0 |
| abac65951b8a52c1917bc4082d86d3a6   | 0 | 0 | 5 | 0 |
| 153dcdd39f92501b48c823552763e0d1   | 0 | 0 | 5 | 0 |
| c1eca37a6e7afaa10a03c77daa293a3a   | 4 | 0 | 0 | 0 |
| 45dedf11d9955992b6aee4ef30c370a8   | 4 | 0 | 0 | 0 |
| 9aed6d999d018873938f7349115d8dbd   | 4 | 0 | 0 | 0 |
| 3f9aa985729e86aee741e96633795b14   | 4 | 0 | 0 | 0 |
| 16d4ea6817d267a36f82ed14e4e085a0   | 4 | 0 | 0 | 0 |
| fe8f67c5f8aaebc5284a38301efc21df   | 4 | 0 | 0 | 0 |
| 174da36013e9aaa5393e47213f64f12f   | 4 | 0 | 0 | 0 |
| 662b05d9796b7f94edd98339a2e3a3bb   | 4 | 0 | 0 | 0 |
| 611815b3f1693b0d0cf3199af2455c24   | 4 | 0 | 0 | 0 |
| 6b19854788ad89d5ad8658cef38c78ae   | 4 | 0 | 0 | 0 |
| 96c468aad57a7b3e1ab58f57d5ce4534   | 4 | 0 | 0 | 0 |
| 470d788b1d28826ca350366748cb5b74   | 4 | 0 | 0 | 0 |
| cd2af5a9a205d9574387d2e5586be9c8   | 4 | 0 | 0 | 0 |
| a245683c3c2292f9e2e773cefb8e3566   | 4 | 0 | 0 | 0 |
| a540f2b3df1ac5d6385a05831a3700df   | 4 | 0 | 0 | 0 |
| 97019885d4185dda12e7b2734fbc8c5c   | 4 | 0 | 0 | 0 |
| f30b6c41ddd41b8a2edc073994730031   | 4 | 0 | 0 | 0 |
| 97ba64002508464f498b269c856777bd   | 4 | 0 | 0 | 0 |
| 55adf7f690904ecabcaccd54a72018c6   | 4 | 0 | 0 | 0 |
| 7bb4312eb3eb9a87f99e775ac2eb8cd1   | 4 | 0 | 0 | 0 |
| e5c3289acc12bb7d7902a413c805eb09   | 4 | 0 | 0 | 0 |
| 29a957e393816bce84aa8d739f034613   | 4 | 0 | 0 | 0 |

|                                  |   |   |   |   |
|----------------------------------|---|---|---|---|
| 4631850712b681863eb3a6ba4be4d916 | 4 | 0 | 0 | 0 |
| 4278fc964914b6b5635b1919880b4fbd | 4 | 0 | 0 | 0 |
| 373d760092fb6b19f4e529d84299ab8d | 4 | 0 | 0 | 0 |
| c2abb9560cf730b33674408786a7ae61 | 4 | 0 | 0 | 0 |
| 41d8d4219fe208f31de4a97f70c29180 | 4 | 0 | 0 | 0 |
| ce9da6922acb0ed59bef8501f9f0f148 | 4 | 0 | 0 | 0 |
| 7dbc4080fe843f76995d2773a38a5b8f | 4 | 0 | 0 | 0 |
| 57b2f06876abd3edfee18c1ba9459c9b | 4 | 0 | 0 | 0 |
| ef1f2344593fd3a2b487c9a834ef7531 | 4 | 0 | 0 | 0 |
| 9234e54261ff14c0897465a6727a07f1 | 4 | 0 | 0 | 0 |
| 54cab691e70c19dc88c6c8c251f2b136 | 2 | 0 | 0 | 2 |
| cabb9eddb6c6b5a62be21d2cc212a17  | 4 | 0 | 0 | 0 |
| 5f323b564b39396cdd783f4cd00e9c82 | 4 | 0 | 0 | 0 |
| 0aa764249513217a597cf1186a6a97d1 | 4 | 0 | 0 | 0 |
| 62b735ffcf0508490c678c8d5cb62821 | 4 | 0 | 0 | 0 |
| ae4e658423925a091042f43368770c16 | 4 | 0 | 0 | 0 |
| d0e2603d6f820697e02c0c09ec3f294d | 4 | 0 | 0 | 0 |
| b164a7abbfd1502570a199a60cd9ed7a | 4 | 0 | 0 | 0 |
| e29595a51bdbfa36b4988435e1b42d06 | 4 | 0 | 0 | 0 |
| 369a81bebfcd1d9d9fbedb71807eb1d1 | 4 | 0 | 0 | 0 |
| 9aaa0780a68b619024246b8a932f1a79 | 4 | 0 | 0 | 0 |
| 3a3ad4d975ab2ed3e1dc85c492d21ed1 | 4 | 0 | 0 | 0 |
| 6c0ca949b38a3495036a166b0a9c049b | 2 | 0 | 0 | 0 |
| d1a6beb6f18c7d910516adb639fa5a4f | 4 | 0 | 0 | 0 |
| b3b6aa85162ef5022eaa7d2c107eaa5c | 4 | 0 | 0 | 0 |
| 4067c46b578b5a84c523ead91c4b2528 | 4 | 0 | 0 | 0 |
| eb1784c90387805f15e5b57acbafb912 | 4 | 0 | 0 | 0 |
| 1105695302aede17e0bfc9eb3601f14  | 2 | 0 | 0 | 0 |
| 584f808aadb2c95276eff53dceb0a08f | 4 | 0 | 0 | 0 |
| c6056ec359b531de258849dc54d84bd0 | 4 | 0 | 0 | 0 |
| 121150d1e7d3fa459770da2353b0916a | 4 | 0 | 0 | 0 |
| 3ac2b01cc1ec4b4ade8209da1a9ddb39 | 4 | 0 | 0 | 0 |
| c1dab48dc787f207191209dac1e537ea | 4 | 0 | 0 | 0 |
| f5fbf188b5cccc471f791e16be099387 | 4 | 0 | 0 | 0 |
| c4c5e2a61ffe5c2371b680d9672f8879 | 4 | 0 | 0 | 0 |
| cc4ca7221abc82a4c4f6432668c68d21 | 2 | 0 | 2 | 0 |
| bf81d62da5c0e6ef5d436b4628e536d4 | 4 | 0 | 0 | 0 |
| 874f78700dec43ad2baf692cc21c3462 | 4 | 0 | 0 | 0 |
| f7e1fefeba212652adddf19ff75c3d64 | 4 | 0 | 0 | 0 |
| 53a828197ff9354fc94548b5a4a0c0e8 | 4 | 0 | 0 | 0 |
| 7f5887d571b147a50a8d2b06ee69d9bf | 4 | 0 | 0 | 0 |
| 8621c1186edbbb214e8e83c694a3b605 | 4 | 0 | 0 | 0 |
| 01c87e46fe991ccc14a42e0b9160b1f5 | 4 | 0 | 0 | 0 |
| a76754171adcba3e7c0b9f1d87c49541 | 4 | 0 | 0 | 0 |

|                                  |   |   |   |   |
|----------------------------------|---|---|---|---|
| b85e7ae9ebbd5ccee6d1c1d96cf3c195 | 4 | 0 | 0 | 0 |
| a7b90b54a7c24711d07e51831429aeed | 4 | 0 | 0 | 0 |
| d2e4157938b7eacefae597b653108297 | 4 | 0 | 0 | 0 |
| 27f80efa1dad1204eff1d8444636b158 | 4 | 0 | 0 | 0 |
| 4b319b9f6a2f4bf9e7d808567e5485b0 | 4 | 0 | 0 | 0 |
| 792aa9275fa0dda7fbf243e10759d01b | 4 | 0 | 0 | 0 |
| 7b3b523c951c44cbe6102cadcce32c4d | 4 | 0 | 0 | 0 |
| ff37519f0d3caed1752c0ea6709ba25c | 4 | 0 | 0 | 0 |
| 52fbec2665080a224b263aa3045bff4e | 4 | 0 | 0 | 0 |
| 1827f5ce51dfb2f16360ed2371ee80b6 | 4 | 0 | 0 | 0 |
| 22e979fdff80964f6b2646b6ab31402c | 4 | 0 | 0 | 0 |
| 1905510a48578c895c35990962064185 | 4 | 0 | 0 | 0 |
| 9ced36d5add8d9da297b33e3d3d8aa5d | 4 | 0 | 0 | 0 |
| 2a36fe30a3537575ce17a2f11034a3a1 | 2 | 0 | 0 | 2 |
| fea0d84f2d96c9d7ef44c92e8b16bb44 | 4 | 0 | 0 | 0 |
| ff1ca0601cbc0fbc552f15c44c0b14d4 | 4 | 0 | 0 | 0 |
| d13dc288452d94da8246f52c1f94483c | 4 | 0 | 0 | 0 |
| 1608c86b75699e42c18d047d32e004e3 | 4 | 0 | 0 | 0 |
| cd8d2333646a558d902e7038b442f0f5 | 4 | 0 | 0 | 0 |
| 7008929cc6c6555966f2beed9f972385 | 4 | 0 | 0 | 0 |
| 2dcf47a8796bfc014b9b3321ea94979a | 4 | 0 | 0 | 0 |
| 3c65126e4174c06d1822e5dcf241e9a3 | 4 | 0 | 0 | 0 |
| 2dd20d02762c48b2877ad47c075c1ef9 | 4 | 0 | 0 | 0 |
| d008c9ebef516098df2065e55cf0ada4 | 4 | 0 | 0 | 0 |
| 6226d96e07262bd7e6a1c889e052f856 | 4 | 0 | 0 | 0 |
| b603865a7c3d9221efe2766cf6ca5a18 | 4 | 0 | 0 | 0 |
| 60bfacd28ce2c31dfd326b1879cd54b0 | 4 | 0 | 0 | 0 |
| e07160e4c4d5526cbd7e0a13eaa76f1a | 4 | 0 | 0 | 0 |
| c59f8e7ad0504ca48a4925f060475454 | 4 | 0 | 0 | 0 |
| 5063b7169491e128e5b97ecdef1a9adf | 4 | 0 | 0 | 0 |
| 6556c076a59d8a5f39b2f1c094a622d7 | 4 | 0 | 0 | 0 |
| c64ff5528087a6f368236fd7819f1a99 | 4 | 0 | 0 | 0 |
| cd0d1c9137835f76bcd52348130be91d | 4 | 0 | 0 | 0 |
| 529fb07cb2c571fdb000f33055b6a539 | 4 | 0 | 0 | 0 |
| 9d2be4794bea8755d6d09a87e3a9dfe0 | 4 | 0 | 0 | 0 |
| 8775a529f49f0978f2f5856694cf6da0 | 4 | 0 | 0 | 0 |
| 3638d56bee85be96af520dfd36e8818e | 4 | 0 | 0 | 0 |
| f6ba6066841712e35f92b8ff4cfbd6d8 | 4 | 0 | 0 | 0 |
| 3637ec9b435b9e59d14e9a7f24d8f805 | 4 | 0 | 0 | 0 |
| 4dc6cfa1b67166341344d6c7e91ad07b | 4 | 0 | 0 | 0 |
| be7d559ab33dfef3234661bfc113da01 | 4 | 0 | 0 | 0 |
| e7996536a67a8a7dcb1b0df62a25d3f8 | 4 | 0 | 0 | 0 |
| 928d455f4b6a2df95f061f5ad7bbd007 | 4 | 0 | 0 | 0 |
| 57acc6d1194ce4072efe67a10b5293da | 4 | 0 | 0 | 0 |

|                                  |   |   |   |   |
|----------------------------------|---|---|---|---|
| 38fe4b27f230480c663312256ae783d0 | 4 | 0 | 0 | 0 |
| 8c8c70a19ade5d955ea2dde076053e68 | 4 | 0 | 0 | 0 |
| ac1413cbceb6d545c216f4429f0a3f8c | 4 | 0 | 0 | 0 |
| 44ff6c580872489c4cf3fd97870c96a7 | 4 | 0 | 0 | 0 |
| 829e63d30a3a2b908c8dae93656852a9 | 4 | 0 | 0 | 0 |
| 88319e9483e6588d37b7c9cfccc1c70a | 4 | 0 | 0 | 0 |
| fc15c054f90a93632dcdbc1ac16b3e11 | 4 | 0 | 0 | 0 |
| 8639616314ba19bf50853f50cf6043dc | 4 | 0 | 0 | 0 |
| dbd5d19b6735a2ae7c181c79dbccb5b3 | 4 | 0 | 0 | 0 |
| 52fefdb11bfac2ca81038d5b6d39fae1 | 4 | 0 | 0 | 0 |
| 54939dda7cf4fa6c0b6e6b3d87d6440e | 4 | 0 | 0 | 0 |
| 60a6ba35a57aa5a4ae37c5e1fd39786f | 4 | 0 | 0 | 0 |
| 0abcaec89d2e227df68776779e8ff18d | 4 | 0 | 0 | 0 |
| 281563ad237fe023e3c6a08472f560b4 | 4 | 0 | 0 | 0 |
| 0fa29b05a528da55fce7e9fdd1eb937d | 4 | 0 | 0 | 0 |
| 50d11976794526b1e4d541d05fc4418f | 4 | 0 | 0 | 0 |
| ace274b9bfad1d12cb53cb5855f88e70 | 4 | 0 | 0 | 0 |
| 20f1a1b360cee38b33db5eae81778b6d | 4 | 0 | 0 | 0 |
| 09389c3f39a5e40f0b6375b5f8438927 | 4 | 0 | 0 | 0 |
| f1a211b6d4de599eb99e99baf36a9f75 | 4 | 0 | 0 | 0 |
| b1f58314cda7f6537e85afdddf761b03 | 4 | 0 | 0 | 0 |
| 0fef3e63dde03e5e9399c4ad65ab3989 | 4 | 0 | 0 | 0 |
| 31c6707b22cce57d75826cc99a85dd70 | 4 | 0 | 0 | 0 |
| 1e069277707ca55185b5eef720e65280 | 4 | 0 | 0 | 0 |
| 6b75f51c74742247247df0725500512f | 4 | 0 | 0 | 0 |
| 58b15d251c6e0c5e1856a688516fe5f1 | 4 | 0 | 0 | 0 |
| c00b4fd81ba57355e456aa90962b5345 | 4 | 0 | 0 | 0 |
| 62e4ba1948af1a360b90cea723b73731 | 4 | 0 | 0 | 0 |
| c3e03e40ec7436179ef206aa38132ba9 | 4 | 0 | 0 | 0 |
| 3f4c4be0cd28d7d8a2189c9e4d7d58b0 | 4 | 0 | 0 | 0 |
| d114fc157a57245de77cc331e8957ecb | 4 | 0 | 0 | 0 |
| fb248fe3dbad100a493219e5112c4df3 | 4 | 0 | 0 | 0 |
| f9eb2ddbc126b83dab12866965f2fb88 | 4 | 0 | 0 | 0 |
| 70c253bdf08c93763ecad1705247f657 | 4 | 0 | 0 | 0 |
| c0c0be46b3e70f038024c8a1e34ec4b2 | 4 | 0 | 0 | 0 |
| be3886697bb9349501f9a5a28915f43f | 4 | 0 | 0 | 0 |
| 727eb9b1be258dc95adb1a83e424b13a | 4 | 0 | 0 | 0 |
| 579de4ba27523b567266a9251d6de84a | 4 | 0 | 0 | 0 |
| a74267e0ca38ca524c8366c408218abb | 4 | 0 | 0 | 0 |
| f56fe608f9b74e697bc8019b57c58c45 | 4 | 0 | 0 | 0 |
| 12bf47bf9401cb8d1603b7536c822a33 | 4 | 0 | 0 | 0 |
| bb4df16e79578be2bf4acd1675098928 | 4 | 0 | 0 | 0 |
| 93769bba1ab0857537723cf0d3ef00f5 | 4 | 0 | 0 | 0 |
| e7bdcbc4af16c64ec893b0ea9027bc49 | 4 | 0 | 0 | 0 |

|                                  |   |   |   |   |
|----------------------------------|---|---|---|---|
| c5fa63172678c3b94061830f40556d6f | 4 | 0 | 0 | 0 |
| 0a06b5748f15ad35d2c467fa26c39609 | 4 | 0 | 0 | 0 |
| 52f70b1a88dfa1e480fb282b97bbd7d8 | 4 | 0 | 0 | 0 |
| 37242b08fe02107d61430b045c43489a | 4 | 0 | 0 | 0 |
| b0514a5fee218851908c0f98ba3e3a21 | 4 | 0 | 0 | 0 |
| b02c9a89f9a3c7ed63ad009232e9ab03 | 4 | 0 | 0 | 0 |
| 9465e8748ee51342bfb19874161fb8fd | 4 | 0 | 0 | 0 |
| f3965940e5f2f42dba470c91cbdc8eb8 | 4 | 0 | 0 | 0 |
| 36430f028f071886aead7d9bb3a88cc0 | 4 | 0 | 0 | 0 |
| d791585e86f8d6983e8f462588a21687 | 4 | 0 | 0 | 0 |
| db40c812341cfeb115b948963593c6bd | 4 | 0 | 0 | 0 |
| cb00a344e0ae33aa4474e3c51750cee7 | 4 | 0 | 0 | 0 |
| b92181345c8eaaf3c6e51723acac36e7 | 4 | 0 | 0 | 0 |
| be4a98390673f53dcf145b2166513865 | 4 | 0 | 0 | 0 |
| bfa92166f6732df7ff1f3fef9a2e1cd8 | 4 | 0 | 0 | 0 |
| 17dd8158783a314de44f28c0d353b622 | 4 | 0 | 0 | 0 |
| 610d631e21ed8e14834c88df54cc6c06 | 2 | 2 | 0 | 0 |
| 5dc8c46f70c4051b31db3e6ab8ffd612 | 4 | 0 | 0 | 0 |
| 12c1617442951b8e9342df020691f55c | 4 | 0 | 0 | 0 |
| 749757e9a60959d851e29826cc9e5e4c | 4 | 0 | 0 | 0 |
| 9b9606b239322f9fbf175f9bd6e7a555 | 2 | 0 | 0 | 2 |
| 41d13d0b64203d9225d5802c0f530ddf | 4 | 0 | 0 | 0 |
| 3942f3a0e36db5aa6fd33b02c6747b5f | 4 | 0 | 0 | 0 |
| 0be27a416e5eac52cfb343d03a42f8d9 | 4 | 0 | 0 | 0 |
| aabbc864b39c0ca2ca6a867a5fd28b2c | 4 | 0 | 0 | 0 |
| a0cc9a4a1c2f7cc851e0e3d9b412df58 | 4 | 0 | 0 | 0 |
| 49146ad10952902fac4dc7c1ad88d6ae | 4 | 0 | 0 | 0 |
| 1ef8493be786007d321d848c13194d70 | 4 | 0 | 0 | 0 |
| f07dba37296694cfbb555c0620023818 | 4 | 0 | 0 | 0 |
| 680e1d3c32dd7f69ebff4183c364305a | 4 | 0 | 0 | 0 |
| 3d5ac6ab8259b4210c07f7dcffef3f66 | 4 | 0 | 0 | 0 |
| f324df0010de6de177ce76b5f7be776c | 4 | 0 | 0 | 0 |
| 144ac787290f46d02724eab94c4f83f9 | 4 | 0 | 0 | 0 |
| 9a1c898cf6de5e55a38b1f97264d6a74 | 4 | 0 | 0 | 0 |
| 179315cc27c81813a0c449b8a2822d1d | 4 | 0 | 0 | 0 |
| 562ca06e69f7855ff3afe07f837ec69c | 4 | 0 | 0 | 0 |
| cad4fec1a951586f7abf7b6aa2524d4b | 4 | 0 | 0 | 0 |
| 02faf0a2cea151d029a10ac86e726d85 | 4 | 0 | 0 | 0 |
| 2a4eaae4878d1743c3e84856a7758203 | 4 | 0 | 0 | 0 |
| de26ef5f1f412a23b90f2f14eb8facf3 | 4 | 0 | 0 | 0 |
| 595c8f6880cd23502068d658952ecaad | 4 | 0 | 0 | 0 |
| 619a895ee927fcf200515ac28c3d1742 | 4 | 0 | 0 | 0 |
| a8b227b4c2ab4006796984275563b442 | 4 | 0 | 0 | 0 |
| 8c4ea193c3ea34ed4d6d3c25f9886c42 | 4 | 0 | 0 | 0 |



|                                  |   |   |   |   |
|----------------------------------|---|---|---|---|
| ffefd4c8c658232c17d457b032885421 | 4 | 0 | 0 | 0 |
| cb283ab58bafc5b3c9cd7b3c2b66c4f8 | 4 | 0 | 0 | 0 |
| 2483587d6c4e51719231f44c38a6c07d | 4 | 0 | 0 | 0 |
| c68e3dad9f4a492081f2f7053edab736 | 4 | 0 | 0 | 0 |
| 4e9255cfe08a2ae6f693ed94fd12b241 | 4 | 0 | 0 | 0 |
| 94516819bab50a71435709cd84e52357 | 4 | 0 | 0 | 0 |
| 58ba57344913746e679286f359387c63 | 4 | 0 | 0 | 0 |
| d1571f2c26c0b3e03bb4b2f449710986 | 4 | 0 | 0 | 0 |
| 528c4ae48f30123f09858ccc01f49ba5 | 4 | 0 | 0 | 0 |
| ed488794aad0eb737f657e4f074dc47b | 4 | 0 | 0 | 0 |
| 0a6b213f3fe052cbf83769da9179310b | 4 | 0 | 0 | 0 |
| 6ef333a4afd76291fb5efceddf262e9f | 4 | 0 | 0 | 0 |
| a3e9984fa36c38df0ac942b29f55d45c | 4 | 0 | 0 | 0 |
| ff09cb2507b8408841aee169bee6b9a1 | 4 | 0 | 0 | 0 |
| e96f4cec0dbb2381a07a77221b952eba | 4 | 0 | 0 | 0 |
| f2a62fbc9800faf6d8939164a51ce730 | 4 | 0 | 0 | 0 |
| 5544111adb485adfc0fd950f81c7fb7e | 4 | 0 | 0 | 0 |
| fe2df0f126e14d5c3cb6ac0f0b41d71c | 4 | 0 | 0 | 0 |
| 0a53cffc3699e562e5b9f44b9b2205c8 | 4 | 0 | 0 | 0 |
| e74835e3a02e915bcf3b9cd265d950f7 | 4 | 0 | 0 | 0 |
| ad23f89b815e03d3d94dce4136688c7f | 4 | 0 | 0 | 0 |
| 14acca9c654698697d69a42c9163e4f7 | 4 | 0 | 0 | 0 |
| 98074096e97125c90764b76a8786c2f0 | 4 | 0 | 0 | 0 |
| a7c6e3b515255f020efe9c055b841390 | 4 | 0 | 0 | 0 |
| a1be089e8bc0043647fc5303f463d714 | 4 | 0 | 0 | 0 |
| 6e0e1f5e972ca74e9fd25598edbb19aa | 4 | 0 | 0 | 0 |
| 560da97d089a94e592f5fbafd001e1da | 0 | 0 | 0 | 0 |
| 02095094f2bae0a9aac6b38e6948b9fb | 0 | 0 | 0 | 0 |
| 52a2830bd87ab5729275f82e38f7297d | 0 | 0 | 0 | 0 |
| 87d8b7733070ae114df8d1677d4a1820 | 0 | 0 | 0 | 0 |
| 3ac83278836913e4f12576653d51ee73 | 0 | 0 | 0 | 0 |
| a8896ca2cc126c844d649406cf556ccc | 0 | 0 | 0 | 0 |
| 2fd65a0cf677ca62296e81905091da0a | 0 | 0 | 0 | 0 |
| 8549b65564b3edbe3d60f80477e8100a | 0 | 0 | 0 | 0 |
| 4fe07d32e335199da6355111135c8a18 | 0 | 0 | 0 | 0 |
| d7eefb8e4de813937f5a986bd1cffab2 | 0 | 0 | 0 | 0 |
| eefc60c2bb11b1815b5df7a944ac3dbe | 0 | 0 | 0 | 0 |
| 49eb887953e10a270ebf99e48c136351 | 0 | 0 | 0 | 0 |
| 0b882f50e64c28f49a16f3162aa09528 | 0 | 0 | 0 | 0 |
| 1fd2ef01a49a55fb1ed52cb107d605ba | 0 | 0 | 0 | 0 |
| a05272f4530f9bc9832f1c94ab8dbec6 | 0 | 0 | 0 | 0 |
| ed9cabf9c6066ae9bdf2b045a33270ba | 0 | 0 | 2 | 0 |
| 012c5941487792a74b9ec016b5dc422c | 0 | 0 | 0 | 0 |
| 26bf49c6df9622c2d4f50b34337c6ab2 | 0 | 0 | 0 | 0 |

|                                   |   |   |   |   |
|-----------------------------------|---|---|---|---|
| 7868227da5290016ae967b7278b77b7d  | 0 | 0 | 0 | 0 |
| 50119b6485bf525dfb76fb40e9874e39  | 0 | 0 | 0 | 0 |
| 6103bf6ec00869d5828744a190ca5d31  | 0 | 0 | 0 | 0 |
| b384d22417e5ca8c4f79509901e75754  | 0 | 0 | 0 | 0 |
| 828f5aca22d70b70e5ebdc3ad5f6fdeb  | 0 | 0 | 0 | 0 |
| a37bc93ce66c72fa586994ec69795048  | 0 | 0 | 0 | 0 |
| 397d0f7bdcf805c9880adaf31b6fc99d  | 0 | 0 | 0 | 0 |
| 63af5e05af7b6c3c2c87a6613e094919  | 0 | 0 | 0 | 0 |
| 7edb98f16026331b2f0be3830459a27e  | 0 | 0 | 0 | 0 |
| d5175c56305d7cf0a569db3dd3680cc8  | 0 | 0 | 0 | 0 |
| bd826781430fa069e8f96ce7dfdd1b9b  | 0 | 0 | 0 | 0 |
| 1f3c575233d1a9aad4ef66dac5fe0d8d  | 0 | 0 | 0 | 0 |
| 3825fcc4c2555a3b12dd3bc220ead9ce  | 0 | 0 | 0 | 0 |
| f6e807490ae5309390c64803333d84ca  | 0 | 0 | 0 | 0 |
| 345060c90ff47dbda1d9fceeabaa49015 | 0 | 0 | 0 | 0 |
| e23f6c7bd490169afdc9d72b8cf0ed4a  | 0 | 0 | 0 | 0 |
| ebfdf2c374c3ba6a9a4705e52aa2c666  | 0 | 0 | 0 | 0 |
| 6d592ffd712dc3a5da2b5e167cf97f73  | 0 | 0 | 0 | 0 |
| af344e528c6c75ad0e503361c418c9d6  | 0 | 0 | 0 | 0 |
| 1282815496a544a75deab780d650b84f  | 0 | 0 | 0 | 0 |
| cf9d4c5fb62755974c4bf069331a7a7c  | 0 | 0 | 0 | 0 |
| 5458b394d6cb8c3ced5468be123bd88d  | 0 | 0 | 0 | 0 |
| 751e6248af81f2de91faa1b8429f4c2c  | 0 | 0 | 0 | 0 |
| 3f57a542127f68957da6f3deecd5c529  | 0 | 0 | 0 | 0 |
| 746c70048f636c698261b7a39d8a2e4d  | 0 | 0 | 0 | 0 |
| ff4d6c0a6d9fc9782fe485015b160384  | 0 | 0 | 0 | 0 |
| 61f505f9b129a3ef81aea2738b06386a  | 0 | 0 | 0 | 0 |
| 1449ac2bea9041d55856cf483d962d72  | 0 | 0 | 0 | 0 |
| 1037c61770584f0356817bbfc74681cc  | 0 | 0 | 0 | 0 |
| a3ff3d3dfa55dbb85ed5aa93279bc2c4  | 0 | 0 | 0 | 0 |
| 7db81447e1696333a5e96f88eb473987  | 0 | 0 | 0 | 0 |
| 6250f928b7950146f47b35d26e49ef84  | 0 | 0 | 0 | 0 |
| 61161fc4b9ebb0eeb62a577f976f3fdd  | 0 | 0 | 0 | 0 |
| cb89c48f2155b0683d9e0489f0a1e653  | 0 | 0 | 0 | 0 |
| f37e05978c5d0b0b4b3c19832d44f64d  | 0 | 0 | 0 | 0 |
| df9f8890b1ddd225d9957b04ebd9214b  | 0 | 0 | 0 | 0 |
| be2e16d2d04bd420494975fe1e0aeb96  | 0 | 0 | 0 | 0 |
| 8c3ec14ef7530619ef1be64fbf67a449  | 0 | 0 | 0 | 0 |
| bf11795216f2b0fbd909c99adf95187e  | 0 | 0 | 0 | 0 |
| ef5f6c0edcfb5a44d62147465b2fcf29  | 0 | 0 | 0 | 0 |
| b39f016c979f78bc5b2c152ca1c61468  | 0 | 0 | 0 | 0 |
| a48514be1c1bf097885c374dad424714  | 0 | 0 | 2 | 0 |
| 6403e4c94f282be6054268da18a2115b  | 0 | 0 | 0 | 0 |
| b71fd920ac0ac6dbb8d85827a3d8043b  | 0 | 0 | 0 | 0 |

|                                  |   |   |   |   |
|----------------------------------|---|---|---|---|
| f53080278eae3d74dbdb49fbfd5349d6 | 0 | 0 | 0 | 0 |
| 088b74f384bb0a6946b25b22c5ae4776 | 0 | 0 | 0 | 0 |
| 108ee9232862f69068e016825250f18a | 0 | 0 | 0 | 0 |
| 8135eff65019e995709c7af01942deab | 0 | 0 | 0 | 0 |
| 9f9de6fd9d8005dcd4d6d019b4eb219e | 0 | 0 | 0 | 0 |
| 01c5792637287495dcb8f4d9542d5110 | 0 | 0 | 0 | 0 |
| d8922c8ed9f9b1a0be520c4e4872e1af | 0 | 0 | 0 | 0 |
| 9aacbe687d258170c9ff436353aeafb5 | 0 | 0 | 0 | 0 |
| 224d637f72dafa34254d5d275f3ee269 | 0 | 0 | 0 | 0 |
| 21786ffe83e1285d9bdb772c14894088 | 0 | 0 | 0 | 0 |
| c489524ceb441ab19b2b8ca4846b83c3 | 0 | 0 | 0 | 0 |
| fa42c3a9e36b548b1dabc39d806f7bcd | 0 | 0 | 0 | 0 |
| a8a0ce70a0a88417a6bd7ce5ea31bb91 | 0 | 0 | 0 | 0 |
| c16c226ea11c1656cd6583dac7cc0675 | 0 | 0 | 0 | 0 |
| e53a4c59ee27e7c8756f63c9526f9c67 | 0 | 0 | 0 | 0 |
| 663fa40b42a6f07158eb31b082c3fb49 | 0 | 0 | 0 | 0 |
| 51608618a4227919d2849f4ec77048ae | 0 | 0 | 0 | 0 |
| 7941f4ece70f74dd097425e76ef854b7 | 0 | 0 | 0 | 0 |
| 9ac9d5ff941e3c31197dd057d2e366ec | 0 | 0 | 0 | 0 |
| f2ac915a68e928d08ff0a1262515b959 | 0 | 0 | 0 | 0 |
| 3161d42b4ef9aaaa461053f6ff5118b9 | 0 | 0 | 0 | 0 |
| 1ef695b4080b2327006e4290dc5a2a65 | 0 | 0 | 0 | 0 |
| 095c1b800e2f34af03f1f3fb019944d6 | 0 | 0 | 0 | 0 |
| edc454869545471beb8c1238d13a7485 | 0 | 0 | 0 | 0 |
| 677511329e473a307f143699dd560128 | 0 | 0 | 0 | 0 |
| 31b2dc6c3b5b23332c824c3aba16728d | 0 | 0 | 0 | 0 |
| 4b6515eb9fcd389cdc271adc3ac323b2 | 0 | 0 | 0 | 0 |
| 7c74657e3f5196280a7416dcce4c498a | 0 | 0 | 0 | 0 |
| 38991e03098fbd315b2c900dc168c18b | 0 | 0 | 0 | 0 |
| 8c66ab5a675c0ad1ff2018e498ee8b7f | 0 | 0 | 0 | 0 |
| 9acea3090139755e54712fd7251e726d | 0 | 0 | 0 | 0 |
| 4c698c46054709979f3c5f35d734463b | 0 | 0 | 0 | 0 |
| a7306bce3c083315a452aadd2299bb55 | 0 | 0 | 0 | 0 |
| 4c1513a5801e2a0a030f2af894b7f35f | 0 | 0 | 0 | 0 |
| f2fd7f7c28f3725cdd0c5704776249f1 | 0 | 0 | 0 | 0 |
| 36484fbdd8567741404dd8aa9d8f3ffc | 0 | 0 | 0 | 0 |
| 2be9bd8205052313e35666e8dc82bf02 | 0 | 0 | 0 | 0 |
| daa54f81a0cbf3309ba3feb3f6370988 | 0 | 0 | 0 | 0 |
| db1abda21dcb50402a9ecea5d2b258ff | 0 | 0 | 2 | 0 |
| b341c252eb0d6d7932c22f05ad08c55c | 0 | 0 | 0 | 0 |
| 8fef38b4c46edda11e2512e40c44bfad | 0 | 0 | 0 | 0 |
| bf5b85203487107c15776921acb6722c | 0 | 0 | 0 | 0 |
| fb5e1c2eaa51ae39f3ad78cef00e86be | 0 | 0 | 0 | 0 |
| d729502f286a2351f3c11d299edf12a6 | 0 | 0 | 0 | 0 |

|                                  |   |   |   |   |
|----------------------------------|---|---|---|---|
| 5029568bb0de537e6eae73844ff6dc0c | 0 | 0 | 0 | 0 |
| 1fed9795bc844f58c5c4da6214886357 | 0 | 0 | 0 | 0 |
| 7d0a6af7a0e8452fa59938a373a1dbd2 | 0 | 0 | 0 | 0 |
| 975d015551d212c90c5dcf6efcf8c8cf | 0 | 0 | 0 | 0 |
| ae51f3987d45d8febc163994c6958f9f | 0 | 0 | 0 | 0 |
| ed9d32fbfeb4d9561d221fc05b9de177 | 0 | 0 | 0 | 0 |
| 5ec6f9eda4ca435fb4edb4aa9bb86627 | 0 | 0 | 0 | 0 |
| 7a1075159f3914e35c7b57ffa498071b | 0 | 0 | 0 | 0 |
| 838c39ea895cf5c9849d0978d6e23003 | 0 | 0 | 0 | 0 |
| eb61210668df80184d70f79ac8f05d65 | 0 | 0 | 0 | 0 |
| 0a354d4c92a222cc02bc70f339e3ddce | 0 | 0 | 0 | 0 |
| 564ed086e8203ab3369e2d36ae571c04 | 0 | 0 | 0 | 0 |
| 27421dd9ec966841fcb6080809f1b21c | 0 | 0 | 0 | 0 |
| 99b64e70b2e4c602c65fcc8561e60bce | 0 | 0 | 0 | 0 |
| 7ba1d410b4db9247a94fe39b07d7728e | 0 | 0 | 0 | 0 |
| 8d451736fcf3b7e2a79987be2dc20be4 | 0 | 0 | 0 | 0 |
| 92d1b251d7c5660883128923cddcb36a | 0 | 0 | 0 | 0 |
| f5510dcb566a3f43c9edaf96d895b026 | 0 | 0 | 0 | 0 |
| 3ca6ec319d60bd3738ae606a7425ca07 | 0 | 2 | 0 | 0 |
| 20ee4af3239da570d704c3c007f935fb | 0 | 0 | 0 | 0 |
| 3fa5e8075bd765f725a89e1289e18503 | 0 | 0 | 0 | 0 |
| 228779d09a7958a80b0b74413a1f25c2 | 0 | 0 | 0 | 0 |
| 6d38fd633ed57109dac4f009ace0b71d | 0 | 0 | 0 | 0 |
| 9b7e0f0b54f02bb81c2c1feaa139079b | 0 | 0 | 0 | 2 |
| 98d583fed02e34738cc025ca82b3a39d | 0 | 0 | 0 | 0 |
| bba929fe304fa4129a32b2ad11f8618a | 0 | 0 | 0 | 0 |
| 566ca18d9adc710d6d1e74ef42cf2c90 | 0 | 0 | 0 | 0 |
| 026e90b56b2e92d3c4a67b0cff0ed40a | 0 | 0 | 0 | 0 |
| 383f08eb753d50ab6f036b52631561c1 | 0 | 0 | 0 | 0 |
| a2ce99bc86d0e6bbad9dbebe7fd328a2 | 0 | 0 | 0 | 0 |
| b4fd9985fc0ad319f9ba2fdf39cf6b44 | 0 | 0 | 0 | 0 |
| 86525f3118fcbb7baab82b4a78e9a89b | 0 | 0 | 0 | 0 |
| 0d2265e859e42a89c22957085ffd9c69 | 0 | 0 | 0 | 0 |
| 3c2934680d564f24be3099a620adb243 | 0 | 0 | 0 | 0 |
| f7d25df1e24d28752ae01d6f86af5ff2 | 0 | 0 | 0 | 0 |
| a893c86550d90106fb1e80c2af9f99b8 | 0 | 0 | 0 | 0 |
| 2303bd050891b7aacc001e01781b9a1c | 0 | 0 | 2 | 0 |
| 91eef6954275f002788e63385a45e186 | 0 | 0 | 0 | 0 |
| ff638d80ee5d34e5b6164175f790b166 | 0 | 0 | 0 | 0 |
| ce323be514721138b35fc237de2f7ac1 | 0 | 0 | 0 | 0 |
| 189953ebc44cc72b90d49070a5cc5b45 | 0 | 0 | 0 | 0 |
| 0ad8aac325ac04abe45b1caec44c5f   | 0 | 0 | 0 | 0 |
| 9922e9f232be1a14f7057f28c65214d1 | 0 | 0 | 0 | 0 |
| 6bdcf37bb3b4584e729edc355d81d33c | 0 | 0 | 0 | 0 |

|                                  |   |   |   |   |
|----------------------------------|---|---|---|---|
| d9fe1a70d2660afecafb499d36f3cbef | 0 | 0 | 0 | 0 |
| 39f42375dd3c9c0eeaf052ab9d0687ac | 0 | 0 | 0 | 0 |
| 5af9188ee0503a1682bd39ebf3fad1a7 | 0 | 0 | 0 | 0 |
| aa310134ad8b2e5584cd0ed6a155dd33 | 0 | 0 | 0 | 0 |
| 43189e05ac474b884c0397858f9bc34d | 0 | 0 | 0 | 0 |
| 0f32b566e184469a7334fa2501bea50a | 0 | 0 | 0 | 0 |
| b31ae80834a5793e83ce94853878f6df | 0 | 0 | 0 | 0 |
| 474f4e0f7a31f2d1af0d2c8d1349c779 | 0 | 0 | 0 | 0 |
| 6959e7a0f6d6135fec089089e81a842f | 0 | 0 | 0 | 0 |
| 5ea4ddd5e275d50204647e21b13cad6f | 0 | 0 | 0 | 0 |
| ac2d64e935d2270ceb263bab2960c435 | 0 | 0 | 0 | 0 |
| 8eb18acde502170daa6e52719b09338e | 0 | 0 | 0 | 0 |
| 41e8c7f7216c73e4eb87699b902c7e15 | 0 | 0 | 0 | 0 |
| f010e8404227e34e72cdec8d5cdd069a | 0 | 0 | 0 | 0 |
| 5c0964f7764aba2fd419d8f1f18c797b | 0 | 0 | 0 | 0 |
| 69cc94369daf95a49c7f3dbbd6338485 | 0 | 0 | 0 | 0 |
| 290c39c4be9867ddf902f61196c8c8be | 0 | 0 | 0 | 0 |
| 08f5b8ad434c97d34e8a105ae370a29e | 0 | 0 | 0 | 0 |
| 14a8f73fa624c36f59682c7f92dc8537 | 0 | 0 | 0 | 0 |
| 2ec907809d7220a5b21bb4f75298c84b | 0 | 0 | 0 | 0 |
| 7204b61fde6be7630b0facbff03d09df | 0 | 0 | 0 | 0 |
| 9a640acb5c2c66c1117535345e61c312 | 0 | 0 | 0 | 0 |
| 0da7b963871b94aa8272d487349b63d7 | 0 | 0 | 0 | 0 |
| b997e2e8ab11255c8b9c93b2df4a8af3 | 0 | 0 | 0 | 0 |
| c753f89afdba79075e5c7677881d44b8 | 0 | 0 | 0 | 0 |
| ac31ce756c4b4a9b0ae691a40cf3816e | 0 | 0 | 0 | 2 |
| cbb567a4a14898f6f50668405dfcd249 | 0 | 0 | 0 | 0 |
| e8f1be3dee222233c8387d9eec48dae2 | 0 | 0 | 0 | 0 |
| a83a9c00794beb6119bdc0677d6727b6 | 0 | 0 | 0 | 0 |
| 049181802a231a4e52be5921eb9fe047 | 0 | 0 | 0 | 0 |
| f2b69e7fab00b9307e54d43341cd9f10 | 0 | 0 | 0 | 0 |
| 98bc05fba97438c4284ad78b28736d11 | 0 | 0 | 0 | 0 |
| e3041a0fdfd52513ad6061e69061af9f | 0 | 0 | 0 | 0 |
| 0e3b5888a080ae493768e5b0a395de81 | 0 | 0 | 0 | 0 |
| 9bbf6b6c86b769e6d51c5121aa98a776 | 0 | 0 | 0 | 0 |
| a93908c1d469302a01e2e30fb9d0ad32 | 0 | 4 | 0 | 0 |
| ac14a87d93a3305b5867be59df5325ea | 0 | 4 | 0 | 0 |
| 03b234ae9ffa1ff3f6bf5cbcb0ada27  | 0 | 4 | 0 | 0 |
| b4bf117e3426d79230deea670bb8015f | 0 | 4 | 0 | 0 |
| 3923e0dbef057f5adec8688f6e6d7995 | 0 | 4 | 0 | 0 |
| c49a3b620998b67cd57b30a23f6e3f79 | 0 | 4 | 0 | 0 |
| aeaf2be140eb289dbf7b2b7df71f4d59 | 0 | 4 | 0 | 0 |
| 9a3e584bb0ab6181f6fe0926233aea8b | 0 | 4 | 0 | 0 |
| 3e9cdb7e0c447e896de01586b6329dd9 | 0 | 4 | 0 | 0 |

|                                  |   |   |   |   |
|----------------------------------|---|---|---|---|
| 8f7d7babb583f66d9a133546419c19e6 | 0 | 4 | 0 | 0 |
| 9328dfadfea23a004d110f1e50ccec14 | 0 | 4 | 0 | 0 |
| dc6e586c618ddb517f0a38b9668137d2 | 0 | 4 | 0 | 0 |
| 0cbcd88d284a43629a8ecc5f94af5d79 | 0 | 4 | 0 | 0 |
| b0fc5ac9acd5feb731d8dbc0149c9cbb | 0 | 4 | 0 | 0 |
| acefbcb2bd5f040136d942799bdd9bf4 | 0 | 4 | 0 | 0 |
| 647049fd020d7a3c14dc0705a81fafd1 | 0 | 4 | 0 | 0 |
| 9a86cf06c7570d2f6271092b814cf21b | 0 | 4 | 0 | 0 |
| 06f681c99484d4119e6e4dd31e28b8d4 | 0 | 4 | 0 | 0 |
| 91d5e69c7727204b94fabab6c958795c | 0 | 4 | 0 | 0 |
| 755594188dde30ea2863d623a481607c | 0 | 4 | 0 | 0 |
| 8ea1b2d2b5cf2d5d7d9b8e5999b37720 | 0 | 4 | 0 | 0 |
| 6c8955aecac61695d4b130f42a3ac884 | 0 | 4 | 0 | 0 |
| cb2d2a79ede9660c70ec665f23ba86ed | 0 | 4 | 0 | 0 |
| 9b9c440f7b97fd53cf258c656263d19f | 0 | 4 | 0 | 0 |
| f673e0e23a55012a79b5c3bbe0f33135 | 0 | 4 | 0 | 0 |
| 3b5821d13eb950b28aa3e72c30039147 | 0 | 4 | 0 | 0 |
| 66fc8d1f93635dd78a045dbb9615cccb | 0 | 4 | 0 | 0 |
| 869ac7db6068a59aa300bde8b8b05946 | 0 | 4 | 0 | 0 |
| 7659b2f8e2a3c9998dc48702d6937a31 | 0 | 4 | 0 | 0 |
| d540432d4d2069ff46c45150bf59a6a2 | 0 | 4 | 0 | 0 |
| 45bfb82d590229aca00b656f775cd444 | 0 | 4 | 0 | 0 |
| 94b816058a961041dc87a3e43aa7f5c9 | 0 | 4 | 0 | 0 |
| e1a9fbaba29ab0f2a2ed3810b4bf1ba2 | 0 | 4 | 0 | 0 |
| 372a956cb238503d78b50a2f3d88ef11 | 0 | 4 | 0 | 0 |
| dc5ebcbaea9d4952aa48ada25daf2102 | 0 | 4 | 0 | 0 |
| c9ac28a31a7cd64374477d1515dbf3f6 | 0 | 4 | 0 | 0 |
| 0b46b9731670246e48e7b7a5ccf2e58e | 0 | 4 | 0 | 0 |
| d5361cc0fe12be4a9f091a5879bd21aa | 0 | 4 | 0 | 0 |
| 0680b535d42c490b1649a5da89e43882 | 0 | 4 | 0 | 0 |
| eeb754e42506c94da4fe4a9522cfe4b8 | 0 | 4 | 0 | 0 |
| 557e4e15ae07cda28084627eefaeaa6d | 0 | 4 | 0 | 0 |
| d6a0395b265a4d54fdc09072f21c2fc8 | 0 | 4 | 0 | 0 |
| be26f0032c4621b32786d98fbfa4a9b5 | 0 | 4 | 0 | 0 |
| c39b7e4015db48e753fc870d549a680a | 0 | 4 | 0 | 0 |
| 74c0701d118c1761510f33facb8d5e40 | 0 | 4 | 0 | 0 |
| f03c48fcfeb776dfedffee911c794e5  | 0 | 4 | 0 | 0 |
| 14467a49abf4ef225384916b487e39e6 | 0 | 4 | 0 | 0 |
| b64f30e0d5f14a453fab649f49d4441b | 0 | 4 | 0 | 0 |
| 6c0052b3c7aa7a93847d607c8d71c5ad | 0 | 4 | 0 | 0 |
| 4a87d468162ed7c048d0f71273ac1919 | 0 | 4 | 0 | 0 |
| baf2627ae58370a4ae0371712f9f064b | 0 | 4 | 0 | 0 |
| 1b1728da4afd740dd61a041b90eb0962 | 0 | 4 | 0 | 0 |
| a6297b14ae5578534340d8ac62093418 | 0 | 4 | 0 | 0 |

|                                  |   |   |   |   |
|----------------------------------|---|---|---|---|
| 1990f41878e3e0794051e9c9c43229d9 | 0 | 4 | 0 | 0 |
| 394d8cb82c87b64a3d9d81300e1aafdf | 0 | 4 | 0 | 0 |
| ad0f7b1f5b0dd3beb5bf5d275d46ba30 | 0 | 4 | 0 | 0 |
| 7163bff70e1d257b11e4cf649e211373 | 0 | 4 | 0 | 0 |
| 328a522c91eb874c24a26cc172905b99 | 0 | 4 | 0 | 0 |
| dce00a126935419d5b5a2b2cbddc5d99 | 0 | 4 | 0 | 0 |
| cce70e8b6cc4fe1ffeb0b02d7ebbc43e | 0 | 4 | 0 | 0 |
| 25b9360fc64f1ea9f67eb12f23b78696 | 0 | 4 | 0 | 0 |
| 8e5ced4c3204b6382a0f1e98168fda05 | 0 | 4 | 0 | 0 |
| 4f83c6424d08a97d2d4db3c4a95a66d4 | 0 | 4 | 0 | 0 |
| 1d8ac0ec03e2e4f7b7d1f2b0f6508013 | 0 | 4 | 0 | 0 |
| 4f481f454a2e8bf896d06760eb9b7ba2 | 0 | 4 | 0 | 0 |
| f3782ff2b0ba2c90e47f42c46e7ff846 | 0 | 4 | 0 | 0 |
| 4f1f12cf5e2118114ef4ab008a0c688e | 0 | 4 | 0 | 0 |
| 9d0b2bcfdd9940404d4a4848c7376c4f | 0 | 4 | 0 | 0 |
| 9c34ed8f7471f84f903a00e3e93e3be8 | 0 | 4 | 0 | 0 |
| 55ace7caf300432edb483fdableac78f | 0 | 4 | 0 | 0 |
| fc717dfd06ba767e99312a9f1b040ebe | 0 | 4 | 0 | 0 |
| 993f4882a157f5337a9d3b7d6c4e0cb0 | 0 | 4 | 0 | 0 |
| 8e897cd62386e7641074dde839c8767a | 0 | 4 | 0 | 0 |
| 4c7e7a6da1b9eeabc063034930330f2e | 0 | 4 | 0 | 0 |
| 9a4bb3b6ee07e7c6e32ca3697e246350 | 0 | 4 | 0 | 0 |
| 56135988442d6d66cc909763d4781b05 | 0 | 4 | 0 | 0 |
| 3ce077930d945faa79012709cc9f4e1a | 0 | 4 | 0 | 0 |
| 63cbb47ed20d4b87d2589e66b27ecd57 | 0 | 4 | 0 | 0 |
| 06f8b2e99c395862180c493c82e2db19 | 0 | 4 | 0 | 0 |
| d405902c3628b35672a2e422212af0ff | 0 | 4 | 0 | 0 |
| bfae9d59ac82e2fc24f7feaffac5d637 | 0 | 4 | 0 | 0 |
| 72e19b0f80d3234184ad57000264cdbe | 0 | 4 | 0 | 0 |
| 7d9ae151f67cd13b12ecc96f53e9bf53 | 0 | 4 | 0 | 0 |
| 0cac2c4a19e4133e8b1e45b2191c2853 | 0 | 4 | 0 | 0 |
| 6d05539669340905cdbac390101d67c8 | 0 | 4 | 0 | 0 |
| 62f2c82dbbe6e80640c4508556feb97a | 0 | 4 | 0 | 0 |
| dfa1031ad04a63c2979e7bd81c1e5594 | 0 | 4 | 0 | 0 |
| b5db8dc182d48ccf55269344c82f3b2e | 0 | 4 | 0 | 0 |
| 1fb794a48d634286a192efe45ab43ef7 | 0 | 4 | 0 | 0 |
| fcfedcc9844fe2e4a9732a17901f8f6f | 0 | 4 | 0 | 0 |
| e057f87372ee4a35c4f446c65a779f31 | 0 | 4 | 0 | 0 |
| aa05ce329678f43a71ab5b005078a175 | 0 | 4 | 0 | 0 |
| 5d9dd1073aaf76133d1e00ed60554ca0 | 0 | 4 | 0 | 0 |
| e6d2d6496f1025540bcce45990e43fa2 | 0 | 4 | 0 | 0 |
| a5add41ad8096920867c2ac0b7876bf6 | 0 | 4 | 0 | 0 |
| 254133074dba8150b646fe6ee126f269 | 0 | 4 | 0 | 0 |
| 29763c58a50360cd8351798a842f86bb | 0 | 4 | 0 | 0 |

|                                  |   |   |   |   |
|----------------------------------|---|---|---|---|
| 8397705d4e640251fa2d314ea9413d12 | 0 | 4 | 0 | 0 |
| 4e2e774748ccbb6d099b59112aa6ebab | 0 | 4 | 0 | 0 |
| 46b1f4b36cd98e7532f35cebcba233e3 | 0 | 4 | 0 | 0 |
| fe6400eae2c38e18ffac00f277c9a694 | 0 | 4 | 0 | 0 |
| 2a1c4ba4843e6ef28fb1afa6377d9ce0 | 0 | 4 | 0 | 0 |
| a2527fc3e2eb6a32b4d28acf5725b15d | 0 | 4 | 0 | 0 |
| bfa38e506a26f84677807479440c39f2 | 0 | 4 | 0 | 0 |
| 8d044e558b4c7840db6b923646008766 | 0 | 4 | 0 | 0 |
| e3e79e0bfd8606bbc266b0895931850e | 0 | 4 | 0 | 0 |
| 23cf5c73f6e7d43ba544a22f269d8fb1 | 0 | 4 | 0 | 0 |
| 0667a0c74e3348f9103c27603015e961 | 0 | 4 | 0 | 0 |
| 46985ccf7da1e8a63acc5ebcb0f68924 | 0 | 4 | 0 | 0 |
| b472cd9efb973bf2eb44c7738ed9e181 | 0 | 4 | 0 | 0 |
| 56403bc4d0f29c88e1a608149a24a4ee | 0 | 4 | 0 | 0 |
| 62b200ea0f757c0469fa8dbbc7941134 | 0 | 4 | 0 | 0 |
| 3441f078e84e0e472f11d23797e05138 | 0 | 4 | 0 | 0 |
| f462697b25e0d68d8467c6fa8f625bfa | 0 | 4 | 0 | 0 |
| dd38bead8412381f18a477b1cc9782d9 | 0 | 4 | 0 | 0 |
| 759bb60bbea32964d08796f32a18380f | 0 | 4 | 0 | 0 |
| 7d6053b84924e8b3d3a779c4402090e2 | 0 | 4 | 0 | 0 |
| 0de1bd8bb4e2034370829665ff3e607c | 0 | 4 | 0 | 0 |
| 657f0a800669238bb7fc3bf69a670f60 | 0 | 4 | 0 | 0 |
| e02f8d89d897ed634fc12cf71bf03a77 | 0 | 4 | 0 | 0 |
| 6e4a4ba1e2f79b72dc7550982bb7064b | 0 | 4 | 0 | 0 |
| 50e6dbdbc126632b4abb34803d5c4d52 | 0 | 4 | 0 | 0 |
| 0fe742c551dc8e3dbd0c9afc7b1bef95 | 0 | 4 | 0 | 0 |
| b055d667e1ad72dbfec4ceecc6a42a6b | 0 | 4 | 0 | 0 |
| 3d94717e2901cd01c3f04a987aab7063 | 0 | 4 | 0 | 0 |
| dec37d33165a1b74123f46d887a90032 | 0 | 4 | 0 | 0 |
| a24e3c67eb83f288bd4649be8fc02114 | 0 | 4 | 0 | 0 |
| c6bb356e7a2960a5691300aa667f5a10 | 0 | 4 | 0 | 0 |
| 5ef7c4b6d099244ac2c21c5ef3faea64 | 0 | 4 | 0 | 0 |
| d5d08cc135087514153a71ec3cdab859 | 0 | 4 | 0 | 0 |
| 4112a63ead989bbb91f2f1149f33bf60 | 0 | 4 | 0 | 0 |
| d6a3da9ed5da566585ef4fe3c916547c | 0 | 4 | 0 | 0 |
| dc103e9961de0458ad65ea102f5af183 | 0 | 4 | 0 | 0 |
| 7ab77ac92cd878a7deaf9886e468c6c8 | 0 | 4 | 0 | 0 |
| 35e2aabcaccf705481c612e159d68050 | 0 | 4 | 0 | 0 |
| 3b33e6c0a4a02c145191610f693d10e1 | 0 | 4 | 0 | 0 |
| e2bbd4c03054c78325bf6a18b8933abc | 0 | 4 | 0 | 0 |
| ba9526f4cd21623558ea1dc925e371b1 | 0 | 2 | 2 | 0 |
| c3a2d78d10c6c177fed8761340979c29 | 0 | 4 | 0 | 0 |
| 1efa1871fb18012ce1524bfed6ba25c5 | 0 | 4 | 0 | 0 |
| d9d29f84050268a2e6360e3eed6acd71 | 0 | 2 | 2 | 0 |



|                                  |   |   |   |   |
|----------------------------------|---|---|---|---|
| 9488ed056b4047745006d0cb44a810c9 | 0 | 4 | 0 | 0 |
| 2e8615ed2b0ce0c8046d7705b19e04ff | 0 | 4 | 0 | 0 |
| cace9a8ed83bf4461bc28588008d8443 | 0 | 4 | 0 | 0 |
| b9ceaa3425d71d44656b4035a8558b00 | 0 | 4 | 0 | 0 |
| 04960f2cfc90762db56c9347ba98014e | 0 | 4 | 0 | 0 |
| 431573aecc43483bf1c3d8b4e0bf6a86 | 0 | 4 | 0 | 0 |
| fcc73b96b8893609d3a47869e2b26f88 | 0 | 4 | 0 | 0 |
| 0246c07ced91cb25c861fc28c2a42f68 | 0 | 4 | 0 | 0 |
| 988bd6e97de40494adda5f2c46c67293 | 0 | 4 | 0 | 0 |
| f18ef0400ccb3f8815001744e55c0517 | 0 | 2 | 2 | 0 |
| 883f60cd8c68e0259bd4749b0293d418 | 0 | 4 | 0 | 0 |
| 42128247624d92c49c4a41ba6e461881 | 0 | 4 | 0 | 0 |
| f141abd84ad8ca0ddd04e82e57bddd14 | 0 | 4 | 0 | 0 |
| 66291daaca1166a51190d118e8f60f7a | 0 | 4 | 0 | 0 |
| 2f37e1b9629cb0d22b7d6133b081a01b | 0 | 4 | 0 | 0 |
| f20cedcea1baa16f46d42c996d845e69 | 0 | 4 | 0 | 0 |
| 06dcc725e8c9944e59cd918040a9a2b2 | 0 | 4 | 0 | 0 |
| 0b3f7fd81b1bbdd42bb8173f54b1ae6b | 0 | 4 | 0 | 0 |
| dc8bdabdc2ea87ef47d2146369871a16 | 0 | 4 | 0 | 0 |
| 2bffaa7ee6cdc836592e9a23146fb03e | 0 | 4 | 0 | 0 |
| e7abb440e2f2d78c87155b4076b1a414 | 0 | 4 | 0 | 0 |
| 75d76a334df62ed728fdcdf3388960f1 | 0 | 4 | 0 | 0 |
| 920121e7966ae465ae903115305fa607 | 0 | 4 | 0 | 0 |
| 21919c7e616828c397eb05368b4d84f6 | 0 | 4 | 0 | 0 |
| ebb95f572a1752f0b4f817f4a2a58a2e | 0 | 4 | 0 | 0 |
| 09c779971aee833cbd31e10a93202e43 | 0 | 4 | 0 | 0 |
| a6440055db53bc65c65638a36febd8e3 | 0 | 4 | 0 | 0 |
| b05977f9d97931b7e8dc44f0898c35e4 | 0 | 4 | 0 | 0 |
| 863e6e8da6dfd7f5bcb018fdca2028f5 | 0 | 4 | 0 | 0 |
| f9add6ae443eab8b455b32a59860e4f5 | 0 | 4 | 0 | 0 |
| 6114401084d2aba98e711a52dfa68bee | 0 | 4 | 0 | 0 |
| f391a25d74ff19573d7eaf8a93a4ca76 | 0 | 4 | 0 | 0 |
| 639025a5cd788b1360fbdd893bf40d41 | 0 | 4 | 0 | 0 |
| 6765eb2bde0d443eeaae39b561bf95ca | 0 | 0 | 0 | 4 |
| 0f270466db8b28acd711d6b650a1f190 | 0 | 0 | 0 | 4 |
| 917096d60c8d9d31fce3baf827322a6b | 0 | 0 | 0 | 4 |
| 21ee737051f36efbf1498a0cf553c7a9 | 0 | 0 | 0 | 4 |
| e8af83d2b46574f0eae298b2682eeff3 | 0 | 0 | 0 | 4 |
| bcc5c62f3b65426509eea12328ef7101 | 0 | 0 | 0 | 4 |
| d2c166272f05beb8667b40b216e3f7e7 | 0 | 0 | 0 | 4 |
| e699f45c239cdb82b393962f0817dcca | 0 | 0 | 0 | 4 |
| d3ccec4f891fd3e853462b319a9b5a25 | 0 | 0 | 0 | 4 |
| 728f034f6ca94340c80071d1a0fd172a | 0 | 0 | 0 | 4 |
| 3c09cce48838e3a67e51fbdccd6eb397 | 0 | 0 | 0 | 4 |

|                                  |   |   |   |   |
|----------------------------------|---|---|---|---|
| 468e97049a704772d413203061eb65a2 | 0 | 0 | 0 | 4 |
| ed88031276b661bb35b089a36a6cbcf5 | 0 | 0 | 0 | 4 |
| eda90d5bf33c42df3a3bf338f316f0d4 | 0 | 0 | 0 | 4 |
| cf75f65ab0af19bf89f03307d1c5f0c1 | 0 | 0 | 0 | 4 |
| 69f83d66b1d3c95ab7e7fb666f6cb3a9 | 0 | 0 | 0 | 4 |
| 70bfebfd645a93d71716ed32889ea058 | 0 | 0 | 0 | 4 |
| 211ca4ba99c6d795c229ab0b05812ac8 | 0 | 0 | 0 | 4 |
| db3edecc45a466344312599b7036a3cd | 0 | 0 | 0 | 4 |
| 4b296a51fc2d2e099309e05ebb261be7 | 0 | 0 | 0 | 4 |
| 072ee68a2a59953f562a42e342b41259 | 0 | 0 | 0 | 4 |
| 12312bd57848f1b329ce6f3c1c80aa61 | 0 | 0 | 0 | 4 |
| 1e6174b93056e98edb48c437adf64f38 | 0 | 0 | 0 | 4 |
| b506a2ae46e8f7db3c8b6a78f9b0637b | 0 | 0 | 0 | 4 |
| 4bb916c36bb217527d792b96d2c605ed | 0 | 0 | 0 | 4 |
| 47b2bb146b86888c48373b8100d7b2c1 | 0 | 0 | 0 | 4 |
| 398e09440b9fb6d0941d32a0c5c9d537 | 0 | 0 | 0 | 4 |
| 089a3d4dd2a64b1ec81ab4e8618430dd | 0 | 0 | 0 | 4 |
| 8f5dbd213068a6905d11210028f4b787 | 0 | 0 | 0 | 4 |
| 348a65a8542c44e34fba2d574c25b500 | 0 | 0 | 0 | 4 |
| 66d89f6a0e261c7503ea5cf9001275fe | 0 | 0 | 0 | 4 |
| 49ed92d119e276e05b780de1d3a581b0 | 0 | 0 | 0 | 4 |
| 0b181a662216ddf50e0fdd9b297d865e | 0 | 0 | 0 | 4 |
| 5b38cfd8bf46b4ce2560cbe264d276db | 0 | 0 | 0 | 4 |
| e897316699d039b4070cec4455402e1b | 0 | 0 | 0 | 4 |
| 85eb41f7c3f1ae3965739cd94cbd6cbf | 0 | 0 | 0 | 4 |
| c32b8458f28ee409cdb489539e9fc6df | 0 | 0 | 0 | 4 |
| 085f22264550fdd50df1efe3f7f0eba2 | 0 | 0 | 0 | 4 |
| a373018542819d26a917713e6984dedd | 0 | 0 | 0 | 4 |
| accc8934ee7fc7ad56e68388df095e5b | 0 | 0 | 0 | 4 |
| 01780d13c9e8f4aaaced99823da10f64 | 0 | 0 | 0 | 4 |
| e9696a95267ef19a935e2f5c4ea5c402 | 0 | 0 | 0 | 4 |
| d1687c49f069fff4d7cb96954c335362 | 0 | 0 | 0 | 4 |
| 3d7048e3a7ab20f18026cc18bc0b7cde | 0 | 0 | 0 | 4 |
| 63d634ec43a8d241c7a978c38d1f0455 | 0 | 0 | 0 | 4 |
| 56edf025c204734173933097e9f5383d | 0 | 0 | 0 | 4 |
| 47141bc054496561fc7b5d53419a6a62 | 0 | 0 | 0 | 4 |
| 5477ad17368afe9b2e3f15a262b120c9 | 0 | 0 | 0 | 4 |
| 6a7813e757466c22a02a5b3061ad8a1f | 0 | 0 | 0 | 4 |
| 6b206657d98187bc7292bb694c5a57b4 | 0 | 0 | 0 | 4 |
| 4b665bf5d15ff13c97a03abfed2b75a7 | 0 | 0 | 0 | 4 |
| 71778c77b2a5a04dcf1aba9b7549bc53 | 0 | 0 | 0 | 4 |
| b265fa2f6ac88a778682e18e31683bbd | 0 | 0 | 0 | 4 |
| 1d2d7b09d32f40634621e23b3c15e226 | 0 | 0 | 0 | 4 |
| 054af6b0b8c22183cc7a7f07edbb810e | 0 | 0 | 0 | 4 |

|                                  |   |   |   |   |
|----------------------------------|---|---|---|---|
| 1e05dc903a4313d7c842ca553e45eef9 | 0 | 0 | 0 | 4 |
| 961dea7ed24ffe372bc6e49e68103219 | 0 | 0 | 0 | 4 |
| 9900fc3dfb32744642a151705544ff57 | 0 | 0 | 0 | 4 |
| 67aa0b95c61161c08ce5c481cd1099cb | 0 | 0 | 0 | 4 |
| 7a6c4d7710eeeb893a7543cfa9d2ecf1 | 0 | 0 | 0 | 4 |
| 269e369123982f9655b0ce990a4e1c71 | 0 | 0 | 0 | 4 |
| c40e59895242b2c25c71f35082dafc8e | 0 | 0 | 0 | 4 |
| e2f706f948e8fdbf00e0df45ba74dae0 | 0 | 0 | 0 | 4 |
| b8f9197fa8434b7ebf747ab096a10fe8 | 0 | 0 | 0 | 4 |
| f62a1addf9565f5033c7a43e3598d3d9 | 0 | 0 | 0 | 4 |
| 34b22bdb9f0e6539b87927f215927b88 | 0 | 0 | 0 | 4 |
| 34ea54ed1decce08db9bbea9fd8c1580 | 0 | 0 | 0 | 4 |
| 467971e06d8b3f57802acdb74e5f9405 | 0 | 0 | 0 | 4 |
| 87a4ecc145bd35741f82001efda3a2cd | 0 | 0 | 0 | 4 |
| 077e3beb5100c520817f410fd7a5a82a | 0 | 0 | 0 | 4 |
| 9eb61d5b033c383a0e9b4ffa83443722 | 0 | 0 | 0 | 4 |
| 5187f73bfa043eca64f8815c4c016d1b | 0 | 0 | 0 | 4 |
| fd0ba89105c12e79bd5dd3e2cd61b781 | 0 | 0 | 0 | 4 |
| ced49a699cfd18132d5ea5e743e7c1a9 | 0 | 0 | 0 | 4 |
| 1d2f89951c3547d36238967e609e0bd9 | 0 | 0 | 0 | 4 |
| 4fc76988b357419cbe120b9ef961b6d2 | 0 | 0 | 0 | 4 |
| 972c7eccadc004bb1d585d3aa9be19f9 | 0 | 0 | 0 | 4 |
| bc43199006497590247694a93530fe36 | 0 | 0 | 0 | 4 |
| 18e3e5c404096e8cdc01d7802d094442 | 0 | 0 | 0 | 4 |
| a09f78d3748ed439276eb9b257a6bdb9 | 0 | 0 | 0 | 4 |
| 2882f58914569d2675bdad2318c7291a | 0 | 0 | 0 | 4 |
| 862a20f573b35bfc44bc7529fdb1f91c | 0 | 0 | 0 | 4 |
| 0dfa9ad7d0518e3050e228c9d2405892 | 0 | 0 | 0 | 4 |
| b7aab45dc0f236aa209fe53c3b2423c8 | 0 | 0 | 2 | 2 |
| cc91cc4bddb4f671d46e37e786d3ec4e | 0 | 0 | 0 | 4 |
| 614e2f77016bbcbfa091f3fbb9085e99 | 0 | 0 | 0 | 4 |
| eba8a5eccde912123baba0e2f80ed751 | 0 | 0 | 0 | 4 |
| b62e2b5c4d819a698d872052eabb02a7 | 0 | 0 | 0 | 4 |
| 6e406f42c011a71380364b5fb382c9e1 | 0 | 0 | 0 | 4 |
| d71f773fddea72a100e66fff3144c8b2 | 0 | 0 | 0 | 4 |
| 8be0d5e40e2ba12a89006c42f19d7ff5 | 0 | 0 | 0 | 4 |
| 9a5c7cf2633dbeac23a048573be93990 | 0 | 0 | 0 | 4 |
| caf3d88459af6114b6bde5c8ddda643a | 0 | 0 | 0 | 4 |
| c51b78ee7956ebf4054f200c56f30179 | 0 | 0 | 0 | 4 |
| 835e9893422046b480440d5f5d82cfda | 0 | 0 | 0 | 4 |
| d65752b4d9d908068cf980d2367cfe6d | 0 | 0 | 0 | 4 |
| cc94c6798400bbb2050d0636a7b37268 | 0 | 0 | 0 | 4 |
| 5f8f3335d10364867020519d4b343b7e | 0 | 0 | 0 | 4 |
| 7f3d76d79dc77652faab672df75edcfc | 0 | 0 | 0 | 4 |

|                                  |   |   |   |   |
|----------------------------------|---|---|---|---|
| fb4bdab987eb25c4f6b0f1d8b0722e80 | 0 | 0 | 0 | 4 |
| 2d251f64f715f5a3116bd8bcab16f830 | 0 | 0 | 0 | 4 |
| 1d418ac2e7573d20c7dec25388f1e64f | 0 | 0 | 0 | 4 |
| 384276536bf035a370dd58d3daef2c70 | 0 | 0 | 0 | 4 |
| 7ce1d7e68d551cc5ba3829b6600b9790 | 0 | 0 | 0 | 4 |
| 30337f0801d4d47fd5f513b850148e5e | 0 | 0 | 0 | 4 |
| 602e31f5996e709d25dfa7cbdd693f7e | 0 | 0 | 0 | 4 |
| 4d7bfdca5c24248a1aa299dc5cd4d123 | 0 | 0 | 0 | 4 |
| f77e2bac2dadd311f09c486d1132d708 | 0 | 0 | 0 | 4 |
| a07ecf361390a75373cff2eb9df6362a | 0 | 0 | 0 | 4 |
| 22eb21cd13b065209ec14384eee65b71 | 0 | 0 | 0 | 4 |
| b8cf3d1472ddcc3cc8ab220c7da08279 | 0 | 0 | 0 | 4 |
| fd52cae888232f47260732244486bfe6 | 0 | 0 | 0 | 4 |
| 3d4f69de2a7935d38fb8a3d83c11c2d3 | 0 | 0 | 0 | 4 |
| 417874bd3afc18e9e179510799350b0c | 0 | 0 | 0 | 4 |
| be48f589014775b07b5b575c88a00288 | 0 | 0 | 0 | 4 |
| 527816eb4da13e428bea93f4286875eb | 0 | 0 | 0 | 4 |
| 93917edf76812f6ce8c3e78c7baeelba | 0 | 0 | 0 | 4 |
| 92f88cf40b29cad4335c4f8458bc8cc  | 0 | 0 | 0 | 4 |
| 1902086a0002fe595538eb057c638e9a | 0 | 0 | 0 | 4 |
| 7fe69ca16eabe2d4db3180812c72ae64 | 0 | 0 | 0 | 4 |
| 2d4c62091d463afe8ffe23ed8e58f472 | 0 | 0 | 0 | 4 |
| 72a3efae76221160771a087e76181820 | 0 | 0 | 0 | 4 |
| 7fbfb3ce22a293eb983d7326fcd3fa72 | 0 | 0 | 0 | 4 |
| 56a0ae1565b25f561a596297f0c521cd | 0 | 0 | 0 | 4 |
| febcc916105bc3aaeb353f9d64822bc5 | 0 | 0 | 0 | 4 |
| e3c19b6458209018fec15b7613d0c57  | 0 | 0 | 0 | 4 |
| 9fe378f9b2c4cb31d8af6102ae2ce46a | 0 | 0 | 0 | 4 |
| 3da6f236700ee0a09895698e39910b88 | 0 | 0 | 0 | 4 |
| 3e4d08c32c80eb378daad2f689481d41 | 0 | 0 | 0 | 4 |
| f7652d984e822d322c9a712b54c44600 | 0 | 0 | 0 | 4 |
| a0d0495ad6b142eeac9942f65ff11cf0 | 0 | 0 | 0 | 4 |
| 18094315cf515a515d9561840c301304 | 0 | 0 | 0 | 4 |
| 355488ec794f41acec858790773c5283 | 0 | 0 | 0 | 4 |
| aed895fa0c12b97c02c65a3e6a9dea2b | 0 | 0 | 0 | 4 |
| d32a9fba35527b57a4666fc9b7b4ae32 | 0 | 0 | 0 | 4 |
| f5b171a8dea2f78bc86c6776eb813282 | 0 | 0 | 0 | 4 |
| c207e9f06aca4b3f44148b1143bcc698 | 0 | 0 | 0 | 4 |
| 7e134a3e9356d42bb88a94125821f78b | 0 | 0 | 0 | 4 |
| eab422adc281250027a19416e5881403 | 0 | 0 | 0 | 4 |
| 5387e3ff4c54f33d5c35414acaa76c67 | 0 | 0 | 0 | 4 |
| e3d3130420d19efb5285b34d06bfa027 | 0 | 0 | 0 | 4 |
| 6fac050e1b1a3b059524d504b703c8f5 | 0 | 0 | 0 | 4 |
| b88272e2c6ca0c78f5b551358be5981d | 0 | 0 | 0 | 4 |

|                                  |   |   |   |   |
|----------------------------------|---|---|---|---|
| f5be1de92fcbe9f3face9c5c83840bdf | 0 | 0 | 0 | 4 |
| de17d40a334a2285a7b0c0c6053be7c0 | 0 | 0 | 0 | 4 |
| 3c55404efe23e2cebdf04884c063ff54 | 0 | 0 | 0 | 4 |
| 8cc927bafb9687fe9b037f076b1a5150 | 0 | 0 | 0 | 4 |
| cc14bf276959792c322fc0fd263cb045 | 0 | 0 | 0 | 4 |
| 93171e5e4c1890d879c0e1ebd1b4140d | 0 | 0 | 0 | 4 |
| 3ce7738ac035326889216aceae618bf0 | 0 | 0 | 0 | 4 |
| eac45790b5ccacf7fedd45f65ad52862 | 0 | 0 | 0 | 4 |
| 235bffb4d8df7c799a61ef16fd33879d | 0 | 0 | 0 | 4 |
| 6489268719c0b515697adf54c3f46319 | 0 | 0 | 0 | 4 |
| 458470ea2e7280bd4a5e49ce7d2479ab | 0 | 0 | 0 | 4 |
| 323b733ce436670131cb450f2af7bc50 | 0 | 0 | 0 | 4 |
| dcc03f5218fab24e28755cf464b6c459 | 0 | 0 | 0 | 4 |
| 6544e8c1fe01cb2b1b52ad2b32af53af | 0 | 0 | 0 | 4 |
| 376d93272e8f3b3f943e21f3932cd5b9 | 0 | 0 | 0 | 4 |
| b857780fde7a1b69f862d74e5ca7eca0 | 0 | 0 | 0 | 4 |
| 3f650a0c1f04f5870c87cd02af4cdd3c | 0 | 0 | 0 | 4 |
| c2bdac5d51fac1aff4a95b0f8826bc97 | 0 | 0 | 0 | 4 |
| 83de4ad32063203440666ebc70576ce6 | 0 | 0 | 0 | 4 |
| e0be0c7879d2aaaad5a888ef2ee1bade | 0 | 0 | 0 | 4 |
| 0105d6233cda3745a190d6310ef951ee | 0 | 0 | 2 | 2 |
| 51dbe6408b11324d21ff601934db3c35 | 0 | 0 | 0 | 4 |
| 4e0d92d4c6110f30a2f2b122c8724915 | 0 | 0 | 0 | 4 |
| 0e2fa2bd8806488ee18126e8773b12d1 | 0 | 0 | 0 | 4 |
| 223144c9361068eb94a22c30c992c785 | 0 | 0 | 0 | 4 |
| 4b6de109acde364defdbfe6712e97eef | 0 | 0 | 0 | 4 |
| 8c5fd91748e5fa3ef12eb54f589ecfa9 | 0 | 0 | 0 | 4 |
| 21d81880354ded0bd34daab5478ef380 | 0 | 0 | 0 | 4 |
| 8aa6fa752f8fb26606342042d4a32c61 | 0 | 0 | 0 | 4 |
| ef3e7909a7b6cd52bbb9f93f2bb4ba2e | 0 | 0 | 0 | 4 |
| 6e8d6e091f87c0b24619ddc8c14a2a3a | 0 | 0 | 0 | 4 |
| c509a527d9ffc49da008f5cbbb984c6d | 0 | 0 | 0 | 4 |
| cd4920752f5fec14a71cb5606c7e152f | 0 | 0 | 0 | 4 |
| 242bc9d8b2715f02d72ccac9dcf1b14a | 0 | 0 | 0 | 4 |
| afd5ad58dc61339776e33b551cfcdd2f | 0 | 0 | 0 | 4 |
| fa92c7f545dbb5e34303a55f2ad75e87 | 0 | 0 | 0 | 4 |
| 197243624acdcf246f7f2f4ca0a74d83 | 0 | 0 | 0 | 4 |
| 487f9c1ccc4679d3a696da306de9f243 | 0 | 0 | 0 | 4 |
| b9e701b01d3a28bafd35ffa2c857f9ff | 0 | 0 | 0 | 4 |
| a339a3a06dd6138b345752ec3b3b1b2b | 0 | 0 | 0 | 4 |
| 91ecf1c3dd844b41ae5812718a740642 | 0 | 0 | 0 | 4 |
| f4bdc04223de545a74176ecbd5db11a7 | 0 | 0 | 4 | 0 |
| 867a21dfa43e6c06ae8c958625406ffc | 0 | 0 | 4 | 0 |
| 7c0c3494e25fd525cb1d35e32cd5a11d | 0 | 0 | 4 | 0 |

|                                   |   |   |   |   |
|-----------------------------------|---|---|---|---|
| f959e9b73713a6728bde710156d58a08  | 0 | 0 | 4 | 0 |
| dec9ff733849ea6380afc80b5258ade1  | 0 | 0 | 4 | 0 |
| 8be5ff8efa7db2e663a26fbb29fd0624  | 0 | 0 | 4 | 0 |
| 8288ed03251c7ec96c032c3ab954bc92  | 0 | 0 | 4 | 0 |
| 3166382c5f92cbddb444a6b59156aff8  | 0 | 0 | 4 | 0 |
| 89b42fa7fca374224f773021eb77019f  | 0 | 0 | 4 | 0 |
| feab01e60311b86dc3388a10c594a51f  | 0 | 0 | 4 | 0 |
| b28fbde8b7d3dd15096081ca51ec35a2  | 0 | 0 | 4 | 0 |
| 4076949adba68707d47edaeb559b550b  | 0 | 0 | 4 | 0 |
| 9d0a5a158b22d068a9a3d17dc63ebbe1  | 0 | 0 | 4 | 0 |
| 5907ea1cb5b3f085d7d9b22b37a9f1f6  | 0 | 0 | 4 | 0 |
| b6200e4a69dbabbb6d377ffb5e7bd8ce  | 0 | 0 | 4 | 0 |
| 1a3b60547c64fa9f021934bec5c3c6eb  | 0 | 0 | 4 | 0 |
| 1d35c7aeb1d9fcee5ae06cf89ab637f3  | 0 | 0 | 4 | 0 |
| 3ac3af603c136b6d850da598be423f18  | 0 | 0 | 4 | 0 |
| 95aae3244055e4075e0b253714cdca9f  | 0 | 0 | 4 | 0 |
| 2dfc6bdc44834d6c00619abca743cbcc  | 0 | 0 | 4 | 0 |
| ccfa7d73b60b9c66e2269cae645131be  | 0 | 0 | 4 | 0 |
| 58e15502659415c277f2da96a4898dfe  | 0 | 0 | 4 | 0 |
| 3923f7ff54694f85a83b109a9e6a4fda  | 0 | 0 | 4 | 0 |
| b555dc7112bc9f9ff7fd682f08531913  | 0 | 0 | 4 | 0 |
| f8c642083f1f9efda6617ba8b7eb9094  | 0 | 0 | 4 | 0 |
| e610baff1de5b673daeedf14472f16ed  | 0 | 0 | 4 | 0 |
| 0ee62332e414e801df0f069256c600f6  | 0 | 0 | 4 | 0 |
| ebcddb969ed945ee012a1897ca27680d  | 0 | 0 | 4 | 0 |
| 98fc4578f01d049909986ae6723a0804  | 0 | 0 | 4 | 0 |
| 1b4ec507ed75a8e8c7c33ac4bcddc2da  | 0 | 0 | 4 | 0 |
| cb01ea5535dbdc232d0099a5b7e45716  | 0 | 0 | 4 | 0 |
| cd59c0cb2ffa86d0ec808290fd07a900  | 0 | 0 | 4 | 0 |
| dd58af428f0c88ebeca519d31084f503  | 0 | 0 | 4 | 0 |
| cf85836a75b05aa8c4cc7aafb82c2aff  | 0 | 0 | 4 | 0 |
| b35c9e302b333b068ccfcbcddeeb0b80a | 0 | 0 | 4 | 0 |
| dd10a988347a38082bf1fbf5b7a1241e  | 0 | 0 | 4 | 0 |
| 1d56609e8f39451de5f838f8ede4d883  | 0 | 0 | 4 | 0 |
| 41ef9956587e721452ea6902f240dc64  | 0 | 0 | 4 | 0 |
| 0377f5141c20924a0082e59a413c66c3  | 0 | 0 | 4 | 0 |
| 26168b2ff954147e9719d209ee30afb8  | 0 | 0 | 4 | 0 |
| 5e01aae524475ad99aeb834ca121bb56  | 0 | 0 | 4 | 0 |
| e316b82f2f9615320e45cf10080d6dd7  | 0 | 0 | 4 | 0 |
| a6748f9b189d45c4b6f1278704553cd8  | 0 | 0 | 4 | 0 |
| b8687b39d14efe63144e416bb54850f5  | 0 | 0 | 4 | 0 |
| 511eedfd6496e87686057d81a08a99c2  | 0 | 0 | 4 | 0 |
| 9825b1f8b281a223a1d280e53ea8597e  | 0 | 0 | 4 | 0 |
| 1e1cf982edaa5b3a0bfbeff8dfa511fb  | 0 | 0 | 4 | 0 |

|                                  |   |   |   |   |
|----------------------------------|---|---|---|---|
| e4c1d2491c58df33fdd857d00cf8eadc | 0 | 0 | 4 | 0 |
| 7e245aedb084d0c5f1f5f6857f99b7bf | 0 | 0 | 4 | 0 |
| afdfbd42d78daed5b88a3808fe1b456a | 0 | 0 | 4 | 0 |
| 1019eab3040de7467e0c116e9d74f972 | 0 | 0 | 4 | 0 |
| 622e739e7c3eff121c5b80b595a15a42 | 0 | 0 | 4 | 0 |
| 0dcadd73cad386fa4753e8628cbd2b27 | 0 | 0 | 4 | 0 |
| 6bbc37f28d596c6eedcf4222893fdb8  | 0 | 0 | 4 | 0 |
| 9440878f9dcbcda7cd5ba9ee5afe1bf2 | 0 | 0 | 4 | 0 |
| 2f501e3fb69b49bfb38e722ab1715c5e | 0 | 0 | 4 | 0 |
| dad6b7a63e826fc3dd7fbf5fde86d0e5 | 0 | 0 | 4 | 0 |
| 1008ead05e6487219de505cb2af3a5d2 | 0 | 0 | 4 | 0 |
| aa1a4288f15e9a3bb76a9af1bbb2331b | 0 | 0 | 4 | 0 |
| 17cdf24edd621e0765b9bb29b1926c39 | 0 | 0 | 4 | 0 |
| 9f0502b62093ddcdf1b0375dad369f8c | 0 | 0 | 4 | 0 |
| 6fae5bcb6009eb419469049c12eba2c0 | 0 | 0 | 4 | 0 |
| 8f73a4d0a96168cd21cc67190b29f638 | 0 | 0 | 4 | 0 |
| 052232bcfec32f6c1674784a2657f7ed | 0 | 0 | 4 | 0 |
| d48849411f9ec930a2c9785117f33a3e | 0 | 0 | 4 | 0 |
| ef11b43bc3881612b5ed699bb16d7784 | 0 | 0 | 4 | 0 |
| 9da357ef1cbf166eeb1df780c0ab6bf9 | 0 | 0 | 4 | 0 |
| 0ba326c6690d67eece0d4da086e9533a | 0 | 0 | 4 | 0 |
| 3bb758d444a0a3f3ab75dc5ca626382a | 0 | 0 | 4 | 0 |
| 86c42a57bc4062661091a9131f51930a | 0 | 0 | 4 | 0 |
| 82f4113fef155aa3423f9e9753838ce  | 0 | 0 | 4 | 0 |
| fb7c94cf5f143d09b23da5e2af492b8  | 0 | 0 | 4 | 0 |
| 52f8ca9e10a84bee1d87bc93c77ee87b | 0 | 0 | 4 | 0 |
| fd8f9e97ac9814076dc5bf6e89e97e1d | 0 | 0 | 4 | 0 |
| 4faecc1692d85882433509f2b3ae96be | 0 | 0 | 4 | 0 |
| 7649783369946cf3d44300ed163dcd7d | 0 | 0 | 4 | 0 |
| 45d9f4239efaleec33f48c525fceb7f1 | 0 | 0 | 4 | 0 |
| 417fbf435dc86e9f4c1e2102049b17cf | 0 | 0 | 4 | 0 |
| f0f8a0d05522dcc18dc399c4aa3467bb | 0 | 0 | 4 | 0 |
| fa6bf0236995d0e3520c0b15cadfce05 | 0 | 0 | 4 | 0 |
| c04acca846db385557a43fb7b4e2ea72 | 0 | 0 | 4 | 0 |
| fd3966c8d056ca2de51ee742d6f6a61b | 0 | 0 | 4 | 0 |
| d1d674506327a91432c0697b7b66a900 | 0 | 0 | 4 | 0 |
| 4b5de5d6c2c8164cb85ada3c335785b0 | 0 | 0 | 4 | 0 |
| cbf810802c7f82ea314ee2da33e58074 | 0 | 0 | 4 | 0 |
| 9a9631908c94dbca993e491982da3b8f | 0 | 0 | 4 | 0 |
| 8b13f5a19c81ba079f705a3fffd5086  | 0 | 0 | 4 | 0 |
| 18f7a70786b79c01a9066eec20eb58f5 | 0 | 0 | 4 | 0 |
| 9e8fb0c3e8cdcbf1059e1778a50d1bfc | 0 | 0 | 4 | 0 |
| d9f0c889c7e2c238e1e3177cba51e56d | 0 | 0 | 4 | 0 |
| 848e317a0e07681a2b6d8250597dbf4f | 0 | 0 | 4 | 0 |

|                                  |   |   |   |   |
|----------------------------------|---|---|---|---|
| ebbbfd64a793976fcc7f620a3d34e4c4 | 0 | 0 | 4 | 0 |
| 12bf1ef93a44bf7bf52fd6f06f615994 | 0 | 0 | 4 | 0 |
| 39f5fa67c090b0d4cc1fe7374261b8d2 | 0 | 0 | 4 | 0 |
| e0b8d7e78147cafb7c61a167ae351b4b | 0 | 0 | 4 | 0 |
| 206818da186d353eaedb4e4671aeaa   | 0 | 0 | 4 | 0 |
| 8a530e1f17cd4ab039cab79bf942865b | 0 | 0 | 4 | 0 |
| da6bd5e3e9ced11a8c05704eb84ed5cb | 0 | 0 | 4 | 0 |
| e27bfe3812976096980cad8203eac568 | 0 | 0 | 4 | 0 |
| fa1affe1b14e0891c85952e40abf799e | 0 | 0 | 4 | 0 |
| 7dc545ddc9e3b66184dc992f80caa640 | 0 | 0 | 4 | 0 |
| 2efecfbcb7691a56234061711cc314b3 | 0 | 0 | 4 | 0 |
| 502d33073d46e1d00de0fa799f2e6954 | 0 | 0 | 4 | 0 |
| dafe164ca5c7899b81788451851c20ce | 0 | 0 | 4 | 0 |
| c149e6658d27fc60630dc4dec4face80 | 0 | 0 | 4 | 0 |
| fe81df1f71d31ce7aad1c679076ae721 | 0 | 0 | 4 | 0 |
| c92a14723b8825144277031939f227fe | 0 | 0 | 4 | 0 |
| 5f663c28e1f5231b09106557c928ebe5 | 0 | 0 | 4 | 0 |
| c5d956c34371e230061609f63ee7d56f | 0 | 0 | 4 | 0 |
| 1d24a4af049bfe6ae88b935959fa189  | 0 | 0 | 4 | 0 |
| 56a843ae2e6c8bab55839a2f3cf79975 | 0 | 0 | 4 | 0 |
| 32208f9247620a3ac9da767bf7f7e503 | 0 | 0 | 4 | 0 |
| d976c0b4033a8b465de744634bd432ff | 0 | 0 | 4 | 0 |
| 8d23c20c47d241677f7bdfc64482c811 | 0 | 0 | 4 | 0 |
| 968a9888140e99066991d3732586644b | 0 | 0 | 4 | 0 |
| ebbd84c93a80b61ed8f7b8007aefd869 | 0 | 0 | 4 | 0 |
| 06bf9b1d9875c682d38991c11e0b7d77 | 0 | 0 | 4 | 0 |
| b4626687ce739acb43ea001932eac1e7 | 0 | 0 | 4 | 0 |
| 318ade71ce19e496e02ed6226571851a | 0 | 0 | 4 | 0 |
| 68bd50632786777c57c30195e939eb48 | 0 | 0 | 4 | 0 |
| ad220a81b968f52a268efa81e5941e1d | 0 | 0 | 4 | 0 |
| 2ea056f6fa6d5961972bb26589df54d1 | 0 | 0 | 4 | 0 |
| b19b4e7b3d56abfdf237ca9d12911c1a | 0 | 0 | 4 | 0 |
| 2a15e61f34b9f53959314d16d71cc7fc | 0 | 0 | 4 | 0 |
| 549424f8abe42a20e04461d4e72b41d8 | 0 | 0 | 4 | 0 |
| 7ad5bcb641e22d1ab6d16280fd856998 | 0 | 0 | 4 | 0 |
| 1bf15123bfa47a029ec40887f463135b | 0 | 0 | 4 | 0 |
| 4a628f6fe0c7c131f384c4c5eef3080c | 0 | 0 | 4 | 0 |
| d0c980bfa5935f503f2abe1e1c6d1e73 | 0 | 0 | 4 | 0 |
| 99638b8a179f08afe9ec994e208ee375 | 0 | 0 | 4 | 0 |
| d5970d7138b85b16b95bc58291259b00 | 0 | 0 | 4 | 0 |
| 6993a9489369c312ce2d1e100e14833b | 0 | 0 | 4 | 0 |
| ae6a2026b45da64d1bc83f7a47ca1ccc | 0 | 0 | 4 | 0 |
| 8694a623f911603806361079e71ff5dd | 0 | 0 | 4 | 0 |
| 1a7cc8c5f9f5403b13bbb2d35c59d594 | 0 | 0 | 4 | 0 |



|                                  |   |   |   |   |
|----------------------------------|---|---|---|---|
| ca2fad33ad8a103c9dfb09cca14309e4 | 0 | 0 | 4 | 0 |
| 1181b7fec0352eb6490ed3fb9402b0ff | 0 | 0 | 4 | 0 |
| 1055c20cd6efcd55aad913d0697e67ba | 0 | 0 | 4 | 0 |
| ac60cf66bf08763fe52088c4d498a6a4 | 0 | 0 | 4 | 0 |
| 0f1e709c1284a548fb8770dbb8ef3743 | 0 | 0 | 4 | 0 |
| 3df479eab567feba42c76b451418348d | 0 | 0 | 4 | 0 |
| 0d9d4b3cc7ebee30c63f22e56619bbb7 | 0 | 0 | 4 | 0 |
| 8c7961449506dfd885ee077701c56abb | 0 | 0 | 4 | 0 |
| dde0d0325ffdb1528fc5208483b9b398 | 0 | 0 | 4 | 0 |
| 8788d323616e1b0eb943bcfd365a1e18 | 0 | 0 | 4 | 0 |
| 5cd6c16cf5fd444f2050f73e3d0b59df | 0 | 0 | 4 | 0 |
| 07527f2f883bede3a52549efdddd56cc | 0 | 0 | 4 | 0 |
| a73d16642b7bf463a14ea3077e2d7600 | 0 | 0 | 4 | 0 |
| 6967ef0e567309d3e19c0581427fff09 | 0 | 0 | 4 | 0 |
| a6769aedd94dd972e456eb1adba8822d | 0 | 0 | 4 | 0 |
| 359ab683c944d2b379848614f4bac820 | 0 | 0 | 4 | 0 |
| e384449f983773e16ebfc9346806a59b | 0 | 0 | 4 | 0 |
| ef6dccfa4ce39c5ad69c75ecbfff90f8 | 0 | 0 | 4 | 0 |
| c4e471fe263cdd490bb8e030b8b0b184 | 0 | 0 | 4 | 0 |
| c1cbfbfeb4669d70fd1f6a066901079b | 0 | 0 | 4 | 0 |
| a1f61112cfbc4715c7257087fad11028 | 0 | 0 | 4 | 0 |
| e2c689fb4283c625da4894a040c07978 | 0 | 0 | 4 | 0 |
| 1e0fbcf7acba8d0a549299b83242eece | 0 | 0 | 4 | 0 |
| 02593ab7c456869629aa60abc8a57bfd | 0 | 0 | 4 | 0 |
| 793289a61e22c7ba0382a4b0e20bd901 | 0 | 0 | 4 | 0 |
| 98026f07bf8fdaf02a1c8f29c9e599bf | 0 | 0 | 4 | 0 |
| 72ea012eabef28048ebdc1961c5106b3 | 0 | 0 | 4 | 0 |
| f4f6977b212d513937b0bc4cfb1f8338 | 0 | 0 | 4 | 0 |
| a7f498c92076cd60c9f631685ba7a855 | 0 | 0 | 4 | 0 |
| f3ecfa63bd851f7ec487839356680be8 | 0 | 0 | 4 | 0 |
| c170c6749352a535891bf83cee56bc12 | 0 | 0 | 4 | 0 |
| cb779b8336117cb589f170cf62827882 | 0 | 0 | 4 | 0 |
| 5f723af636af17bdfa3b0de06559e265 | 0 | 0 | 4 | 0 |
| 8573a27db1390f167b4551a478e06514 | 0 | 0 | 4 | 0 |
| e2fb88c18709c9a121e06c6526758436 | 0 | 0 | 4 | 0 |
| b5dd967a583cf49fe9cac4ae3ccbffa7 | 0 | 0 | 4 | 0 |
| f0d4ee92bbad6dd34c6a1512324443cf | 0 | 0 | 4 | 0 |
| cfb8f220526c3bf5f1b156fdf5c3e8f3 | 3 | 0 | 0 | 0 |
| 64f45e9a541f4b09ff3dd2cc5360f6d8 | 3 | 0 | 0 | 0 |
| 544dff48a8b403377784442a0ddbc995 | 3 | 0 | 0 | 0 |
| ba291121f9eb4afe4927cef5f65983f0 | 3 | 0 | 0 | 0 |
| a0e7443d4c293aaf8ab6323a01d2e537 | 3 | 0 | 0 | 0 |
| a09e17662cde469d11546f1160b84080 | 3 | 0 | 0 | 0 |
| c4403623468119c3e716f0258e7e4a45 | 3 | 0 | 0 | 0 |

|                                  |   |   |   |   |
|----------------------------------|---|---|---|---|
| 569894b6fafdec11e50c013134e6e925 | 3 | 0 | 0 | 0 |
| d6c2a9f12de399f203d26243f2aafa2e | 3 | 0 | 0 | 0 |
| 6a9a028c96c8f954fb0e0569187c8ef5 | 3 | 0 | 0 | 0 |
| 1917dff0063dc84e9cddd05dd8bee317 | 3 | 0 | 0 | 0 |
| 494c8df724730325d6c4c94e7fb0fe20 | 3 | 0 | 0 | 0 |
| d06218d41d5cd97507e0c05c8217c461 | 3 | 0 | 0 | 0 |
| 9e1f278e3c773b624ad96ed75e1d3909 | 3 | 0 | 0 | 0 |
| f1d1bbaed739d145650d52efc6b39b70 | 3 | 0 | 0 | 0 |
| 41fed59664973d51555a7423188542b5 | 3 | 0 | 0 | 0 |
| d007e14c90735af5d3296a76e9c99590 | 3 | 0 | 0 | 0 |
| 4f59f74710054a6c941819bb8c2013cc | 3 | 0 | 0 | 0 |
| af1b45947409a919a9a6ebe40f2057b1 | 3 | 0 | 0 | 0 |
| 5a99c3682bb9f9895cfb1a99e91b4157 | 3 | 0 | 0 | 0 |
| 2fd657b9c796e40e022f1556361c7852 | 3 | 0 | 0 | 0 |
| e35c9864651066649af0cd92c038e729 | 3 | 0 | 0 | 0 |
| f0fafb01cac69c356b6453bd91e64d4  | 3 | 0 | 0 | 0 |
| 4751ca8f2b5f8574f25e39b58319c351 | 3 | 0 | 0 | 0 |
| 3963c1687b2b0e4f6c6e360c190d425b | 3 | 0 | 0 | 0 |
| be913de75cdf2cba619a980d0c26abe  | 3 | 0 | 0 | 0 |
| ffa6d6932727579ff15e6ed9cc44e420 | 3 | 0 | 0 | 0 |
| a315ffa2ccb09b043428313209be6f2  | 3 | 0 | 0 | 0 |
| f6311297061cc762f54aeebd13ae1ce6 | 3 | 0 | 0 | 0 |
| d0ec4e3a76566de8920064948a6455c9 | 3 | 0 | 0 | 0 |
| 1e39e9091f186609cc1f9196545f9858 | 3 | 0 | 0 | 0 |
| e858569c21a1cd59a1f2365269d333b9 | 3 | 0 | 0 | 0 |
| 69acaab458a5d9e36549b84358902e55 | 3 | 0 | 0 | 0 |
| effdf384260262fe2627bf89c08911c2 | 3 | 0 | 0 | 0 |
| 4b3e1e4d7fc7dd24bb338c2bf9fa7508 | 3 | 0 | 0 | 0 |
| 5f1884b3e0d7a18940e779d12b6fab1f | 3 | 0 | 0 | 0 |
| f8513fc2fa1df46ac7cbf6a16cc891f8 | 3 | 0 | 0 | 0 |
| 78e233dfebb0a39330ba339d845ec8e1 | 3 | 0 | 0 | 0 |
| 1ee1d4d44cd687ffb94a78cf8f060ac5 | 3 | 0 | 0 | 0 |
| ecf91cc136703e5949132c759506434c | 3 | 0 | 0 | 0 |
| 817b3463db4015cbc4f32cfc760bdc12 | 3 | 0 | 0 | 0 |
| bd2864f98511d753413867496808e071 | 3 | 0 | 0 | 0 |
| 0da983f91b57bea711c52b809345eec1 | 3 | 0 | 0 | 0 |
| 0c7b6a30a605291c9bac06e18d274548 | 3 | 0 | 0 | 0 |
| 70f009dd9d46c665bc8f810a92b09160 | 3 | 0 | 0 | 0 |
| 889aa601234bd6b68ab0e626bbfb4013 | 3 | 0 | 0 | 0 |
| 5541808a1c880606e316d59cdfb9a085 | 3 | 0 | 0 | 0 |
| 488ab3646911738722c472560fb358d0 | 3 | 0 | 0 | 0 |
| 17f1c3b80fd112e76df75533b43015f2 | 3 | 0 | 0 | 0 |
| 97838992d552df0ddcc6701006d44cd5 | 3 | 0 | 0 | 0 |
| 5f4de42cadda7def977888e028586c2  | 3 | 0 | 0 | 0 |

|                                   |   |   |   |   |
|-----------------------------------|---|---|---|---|
| 3029698cde0b9489acf144e72db821ed  | 3 | 0 | 0 | 0 |
| a5cf090cb96a8e1e4f401eadc24243d8  | 3 | 0 | 0 | 0 |
| f022c25183e0ae9256822855782abaff  | 3 | 0 | 0 | 0 |
| fdbad8b0851beb6c64b57f5839fd5723  | 3 | 0 | 0 | 0 |
| 77ad593e283d54cb0ff33c7bf0b6cb7d  | 3 | 0 | 0 | 0 |
| e3fcd2ba8977695c31371092f7bc2a73  | 3 | 0 | 0 | 0 |
| f8182d1a0b71606ddb06ad2a171039bc  | 3 | 0 | 0 | 0 |
| d1cdf161c699b90e30c39042a9098740  | 3 | 0 | 0 | 0 |
| 4f5271d103e8cb9db70476f81ffd8101  | 3 | 0 | 0 | 0 |
| 7aeec4673e1f711dfcd7e0ce55cd7ad8  | 3 | 0 | 0 | 0 |
| 07b34acf1baf86ee283d300f52e264a7  | 3 | 0 | 0 | 0 |
| b20e67277729b55e6e4f5f99bbebf08e  | 3 | 0 | 0 | 0 |
| 7513111e71ea469c20d159576ebdb7c6  | 3 | 0 | 0 | 0 |
| 5ac74ec1b26499db3c519b7312f93f62  | 3 | 0 | 0 | 0 |
| 78fabbb982ec8ce45c36d1e416d52365  | 3 | 0 | 0 | 0 |
| cccc0c8cbf65664804420b898cad7d6f  | 3 | 0 | 0 | 0 |
| 641f40a22419d8fce3e96360789acd3a  | 3 | 0 | 0 | 0 |
| daacdcf4e0e367238d8d7ba055439d5b  | 3 | 0 | 0 | 0 |
| 40c3623af40fe8fdb59a4ab70c178e0c  | 3 | 0 | 0 | 0 |
| 5836ddd9b8f2b3b68d505f7e2b59d419  | 3 | 0 | 0 | 0 |
| d426253eb7130efba742a368ca78b68d  | 3 | 0 | 0 | 0 |
| 06e28e3464eb122ca73a88e520af3e93  | 3 | 0 | 0 | 0 |
| 6644de8e0b5fb63fbb6be1892cfb0cef  | 3 | 0 | 0 | 0 |
| 2cc994e7169243ff871950b607f301ff  | 3 | 0 | 0 | 0 |
| 188921d67ee28078042b98da05bba0e6  | 3 | 0 | 0 | 0 |
| b65b394e4268006fedbff55bec886c53  | 3 | 0 | 0 | 0 |
| 26b661b8e7548268d90bcacf294c76253 | 3 | 0 | 0 | 0 |
| e1909153d42c9da3fe2e0e17cc7bb3f5  | 3 | 0 | 0 | 0 |
| 19323d4c2ae5cd946e14030841fbd3f5  | 3 | 0 | 0 | 0 |
| 0c90a6f620e279cbf44774446623407e  | 3 | 0 | 0 | 0 |
| 219b83f35fe4c11da8337c3e9f095ec0  | 3 | 0 | 0 | 0 |
| 2f3bf32cad408c1481d4086d4b5ec521  | 3 | 0 | 0 | 0 |
| bb9a2877baff299cec0db0dc31f6364f  | 3 | 0 | 0 | 0 |
| 87846b26b200727e64dd5679958f1e55  | 3 | 0 | 0 | 0 |
| 22ad604c8386144b1f1a84e5eeae01d6  | 3 | 0 | 0 | 0 |
| 81d342825936b53fe9f77f20c70a6a0e  | 3 | 0 | 0 | 0 |
| b111f18cac05b8bcb9c50d9c85a96d03  | 3 | 0 | 0 | 0 |
| dfdd3411d2dddadaf173c5d2724c9ff5  | 3 | 0 | 0 | 0 |
| afa263a4930a1f35a5756756b30349f0  | 3 | 0 | 0 | 0 |
| ba9b8af66ef25073d5658975b7f46172  | 3 | 0 | 0 | 0 |
| 41376c8759f3bfff08e4fd91b3ad526f1 | 3 | 0 | 0 | 0 |
| c3fb2196c6afaff0a2c1c3a9b04e9cfa  | 3 | 0 | 0 | 0 |
| c871c3adc37604c89c64362783ec7c45  | 3 | 0 | 0 | 0 |
| ca89f17f0f20b850d835ec0e7cbb7e14  | 3 | 0 | 0 | 0 |

|                                  |   |   |   |   |
|----------------------------------|---|---|---|---|
| 42ad94fc87797cc1fa02b3bbb3cea086 | 3 | 0 | 0 | 0 |
| 20bdf844bc7e8ad733b190ee0232a9b  | 3 | 0 | 0 | 0 |
| 161d5eca147ddebb54fa94f18232a169 | 3 | 0 | 0 | 0 |
| d868716f459918169353914b02d32b05 | 3 | 0 | 0 | 0 |
| 0e8195299f56372a18dafccc5a8c8137 | 3 | 0 | 0 | 0 |
| 2a4a71f048c6ac8e1c5f8f94f57d1e14 | 3 | 0 | 0 | 0 |
| 08cf4060efb41f2bae34e7ff779075ba | 3 | 0 | 0 | 0 |
| 013dc74375932eb15cb3dad0f6315ab3 | 3 | 0 | 0 | 0 |
| aa1757141d85977aefe5ea46870c1aee | 3 | 0 | 0 | 0 |
| a6875e1d33fab7859b50259703270e51 | 3 | 0 | 0 | 0 |
| e5a8160e563b1911849481da73d35f1d | 3 | 0 | 0 | 0 |
| 48c1182ea7c8e17dfec493f5f66e1f05 | 3 | 0 | 0 | 0 |
| e54e5bfdf15dbf36c1c7a1e71af3fc85 | 3 | 0 | 0 | 0 |
| 47f2fd9eef74967f8523cdbfd888382e | 3 | 0 | 0 | 0 |
| 55d9644dcb59498b7cbcd98b48e32e04 | 3 | 0 | 0 | 0 |
| 81c9f183ac73aef89676efdd42a159c  | 3 | 0 | 0 | 0 |
| 2dbf5bf5134ede0c1932b424a4e16f9f | 3 | 0 | 0 | 0 |
| d65d1d2de32b0acfbd259ba6c2b85291 | 3 | 0 | 0 | 0 |
| c2e819aaa5e9611f39c545fdb5f28ed3 | 3 | 0 | 0 | 0 |
| d608e4529c0f6cef588dbeb9368d8778 | 3 | 0 | 0 | 0 |
| 8e3fd86514cfcf428ab716c22b82a1c7 | 3 | 0 | 0 | 0 |
| e5888e82633d8f70869c77be8c23c9d6 | 3 | 0 | 0 | 0 |
| eccc8750095af27076ac5658f77a8651 | 3 | 0 | 0 | 0 |
| 164bacabe61ebacd3f491ab4d35a229d | 3 | 0 | 0 | 0 |
| 2ffe1d578e8710e981dec5b8757321f5 | 3 | 0 | 0 | 0 |
| fb6ce03339a1cf78c558ea4de358318a | 3 | 0 | 0 | 0 |
| aa0a5a670de31f9bf13a9119b4a1d79a | 3 | 0 | 0 | 0 |
| 2f87a05ae2dfc3d93705e71ad133cfb5 | 3 | 0 | 0 | 0 |
| 43660c6eb26ee7f0b3af01d040ae28b3 | 3 | 0 | 0 | 0 |
| ae0f8e607b685875c76ad45b6f2269b5 | 3 | 0 | 0 | 0 |
| b61b4984076cb0b5611c5ceecd5cc8e9 | 3 | 0 | 0 | 0 |
| 5f5513d84cd5c22c0e7bcb4acea75518 | 3 | 0 | 0 | 0 |
| 4e8f031ecc5683ebf1ef530d1d3dce52 | 3 | 0 | 0 | 0 |
| d05e7cbde116c319181c70acbbd53ef9 | 3 | 0 | 0 | 0 |
| 0fb2c6c9a588fc83b5b2d12a80f94fd7 | 3 | 0 | 0 | 0 |
| 802c38a6d1724dc59ea769a3d294048b | 3 | 0 | 0 | 0 |
| 3a3826224cc42638a9e608d4a63ee937 | 3 | 0 | 0 | 0 |
| 281ed06564042474d4c8e676f4323362 | 3 | 0 | 0 | 0 |
| 1b8d0b071c909654a9e43ff6c85a6a79 | 3 | 0 | 0 | 0 |
| 8e2abe0e880d8496d6c3de4f7b175b40 | 3 | 0 | 0 | 0 |
| 5e229f78a1041c2bb1739b66db365b80 | 3 | 0 | 0 | 0 |
| 6024ac080f2dbce7dfafa10487944521 | 3 | 0 | 0 | 0 |
| e9bd08ae319f6cf87bc4518dbd29b163 | 3 | 0 | 0 | 0 |
| 069b904a985d66f7717fe7df3c631490 | 3 | 0 | 0 | 0 |

|                                   |   |   |   |   |
|-----------------------------------|---|---|---|---|
| 5bc85de012393cb5852605775bb282f9  | 3 | 0 | 0 | 0 |
| 2877a6929148ba5e8afbed0eae2126e7  | 3 | 0 | 0 | 0 |
| 980c45b1f083c16095c0970b5cea5029  | 3 | 0 | 0 | 0 |
| 83fc336c9c48d28086c7dc6201ac1c7d  | 3 | 0 | 0 | 0 |
| 14f3be0bc4be0489124a741052311d54  | 3 | 0 | 0 | 0 |
| 38438492578b052671306e576064cda7  | 3 | 0 | 0 | 0 |
| f8353468251d3ca589774cc9a2804b66  | 3 | 0 | 0 | 0 |
| f6c0191dd254cf759f92880b9f581361  | 3 | 0 | 0 | 0 |
| eebddabcef3761c94592f7447b4e3ce4  | 3 | 0 | 0 | 0 |
| ea9c96f336b92d1a47467932b1b88d387 | 3 | 0 | 0 | 0 |
| a25c8370654ed3705cde60d593a617f6  | 3 | 0 | 0 | 0 |
| 745d32c61239e4bde7121757c73e8082  | 3 | 0 | 0 | 0 |
| deda3c9bd1070c5e10fe93997937f3df  | 3 | 0 | 0 | 0 |
| b41620ffe3561dff81fb3f68b6a451fe  | 3 | 0 | 0 | 0 |
| 8cb58fa11921725bc3f63559875929ec  | 3 | 0 | 0 | 0 |
| da20a2d36670d733894ac590faa952f8  | 3 | 0 | 0 | 0 |
| f58dcf99bdc259b07a4e351cdf1dcf1b  | 3 | 0 | 0 | 0 |
| eee419177aba374f7cec9856b533ea13  | 3 | 0 | 0 | 0 |
| 4b81d683464b0383c2d93e57e97895e3  | 3 | 0 | 0 | 0 |
| bde027a6d6840466b962671479c6f317  | 3 | 0 | 0 | 0 |
| 9ad7ac6fdc9ffa0ea5caa344f8ea1892  | 3 | 0 | 0 | 0 |
| 1d314be53f7e2161c32a3c99cc293212  | 3 | 0 | 0 | 0 |
| 5306f108ee6abc1086814a532e859cca  | 3 | 0 | 0 | 0 |
| ee90e13706f0780c663a965edcfd9744  | 3 | 0 | 0 | 0 |
| 439f9acd8031afe14397799f638300f7  | 3 | 0 | 0 | 0 |
| deb413da22d67094c96b4acb9f1b83e   | 3 | 0 | 0 | 0 |
| 7d1bb64445a5133566667a4c5a35cdeb  | 3 | 0 | 0 | 0 |
| 6a3fc06d7acc98101283ecbbbae1b74   | 3 | 0 | 0 | 0 |
| dd9d9c40bccc4aad716eeb661ac553a2  | 3 | 0 | 0 | 0 |
| cd776eb05fa6b710c4895952cc90ad3b  | 3 | 0 | 0 | 0 |
| 50a4e68a484b7311109a30af41b93d71  | 3 | 0 | 0 | 0 |
| a9979c667ee17ab47794934b9e97d5c8  | 3 | 0 | 0 | 0 |
| 4421615890415c3d0831344e21345873  | 3 | 0 | 0 | 0 |
| 077d5f46b94bb2c7c250f239bdaf3c40  | 3 | 0 | 0 | 0 |
| 2799889fc6e87bf821f1a4708039fe6c  | 3 | 0 | 0 | 0 |
| 6759442f5d9c2e1c09700615d954311c  | 3 | 0 | 0 | 0 |
| 2e626560ac0e637c74670df3116c2b26  | 3 | 0 | 0 | 0 |
| 540a604ccc303ade866e14c0055d043a  | 3 | 0 | 0 | 0 |
| 0f29d1fd175561a4aaa4aaa14ec12a55  | 3 | 0 | 0 | 0 |
| b169f4d10556e9bd6267525228890f7a  | 3 | 0 | 0 | 0 |
| 6801238ede80ae3c924782123448e6a7  | 3 | 0 | 0 | 0 |
| 808539c62d76a0d000177c2e58c86b7a  | 3 | 0 | 0 | 0 |
| 1899a206abab345d7a4c3dd799124df8  | 3 | 0 | 0 | 0 |
| cc7e7470253075d5cbd324e5410855ff  | 3 | 0 | 0 | 0 |

|                                  |   |   |   |   |
|----------------------------------|---|---|---|---|
| 83d7185d64a02e83f99d7073125e47d3 | 3 | 0 | 0 | 0 |
| 5ca3814f5595caa06f6ecea4b8b4d8a1 | 3 | 0 | 0 | 0 |
| 10a71dba60ffeb2f56f1b673e1c483d6 | 3 | 0 | 0 | 0 |
| ca8a135b601a3edfaa8718842f0e1dad | 3 | 0 | 0 | 0 |
| 30ccbca8a3207a121af0a588651a5bdb | 3 | 0 | 0 | 0 |
| 33877cbddf8514df953c05a52a7e653c | 3 | 0 | 0 | 0 |
| 325e26aa01aa806fcdc497380d074249 | 3 | 0 | 0 | 0 |
| cfdb5d561889d7c5e9b71f76032af0f2 | 3 | 0 | 0 | 0 |
| eb7992d6341d859341b52033ad9a71ff | 3 | 0 | 0 | 0 |
| 3b6447766f9ba671dfa6f3ac2719a821 | 3 | 0 | 0 | 0 |
| 3ca9f97af3e76002ff1e13d1492004a6 | 3 | 0 | 0 | 0 |
| 5c2e4c2a618a96ab1ee9d5be848bffb9 | 3 | 0 | 0 | 0 |
| 3728a8f32d8daa8a928dddaf3e8af994 | 3 | 0 | 0 | 0 |
| a3a88050a00282c6843ba43d3b5013d4 | 3 | 0 | 0 | 0 |
| 2c552b12af7b7cb05b786d620cd852ba | 3 | 0 | 0 | 0 |
| 530c681dcf6807a63a8827658cc15651 | 3 | 0 | 0 | 0 |
| 61a00b60f3c19fc3d2889e284fa18cb7 | 3 | 0 | 0 | 0 |
| 247cf147e1c2fa18b11845c9d19f082f | 3 | 0 | 0 | 0 |
| b4851916ccb04270ea10416cee9d505c | 3 | 0 | 0 | 0 |
| 7860b279b3c4efd42b4b28b353b50373 | 3 | 0 | 0 | 0 |
| 597325b1bc7a9ebc714269cbabe4ab14 | 3 | 0 | 0 | 0 |
| 3a4b89020fcfeeba0eb99322e8afbbfe | 3 | 0 | 0 | 0 |
| 17733df44261598abca5b2d78847ee45 | 3 | 0 | 0 | 0 |
| 25bcac2b530c90a21490e419d74cfbfc | 3 | 0 | 0 | 0 |
| 176153c44e2b4e79d2bb759757747145 | 3 | 0 | 0 | 0 |
| 98b5ea2e0d0d1eadc52fa37c0f72d886 | 3 | 0 | 0 | 0 |
| 4474c294772c3f505c331d18d6174bfc | 3 | 0 | 0 | 0 |
| 82b533672f12a48c3fbb40c39d0ba7fb | 3 | 0 | 0 | 0 |
| 98bf58f0bcfc787f3e043536d1072cd2 | 3 | 0 | 0 | 0 |
| 95b5a9cdae374b4088d4469a6e41de7a | 3 | 0 | 0 | 0 |
| 92e5f3fe2bda71e4a52967162591f6fc | 3 | 0 | 0 | 0 |
| 027766df9d1df34b2a30254a39f04ba1 | 3 | 0 | 0 | 0 |
| cb59589e846eed390d351db9639b8ff1 | 3 | 0 | 0 | 0 |
| c28a4970e458e2355f5ba40d221303f2 | 3 | 0 | 0 | 0 |
| 161d7a66085b8a64c37f8425c536fbfc | 3 | 0 | 0 | 0 |
| 46e14813c78eb9c9e702d5971932efd8 | 3 | 0 | 0 | 0 |
| 5040b2a2e66ba01e8b06698518b025d8 | 3 | 0 | 0 | 0 |
| f414520fd182a0382892497ebdd8a956 | 3 | 0 | 0 | 0 |
| b53be93b6d26124a6c85e9e74e5d156d | 3 | 0 | 0 | 0 |
| 1a2f7a05aee11b4713d4877d2a3643dc | 3 | 0 | 0 | 0 |
| 41124268bf29c038d68612aef8d420b6 | 3 | 0 | 0 | 0 |
| 605e114f1e71f34e3a9789d8a5853807 | 3 | 0 | 0 | 0 |
| 44aae1f16068ce34b42149f2fe6a9b19 | 3 | 0 | 0 | 0 |
| 297eeeb84c2d6bd052f86a890f596d81 | 3 | 0 | 0 | 0 |

|                                  |   |   |   |   |
|----------------------------------|---|---|---|---|
| 1ab31638b1981202eee318a49466bb0a | 3 | 0 | 0 | 0 |
| 52af23577922b924cffb8586d32091fa | 3 | 0 | 0 | 0 |
| 73fd7213e7b5bc79da2be2b9a8aada27 | 3 | 0 | 0 | 0 |
| 3e41f3dd58b8bc2b1a48e07dbbfdc020 | 3 | 0 | 0 | 0 |
| 7369f72b78846ec29f4f0d48e9b852eb | 3 | 0 | 0 | 0 |
| 7a1a4130ace6bf06e8561bda7145aedb | 3 | 0 | 0 | 0 |
| 3cd9ec34d9343df9a050bc7c1fcd8514 | 3 | 0 | 0 | 0 |
| 021d83a64b776db3b174232e13388b74 | 3 | 0 | 0 | 0 |
| c927f15664bbf5d4ad792694e4985366 | 3 | 0 | 0 | 0 |
| b57a9943c4f255c68e8db2f99fd07e11 | 3 | 0 | 0 | 0 |
| 1fe0bfb0b1cb6bd100ad9313ee1cfea5 | 3 | 0 | 0 | 0 |
| 58d16c83609938bea8c3095f0d051858 | 3 | 0 | 0 | 0 |
| 3c79100738eef0cc09b5f4e3e2f65632 | 3 | 0 | 0 | 0 |
| bec4f439988fd77fcc11492e37f194e7 | 3 | 0 | 0 | 0 |
| dc081efc8dd74cd7a350ac4493e7739d | 3 | 0 | 0 | 0 |
| 9b5ac6a1aed291166cab4c4608b6b28d | 3 | 0 | 0 | 0 |
| 2cbe5f6004d21fe6069594e1055e9b33 | 3 | 0 | 0 | 0 |
| 2842dc541674827c8116fe37044062e5 | 3 | 0 | 0 | 0 |
| f6517e9ba71b241ff7e2f0fc3d2bbe70 | 3 | 0 | 0 | 0 |
| 4c21d9c4b8ecd2c5067b2af306bd9e7c | 3 | 0 | 0 | 0 |
| 4845978c5f5f3cc06b9d4fb267f13238 | 3 | 0 | 0 | 0 |
| 0e75bf32d02c8b19d2987104a89ef9b2 | 3 | 0 | 0 | 0 |
| b0beb6d27ae2435f4292cd35008c9e5d | 3 | 0 | 0 | 0 |
| 93b8d80316a5193673cd49ef7caab872 | 3 | 0 | 0 | 0 |
| 2904e0df7022288788e0873ea4057f97 | 3 | 0 | 0 | 0 |
| 5aaab964b4daeffe3ce7c9199a827695 | 3 | 0 | 0 | 0 |
| 45fc0c71d28cf2f460c1a747660a7627 | 3 | 0 | 0 | 0 |
| 75daaab59e84dafc1ad8964f281ca5f3 | 3 | 0 | 0 | 0 |
| 515f35847672cc60958bcb8f43063ba5 | 3 | 0 | 0 | 0 |
| 9e9b81f72356b9f7dcda586292dfc209 | 3 | 0 | 0 | 0 |
| 1ab8154b679bb20268d851cff0a7bd56 | 3 | 0 | 0 | 0 |
| fe507a63986b336f436a39dc974ec8a6 | 3 | 0 | 0 | 0 |
| 6ac1f1a6a80fe2c4cab88f34e568b3d4 | 3 | 0 | 0 | 0 |
| 787e7da9708384becd78f105b8426139 | 3 | 0 | 0 | 0 |
| 97777ba6a99eb834dfda3a650669d9d6 | 3 | 0 | 0 | 0 |
| a9b3fb185f38cea9b47b34a17a9cd1a1 | 3 | 0 | 0 | 0 |
| bb8d652e3bafb4f113f4d6b1d85c0981 | 3 | 0 | 0 | 0 |
| f6cf3021ede3e63d29a5e3ec79914028 | 3 | 0 | 0 | 0 |
| b287bb8fdce17b8a86d48e910a40c52e | 3 | 0 | 0 | 0 |
| 9bc4179fb451939859c84f7319d3ae91 | 3 | 0 | 0 | 0 |
| b0dfcade693958b48495344b27a459ce | 3 | 0 | 0 | 0 |
| 3a869e5c3c304c0e767d0ed88fd38fa4 | 3 | 0 | 0 | 0 |
| 0b6218ac7ac51ac69f0c9aa9206ba6a4 | 3 | 0 | 0 | 0 |
| cb21efb421c45853d642f3d088a28c8d | 3 | 0 | 0 | 0 |

|                                  |   |   |   |   |
|----------------------------------|---|---|---|---|
| 6af711323baea917946b4a98a2bb4396 | 3 | 0 | 0 | 0 |
| 8c598996339fd51f80b629aef9e4e27d | 3 | 0 | 0 | 0 |
| 5687d5bd5438a7cbaf42995ba885910f | 3 | 0 | 0 | 0 |
| b2f53b9acef7c5f9740122a3ecf3ba97 | 3 | 0 | 0 | 0 |
| f00dc7f0e21b0cdd0ca876c81a4a1e84 | 3 | 0 | 0 | 0 |
| 65d3db97379c18b1ac4bf506800db083 | 3 | 0 | 0 | 0 |
| 36603f87248ab2515bd263eb6394874b | 3 | 0 | 0 | 0 |
| 0a29f4d6fa3ede103e3ebb2097cbb25d | 3 | 0 | 0 | 0 |
| dd2f6424edb139bc0f0534139cc646e5 | 3 | 0 | 0 | 0 |
| e7950b662f427d3e48d44b568668ec02 | 3 | 0 | 0 | 0 |
| 25db3c32def822fdfd8d57913da92f25 | 3 | 0 | 0 | 0 |
| 8198b9481675fedb7de0b961dad39409 | 3 | 0 | 0 | 0 |
| 854c09fff5174796060a52eba59df289 | 3 | 0 | 0 | 0 |
| 0ddb8d72b56351d3a9411a91afadb61d | 3 | 0 | 0 | 0 |
| 5f10198c84a709d60c0f929a4c04fca8 | 3 | 0 | 0 | 0 |
| e3c9fb3f632691e3999482c4b039b2c4 | 3 | 0 | 0 | 0 |
| 4a85b293cf0d0bb63bf178cc3b924aa6 | 3 | 0 | 0 | 0 |
| 48c595a97284222e2c146d76af7feac3 | 3 | 0 | 0 | 0 |
| 70bcba623c0bddf0deb41d3db6838109 | 3 | 0 | 0 | 0 |
| 7405d123dd0f8e38219fd3253a139263 | 3 | 0 | 0 | 0 |
| 1f761f3bfac88359f37e907c8a9f49ce | 3 | 0 | 0 | 0 |
| 2f611050a60cc6018ca424bd56f6f39b | 3 | 0 | 0 | 0 |
| 2006035d101ffa28b3ef009f01a33652 | 3 | 0 | 0 | 0 |
| d0a196fe3fd69afe692cba24698c9e54 | 3 | 0 | 0 | 0 |
| c9eaeced4f92550cddd5a03a9f551e18 | 3 | 0 | 0 | 0 |
| 5190ab65c936d0d05d45d39785144f0a | 3 | 0 | 0 | 0 |
| 6b86a267f9c6dc3f0139cb65712a17bb | 3 | 0 | 0 | 0 |
| fac568c8fb79efe6445b52d7aea9a406 | 3 | 0 | 0 | 0 |
| 52874ac9ab6aeb45d0380ed9dbfd26a8 | 3 | 0 | 0 | 0 |
| c87027f018d55b1853872b7a2e5bee13 | 3 | 0 | 0 | 0 |
| 2ee5a399407a87bf9d7143c5c37c81a5 | 3 | 0 | 0 | 0 |
| ccb13d736c99ec0f6e29f13f47978e15 | 3 | 0 | 0 | 0 |
| 110000179385b532cd3f53d8d1b4cbff | 3 | 0 | 0 | 0 |
| 3fb006c6e8eebeaaf6f39e6d5f88bf9a | 3 | 0 | 0 | 0 |
| 0960929244d4cbf45c225cae5ac5eb17 | 3 | 0 | 0 | 0 |
| ca2028bc7d88a780753daa1111f62cbd | 3 | 0 | 0 | 0 |
| 094a4c22b54c6750c889165c29c1a8c0 | 3 | 0 | 0 | 0 |
| fde61b49e7a062898ee19e19b7fac078 | 3 | 0 | 0 | 0 |
| 451c9efc6ba3c2bd11b70c02a0a6f73a | 3 | 0 | 0 | 0 |
| e3a4fed65f7683df0c8fd7b9fb2ae64a | 3 | 0 | 0 | 0 |
| 61c010a2870835a4694e0334c30d73db | 3 | 0 | 0 | 0 |
| de80b1f2ca384c6bc38accdebfe46b32 | 3 | 0 | 0 | 0 |
| 78d94a52eae93e843d98affb4677ade4 | 3 | 0 | 0 | 0 |
| 7a79093165d22d7c6b2a591bfcc9350d | 3 | 0 | 0 | 0 |



|                                   |   |   |   |   |
|-----------------------------------|---|---|---|---|
| d68c459fc0f64e74f86efbe94c24b2af  | 3 | 0 | 0 | 0 |
| 0cf66d17b75a91502859652ef83d5c4d  | 3 | 0 | 0 | 0 |
| 73658f043854344c98b841f4d49b1af7  | 3 | 0 | 0 | 0 |
| 766cb25e3bc9be91ac09b28544b92a1e  | 3 | 0 | 0 | 0 |
| 1dd5a1052d104641e1fac4a4b4c3be6a  | 3 | 0 | 0 | 0 |
| ad7cf95e95a97694cd0f0596c1683c6f  | 3 | 0 | 0 | 0 |
| 604cd1dd2ca97a1e534569c6f23dc3cd  | 3 | 0 | 0 | 0 |
| 31aae64be109cf333a389be8e5bd61e0  | 3 | 0 | 0 | 0 |
| e0cfce0b74d741dadfe5d8995438511a  | 3 | 0 | 0 | 0 |
| 6ea63e3efc3759ed8dbf561b7be931c2  | 3 | 0 | 0 | 0 |
| b8345cd9c60f49487dc452187a28aa30  | 3 | 0 | 0 | 0 |
| 9612b0e99bda2e3492405572361b9ad8  | 3 | 0 | 0 | 0 |
| ec73ad7430eef2ad0d93d3d0bf9c5c46  | 3 | 0 | 0 | 0 |
| 5a8d16b4ae9c588c30d8b94d80cfdba0  | 3 | 0 | 0 | 0 |
| de3566bc207040d44f550cb5fdf6ba03  | 3 | 0 | 0 | 0 |
| 0ce8c3e73c836e7fabcb89beb9fca9411 | 3 | 0 | 0 | 0 |
| 6fadd59e1cb05cddb355ec10a1d39116  | 3 | 0 | 0 | 0 |
| 5c5e81ae677f6b3317b8e8c62c7070ae  | 3 | 0 | 0 | 0 |
| be7dea45ff5a96538da64dfab665a66c  | 3 | 0 | 0 | 0 |
| 9b669223448e60cd0045c0f222742971  | 3 | 0 | 0 | 0 |
| a43bae594551b36e1be966b23a322868  | 3 | 0 | 0 | 0 |
| 781f8bd8f9ff05f98dcb49b737d54f08  | 3 | 0 | 0 | 0 |
| 1db5a8cf9aa7ec50227d5bde1ae79651  | 3 | 0 | 0 | 0 |
| 71c30efb5f7441844bf029d6fc8bff05  | 3 | 0 | 0 | 0 |
| 43bcb6e999e969e345f7ac39c39de240  | 0 | 0 | 0 | 0 |
| 46635ea6aba72fb117a9082944f301c7  | 0 | 0 | 0 | 0 |
| 199a17d667f850c5ff54d54571ea137f  | 0 | 0 | 0 | 0 |
| 32daed3aebccc4fbbb56e9bc9921d686  | 0 | 0 | 0 | 0 |
| 313a3a203fcfcd05c6104239a21e6334  | 0 | 0 | 0 | 0 |
| 29b0e55b1d5497129df426e2a0027fca  | 0 | 0 | 0 | 0 |
| 400cc7011ebbebefe102f1fec6217f82  | 0 | 0 | 0 | 0 |
| 2f06d45649ae233f68f9c4ca014bd2ed  | 0 | 0 | 0 | 0 |
| dcacee07fc45f7c0fc78455f0104169f  | 0 | 0 | 0 | 0 |
| 75253a92028e8bcff225ae31708f732f  | 0 | 0 | 0 | 0 |
| 7a684874592cbc3a0180232e6681deac  | 0 | 0 | 0 | 0 |
| 55ba92bb8120e621b7a955caa776bc5c  | 0 | 0 | 0 | 0 |
| cc336ff0eaae458377cc018ae4959b5f  | 0 | 0 | 0 | 0 |
| 12a2bd6ea1b637896587ff2597b215da  | 0 | 0 | 0 | 0 |
| 38f779a915bedaa1230d0e159b89c62a  | 0 | 0 | 0 | 0 |
| 02f1fa574104cccc1d1236eaa0fb8af9  | 0 | 0 | 0 | 0 |
| 90a811aa9e5be3e26fdae6ccc6b8518e  | 0 | 0 | 0 | 0 |
| d9ef4ae1cffc2bd1574f2a4ce0460990  | 0 | 0 | 0 | 0 |
| 16f549135cc6ab21a5326410e310cc01  | 0 | 0 | 0 | 0 |
| e36700e661333648d5eb8035cb7e5093  | 0 | 0 | 0 | 0 |

|                                   |   |   |   |   |
|-----------------------------------|---|---|---|---|
| 2384c4fd46359ce896f7a1a95ad62a8c  | 0 | 0 | 0 | 0 |
| ff8e93abc8e509529aa5826414c067e1  | 0 | 0 | 0 | 0 |
| 192aaaaee6d3859c1d77b020e0a35a6d1 | 0 | 0 | 0 | 0 |
| d6f98027f1c41dc79f1c3e192ee5950b  | 0 | 0 | 0 | 0 |
| fadb6a291cfd2fddaf65d146f3ea80b2  | 0 | 0 | 0 | 0 |
| 3deddfeeeac895d0b8c9a5d0c3938d6   | 0 | 0 | 0 | 0 |
| ecbab7a25d478de43b3dca7b7626a0a2  | 0 | 0 | 0 | 0 |
| bc3dd8f0b75b878d9a01a086fa59fda9  | 0 | 0 | 0 | 0 |
| 9a5332a9526db31695c3432fec629c6a  | 0 | 0 | 0 | 0 |
| 521edc658ea74973ccbdaaff43988db21 | 0 | 0 | 0 | 0 |
| 0018b2b9b03b195f7d1f6ca5f6ab1e97  | 0 | 0 | 0 | 0 |
| 22192ffc1ddb44a52134d3e47edc7742  | 0 | 0 | 0 | 0 |
| a7132412471a09f883e6700c8788161a  | 0 | 0 | 0 | 0 |
| a358b5980580b825e518369bb6a8c607  | 0 | 0 | 0 | 0 |
| e9e555f4a35fc20aed16bd0f2b472681  | 0 | 0 | 0 | 0 |
| 2ef8fc06767634afc6f7bda39b414b2a  | 0 | 0 | 0 | 0 |
| e258b78f0774842cc07b7c1a9da92359  | 0 | 0 | 0 | 0 |
| c2aa2ede2daae66260f273a860649e55  | 0 | 0 | 0 | 0 |
| 731ed41e787172f499e6bd91a954b8e2  | 0 | 0 | 0 | 0 |
| 62dd170406798457f54d36dff8736209  | 0 | 0 | 0 | 0 |
| e7d53704283e1abf60844000ee297574  | 0 | 0 | 0 | 0 |
| 026452cb92de63310888f2e24678f176  | 0 | 0 | 0 | 0 |
| 6729958dd9ec21415a1032f2d88d3ecd  | 0 | 0 | 0 | 0 |
| ce859b714dd82a3eba477d944d01bf4f  | 0 | 0 | 0 | 0 |
| 1937e08e5568cd0dbc5b7c01930ff3aa  | 0 | 0 | 0 | 0 |
| da02749bb3f3c292eb9e2d024f383b75  | 0 | 0 | 0 | 0 |
| 02c8c3c123823bbbc3fe7f6f8f3bd94d  | 0 | 0 | 0 | 0 |
| 4e202bd05377014f9488e1381cf944ff  | 0 | 0 | 0 | 0 |
| 83a0b72e452fe5b2e0284c8ab1ef9b3c  | 0 | 0 | 0 | 0 |
| 692282daca08de11ac23fa96de24e46d  | 0 | 0 | 0 | 0 |
| 58c4c8f6fb1ba808de7a8ba9c38796f3  | 0 | 0 | 0 | 0 |
| be1f5e617b9e91aae9a4cd4103969370  | 0 | 0 | 0 | 0 |
| fa6f81c49b626c44023be68a4bdac75e  | 0 | 0 | 0 | 0 |
| 733009cd2a421cb29a9e5dcd436d8ea5  | 0 | 0 | 0 | 0 |
| f2453defb95689503e160490d14d538e  | 0 | 0 | 0 | 0 |
| a36990caddac8638ce46b781e427b05b  | 0 | 0 | 0 | 0 |
| 774d5d1a365e290061e92024bb115bf8  | 0 | 0 | 0 | 0 |
| 56df70e4e80f160eb29b6deb0cb9dab0  | 0 | 0 | 0 | 0 |
| 386bdfa81af44c15899ac117e25058e2  | 0 | 0 | 0 | 0 |
| d77a080fcc6f3ba4de568560c81c9fe0  | 0 | 0 | 0 | 0 |
| 1799c472e73dc7d65a36f5adb09177c8  | 0 | 0 | 0 | 0 |
| 79a8abebc68365addf1d3c093d644f3b  | 0 | 0 | 0 | 0 |
| be2b96dd8fffe2eb3b2484ae5f3e9079  | 0 | 0 | 0 | 0 |
| 2c793a17aec4228ad243b21d92db6934  | 0 | 0 | 0 | 0 |

|                                  |   |   |   |   |
|----------------------------------|---|---|---|---|
| 9a661cca0342a2c4169020b019f674ef | 0 | 0 | 0 | 0 |
| 274c5d8f458bf76317e7bc4ca5645299 | 0 | 0 | 0 | 0 |
| 98adfe02a24568265e6b7855eabf323d | 0 | 0 | 0 | 0 |
| 81c4e612461d3fb506e644104f6a2ae2 | 0 | 0 | 0 | 0 |
| 2e7f029a4572516e6efbc3c1582f6e44 | 0 | 0 | 0 | 0 |
| 7decbc3cd51de9eae5747c5ada09c043 | 0 | 0 | 0 | 0 |
| 473a97d9055dc87143cd42522825f286 | 0 | 0 | 0 | 0 |
| 003750af310bb978341de1f93374c9ab | 0 | 0 | 0 | 0 |
| 94abc80e2a6da311d2d50a1d6dccd7c1 | 0 | 0 | 0 | 0 |
| ed7873309e289481bc5e98a3cf07aaf5 | 0 | 0 | 0 | 0 |
| bdf6cc9b7d0142de5f2b0a883dd2bf3e | 0 | 0 | 0 | 0 |
| 804e58a88dee8a5ec2c10a0daa7c5851 | 0 | 0 | 0 | 0 |
| 4e1af60134a613ebd12515ff5fe6ea2b | 0 | 0 | 0 | 0 |
| 51ca52fa90b7276e071b93fd75d0ffb9 | 0 | 0 | 0 | 0 |
| 82cb3fab96228635be8925009a178e3b | 0 | 0 | 0 | 0 |
| 597e0bf887d4bf25ac800160240a4103 | 0 | 0 | 0 | 0 |
| fdce9c45bb0b851ac38ba1472be2f12a | 0 | 0 | 0 | 0 |
| 2e06d2939dc994508c42e0b4e4769212 | 0 | 0 | 0 | 0 |
| 4ce3cad9692179daa1cbca399409d3e5 | 0 | 0 | 0 | 0 |
| fd750e3a6d1bd722507cdc2357c1f5f5 | 0 | 0 | 0 | 0 |
| 9a1082f93ebb3e317843c105c138b80c | 0 | 0 | 0 | 0 |
| 054d0c69afe692bb2ac2ec21993f5ec8 | 0 | 0 | 0 | 0 |
| 0095178039af36a2dac92e384d8d3db3 | 0 | 0 | 0 | 0 |
| 0fd1a64ac33b2d12d2e2a4ba4eded70e | 0 | 0 | 0 | 0 |
| 240652cf187815f2c722d2ecd989206a | 0 | 0 | 0 | 0 |
| 5bc6a67bc4fc8a01bdb46330943a97f5 | 0 | 0 | 0 | 0 |
| 1f15eae84e74c2c770f86b26f4daca28 | 0 | 0 | 0 | 0 |
| 2fa7865fd1873e802a8d22600d4d7a25 | 0 | 0 | 0 | 0 |
| be1d091f9f52f5d61bb248a5e210dfb5 | 0 | 0 | 0 | 0 |
| 3599de5cc7680ea83cd37784574cfb5b | 0 | 0 | 0 | 0 |
| ef47f02f1d08edfc5030bcb932bd9366 | 0 | 0 | 0 | 0 |
| 68f1c5381143f68ac267ee7fa2e47293 | 0 | 0 | 0 | 0 |
| 16a52f22e21754cb7654bc4bd5190f0a | 0 | 0 | 0 | 0 |
| 68b44dda69703d7eefbc7d566093b15  | 0 | 0 | 0 | 0 |
| eefe055869bc60cc0d2340e71cc9348d | 0 | 0 | 0 | 0 |
| 2577163cada9e59f3a659214df53e71c | 0 | 0 | 0 | 0 |
| ebdad182007b29f828409f2218da27ab | 0 | 0 | 0 | 0 |
| 6b0484ddca3623619ba1532ab62a0e46 | 0 | 0 | 0 | 0 |
| 7dd17f5e39c2317e217ea524740b19d7 | 0 | 0 | 0 | 0 |
| 0cc01d26d9a75a1c71bc7129c2dd49a1 | 0 | 0 | 0 | 0 |
| be8d127a2bde9e897a9cc22c730e0a97 | 0 | 0 | 0 | 0 |
| ac0d299d911e9ef5655bfd3e493842bf | 0 | 0 | 0 | 0 |
| 8f790ba68819e1e7a035ffe6b7d5826d | 0 | 0 | 0 | 0 |
| 7f678a0197a88f12dfa71b91a1a28a1d | 0 | 0 | 0 | 0 |

|                                  |   |   |   |   |
|----------------------------------|---|---|---|---|
| 0eca4237a424ce140454e905b9d685ac | 0 | 0 | 0 | 0 |
| 09ae10288a8fbb755723d01b9f3b3e0e | 0 | 0 | 0 | 0 |
| bb8cb1d427ef087979a8076f17915498 | 0 | 0 | 0 | 0 |
| 1de461e5746da3f37b1d8781fecb7aee | 0 | 0 | 0 | 0 |
| 1c5bf25e8174f46c924a576fc430309a | 0 | 0 | 0 | 0 |
| 6a66c1cca92a3f74d82e8efd9ca28ab4 | 0 | 0 | 0 | 0 |
| 701ec9b52e13ca8760f5fec143601b7a | 0 | 0 | 0 | 0 |
| 9ba807d011a295de90cd98683bc813ee | 0 | 0 | 0 | 0 |
| abda9b4575a9cd357488981ff19e4030 | 0 | 0 | 0 | 0 |
| 65881d38fe0b49ea170d8717f763ef6a | 0 | 0 | 0 | 0 |
| e068f4c40cdf57712104da20f2a5f6cc | 0 | 0 | 0 | 0 |
| 8d61389e3629f6168e83301a0616360e | 0 | 0 | 0 | 0 |
| ad8c1ea7275bc6e48989b11d3269aa4b | 0 | 0 | 0 | 0 |
| abfb02fa757036b475c189cd433b9cf3 | 0 | 0 | 0 | 0 |
| 8cc357205ab5e046207238d8b81b56ac | 0 | 0 | 0 | 0 |
| 878be9b9948a3eba6818a14f5b8a0adf | 0 | 0 | 0 | 0 |
| 178d30ddc6eb1d638864b417b4a84a5f | 0 | 0 | 0 | 0 |
| dd4f112ea1174f42d68caddedd02a97c | 0 | 0 | 0 | 0 |
| bb37c83368951ad6fc3b3e96f164a57a | 0 | 0 | 0 | 0 |
| 7ad758151b9fbc53abf714bf10c40ae7 | 0 | 0 | 0 | 0 |
| 6d7c024755abaa1c7eeeb1d1ac290146 | 0 | 0 | 0 | 0 |
| afa6b1b4343bca46fb9bb9717a7d352e | 0 | 0 | 0 | 0 |
| 523c68045e957b0d1c9a55fcc244543a | 0 | 0 | 0 | 0 |
| 9c94297e0345653f5ce3b933fd588c6f | 0 | 0 | 0 | 0 |
| 96e8c0664309d90c9eaec91642ca04ef | 0 | 0 | 0 | 0 |
| fda0bd602b3d9f3bbc8593d3a2f61c85 | 0 | 0 | 0 | 0 |
| 6f337010187da734119962d2d252e431 | 0 | 0 | 0 | 0 |
| 565da88b777c0ce15e406c027d9f230a | 0 | 0 | 0 | 0 |
| f3f2949df3d57f4f1ad9845b4ddb06ae | 0 | 0 | 0 | 0 |
| 0b06e49790c2a8fc34464d792b98d292 | 0 | 0 | 0 | 0 |
| 745d2ed1a6919c0ca57bff1c98e12eb1 | 0 | 0 | 0 | 0 |
| 94d1434f7c805bbba238ea7be195dc99 | 0 | 0 | 0 | 0 |
| 25f04bc7446875cbf06a054fd2ee1dcb | 0 | 0 | 0 | 0 |
| 1a9eec9ea63eb66e56654ba2766dc302 | 0 | 0 | 0 | 0 |
| 065ed8dcf1dc2715688e8a10b5df6b7d | 0 | 0 | 0 | 0 |
| 9d4c34a91ddad598cf25d3d2d08c7e1d | 0 | 0 | 0 | 0 |
| 3d9b7170921cf374ffebd35f052cb402 | 0 | 0 | 0 | 0 |
| 2ba4af3b3a56bf143469fb310d477a64 | 0 | 0 | 0 | 0 |
| 8bee1e4ca896ffcfa72758096a57e2c8 | 0 | 0 | 0 | 0 |
| 5ed2e752519f209880bfc7f84b812058 | 0 | 0 | 0 | 0 |
| 9f689752799eb69c48dd73658f25c3ba | 0 | 0 | 0 | 0 |
| eead9f99bc5e946a4a76d9917609ef43 | 0 | 0 | 0 | 0 |
| 639add38eacf6d8fdd9a3053d5f185d1 | 0 | 0 | 0 | 0 |
| ce23d28c14bd6bf0309d3c787f596523 | 0 | 0 | 0 | 0 |

|                                   |   |   |   |   |
|-----------------------------------|---|---|---|---|
| 7d2944be23401d82201d910b1fe2627d  | 0 | 0 | 0 | 0 |
| 715c3fb16d007ae1d0b1dd9fb6b6f040  | 0 | 0 | 0 | 0 |
| f89f79608ca3231083fa7397e8467c63  | 0 | 0 | 0 | 0 |
| 93834d568496d4830e3e174942ae7884  | 0 | 0 | 0 | 0 |
| cc435869b160f1b506e5fe87f1973e80  | 0 | 0 | 0 | 0 |
| 12dfecc2f89e544965707610fff2f8ae  | 0 | 0 | 0 | 0 |
| b29e7dd02662f4c80d9ca1d010d871bb  | 0 | 0 | 0 | 0 |
| 6faedbed04d167bcfee87798d02cae4d  | 0 | 0 | 0 | 0 |
| bf2da182cce6ecc47d3c95df30017f66  | 0 | 0 | 0 | 0 |
| 82a48197b69295873322566bc03943bb  | 0 | 0 | 0 | 0 |
| 5704d081dd5656e8ea546fac83b3ebf6  | 0 | 0 | 0 | 0 |
| 69479b509ffb738f898ebf1cb2f20753  | 0 | 0 | 0 | 0 |
| af77b8705bf7041e408c564d4e71636f  | 0 | 0 | 0 | 0 |
| 7b61c4801b4c7a9ac9bfcaa68d12ae95  | 0 | 0 | 0 | 0 |
| a4ab537e1216484bc32de077efb25b7d  | 0 | 0 | 0 | 0 |
| a8afb6f5b3646fbfb0579594f6143b11  | 0 | 0 | 0 | 0 |
| c23dd2c2f3cee652b10722a4b19b22bc  | 0 | 0 | 0 | 0 |
| d9c7432ddb4113badd5a0c2381b91261  | 0 | 0 | 0 | 0 |
| 817d8ef634e4f73df9ac36bc13bdfe73  | 0 | 0 | 0 | 0 |
| 394175b312e5fa30fe2c6964bf9343fe  | 0 | 0 | 0 | 0 |
| caff6d0de956d2c8f0da770f06d79af8  | 0 | 0 | 0 | 0 |
| c439d847649f8dc0ee183d1bdb2ea957  | 0 | 0 | 0 | 0 |
| 743a8163d201f4b2d3569752cd2536e3  | 0 | 0 | 0 | 0 |
| 54322362b78614a72a8e7c8161febc31  | 0 | 0 | 0 | 0 |
| fa3b854b837ecad9e5454e07fa36c5f0  | 0 | 0 | 0 | 0 |
| 00b26974e0835d06709870c1ac9694fe  | 0 | 0 | 0 | 0 |
| 52271e650408d215587be9cf2f4b96b5  | 0 | 0 | 0 | 0 |
| c654f67f8356be01fa34e63b21e19a01  | 0 | 0 | 0 | 0 |
| c09e3aa3dc50a4ac3204b4789b472936  | 0 | 0 | 0 | 0 |
| aaa1ce8acc2c755a23a40c85e22c251a  | 0 | 0 | 0 | 0 |
| 3f7241ecb27f99c381a06de03389502e  | 0 | 0 | 0 | 0 |
| ef18476c3af3d8c90d153a965bc7d951  | 0 | 0 | 0 | 0 |
| 4692f6005836b3534b7a01c4abd5f886  | 0 | 0 | 0 | 0 |
| 4aa3ca57803e1db0fb66f05aabcfc3da7 | 0 | 0 | 0 | 0 |
| 52f553250b0308dcf4ed037653394b31  | 0 | 0 | 0 | 0 |
| 786281aadee3066648d948ef43a0ea37  | 0 | 0 | 0 | 0 |
| 0fa319a78196596d0bab945f0f8c6669  | 0 | 0 | 0 | 0 |
| 44ce71a159bdd75c24fff998f7d55c09  | 0 | 0 | 0 | 0 |
| 23fc67b9fdfe75e11ee9d24ef41a1fad  | 0 | 0 | 0 | 0 |
| cb0a66b9eb18b072b1d571975a2bd959  | 0 | 0 | 0 | 0 |
| 0484daab266d45757c96c6ff64992e70  | 0 | 0 | 0 | 0 |
| 15a8191e5acd818281c2e3876e9d46e7  | 0 | 0 | 0 | 0 |
| 200f108efe176ac73c4e3f7197b2a941  | 0 | 0 | 0 | 0 |
| 3b2a5d7aee797fc1bf9b07b24277e467  | 0 | 0 | 0 | 0 |

|                                  |   |   |   |   |
|----------------------------------|---|---|---|---|
| 4b6758f4d69ba205a20618433c6dc5ef | 0 | 0 | 0 | 0 |
| 6c9d8219079b16c14c8382a127db1a8c | 0 | 0 | 0 | 0 |
| 2eecde2b7f4644415eac048604b9a2ec | 0 | 0 | 0 | 0 |
| 49888d4cae9774d4614167aceecb75e2 | 0 | 0 | 0 | 0 |
| a9fe062a7a627c670f3c4a35fb605448 | 0 | 0 | 0 | 0 |
| b4313187bfac0a47918db3c800c9924e | 0 | 0 | 0 | 0 |
| 9e0b26e7d353b2279b409fe50ec08ded | 0 | 0 | 0 | 0 |
| 11f88a70eac9b55da239c2a7ccee18e3 | 0 | 0 | 0 | 0 |
| b6daf99693ce60e07723f85f2c99bfd4 | 0 | 0 | 0 | 0 |
| d7c489c8e8cc91dfa172493499f447e4 | 0 | 0 | 0 | 0 |
| a2451b5b81cbfd3c9dbb2da3bfd1cfc3 | 0 | 0 | 0 | 0 |
| 5ffa1475d879cb87a8c516c9da9998ad | 0 | 0 | 0 | 0 |
| b9ed6a3473da3be252dd1583995fe1f6 | 0 | 0 | 0 | 0 |
| 6a57daf41e8f6bee5e67a662758d2a04 | 0 | 0 | 0 | 0 |
| b613e7d62c234197669cfaae3b2f8e5a | 0 | 0 | 0 | 0 |
| 16b46efc025e3eb7ecafeec70ef47bfd | 0 | 0 | 0 | 0 |
| 80eccf9168690996fa1f015dc6f866ad | 0 | 0 | 0 | 0 |
| 62410de3b827bb0c36991b6e1f552209 | 0 | 0 | 0 | 0 |
| 745680bb716ba6702d38dd1f8763ba20 | 0 | 0 | 0 | 0 |
| 9e72bd468983236ccdadc2856574f15  | 0 | 0 | 0 | 0 |
| 864539fbda34673596e98c18d87c6b3a | 0 | 0 | 0 | 0 |
| 279fe1d2433ad524d02a697fc4deea87 | 0 | 0 | 0 | 0 |
| b96983916578363a165a74d7377c79c2 | 0 | 0 | 0 | 0 |
| ba577bcf609166e0cb7a2310917d2dba | 0 | 0 | 0 | 0 |
| ad41cc2e1ee27e81d4b68cc70043d63b | 0 | 0 | 0 | 0 |
| b045812f3c0830795ae515a8bc801518 | 0 | 0 | 0 | 0 |
| 503357e8ed5b1dc634ed63bf11f02654 | 0 | 0 | 0 | 0 |
| 1bf1ee4ff2a1bdac55b95f15319a4c34 | 0 | 0 | 0 | 0 |
| 676cd7e5cfc681b3c6e4f1c6b7902c5f | 0 | 0 | 0 | 0 |
| 74aba6508e89a86eeb552b0e40ad9d7c | 0 | 0 | 0 | 0 |
| 2bd3f3d4f839bc0db9a7d04980bfbf1e | 0 | 0 | 0 | 0 |
| 72f5a61110dfef350a37471e42fa4349 | 0 | 0 | 0 | 0 |
| 587484e5901af434fe691e469837b96e | 0 | 0 | 0 | 0 |
| 2c799ea226686a4dc05421d9f9810bf3 | 0 | 0 | 0 | 0 |
| 3d52fd4167f42183d1f013b33f872e8f | 0 | 0 | 0 | 0 |
| c935eeae307ab8dab1c50e6636b78daf | 0 | 0 | 0 | 0 |
| 148b672a14c61839fc9a958ca3efefe0 | 0 | 0 | 0 | 0 |
| 52ac3bcd7ae3d2dcd85bd10e187f06b3 | 0 | 0 | 0 | 0 |
| a06277176c31eead3fb5e2cc4614d729 | 0 | 0 | 0 | 0 |
| 270fe59574013ae7d38e38bbf68b8cf8 | 0 | 0 | 0 | 0 |
| bce20c0463972a1e4a653ad22b02f67c | 0 | 0 | 0 | 0 |
| 461136db40473545e38d9081201cae03 | 0 | 0 | 0 | 0 |
| b2d85f80b1eeea349f8f16b9650b03c9 | 0 | 0 | 0 | 0 |
| a40eb87871f1b8afdd263551804dcb02 | 0 | 0 | 0 | 0 |

|                                  |   |   |   |   |
|----------------------------------|---|---|---|---|
| 53dd7441a927c9c36fd0b9efaa03c415 | 0 | 0 | 0 | 0 |
| c500eb8ed83dd24e66ce469bbc7ec0d3 | 0 | 0 | 0 | 0 |
| 97dc3b2e904c43722b25e45e3bcb4fb4 | 0 | 0 | 0 | 0 |
| c21efaf9eee2f7e8fab75b334d833b27 | 0 | 0 | 0 | 0 |
| 82c3ab454807612ef27ea36749003b4f | 0 | 0 | 0 | 0 |
| 5da5ae194341da09faf147eee5fbcc95 | 0 | 0 | 0 | 0 |
| be3b72d88b1b937538faeac251884330 | 0 | 0 | 0 | 0 |
| 2c6d6e7e150c69141469212bbb261dbe | 0 | 0 | 0 | 0 |
| 98a8c5c3ed76c960970ae1c3bfad2b8b | 0 | 0 | 0 | 0 |
| bc94d8636ecd65a1fb7aff54ce124e0b | 0 | 0 | 0 | 0 |
| 47d6b13b2bf799a24457a9d078ef8ffe | 0 | 0 | 0 | 0 |
| e441b13fb0d9ad6e611f98543bd2df9c | 0 | 0 | 0 | 0 |
| eee830b133fb6ca68b35caed770c60cf | 0 | 0 | 0 | 0 |
| a1821438f181c21cb3c49383c9366605 | 0 | 0 | 0 | 0 |
| 91568098e309a1d0e5b85da72fb9d782 | 0 | 0 | 0 | 0 |
| 7a98a35e7c784cd8cc93d7f4796bb645 | 0 | 0 | 0 | 0 |
| d7902886e68b896241e4c0fe3dcdb83f | 0 | 0 | 0 | 0 |
| f0c45247f7714e7f4bc81203c5428c22 | 0 | 0 | 0 | 0 |
| eeccb098ff35ac79aa2d3b5c865e6a2a | 0 | 0 | 0 | 0 |
| 0c411c0350f9315f6432ece469d3a16b | 0 | 0 | 0 | 0 |
| 63140dd27dc77acb9dd33be1b82bd302 | 0 | 0 | 0 | 0 |
| c6a701e9623b9f8706fee8d6ed11e3b1 | 0 | 0 | 0 | 0 |
| 0bcda5ef6ef8880b80626c0c0bef7725 | 0 | 0 | 0 | 0 |
| 84f96eecf6223208d2f9afc2c0d6b2c6 | 0 | 0 | 0 | 0 |
| 871f18d5acef752b5cd28eeee978503e | 0 | 0 | 0 | 0 |
| 92f30623c5795396347a612771be6a82 | 0 | 0 | 0 | 0 |
| c6419a2eb83c637b38a54ff44bb7f972 | 0 | 0 | 0 | 0 |
| f54301c022773032e8081749098db4bd | 0 | 0 | 0 | 0 |
| ce0e2db041ae96e88a826427ae94f8fb | 0 | 0 | 0 | 0 |
| f70ed1b9d5abe3daa6a87c28875f3711 | 0 | 0 | 0 | 0 |
| 7ea821e87d2052e8b0c59e1ced23a0e8 | 0 | 0 | 0 | 0 |
| 7c130b09e5ca142f88a17705cc36d1a7 | 0 | 0 | 0 | 0 |
| d6ecfd80d45e7c45ebac1ef74f185d9a | 0 | 0 | 0 | 0 |
| fd65fc34b050e0ecc7c32cb0d06e6e1  | 0 | 0 | 0 | 0 |
| 766415f17701d69a479a0f523142cb5e | 0 | 0 | 0 | 0 |
| 0c4a437a69a8e869ffbb256c6a5af211 | 0 | 0 | 0 | 0 |
| 174061839282d60f00c5f2163b451659 | 0 | 0 | 0 | 0 |
| f5cefb2cb0a7e9dba62d2750b934ee70 | 0 | 0 | 0 | 0 |
| e425721b93c9549348c0b5676a9be610 | 0 | 0 | 0 | 0 |
| 457981092d25a4da2240fd174e6203ce | 0 | 0 | 0 | 0 |
| 32c9f0f354e8d05bce207df6cdb186e  | 0 | 0 | 0 | 0 |
| 9ccf4678a032f6077b1323ac5966ae79 | 0 | 0 | 0 | 0 |
| ef119cdc25e98497fdb4e68acad60ed  | 0 | 0 | 0 | 0 |
| 4498d9532640a7206511297a4c22e235 | 0 | 0 | 0 | 0 |

|                                  |   |   |   |   |
|----------------------------------|---|---|---|---|
| 6760dba526538b4dba5144ab556ead3a | 0 | 0 | 0 | 0 |
| f450119ce7661d47a5d9c0cd5034c86d | 0 | 0 | 0 | 0 |
| 3d8b73477522248cd8ea84f5dcf26325 | 0 | 0 | 0 | 0 |
| b7a6dd5b98013e87f5709b807dcc3270 | 0 | 0 | 0 | 0 |
| dd70660931b449af9ca53a7a483057a3 | 0 | 0 | 0 | 0 |
| 2d6b9d4bb13fc0f587bf59f2a1ba0e7d | 0 | 0 | 0 | 0 |
| 328ad4879635d4ae59a2fedc3f21c1cd | 0 | 0 | 0 | 0 |
| 563af579989698c73662c3390196245e | 0 | 0 | 0 | 0 |
| 63acae7a5306f19af55774fd6830e26c | 0 | 0 | 0 | 0 |
| 68698097eff802e8a7a02c51293cb9b6 | 0 | 0 | 0 | 0 |
| 28b038f2d54001d6f0f88cbfb88150eb | 0 | 0 | 0 | 0 |
| 862834c0ac2070928d786c046227b72a | 0 | 0 | 0 | 0 |
| 0b5aaffbccd976e2c0e4224c98ff490e | 0 | 0 | 0 | 0 |
| 694d55375715709ed0a0999007b56b68 | 0 | 0 | 0 | 0 |
| 392d91865269cea25c05a0d169d8514b | 0 | 0 | 0 | 0 |
| 0856d2f7f01e999da563f64831c6a912 | 0 | 0 | 0 | 0 |
| 2bf030d12d04b23905d95274a4a5beb7 | 0 | 0 | 0 | 0 |
| 49c96e706758c9aa901ee0cc6b67769e | 0 | 0 | 0 | 0 |
| ef2a64d73295da3b21c276d93fad8161 | 0 | 0 | 0 | 0 |
| 1fedda2bc316ebb0dc857cc232981a59 | 0 | 0 | 0 | 0 |
| 8591f5c4a39c4590a28046921db40a0f | 0 | 0 | 0 | 0 |
| ff16cce32c1c49c971ad7aa564abda91 | 0 | 0 | 0 | 0 |
| 466d71c1143943a111c71a171b9bc763 | 0 | 0 | 0 | 0 |
| d967be695208782d9d92052db9b66fa0 | 0 | 0 | 0 | 0 |
| e2e2b0a24afa829db4965569ce33dd96 | 0 | 3 | 0 | 0 |
| 7f7d7c4f775235f0c89cafe1f94cd01b | 0 | 3 | 0 | 0 |
| 5e48b8a21493b096a27745d594480071 | 0 | 3 | 0 | 0 |
| 6509a2b621bf539cc779f01157b78838 | 0 | 3 | 0 | 0 |
| de2ad41e906ef4c6c5be623b9e90878d | 0 | 3 | 0 | 0 |
| 1d74224eb214b6e048c5662592468932 | 0 | 3 | 0 | 0 |
| 6afe5678ce2668dce63c3e79490369fb | 0 | 3 | 0 | 0 |
| f3273e1d29c31be8a504c7f629e5c4fd | 0 | 3 | 0 | 0 |
| c63deba30f42d74dd979319b83f6743e | 0 | 3 | 0 | 0 |
| 491dd980ece5b0af0ef5601adb1a52b2 | 0 | 3 | 0 | 0 |
| ed6c454805377a681a9706960c9a9817 | 0 | 3 | 0 | 0 |
| 8a2ca3638d695f1d03edf6ef4ee9393f | 0 | 3 | 0 | 0 |
| ca50ab276b81bf14153df3c828709977 | 0 | 3 | 0 | 0 |
| 4faa4e5bf263968dedbfc0d63fac07eb | 0 | 3 | 0 | 0 |
| 3662476d3c160151134882987c88773c | 0 | 3 | 0 | 0 |
| 966e0412022312a44e5ed0167dd1573e | 0 | 3 | 0 | 0 |
| 4f3385499b5e40d4f094547924bb8e51 | 0 | 3 | 0 | 0 |
| 5b0d9246b21364f3ca9ea0694c6cf61a | 0 | 3 | 0 | 0 |
| 7a61dfa24e5f07e3e4a80e84f9b90ff9 | 0 | 3 | 0 | 0 |
| 668002a5991016a90c164878b8a4bcd6 | 0 | 3 | 0 | 0 |



|                                   |   |   |   |   |
|-----------------------------------|---|---|---|---|
| d5b60a23f7d71aa8b472674e54643246  | 0 | 3 | 0 | 0 |
| eaff9ab403202600ed0db14769b384ad  | 0 | 3 | 0 | 0 |
| e2eced1519b30654d479a6670cd22888  | 0 | 3 | 0 | 0 |
| f5260f68516d707dbae38096fa406717  | 0 | 3 | 0 | 0 |
| 9b9b1b86692d8cb6809f32940c320a85  | 0 | 3 | 0 | 0 |
| 3fb278bc3d7e59016b076e907836df96  | 0 | 3 | 0 | 0 |
| dbf4894c142f34b36286f7489753e76d  | 0 | 3 | 0 | 0 |
| fb020f00ef0ae6384373e62efefbf997  | 0 | 3 | 0 | 0 |
| 825f2f6af74d36eb7892b17c19c7f596  | 0 | 3 | 0 | 0 |
| 1d6f75385357c805f8ee65150a4a636a  | 0 | 3 | 0 | 0 |
| cb3f09acf11b8027e2eece6f44a3beaf  | 0 | 3 | 0 | 0 |
| 9ceb32eb33a77575b1a7cc53b84cfb8b  | 0 | 3 | 0 | 0 |
| 3949bfa5345534be9c22ff18667203b7  | 0 | 3 | 0 | 0 |
| a57150a43d7ed9552d347a2bac2ebbeb  | 0 | 3 | 0 | 0 |
| 53cd147c8a5ebf84ccfeafa0169def881 | 0 | 3 | 0 | 0 |
| 4591173d87aae17724d9c0d6876f0669  | 0 | 3 | 0 | 0 |
| 5bc4c5945c594e308d8b76ec744fcdbf  | 0 | 3 | 0 | 0 |
| b65efaca44f87f5f48b6a052eeabcd05  | 0 | 3 | 0 | 0 |
| 938b3313d4b88f9916a032a806a6bc27  | 0 | 3 | 0 | 0 |
| 6c2c6762c81d2a1090c63eb954d3d461  | 0 | 3 | 0 | 0 |
| f85da4481bb129bf07231e55349f5fff  | 0 | 3 | 0 | 0 |
| b1123ac52acb335d18a285586f069f15  | 0 | 3 | 0 | 0 |
| 84ff57fd93f29f6e4f23b32887b123ba  | 0 | 3 | 0 | 0 |
| ebf9c5b00e0682a52dfd3e67a5ce4d74  | 0 | 3 | 0 | 0 |
| a614995e49084ab6e5cb7d21e30555f7  | 0 | 3 | 0 | 0 |
| 7478dfb7a9dc2f70b7f69740953c3212  | 0 | 3 | 0 | 0 |
| f1ea6fa84b7c24d8a75d30a1539662a7  | 0 | 3 | 0 | 0 |
| f0def9312921f5ff1d454614cdd90b9b  | 0 | 3 | 0 | 0 |
| c954cbfe7a106b31ae8d1c212bf04c57  | 0 | 3 | 0 | 0 |
| 7cb71601b139cefab81da9b3e7b80e24  | 0 | 3 | 0 | 0 |
| 9ed2e3bbf2e84286ce2032843e5cb4ea  | 0 | 3 | 0 | 0 |
| a346122796deffe35de791e3016049fa  | 0 | 3 | 0 | 0 |
| 08889c262e26ce4124e439af4f11e33b  | 0 | 3 | 0 | 0 |
| 6ddd2abc456ba7797cdabd1f88168334  | 0 | 3 | 0 | 0 |
| f615b6dc60425ccc24226ce03f6e6da5  | 0 | 3 | 0 | 0 |
| 97fc99c62cdc5b6cfae4a5f8ba169c31  | 0 | 3 | 0 | 0 |
| b81d0a7a6d28bfc711ecf2d3d7be576d  | 0 | 3 | 0 | 0 |
| fe7e721dac5e61dc8f0f2d6091b97a4a  | 0 | 3 | 0 | 0 |
| bc0c49d092c2bdf2db064d0239400fd4  | 0 | 3 | 0 | 0 |
| cc170518d2c9f0d571b9caa174214fe3  | 0 | 3 | 0 | 0 |
| 7b1c5729a10e33d1b07b42553fa5c910  | 0 | 3 | 0 | 0 |
| 60f7418c1f912eb5ba4999b0fc1e924d  | 0 | 3 | 0 | 0 |
| 99879ff04d246eccc06ff0442245dece  | 0 | 3 | 0 | 0 |
| e9a04301450d28081dcb3c7718ab819f  | 0 | 3 | 0 | 0 |

|                                   |   |   |   |   |
|-----------------------------------|---|---|---|---|
| 6cb56aff1ae214950584d5d259772cb6  | 0 | 3 | 0 | 0 |
| 2614e58b4fe6ff16c84b8ca7524756b9  | 0 | 3 | 0 | 0 |
| 7ef7bd88e96b8f99ec5a996d7ee61119  | 0 | 3 | 0 | 0 |
| 06ce610d81db7cf6b0cc82408da3a9a8  | 0 | 3 | 0 | 0 |
| b44e077e75a621381f530cade134105e  | 0 | 3 | 0 | 0 |
| 62b3ec0d907f756e03ab2cd2cacc8a10  | 0 | 3 | 0 | 0 |
| a6de0620c7fc8c46ba74a07ac340ccb8  | 0 | 3 | 0 | 0 |
| ffa769f585129db62cee60d3c6182582  | 0 | 3 | 0 | 0 |
| 209c756f2e2ec9d26c9bbe750c87a3cf  | 0 | 3 | 0 | 0 |
| aba6fde7e5fa3ecbca777f2afd6bae10  | 0 | 3 | 0 | 0 |
| 95a48bd1fff9044c3118319d10af96fa  | 0 | 3 | 0 | 0 |
| 82f8b7df55d2a44156a026ca186ba72b  | 0 | 3 | 0 | 0 |
| bfa0cac6702c2e38b35b73b4a9547484  | 0 | 3 | 0 | 0 |
| 4104a74b6f26b2c182ee088a21712ff2  | 0 | 3 | 0 | 0 |
| 8e3b27c2b78a2fb343e9cbb4b8d9bad1  | 0 | 3 | 0 | 0 |
| eda2fdcc7d6cbfe233062636237d93e1  | 0 | 3 | 0 | 0 |
| 4a4a6c3d1e6af0c6b46c6399cd9b879e  | 0 | 3 | 0 | 0 |
| 3bea71a24ccafd6efa6a3f10d2c3efb5  | 0 | 3 | 0 | 0 |
| 78efa38b68afab17111757035f59e1d2  | 0 | 3 | 0 | 0 |
| a01fb34abc237aeefb029bf1c1af737   | 0 | 3 | 0 | 0 |
| 68a7b7400870b021e04e3936a63b74a1  | 0 | 3 | 0 | 0 |
| c94954259e5ea52f5b21a1a308aaf015  | 0 | 3 | 0 | 0 |
| 440f50cf882bfeaf28d58fdfdfe624a7  | 0 | 3 | 0 | 0 |
| b7dc39ea3741558f2d5948d19230b7b9  | 0 | 3 | 0 | 0 |
| f8f126c6ca7cae18c0cb8ac428823c2d  | 0 | 3 | 0 | 0 |
| 5a1e8f7182f8e51a63420648af4766fc  | 0 | 3 | 0 | 0 |
| 2992959628f215049438f355279ad1e0  | 0 | 3 | 0 | 0 |
| 895fec1ed2ae394b3d7a42031ca0591f  | 0 | 3 | 0 | 0 |
| d32db63166bb42c93e84ea62cea91c4d  | 0 | 3 | 0 | 0 |
| ba44550f5e3f42ad375b0b4f912196fa  | 0 | 3 | 0 | 0 |
| c4fe22c255a507e9c6b11648ef6ae9f3  | 0 | 3 | 0 | 0 |
| b16802f383bde0657859fcc6962101dd  | 0 | 3 | 0 | 0 |
| c62b52d1b9eae709f453fb1ef57030db  | 0 | 3 | 0 | 0 |
| 64c9ad2527a1dd2d663cece7852a6903  | 0 | 3 | 0 | 0 |
| ac264fc57980f21bf1bd6f4353f86b12  | 0 | 3 | 0 | 0 |
| 099b790dca444f220becbaed7c40b58b  | 0 | 3 | 0 | 0 |
| fbcb5889516ac9f053c7c9b6a1842f259 | 0 | 3 | 0 | 0 |
| 5156c63ff0b0a7626c35d1fed68281a7  | 0 | 3 | 0 | 0 |
| 5941b8f6d85f841a17b2a159628245ee  | 0 | 3 | 0 | 0 |
| d01b8214a30c5d6c7946beaaf4d1025b  | 0 | 3 | 0 | 0 |
| 20327fa4d4802b05aadfcb3975a2df0d  | 0 | 3 | 0 | 0 |
| e574cb91b4f2da26571eb2cc63385fd2  | 0 | 3 | 0 | 0 |
| 5260a9d58ae587a05c627dd656b3e71a  | 0 | 3 | 0 | 0 |
| 0c471e7ee270dfce031e2d2fc0144763  | 0 | 3 | 0 | 0 |

|                                  |   |   |   |   |
|----------------------------------|---|---|---|---|
| 6c2576603415338658a8db1cd547e271 | 0 | 3 | 0 | 0 |
| 3457b69f8d21ad8f8bc11a4558d28480 | 0 | 3 | 0 | 0 |
| 63283f20c69e015b2101bf4b4e93690d | 0 | 3 | 0 | 0 |
| 80c5382e1189acb2b2ceddcdbf85c4f9 | 0 | 3 | 0 | 0 |
| cd378752161a5f41be2f99df29465699 | 0 | 3 | 0 | 0 |
| ca939de5baa82f5039b807932c39b76f | 0 | 3 | 0 | 0 |
| 4c32fb7363843f8fae8a92462ab4affd | 0 | 3 | 0 | 0 |
| 4337ef5864b06ae5fc19b6186a5def56 | 0 | 3 | 0 | 0 |
| a51ba07158c9d714a335ae3d9d542c9b | 0 | 3 | 0 | 0 |
| 3167a6131451a02669988dd3cdaa6358 | 0 | 3 | 0 | 0 |
| 13cb42960da9c019a702f5ace8138ace | 0 | 3 | 0 | 0 |
| 760df624d332641d215968a9c37e638a | 0 | 3 | 0 | 0 |
| e041a50cbb6cc80c5ffa425009b55287 | 0 | 3 | 0 | 0 |
| 0cc770fdf6a76ed5a00789eaf9185e5e | 0 | 3 | 0 | 0 |
| 67832b31b2d3eb5cfd7037ff84661211 | 0 | 3 | 0 | 0 |
| 64a7c4356e79db36f1d28c2a5d5b4f8b | 0 | 3 | 0 | 0 |
| c0443e029179d38d00e27fc9249b03bf | 0 | 3 | 0 | 0 |
| 7f80dbfba040c5f653ccb9a64c64dfa7 | 0 | 3 | 0 | 0 |
| 01cd37ebf64359b6f934442e7b72c69b | 0 | 3 | 0 | 0 |
| 9a85e02188483e4a11874dcde051f2f6 | 0 | 3 | 0 | 0 |
| 38f41c60592220b182215914cc78d0c0 | 0 | 3 | 0 | 0 |
| c42d13f7e94256cea8df63adfc052924 | 0 | 3 | 0 | 0 |
| 3abe13948eae7f7673a5df622baacaa7 | 0 | 3 | 0 | 0 |
| 315450d80c55c0e850d1105142647d3d | 0 | 3 | 0 | 0 |
| fa6b9b461d1f012234717b5a3e8ed1db | 0 | 3 | 0 | 0 |
| d8d5e4386d27450ff836117aa66a0eab | 0 | 3 | 0 | 0 |
| 01564e1cc06282b305459af52cb0bc63 | 0 | 3 | 0 | 0 |
| 045296e1c7c6c7a4579e2286f2519607 | 0 | 3 | 0 | 0 |
| c4ccf575f24fdbad91d63a1faed7dad0 | 0 | 3 | 0 | 0 |
| 7415c9e4e4fa2269b256cbcbf156f628 | 0 | 3 | 0 | 0 |
| cc9698466f892411de656a1ed2e52639 | 0 | 3 | 0 | 0 |
| 01adb4015d21636b1906411406f416a3 | 0 | 3 | 0 | 0 |
| 7e8cd52f9a83171f898984e941e30c96 | 0 | 3 | 0 | 0 |
| e3028b1987dca54cc4a66290dd09add2 | 0 | 3 | 0 | 0 |
| ff2b8b347ac41e6ec335a2f9d366dbc8 | 0 | 3 | 0 | 0 |
| 0220637ad647aae0a4dab2d799627c4c | 0 | 3 | 0 | 0 |
| 04e8cd0181d0978cd3dc7d61a48c56b9 | 0 | 3 | 0 | 0 |
| 8762b2556dc6270c59b87b835d1e5728 | 0 | 3 | 0 | 0 |
| a95b01b76995dfc1e6e921efd3daf2f9 | 0 | 3 | 0 | 0 |
| de72613fab12f767d48cb225bf195bd9 | 0 | 3 | 0 | 0 |
| 66a02f0b0fb1eeef6e26f9e365c4a191 | 0 | 3 | 0 | 0 |
| 6f538fa62b702f758d330216b4b4a0a5 | 0 | 3 | 0 | 0 |
| f853ed9d2da017b32d1c6e1450c410e5 | 0 | 3 | 0 | 0 |
| 1bed3055742df6f0ee6982f1b8766a31 | 0 | 3 | 0 | 0 |

|                                   |   |   |   |   |
|-----------------------------------|---|---|---|---|
| 57e1a20df26c2df420b3f6ab72f793c4  | 0 | 3 | 0 | 0 |
| 9696da03723374855c09a03044495689  | 0 | 3 | 0 | 0 |
| acd4f3d597caeb80f5ffa3d7791e0fdd  | 0 | 3 | 0 | 0 |
| 249d11ee2e7fe6e09831fce43f1bb7c8  | 0 | 3 | 0 | 0 |
| a8c6a2d157530a6c45dca07f2c984e04  | 0 | 3 | 0 | 0 |
| 54ae60b90cea1405488e4ebd3ed53ca0  | 0 | 3 | 0 | 0 |
| 57fa76f0390a1fbc82324c7ea39f9cd6  | 0 | 3 | 0 | 0 |
| 08d3be8fb9d11c9e20083a3002f1d581  | 0 | 3 | 0 | 0 |
| 54b02394c09836a7ce002bd4f6675793  | 0 | 3 | 0 | 0 |
| 36c8821d4d5ecca09b702813071c1c7b  | 0 | 3 | 0 | 0 |
| 4ea1a773043e6b6f629cdbd414857db3  | 0 | 3 | 0 | 0 |
| e3f6c9f65ba971a54abddf75666ed89b  | 0 | 3 | 0 | 0 |
| 318bcc322174dfc86e5f93c6158602eb  | 0 | 3 | 0 | 0 |
| a57d27cc59f6604c4a2f9941e98bfea8  | 0 | 3 | 0 | 0 |
| 656a2cecaec3f0e34dcfe2f7c41aa86a  | 0 | 3 | 0 | 0 |
| e1d3010d1735c8e388f1b625aac4a186  | 0 | 3 | 0 | 0 |
| 3125c4a47a761c247813c160bc923ce1  | 0 | 3 | 0 | 0 |
| a4c6f9f5f0e67147d043297e3cd6fda8  | 0 | 3 | 0 | 0 |
| 5fefd074fe15f8b1d4796ee49f71d268  | 0 | 3 | 0 | 0 |
| 1004b1c89fb7bbe837ba8dd9940376d   | 0 | 3 | 0 | 0 |
| 3a524af72cb27e085f88320531e6a2c2  | 0 | 3 | 0 | 0 |
| afdfc3fd535e21e20e0857c5999b9e9   | 0 | 3 | 0 | 0 |
| 5a61905a65eeb7d7c3a70277d2e996f5  | 0 | 3 | 0 | 0 |
| 3bbca4c98b3bdcc1e7f3e23b4342c4c1  | 0 | 3 | 0 | 0 |
| 60601724072a0e1bc76875bd8ec4317f  | 0 | 3 | 0 | 0 |
| 485d7fc8bacaf541400eec1149ed5f69  | 0 | 3 | 0 | 0 |
| f35d475f551a1768f276fe2379dd7308  | 0 | 3 | 0 | 0 |
| c8cad70ce3ec3194736d71a82171b150  | 0 | 3 | 0 | 0 |
| d5b9d2d3ded74bc7aa917a2f945e9915  | 0 | 3 | 0 | 0 |
| bed8c0513cb2773bdf5a76b05f3f1308  | 0 | 3 | 0 | 0 |
| 2bfed82ef70e02a3e3c2447bc741950e  | 0 | 3 | 0 | 0 |
| 0f59c69647108fa76bf6526206732f3d  | 0 | 3 | 0 | 0 |
| b1c7ba376aca480229f098dd8f50dd89  | 0 | 3 | 0 | 0 |
| 5c24cb3e922747d4dbf1526e0613e294  | 0 | 3 | 0 | 0 |
| 2912f852fda8fbc66721ac2e6e754048  | 0 | 3 | 0 | 0 |
| 2c4703ed8be23d617396c96799ba6406  | 0 | 3 | 0 | 0 |
| 908ad098f307f6f0ac95aa06094f475b  | 0 | 3 | 0 | 0 |
| 5505ff1c92e7fedf9bcac55ed7090c8c  | 0 | 3 | 0 | 0 |
| 1d7eee1db29febab97298b54b3c587fa  | 0 | 3 | 0 | 0 |
| 56a570b8fc4dbd4321d20cc2e49aefa6  | 0 | 3 | 0 | 0 |
| 32f47b229df2c632f04c7536d4c462b3  | 0 | 3 | 0 | 0 |
| dd86319c1070453420e2f7c8dcd95fa   | 0 | 3 | 0 | 0 |
| cba0cececbbedd10c279666a0d19d0b43 | 0 | 3 | 0 | 0 |
| 658c4e88c7adfba1662d453cee93e8a1  | 0 | 3 | 0 | 0 |

|                                   |   |   |   |   |
|-----------------------------------|---|---|---|---|
| eae6841577808a81ad242f8b93bfc5a7  | 0 | 3 | 0 | 0 |
| 477661e5c65aa827328791dca6cc851b  | 0 | 3 | 0 | 0 |
| c51869d827310dadada972a9dc350de7  | 0 | 3 | 0 | 0 |
| b8f05bac6b6b1f616604c09556e80160  | 0 | 3 | 0 | 0 |
| c35c7d439fb4aae9d6578d07620487f3  | 0 | 3 | 0 | 0 |
| 53b49e7bf0d4f0cf7ed18f617e306633  | 0 | 3 | 0 | 0 |
| 1048c1464231f3b98eb792a67f6d8705  | 0 | 3 | 0 | 0 |
| 3302c84b7688942598b0987a33d8cd44  | 0 | 3 | 0 | 0 |
| 276953e5c1c1be68d337dae81dcd6c11  | 0 | 3 | 0 | 0 |
| 46cb179afd3628252b979c7030a85e72  | 0 | 3 | 0 | 0 |
| fa62ff6ed360ee30253be29df7a1191c  | 0 | 3 | 0 | 0 |
| 1bd5a712342a5b3a3cba5d8ad854fa11  | 0 | 3 | 0 | 0 |
| e1ff236e78ad90492ab7290ba53814df  | 0 | 3 | 0 | 0 |
| 4972e01aceba28f72348333c7f047b49  | 0 | 3 | 0 | 0 |
| e0bd6ce690aaf39ff980382b935493ce  | 0 | 3 | 0 | 0 |
| 9fe40fa006e8faa265aa02204112e96a  | 0 | 3 | 0 | 0 |
| 1f16289372475b66f7e049984ca34e15  | 0 | 3 | 0 | 0 |
| f4aeb7942d07406c401fd0572c286c74  | 0 | 3 | 0 | 0 |
| 46205c82feb69d0782634d7fd266c82e  | 0 | 3 | 0 | 0 |
| 2a968b8749cd61dc6567fe79f3aa4bce  | 0 | 3 | 0 | 0 |
| b46dfd6a283f07bfd1f784c0e11a61e4  | 0 | 3 | 0 | 0 |
| cddf85e840634714d59ea9ab3875883c  | 0 | 3 | 0 | 0 |
| c11a43cde01005e6ea45181b03d2fbf5  | 0 | 3 | 0 | 0 |
| b45ce9d7c3e11d71a76cf2acccc19be6  | 0 | 3 | 0 | 0 |
| 9ccca79e7b5ed958510cae01d12a0ce2  | 0 | 3 | 0 | 0 |
| feaaaf817141e5bce23e8f182dd090e15 | 0 | 3 | 0 | 0 |
| 8aeb908c8f6eddefa655cfc29bd1ca31  | 0 | 3 | 0 | 0 |
| c028b927978a1282a24b5fc4f05159a7  | 0 | 3 | 0 | 0 |
| c3537f5f04a76ba700789a9cb9193579  | 0 | 3 | 0 | 0 |
| 06eaa4041f60f02599e16f16d98926ad  | 0 | 3 | 0 | 0 |
| 925a63acda0f6ec5ccdbea26277dfffb9 | 0 | 3 | 0 | 0 |
| 2809a6ac2f92fd306384116ff43a6a48  | 0 | 3 | 0 | 0 |
| 1d1254e15a7fa1066c95edf71c2502c9  | 0 | 3 | 0 | 0 |
| e0b6728ea1549e96575d755a37f1b623  | 0 | 3 | 0 | 0 |
| 796d1d055a7d3650204c3f3966a947ee  | 0 | 0 | 0 | 3 |
| 70b902bfe6347133805c1ccdd26a46c8  | 0 | 0 | 0 | 3 |
| b75aee729c070cc7692da3d24d8a1d61  | 0 | 0 | 0 | 3 |
| 0d26d5ca5a9b67604035acc0f93bcf98  | 0 | 0 | 0 | 3 |
| 9c4afd78088468e8d16440013d732f2c  | 0 | 0 | 0 | 3 |
| d9cc1b2dfd46537bc3dbfd0e76d50aff  | 0 | 0 | 0 | 3 |
| d0da4d77bdc3b0d5525cf91ea5b37e19  | 0 | 0 | 0 | 3 |
| 167b64c380e84426c2e07f86723f4f21  | 0 | 0 | 0 | 3 |
| ec620f904e50cfa06bece6975998aff2  | 0 | 0 | 0 | 3 |
| 3342f3512d00e4d0d905d9d613618ff9  | 0 | 0 | 0 | 3 |

|                                  |   |   |   |   |
|----------------------------------|---|---|---|---|
| 7c47b1790514fc493670e2c1c3a36520 | 0 | 0 | 0 | 3 |
| 07b28d7a90a4c5345c8db99782ba6ed9 | 0 | 0 | 0 | 3 |
| 882b2fabfd0b1f8c05cb76c7af06aa53 | 0 | 0 | 0 | 3 |
| dc3c3c422a6cfa380986205824fa75ff | 0 | 0 | 0 | 3 |
| c138c403d2a03e1759ab7c803e040922 | 0 | 0 | 0 | 3 |
| 753cf69b014ae95c5394e0c5ceaa2fb  | 0 | 0 | 0 | 3 |
| 6919904f223434235639333bc70e739a | 0 | 0 | 0 | 3 |
| 9f4515d1e7eceed21f5950459e0c9e2  | 0 | 0 | 0 | 3 |
| 46d9ac5d4edcdf9228e235fc45642d05 | 0 | 0 | 0 | 3 |
| 5b1e49ee1426c76d285e765a4b3185ea | 0 | 0 | 0 | 3 |
| d052879bb650eb19630545b73bde04ea | 0 | 0 | 0 | 3 |
| 1f418237806f46598df2bcbe83a426fe | 0 | 0 | 0 | 3 |
| eb7659027bb71aaa0218c686eb21976e | 0 | 0 | 0 | 3 |
| 5b0001616921bcf8a9a38a6343749c2d | 0 | 0 | 0 | 3 |
| 30cc1ef6274d46ce3e8556938b52c2e9 | 0 | 0 | 0 | 3 |
| 8f66a0f18859eb2fc49de64566f6ff8b | 0 | 0 | 0 | 3 |
| 687c118ba51ee99b0227639a4964e6ca | 0 | 0 | 0 | 3 |
| fe6a3fe6d900ea87bf10b1c1aeaf1d89 | 0 | 0 | 0 | 3 |
| c988eb6df57079b1675105dfef70be1d | 0 | 0 | 0 | 3 |
| 84a56c9edb2048e3e26e3f1da41f3ead | 0 | 0 | 0 | 3 |
| 995252341892fac02abf012f9a5efe25 | 0 | 0 | 0 | 3 |
| 71b73c457d9c8d5d62266fcf23efe31e | 0 | 0 | 0 | 3 |
| 3ad5936922581aa15857e113dead45fa | 0 | 0 | 0 | 3 |
| bac8ea2fc98d4b292ee73b3303c2be98 | 0 | 0 | 0 | 3 |
| 691539709d54e61214ee7e9de187a502 | 0 | 0 | 0 | 3 |
| 9ee4dadee7dcd2153210d9b5ee2b3d0d | 0 | 0 | 0 | 3 |
| 74444043461317e42136ef477a730841 | 0 | 0 | 0 | 3 |
| df9c8808b4e82c5ff23307953ab8f012 | 0 | 0 | 0 | 3 |
| f2cbbdaeadc74fef69c0382b47dd849b | 0 | 0 | 0 | 3 |
| 5e0a2c520d18c63e2f5e1b31ffcdf96d | 0 | 0 | 0 | 3 |
| 8b2225dfecc154d2cc4e16476c524750 | 0 | 0 | 0 | 3 |
| 7fc405e31d7bd767c1a10f645822934a | 0 | 0 | 0 | 3 |
| 27c4196aa55be983b754c7bcfe2dfd8c | 0 | 0 | 0 | 3 |
| 10a4115d4409d41ab66836472302d077 | 0 | 0 | 0 | 3 |
| 544a1f75400883eb83bcd19900075a23 | 0 | 0 | 0 | 3 |
| 88f5bf52f2081d11aff295f2b847dd42 | 0 | 0 | 0 | 3 |
| e19458171030ab159f15144aa09c406c | 0 | 0 | 0 | 3 |
| 1b8e4715b69161df8ca86cbcd53be211 | 0 | 0 | 0 | 3 |
| 6fc8e5ab56b90640b9022405fa013b30 | 0 | 0 | 0 | 3 |
| 8378fe84ad26111cab7000da56ab72c3 | 0 | 0 | 0 | 3 |
| 41d51e32cffe02b32d13eb8ce3113e4c | 0 | 0 | 0 | 3 |
| 8424503d175efb3f943b47b8296e7413 | 0 | 0 | 0 | 3 |
| 8b88be4fe50633356439e59f29d13c5e | 0 | 0 | 0 | 3 |
| ab338d4f23165fb7a4d12cfc55641d12 | 0 | 0 | 0 | 3 |

|                                   |   |   |   |   |
|-----------------------------------|---|---|---|---|
| c497ba57b620dc44c8bd5dbb0576be01  | 0 | 0 | 0 | 3 |
| d0fef7ecc6a9e5ad81ef5b89c92a47c7  | 0 | 0 | 0 | 3 |
| aacd54173d7cd0214fe5d7e87df6ad2b  | 0 | 0 | 0 | 3 |
| 14e00e08c0c4737f22ca7d9643d3f0f2  | 0 | 0 | 0 | 3 |
| 00d63535edea528aef9ab25d58116546  | 0 | 0 | 0 | 3 |
| 376bf56f9227ba9d4e64ad9166e73277  | 0 | 0 | 0 | 3 |
| 698b77dcea5df102e56536791e40b154  | 0 | 0 | 0 | 3 |
| 6913c1abca5b57e409d65840d7017a5e  | 0 | 0 | 0 | 3 |
| fddefd8c4655c535f9eea3fc0141540f5 | 0 | 0 | 0 | 3 |
| 779fc9b8e0133966e0ed1f6f089df483  | 0 | 0 | 0 | 3 |
| 93d65d8893f129c516adebcc14b4f284  | 0 | 0 | 0 | 3 |
| b7528cc86590e0731b0cfebd63bd9b06  | 0 | 0 | 0 | 3 |
| 20d5be6060341bff37221b79e4ed913c  | 0 | 0 | 0 | 3 |
| e35fe71778d44c4bb2a28858ffc584b7  | 0 | 0 | 0 | 3 |
| e175bfb62cfa7dada36ca799f9d54257  | 0 | 0 | 0 | 3 |
| 8786a229a22810dabfebe471580310f5  | 0 | 0 | 0 | 3 |
| 2bd232cf5d7a60b282f9a7dc9800425e  | 0 | 0 | 0 | 3 |
| 612b420c1e7044e3a4d2d9c0f8e837bc  | 0 | 0 | 0 | 3 |
| 7d4e89185b9e20caf6c4d0320037e4ed  | 0 | 0 | 0 | 3 |
| ec022a84f3816efb858a5c59e10d63a1  | 0 | 0 | 0 | 3 |
| 5561ba07c78d69a010fffa2f9f4badde  | 0 | 0 | 0 | 3 |
| dc2c5e73ebb32901f049f09d7b1938f5  | 0 | 0 | 0 | 3 |
| 6c2e044aa28699cc8d556dc13aa23101  | 0 | 0 | 0 | 3 |
| 23f2184e150545072f42e460e8d910ef  | 0 | 0 | 0 | 3 |
| bec75233ccefcf52c217915cf2462112  | 0 | 0 | 0 | 3 |
| cc018879f3572e67d0faccf28e2136f1  | 0 | 0 | 0 | 3 |
| dbc3e819154cc434f40bf3d4601ff1ab  | 0 | 0 | 0 | 3 |
| f10eb808274409f3f9f9c835937fe7ed  | 0 | 0 | 0 | 3 |
| 5a5120f57a00064ffa13ff09476bc957  | 0 | 0 | 0 | 3 |
| 7be1b29946542f6b66673230c69e0999  | 0 | 0 | 0 | 3 |
| fd293fbd01119f89be74843fb243e199  | 0 | 0 | 0 | 3 |
| ce22598fc522cf2f985a3421ff9e76bc  | 0 | 0 | 0 | 3 |
| d6f93af2d8e075e3d83ef35cf4487ba7  | 0 | 0 | 0 | 3 |
| 1cfe54e89fd5ecb047f37023eff82475  | 0 | 0 | 0 | 3 |
| dfc92150eac909c4736afbba0526e     | 0 | 0 | 0 | 3 |
| a53be673eeef9e08fd2bab6047bb0aec  | 0 | 0 | 0 | 3 |
| 6d1507028670b1fc6a0a5c933d1b3448  | 0 | 0 | 0 | 3 |
| f00b118dc5325d2a50d48fe610b04715  | 0 | 0 | 0 | 3 |
| 3bced4244ae8e2c6b5b0e29dbd97e907  | 0 | 0 | 0 | 3 |
| ed6834e346bd5a3dc5b2cf4c17f4ebdc  | 0 | 0 | 0 | 3 |
| 91aa16e112e5be2a5587d6e91666681d  | 0 | 0 | 0 | 3 |
| 2e6733d7ab0cd4fd2f02a8e4a1231e37  | 0 | 0 | 0 | 3 |
| 9ae885f692aab471cf5fdc9a22f4c118  | 0 | 0 | 0 | 3 |
| e5c0241ae7af378780da4128a134e577  | 0 | 0 | 0 | 3 |

|                                  |   |   |   |   |
|----------------------------------|---|---|---|---|
| dedbe3aaae67b0535c00881d0db5eb9f | 0 | 0 | 0 | 3 |
| dfbd9cedeb5b66e30d661ac2f03a421d | 0 | 0 | 0 | 3 |
| 269adc5ec3e5aeae870714bc5c550651 | 0 | 0 | 0 | 3 |
| 472ea61d14ba0986c998528e8f3c4cab | 0 | 0 | 0 | 3 |
| f91f7ac4aec35fc6401ef599152cf9c  | 0 | 0 | 0 | 3 |
| 9bb8777e0ca9c457d897279dd42b4152 | 0 | 0 | 0 | 3 |
| c967cee868fda96e863d69fba37d2a0f | 0 | 0 | 0 | 3 |
| 280f3c9b2b46f766e7a194abec772231 | 0 | 0 | 0 | 3 |
| 4db2e1038c526d884a0d61f682183bf4 | 0 | 0 | 0 | 3 |
| ca24e2126f9470e32776140c62c31543 | 0 | 0 | 0 | 3 |
| 4409653e74f40b0afb173dd9b461cd57 | 0 | 0 | 0 | 3 |
| 3255eaaef08418802bd01ca4664eb347 | 0 | 0 | 0 | 3 |
| a529d3a656913a243613d28727909c0e | 0 | 0 | 0 | 3 |
| c5fb5cf4a2b866b2ad67d4b822c845c3 | 0 | 0 | 0 | 3 |
| 9a58368ffa118715c8bd08c2f31d8711 | 0 | 0 | 0 | 3 |
| d9a6b9182f90a41ca24d71f5a43798be | 0 | 0 | 0 | 3 |
| 3f679031af5b5d3ff9b371999abd9088 | 0 | 0 | 0 | 3 |
| e616bc55ea1f5ce00a447c47ab441060 | 0 | 0 | 0 | 3 |
| 0a5fcaeb268af3888d3fa5407c3300d1 | 0 | 0 | 0 | 3 |
| bb486c2fc7a86278aaa34faecd7825ad | 0 | 0 | 0 | 3 |
| 4580eba44c3ee1ad02328ab2853114e9 | 0 | 0 | 0 | 3 |
| f8b29ad9f7244bccbca07d23ec177c99 | 0 | 0 | 0 | 3 |
| 879bbde759fe768fc49563e7f193508f | 0 | 0 | 0 | 3 |
| 408e12ae14b28cde13760102828758fa | 0 | 0 | 0 | 3 |
| 096e60c0a27123e24564b8e851827896 | 0 | 0 | 0 | 3 |
| 99d69f47f9dc19794e407f7f323bea45 | 0 | 0 | 0 | 3 |
| bbb47ad187aa0f34adb5f6da0ba4ba40 | 0 | 0 | 0 | 3 |
| a410cf714880be99f2517d1eca0f5f52 | 0 | 0 | 0 | 3 |
| 5c4135fc46c75b75624404139a102eca | 0 | 0 | 0 | 3 |
| 561358c8584574329c60c679c5c57131 | 0 | 0 | 0 | 3 |
| a79148c7df32c15425eef5006a8dc488 | 0 | 0 | 0 | 3 |
| e4aadb560757012a0405f26e3b4f774b | 0 | 0 | 0 | 3 |
| b9ce02fb96080176dc9b4ccb5900c90a | 0 | 0 | 0 | 3 |
| 34971b148a3d2eb9910880bebe45b7e0 | 0 | 0 | 0 | 3 |
| 574f2b79474896844c33dfca46e223b5 | 0 | 0 | 0 | 3 |
| 44081c777014c26be1139afd8e352ecb | 0 | 0 | 0 | 3 |
| 9ee214ae23c65a700aef4f798e90593c | 0 | 0 | 0 | 3 |
| 2b12bf6cb1b100c2c831dc1ef1618ed3 | 0 | 0 | 0 | 3 |
| c05f3ee994cfba41c960149e6ed337ff | 0 | 0 | 0 | 3 |
| c9e6d0c114896bf3dbd7f373c29ef7b7 | 0 | 0 | 0 | 3 |
| b130cd71aec0a7d24509a628951d6ac3 | 0 | 0 | 0 | 3 |
| 7130afad3b2df691acfd9255b37afa7a | 0 | 0 | 0 | 3 |
| ffabac0abe6c4f5c59e683748478f109 | 0 | 0 | 0 | 3 |
| 9349e08f7a47798a198739d4aaaffbcd | 0 | 0 | 0 | 3 |



|                                  |   |   |   |   |
|----------------------------------|---|---|---|---|
| 6cc4e35e69dd3351f792b7ebbd5c663b | 0 | 0 | 0 | 3 |
| 36e7618be09d0c20d54bd0dc4da25f32 | 0 | 0 | 0 | 3 |
| c76650baf8826a21c0baaa30f157909f | 0 | 0 | 0 | 3 |
| 30e3a5db78678fa052a4b296e8ddd4e7 | 0 | 0 | 0 | 3 |
| c184eb609ee7d9adef4524ad0d9e1d06 | 0 | 0 | 0 | 3 |
| a7dffec2645736fb2647024fcadc9a10 | 0 | 0 | 0 | 3 |
| 76aa1cfc195cbba865d78be42dcbf9c  | 0 | 0 | 0 | 3 |
| ca644026ebcac988f6f01c86328e0a0c | 0 | 0 | 0 | 3 |
| e8c9f04da9bfd5e05881c060f5fdf3ce | 0 | 0 | 0 | 3 |
| 043c037d140f026193b634bc88027c81 | 0 | 0 | 0 | 3 |
| 8695c9444a65f64c76b874c15b68231e | 0 | 0 | 0 | 3 |
| bc25a99dab1c110b1b37c308c5edffae | 0 | 0 | 0 | 3 |
| 8b65831c7cdbe8e649913c53623f53df | 0 | 0 | 0 | 3 |
| 83f4d3b6710963302b89b55391048e34 | 0 | 0 | 0 | 3 |
| cdcb4f9fd6d87d23aa7deaa74e46a273 | 0 | 0 | 0 | 3 |
| e5662c620d7ba300e634d981548e122b | 0 | 0 | 0 | 3 |
| 8eda9fa5e6683bda5dcbf480097ebc93 | 0 | 0 | 0 | 3 |
| a89f096b506d2166cfebe1c60c495862 | 0 | 0 | 0 | 3 |
| e8e6412a3dfb5534e3c40b9d0efb8b12 | 0 | 0 | 0 | 3 |
| 85df80325d6c007ab2783dbcca517454 | 0 | 0 | 0 | 3 |
| e47ae64687a60489e1f935dec1a9ce98 | 0 | 0 | 0 | 3 |
| ba872bc716869b7933fb82fd67e51bc6 | 0 | 0 | 0 | 3 |
| ac35804583721411ebd3456682675743 | 0 | 0 | 0 | 3 |
| 13716206ab84268e9ca7432bdf2ed530 | 0 | 0 | 0 | 3 |
| d7e6b4b3fe14d829a8b387b4e75262ef | 0 | 0 | 0 | 3 |
| a4513da7a2aa89723ebb845674f2695d | 0 | 0 | 0 | 3 |
| 5f63da30808bd9f6886332ca6edb7d6e | 0 | 0 | 0 | 3 |
| 9333f8b4f0e35dc18f030221ed5bd73a | 0 | 0 | 0 | 3 |
| fbf33f70dc0ced632862563863dab653 | 0 | 0 | 0 | 3 |
| 43dd1588b1cb1e309afafc78c19d5718 | 0 | 0 | 0 | 3 |
| 4c34e58cb08fc72a4e3fce197f3fd830 | 0 | 0 | 0 | 3 |
| a2ae63627bbd163c712b1083c3973a89 | 0 | 0 | 0 | 3 |
| 6d44cda202d14933d29453c3047d7cda | 0 | 0 | 0 | 3 |
| f51b11e4d6092b21153117b5c64297de | 0 | 0 | 0 | 3 |
| c82ebac4f15eaabe9ab4c95b6de5d15b | 0 | 0 | 0 | 3 |
| dc3dae515a46b9ffb357216d9b96410d | 0 | 0 | 0 | 3 |
| 554f93637c69b792db0301ca79357260 | 0 | 0 | 0 | 3 |
| d00b519424684a7629210d09c6f84487 | 0 | 0 | 0 | 3 |
| ec7470053a0adc25a93e4efcbe969bdc | 0 | 0 | 0 | 3 |
| 0817f85b578c951fb44018147de00bbc | 0 | 0 | 0 | 3 |
| 7755db3dee7089273066aedb03bbf8df | 0 | 0 | 0 | 3 |
| 1c1572d6e10c7243a933583778dc4bea | 0 | 0 | 0 | 3 |
| ef962e295f2b51d7b99455396a8da633 | 0 | 0 | 0 | 3 |
| 5db9a158e13982e1ab5430523ec0465a | 0 | 0 | 0 | 3 |

|                                  |   |   |   |   |
|----------------------------------|---|---|---|---|
| 3ee43a4b2cf2ba984aec8615917217d7 | 0 | 0 | 0 | 3 |
| 614d56def8fefe2c3e85b767cdaeb365 | 0 | 0 | 0 | 3 |
| 01ffc8e305188d35aac5796bad465e08 | 0 | 0 | 0 | 3 |
| f7f2f527484cf4dc310a60d6b0a4bec7 | 0 | 0 | 0 | 3 |
| 30b3ac9e3f4f8f3275b07f0fa4f11646 | 0 | 0 | 0 | 3 |
| 2c85c4a31b6f38c0032b3c741c09dbfc | 0 | 0 | 0 | 3 |
| 347e61c3b97287c800bcfd66186b01d8 | 0 | 0 | 0 | 3 |
| 476e48ac0888035a188ffff3c1ac45b1 | 0 | 0 | 0 | 3 |
| 9f04c740fdb73a393d34db72195f90db | 0 | 0 | 0 | 3 |
| c74a6896a3b712b33fc69e411636a37e | 0 | 0 | 0 | 3 |
| 70f2dc69655e3c785553fdd8e26ed5f6 | 0 | 0 | 0 | 3 |
| 14fb2c2259ecb21ae76162c787d38739 | 0 | 0 | 0 | 3 |
| 833ee27ddee8a79fc889ddcf3b77644b | 0 | 0 | 0 | 3 |
| c7fa51f897a62614233e5e73f7d4cb25 | 0 | 0 | 0 | 3 |
| fe8549b98184bc86ebb653aa1dd23d56 | 0 | 0 | 0 | 3 |
| dd4889779d524434c839cceb8a7753f6 | 0 | 0 | 0 | 3 |
| d1a08899300d07b9722a88f63b60b850 | 0 | 0 | 0 | 3 |
| 77adfc8e87a4e7eee347ac6a6f0ce09d | 0 | 0 | 0 | 3 |
| b7b7145fff4dca72d7a300cea7a0767e | 0 | 0 | 0 | 3 |
| 8c26503c6045f05a5fc1ff62f77b0085 | 0 | 0 | 0 | 3 |
| 0592f028058fdc2b6208e7e6e5eef4f8 | 0 | 0 | 0 | 3 |
| b0d711a46b8544437c1e9f85b184336b | 0 | 0 | 0 | 3 |
| f6443362f410ad6880b191c826fc74e9 | 0 | 0 | 0 | 3 |
| fba5da10c549c22151601d7f29c093a9 | 0 | 0 | 0 | 3 |
| 6e37def8bf61fe0a19df2459d3dfb67b | 0 | 0 | 0 | 3 |
| 551e7ebef5409e4ea4d20fe5a0acc55c | 0 | 0 | 0 | 3 |
| 1f0e778cb5ed30f72411f9ec42fd69cb | 0 | 0 | 0 | 3 |
| 64e46841d7eef340e364aaecc86d03a0 | 0 | 0 | 0 | 3 |
| c92ad3955e9c1365568d4f7a26608cf5 | 0 | 0 | 0 | 3 |
| e4eab4b8fb82e72583fd59468dbc1256 | 0 | 0 | 0 | 3 |
| a39741646b03396efc64b80ad803d3d0 | 0 | 0 | 0 | 3 |
| 44dbd46aaca7a3cb41119bc608d0a5ea | 0 | 0 | 0 | 3 |
| bcd454194a0be3a94d27286139362831 | 0 | 0 | 0 | 3 |
| 5c2fed6d25968645353a62b263c62971 | 0 | 0 | 0 | 3 |
| 966fb43c60c2b1ea0cde7dec1c3ec6a2 | 0 | 0 | 0 | 3 |
| 6c328d210ab1994fe4323111f2f3abf2 | 0 | 0 | 0 | 3 |
| 322e73954e001a6296cfa7d2ecc6c7e0 | 0 | 0 | 0 | 3 |
| 9c9c0be2ea2970e86040ddaccbb70440 | 0 | 0 | 0 | 3 |
| 43bceaa4d4f10410a95990a22fc85314 | 0 | 0 | 0 | 3 |
| 91ac49856f2c3c2f3a05211fa36d77e0 | 0 | 0 | 0 | 3 |
| 6ec0c4fed7a12f6d21aa5accdc02a5d2 | 0 | 0 | 0 | 3 |
| dab9af7881875258abbba6d3e0f4b65d | 0 | 0 | 0 | 3 |
| 21131dc57ea0b0b515248c778daeac77 | 0 | 0 | 0 | 3 |
| d0edff272a987c1bc1a864f10cdd2079 | 0 | 0 | 0 | 3 |

|                                  |   |   |   |   |
|----------------------------------|---|---|---|---|
| 03c6d644460765446854efbb8b503ad8 | 0 | 0 | 0 | 3 |
| 9f1fdfd74e2826fc2e0592a2f588ac54 | 0 | 0 | 0 | 3 |
| 758851e4149102b3dccb318d5ce7336e | 0 | 0 | 0 | 3 |
| 06e596f303a81cc1836e6fdbab3e0ef8 | 0 | 0 | 0 | 3 |
| d1bf4fe384a4a3b15ef98a6ca3644e61 | 0 | 0 | 0 | 3 |
| 689bac8bb12c40c73426daa406100710 | 0 | 0 | 0 | 3 |
| 6d7faca7c97b77ffa2b14898f54ca739 | 0 | 0 | 0 | 3 |
| cd91ad3981e29a165df3f458da6ded58 | 0 | 0 | 0 | 3 |
| e724fb993e633e6127d5f450bb081dc8 | 0 | 0 | 0 | 3 |
| 6b294717a8445e4e36392c0838acf1be | 0 | 0 | 0 | 3 |
| 7ffe4e2973d6121a82ef2444841d3c72 | 0 | 0 | 0 | 3 |
| c3e49a9abcdca1381aeac7ab301c4204 | 0 | 0 | 0 | 3 |
| 5d84ea69127477b884196ca10339184a | 0 | 0 | 0 | 3 |
| cec7d6d94c8dd2424e567676058c8c98 | 0 | 0 | 0 | 3 |
| 7e23a045b2c318e2e7a13651fd45ffbd | 0 | 0 | 0 | 3 |
| 12c613c37ebb04019a7ba07a9611cec9 | 0 | 0 | 0 | 3 |
| 32dd73ea0c7d81882e5b5a0797130c3a | 0 | 0 | 0 | 3 |
| 79e3578f9232687478690c5ba893bd9c | 0 | 0 | 0 | 3 |
| 486b5d5db9973b0547e270f998ac8199 | 0 | 0 | 0 | 3 |
| e86e2affe8ed092eb4a2f53e9ae59d69 | 0 | 0 | 0 | 3 |
| 28c4da738e6e360214de07a2e5d14168 | 0 | 0 | 0 | 3 |
| 2a36c21fc7b51d9c25a29d2aab31c34f | 0 | 0 | 0 | 3 |
| 465ee5edf2ca3e4b53f7406273bc8aab | 0 | 0 | 0 | 3 |
| 89fc9c4576a62e05af58c66323dc6956 | 0 | 0 | 0 | 3 |
| 966cf98266df2a85e9186b4100866102 | 0 | 0 | 0 | 3 |
| d6b661f10e326efb207536dc2f380ab7 | 0 | 0 | 0 | 3 |
| 6efe5e15ca1dfa071dd7379ebe42de10 | 0 | 0 | 0 | 3 |
| 60ad5d21648548a738759ea5c4e79d35 | 0 | 0 | 0 | 3 |
| 2f3f5d26c550a17a87b383b2d2b37948 | 0 | 0 | 0 | 3 |
| 864c1ed650ecba5a2452f1bdef7f46a9 | 0 | 0 | 0 | 3 |
| 96e88f51a0b745ad5d4fc66de63b16ef | 0 | 0 | 0 | 3 |
| 36080c351d18d89d56a0c26be2dc52f9 | 0 | 0 | 0 | 3 |
| 29275fd223c93f5b1330b7f461f4a052 | 0 | 0 | 0 | 3 |
| c49f808afd642dbda749677836ec0b63 | 0 | 0 | 0 | 3 |
| 647a1e4a87ee1c3ee269af53402f030d | 0 | 0 | 0 | 3 |
| 4b9acc0987f8a772d0baa0595b2d1071 | 0 | 0 | 0 | 3 |
| fd468baf43c1e0d36b596698d078578c | 0 | 0 | 0 | 3 |
| 15d8be7e9d801bb61694c370c5bc2def | 0 | 0 | 0 | 3 |
| 0a393cb19d1a28b6e2d21f216ea91ccc | 0 | 0 | 0 | 3 |
| f7c8c96765977e9c2b33c0f4e255dcc5 | 0 | 0 | 0 | 3 |
| 239dbe4fd6e04475f113097241eac85a | 0 | 0 | 0 | 3 |
| 380afea1007ab3a54d34d137d2fd5583 | 0 | 0 | 0 | 3 |
| 8fdf280fe1c1ccc112a177f830c0b6e3 | 0 | 0 | 0 | 3 |
| 8f0de293776a95c867a1e6adca237267 | 0 | 0 | 0 | 3 |

|                                  |   |   |   |   |
|----------------------------------|---|---|---|---|
| c7276794965c8deb4acb5617f3f8e188 | 0 | 0 | 0 | 3 |
| ac9d9296ee86ed065fa035beaae64bea | 0 | 0 | 0 | 3 |
| 15061ee1d9ff3adaa883ed492c62bc6c | 0 | 0 | 0 | 3 |
| 7024d8f881f80d62af5522653271a8f8 | 0 | 0 | 0 | 3 |
| 1f5096870baf21405968e1ab4061c410 | 0 | 0 | 0 | 3 |
| 92548bb77b6be6bcbc09403cfaa9a8f2 | 0 | 0 | 0 | 3 |
| 534508c231f49f5bc7a80734750c541c | 0 | 0 | 0 | 3 |
| ff06ba729b320d621a780c332f34d50e | 0 | 0 | 0 | 3 |
| 2c97399145c3ea2ee48f27673d940df8 | 0 | 0 | 0 | 3 |
| 7bf9d7ecd470a2b365c9dea2e4d75c9c | 0 | 0 | 0 | 3 |
| 581516f3828e6ffa781e30f63b9151ad | 0 | 0 | 0 | 3 |
| 81aae1a397760d63c03ccc3b95c20c6a | 0 | 0 | 0 | 3 |
| 45e716f5c4d1d50f323c5f2354f11691 | 0 | 0 | 0 | 3 |
| 4299a2d7ea1bf6eb3d28048b13199145 | 0 | 0 | 0 | 3 |
| c2150b1ae4e62d4451d0750e010951be | 0 | 0 | 0 | 3 |
| 398a957dc34857e93036befa3e9873ca | 0 | 0 | 0 | 3 |
| 12963a1a334ec004cf0216f0b21df377 | 0 | 0 | 0 | 3 |
| 3b5964982273ddcc8343f38ba831588d | 0 | 0 | 0 | 3 |
| 6e832e513e87c247c8f800266b4b0804 | 0 | 0 | 0 | 3 |
| fd2607f6ec34da43c8d4911d3a64a769 | 0 | 0 | 0 | 3 |
| e187d442340945753ffa05b4f897cd67 | 0 | 0 | 0 | 3 |
| 40a265e5becda5f2bb3e54f7772db5af | 0 | 0 | 0 | 3 |
| b43143df82974826bf1aeda836ed1515 | 0 | 0 | 0 | 3 |
| 78d27f19161c4c24bd461ff7add696e5 | 0 | 0 | 0 | 3 |
| 136c633d75c58df24de9c407d60c65ab | 0 | 0 | 0 | 3 |
| d98f1b7670450701a0cdf2948f4f6527 | 0 | 0 | 0 | 3 |
| 9d4597617ac2c5ec012b23d2e4ad6734 | 0 | 0 | 0 | 3 |
| cdafccc42b397481e5c630900837f53b | 0 | 0 | 0 | 3 |
| b14f49ca0d114aff3558a331fd4eb18b | 0 | 0 | 0 | 3 |
| 7439e4571860278a40edb5b4ff8e4c6a | 0 | 0 | 0 | 3 |
| 02eb337cfe10207fd1ac0ef14ba63026 | 0 | 0 | 0 | 3 |
| 7f1724b11aab5226e6d749084e9b0fc4 | 0 | 0 | 0 | 3 |
| 15ac1db0e7f4222ec32917211994d5a5 | 0 | 0 | 0 | 3 |
| dd00689a1237123b1a3065955f475bbe | 0 | 0 | 0 | 3 |
| fa0720eaae406573d7427c8cf4299f6c | 0 | 0 | 0 | 3 |
| 03f007d763644f410797055644bb889c | 0 | 0 | 0 | 3 |
| a38e509fa8bc75a3b3066285f41ec7ac | 0 | 0 | 0 | 3 |
| 1a98830bf9464316bcfdc2ad74b89d53 | 0 | 0 | 0 | 3 |
| 0d191ee3ae2677ef7508785ad246a0e1 | 0 | 0 | 3 | 0 |
| c744c6cffc3b2fb2fb55364a6aaae6   | 0 | 0 | 3 | 0 |
| a55a8e8c342f718f4405b185c3e90f34 | 0 | 0 | 3 | 0 |
| 32f94fbb1500a344d6fc4b9b3cafd66b | 0 | 0 | 3 | 0 |
| 7bdbf24ce2b5b4c92bebaea4cd727e82 | 0 | 0 | 3 | 0 |
| 01453c9948f0cf78afd2be551c9faf62 | 0 | 0 | 3 | 0 |

|                                  |   |   |   |   |
|----------------------------------|---|---|---|---|
| 6be86401e46a5e9d26216ea49bef7b0f | 0 | 0 | 3 | 0 |
| 6708f3220ac64fcd95459f340821a1ff | 0 | 0 | 3 | 0 |
| db5c5eb8cfad240ac9da262ca930b4a5 | 0 | 0 | 3 | 0 |
| aec008c8d6b081b7debb8e14c7ac402f | 0 | 0 | 3 | 0 |
| 5ae65d308f9b39e9b412c04134c51c20 | 0 | 0 | 3 | 0 |
| 2f9dfe698c1c1902b8215cd3e4c2b21c | 0 | 0 | 3 | 0 |
| 0bfd4beb8cb05c89ab9d87b9edaaafb3 | 0 | 0 | 3 | 0 |
| 3fc8b184736df5897d1b7b9fc2c3ad56 | 0 | 0 | 3 | 0 |
| 2a03689c22abdfae5032ad0447a6eb17 | 0 | 0 | 3 | 0 |
| d3b4f4a32b0c0bda98cb08214ade643d | 0 | 0 | 3 | 0 |
| 97b4059ea87d13efd2045d5098066e23 | 0 | 0 | 3 | 0 |
| 2c2de32bcfa3bab7ae26b71536813553 | 0 | 0 | 3 | 0 |
| 3d84637d49f7a585e8acd4490d07ae46 | 0 | 0 | 3 | 0 |
| ad21d978125dd26158a395a12d99ec3f | 0 | 0 | 3 | 0 |
| fe60583374e4a1c107faa2d839657fd5 | 0 | 0 | 3 | 0 |
| f4f926185795d20ed438ebdaf83edf9b | 0 | 0 | 3 | 0 |
| f91c39ff623905a07b468343960e234b | 0 | 0 | 3 | 0 |
| a2054e81fe7cfe81c2ae2b9d8e040d50 | 0 | 0 | 3 | 0 |
| bd65e1653df5baf0bcb58124d644b04d | 0 | 0 | 3 | 0 |
| df5f756484a2eaa999bcf68f003deb06 | 0 | 0 | 3 | 0 |
| 8535d87f555ec1fdacb15905bb1833c6 | 0 | 0 | 3 | 0 |
| 77d8b62da540d2ceeb51aed394b9fcd6 | 0 | 0 | 3 | 0 |
| f11b90ace12606e3500ad2122942c61e | 0 | 0 | 3 | 0 |
| a8c73ca7986c25e010deab5f875e43e6 | 0 | 0 | 3 | 0 |
| 6d18a5788b0db483062a170580f35c3b | 0 | 0 | 3 | 0 |
| 7c842014a27c489fd8359786e7f74e34 | 0 | 0 | 3 | 0 |
| 8ae39e45369be7be87b8dc8214f2e8af | 0 | 0 | 3 | 0 |
| 4a82af2f95bc0cd70e0d2ca929a12390 | 0 | 0 | 3 | 0 |
| e00cf5a241b37a9844af561a848037b8 | 0 | 0 | 3 | 0 |
| 320c17cc3a2e441d5da3a79864ef09df | 0 | 0 | 3 | 0 |
| fe80a55c794708936d664e24403233a7 | 0 | 0 | 3 | 0 |
| c37378e5f24d422ae0c3c8d66482f2fa | 0 | 0 | 3 | 0 |
| 4519391ec27f8d223de5951e4920536e | 0 | 0 | 3 | 0 |
| 08883ccc95dbf16131cb81d03f43ec24 | 0 | 0 | 3 | 0 |
| bdaeb1c09138ce7ddcf2875690e6e8ef | 0 | 0 | 3 | 0 |
| 68c424f35f240a4e3b2c5a2d2c5026a9 | 0 | 0 | 3 | 0 |
| 5b4a37cc26f8b34a2b4a029e53419161 | 0 | 0 | 3 | 0 |
| 663109771000cd7ffefad290bc399215 | 0 | 0 | 3 | 0 |
| c5da9a18959e001557fb97889269fd7b | 0 | 0 | 3 | 0 |
| 943ed7d3c31c2cc5388ec85202cd9ec0 | 0 | 0 | 3 | 0 |
| 9f04f8a2dc9027befce5e07119437a52 | 0 | 0 | 3 | 0 |
| dc984c962b842f7e537bd474c034eca9 | 0 | 0 | 3 | 0 |
| 81bedb1ce2814c3eebf36f4cbb63ec52 | 0 | 0 | 3 | 0 |
| 95980c56b33504ee41ab0a67a3a0222f | 0 | 0 | 3 | 0 |

|                                  |   |   |   |   |
|----------------------------------|---|---|---|---|
| 5244bf062ded1a51c2c21dd9210150ce | 0 | 0 | 3 | 0 |
| c35ed2f7ac4fd424e17d64cef8108ef2 | 0 | 0 | 3 | 0 |
| f925d8bcbfaf6e70fb0ab46be5feb8e8 | 0 | 0 | 3 | 0 |
| 3745677ce6068a3cbc3f2d0c5e02a4f0 | 0 | 0 | 3 | 0 |
| cf174a9cd5a314277cce1fd6f783e21d | 0 | 0 | 3 | 0 |
| 6f83d9fe5b09823c3f8d7de411857628 | 0 | 0 | 3 | 0 |
| a0d8ecad5b1dce00f108de947715599c | 0 | 0 | 3 | 0 |
| 96b88aa2cc52dc4a17209074994e69ea | 0 | 0 | 3 | 0 |
| 5a348e851a7060d78218466b181a1969 | 0 | 0 | 3 | 0 |
| 8a1aa678e1aee0ec8efde4d4c8c95c7a | 0 | 0 | 3 | 0 |
| c473af08e4fb4d8f25040256aaa7fd30 | 0 | 0 | 3 | 0 |
| 3a8d0f9323cbac9aa4385acf1276915c | 0 | 0 | 3 | 0 |
| bfa65f47f2dd495000ee039f2536e816 | 0 | 0 | 3 | 0 |
| 3f7de41c2c2ff7afc872e9f32236c534 | 0 | 0 | 3 | 0 |
| 6845e209fb11262deb576d3aac98a961 | 0 | 0 | 3 | 0 |
| b9c7a9436d233bd79176d5066ce0e8e8 | 0 | 0 | 3 | 0 |
| 8068078cf49dcc7e1bc3801e008dc469 | 0 | 0 | 3 | 0 |
| e167652494ebc2aece95cbf37d5efc71 | 0 | 0 | 3 | 0 |
| 3cda8cbbfa7ecb51b31bb288ff3bf21d | 0 | 0 | 3 | 0 |
| d327f81013bdf8e1901bae3a25892f9e | 0 | 0 | 3 | 0 |
| 6da621db65cb4620e27115e363e066b8 | 0 | 0 | 3 | 0 |
| 44dad27770c88d6d8ff5c1672900e8ad | 0 | 0 | 3 | 0 |
| 71cc7fd06731704f870d088b25096224 | 0 | 0 | 3 | 0 |
| f41e601cd8af5b08d1184f2f0f2e40ec | 0 | 0 | 3 | 0 |
| 8eafc74b7df7701f6017770340077e45 | 0 | 0 | 3 | 0 |
| c6fb1b0f8376ac000c4831d3cfbdfa28 | 0 | 0 | 3 | 0 |
| 8d0466fb7fb56ccaaeca2ece189fd31f | 0 | 0 | 3 | 0 |
| 7815db30b77b7a2d61bf282eac889926 | 0 | 0 | 3 | 0 |
| c302e259973ddd22994105c641938115 | 0 | 0 | 3 | 0 |
| f4ea488626b3f555f62144ed6f153ac0 | 0 | 0 | 3 | 0 |
| cc37fdea4fe7b8c54e1007df7de0abf7 | 0 | 0 | 3 | 0 |
| 8e5cc09523a316a38d6f1b85956ac754 | 0 | 0 | 3 | 0 |
| 657d945f60871d3ff53d4b3840523d8e | 0 | 0 | 3 | 0 |
| 1b335eadc33bd78d8491cbd5da7f3e3d | 0 | 0 | 3 | 0 |
| 1b5604adcd5ccd8d79181dad92e46d1b | 0 | 0 | 3 | 0 |
| ea25b16c9c9baa9b76d25906aaf8eb5f | 0 | 0 | 3 | 0 |
| 3bd215e4508405299c3762f55ff82ea1 | 0 | 0 | 3 | 0 |
| 752ea2c65041c594cad22fbebeld1359 | 0 | 0 | 3 | 0 |
| 8ed285afd9dada1576fcaa722ac07e1f | 0 | 0 | 3 | 0 |
| de16032ee0f96df16d99893e359f4090 | 0 | 0 | 3 | 0 |
| 663b0f54d1dee979eacb174285efc719 | 0 | 0 | 3 | 0 |
| 0266fe62b9d7d3a6da4c58335f268bb0 | 0 | 0 | 3 | 0 |
| d565847dd4901be9879c009cb1f36c6c | 0 | 0 | 3 | 0 |
| 5a3f04fdc6e56e48a9d93ffd7499710b | 0 | 0 | 3 | 0 |

|                                  |   |   |   |   |
|----------------------------------|---|---|---|---|
| a801b620f15d7d47a6dbd30088761da8 | 0 | 0 | 3 | 0 |
| 614cbc233fdb626d5fbe332a76b48416 | 0 | 0 | 3 | 0 |
| 4aad7b455a0c46125ff4006508ad834  | 0 | 0 | 3 | 0 |
| 82785a2f43ebbf575056ca5aa8a51698 | 0 | 0 | 3 | 0 |
| 89b6c29e68ce9885e82e3db9d6d12e7a | 0 | 0 | 3 | 0 |
| c982d0a937eb00bb3af7073b9bdb32c9 | 0 | 0 | 3 | 0 |
| c70d18d477af8caab9c441d3d3f39c03 | 0 | 0 | 3 | 0 |
| 5b2b9c1cf5ce333402257b67b52b8279 | 0 | 0 | 3 | 0 |
| 61ebdfa5622e1fe62cc43b39c0ba8001 | 0 | 0 | 3 | 0 |
| 562e790704f80c978b501e3400e0bfa0 | 0 | 0 | 3 | 0 |
| bbb8c66121584206bc5a16afa90ae705 | 0 | 0 | 3 | 0 |
| 9b2a55a88068d02d757dcd53498d1c14 | 0 | 0 | 3 | 0 |
| eee923b2a77f2407c1b2f53c44708327 | 0 | 0 | 3 | 0 |
| 6247a3184892067f4869fdd60769f64e | 0 | 0 | 3 | 0 |
| 5594e04557001adc3c5c81e3483691e3 | 0 | 0 | 3 | 0 |
| 8611006d305325b987365dab645daf81 | 0 | 0 | 3 | 0 |
| 98aab316755a3822bc55cc83935242b7 | 0 | 0 | 3 | 0 |
| f2fde3a21341ac113105bcc8d856b9f  | 0 | 0 | 3 | 0 |
| fb6a039a1746fa356f40154e01181b8a | 0 | 0 | 3 | 0 |
| 3c4a1cdd711e33eb68b24d49354fe1c4 | 0 | 0 | 3 | 0 |
| afb621159d0a7188f46bf3e26bbdec55 | 0 | 0 | 3 | 0 |
| c475cb73682764decbaa958fa21729c4 | 0 | 0 | 3 | 0 |
| df66e1ec164ee69f83d6a6f07ec17232 | 0 | 0 | 3 | 0 |
| e3742287761986bb7fced95d92d6a03  | 0 | 0 | 3 | 0 |
| 00b4778a69c27b565e4d59c06003452f | 0 | 0 | 3 | 0 |
| abb5b5d8eff74a9f87da5c3900dc5c3c | 0 | 0 | 3 | 0 |
| 4149c1cf4bf3adab1b0cde1417948e65 | 0 | 0 | 3 | 0 |
| 74a7464035568d5745ac0a20da3f586d | 0 | 0 | 3 | 0 |
| c970149eb33837d85d836ca73ce7dd56 | 0 | 0 | 3 | 0 |
| 42b65e81371a2bad4f74e417ab49511b | 0 | 0 | 3 | 0 |
| 77918e8e15b45a83ecfd164a3c13e7c5 | 0 | 0 | 3 | 0 |
| 720e5504f63348d9c662c31bedc7ed09 | 0 | 0 | 3 | 0 |
| e24bd3154c4fcd5f4bfb75f5f259bd5  | 0 | 0 | 3 | 0 |
| 12ac212f867508fe1b1f45253a69f1f5 | 0 | 0 | 3 | 0 |
| 64a4cf9b074fbc69d2f3a811b048709a | 0 | 0 | 3 | 0 |
| 3b24d780c1d7f31005db13260de9f0db | 0 | 0 | 3 | 0 |
| 1f2ebbea80be24c334e1e8fb629d33b5 | 0 | 0 | 3 | 0 |
| d0768b8d8bebb89e145bab1ac791630e | 0 | 0 | 3 | 0 |
| 5420f9efa7174e76af6adfa1586c3f9e | 0 | 0 | 3 | 0 |
| e19f7261b53084e46f2528d60a0de3a4 | 0 | 0 | 3 | 0 |
| ae5964463eec442747f941bd7430ea9b | 0 | 0 | 3 | 0 |
| db03bc4595542bf9aab469f49b5fbaf0 | 0 | 0 | 3 | 0 |
| 7e12eaad43dc31184717fca54140ed3f | 0 | 0 | 3 | 0 |
| d1cdf010558a39d465d56df94ddfe4d0 | 0 | 0 | 3 | 0 |

|                                   |   |   |   |   |
|-----------------------------------|---|---|---|---|
| 70d1622fbb37b1a7de863284fb83e241  | 0 | 0 | 3 | 0 |
| c8217f55fc0d278df43009b11d90917d  | 0 | 0 | 3 | 0 |
| 2dbe7d875bd3ba631a488f9975266d71  | 0 | 0 | 3 | 0 |
| 4b98493b0595bbce334646c159c19ef4  | 0 | 0 | 3 | 0 |
| 76cdbad278a23bf254cf35c40ab92cda  | 0 | 0 | 3 | 0 |
| f271e2210597fdd9956ea0736c8926a6  | 0 | 0 | 3 | 0 |
| 4431d7150da51a7b82452b2149c068dc  | 0 | 0 | 3 | 0 |
| b60c6a176eeded624df8bb34a8400a72  | 0 | 0 | 3 | 0 |
| 952c5c01ce3eb65c410a11e083ce2b69  | 0 | 0 | 3 | 0 |
| bce76eff28720f4eac5d2571e7df2f64  | 0 | 0 | 3 | 0 |
| 97778c2abdc0bd367ff936eb6740c970  | 0 | 0 | 3 | 0 |
| 7f796397ad30ac056ebf99c993bd89a7  | 0 | 0 | 3 | 0 |
| 1fd40c908de73fcecca6d3549a202377  | 0 | 0 | 3 | 0 |
| 06827c24c0d341c254cbc7bb0d2ca77a  | 0 | 0 | 3 | 0 |
| ed6e980ce6db2429b692fd2d69fd7f50  | 0 | 0 | 3 | 0 |
| 2781de0dec5ca1191ae8d0e8e5d28e31  | 0 | 0 | 3 | 0 |
| 9916d41a61e03482e2736cc05333f9f2  | 0 | 0 | 3 | 0 |
| 3aec543a696b0d1b2da0ac7a518cc14c  | 0 | 0 | 3 | 0 |
| f9c2d44299d7f2517d709af9961e5e36  | 0 | 0 | 3 | 0 |
| 97a215e66dc05a029af6e0614b7cf48c  | 0 | 0 | 3 | 0 |
| 24fa853bc0ffe942573fc075cdb3e5e3  | 0 | 0 | 3 | 0 |
| 65362ad8a1fc6bc1ce9a3136491de670  | 0 | 0 | 3 | 0 |
| 0a547b7c6753208e2781ae8acc30cdd0  | 0 | 0 | 3 | 0 |
| 45a00ada948b367accadb7e1d9c4e45f  | 0 | 0 | 3 | 0 |
| 016db1954a465f41ccb0476863eb6816  | 0 | 0 | 3 | 0 |
| 220c4282cbf2addfa41f891cc83cfb30  | 0 | 0 | 3 | 0 |
| 153231bffcfa5f1f77526a4b74b75f3bd | 0 | 0 | 3 | 0 |
| 9d13276cf2d2b39f246af62420fefc6d  | 0 | 0 | 3 | 0 |
| 07f987e159a350b60a61f1bf243af1c2  | 0 | 0 | 3 | 0 |
| 5d65039a70813d595657a9825800ba67  | 0 | 0 | 3 | 0 |
| 2232716000a8b0de1471e3c5cbf313d3  | 0 | 0 | 3 | 0 |
| 0ee775d97f9283d952cd53229fbe11d6  | 0 | 0 | 3 | 0 |
| ae000968d5812a6bb6d4443c1878c24d  | 0 | 0 | 3 | 0 |
| 3bdf9de0c1f8a24a69827a4637318d40  | 0 | 0 | 3 | 0 |
| 63855f578206a43ec68d71d1c274d22b  | 0 | 0 | 3 | 0 |
| c1277cbe0d9aad22e74325e913a7822d  | 0 | 0 | 3 | 0 |
| 67a594d0f8f124e42d2cbe372e934532  | 0 | 0 | 3 | 0 |
| c9dd42b2aca393fd5b837adc723d5557  | 0 | 0 | 3 | 0 |
| ccfe1fce0298cc08dabfcf781676732d  | 0 | 0 | 3 | 0 |
| 118ae39c4ff54eb7f0e2c45acf776e7f  | 0 | 0 | 3 | 0 |
| bc606273eb83da4e1ebc3414d4f89528  | 0 | 0 | 3 | 0 |
| e01c0abb15fdc7107413c4cc71bea968  | 0 | 0 | 3 | 0 |
| ab877e02993c45870d9aa922bb295375  | 0 | 0 | 3 | 0 |
| acd1950ef1f6fdf2e5575721066a46b0  | 0 | 0 | 3 | 0 |



|                                   |   |   |   |   |
|-----------------------------------|---|---|---|---|
| 612527979ad219bcbe60c0e5680144e4  | 0 | 0 | 3 | 0 |
| f6876f7a66eb3939db75bdc0bbd6ae9c  | 0 | 0 | 3 | 0 |
| f19a5c3463b0594f807c0b5f352538f2  | 0 | 0 | 3 | 0 |
| 6a32bb1119485c308cc09ea70c8c0fd2  | 0 | 0 | 3 | 0 |
| 5bcb006d05373c6dd6a9ce440d9334c2  | 0 | 0 | 3 | 0 |
| 17ebb43e30f41b611fe626eac53fee61  | 0 | 0 | 3 | 0 |
| 805cf7fc5f5b6d269293b4767f7f5ac3  | 0 | 0 | 3 | 0 |
| 0afe4059e32679910645c0ad665515f0  | 0 | 0 | 3 | 0 |
| 531415342ac4aad9cc4e6f4f9ea56b69  | 0 | 0 | 3 | 0 |
| 25b5d37cabce96f067c1d04fa1ca56d3  | 0 | 0 | 3 | 0 |
| c2c83b73470ded5a0bff3d40993febbf  | 0 | 0 | 3 | 0 |
| df391c42977084f1bb35170714c439f2  | 0 | 0 | 3 | 0 |
| 7fb1bd743651af2d3d1cbac6776dd915  | 0 | 0 | 3 | 0 |
| 70b8ab1d1acd55f0a3c3eec8350a8d43  | 0 | 0 | 3 | 0 |
| 8288c5182d731db84f27f4ed94f61f9f  | 0 | 0 | 3 | 0 |
| e24f7244c1c05c5eff1f35cef8b7cca4  | 0 | 0 | 3 | 0 |
| b8b359ce61021620e6bbfc1371bda2e5  | 0 | 0 | 3 | 0 |
| b15ea9f9a4b026cc19d8e7ffdd3dbdf4  | 0 | 0 | 3 | 0 |
| 74ba9da31e37cdaa099a9efcda59c3a0  | 0 | 0 | 3 | 0 |
| ce01a9b8faa4b8db3d96aaad60eec690  | 0 | 0 | 3 | 0 |
| af4c9352f432d7abde9e0bfdaf06901b  | 0 | 0 | 3 | 0 |
| 4071fa17348e745d05b6a39ece5888b4  | 0 | 0 | 3 | 0 |
| 602d57f26449e7b10145afec3dd38100  | 0 | 0 | 3 | 0 |
| 2d8c082dc90f817cb7b737b0a5164afe  | 0 | 0 | 3 | 0 |
| 52d0bcdcf8f3ca70010b6e77c297fc3ae | 0 | 0 | 3 | 0 |
| 93a38335a64d81d6f03b9f6647ef9722  | 0 | 0 | 3 | 0 |
| 46f871804b7c3a31414f5e343bed49c5  | 0 | 0 | 3 | 0 |
| 314d16f1c899ca72cfd8824cb19e538c  | 0 | 0 | 3 | 0 |
| 2afe483f44f52895d52f212e0c05a725  | 0 | 0 | 3 | 0 |
| 73e3b47ffb0b022e94115b5acf820e0a  | 0 | 0 | 3 | 0 |
| b3eaae1ddaf3b09b7124086af46a76e5  | 0 | 0 | 3 | 0 |
| 6c015f6695114af32e1ede9e61f818a8  | 0 | 0 | 3 | 0 |
| 787eaba2c033e0e3eec8893951d60845  | 0 | 0 | 3 | 0 |
| 9d3da29453ad7480e3623aad148f872c  | 0 | 0 | 3 | 0 |
| c064377784edced672a6d397bd53291a  | 0 | 0 | 3 | 0 |
| 2779f4e18f50bbde391600f604277b67  | 0 | 0 | 3 | 0 |
| fc2347b84ab8e568d9be03b8138f9a6b  | 0 | 0 | 3 | 0 |
| 7e733ca76ae258ef19ecaf6930a376bc  | 0 | 0 | 3 | 0 |
| 86f5967902018af5016262c394cece51  | 0 | 0 | 3 | 0 |
| 334d152e267d51e151001275bbb312e9  | 0 | 0 | 3 | 0 |
| a12577ad410aa6d88139bbc7b83a3e14  | 0 | 0 | 3 | 0 |
| f90371440eb7cb009807a313a6dc4a60  | 0 | 0 | 3 | 0 |
| 8db0d59698dae1cc0486083fca9795e4  | 0 | 0 | 3 | 0 |
| 3aa498edcccdad558cd1e789c3e478cb  | 0 | 0 | 3 | 0 |

|                                  |   |   |   |   |
|----------------------------------|---|---|---|---|
| 97eb88f56e5d3fa0a3fdec7a82d466d8 | 0 | 0 | 3 | 0 |
| 3434f90399e7214b71cbbc8156cbd26e | 0 | 0 | 3 | 0 |
| 63a78d06cfa3b018b8204e23e5693eeb | 0 | 0 | 3 | 0 |
| 4be2c11887ef11e76830cf8a43896dbf | 0 | 0 | 3 | 0 |
| 621028e07451a95d9966eed8403e2cb  | 0 | 0 | 3 | 0 |
| 4dac939c4a3eb58e3caec5ea49fb53ab | 0 | 0 | 3 | 0 |
| 7131986f2085dda0cd47be0ba5f58d99 | 0 | 0 | 3 | 0 |
| 47304a727db3cea426bc0c6029425f80 | 0 | 0 | 3 | 0 |
| bc4aa84091a361a6737f9cc4a5673b06 | 0 | 0 | 3 | 0 |
| 30665512bfbbd5be4012ae72884a26c8 | 0 | 0 | 3 | 0 |
| 7c5a263e72ce4eaf6e6cee329b4b93dc | 0 | 0 | 3 | 0 |
| c6684326a2412d5959e8ac16c2450fb4 | 0 | 0 | 3 | 0 |
| a4c8e12f3a07c739461bface1f7b66b3 | 0 | 0 | 3 | 0 |
| 4e2c623811ad92e50cdaf06ec79c63bf | 0 | 0 | 3 | 0 |
| de8e305bdfad87052e8172bfe40a079d | 0 | 0 | 3 | 0 |
| 3eab02fb8687d8fe9c6e81a59dbfbaef | 0 | 0 | 3 | 0 |
| 1cf0727e6245ca72d65efe0861d88443 | 0 | 0 | 3 | 0 |
| 2adfdfe0162bfc8b3a4a57de17ba9bf4 | 0 | 0 | 3 | 0 |
| 1641afc33404034e87c426b08c95064b | 0 | 0 | 3 | 0 |
| 07a4ba4e3670a16b4a835fedce25de68 | 0 | 0 | 3 | 0 |
| f202b14a375137bd5fe95289bd2223d9 | 0 | 0 | 3 | 0 |
| 6cef4ef9381f3c25c14e8da5e8656385 | 0 | 0 | 3 | 0 |
| 60bca9ad9e93f32e3553dd510477e644 | 0 | 0 | 3 | 0 |
| 118feac92218a413e101c44c2f1831bc | 0 | 0 | 3 | 0 |
| 2c9afe12c846546041cf34248cc46a2e | 0 | 0 | 3 | 0 |
| 61c866b7adcd9bba5edf830daa5db328 | 0 | 0 | 3 | 0 |
| 3736ed13fc61a8fadc648df63e0cae10 | 0 | 0 | 3 | 0 |
| 7f841b0a6049fd2d1c5e7e3fcef779eb | 2 | 0 | 0 | 0 |
| bb64a4d5544bb9e00d8452d458bd0218 | 2 | 0 | 0 | 0 |
| f2a3c588aa4e5c6d96e1651b5886e0e1 | 2 | 0 | 0 | 0 |
| 86cd817606b0abb594a299c6c0d2ad0a | 2 | 0 | 0 | 0 |
| 813f5e8f6dfa78383a72982722fe0904 | 2 | 0 | 0 | 0 |
| a055aa79c7f5059e706ac9bf24041d89 | 2 | 0 | 0 | 0 |
| d9999e41a93a6a9206da5f48ddf11d37 | 2 | 0 | 0 | 0 |
| 570b6d73f3ccea2823539feafb71d0ca | 2 | 0 | 0 | 0 |
| 60b828d5fcd1d85ca0385f2aea67a3db | 2 | 0 | 0 | 0 |
| fb3f4528f105c23d911b4bd6d65c5966 | 2 | 0 | 0 | 0 |
| b368569bbc7b02cf81882c6bf8b0b126 | 2 | 0 | 0 | 0 |
| e2caff4a4ea41b536eece0f6a6b6997  | 2 | 0 | 0 | 0 |
| 8e210a6bd16922fdce5c8b42d362e4c9 | 2 | 0 | 0 | 0 |
| 4e264eca8ba2ae08497e0e919052030f | 2 | 0 | 0 | 0 |
| 700544304c5c91369d9b2b83e6f2ccd1 | 2 | 0 | 0 | 0 |
| 900534854ca91d33001d634280c55f23 | 2 | 0 | 0 | 0 |
| a7db5c22be85c73a972be1fbef790772 | 2 | 0 | 0 | 0 |

|                                   |   |   |   |   |
|-----------------------------------|---|---|---|---|
| 0f6383de6eb6e7f903ec5d493d11629e  | 2 | 0 | 0 | 0 |
| bf8d28587931dda3c5da64c4c6262762  | 2 | 0 | 0 | 0 |
| e17a4abaf6c268d23ccd4a1841333a9c  | 2 | 0 | 0 | 0 |
| 6f220a5ac2ce2684ce269508a59aef9c  | 2 | 0 | 0 | 0 |
| f977f8aa988f4aa5bd8af1afee1c34e1  | 2 | 0 | 0 | 0 |
| a2cad395c26e4486e83cd0b12c0d7b31  | 2 | 0 | 0 | 0 |
| 9605c968b337257e41cf29d3a81b4a03  | 2 | 0 | 0 | 0 |
| 75b0deb85ef5badd72ee5dfb3c77fc75  | 2 | 0 | 0 | 0 |
| 7be57c7067a161d241ae650fdc60a66a  | 2 | 0 | 0 | 0 |
| 008673bea686c070bf928483cfa94c49  | 2 | 0 | 0 | 0 |
| a1f5a6d1d377cfcf1b9fdfbbc73743e9  | 2 | 0 | 0 | 0 |
| 4bebc5b67db7cbcb60072343401f0889  | 2 | 0 | 0 | 0 |
| 685b059397676e1e31d683248028e8a9  | 2 | 0 | 0 | 0 |
| f984cad61ab0119410c334babc012884  | 2 | 0 | 0 | 0 |
| 58ed84b485c598960e3bfb24986b0a3f  | 2 | 0 | 0 | 0 |
| 36317cb7ab052df0e81e9bbc201b55fa  | 2 | 0 | 0 | 0 |
| ed5aebcf2070b771b7f74d0278ebc8af  | 2 | 0 | 0 | 0 |
| 3d73ac294254876dba1dc4d8c0fbd245  | 2 | 0 | 0 | 0 |
| fea05e1aa04acffe81209ecc539f3b22  | 2 | 0 | 0 | 0 |
| b4075fce230822a4071106424b85f370  | 2 | 0 | 0 | 0 |
| c2973a3a7d80c08f7dbf397c9736c81b  | 2 | 0 | 0 | 0 |
| 718a7ce890590632b2bdd458c06a79e4  | 2 | 0 | 0 | 0 |
| 4ad06b5fcf8a577c5ac33ed263954840  | 2 | 0 | 0 | 0 |
| 1d93cb56ebf9e1ba0bfeef21cd13f960d | 2 | 0 | 0 | 0 |
| c2bba546e4a978d1904b88bad248ba15  | 2 | 0 | 0 | 0 |
| 779c00d0954c43e8e1826355a1ed7adb  | 2 | 0 | 0 | 0 |
| 5791df4b70ceaccb5071d89f136cdfc   | 2 | 0 | 0 | 0 |
| 5d6b24734f432cc94957ef9b126ab73d  | 2 | 0 | 0 | 0 |
| a7ed419652eb62b3624ae50bd9eb0876  | 2 | 0 | 0 | 0 |
| 50be7b70fb32167b9aacc309b41fad4b  | 2 | 0 | 0 | 0 |
| c8d29642ffb31007618788d965a90637  | 2 | 0 | 0 | 0 |
| 094597572d7d9fab442f677ec1b4f1c9  | 2 | 0 | 0 | 0 |
| 3b84e9b0852690ae7552b6ac56fd74c3  | 2 | 0 | 0 | 0 |
| 05d65ee125a2600ca6d2a6651913fa71  | 2 | 0 | 0 | 0 |
| c9ebcdf0b63b2a8370ea591c9be5bbcd  | 2 | 0 | 0 | 0 |
| a43941fe9b6f90c2694e4e1bd01059b1  | 2 | 0 | 0 | 0 |
| efb1d86f6415311889c7faf5987cc20b  | 2 | 0 | 0 | 0 |
| 35e05790f940ad5fc54401788bea1da2  | 2 | 0 | 0 | 0 |
| f5a601d02037317809c1ff954ddbe497  | 2 | 0 | 0 | 0 |
| a7c22c5f891999970b08b2e1b4cbd4bc  | 2 | 0 | 0 | 0 |
| 8be449490a4877d30785e30a483fb586  | 2 | 0 | 0 | 0 |
| 4aefc0aa2ffc39b02b8a2f5cc9a6c951  | 2 | 0 | 0 | 0 |
| e8cac99715e99a9fb0aa8200eee24661  | 2 | 0 | 0 | 0 |
| e0989f2ad422c230d936b5478a308d00  | 2 | 0 | 0 | 0 |

|                                   |   |   |   |   |
|-----------------------------------|---|---|---|---|
| e695df0de5a26374454141c960db5abc  | 2 | 0 | 0 | 0 |
| 8b37276c1b4a13fe26ab1362bfa326f8  | 2 | 0 | 0 | 0 |
| c024fdc4b7caf6c80195187163ba4d20  | 2 | 0 | 0 | 0 |
| 56bcb98fd391d6f431d4c2ffb4574e1c  | 2 | 0 | 0 | 0 |
| e5e3468d1498241dc7ef9ed8bc238c37  | 2 | 0 | 0 | 0 |
| c532a5c1673307b44b06addc558a8271  | 2 | 0 | 0 | 0 |
| 403de7cfbeead2ae4b6266e3a9e34dea  | 2 | 0 | 0 | 0 |
| 48a6fd44ef04f154ab8848750720ebad  | 2 | 0 | 0 | 0 |
| 8909e61072addc4274d9ac69d75a54b3  | 2 | 0 | 0 | 0 |
| 3a5d2c52c1db3a838aee9697362ce73d  | 2 | 0 | 0 | 0 |
| eef82238b8cd63ec12e09d9ee5f8f6c0  | 2 | 0 | 0 | 0 |
| 80e01774603ae287d4a73a54c739b69a  | 2 | 0 | 0 | 0 |
| 7ddce8ffce885cb6f1f2b28ec1767c3c  | 2 | 0 | 0 | 0 |
| 08cd4e4a33959b3ea4b0f8513b27734a  | 2 | 0 | 0 | 0 |
| 9dc903d592c5a36aba582e1a8874f4a4  | 2 | 0 | 0 | 0 |
| b212ef922b160d664b1ee5b06df4fff48 | 2 | 0 | 0 | 0 |
| 25664690152864ad8661493b5ebe8869  | 2 | 0 | 0 | 0 |
| 636f0f6769b962e9367a962953882e54  | 2 | 0 | 0 | 0 |
| aa3a2111a84993fecf6fcf2f86d1218c  | 2 | 0 | 0 | 0 |
| 65df90a27ab23a0fb58b9443f4d79c9b  | 2 | 0 | 0 | 0 |
| 293382e2006c2203fc761156ab83540e  | 2 | 0 | 0 | 0 |
| 7b9ff1e556292a7ab01f46e49589ef56  | 2 | 0 | 0 | 0 |
| 35bcc5bbbb28d4c75fde8bc2a27f2ccc  | 2 | 0 | 0 | 0 |
| b5289f867a5112106dcdb35448cf6da9  | 2 | 0 | 0 | 0 |
| 588db619d860017464eb1936eccd2bc6  | 2 | 0 | 0 | 0 |
| 89ef30eb6e10ecba5a65175860816d43  | 2 | 0 | 0 | 0 |
| b4e9101ea2ecf4c314091e76657da4c5  | 2 | 0 | 0 | 0 |
| 999c782509725665d04471daa6803957  | 2 | 0 | 0 | 0 |
| 2499e47230e61dc72a27004cee566c1f  | 2 | 0 | 0 | 0 |
| 51eed9a0b6fb7a20c6e8710da4af68ad  | 2 | 0 | 0 | 0 |
| 4dac92ab086767217ffc583b8b2cdf29  | 2 | 0 | 0 | 0 |
| ed53569500a4a83827c058d1016de25f  | 2 | 0 | 0 | 0 |
| 3352f2fbc621afee55fe90706c72638e  | 2 | 0 | 0 | 0 |
| 024a593474e64a6778806f9100992e0f  | 2 | 0 | 0 | 0 |
| eca9797e519e352c0eb6e5bbbd52afb4  | 2 | 0 | 0 | 0 |
| 8fca27d854480b0358c25039c207464e  | 2 | 0 | 0 | 0 |
| b19be9f06c6279e36be280929140edcb  | 2 | 0 | 0 | 0 |
| 43d15ed27d0fb694364289cb047e3ea4  | 2 | 0 | 0 | 0 |
| 1583e4132a77be50f828b1a6937d0ae4  | 2 | 0 | 0 | 0 |
| 67c0b9bf569e9d5b2237420601b6374f  | 2 | 0 | 0 | 0 |
| d44602f62a3ddc546e146e947855a449  | 2 | 0 | 0 | 0 |
| f180367e960bed473118b74ad9b03b02  | 2 | 0 | 0 | 0 |
| 1735203b0eb5a38bde88ca927b16697b  | 2 | 0 | 0 | 0 |
| f2fd709b9956f6e66e0bb6e4a96ef9ee  | 2 | 0 | 0 | 0 |

|                                  |   |   |   |   |
|----------------------------------|---|---|---|---|
| 89a5cff40219fbf0706a9474abf0f02d | 2 | 0 | 0 | 0 |
| a8bf86fafe562bdf6d63f45a44fc8f34 | 2 | 0 | 0 | 0 |
| 7f6b28b55fdf3ac244a192384d9f39ff | 2 | 0 | 0 | 0 |
| 7511cbf32407e1a7b85bd27e068ff291 | 2 | 0 | 0 | 0 |
| a4a59bc4b7007bf0344b1a72daccb994 | 2 | 0 | 0 | 0 |
| 5a39882c77c930fde1c5c2412944e229 | 2 | 0 | 0 | 0 |
| aa0bc0b935a6eb8ca0035d7008d2e368 | 2 | 0 | 0 | 0 |
| dd7ef0290ff9d015f535b90c8cbf496c | 2 | 0 | 0 | 0 |
| dd990f2a8e7034e92926b3275d7a275c | 2 | 0 | 0 | 0 |
| 80d9266fcc2f3e256ac006c8467d9e86 | 2 | 0 | 0 | 0 |
| 6e4e255042ad135aa6a1be13769b5cc4 | 2 | 0 | 0 | 0 |
| 1a2dc85e4998adfe6741e25721c3f038 | 2 | 0 | 0 | 0 |
| 7cf561ecde4f37bce85d38b2d98b48dc | 2 | 0 | 0 | 0 |
| 8d55971c15b4398f739615cf8911528f | 2 | 0 | 0 | 0 |
| 55eb7d282112ecf8bb8b37c258d1c8b3 | 2 | 0 | 0 | 0 |
| 81520a3cf71cdb930342ce1088fa0b53 | 2 | 0 | 0 | 0 |
| e44165530248fae5e222594e9e1b458e | 2 | 0 | 0 | 0 |
| c32da8046ac96d40a6ff9b96a71a0a4d | 2 | 0 | 0 | 0 |
| b866dd919c3b6f84dd497dbbb58f729f | 2 | 0 | 0 | 0 |
| c8f62e364ab1d66aefd1b9f77cd75bbc | 2 | 0 | 0 | 0 |
| fab9a0680ef713e47e6ee5276b56ede0 | 2 | 0 | 0 | 0 |
| 52e83397ef13ae02edc23a7b06b33108 | 2 | 0 | 0 | 0 |
| edbcfd0b39d30eca62caf080c0da7c56 | 2 | 0 | 0 | 0 |
| a47de1204bdb732351a9028938c2a0c5 | 2 | 0 | 0 | 0 |
| bc09b54ae5433be8b69b65703ce70d60 | 2 | 0 | 0 | 0 |
| 7552dca28b47a285c1d6df0d888d039d | 2 | 0 | 0 | 0 |
| ebaab0aea406ac2a1cafdc8d725bb7cd | 2 | 0 | 0 | 0 |
| 4c9608203c0c6f86c25739cb4ddb1990 | 2 | 0 | 0 | 0 |
| 2cdf4be835d1958b7fe7e4f7168c4c91 | 2 | 0 | 0 | 0 |
| 92440d1c5c1c8c6d785e648f425a5bcd | 2 | 0 | 0 | 0 |
| 68640431c2c73daba3a0e8def78f3a4f | 2 | 0 | 0 | 0 |
| b104714c21d152dff391e8f359e7bb93 | 2 | 0 | 0 | 0 |
| 126ec9c2991c5d63e3b3cbfdec44a24b | 2 | 0 | 0 | 0 |
| 2719c3af075c6382b21572c1ab4d2542 | 2 | 0 | 0 | 0 |
| b489aae9b197e65ca2ea9c487b5c750c | 2 | 0 | 0 | 0 |
| e066120b8369d80bded8c8cd60a0fb52 | 2 | 0 | 0 | 0 |
| e87e46d83153bb2bdc048e032c9944cf | 2 | 0 | 0 | 0 |
| 5b5fc98b22aadd11340d3bd864251b84 | 2 | 0 | 0 | 0 |
| dfbc0bf32634881a60d90da9d6dd53bc | 2 | 0 | 0 | 0 |
| 684f1cd1a6aaef3d3798145d65edd26f | 2 | 0 | 0 | 0 |
| 7c2f998c41baf5b71c644d85c70b3406 | 2 | 0 | 0 | 0 |
| 920021c1e21ed5bc9ea02f0563e6f734 | 2 | 0 | 0 | 0 |
| 8b7adfe3b67d86c67ac0c3a2ea66ca09 | 2 | 0 | 0 | 0 |
| 66c9a4a8bbc6dc1fb250f87a8bfa17c6 | 2 | 0 | 0 | 0 |

|                                   |   |   |   |   |
|-----------------------------------|---|---|---|---|
| fa693dde8f749baa2d1e056c399fe490  | 2 | 0 | 0 | 0 |
| e06a18730ff27655bb3ca3d8d1ee9847  | 2 | 0 | 0 | 0 |
| 41415df13af73ccd00f08ca48b5151ad  | 2 | 0 | 0 | 0 |
| 0440fb0fd923cad8963dcb2f4f2615eb  | 2 | 0 | 0 | 0 |
| 445cc3231c0ceb44d474fd44a47128bb  | 2 | 0 | 0 | 0 |
| 7af5b59a237caf3131746774e720590b  | 2 | 0 | 0 | 0 |
| ca8ab6d4c6aa09e127803f999f080348  | 2 | 0 | 0 | 0 |
| 65e0217a2e36b9e365b37464fad72782  | 2 | 0 | 0 | 0 |
| 7b8b30ef5a8b72d51071ebcbf8cb33c8  | 2 | 0 | 0 | 0 |
| 5d148d3971e2d940b534b07e02976cc7  | 2 | 0 | 0 | 0 |
| b69c0969d7d58c753903499d8b5cb16f  | 2 | 0 | 0 | 0 |
| 8fd84d49676e7eba5a5ae5bc74084ca5  | 2 | 0 | 0 | 0 |
| ec65fa613727deefed1f69fd294099e1  | 2 | 0 | 0 | 0 |
| f3042bd7d9d84abe20b45e248ac4b09a  | 2 | 0 | 0 | 0 |
| fc17ec337ab3e201af2b5b7ab2d3e646  | 2 | 0 | 0 | 0 |
| 4a30af31398ae4d0593ef2cfd16aba0c  | 2 | 0 | 0 | 0 |
| 87b449c951beda8ca11ab3b81c5250ca  | 2 | 0 | 0 | 0 |
| 14824453cc373dbe6f69d8fe9f788b04  | 2 | 0 | 0 | 0 |
| 3ef347354afbdcfb6cf87693f0c2f0f   | 2 | 0 | 0 | 0 |
| 83fac1aa9ccdc638621e9b1cae7d7687  | 2 | 0 | 0 | 0 |
| d99dfe1642dc70e1fe5401f703021cf9  | 2 | 0 | 0 | 0 |
| 9d5f550282089203bce7040968b0ef9b  | 2 | 0 | 0 | 0 |
| b905ede7123522f9830c3fc8f909e5c4  | 2 | 0 | 0 | 0 |
| d494a10ecef683dbc4ebf167590c30a8  | 2 | 0 | 0 | 0 |
| 00b0e79292cde2e513072d9149208f05  | 2 | 0 | 0 | 0 |
| 8bf5243df961dbd3bafef3bf2892abac3 | 2 | 0 | 0 | 0 |
| 8d1327a4e7023eea4b26aaf4d0589f99  | 2 | 0 | 0 | 0 |
| 580005840a614791446d9b94cf5f5ddb  | 2 | 0 | 0 | 0 |
| 946c1650e8374ac506c0c4856f7aff2e  | 2 | 0 | 0 | 0 |
| 9a2a383581d7daaf13591eb0a562c04b  | 2 | 0 | 0 | 0 |
| 438595d0c7867d6091d55eef92d1c403  | 2 | 0 | 0 | 0 |
| f5cf6abeed333c9de7d396ab396ddd25  | 2 | 0 | 0 | 0 |
| 09657af8a082c4ca6e5164353c2dcf26  | 2 | 0 | 0 | 0 |
| c6f3ef199dc8aa49d2ed980f3a3f2a89  | 2 | 0 | 0 | 0 |
| d868598d48c0c7143cfd2bbf8136162d  | 2 | 0 | 0 | 0 |
| 30efcbf0ea0dc74eaa667963fbdfbfc0  | 2 | 0 | 0 | 0 |
| 4b6c512747f8a60d7bde826f787391c9  | 2 | 0 | 0 | 0 |
| 025e46d2b848de09be950a70d468b4dd  | 2 | 0 | 0 | 0 |
| 511c4679508927330436e171a0ae8703  | 2 | 0 | 0 | 0 |
| a997b213b89724670dc4df9c60de772c  | 2 | 0 | 0 | 0 |
| b13778e098cc69a1007d633cf63116fa  | 2 | 0 | 0 | 0 |
| 5702bb9b3ba46e1e44a26efae0e3ce61  | 2 | 0 | 0 | 0 |
| 1078be945a840fc201992849ac3a7a7d  | 2 | 0 | 0 | 0 |
| 7417d59af8ee25050d1d6069d4eeceb07 | 2 | 0 | 0 | 0 |

|                                  |   |   |   |   |
|----------------------------------|---|---|---|---|
| f6432df8553c493d843fe4e395142901 | 2 | 0 | 0 | 0 |
| d1e9c3e8931fe38ae2060016c3452a3a | 2 | 0 | 0 | 0 |
| 57bb881bf9a5c5f1e76b77f6081ecfb6 | 2 | 0 | 0 | 0 |
| 9d19b394933ff9a297943d08dd107182 | 2 | 0 | 0 | 0 |
| 666d2c32ea65c4058b19722bd1c4db05 | 2 | 0 | 0 | 0 |
| dbadfc1b1273bcdba169796d6d29b0f9 | 2 | 0 | 0 | 0 |
| 32d6bee8a4fa90e5008e9a8ee15dc105 | 2 | 0 | 0 | 0 |
| 5af8d23fb3b8d03a97362dfe70809108 | 2 | 0 | 0 | 0 |
| c003a2246d37421e4cf3f795c901edeb | 2 | 0 | 0 | 0 |
| c6c74514b9d36e85eb52e5b3ec11b227 | 2 | 0 | 0 | 0 |
| d1964ce38163867690681e90d8a2d611 | 2 | 0 | 0 | 0 |
| f3084e0163bde62f7a6bcf67e31c43f8 | 2 | 0 | 0 | 0 |
| 34520674562a9e6bc92199d744441a82 | 2 | 0 | 0 | 0 |
| 00e61ac49039f2672779e9026df6c3d1 | 2 | 0 | 0 | 0 |
| 9d3e60e17d905bf8d1649f6f1b068f3d | 2 | 0 | 0 | 0 |
| 672a6ae3e6d23bae1157c323dd3cf6dd | 2 | 0 | 0 | 0 |
| ddbba7e3d96434fa22cb480c611810d7 | 2 | 0 | 0 | 0 |
| 71ca4c18c0b831d182dd6359880b26c1 | 2 | 0 | 0 | 0 |
| 6e42888c2c3a381c0b4c8afc19e90d9d | 2 | 0 | 0 | 0 |
| 5e3eda90966bf5dc85959a06064d7bb1 | 2 | 0 | 0 | 0 |
| ae073d016ba0050c296dc37c657b6ad5 | 2 | 0 | 0 | 0 |
| b745577a32cd12d774f43f5255318f44 | 2 | 0 | 0 | 0 |
| c64d31b790d8cf1fb89b05763d1d587a | 2 | 0 | 0 | 0 |
| 9ddc670b7c788bfbe576de37ca835776 | 2 | 0 | 0 | 0 |
| c6c1de2dfcb8786d1da81e9fe84d77f3 | 2 | 0 | 0 | 0 |
| eb3b0cf1f248a831e52d7b6ba68d247b | 2 | 0 | 0 | 0 |
| 4165650a819bd7f961334f1b417b31bd | 2 | 0 | 0 | 0 |
| 8b645faa007fd488715901dd66ddec03 | 2 | 0 | 0 | 0 |
| e3cd601465d9809a33eab4f72cba65a6 | 2 | 0 | 0 | 0 |
| 8334e815ee85ee7ec677b015235ef55f | 2 | 0 | 0 | 0 |
| 3753a135fc66a53572b353262a2f8d11 | 2 | 0 | 0 | 0 |
| 1a7e94d41e08d5be577e4630690b8bc6 | 2 | 0 | 0 | 0 |
| 3499c94d6c228280bc9ee0d42bb6a543 | 2 | 0 | 0 | 0 |
| 3dafb9c2f30a3891e52672d3b0e00e66 | 2 | 0 | 0 | 0 |
| 7b2c6e3ab8c32d444fa4d4bdfbc9011a | 2 | 0 | 0 | 0 |
| 02e710e7a7b58a03bd1d71a25b2798bc | 2 | 0 | 0 | 0 |
| f4874eab6671af901df79ae66e2931cd | 2 | 0 | 0 | 0 |
| f0405051943b770f1df42aec7e3ef19a | 2 | 0 | 0 | 0 |
| 1b5b831e0e79f22bf06e149190e27e10 | 2 | 0 | 0 | 0 |
| 77eae595bc7a65860737103f95b824db | 2 | 0 | 0 | 0 |
| 4c13545df5db5257e5972ac66b8ec62d | 2 | 0 | 0 | 0 |
| 26915d263f50bfc0e07a9ae67405ed78 | 2 | 0 | 0 | 0 |
| 284114a12916c3d09cce9e35c4fd9472 | 2 | 0 | 0 | 0 |
| 154199a222db636b8f8d9b8e64c6729a | 2 | 0 | 0 | 0 |

|                                  |   |   |   |   |
|----------------------------------|---|---|---|---|
| 86298bbade409d463fd7c5cf006299fe | 2 | 0 | 0 | 0 |
| 6ae442c8dee6568e6c7c8d506a2a8d3e | 2 | 0 | 0 | 0 |
| 129836f9e82c85539867a7dea1815051 | 2 | 0 | 0 | 0 |
| 6900f20cdee7f01c7a1e711ca87ed194 | 2 | 0 | 0 | 0 |
| 33d2be3acfec1ea5a195417910ff3c7c | 2 | 0 | 0 | 0 |
| eeb123fea8f40890c3ae3c716b4381ff | 2 | 0 | 0 | 0 |
| 1a2a3550d9514bc399820628cc09b323 | 2 | 0 | 0 | 0 |
| feba4e5991f20e8bd1307888b17bea47 | 2 | 0 | 0 | 0 |
| 0762f36b8f81ef9a4579a23cddf0ea93 | 2 | 0 | 0 | 0 |
| 1150f2a9da8b9532303648ba13321381 | 2 | 0 | 0 | 0 |
| b5252dcb002201c78573e86577c110ab | 2 | 0 | 0 | 0 |
| a5b70808a25111aec7ef3ec7c275e803 | 2 | 0 | 0 | 0 |
| 2932fe98e03c9e8db1984f5a8aa63263 | 2 | 0 | 0 | 0 |
| 9ab8cf8b01c3b49601c2c7b12e017e29 | 2 | 0 | 0 | 0 |
| 2226268bc0a9fb2c2b5b66bf6ddd565a | 2 | 0 | 0 | 0 |
| 65c35e5e45a6d28b62ba443b81428295 | 2 | 0 | 0 | 0 |
| 3d373b5fe2e194fcce98f69078a1d95a | 2 | 0 | 0 | 0 |
| 1b528bd21680aa707e076d14ef042412 | 2 | 0 | 0 | 0 |
| 66ba4c318bc553ea16bb5aa86ec9df3f | 2 | 0 | 0 | 0 |
| 673b95018dca64d866857232eed6d52c | 2 | 0 | 0 | 0 |
| 3d8fa0b42f7f64368634db0950ca56e6 | 2 | 0 | 0 | 0 |
| c03c925af13955beac1453b0a67e7a83 | 2 | 0 | 0 | 0 |
| a1f7b2c5eb51c06ea651e514302efd23 | 2 | 0 | 0 | 0 |
| f83cc229a8527801b600b773f979963f | 2 | 0 | 0 | 0 |
| 2a840d693f6b967de7c8b31075de441d | 2 | 0 | 0 | 0 |
| 2d1c390e076e3452c0994375c3a3c3fe | 2 | 0 | 0 | 0 |
| 06656c3f258e2f3fab30879cd3ef77d9 | 2 | 0 | 0 | 0 |
| 82dae005620c184bcc782efe1a122cd0 | 2 | 0 | 0 | 0 |
| 98d8d72bbc00c9d21e3a842cf6a1d1fb | 2 | 0 | 0 | 0 |
| 955a4821d494c40166a0c47a8e93d4c8 | 2 | 0 | 0 | 0 |
| ae09ce2a5585cae8def25d1f88d6b068 | 2 | 0 | 0 | 0 |
| d3e90c2aaec39617663f728c29382fbf | 2 | 0 | 0 | 0 |
| acfa91b73b556543381d22feaff7161c | 2 | 0 | 0 | 0 |
| 028a3d657d616252811cd5a623064bcf | 2 | 0 | 0 | 0 |
| 8739ce4267bdeff36d4c447d2750acd3 | 2 | 0 | 0 | 0 |
| 29809e9492ea2e318a1bc55788acae0e | 2 | 0 | 0 | 0 |
| 11bd20a2f87b4d5a31c304906437f9e2 | 2 | 0 | 0 | 0 |
| acb833669b6c570cb119fcd2e8985aec | 2 | 0 | 0 | 0 |
| c6307debb4526e64c17ef53e528ce4ba | 2 | 0 | 0 | 0 |
| e2435d86321d3daafba609b4921504b4 | 2 | 0 | 0 | 0 |
| 8345643e9e3a8fbde15c24f49f352a68 | 2 | 0 | 0 | 0 |
| e506050d3486d9fb88bbbb71c19a0a8d | 2 | 0 | 0 | 0 |
| 0d19c5e52e6b5a801db636a94c3a0130 | 2 | 0 | 0 | 0 |
| 975ae64d54f493d5e574019b9a67a706 | 2 | 0 | 0 | 0 |



|                                   |   |   |   |   |
|-----------------------------------|---|---|---|---|
| c700280aec2b4663f81ee6c0012ebe2f  | 2 | 0 | 0 | 0 |
| df9c9f0febed57a4c6ae7a14a299c4c5  | 2 | 0 | 0 | 0 |
| 9cb3872c216ad779699489c93e9c7d0a  | 2 | 0 | 0 | 0 |
| cdeeed14a7fd32766036748b5b071b4a  | 2 | 0 | 0 | 0 |
| a779624afae9cb44eb1f8bf29d0f8f82  | 2 | 0 | 0 | 0 |
| b7e1c8e4c769b7c5936cfc130b6b1a35  | 2 | 0 | 0 | 0 |
| fd1d06c3a39b9989c1138adef624f190  | 2 | 0 | 0 | 0 |
| d723a15f23d123fe6be7e7f4c222273   | 2 | 0 | 0 | 0 |
| 7824db0d5706d29ed301bc90306df391  | 2 | 0 | 0 | 0 |
| 238e6dccc422286aa9c8a019c9f548d9  | 2 | 0 | 0 | 0 |
| 1ac6a99bb6d3ce7016b6bf74e33f2849  | 2 | 0 | 0 | 0 |
| 768b1a7817cef35dc51704d8274127c4  | 2 | 0 | 0 | 0 |
| f2155556151e66cccfb1220f354bdcdc  | 2 | 0 | 0 | 0 |
| 194a2ce4ac3a3587f10d3a5680e4fa93  | 2 | 0 | 0 | 0 |
| 6dbefac854e3232dabef05b7766666bd  | 2 | 0 | 0 | 0 |
| 74a586bd4cd53952443fdeb7e6989660  | 2 | 0 | 0 | 0 |
| 367d51b572f82bd7f8d1a498cb860ba4  | 2 | 0 | 0 | 0 |
| 1e0ac30a283f64ed8e93762a75159241  | 2 | 0 | 0 | 0 |
| 72a9a16d4a3f911ba0e15b6210e49b04  | 2 | 0 | 0 | 0 |
| 5514c1fa16d011b863844573f8f08728  | 2 | 0 | 0 | 0 |
| 110aaaad5b87c00f9b47e91ce033fea6  | 2 | 0 | 0 | 0 |
| b14827f1aee5811e243b7446dcd876b6  | 2 | 0 | 0 | 0 |
| 908ec218f82aafdd5c29d61b7ff7b9ab  | 2 | 0 | 0 | 0 |
| ea3d919d47ea45745845e547560a41d1  | 2 | 0 | 0 | 0 |
| a4488bf393f196c8038adb0d76553d77  | 2 | 0 | 0 | 0 |
| 132128fb7fc57bdc300f1a7d30f1ed32  | 2 | 0 | 0 | 0 |
| 5d938a2a1542bdfdb28e215030514001  | 2 | 0 | 0 | 0 |
| c6becc6ee28cf1cae5489622f2a57b8f  | 2 | 0 | 0 | 0 |
| 03bf3f096d10cfc88dea723dd183e5c2  | 2 | 0 | 0 | 0 |
| c4d87c40eb8dd61bb1466af7c941a1af  | 2 | 0 | 0 | 0 |
| 97aca4aba4da3e0294a2ae9c2aa9400b  | 2 | 0 | 0 | 0 |
| 6f3d6abc9a7c92c22461956d0eb6fd1b  | 2 | 0 | 0 | 0 |
| af65bacba1d211a83e03c434f954352a  | 2 | 0 | 0 | 0 |
| 54705d0174b6a683991515804b025b70  | 2 | 0 | 0 | 0 |
| 19d7e6f37604c7dd4b3ec4a82bb205    | 2 | 0 | 0 | 0 |
| 3afc2a2166de9880ca26e3e962df15a6  | 2 | 0 | 0 | 0 |
| d8cbafec3fdd51d1a7db919dc335d059  | 2 | 0 | 0 | 0 |
| ebd7006cf5d06215b21b053954e7756f  | 2 | 0 | 0 | 0 |
| d58b37b1c118c04744a695ec19a0658f  | 2 | 0 | 0 | 0 |
| d06fefad04d34ef1089dc2b9bfff282a3 | 2 | 0 | 0 | 0 |
| 55013166a932ff1875f3d798e21deae1  | 2 | 0 | 0 | 0 |
| c658505c43491bcd63ee6a14aa5a3a95  | 2 | 0 | 0 | 0 |
| 9795db886f86892dcf10e658653788b2  | 2 | 0 | 0 | 0 |
| 37cb7057672e1a656ea80252c55b76d4  | 2 | 0 | 0 | 0 |

|                                  |   |   |   |   |
|----------------------------------|---|---|---|---|
| f4d7b63f89b350b81dd1eabf001abfdc | 2 | 0 | 0 | 0 |
| 676c548b11180859f4b9cf898c37baea | 2 | 0 | 0 | 0 |
| 1b3fe5f4b280674a993671998d34a5a3 | 2 | 0 | 0 | 0 |
| d4240c46f6c582c2a8572097f88a2f96 | 2 | 0 | 0 | 0 |
| 5d9d635016975af1ab66ca68d4b9c1c0 | 2 | 0 | 0 | 0 |
| 3824f9e0a64113a65c37dfa77bbeb8d5 | 2 | 0 | 0 | 0 |
| 143a025f6b9a820e88721a7249433238 | 2 | 0 | 0 | 0 |
| 7adfdba76ad0dfb42c1499f8636d0097 | 2 | 0 | 0 | 0 |
| 513d22056d8ed1619ae38aa9aeb3a975 | 2 | 0 | 0 | 0 |
| 5b8a63ae3e37cc20cec35c8971802384 | 2 | 0 | 0 | 0 |
| 53ca1b79cf9e3d27d41480a43f31608a | 2 | 0 | 0 | 0 |
| 8ea2b3f2b453fd343166cd45ccb63c28 | 2 | 0 | 0 | 0 |
| 3f46326cb0367eb8509f6c93dc5a1e86 | 2 | 0 | 0 | 0 |
| 6d76416b3c8c538357a0b789baf2a6fb | 2 | 0 | 0 | 0 |
| 190cec728775617aaf239565e946ac24 | 2 | 0 | 0 | 0 |
| d6fa3b6aef2b4808c0905aa15a744ddf | 2 | 0 | 0 | 0 |
| a1eaaeb2116b4746ebdfa1315bdc2f68 | 2 | 0 | 0 | 0 |
| db55592df5612d142c98167517e4f0b3 | 2 | 0 | 0 | 0 |
| bcb75f9f1bad768cb8785cd6d632e18d | 2 | 0 | 0 | 0 |
| 7bdd3b7b705a9b4fd84aba57b491a233 | 2 | 0 | 0 | 0 |
| 7ef460c006dd409efba40c4ac58adc5b | 2 | 0 | 0 | 0 |
| 1d5ba64822bf25912c3aaa97ea6459be | 2 | 0 | 0 | 0 |
| e43366f418979f398d5b3b43d7551f5d | 2 | 0 | 0 | 0 |
| 70402e1a447c76824c22c50e9e7444c7 | 2 | 0 | 0 | 0 |
| fe6d45a7c2c0149dac6046c374a2dccb | 2 | 0 | 0 | 0 |
| e728f0f060a6e9bf7f722d276d9d075b | 2 | 0 | 0 | 0 |
| 3c726840fcd05a1eefa481b46528bcde | 2 | 0 | 0 | 0 |
| ff719bef881e3cbe9ca8ab75ad43b1e9 | 2 | 0 | 0 | 0 |
| 94a763ea9db80c9862344e341e710748 | 2 | 0 | 0 | 0 |
| 044f8c00dac71b068cb6ed77c009b409 | 2 | 0 | 0 | 0 |
| b48a83bccab9762c15d49ef2d06fe547 | 2 | 0 | 0 | 0 |
| 103884b94da30adfd97c993b29a5661a | 2 | 0 | 0 | 0 |
| 9bcc6c6e970d2f4f10710165cd6ab2bf | 2 | 0 | 0 | 0 |
| f119fda6c1e1fbd4c692054790e7008d | 2 | 0 | 0 | 0 |
| 7510f37f6f9ab4db1c08179640c2d31e | 2 | 0 | 0 | 0 |
| 736cf58bbbfe6cb177a8aec5edf205ca | 2 | 0 | 0 | 0 |
| 43e45773811ff029d56fa69751c9e6c6 | 2 | 0 | 0 | 0 |
| b959c930d0de8dbe58b253704042038e | 2 | 0 | 0 | 0 |
| 5223102eff5a2277b1fafca00f2870a7 | 2 | 0 | 0 | 0 |
| 134da64248360ad448fa6b77ec892593 | 2 | 0 | 0 | 0 |
| d6dd8263875b47ca3dc35902d721c94d | 2 | 0 | 0 | 0 |
| 9f82731d291a7280ddcfdb730a4966ea | 2 | 0 | 0 | 0 |
| 4d3892916bec854602af82d00dea169d | 2 | 0 | 0 | 0 |
| e778cb1f4bc4aeaf2d3a7e0185b6e847 | 2 | 0 | 0 | 0 |

|                                  |   |   |   |   |
|----------------------------------|---|---|---|---|
| 2eba42ccbbc81800aa4a303d72c11468 | 2 | 0 | 0 | 0 |
| 9bc6442b4971d69dd39ef6ded7ee8866 | 2 | 0 | 0 | 0 |
| 749e1d2060069e02cef9e4e81839d3b6 | 2 | 0 | 0 | 0 |
| fdd17e68f6de3b12b9f9bd2af9a60d69 | 2 | 0 | 0 | 0 |
| 79db6cd2951b5ca9bc0614c8c86d6152 | 2 | 0 | 0 | 0 |
| 3c53e5ceca577a3c6b194c2074d2eafb | 2 | 0 | 0 | 0 |
| ea523621c45be4504f33438d38e1d842 | 2 | 0 | 0 | 0 |
| 94f3b99c1cf605aa0ee4fb922d6f2fad | 2 | 0 | 0 | 0 |
| f48b213c29c705728e0a34fb0daaa759 | 2 | 0 | 0 | 0 |
| 2ce28b0f7157036711b3dc8f219a5920 | 2 | 0 | 0 | 0 |
| 0d642502c97412164751b45a32e8a4b0 | 2 | 0 | 0 | 0 |
| e127cbf7cf93b3b143ce5b7e78d68593 | 2 | 0 | 0 | 0 |
| ae57bf7d70b4e237b8ee374054051da2 | 2 | 0 | 0 | 0 |
| e54eba309bed75a4d5d67dc015266321 | 2 | 0 | 0 | 0 |
| b75c199728db9bc634f479dac26a6409 | 2 | 0 | 0 | 0 |
| 8c5d7b5e8e82282957b1b9006578edcd | 2 | 0 | 0 | 0 |
| 098b5841b926599ac1feb29a08ac9b10 | 2 | 0 | 0 | 0 |
| 3b9e8f6d50b8f92dae53f5dba34ff065 | 2 | 0 | 0 | 0 |
| 33f31312f8fd530407f9ae4070349f1  | 2 | 0 | 0 | 0 |
| 24c43f93f565574cde5cc237381ee331 | 2 | 0 | 0 | 0 |
| 518151ce13ac60648d459dc8f269d38d | 2 | 0 | 0 | 0 |
| 1e3ea475b0c264780e5280863e9280f9 | 2 | 0 | 0 | 0 |
| 839d46cd488f85c56af76df6faa6d218 | 2 | 0 | 0 | 0 |
| 6d262a12013924415b7985c65a7dd39b | 2 | 0 | 0 | 0 |
| 214fb5239f8d41b5346f02e0524ecb67 | 2 | 0 | 0 | 0 |
| a2d8bef7703d4ad3e3298ee5779c4149 | 2 | 0 | 0 | 0 |
| 665c5270a97a0a07e0436ddf715d9ed6 | 2 | 0 | 0 | 0 |
| 12683e106f450c99b4ebab36ad438799 | 2 | 0 | 0 | 0 |
| 9dd771137f8132c746dcb18ab7098503 | 2 | 0 | 0 | 0 |
| 52ddd71870367fb4ef8c57efa6abcf71 | 2 | 0 | 0 | 0 |
| 842116693978ac28c1f61eb906a2b119 | 2 | 0 | 0 | 0 |
| 705da82efd1a9105a436e45fcef109a5 | 2 | 0 | 0 | 0 |
| 00faebc94fad3a564752bd4bec1dd2e4 | 2 | 0 | 0 | 0 |
| cba12a35459a5be65e04b997dd00d5c3 | 2 | 0 | 0 | 0 |
| 33901e80233deedfa7fd3862ee2d015c | 2 | 0 | 0 | 0 |
| 4d1a58ce877377533a266bfb312f2b65 | 2 | 0 | 0 | 0 |
| e64309057cfb04de65198c1f23c801f6 | 2 | 0 | 0 | 0 |
| fa8dc4d3f18766648b3dede4364172a5 | 2 | 0 | 0 | 0 |
| bcecf8ec1e9a85a4435046cd2d6f2d31 | 2 | 0 | 0 | 0 |
| 11c538eb6fab67e104d32864b9153a63 | 2 | 0 | 0 | 0 |
| 402699252a3387575730e30153174e30 | 2 | 0 | 0 | 0 |
| 5382b7a7a6dc6f37fc5fb814ceaf5f09 | 2 | 0 | 0 | 0 |
| e5e869aa534a5f55c6e6c8611b75704c | 2 | 0 | 0 | 0 |
| 3cb666f89f5eb76c2d1d302dc3519477 | 2 | 0 | 0 | 0 |

|                                   |   |   |   |   |
|-----------------------------------|---|---|---|---|
| 4980b5ed86a96df59d11181fbe71f037  | 2 | 0 | 0 | 0 |
| f9509c2a0a3ae31ec1cbef167f39d755  | 2 | 0 | 0 | 0 |
| 6607d7f0c004aa15f90e3b17ba397f75  | 2 | 0 | 0 | 0 |
| 36c53beb906fc56b61cf2df001be602a  | 2 | 0 | 0 | 0 |
| c2e9d456422a6db66bb5c7df45a6b1ba  | 2 | 0 | 0 | 0 |
| 140cc6bcfbde61c8e950b71b08321f38  | 2 | 0 | 0 | 0 |
| c0e8f3a1a4685e42f3ecdfeccadd19bf8 | 2 | 0 | 0 | 0 |
| 0066ece89017f6c5b7a5b1bddabfe9c5  | 2 | 0 | 0 | 0 |
| 3769f4dfa103d1f48d708b4ca188896d  | 2 | 0 | 0 | 0 |
| 81647391b330407f43ccbe98d074df32  | 2 | 0 | 0 | 0 |
| 2e59feb062f08fdd2f24eb3c71027f33  | 2 | 0 | 0 | 0 |
| 1a4f48c3e62eec8ce28048dc91017287  | 2 | 0 | 0 | 0 |
| 9dd2c8edf4c1e885f8250576b6f7e7d0  | 2 | 0 | 0 | 0 |
| f38250c981243c8878941f2a266645d5  | 2 | 0 | 0 | 0 |
| 85b51c6554de56e821ac69b26c19b451  | 2 | 0 | 0 | 0 |
| f32c6d544d6ee09875e7cc6e41aee2e7  | 2 | 0 | 0 | 0 |
| 7c676983bf3794f880635c3b9a066d1f  | 2 | 0 | 0 | 0 |
| 337e377a80b0600f28faa84d3eb2d43c  | 2 | 0 | 0 | 0 |
| 03306302980b710e5db7fb941837e01e  | 2 | 0 | 0 | 0 |
| 40c07849c9fbce5934a3a7f751c25181  | 2 | 0 | 0 | 0 |
| cc21a7539b6ea6329d8cac8e298125c7  | 2 | 0 | 0 | 0 |
| f12e22d88d30f0b0a26593368a04e742  | 2 | 0 | 0 | 0 |
| cd46aed6e991b7212aef685d5f1502e7  | 2 | 0 | 0 | 0 |
| 95a6d352cbce266473dbb774bdc75215  | 2 | 0 | 0 | 0 |
| f107c1f35be9f97774a30977f6b4649e  | 2 | 0 | 0 | 0 |
| 56593b2157afa3fd48d45ebf4cb8c409  | 2 | 0 | 0 | 0 |
| 560667d48d243998d5293c333cd940da  | 2 | 0 | 0 | 0 |
| db67337f1043045fb1334aca1c8ecf70  | 2 | 0 | 0 | 0 |
| b3d05544a905bcc1a9b9c20182ee0994  | 2 | 0 | 0 | 0 |
| fea665f76fbfa7e5e9bfbfd52c2e0b8c5 | 2 | 0 | 0 | 0 |
| 4630e4e20fab39b05f469a5e6e9e408e  | 2 | 0 | 0 | 0 |
| aea54ea33c2451eb3645d7553ef8e241  | 2 | 0 | 0 | 0 |
| e626da723930dc4758abbb846fdf4b4a  | 2 | 0 | 0 | 0 |
| b2de139c1795a1382999d8d182e9553d  | 2 | 0 | 0 | 0 |
| f73493597392d1211ab181f3bf711296  | 2 | 0 | 0 | 0 |
| 4770674ed356020e5473d748dcf27ae1  | 2 | 0 | 0 | 0 |
| ae407ea8985e55e7279e34378953f166  | 2 | 0 | 0 | 0 |
| 81f6ac196c593ed43e0447ea5c65468f  | 2 | 0 | 0 | 0 |
| b48cc8025905bb858b59e586015e3385  | 2 | 0 | 0 | 0 |
| d4a8c5f017d914d19b7b5dd76c98e815  | 2 | 0 | 0 | 0 |
| d3f4bccca0e68034d43955564bc464d45 | 2 | 0 | 0 | 0 |
| 011c677e998bdea8d6a3b2e8922c9423  | 2 | 0 | 0 | 0 |
| 33599a4c285a5015347dad2871bec3e6  | 2 | 0 | 0 | 0 |
| ad914ba9bbd71a5248839d906a343ba2  | 2 | 0 | 0 | 0 |

|                                   |   |   |   |   |
|-----------------------------------|---|---|---|---|
| f424511da5edc134ad7868b35bf8858e  | 2 | 0 | 0 | 0 |
| 2101525189891ba2ff3140da3615bcb5  | 2 | 0 | 0 | 0 |
| db26bf0624f07aefe5d5aa2655c5696b  | 2 | 0 | 0 | 0 |
| 6548617e9c30d2dc08cced95426fe8be  | 2 | 0 | 0 | 0 |
| b93d8855865a1f11d35430c8e380ba67  | 2 | 0 | 0 | 0 |
| 718f72aa47113745faa8aaabcca40fed  | 2 | 0 | 0 | 0 |
| bd43dbf509037fb1a428413fac2bf5af  | 2 | 0 | 0 | 0 |
| 2492ca41a970bb85e2b7403b7f072a82  | 2 | 0 | 0 | 0 |
| 3d6818b2baa26f75785432b23fe188db  | 2 | 0 | 0 | 0 |
| f6ba1a26415a0a6eb6914c867b66df36  | 2 | 0 | 0 | 0 |
| ef29dd9ebbcf118cce3ff306884daf26  | 2 | 0 | 0 | 0 |
| c354ba3da21efc4af7ed5512df2bf018  | 2 | 0 | 0 | 0 |
| 7731fe7466717cc0ba736e4d385263bf  | 2 | 0 | 0 | 0 |
| d5081445c6f355c35dc36ef8084c744b  | 2 | 0 | 0 | 0 |
| 2641ab1cd8ac56e7208a21178279e714  | 2 | 0 | 0 | 0 |
| fa82e7057df420fd2ee289d70c082231  | 2 | 0 | 0 | 0 |
| f322dc2f01f7842ac2dc55795486b3b2  | 2 | 0 | 0 | 0 |
| 71c5b20aabcb27e520e555e8a7a7319d  | 2 | 0 | 0 | 0 |
| 10a6939c38c2a3368115d5f40e021693  | 2 | 0 | 0 | 0 |
| 5588be66774b1c01e310daa59a9960db  | 2 | 0 | 0 | 0 |
| e2539e4b6e19c22bc607528eb28a9aeb  | 2 | 0 | 0 | 0 |
| 5680913b36abf77f3670b3f0e72684f5  | 2 | 0 | 0 | 0 |
| d19ccd978ceacfc23d41c0ff8197ce3f  | 2 | 0 | 0 | 0 |
| f8a1a20d092e5d8dfffa5d397d2eb586b | 2 | 0 | 0 | 0 |
| 46f250c1161de231b41a4da7f4f4a3c7  | 2 | 0 | 0 | 0 |
| d42989a3bb80d1c37cc369b50168ee44  | 2 | 0 | 0 | 0 |
| 8d91755b6906f6e072a4677b36837099  | 2 | 0 | 0 | 0 |
| 53c23b64eb5ecd61d0beb18a54e52171  | 2 | 0 | 0 | 0 |
| 9e3de1fa6bd8961258ad5c9f85f89369  | 2 | 0 | 0 | 0 |
| ba0c0f84ee7b3bba170ec6147e2bc81e  | 2 | 0 | 0 | 0 |
| 553faa92f43669b8a43a42ec53013322  | 0 | 0 | 0 | 0 |
| 93ec42469062de2efc8a87f71ca3c1d9  | 0 | 0 | 0 | 0 |
| 9e3471366cbe6c37353213629f7fef0a  | 0 | 0 | 0 | 0 |
| 59d39460096a2c8b0009ce4fb98edbd   | 0 | 0 | 0 | 0 |
| 1e0fb3f2432d702a892f9d73a6cbc81f  | 0 | 0 | 0 | 0 |
| 63455f122a5b62f4cc8b0bcf9bded2c0  | 0 | 0 | 0 | 0 |
| 02c75f994552cf00bed254b41d19a4a3  | 0 | 0 | 0 | 0 |
| 2486f1c353471374fa1bf337e6bd3aa3  | 0 | 0 | 0 | 0 |
| e05d6d90605beff2fdf1f0b5e06a9dda  | 0 | 0 | 0 | 0 |
| 3d73b8fffc3f4b873ae6447ed5ce057c  | 0 | 0 | 0 | 0 |
| f84d676fc3c19824dd00fa91e1a4025a  | 0 | 0 | 0 | 0 |
| 5674f740ced7825b9e5e56ae2c142577  | 0 | 0 | 0 | 0 |
| 69f311a7692c37ed16c73abbb53801e7  | 0 | 0 | 0 | 0 |
| 7a1de6c3882d5aa7ba5fb21fedfe6358  | 0 | 0 | 0 | 0 |

|                                  |   |   |   |   |
|----------------------------------|---|---|---|---|
| 0fe922014df56ba1403ec9af3751fe8a | 0 | 0 | 0 | 0 |
| 7b33d1c68d11b025d9e5195c119492c8 | 0 | 0 | 0 | 0 |
| 7558c558c3de726615b583483953f791 | 0 | 0 | 0 | 0 |
| 3905fd663e2fd9b3102fe71c85fdacd4 | 0 | 0 | 0 | 0 |
| 03ff5e3ba8dd3cf5f374c96252b6baa0 | 0 | 0 | 0 | 0 |
| dff3d0434424662a3f7cc7b83c9003c5 | 0 | 0 | 0 | 0 |
| ab31496f7071f72ab49be84bb15ccb2d | 0 | 0 | 0 | 0 |
| e97a7c02be2fffc33c41dc089d15fb50 | 0 | 0 | 0 | 0 |
| ffc76ed7c2cd4711566f6e138fb26c28 | 0 | 0 | 0 | 0 |
| 76a6b13fb4be7c1a854205ee030935e1 | 0 | 0 | 0 | 0 |
| 8ab045076a720a00343f65bcdf8d9ac8 | 0 | 0 | 0 | 0 |
| 5d9ca05b55edff8b8fca5bfc791df74b | 0 | 0 | 0 | 0 |
| dd0edf5dded651f34e13215f1bd7ff67 | 0 | 0 | 0 | 0 |
| 9c54015761a1645d0de120daebfc25c2 | 0 | 0 | 0 | 0 |
| e9d5bb1b8fb7258d2767772cdaee504a | 0 | 0 | 0 | 0 |
| 91611282ebae45eda76fc8423b6c3ac0 | 0 | 0 | 0 | 0 |
| 5ea14b21edea3b487bc77a7b76bdd838 | 0 | 0 | 0 | 0 |
| 3640d0216c99a6f49313b479e91211d7 | 0 | 0 | 0 | 0 |
| 0902220d7c1e6bb1a264ef5c85288a59 | 0 | 0 | 0 | 0 |
| b851543d187f4506b502b72dc80798fe | 0 | 0 | 0 | 0 |
| cf3d36730d14bdd4b59b96db2bdb3b00 | 0 | 0 | 0 | 0 |
| 4961550b1eca2a7bb4497953e9e134c2 | 0 | 0 | 0 | 0 |
| 7fb258318e4424fd43c25578a10328f0 | 0 | 0 | 0 | 0 |
| 462f6509fa5fdbdb2f1b1e9610d3bb0  | 0 | 0 | 0 | 0 |
| 082b66fd264c6158c6d396139ebe6323 | 0 | 0 | 0 | 0 |
| 7d6c2e4cddfe7630b73482bcee68a140 | 0 | 0 | 0 | 0 |
| 33eaebf81ed1fc10e1a22c0fb0f3d659 | 0 | 0 | 0 | 0 |
| 7860974b92a744c8d5fcd7afbcb2f6c6 | 0 | 0 | 0 | 0 |
| ca2113a37998bad02e9d24cf0e5a1a18 | 0 | 0 | 0 | 0 |
| 4707d6fd38b8435e71481946bf3e895a | 0 | 0 | 0 | 0 |
| 16bee213ae88d7ce6725783037a24f11 | 0 | 0 | 0 | 0 |
| 6cbc368b1a10cb974382d82ebf2b4006 | 0 | 0 | 0 | 0 |
| 0a009448c6ddb1e886258bc3d61fe58e | 0 | 0 | 0 | 0 |
| 152712d9504c970b062fc74436b68c3e | 0 | 0 | 0 | 0 |
| e991b4b1498e5243e67de1eeba67a846 | 0 | 0 | 0 | 0 |
| 8bb82132c2ad7802b09d9475d4a54e28 | 0 | 0 | 0 | 0 |
| 51ff45bb32f8c15c67d92d12b27379ab | 0 | 0 | 0 | 0 |
| 310e94ef8c3c0a9b811e6f7816f4e267 | 0 | 0 | 0 | 0 |
| ea0f24f56cb20bd711ff7831f84ed80d | 0 | 0 | 0 | 0 |
| 5ddb0863edcd9dacd60c2e41b63b218  | 0 | 0 | 0 | 0 |
| 4379f6a0a81cbd3eed17408a9fe26993 | 0 | 0 | 0 | 0 |
| 564bd4eb39ebc0bd20ef38435c5258a0 | 0 | 0 | 0 | 0 |
| c4fb07864180fcc65485ea099b5907ab | 0 | 0 | 0 | 0 |
| ae435b8d37b67d461c7c88759e8f4431 | 0 | 0 | 0 | 0 |

|                                  |   |   |   |   |
|----------------------------------|---|---|---|---|
| 9c447ecd6b1cbbb55eb9cb7e6127a414 | 0 | 0 | 0 | 0 |
| 2ad387b4d071c8831dc131eedb947e60 | 0 | 0 | 0 | 0 |
| 22deb4f0c04acd0b7f3d1e375e9a217d | 0 | 0 | 0 | 0 |
| e73d703c66c3dababfb793c7274cf2d3 | 0 | 0 | 0 | 0 |
| a3237e636cdace3353c5fbf54ce93772 | 0 | 0 | 0 | 0 |
| a81cec0bf488fd903b017d9c9d5960f8 | 0 | 0 | 0 | 0 |
| 685624b6d57b337032ac3e79b84e14f3 | 0 | 0 | 0 | 0 |
| ffa3a1e9177c4cdec63fbb6deaa6083d | 0 | 0 | 0 | 0 |
| ff9b5e216d6d9d04ff967d1384dbdfca | 0 | 0 | 0 | 0 |
| 9aafde67405af8ba02fd3da4f057379e | 0 | 0 | 0 | 0 |
| aaf78f572d250edb2e785ebe24841dfd | 0 | 0 | 0 | 0 |
| 632df44b7ea0a6213178304c7626b960 | 0 | 0 | 0 | 0 |
| e117121cee851c68265e3f4005242a30 | 0 | 0 | 0 | 0 |
| c734a97b15cc9561490819017c5eba18 | 0 | 0 | 0 | 0 |
| e45b4cc3599afc5ea3bc679facaac4b  | 0 | 0 | 0 | 0 |
| 66a95d060016bccfabff7a967954d063 | 0 | 0 | 0 | 0 |
| 352abc0a4b0a74e244a928724f5a5a33 | 0 | 0 | 0 | 0 |
| 6f103b051f9e58c6e193d87adaf45a52 | 0 | 0 | 0 | 0 |
| c65a6b0bd2f74628fa4f112460df8e6b | 0 | 0 | 0 | 0 |
| 6c12e1a129f827c1e75847acb5d07f5c | 0 | 0 | 0 | 0 |
| 407f76794762b8856b88c30dd7946f17 | 0 | 0 | 0 | 0 |
| df8d5a5f5e1ac91ecb8793fda3616409 | 0 | 0 | 0 | 0 |
| abe6e0d7c4cdc147413510647d3a35b4 | 0 | 0 | 0 | 0 |
| c66f5e3ae3677ba18791a6502f8ef904 | 0 | 0 | 0 | 0 |
| aa072997909977dae56b766028a3694d | 0 | 0 | 0 | 0 |
| 85291a9fcba1a8127fdd89a5376f2a6d | 0 | 0 | 0 | 0 |
| 70c229be48cda1a50176cb2ff7c3b700 | 0 | 0 | 0 | 0 |
| 76de333c0955b39cb1d71bf4a74ea0d8 | 0 | 0 | 0 | 0 |
| b8fd079009a632725f76f1daf681946c | 0 | 0 | 0 | 0 |
| 37ce080f02780f9bc35700947c6e02ac | 0 | 0 | 0 | 0 |
| 9778ed59e825ae16d14acf991602be20 | 0 | 0 | 0 | 0 |
| 47ae9d1d3ced92fa2864d9a180667eac | 0 | 0 | 0 | 0 |
| b90d4bf21ea15c01522de23ed8516454 | 0 | 0 | 0 | 0 |
| 74b8fe9bdb3204e4de3b7c579894a3d9 | 0 | 0 | 0 | 0 |
| 78a3cc4734f11f767ba747775888db87 | 0 | 0 | 0 | 0 |
| ecc28bd08c3684202c8d4a8b558c1e34 | 0 | 0 | 0 | 0 |
| b4ea24aed193af721936a5be11103220 | 0 | 0 | 0 | 0 |
| 52c46c0dff394d713a5beea9022c6a46 | 0 | 0 | 0 | 0 |
| 92aad2f2583a9c3b2726d42e8245904e | 0 | 0 | 0 | 0 |
| 543ae257521854ac300db81921cbc741 | 0 | 0 | 0 | 0 |
| 197a60881633f335fc02cb98bc8456bf | 0 | 0 | 0 | 0 |
| b82b39994cb0ea23cfae0ae0daf2406a | 0 | 0 | 0 | 0 |
| 38a513753974c67ab7de8b66ebffa797 | 0 | 0 | 0 | 0 |
| a7ded4605c7aa5065343ee0cff7f5919 | 0 | 0 | 0 | 0 |

|                                   |   |   |   |   |
|-----------------------------------|---|---|---|---|
| cb42d1500b41ed27ba7a94247241112d  | 0 | 0 | 0 | 0 |
| 74c1ec6cebc170aea70f5853561adea9  | 0 | 0 | 0 | 0 |
| c9e966abcd9398d34e5b5fb9b318055b  | 0 | 0 | 0 | 0 |
| 8340c116fe649c3805907cfd1fd5abd5  | 0 | 0 | 0 | 0 |
| 7e45fc54c9f3ac58d9e764a03718ad5a  | 0 | 0 | 0 | 0 |
| ec002662bb6a9d7b7f26cce154d8c45c  | 0 | 0 | 0 | 0 |
| 192284ff384e029237d475d536b4aa44  | 0 | 0 | 0 | 0 |
| 2698fdff4211e59835c0cce36ac8ca2e  | 0 | 0 | 0 | 0 |
| 69eaf85d02d5bdc675d8e5416177308e  | 0 | 0 | 0 | 0 |
| bbbbddfbfa79d6e4d2f9f8edf6b88ff18 | 0 | 0 | 0 | 0 |
| 64a1df053699cf650b08da4c653e5d2e  | 0 | 0 | 0 | 0 |
| 0848d0633b12ce8671543dcb0605a677  | 0 | 0 | 0 | 0 |
| 7a888193e883e655f1cf2b0f40e4bb4e  | 0 | 0 | 0 | 0 |
| 691443fdf624cfcf7815b283961c388b  | 0 | 0 | 0 | 0 |
| d2ac051e65e142711f8e36864a096dae  | 0 | 0 | 0 | 0 |
| 09731153a2d8e70561d8cb83ab7d2d58  | 0 | 0 | 0 | 0 |
| 8a2f3e2ad31ea24d4e7c4f9f3cec0cc3  | 0 | 0 | 0 | 0 |
| 9c84a25d3583d8a46afe580190e07c69  | 0 | 0 | 0 | 0 |
| b8e06eba1a46eaf737f980d4d9c2a4a9  | 0 | 0 | 0 | 0 |
| 3d9ccdf46921aeb374c24ab410c99f8c  | 0 | 0 | 0 | 0 |
| 6d0206302214684bcfad7e625525e02b  | 0 | 0 | 0 | 0 |
| 21b2a4c5d1e6de7bce7bf9473a8fa75c  | 0 | 0 | 0 | 0 |
| a1d88aea6d64899efa015e979fc03ecc  | 0 | 0 | 0 | 0 |
| 56be20375d3a77ba09378064e502bf15  | 0 | 0 | 0 | 0 |
| 8c99ce37f60497b066ea9c8ebb3b6b17  | 0 | 0 | 0 | 0 |
| 681100c724f453ab340824ce6952fe65  | 0 | 0 | 0 | 0 |
| 57553b6bf335b618b84788688585db88  | 0 | 0 | 0 | 0 |
| 5518d64b29173db7590a96564bb2d843  | 0 | 0 | 0 | 0 |
| 40c065cd0838d2b6f6c72e19d075fad7  | 0 | 0 | 0 | 0 |
| 97381d6a35300bc5fa59b60252bec509  | 0 | 0 | 0 | 0 |
| ab96ada5de773dc985bc29f6271a1900  | 0 | 0 | 0 | 0 |
| e7266f5af965bfbfa0fcbdaa50befa4c  | 0 | 0 | 0 | 0 |
| dd68944309a3a7347f9bf6767fa2eb3a  | 0 | 0 | 0 | 0 |
| e207a2574eb59c5e7e9f424bba27d814  | 0 | 0 | 0 | 0 |
| 7b90ec2bd3450604551149177a15b97c  | 0 | 0 | 0 | 0 |
| 1da8f64abd8a68be69cd66b522566df8  | 0 | 0 | 0 | 0 |
| 777f5475213ea94d28443e0ea28cd97d  | 0 | 0 | 0 | 0 |
| b577af2bfaedf2972c0e46e5ca2bd405  | 0 | 0 | 0 | 0 |
| 2179004c58c5e010ca039e6e78359abf  | 0 | 0 | 0 | 0 |
| 12aa012d2568cec63aa684727c3c9d8c  | 0 | 0 | 0 | 0 |
| 7ddd8e53de797d774681fb9f5272b16b  | 0 | 0 | 0 | 0 |
| 1288be97e0ca32393b44c6012fbf8ce8  | 0 | 0 | 0 | 0 |
| fbf69e14c353a98d65bb58f339b09126  | 0 | 0 | 0 | 0 |
| 6b0eb9be537c1186d6fa63b49763a7af  | 0 | 0 | 0 | 0 |



|                                  |   |   |   |   |
|----------------------------------|---|---|---|---|
| 978d637595f775c1c20272dc111ae152 | 0 | 0 | 0 | 0 |
| 553f062beb270fd2ad8ceb25fb6721a2 | 0 | 0 | 0 | 0 |
| 5d4ed2c601baee85257025971736d993 | 0 | 0 | 0 | 0 |
| 32e8cf90d2c40ce6a1f6c3ab277ef383 | 0 | 0 | 0 | 0 |
| b8c2a37e71542e33515985f7e23976a6 | 0 | 0 | 0 | 0 |
| 4f6cfda5f3030058d9e4e4be38dc69c1 | 0 | 0 | 0 | 0 |
| 426b4bc435f6dbce8892b6659165ce21 | 0 | 0 | 0 | 0 |
| bd0fc38943edd995b1a94f829e1b482d | 0 | 0 | 0 | 0 |
| 44e13ced64754431eed76d1fd3b51cc  | 0 | 0 | 0 | 0 |
| c5fe37eacca55f9190cd37173295911a | 0 | 0 | 0 | 0 |
| 730d8371e931d5e27ea446dd7b1de02c | 0 | 0 | 0 | 0 |
| 39729385ce78661a1cf3a43bb6b3c6c1 | 0 | 0 | 0 | 0 |
| d9e521ed5e80a8b0a911d399e5dc305f | 0 | 0 | 0 | 0 |
| 2e47ccbe56529b1554310ced93101bb9 | 0 | 0 | 0 | 0 |
| be322610619d38435eb9fb55662fec80 | 0 | 0 | 0 | 0 |
| be09df367763c25ed2208024831b98c0 | 0 | 0 | 0 | 0 |
| 514e7bc5f1b811a1ea6a2b4c7c7ad2a7 | 0 | 0 | 0 | 0 |
| 1c6b62d1fe6be2ad05f589082591afef | 0 | 0 | 0 | 0 |
| 2d32ff4b92efec27f4d5ace0aefb32f4 | 0 | 0 | 0 | 0 |
| 7315e85aba5c16848d39027c92f3ad72 | 0 | 0 | 0 | 0 |
| 10784a482e765435ac8b6f32cdd5b491 | 0 | 0 | 0 | 0 |
| d2952e0d30e6084c5c8fa0b1a989df80 | 0 | 0 | 0 | 0 |
| f23751e71da2ddc2dab660d45639c2bc | 0 | 0 | 0 | 0 |
| 6611ad0b738d723111c60594d6440e89 | 0 | 0 | 0 | 0 |
| 29b8216a978bc5bda8dbec244ce59fd7 | 0 | 0 | 0 | 0 |
| cc90d4c9110b59ed918c7a37b33be4c7 | 0 | 0 | 0 | 0 |
| a9835d007d92794804d86e8e887f5287 | 0 | 0 | 0 | 0 |
| 59a200bab5b3cab2ef369c05de08fa5e | 0 | 0 | 0 | 0 |
| 014749173e00b78d06c5cc5d0937dbf4 | 0 | 0 | 0 | 0 |
| 162bf0414716e451cc58a9c528df4687 | 0 | 0 | 0 | 0 |
| 7f63864062c572eebd921fa4565b066e | 0 | 0 | 0 | 0 |
| dae48f39236eeca94aba960dccf94001 | 0 | 0 | 0 | 0 |
| aa5482d931834d65608f2da6876ee4ee | 0 | 0 | 0 | 0 |
| ed1ebdaad277cb0d1f9cc5245875a659 | 0 | 0 | 0 | 0 |
| 84d2fffc872b1cf838433f66e9b15e58 | 0 | 0 | 0 | 0 |
| 98c15ed4d879e5344f73e8ae9d968080 | 0 | 0 | 0 | 0 |
| 449559e1fd9968779de5f59728d12341 | 0 | 0 | 0 | 0 |
| be5aafc21f7c85f217ff5344d627ac21 | 0 | 0 | 0 | 0 |
| 19ca1b159e1365b28b50f5fcbadb917  | 0 | 0 | 0 | 0 |
| 2bce58f5a9e84dd2415d7b488664fd8a | 0 | 0 | 0 | 0 |
| 203e314660203807bb643db6bcc7ebc2 | 0 | 0 | 0 | 0 |
| da7bb3e147bd8a74438d553766f0acea | 0 | 0 | 0 | 0 |
| b3cdeca5b0c8ab2c87a68beb525c4f4f | 0 | 0 | 0 | 0 |
| 27b0ee50babf2fb653bf2ddfc4e0070d | 0 | 0 | 0 | 0 |

|                                  |   |   |   |   |
|----------------------------------|---|---|---|---|
| a01d2125ae1bb9a237740f7347a0165b | 0 | 0 | 0 | 0 |
| 3b853492ca90f9ed54403eef17b9d3bf | 0 | 0 | 0 | 0 |
| 43605bd5cac55d846c0c993d9e8767b8 | 0 | 0 | 0 | 0 |
| 6cf9892ccd74a2d351805d9445a066f3 | 0 | 0 | 0 | 0 |
| a84165a61ec6315e0197d1cda30b16d0 | 0 | 0 | 0 | 0 |
| cf94963331bdb07c9feb5fb8561281ab | 0 | 0 | 0 | 0 |
| 784ba0617adae6a55d7e6f4a6c5b12ba | 0 | 0 | 0 | 0 |
| ada462dedf73a40663456b81f135d352 | 0 | 0 | 0 | 0 |
| b37d97f9808b0aa91f09c1f9c50658b8 | 0 | 0 | 0 | 0 |
| 8d482b5f5f8ac8990e1518c70ced512a | 0 | 0 | 0 | 0 |
| 3d507786b617598e0e91036376f133cd | 0 | 0 | 0 | 0 |
| 9291354e7ff536b9a96b3459c3042db7 | 0 | 0 | 0 | 0 |
| 980fd60be0b5a97c0de63bb83c154fcb | 0 | 0 | 0 | 0 |
| 29288b6aaa8906f11d4655b638a9c073 | 0 | 0 | 0 | 0 |
| ac1d58b4ffe2e1e092812364f18df587 | 0 | 0 | 0 | 0 |
| 80da8bc13afeb16f24430562ec2dbe19 | 0 | 0 | 0 | 0 |
| 68aa997911f76c26ffac5309bd4b15e1 | 0 | 0 | 0 | 0 |
| 37786ce5ae6577196514797cd1512a52 | 0 | 0 | 0 | 0 |
| 816636304a83b2779ec1197ef7e108e8 | 0 | 0 | 0 | 0 |
| c30f29a5ab8b2abc2449494d5cdebe7f | 0 | 0 | 0 | 0 |
| ebff391f13817cd104c20e1df3241553 | 0 | 0 | 0 | 0 |
| f346d8138e3f51b4ca2ecfdc7638be4e | 0 | 0 | 0 | 0 |
| a6c8ab642426856be4dab76a6d48599f | 0 | 0 | 0 | 0 |
| 0e2490619d424da9e80109cca24eddda | 0 | 0 | 0 | 0 |
| 69a24357c93492e349a84e94083e32d6 | 0 | 0 | 0 | 0 |
| 739d11f58e0d0f559ba94667309fae01 | 0 | 0 | 0 | 0 |
| fd1f654922f3440d537b0e44387a5257 | 0 | 0 | 0 | 0 |
| 8d8f0c88856355ca4c232df8c515827c | 0 | 0 | 0 | 0 |
| 84ff63ac11b906749cdd811286167de5 | 0 | 0 | 0 | 0 |
| f1cc2b848fcfaeabebbb7c2ba2fc6844 | 0 | 0 | 0 | 0 |
| bd30bde45a8dc81fb506b21ac85d450e | 0 | 0 | 0 | 0 |
| d6aa6c75ba1837a1cbff8ad663b4d606 | 0 | 0 | 0 | 0 |
| d68d62cca6334badb7e79f673a05e5f1 | 0 | 0 | 0 | 0 |
| c9de38f50da8944dd8879e8bd0557046 | 0 | 0 | 0 | 0 |
| 57d6e0d1dcb490f30914023adbefbb5  | 0 | 0 | 0 | 0 |
| c2d51ce1b9cf40245a09c3b6c45f8b52 | 0 | 0 | 0 | 0 |
| af5fab893201e0339eb4e7966e8a54f4 | 0 | 0 | 0 | 0 |
| 232038706ebd617316b3aec70083ce6  | 0 | 0 | 0 | 0 |
| d4e224f7fa01f0581e402c47b02bf09e | 0 | 0 | 0 | 0 |
| 0a7d55e1fc6c00ad74e7e58496003831 | 0 | 0 | 0 | 0 |
| a51aa932258efc3dc7a923747eb56110 | 0 | 0 | 0 | 0 |
| dbcfc208eabfbe712b4a8f3734351d0c | 0 | 0 | 0 | 0 |
| 4cb1fb23cece734cf4f4c927b63dc146 | 0 | 0 | 0 | 0 |
| 3e5f4ac64e53efd4b4c9435ae70da7ae | 0 | 0 | 0 | 0 |

|                                   |   |   |   |   |
|-----------------------------------|---|---|---|---|
| fc10a09fc0771edc12d6ceb619e61eca  | 0 | 0 | 0 | 0 |
| bd080386e6de4e40c8b217ce84f3fdad  | 0 | 0 | 0 | 0 |
| e7bd477fefcc50ca2cb48d8037c51c92  | 0 | 0 | 0 | 0 |
| 473b54b78773debb9e86def551b98c5f  | 0 | 0 | 0 | 0 |
| 3bb4a160f56b4734ab2e130b87126f77  | 0 | 0 | 0 | 0 |
| 887e48142ab4946761066de4cfa19fe6  | 0 | 0 | 0 | 0 |
| 2329f985e620c1a5905a4d0901bb0171  | 0 | 0 | 0 | 0 |
| 9a95529fa03667846c95940ae4c957c4  | 0 | 0 | 0 | 0 |
| 98f7d657f0581393e8fb5e7612a39095  | 0 | 0 | 0 | 0 |
| 35259fcb2e60ac5a4bfb97fc22df6b0d  | 0 | 0 | 0 | 0 |
| ad5f02ef478837fd31411032eb6ffb1d  | 0 | 0 | 0 | 0 |
| 814b6b61864dabe64f47a7d4250071e4  | 0 | 0 | 0 | 0 |
| 8f31bf6388745d073246b5e095dd9e95  | 0 | 0 | 0 | 0 |
| 23f1b831441c33b845736fdb5606508   | 0 | 0 | 0 | 0 |
| 428a966a0e96dc295fae574639796a29  | 0 | 0 | 0 | 0 |
| 6d8959c0f86974fc9873bf2fd195c95e  | 0 | 0 | 0 | 0 |
| 751c0512b16d73d690aa342b76ab23e2  | 0 | 0 | 0 | 0 |
| a7c47d31c564d2b7b4e4e4d333790696  | 0 | 0 | 0 | 0 |
| 816aa376573094e9f56d864aaf6d79ca  | 0 | 0 | 0 | 0 |
| e2710cc6671678da454a7b2a5bd8f8ce  | 0 | 0 | 0 | 0 |
| bc2d714936122963cd9ee8597cf351fe  | 0 | 0 | 0 | 0 |
| 6e48c628b8b4d7c452042f7095cae022  | 0 | 0 | 0 | 0 |
| 48d022f5f28a8b58b9cc7bb60a4a73a6  | 0 | 0 | 0 | 0 |
| d8baa566717041b096df019b2ff93d5a  | 0 | 0 | 0 | 0 |
| f4fd5588b417ecb000620c4956615a2b  | 0 | 0 | 0 | 0 |
| 38465f3f12a8ea89a09dcc18df3ab39f  | 0 | 0 | 0 | 0 |
| c8d850cd748774ee97aca7d789df36ce  | 0 | 0 | 0 | 0 |
| ce5f359c007e7a385d69d49dd4184db6  | 0 | 0 | 0 | 0 |
| 54d80a49d5b6f34bd4f3202d2cd5f7cc  | 0 | 0 | 0 | 0 |
| 9cc7c790b0119047e5ec36a244456483  | 0 | 0 | 0 | 0 |
| 36b069d16465ec3a5956446e84341c0a  | 0 | 0 | 0 | 0 |
| 49d0d7528f8636e22a2466a4cc7a3765  | 0 | 0 | 0 | 0 |
| 4f5fb19695cc2dbb53d04bbd61296503  | 0 | 0 | 0 | 0 |
| 5eca99c7fa0029eefb5988f1c34d4881  | 0 | 0 | 0 | 0 |
| 8debb58ced0f1692d5dd1ee0e66df921  | 0 | 0 | 0 | 0 |
| 5b3acd698237f7e6b15e9568cb97d5ba  | 0 | 0 | 0 | 0 |
| 8fbbdb436f5869bdc426ec3b666533047 | 0 | 0 | 0 | 0 |
| 8ef6943e7f6b3a7b0987b9ea931a4ab7  | 0 | 0 | 0 | 0 |
| 2572210289e2397d117e5b5b98c37db0  | 0 | 0 | 0 | 0 |
| ad145f34c9f4b67f7d1aae28b8e3ea0a  | 0 | 0 | 0 | 0 |
| a0eae9d84e63c7adc2aabf863459044   | 0 | 0 | 0 | 0 |
| 36f5e6d783f5993647b5aa897b302b27  | 0 | 0 | 0 | 0 |
| c62eeb8d14f2ef5de54f03fceedcf2ac  | 0 | 0 | 0 | 0 |
| d89ec412a2a9f039fe12dfc5837229ed  | 0 | 0 | 0 | 0 |

|                                  |   |   |   |   |
|----------------------------------|---|---|---|---|
| 86f1dd3a6548188f1e489587e5478885 | 0 | 0 | 0 | 0 |
| 7d52b4863d80f7b4882c9fee1d9d768a | 0 | 0 | 0 | 0 |
| d9f50bad018a0061d85c7552b116793e | 0 | 0 | 0 | 0 |
| 19e41506998b6fc8a591bcfebc9c1a6a | 0 | 0 | 0 | 0 |
| 2c6eb32179d7845b74a178797f8fecaa | 0 | 0 | 0 | 0 |
| c3713f49543680dca3348ae0361e29ac | 0 | 0 | 0 | 0 |
| 0428f37739627f9ee0855d45afa275cd | 0 | 0 | 0 | 0 |
| 92706cf855d340ff831435d958a242e0 | 0 | 0 | 0 | 0 |
| 3e3827d425ad77d4063ef0eb9fc67d87 | 0 | 0 | 0 | 0 |
| 7b2d9aec7ab701964e07c2eaff41c80e | 0 | 0 | 0 | 0 |
| dbfa53800533e0edac2207ef7f67449e | 0 | 0 | 0 | 0 |
| ceee97b19a0737983a6eb95931450569 | 0 | 0 | 0 | 0 |
| 8e70577bc3b2e7e2c552402df154dd44 | 0 | 0 | 0 | 0 |
| c75990d7677720892b562ad89319f228 | 0 | 0 | 0 | 0 |
| 5c618d490e7f9e53971ad614eed0b10d | 0 | 0 | 0 | 0 |
| 84a6452d8b70c6c7f9690e2995bde3cf | 0 | 0 | 0 | 0 |
| ea1d2a680108877cd7837c87a8d70172 | 0 | 0 | 0 | 0 |
| 0cc9007e3d4a3ae4fe1c030e83293259 | 0 | 0 | 0 | 0 |
| 906985f86891311683812e6c0e6698ca | 0 | 0 | 0 | 0 |
| e666e836f21234012b540e11b7a8aa55 | 0 | 0 | 0 | 0 |
| 9ed2f76cd997d86ed0cf87153d0bdce1 | 0 | 0 | 0 | 0 |
| cc78a36223d572473af9c21c05a0da9e | 0 | 0 | 0 | 0 |
| 31598a9449225c7bd8248dca0d6f11fa | 0 | 0 | 0 | 0 |
| d4d8a09eb12452c378515a99e0bcc417 | 0 | 0 | 0 | 0 |
| d73eb66596e32004a750b433f4091377 | 0 | 0 | 0 | 0 |
| 37d1a0808eff2a7feb50695011094fa7 | 0 | 0 | 0 | 0 |
| d52d4ced214e1df6b3517a6c90ab3b73 | 0 | 0 | 0 | 0 |
| 38ae344dcb815d18030f56f8a3c8bf7b | 0 | 0 | 0 | 0 |
| f51bd3061e0e490ce33d1a7e5fa53277 | 0 | 0 | 0 | 0 |
| 5226258030e114a667e1a50bde3c0d4c | 0 | 0 | 0 | 0 |
| bfa76448abe99d894c82931fb6270c71 | 0 | 0 | 0 | 0 |
| 6c56ce09f7bec7ed40f35ff06701dbac | 0 | 0 | 0 | 0 |
| 07f03b80f8e176acfc9d6933cb9eaac1 | 0 | 0 | 0 | 0 |
| 86e1ffc2cc86aa83fffb3372b5d15145 | 0 | 0 | 0 | 0 |
| 0a3f1d712fcf57da961c19904aaf78c8 | 0 | 0 | 0 | 0 |
| 980ecfa490ce882ddf72fd8f5118470c | 0 | 0 | 0 | 0 |
| b912b89106fc91933444ddee8d100501 | 0 | 0 | 0 | 0 |
| 6496492cd30f345b239d3d4fa25fda2a | 0 | 0 | 0 | 0 |
| 8f00040b094d1705b0ac9ce91f06e3ae | 0 | 0 | 0 | 0 |
| b79785ede246795323268f61442a584f | 0 | 0 | 0 | 0 |
| 5cd86cd55b1bac2687c7e4977fe8d7ef | 0 | 0 | 0 | 0 |
| 9ed5770d9e6e8007a399c5093abff106 | 0 | 0 | 0 | 0 |
| 2f48370c6b07ddb90379b53d95b24082 | 0 | 0 | 0 | 0 |
| ba3b6ad3b6be79507789bccd5cd7833d | 0 | 0 | 0 | 0 |

|                                   |   |   |   |   |
|-----------------------------------|---|---|---|---|
| b7f250d315174dbb882126ea3a93ee06  | 0 | 0 | 0 | 0 |
| 5b226bf936b59bfdc1305bf40adb9f5   | 0 | 0 | 0 | 0 |
| 9638682b7218abc3be71baf3c163cec8  | 0 | 0 | 0 | 0 |
| eee56cc890ad93d42bae0cfd18164f11  | 0 | 0 | 0 | 0 |
| 3cbc1ea4b1289e79344c47ea971852d7  | 0 | 0 | 0 | 0 |
| e88931ed0db745117e2832933973dfc8  | 0 | 0 | 0 | 0 |
| 0a020b6f9492d17217e0e7a58510a2be  | 0 | 0 | 0 | 0 |
| e3e82c404c9472a8fa409a8eb731086a  | 0 | 0 | 0 | 0 |
| 1581c8c80a8fa3ea693cf35d1a393644  | 0 | 0 | 0 | 0 |
| 3876207928742711d18645217094065b  | 0 | 0 | 0 | 0 |
| 887f2fec87d17799794ca58ba366061a  | 0 | 0 | 0 | 0 |
| 4f96bd8f27b909f8a3f369dec7726c44  | 0 | 0 | 0 | 0 |
| b0d62a4b5f4c2ba9846966c4e06a297d  | 0 | 0 | 0 | 0 |
| 6d69862961940e24d41867a3da1dea0a  | 0 | 0 | 0 | 0 |
| f6fee5e404f33d70e57a13c14003ff50  | 0 | 0 | 0 | 0 |
| b9b09d586fa696b47ab19ca8df19bef9  | 0 | 0 | 0 | 0 |
| 01f2df74d85f212cf98aa28df61414fe  | 0 | 0 | 0 | 0 |
| d86805f77b6e648c8213a3db132fbf52  | 0 | 0 | 0 | 0 |
| 2bd0159d7b42580c96c9569713d32868  | 0 | 0 | 0 | 0 |
| b3e1021bc6913d35f1bbfc0abdf362f1  | 0 | 0 | 0 | 0 |
| f24227662de83285e6079383fa63b508  | 0 | 0 | 0 | 0 |
| d84c57856214178ff4d1ce0da7047bf3  | 0 | 0 | 0 | 0 |
| 1e05dbd4fc170d8011ebf37a1b8994d4  | 0 | 0 | 0 | 0 |
| 53a181e5b2cb91262c98d82c0eeb5838  | 0 | 0 | 0 | 0 |
| 44329b2289211d0aac0e6ecf7976a5ba  | 0 | 0 | 0 | 0 |
| d45eef2b8071276aa6d359852cc3fc26  | 0 | 0 | 0 | 0 |
| 363304bd5171afdb0d0fccf96a075781  | 0 | 0 | 0 | 0 |
| 3322d6cc4bfd2b355271e179e49a20f7  | 0 | 0 | 0 | 0 |
| fc14792965150b198dedf21dee372745  | 0 | 0 | 0 | 0 |
| 6dfbe74587875d61089755b32fd246f3  | 0 | 0 | 0 | 0 |
| 232d3be2afbaf1fb75e4f3177ee1ec76e | 0 | 0 | 0 | 0 |
| 680f421ef4e924bffaf48aa802e5b6ea  | 0 | 0 | 0 | 0 |
| ad9e044952bd7f9a366b677d55f2ac1f  | 0 | 0 | 0 | 0 |
| c2fdd98495f188db176b8229ee092245  | 0 | 0 | 0 | 0 |
| 91655e24ee163b7b146293c6aaef0cf4  | 0 | 0 | 0 | 0 |
| a91f00f7fd2df7a74daf70efede398f4  | 0 | 0 | 0 | 0 |
| 39c450641f6e2a7eb42d143375a9718d  | 0 | 0 | 0 | 0 |
| 06fc1887e03d0a03930140a6105d5bbd  | 0 | 0 | 0 | 0 |
| be41f7e354f12ab1008c747e5b3ea6d3  | 0 | 0 | 0 | 0 |
| c5ccc97fc381475d13d3fc43f7498b19  | 0 | 0 | 0 | 0 |
| c58a0b021dfd39ac570977640db3cf38  | 0 | 0 | 0 | 0 |
| 746d3bb3ac4efc382ad2c06362378b15  | 0 | 0 | 0 | 0 |
| c2e4d097be635bbc4c67cc82e972b7f9  | 0 | 0 | 0 | 0 |
| 7943ed86739d048767fdbd6c606a4ba5  | 0 | 0 | 0 | 0 |

|                                  |   |   |   |   |
|----------------------------------|---|---|---|---|
| 5316324f07723c7d811e6ec07d0b0cec | 0 | 0 | 0 | 0 |
| 3548768e95580646c9fb1f5dab0d3935 | 0 | 0 | 0 | 0 |
| fe1e93f7d80df526dbc1c9fd7cd1eb6d | 0 | 0 | 0 | 0 |
| e24f6032c62c9566fa3f0a0399faff94 | 0 | 0 | 0 | 0 |
| 507803e61560dce1d349dbc0df149247 | 0 | 0 | 0 | 0 |
| f68686f803b9b9a3f862d731086411e2 | 0 | 0 | 0 | 0 |
| 3d00332448606d0869ec3fce95238f0c | 0 | 0 | 0 | 0 |
| 6760b61a0fd93b5184737446589a4a7d | 0 | 0 | 0 | 0 |
| 3e70fe258120812a8f006bb00277ca3a | 0 | 0 | 0 | 0 |
| 1d34e24a67829b90b8a11c02b96aae4c | 0 | 0 | 0 | 0 |
| 0939d43f3a310f0c378eabde4bf73c45 | 0 | 0 | 0 | 0 |
| d5321609d55063ecda9fdc6aead45cb0 | 0 | 0 | 0 | 0 |
| c4f89ba0cd25e055bf9ab56d5f2b9705 | 0 | 0 | 0 | 0 |
| 5e90bde6b8cb33d2dc0556971512e299 | 0 | 0 | 0 | 0 |
| 63a5cf81ec3a66b20122abfb6ddc4ef4 | 0 | 0 | 0 | 0 |
| 70660d50a2e0491be59b2d2eb63a3132 | 0 | 0 | 0 | 0 |
| 95b0185014d83c6e562b0c4a99ceb3a2 | 0 | 0 | 0 | 0 |
| e08307e4d5f45985f92d0f3d53580b31 | 0 | 0 | 0 | 0 |
| c2a873471c42d4bf2351c2a9d569a0ef | 0 | 0 | 0 | 0 |
| f6fcf1ffa90cc2b4078c0038cfd07f84 | 0 | 0 | 0 | 0 |
| 5a4c46cf076f94de6481c00049aded6d | 0 | 0 | 0 | 0 |
| 871c28943cb69a4ad7d88f6596cd7e1b | 0 | 0 | 0 | 0 |
| d821d95b17e7509f7146940d6f846019 | 0 | 0 | 0 | 0 |
| 1f0010bdc1044a7606ef2259884a96c7 | 0 | 0 | 0 | 0 |
| 2d00a20b708e7a5d279d209de9bfcc8f | 0 | 0 | 0 | 0 |
| 240f27dd474e1304f851443bbf8300e2 | 0 | 0 | 0 | 0 |
| b780738bce3d7d2b39fbd62e7252c259 | 0 | 0 | 0 | 0 |
| 84272203d43ece4aa400dc92bd0fa602 | 0 | 0 | 0 | 0 |
| 6b4e1521105e00c6670d6a838acee09f | 0 | 0 | 0 | 0 |
| 2a6a9a42126002604c38998e187a2d04 | 0 | 0 | 0 | 0 |
| 1eb6d9e848d016d8cf9eedf25ecb2235 | 0 | 0 | 0 | 0 |
| d3973beb17ac7c16d96b8a030d015a4a | 0 | 0 | 0 | 0 |
| e67de061f9c88490333e71a7969c24fd | 0 | 0 | 0 | 0 |
| 6d476b957401ccb980c74f9537a307a9 | 0 | 0 | 0 | 0 |
| 261439701806994b1ae802f586e33ab8 | 0 | 0 | 0 | 0 |
| 8974b043a5cd96dbf450d1f2941d79b5 | 0 | 0 | 0 | 0 |
| 252e6735f3c1d819bc866b0f5ef9ec23 | 0 | 0 | 0 | 0 |
| 64c926a9037f09796ae4f6dd4c1d14ca | 0 | 0 | 0 | 0 |
| c5fb3f289fff7c061d1ca20d33116913 | 0 | 0 | 0 | 0 |
| 96467f6bfe894e4cfa6ec4f168ce5b93 | 0 | 0 | 0 | 0 |
| 6e4a4baa17514c27fb623cf48a54483c | 0 | 0 | 0 | 0 |
| 3931441300e51cfa9b1b355697e97ea0 | 0 | 0 | 0 | 0 |
| a8f02c962a5c5c008084a254e0a5faa9 | 0 | 0 | 0 | 0 |
| 2c458143a5c2b9ab1ada978b35bfa239 | 0 | 0 | 0 | 0 |

|                                  |   |   |   |   |
|----------------------------------|---|---|---|---|
| 0a9359bb851902f0a839ffc8be24e982 | 0 | 0 | 0 | 0 |
| f1be469ede9deab6e0efe6e47bdb2796 | 0 | 0 | 0 | 0 |
| a42ae0de83487b807195d0117b472d45 | 0 | 0 | 0 | 0 |
| f826c7b484079893b904a56ddc6cc670 | 0 | 0 | 0 | 0 |
| 5c208ae58ae167ffd4147c7cf2e67739 | 0 | 0 | 0 | 0 |
| 3e8c79fc6c76502a3ad2d2bfb71de978 | 0 | 0 | 0 | 0 |
| 6a9f480ae4e1aba51e4903e22352e63c | 0 | 0 | 0 | 0 |
| aae9bf9f1b0938f9b5ef6cd56f1c80df | 0 | 0 | 0 | 0 |
| b649847ff451fb1987942556133a29eb | 0 | 0 | 0 | 0 |
| 81d4e3205035050379e15044bd4991ad | 0 | 0 | 0 | 0 |
| 8f78489ac88f6e26afd07492109ee65a | 0 | 0 | 0 | 0 |
| 9d85b0be1e4086c2d24a9db51635a411 | 0 | 0 | 0 | 0 |
| a54e9543b0567b2d1c6d78ebee2d68e1 | 0 | 0 | 0 | 0 |
| a205b835a852768ad6bf0f119aa1635f | 0 | 0 | 0 | 0 |
| db5b1f5338e1e4b4b6c61d4306e9ebdc | 0 | 0 | 0 | 0 |
| 6b5f69cef4000adaf5623aea3cdbe72b | 0 | 0 | 0 | 0 |
| b031614da4667bf2d904f15671b2be06 | 0 | 0 | 0 | 0 |
| 5fef4e635c092a5e96980a2524c29ad2 | 0 | 0 | 0 | 0 |
| 652b8cabaa379ba837497558dae6c864 | 0 | 0 | 0 | 0 |
| f413bf21407e4dcc3fba42a42e3151c6 | 0 | 0 | 0 | 0 |
| ce03a61b9917e972102bf29303ed1e3b | 0 | 0 | 0 | 0 |
| 5b03b20b8d4d2dlace31158820d31c91 | 0 | 0 | 0 | 0 |
| a1488aa2681387cab2a7c4effa471bda | 0 | 0 | 0 | 0 |
| 50eb129479ee9f601973365168551445 | 0 | 0 | 0 | 0 |
| 398e810c57d03a13d97176cae70e5c79 | 0 | 0 | 0 | 0 |
| 263f87588f7f4e8cd9c3240416a16b84 | 0 | 0 | 0 | 0 |
| febce931d69776997ec318476d536485 | 0 | 0 | 0 | 0 |
| a7290bf4777e2cdf150cce4921321064 | 0 | 0 | 0 | 0 |
| 8c64feffb2640cd47c1c40af274193f  | 0 | 0 | 0 | 0 |
| 04b697c9e2728ef8f2af16add0e07950 | 0 | 0 | 0 | 0 |
| 342c5ee7f1333981f2cf7c874f36c21c | 0 | 0 | 0 | 0 |
| 51ebad6c3aa99f3a026cd191f3659474 | 0 | 0 | 0 | 0 |
| 8c428ce15f5bf971dabffb5319c00a1e | 0 | 0 | 0 | 0 |
| 1f87b3cc8a1796b3726270810fef3b4d | 0 | 0 | 0 | 0 |
| c63236319ad30a5b1f4a53fd53645bb5 | 0 | 0 | 0 | 0 |
| e662638f4d30b14a9ba156e21fca2ac1 | 0 | 0 | 0 | 0 |
| a2f9cf8995cac401b6565a9a26619ecb | 0 | 0 | 0 | 0 |
| cb71d12b49d78b6717d3ec7c1c79897d | 0 | 0 | 0 | 0 |
| fe5b5ead9ea5386f891b043190cb12a1 | 0 | 0 | 0 | 0 |
| 1d19e702036f09f2e84d0385aa3efb9e | 0 | 0 | 0 | 0 |
| 71282a8d411817d3f03979a0dee724c8 | 0 | 0 | 0 | 0 |
| 6b2a708033e9c6f039d62a9bea45eda6 | 0 | 0 | 0 | 0 |
| f7b1604f9eeb3593c55ce67c4a10427f | 0 | 0 | 0 | 0 |
| 24986115cbda57f4e4d1929d576e8dc9 | 0 | 0 | 0 | 0 |

|                                  |   |   |   |   |
|----------------------------------|---|---|---|---|
| 3401cc4ce2731dad6e553129c8b54a4a | 0 | 0 | 0 | 0 |
| ebcf1ed4936e7199e989837bfc6f8a93 | 0 | 2 | 0 | 0 |
| 60346898ed1630717245b9a000f62fa2 | 0 | 2 | 0 | 0 |
| 9b4c1509ebe65487dcb616165230ab35 | 0 | 2 | 0 | 0 |
| 233c9d48a750c812b6cf831de50e4e7f | 0 | 2 | 0 | 0 |
| 3a5cbf678072de241f06a332f9c3aa04 | 0 | 2 | 0 | 0 |
| bad43a65c7d559ba5ba5454624e5f6f2 | 0 | 2 | 0 | 0 |
| 3fde7000784cdb9f21ec1963dcc2172a | 0 | 2 | 0 | 0 |
| 7c3716f0913c9d86ae6add0c3c641415 | 0 | 2 | 0 | 0 |
| 0b7208eaccb8387ce9bcb82119619c63 | 0 | 2 | 0 | 0 |
| f617c60ed852d727053dddcd99d5153a | 0 | 2 | 0 | 0 |
| 61a590d8df4937aa52bb5c02095b1734 | 0 | 2 | 0 | 0 |
| c9938c70861e3f5654180ba05d4bbe0a | 0 | 2 | 0 | 0 |
| bdc91c5cf11f02d770edf03583b980b4 | 0 | 2 | 0 | 0 |
| 634ca70923f646e8b40e49d030f86a17 | 0 | 2 | 0 | 0 |
| e914c7b59b4de0defcd1fedc4452ff28 | 0 | 2 | 0 | 0 |
| 8773e4543182ee7bfe325197e5c9b5e2 | 0 | 2 | 0 | 0 |
| 14e59b076081814fa054c7ab76d03f01 | 0 | 2 | 0 | 0 |
| d1f22b8249a19a74bb6e5a14bcd291ba | 0 | 2 | 0 | 0 |
| 4828561a5ce2bd7f999b162a4c4c8380 | 0 | 2 | 0 | 0 |
| 4bf87fae2e680d5daeacdb25219cfc2c | 0 | 2 | 0 | 0 |
| e72a6674e3e07f7dc35d9da3fd1b64b6 | 0 | 2 | 0 | 0 |
| ddffcf60e2bdac5a89f2299b75eec342 | 0 | 2 | 0 | 0 |
| 8017816d8e9ed00c61a655c88b49ac1a | 0 | 2 | 0 | 0 |
| dbdbb7815f690456b8d34cc215634ac9 | 0 | 2 | 0 | 0 |
| 630d3753e0025ccca16d829422432c8b | 0 | 2 | 0 | 0 |
| 582c7909ecf80e1d649c6948e7ec96ca | 0 | 2 | 0 | 0 |
| 0e67d50046df5e54f9cfe0a56aa14575 | 0 | 2 | 0 | 0 |
| e32fffc27538aaec6666b1dd5cad0ef3 | 0 | 2 | 0 | 0 |
| 92166dc802befae1e47d7458909db323 | 0 | 2 | 0 | 0 |
| 8c3b51e40840f89ee098064e0f3be960 | 0 | 2 | 0 | 0 |
| c05222b48c58be4bbb2d976468a8f722 | 0 | 2 | 0 | 0 |
| 5c2d69148ab75c4fb2d91fa96390013d | 0 | 2 | 0 | 0 |
| bf2a88aeaa44e3ec75c21c40b21e5c22 | 0 | 2 | 0 | 0 |
| 7c194030162c8c32e1661ad42e876eb4 | 0 | 2 | 0 | 0 |
| a8ba00fc55afea8272824e4d1586d35d | 0 | 2 | 0 | 0 |
| e9836f001f5ebbcf5f43ed0e53c2ed6a | 0 | 2 | 0 | 0 |
| 9d311dce322c407ad4940d112bc41717 | 0 | 2 | 0 | 0 |
| 45a00e4e71dbe2d590aaff943560e481 | 0 | 2 | 0 | 0 |
| cd7ba0d62bc8f74fcbc154b2f8e7de2f | 0 | 2 | 0 | 0 |
| 82718eabd90ecdd4ea0701ba1c6e2406 | 0 | 2 | 0 | 0 |
| 80dba18994321bfaa5b89abbc1a40413 | 0 | 2 | 0 | 0 |
| 7d52aec6868c73eb8425a5177b91ee54 | 0 | 2 | 0 | 0 |
| 123e3b7cac7fbb8acd8e2ce33cb1cb1c | 0 | 2 | 0 | 0 |



|                                   |   |   |   |   |
|-----------------------------------|---|---|---|---|
| b9014da0ac4d37007aa2b50be445fff7  | 0 | 2 | 0 | 0 |
| 822214a3f70b1875ea51d4c4f02265bc  | 0 | 2 | 0 | 0 |
| 5178ebce63a07d4d9f3b35d83e45d8f1  | 0 | 2 | 0 | 0 |
| 21d3657144614ee0fdaf6c4c56d38965  | 0 | 2 | 0 | 0 |
| 607fcc1d9e426ffc93551482840686f7  | 0 | 2 | 0 | 0 |
| 7223b4b894536e2ae63e4becb8b2288c  | 0 | 2 | 0 | 0 |
| adae88e94d5ef7dd88fa4a3b4693cc97  | 0 | 2 | 0 | 0 |
| d40157b565eee0b042aee57f212356d9  | 0 | 2 | 0 | 0 |
| 590e9ba1dbff4d3ecc2f60cb6f1a308f  | 0 | 2 | 0 | 0 |
| 512400fc1b937af94886a070310cf23f  | 0 | 2 | 0 | 0 |
| b2f5b3a5c9d2f880919ae8244933af7c  | 0 | 2 | 0 | 0 |
| 23d1b55cd1f85108df6d7e76e5d21c41  | 0 | 2 | 0 | 0 |
| db257452905821730bb2386350f214d2  | 0 | 2 | 0 | 0 |
| 18e63108093dfc208935c7adfe54d940  | 0 | 2 | 0 | 0 |
| e1d991a75bb1f1dd2b4c1ada788e99ba  | 0 | 2 | 0 | 0 |
| 37e5a11221a474aceb13eeddf5a23e64  | 0 | 2 | 0 | 0 |
| ab2355514ce466c97215b2421c3672c7  | 0 | 2 | 0 | 0 |
| 647896df314a9b4da7413a29e4d297cb  | 0 | 2 | 0 | 0 |
| 7d1224e38c48c5cf801fce0e5d0bcb69  | 0 | 2 | 0 | 0 |
| b1f50a56bd5bb007e0f9908960012a8b  | 0 | 2 | 0 | 0 |
| db571096a046f7d6fc04cb253e0b3977  | 0 | 2 | 0 | 0 |
| 007ca487ba0eb9cdb275b9698ac67c74  | 0 | 2 | 0 | 0 |
| 0d907f1a792f49df2c6dab8432f6f423  | 0 | 2 | 0 | 0 |
| 5e186ff28d573d79b5e56c342f86fd0f  | 0 | 2 | 0 | 0 |
| b73a911bc0e52cb1682716507cb56122  | 0 | 2 | 0 | 0 |
| 4396ae54f3c1a3667b2ac1ab70ea13f4  | 0 | 2 | 0 | 0 |
| 6ed8d17fd18b76c91df0a25002c9f714  | 0 | 2 | 0 | 0 |
| 7a5a3490ec46921c3ea437758885da24  | 0 | 2 | 0 | 0 |
| c5971c2a53d094320e396013c2f7baf4  | 0 | 2 | 0 | 0 |
| 7969cd3fbf907cef70737cf31e5269a6  | 0 | 2 | 0 | 0 |
| 34b73de46720a2003ac7c4a72bfe8c40  | 0 | 2 | 0 | 0 |
| 5342d44be1bb1635d5be4bd04556dd07  | 0 | 2 | 0 | 0 |
| f60a81dba47e39ef2fdaa64b790f46a6  | 0 | 2 | 0 | 0 |
| a7ac0636501b386af38d8fbc456ae35   | 0 | 2 | 0 | 0 |
| f857d4f8f33219ba441055b82456e914  | 0 | 2 | 0 | 0 |
| 0419e989ef756bc1706ff32cb41620f2  | 0 | 2 | 0 | 0 |
| 983ec8c44f5f7c671a14bad2dcd90dd3  | 0 | 2 | 0 | 0 |
| 08ea0ec3a421053e25e11a0a994b3482  | 0 | 2 | 0 | 0 |
| cfcd22cd180a3ace67436b45dcaf639f8 | 0 | 2 | 0 | 0 |
| 761dbd5a579e6df9b0109abce65185df  | 0 | 2 | 0 | 0 |
| adfd14ff1a62bf5eb6cfabd62caea085  | 0 | 2 | 0 | 0 |
| e137d04074ce974f89aac396f9425261  | 0 | 2 | 0 | 0 |
| b09d40759097bc5a68376be942cb686e  | 0 | 2 | 0 | 0 |
| 72d5affa1c5ad8680081d5ef637d2d97  | 0 | 2 | 0 | 0 |

|                                  |   |   |   |   |
|----------------------------------|---|---|---|---|
| 0c8134a7f14ef47f329e706bfc58b17f | 0 | 2 | 0 | 0 |
| c23213605d99a9fe342fcd2d600395c8 | 0 | 2 | 0 | 0 |
| 9de18939f27021de6b21920b19906167 | 0 | 2 | 0 | 0 |
| 4181e55523531b9cb48e1c973ed20f8c | 0 | 2 | 0 | 0 |
| b29a561d830f51a325efd218a9e9dcb4 | 0 | 2 | 0 | 0 |
| a38a9d12825679d0cee91b1f545a41a0 | 0 | 2 | 0 | 0 |
| 2427eb346cd7148cfa4e7e9991b06e8d | 0 | 2 | 0 | 0 |
| af881045558037f1c595c7c043b71d11 | 0 | 2 | 0 | 0 |
| 54eee499ff13f5bd95534a20c028a47d | 0 | 2 | 0 | 0 |
| 2e72c246486344d40383ec0ddb7ba0a4 | 0 | 2 | 0 | 0 |
| 7372240a7bde6c6c37770a8620266da0 | 0 | 2 | 0 | 0 |
| 1a71add7269610dac7517209e7076a88 | 0 | 2 | 0 | 0 |
| 91a8047844bddad9e38b1e322df4a320 | 0 | 2 | 0 | 0 |
| 76b2f3388e70ee5b7e391218277dc9e0 | 0 | 2 | 0 | 0 |
| e28d3ba9424c46986ba09eccf28e9115 | 0 | 2 | 0 | 0 |
| 5f7dfbe128b0089d5141e2b18d5d6733 | 0 | 2 | 0 | 0 |
| b1035de9c546b2e5a37464203fac194e | 0 | 2 | 0 | 0 |
| 73def851c1fa8b525bbeb904fd657894 | 0 | 2 | 0 | 0 |
| 78c33d9fcb1355d332ccf5f6aa97a318 | 0 | 2 | 0 | 0 |
| f70632301cb134598b4fb5d31267b112 | 0 | 2 | 0 | 0 |
| 195e833ced045ca619b2503c123ce518 | 0 | 2 | 0 | 0 |
| f67a3506cdc54d3eefc8937d175faa88 | 0 | 2 | 0 | 0 |
| 18327b5d5e0010f007b10a1f10c13ada | 0 | 2 | 0 | 0 |
| f32308cd3cca17f917b006460dffbae9 | 0 | 2 | 0 | 0 |
| f8d9a051f4fa8466d7e8ec54860df911 | 0 | 2 | 0 | 0 |
| f1fbba31759e5efcc7c591a4be4c9b65 | 0 | 2 | 0 | 0 |
| 7a271cd8a56180edf7e5c6078e5c0bce | 0 | 2 | 0 | 0 |
| 474f62b404e976b323f10e2eb98e2e20 | 0 | 2 | 0 | 0 |
| 9bdc8c3731acdcfa73626f74785f69c4 | 0 | 2 | 0 | 0 |
| d1edbdea752fb6ea86b3e32656e03e8f | 0 | 2 | 0 | 0 |
| 4a063d485d04d9ca2143e3d05155dee3 | 0 | 2 | 0 | 0 |
| 1986abd26e6f803c5b5d50bf34803aba | 0 | 2 | 0 | 0 |
| 91a5c4e84917945ee4be83d1d277b447 | 0 | 2 | 0 | 0 |
| 38592042aa0adfce80dae085282aa925 | 0 | 2 | 0 | 0 |
| ec6c582a183c761e85ff095a3a624f93 | 0 | 2 | 0 | 0 |
| 4ceac901f26c9f83c991ad1fe0eae03b | 0 | 2 | 0 | 0 |
| 22951c6f54a3d1b3a59fe0c99f71b11b | 0 | 2 | 0 | 0 |
| be731ea0fd88d63a5fd581fc3e3e6e79 | 0 | 2 | 0 | 0 |
| 1a29e273b9366594fcfae9d2430f105b | 0 | 2 | 0 | 0 |
| ba3c005f78d8d9ec882889d4d9e77189 | 0 | 2 | 0 | 0 |
| 4472317798902e5504ed38cc03052496 | 0 | 2 | 0 | 0 |
| 3c7a853d9bd3dd6a730664933ce32293 | 0 | 2 | 0 | 0 |
| d1f06cd449e2616dc803419299f98022 | 0 | 2 | 0 | 0 |
| 6269e053a8c64c573d9db6e14a01f56a | 0 | 2 | 0 | 0 |

|                                  |   |   |   |   |
|----------------------------------|---|---|---|---|
| 7759eedc8ffd803c877ea1b3ecba9ef4 | 0 | 2 | 0 | 0 |
| 77c91f3c617c407b438932a5520bfce2 | 0 | 2 | 0 | 0 |
| 5cbf6e580b207ca04cb1e0466cbcca21 | 0 | 2 | 0 | 0 |
| b446a6f630b8fd6f2f6ce8c039b3b0a0 | 0 | 2 | 0 | 0 |
| c1066b6081bdcdbccb69eaf4ad421217 | 0 | 2 | 0 | 0 |
| ecf5b5c8daaf5c95ee16a7f8773cc8c3 | 0 | 2 | 0 | 0 |
| 3a13f6fbf866a5bfba934557ceeaba99 | 0 | 2 | 0 | 0 |
| 1324b1c454968183ce33b5c0860f6f85 | 0 | 2 | 0 | 0 |
| caa06b8d280a6256e966b7ef08c4e957 | 0 | 2 | 0 | 0 |
| e5628d4a4a8b1f5e130d64d62624c564 | 0 | 2 | 0 | 0 |
| b476a6fe2cee4b8ac7f2ae2a17f3d44a | 0 | 2 | 0 | 0 |
| ea30f8de05c1e27ee3b908dbcfe7db98 | 0 | 2 | 0 | 0 |
| 806b02202670628e85005d1f8062ddad | 0 | 2 | 0 | 0 |
| 7b8c7367ce1046b85302290ad434d59c | 0 | 2 | 0 | 0 |
| ca15ce43792085e733fd90fc8cb5c90b | 0 | 2 | 0 | 0 |
| 7861850a65a801754a5ff94e0ec59618 | 0 | 2 | 0 | 0 |
| d97f1a0ab4edf202d1883eede3c277a0 | 0 | 2 | 0 | 0 |
| 6bce86b65498e09d1dac5b2c9a66a8f3 | 0 | 2 | 0 | 0 |
| f0e06ee48380a6620a938629c6524c42 | 0 | 2 | 0 | 0 |
| 3696add3a48dc0b18a88079cd4a85e60 | 0 | 2 | 0 | 0 |
| 4ada91a57d606e38a2ed5009a29abd82 | 0 | 2 | 0 | 0 |
| 1a80f6e7e4ec587a03ded04552bd3fe6 | 0 | 2 | 0 | 0 |
| 6c335e53737898ffe05864d80a3c1535 | 0 | 2 | 0 | 0 |
| 437d1262b29b07777b55fb9b0398e7a2 | 0 | 2 | 0 | 0 |
| 2deeb93f06a001b83b55f577520e967d | 0 | 2 | 0 | 0 |
| c297981e5bb7fe720d4b44fc27b09671 | 0 | 2 | 0 | 0 |
| 564242e3fecddb907658fa1bee09e09f | 0 | 2 | 0 | 0 |
| e4f02f1e776847b9937975cba194eae4 | 0 | 2 | 0 | 0 |
| add96da95e233879db152d4b04f12dbb | 0 | 2 | 0 | 0 |
| e7c8ad0037676b34e737ab289936b029 | 0 | 2 | 0 | 0 |
| 88a895611330599c28606665bc16ed03 | 0 | 2 | 0 | 0 |
| f29f8a0042bad4e13e32acef8d8fb4b9 | 0 | 2 | 0 | 0 |
| b75ec28b612c76cc269bcb9791141e53 | 0 | 2 | 0 | 0 |
| d617d0cc880a83500b762b792effe432 | 0 | 2 | 0 | 0 |
| 4e256aba37c944f2e3c7f8c53301da49 | 0 | 2 | 0 | 0 |
| 8fc1d06451626abaf24dc1852a679402 | 0 | 2 | 0 | 0 |
| 376be488e728bf95ee3549c43f69518c | 0 | 2 | 0 | 0 |
| a3794e2a5f8dbd95c44f90c65fb2c1a0 | 0 | 2 | 0 | 0 |
| 27330376d142368736d2ecf06da28841 | 0 | 2 | 0 | 0 |
| f80097f2888d05fc711bc8a41f3c772c | 0 | 2 | 0 | 0 |
| df3b4299a8db98f325333f54d6b2f1fb | 0 | 2 | 0 | 0 |
| 6f47368a98463442dd0414bb4a220178 | 0 | 2 | 0 | 0 |
| 41fef3e18414a05fbe5a6c7ea2ae3e09 | 0 | 2 | 0 | 0 |
| f69066035580ac2d34b030952bc96f44 | 0 | 2 | 0 | 0 |

|                                  |   |   |   |   |
|----------------------------------|---|---|---|---|
| e80c8c29c2b102d4397a91aeb2457414 | 0 | 2 | 0 | 0 |
| d7287d40ef43b6162282042e8ff72cb2 | 0 | 2 | 0 | 0 |
| a039e17d2a9167e9eb3b157b80e84a31 | 0 | 2 | 0 | 0 |
| dbfc5488e912fa9f513b500df344718f | 0 | 2 | 0 | 0 |
| 22ec5f4271e9a637927984f9752ead54 | 0 | 2 | 0 | 0 |
| cbd115ac668dfddaeb35a0b5747c1d05 | 0 | 2 | 0 | 0 |
| a16be7541cee31aeb8ec676fc85ba6df | 0 | 2 | 0 | 0 |
| adefdfa2bd3c98515576c9049ad9fe57 | 0 | 2 | 0 | 0 |
| 74645c45257d83a4d994d8c1b1c35ec0 | 0 | 2 | 0 | 0 |
| f0dbe3e281077704ef9e6d5a9f1b1af3 | 0 | 2 | 0 | 0 |
| 7ca09c0f65b14572e0c36d0d10d1071c | 0 | 2 | 0 | 0 |
| a933396f519df0d25153258df4b8ae75 | 0 | 2 | 0 | 0 |
| c469971abfeaf9155e35d35803bee5b3 | 0 | 2 | 0 | 0 |
| befd477e0f9b86d6cc732f37c7b73b71 | 0 | 2 | 0 | 0 |
| 703558db4eca517217947996f9eac56b | 0 | 2 | 0 | 0 |
| fb756f2b1ae054ad3f196e6986a644ef | 0 | 2 | 0 | 0 |
| b031729fab172b649b848c93a8ef9169 | 0 | 2 | 0 | 0 |
| 53d07eb325d9fec4b9b46708c24fe18c | 0 | 2 | 0 | 0 |
| 954204f7e4836521923d35d7afcf5552 | 0 | 2 | 0 | 0 |
| 26bce684d86cbbac602f43e7298d2eb9 | 0 | 2 | 0 | 0 |
| e53c1da47080b9a4b2392159a23c56aa | 0 | 2 | 0 | 0 |
| bd578061130c0df65a240dbabc08eeaa | 0 | 2 | 0 | 0 |
| 6ac752833b462a689fff0f96117763ea | 0 | 2 | 0 | 0 |
| 28ea8105af6fe6f3a89556464cea76dc | 0 | 2 | 0 | 0 |
| 4c3d63270cd02b599a1a01164c29e3bf | 0 | 2 | 0 | 0 |
| 0e2af8f589a4f25aeda5ca61a4b16880 | 0 | 2 | 0 | 0 |
| d157d74d1d18ff61df1d1ac8d7b3fc9c | 0 | 2 | 0 | 0 |
| c494a5303b40d95a9a71f7caecd5d87c | 0 | 2 | 0 | 0 |
| 33ca2a224e102a3d5fdf3e9666fce9b9 | 0 | 2 | 0 | 0 |
| dcdfc586657fa80bc1b22a4bf64697e6 | 0 | 2 | 0 | 0 |
| cdbe2d866916be61a616c16f46f9fe19 | 0 | 2 | 0 | 0 |
| 52343bdfcd060cbce72ceb305b775902 | 0 | 2 | 0 | 0 |
| 140e424cd87cf80f8764fad630317893 | 0 | 2 | 0 | 0 |
| e38c97f25e25c15f6869b3fb1fb99d14 | 0 | 2 | 0 | 0 |
| 56a977965537d8aad4128ea64ee5914a | 0 | 2 | 0 | 0 |
| 5f85ba761bdc078591ae9a5f852cc9ab | 0 | 2 | 0 | 0 |
| 11d19e3ea6bd0bc0f6dc7321afbd45fe | 0 | 2 | 0 | 0 |
| 8e09524905fc1e03a1819416b49b4d26 | 0 | 2 | 0 | 0 |
| 8eecf05121eedf64b2167d503a3e057d | 0 | 2 | 0 | 0 |
| ab1585f98992d15b5801d93e9b5ba42e | 0 | 2 | 0 | 0 |
| 5a317bed9c95dbb74b9ca50451734adc | 0 | 2 | 0 | 0 |
| 585423f5400dda1bd4c31fb6974610af | 0 | 2 | 0 | 0 |
| fdaaf400eaa156d8168f76df73f7cfa3 | 0 | 2 | 0 | 0 |
| ead2f4a740da7a9eb9bf3eaae9dfde66 | 0 | 2 | 0 | 0 |

|                                   |   |   |   |   |
|-----------------------------------|---|---|---|---|
| 08411ee17709547641698bde56cc5932  | 0 | 2 | 0 | 0 |
| c8c8b55a806f6efec563625195d83fd3  | 0 | 2 | 0 | 0 |
| 4e116efe290a12aeebf0d54d7692bff5  | 0 | 2 | 0 | 0 |
| b00aa52cec21c1b45e0edd8144336f3d  | 0 | 2 | 0 | 0 |
| 2377d4d8bb855f7b46887f5a6dedd431  | 0 | 2 | 0 | 0 |
| 5da36925eb173a628bd42e4cb20ef98f  | 0 | 2 | 0 | 0 |
| 7b63fc6feced52ca8d8c628b51207fa1  | 0 | 2 | 0 | 0 |
| 624cf662e0deea5d6ddaf66980d3e3f1  | 0 | 2 | 0 | 0 |
| 73576ea59d88dc4a31f279e5111eda51  | 0 | 2 | 0 | 0 |
| 553469801e96190a09ea4fa26a4ac48c  | 0 | 2 | 0 | 0 |
| b8e79df2adcd9e78282a73bdc4f3a862  | 0 | 2 | 0 | 0 |
| 7ae2fa70edf9f8ae230c141852998df7  | 0 | 2 | 0 | 0 |
| efd9730322eee7b7b96b575d2038ca7d  | 0 | 2 | 0 | 0 |
| 523fff71810808b4fe658c3b840b485c  | 0 | 2 | 0 | 0 |
| f3f60d7f2bfcabc0e5399d5a01f6f94ab | 0 | 2 | 0 | 0 |
| cd9d24746717db650663ad6fa5325fce  | 0 | 2 | 0 | 0 |
| 8f6f466d35cb154b97849e2cbdce7ba3  | 0 | 2 | 0 | 0 |
| 0cdd727208a9fbc70ce41cb05165f042  | 0 | 2 | 0 | 0 |
| d9964d98bb92e65063f68cf675828cb3  | 0 | 2 | 0 | 0 |
| 2ac18dd1b7c10b6503a9ed237078ca53  | 0 | 2 | 0 | 0 |
| 9445caf3cbc88283f2bdaebe9395d74a  | 0 | 2 | 0 | 0 |
| 3bb9e6b1e611363c4894defc5262ea15  | 0 | 2 | 0 | 0 |
| 346647131d4c7b0b9ffb3c744b4f54a1  | 0 | 2 | 0 | 0 |
| 1c2a04146c63d62edc64cf611bed341b  | 0 | 2 | 0 | 0 |
| 3393e7b78b939ac630b93301c17d4d16  | 0 | 2 | 0 | 0 |
| 5fa5e29f7a211b534327eb6f701b6fab  | 0 | 2 | 0 | 0 |
| 76ec880e5fa0e406c6f2c5ec77ffcb70  | 0 | 2 | 0 | 0 |
| d86ddd2522be9c5f66590823c048be29  | 0 | 2 | 0 | 0 |
| 4da63126ad085e81415965f80a294023  | 0 | 2 | 0 | 0 |
| 69fa680104f5bf5fa61e416e20346d36  | 0 | 2 | 0 | 0 |
| 4997fb3bc27dd0539a8da3127fe63305  | 0 | 2 | 0 | 0 |
| 8013cf0b64783bbb0a6dbed0e758637d  | 0 | 2 | 0 | 0 |
| 526f58dd26c9731320af087f73ead442  | 0 | 2 | 0 | 0 |
| dcde629dc181617fa414b37923097dcd  | 0 | 2 | 0 | 0 |
| 0fd8d2276c4e9aac781572aaf47802ad  | 0 | 2 | 0 | 0 |
| dac38472911d92a7811152304f5df6aa  | 0 | 2 | 0 | 0 |
| 68aec73e1d3b894fed0aa610570049a7  | 0 | 2 | 0 | 0 |
| 2c8a1cb5bcf8d8b41008331ce1bcb0ee  | 0 | 2 | 0 | 0 |
| cf57c72e7f7dda077ac5eff3b6561cf5  | 0 | 2 | 0 | 0 |
| 91816d0b89ac69192490a59eb26da284  | 0 | 2 | 0 | 0 |
| d43bdb98417cb03d4400a42efc39052e  | 0 | 2 | 0 | 0 |
| ceae37e8e965a00573ef274344c23e79  | 0 | 2 | 0 | 0 |
| 64732b73b4e8d26ebb6839ced0d86f71  | 0 | 2 | 0 | 0 |
| a0fa59a84711e91b782e744c2595224d  | 0 | 2 | 0 | 0 |

|                                   |   |   |   |   |
|-----------------------------------|---|---|---|---|
| e2de494ef7ae409dce8ae848407a7d99  | 0 | 2 | 0 | 0 |
| 6647f366d845cc09deb7eaa84e5e0be7  | 0 | 2 | 0 | 0 |
| 083f9ecbe1150b88a1f378ff3a0d67b0  | 0 | 2 | 0 | 0 |
| 4b1efa7f54b3b5d682c024cad3727472  | 0 | 2 | 0 | 0 |
| a6e66edf74458d19195cc6031f85ae15  | 0 | 2 | 0 | 0 |
| c6d12771b003f538daad9bc5c957ffc8  | 0 | 2 | 0 | 0 |
| bda28e42894d8f832b23743ceb828678  | 0 | 2 | 0 | 0 |
| c13c481eca089ad6ad28dd8ab831a5e0  | 0 | 2 | 0 | 0 |
| aeb4ea11c8f4167da3e578c5f175d581  | 0 | 2 | 0 | 0 |
| 224875ca15a733b9c263637abfcebl1da | 0 | 2 | 0 | 0 |
| e7925f38000d25c04ec9f02554761097  | 0 | 2 | 0 | 0 |
| a3afe99670c4c4eebfab05cb9aab31d0  | 0 | 2 | 0 | 0 |
| 822baccee98928b13a38dd93d8405d80  | 0 | 2 | 0 | 0 |
| f06030c4fd9207a316eed034387d38f1  | 0 | 2 | 0 | 0 |
| 5c4c3d773f3a86c1b7924f206674b1b6  | 0 | 2 | 0 | 0 |
| 63b51add68745cb03eec0abde753f7d7  | 0 | 2 | 0 | 0 |
| eadaf230197f2935ad1aee431738e5f3  | 0 | 2 | 0 | 0 |
| 90bcd2b2fecb9ad437a5ea30a804a094  | 0 | 2 | 0 | 0 |
| 30758295d4dfe5db9d84e19a6850f06b  | 0 | 2 | 0 | 0 |
| ed1a63f68ea4ba523f6795c5691d90ed  | 0 | 2 | 0 | 0 |
| 6d51aa940ea554824cf441962c0270a0  | 0 | 2 | 0 | 0 |
| b77f769e71af54b62058997544c0f497  | 0 | 2 | 0 | 0 |
| c2a8d7bab56be1fe2a84de4f70f27021  | 0 | 2 | 0 | 0 |
| f7879aa35a056b8963d2a10b59746849  | 0 | 2 | 0 | 0 |
| 67f75dbbc0e3ab56c565ab46c972b6bf  | 0 | 2 | 0 | 0 |
| 0571e2fa76b319d9d74dfffcee6446c5  | 0 | 2 | 0 | 0 |
| a44e0f7e875f566138a5fbe0371209e9  | 0 | 2 | 0 | 0 |
| 7509cf6625843e3fd33587b3319fcf0c  | 0 | 2 | 0 | 0 |
| fb46c1bf452d69b39bc61dc92e051d62  | 0 | 2 | 0 | 0 |
| 82a3bcfe57b08e37221092b6562c2a8b  | 0 | 2 | 0 | 0 |
| c419ee65d72896e498c233bda115bec0  | 0 | 2 | 0 | 0 |
| e2001ddcdac68c6c3b9f19d45a878d93  | 0 | 2 | 0 | 0 |
| bc426a863378e2cbd1f6c851ba2c2835  | 0 | 2 | 0 | 0 |
| 423989d8d5cdb1e49b5a891efe2dec20  | 0 | 2 | 0 | 0 |
| 75853f7ec7da788d646f2aed38bb62c5  | 0 | 2 | 0 | 0 |
| 469a041eb109ca38d141ea0dbb63f47a  | 0 | 2 | 0 | 0 |
| 53c20b44437fbc94c5e2fbef122c923f  | 0 | 2 | 0 | 0 |
| 4005cc18f68808bd7435fa2bb71510c8  | 0 | 2 | 0 | 0 |
| d2b3f7a7842df325eb9c80bcea240910  | 0 | 2 | 0 | 0 |
| 1fb8aac96ee1ae6d951362c4f4d4de3c  | 0 | 2 | 0 | 0 |
| d855b5ba2b6dcd0ed575e438d554c4ba  | 0 | 2 | 0 | 0 |
| 903b7eeab4797b09956850f52c171da9  | 0 | 2 | 0 | 0 |
| 1a96a6ff2f6ebfef93c076f4537aa8d0  | 0 | 2 | 0 | 0 |
| e4c5557713bcb004a2a67cf7c21340dc  | 0 | 2 | 0 | 0 |

|                                   |   |   |   |   |
|-----------------------------------|---|---|---|---|
| de240b04e41e115831c18ee780b1f418  | 0 | 2 | 0 | 0 |
| 9f20ab2eac3ee4f0a31febebaaff6c0ec | 0 | 2 | 0 | 0 |
| d13a9c1e8cae9dfa6f3870d4186ab406  | 0 | 2 | 0 | 0 |
| c780126be8abe5eb5fd4d34e27e690af  | 0 | 2 | 0 | 0 |
| 0fd5c0395dd258af756bbd8fefa557e3  | 0 | 2 | 0 | 0 |
| 8cffc1b33dad35afd1cb1c03d6555edd  | 0 | 2 | 0 | 0 |
| 9f7b0000a765ec26089f4e0fd658cca4  | 0 | 2 | 0 | 0 |
| 0685429ca748026eb21fa8ca5cfcca01  | 0 | 2 | 0 | 0 |
| bb2f4ffc78785613f6d023fd7c462575  | 0 | 2 | 0 | 0 |
| 1e508ba863535140c736871dcd065e7f  | 0 | 2 | 0 | 0 |
| 51333c51aa51089daf72d79eeadfbbe4  | 0 | 2 | 0 | 0 |
| e0f036b78d15e4492fd6967c5201a61d  | 0 | 2 | 0 | 0 |
| 536ae11992daaea5d24fbabcf4ae4a93  | 0 | 2 | 0 | 0 |
| 3cd4608b5c6d92bbd2e8120c2f0983f8  | 0 | 2 | 0 | 0 |
| 25764b3ccca0412350a8e8187e65a085  | 0 | 2 | 0 | 0 |
| 461bffa375b1bd971b3b8168bed171e5  | 0 | 2 | 0 | 0 |
| 3a936bc10e588589e93de9e4d39711ff  | 0 | 2 | 0 | 0 |
| 425c4dece738c95fef406e62133eafb7  | 0 | 2 | 0 | 0 |
| 4025aa877ee797fb5b6ddbe7e1b2d596  | 0 | 2 | 0 | 0 |
| 2e5fff000b4939d3b97904c82c23df14c | 0 | 2 | 0 | 0 |
| 607185f9d3023a739e44b5bcc5b47bbf  | 0 | 2 | 0 | 0 |
| 339e903898755501ce383b7b4810b199  | 0 | 2 | 0 | 0 |
| 05a1ac81d0c6ce4df6d09b21b7faa7f1  | 0 | 2 | 0 | 0 |
| 4a4f0b6b6198f076b7ef4fd3fa1ac1ea  | 0 | 2 | 0 | 0 |
| a72f76c407e1b033bba8d1c7600c2c2d  | 0 | 2 | 0 | 0 |
| 29ee8f219f1a40646a66f6d4976c293d  | 0 | 2 | 0 | 0 |
| f1650c9aa0271faf49aebc3fe4a927dd  | 0 | 2 | 0 | 0 |
| bcce3e08ad867eff9879dc73975f0ab3  | 0 | 2 | 0 | 0 |
| c043e6b72611015ca3806f49bbfe427f  | 0 | 2 | 0 | 0 |
| 44e2b8330802809e280cc656bf9fd28e  | 0 | 2 | 0 | 0 |
| 30276b904c3fa12009ea5e899c1de94b  | 0 | 2 | 0 | 0 |
| 5dd1464383f1a9c5423c8d8bcebcd039  | 0 | 2 | 0 | 0 |
| 5a2e52b225a6d7481d1f436bd20d0993  | 0 | 2 | 0 | 0 |
| 6b7ab3ceed4d75249f5935a2e799c868  | 0 | 2 | 0 | 0 |
| 8272943256a6e169a30385f44600a62a  | 0 | 2 | 0 | 0 |
| b49058ae2d3099135b4aedcee246bb92  | 0 | 2 | 0 | 0 |
| db2384c2e1ba3b30865988f9fb953404  | 0 | 2 | 0 | 0 |
| 2f4ada7dcd450e6006c6ed6fc91f48e   | 0 | 2 | 0 | 0 |
| 8ba3bdea4475655cf765a4bd112c25b7  | 0 | 2 | 0 | 0 |
| 6c6e56af99788321b684a38bd3864b81  | 0 | 2 | 0 | 0 |
| e49a89dab290ff4b14ad7b4262f2f376  | 0 | 2 | 0 | 0 |
| 5c841b59b9a0990e35169549e098974a  | 0 | 0 | 0 | 2 |
| e083850deaff44a6794abf3b70defa4d  | 0 | 0 | 0 | 2 |
| e9b701f61b7096cb0d7bb24cb2ba68e2  | 0 | 0 | 0 | 2 |

|                                   |   |   |   |   |
|-----------------------------------|---|---|---|---|
| 58d919ebfffe89c8f81add3bc90ddc9c1 | 0 | 0 | 0 | 2 |
| 16574e325e1026a2ff4b83ee95e18786  | 0 | 0 | 0 | 2 |
| 1faad29b3066efa8643c4df9d2560e4b  | 0 | 0 | 0 | 2 |
| d3e0ab4e28ea479a1ba96ddd2c540ace  | 0 | 0 | 0 | 2 |
| 10279fb407b6dcd90eee2c4c463ef78a  | 0 | 0 | 0 | 2 |
| e142cc87098ff1554a952c608c4115a5  | 0 | 0 | 0 | 2 |
| c10807c34a28ddb25bb0cb53aeaa4a7d  | 0 | 0 | 0 | 2 |
| 904fc7be24fdc9562537788c50111e77  | 0 | 0 | 0 | 2 |
| 420f84268e45e2d2a41a607b960c8d90  | 0 | 0 | 0 | 2 |
| d567151ca212577e65fb3a322c89cb4e  | 0 | 0 | 0 | 2 |
| d424ab805f12cd873f41f76235e4ecc5  | 0 | 0 | 0 | 2 |
| 2581fe798c6cc3c4cfe3cca65916ba39  | 0 | 0 | 0 | 2 |
| 3f6c29efdd82dd9eaa818c4a89729eb8  | 0 | 0 | 0 | 2 |
| 0c4ddbabb565c9ba84e766721e863d82  | 0 | 0 | 0 | 2 |
| 92bb6c3b780135b2de0841ea9f649d4e  | 0 | 0 | 0 | 2 |
| e55736c9dc6bbda7f8b9d2eafabea1c4  | 0 | 0 | 0 | 2 |
| 2ed5e489d77218359335fdaba8b2b457  | 0 | 0 | 0 | 2 |
| 27395dba20406a78c251ffa98b7c3d54  | 0 | 0 | 0 | 2 |
| 5ed1d72a14d12fafe7f3d43aedd5c5f9  | 0 | 0 | 0 | 2 |
| f9e1369872a076ba5571ad46114a6b60  | 0 | 0 | 0 | 2 |
| b1d928b78404f4cd4756a06e5a2d1eb7  | 0 | 0 | 0 | 2 |
| ded3d6f8da674fbb0cb12aff6abddcd4  | 0 | 0 | 0 | 2 |
| a40e4d79741b47cc95f2ce3d343b3424  | 0 | 0 | 0 | 2 |
| 3518d0e246af32286cd465046d3bef77  | 0 | 0 | 0 | 2 |
| d51020dd3e76bd59039a975a0f76eb3c  | 0 | 0 | 0 | 2 |
| 577e73a53ea4e3090d6d76a7525a1df7  | 0 | 0 | 0 | 2 |
| 95a73dfdc25d129acd71ce87aa5c6339  | 0 | 0 | 0 | 2 |
| 6a29fdfaabfe06a979918055e93787d3  | 0 | 0 | 0 | 2 |
| da0f3e835376eff866c30cfc6f20d008  | 0 | 0 | 0 | 2 |
| 65805a5f884bb230a882c078fc08076f  | 0 | 0 | 0 | 2 |
| f0acd012717d5f14a4ea0d8b422d71ca  | 0 | 0 | 0 | 2 |
| 8aaaf1f85853f9729150cb7185bebfdd  | 0 | 0 | 0 | 2 |
| eea201f51c18776360d94163f0c0aa5c  | 0 | 0 | 0 | 2 |
| 4ed4d3191ec2d148e284a2f9362f5664  | 0 | 0 | 0 | 2 |
| 3110f0b1b86b33ced50dc35c639b92ad  | 0 | 0 | 0 | 2 |
| 2c62aeb55ffb945104c52ca82af1af3d  | 0 | 0 | 0 | 2 |
| fd8c1a1c996958dcd6ae30f4e9bc98e7  | 0 | 0 | 0 | 2 |
| c764f164ea4b61ade3e63ee8e35f505b  | 0 | 0 | 0 | 2 |
| 97bd09354678378d3674db00ea66a8ae  | 0 | 0 | 0 | 2 |
| 2bc024e814727d24208938848c5e8755  | 0 | 0 | 0 | 2 |
| 0c7fe43c9ef66626c5ec806a5f20f243  | 0 | 0 | 0 | 2 |
| 94649db70e94fc2d947328588a9e5fc6  | 0 | 0 | 0 | 2 |
| f70aa09f5a402e38ada739c6a3a86e11  | 0 | 0 | 0 | 2 |
| 9ff5940d35714936c6a884093fb9b165  | 0 | 0 | 0 | 2 |



|                                   |   |   |   |   |
|-----------------------------------|---|---|---|---|
| fa4c3dee6e6ed14327ee583da8cd0e58  | 0 | 0 | 0 | 2 |
| 15401c562c6778039abd9fc2f8340ad0  | 0 | 0 | 0 | 2 |
| da02af43930e519b126e5e32592cfcbb  | 0 | 0 | 0 | 2 |
| 77137b25173008b6ae46886ef832a886  | 0 | 0 | 0 | 2 |
| d401975b23930e70cd5d6247a64f3298  | 0 | 0 | 0 | 2 |
| ef6d7585dbccc47fda79958b594db8c3  | 0 | 0 | 0 | 2 |
| c6003c6333f3960c6f5f1c4986d9f579  | 0 | 0 | 0 | 2 |
| c8749ffae245c85a539aaec0c17b68bb  | 0 | 0 | 0 | 2 |
| ee5d35e3fad7b0539ac791945bb415d2  | 0 | 0 | 0 | 2 |
| 7721f5e5363567ebb55d4714410c0e5b  | 0 | 0 | 0 | 2 |
| 20890591c49a4877f52d45846ebb516d  | 0 | 0 | 0 | 2 |
| c365f295f26af2a78e762346abd44fe8  | 0 | 0 | 0 | 2 |
| 60af038f9e3f07e32f8fe6512b6ccbda  | 0 | 0 | 0 | 2 |
| 3ab8a7a2647411a2a65dc1845c701052  | 0 | 0 | 0 | 2 |
| ef1814c6e3ca617c310827742e313870  | 0 | 0 | 0 | 2 |
| cbe09f993bf22a88b25939c62b634aac  | 0 | 0 | 0 | 2 |
| 13d610a58607f8b8b2fc863302dc0014  | 0 | 0 | 0 | 2 |
| 054d0732c50833339e57b12033b7a919  | 0 | 0 | 0 | 2 |
| e0857a7bed82d08b6c4ac427bfff4c4f4 | 0 | 0 | 0 | 2 |
| 8bd83992819229db1bb891d02f6447d1  | 0 | 0 | 0 | 2 |
| e2dedf582d76d6a5619e08faf3279074  | 0 | 0 | 0 | 2 |
| c62215b6ab0a9d5bcae94b4b00bd5c0d  | 0 | 0 | 0 | 2 |
| 98240028e821e03bccda8847a317dac0  | 0 | 0 | 0 | 2 |
| 5b8fa5a9474cac9877b41f4e6d9225e7  | 0 | 0 | 0 | 2 |
| 3492a7873f64518573e283398b44c8d7  | 0 | 0 | 0 | 2 |
| e3a5704a76d0c67b64777259183ffbb1  | 0 | 0 | 0 | 2 |
| f7b5fff43f599b87c64af744e88436f5  | 0 | 0 | 0 | 2 |
| 2b114db76f4632b4bc210f034ea2d858  | 0 | 0 | 0 | 2 |
| a7bb2dbabcc5292f60350852e6347500  | 0 | 0 | 0 | 2 |
| ede75edbd1f0783ff4ad251cb7ddbcca  | 0 | 0 | 0 | 2 |
| 1d1b3c651b91e5cbc1cf4356f146ba80  | 0 | 0 | 0 | 2 |
| bc99a27a75da75f4ff02cc512e9bc38f  | 0 | 0 | 0 | 2 |
| a7abc0336240f1aec39966f39256d5e9  | 0 | 0 | 0 | 2 |
| 45955fbe5709e2ed8612232ec869b7f6  | 0 | 0 | 0 | 2 |
| e41f9ca2984aa15a9fee6d00f777ae09  | 0 | 0 | 0 | 2 |
| c13c955c7728027944a190ac30008bb7  | 0 | 0 | 0 | 2 |
| fd2bb9bcea7c2a310158fd24d97699ca  | 0 | 0 | 0 | 2 |
| 406fd054989858427395496aff9a35e9  | 0 | 0 | 0 | 2 |
| 91cc03fb364ef25534085c736859f324  | 0 | 0 | 0 | 2 |
| cddcb356b15531f2dd92bc3b5dc2a805  | 0 | 0 | 0 | 2 |
| 9a4e93540168ec8248b27e10a98e02b4  | 0 | 0 | 0 | 2 |
| f560881ac530b6b0c3615cea482b69ad  | 0 | 0 | 0 | 2 |
| 0b122ca140a159f64acf405b6ea38846  | 0 | 0 | 0 | 2 |
| 7d4be31b7d11d84cfeac172adc0ec735  | 0 | 0 | 0 | 2 |

|                                   |   |   |   |   |
|-----------------------------------|---|---|---|---|
| e5deb5a266cb58c7bef8f2bc3f975299  | 0 | 0 | 0 | 2 |
| 23523863e1daa459a2cbb22902249246  | 0 | 0 | 0 | 2 |
| 022a075385c040060e8021468c034f19  | 0 | 0 | 0 | 2 |
| 4245a4589e0a4bf3953e66e75c8ee283  | 0 | 0 | 0 | 2 |
| 0f2fd9a779c28eb93a0b58c5b6f57949  | 0 | 0 | 0 | 2 |
| 8529974f86cc2fca483c03c4ce411eae  | 0 | 0 | 0 | 2 |
| c93f1964f72ea41bc4ace201e4356f78  | 0 | 0 | 0 | 2 |
| b0ddc726cf82093b4123d979044b3faf  | 0 | 0 | 0 | 2 |
| 6e18f6682ba2347cbb70215f92d95fce  | 0 | 0 | 0 | 2 |
| 7e57f49b081e166829ca742bf1ff10b5  | 0 | 0 | 0 | 2 |
| b10ea668cc210646737066b1ad187f87  | 0 | 0 | 0 | 2 |
| d5176c916805d3c0a91010ca37440f4c  | 0 | 0 | 0 | 2 |
| 02f5cc4f52ae508b16908792f4cf23eb  | 0 | 0 | 0 | 2 |
| 43aff036eb6b9f860bbc2ec3bc4bb7    | 0 | 0 | 0 | 2 |
| 38d938a8d0f7de8cb819bb0e5451662f  | 0 | 0 | 0 | 2 |
| 5e51e88b8b9bbbed1cace1eb32466cf94 | 0 | 0 | 0 | 2 |
| 4b334b89d3d20fecb8ad43ed5422b837  | 0 | 0 | 0 | 2 |
| f4ebf2635119787b8014384542c72597  | 0 | 0 | 0 | 2 |
| a889b24747ccc86ea1c6240132f5acdf  | 0 | 0 | 0 | 2 |
| f1f487a27899f4f188dabb0677cd937e  | 0 | 0 | 0 | 2 |
| 6258d6ecdd95a8c4d5df53bc9d57f230  | 0 | 0 | 0 | 2 |
| cfae7c4eef19abb85d9acd25791a9b68  | 0 | 0 | 0 | 2 |
| 965e4cba021c6f3bd50bde4d4cf4fa24  | 0 | 0 | 0 | 2 |
| 73cb4353eb2ccdf8b7db902867c07914  | 0 | 0 | 0 | 2 |
| 92083da8226f43e004c29a8420e45182  | 0 | 0 | 0 | 2 |
| 7f2a63df26f3dc1d04c394ef1873317c  | 0 | 0 | 0 | 2 |
| 3d81dd9d130211d076a647cb603cd599  | 0 | 0 | 0 | 2 |
| 923987f54f54b1c943793f98eb48c6b1  | 0 | 0 | 0 | 2 |
| b4ee0d3c89b9277daf2b8cee3063ee73  | 0 | 0 | 0 | 2 |
| e02b028ba39f6f1564a9086f1111a4b7  | 0 | 0 | 0 | 2 |
| fcf8d6a18c90a9700c3e0c00785cb6b4  | 0 | 0 | 0 | 2 |
| d8e1d34aaeeb468215a7f151d4a3afa0  | 0 | 0 | 0 | 2 |
| 80f878d6186738b9401f32ec40c2955d  | 0 | 0 | 0 | 2 |
| b16b3facb940395b03c7ae02f3ff3b14  | 0 | 0 | 0 | 2 |
| 9cecd4c5c801a0b0295ee0fb6f670b58  | 0 | 0 | 0 | 2 |
| 7d5a7f247ae42829f680182a17ea9d38  | 0 | 0 | 0 | 2 |
| 7d2fefad6af39d6be518ccb3bde2e70c  | 0 | 0 | 0 | 2 |
| 63e41aa1fc97d833398847bc0ae19ed5  | 0 | 0 | 0 | 2 |
| b9083159e4cac86c32711955edd75059  | 0 | 0 | 0 | 2 |
| 703f2744c9499d4595ef676bf2e30c72  | 0 | 0 | 0 | 2 |
| 1b1db46ab0a31dff012dd60dcb4d8698  | 0 | 0 | 0 | 2 |
| ae6de53f447b025ce85b3a8f06fd29b1  | 0 | 0 | 0 | 2 |
| d3b72101e46a684f17314a2ef1de2673  | 0 | 0 | 0 | 2 |
| 8f023a92b14f65cc84d3985bd76ab113  | 0 | 0 | 0 | 2 |

|                                  |   |   |   |   |
|----------------------------------|---|---|---|---|
| c2a9cf271bccdd115abd58d6ea689bbb | 0 | 0 | 0 | 2 |
| e478965c9261a48b1a2a702a95fbfd4e | 0 | 0 | 0 | 2 |
| 390dd5b084e4c74b7534ff49ec59af00 | 0 | 0 | 0 | 2 |
| 1b178a24c7df32a3da4ae1d5fbdf625d | 0 | 0 | 0 | 2 |
| 1c885cbeacfa276ddc29d063616dfd74 | 0 | 0 | 0 | 2 |
| ba0667bf8d6cc234a0964038d6e7f0a5 | 0 | 0 | 0 | 2 |
| bb9d936dee25bbcd59ecd31fdfe2de36 | 0 | 0 | 0 | 2 |
| 14678841d1fb069d77b5d560cf64d357 | 0 | 0 | 0 | 2 |
| a31a64457cb50d3864d0dddccafb23c1 | 0 | 0 | 0 | 2 |
| c01c82e7faf625ab356b8d7ca043551e | 0 | 0 | 0 | 2 |
| 75c6431b42de0d37dba9b1fef8d97201 | 0 | 0 | 0 | 2 |
| ed9a930da5fa3a1c0bfdf1880ca1b0d4 | 0 | 0 | 0 | 2 |
| 25e14fef5c0b532fae858a4cf72e8734 | 0 | 0 | 0 | 2 |
| 5da3beeb702c86f18410a38f9e0977d5 | 0 | 0 | 0 | 2 |
| e197c467696801daa8e3801b76c0ae55 | 0 | 0 | 0 | 2 |
| b313018a5932cfa50901fbef89b04730 | 0 | 0 | 0 | 2 |
| 42ab1ea24db6270fe900969d4cefd847 | 0 | 0 | 0 | 2 |
| b228bcc2b6c7d6911f68eff541ab8e3  | 0 | 0 | 0 | 2 |
| 9740edb15f49654b1359559f14ffd8a5 | 0 | 0 | 0 | 2 |
| 5b2bd83d64f3c511d90738e2951a4fb0 | 0 | 0 | 0 | 2 |
| 71b70dc4b2300308e37a1a8a312886c3 | 0 | 0 | 0 | 2 |
| 04fb2961568a30a8387a15b6b2c0c6aa | 0 | 0 | 0 | 2 |
| 5f31d60adc87b2da1fbd35c41615b920 | 0 | 0 | 0 | 2 |
| 00b9c415f8030feceb62089f8daf2342 | 0 | 0 | 0 | 2 |
| 42f39fd35570a0f5759056512ec7c08d | 0 | 0 | 0 | 2 |
| 75fae6103e582deb5e601021e5a7b2e5 | 0 | 0 | 0 | 2 |
| c5524573fc7ae3552fc1cac8f480e769 | 0 | 0 | 0 | 2 |
| 25335b3d02747b7b584957d87b1ff1e4 | 0 | 0 | 0 | 2 |
| fa13200d9a4ce49f015b1b8c47ddd08  | 0 | 0 | 0 | 2 |
| d73caaeab86ade27089d2dd177600962 | 0 | 0 | 0 | 2 |
| 156b80f81c9d30a32c078ffdf35307f6 | 0 | 0 | 0 | 2 |
| 5020bab9d15f3065253c1b4fe53bba1f | 0 | 0 | 0 | 2 |
| 1cb84cdf07072d80eb77c935cce85e9b | 0 | 0 | 0 | 2 |
| 2a28a4362ddac1147a510a6209a97ffa | 0 | 0 | 0 | 2 |
| d7bec3f16a332628bef28042f75b1c8d | 0 | 0 | 0 | 2 |
| 424351ac4d86293096be0bba9fd3596e | 0 | 0 | 0 | 2 |
| 259a0a8b00a692159ab58d7797d32c7c | 0 | 0 | 0 | 2 |
| 8b7fe55a51119e2d1d7900399ee2f0ad | 0 | 0 | 0 | 2 |
| 7e7c76497f2415115d8ca87cf530e7e9 | 0 | 0 | 0 | 2 |
| d871aa133d15c909de0639bdee7fe2c8 | 0 | 0 | 0 | 2 |
| 803ba6f4dc77850f5e3d99473b6e1254 | 0 | 0 | 0 | 2 |
| a63888feb73d7878ff03fefab97a51d6 | 0 | 0 | 0 | 2 |
| 2b7d98b0cdda4c045e421e289f046812 | 0 | 0 | 0 | 2 |
| 81b3c045b017fe743082413c3e9ffa3d | 0 | 0 | 0 | 2 |

|                                   |   |   |   |   |
|-----------------------------------|---|---|---|---|
| ce45e23670564325b5539518334feccb  | 0 | 0 | 0 | 2 |
| cac2c6b73f26c5b7be36267f456b3e2d  | 0 | 0 | 0 | 2 |
| baea97a74c44467e2702622ca81a01fd  | 0 | 0 | 0 | 2 |
| 31b63258e298c72547104836a469c957  | 0 | 0 | 0 | 2 |
| 3cc5f60d62777f701fc53092c11510f1  | 0 | 0 | 0 | 2 |
| e9a17a90d4a5fb92d3c8a0414156cefa  | 0 | 0 | 0 | 2 |
| 1e462af481f31fed41a749cba916ede3  | 0 | 0 | 0 | 2 |
| 3134bb159c9bb1e2542a378724eaa1b4  | 0 | 0 | 0 | 2 |
| 6f8ac08d68be1de032add87062946e97  | 0 | 0 | 0 | 2 |
| 48afb076a84b8ff3d5e63d61cc6175e   | 0 | 0 | 0 | 2 |
| fd715d7ecf24405f1ad4bd05be2036af  | 0 | 0 | 0 | 2 |
| d12e8057a847f7a754c14a37d99c45e5  | 0 | 0 | 0 | 2 |
| 8aa2211a723abd96553cc4eb53d75871  | 0 | 0 | 0 | 2 |
| f6741ff33fc51ba10af8877f8e052977  | 0 | 0 | 0 | 2 |
| f4cf22b4395459221bd3239f07e2ffad  | 0 | 0 | 0 | 2 |
| 6e64f72a5a8df1957dd305b0e117abb2  | 0 | 0 | 0 | 2 |
| 88b827914321580449df50ed7d81ee68  | 0 | 0 | 0 | 2 |
| b1ed60a3ef4fba48eccdb0db4e278e8   | 0 | 0 | 0 | 2 |
| 1cbb6252e896499beffff6ee6deb425d1 | 0 | 0 | 0 | 2 |
| 31a788fd33b31e4f48c3cbac85e3b063  | 0 | 0 | 0 | 2 |
| bd1241e13116998acc1fcca80ca0a9ee  | 0 | 0 | 0 | 2 |
| c80525e0a4e7e87e955b38bafbc43e2a  | 0 | 0 | 0 | 2 |
| 985d4b0167e6bad26a8b11c2406e8e04  | 0 | 0 | 0 | 2 |
| 3fe5fe81d22e28187fe2991b420e6a24  | 0 | 0 | 0 | 2 |
| dc5e875d617f875b3f0c5c7080155536  | 0 | 0 | 0 | 2 |
| 9802a87359e70555175e1d200ec73d30  | 0 | 0 | 0 | 2 |
| 91811c319bf904665873390051d49011  | 0 | 0 | 0 | 2 |
| e399a9deeffff25fae8f4c992b76e0d48 | 0 | 0 | 0 | 2 |
| 725b3ded744140bba51f96d4235b3af6  | 0 | 0 | 0 | 2 |
| 3c475886bcf7a5f76fa094169a6c1cc7  | 0 | 0 | 0 | 2 |
| c0beb1ba290922993e14f515d93dfa76  | 0 | 0 | 0 | 2 |
| 07546b2762eb64146ee10dae9c6a7d0f  | 0 | 0 | 0 | 2 |
| 9d3407639055a22bbdb222bd01c239b1  | 0 | 0 | 0 | 2 |
| 4d40bce8e97a6a6fe7b3ba3577b6fd93  | 0 | 0 | 0 | 2 |
| 7bbaa8939e01889232466ba88f09a23f  | 0 | 0 | 0 | 2 |
| 81d61a4b5f9995b2d4fa8ed0dbdbf25a  | 0 | 0 | 0 | 2 |
| 8974280c1e7372ddd22d18f8df5e1c90  | 0 | 0 | 0 | 2 |
| 2c28a0313963f4ccc0bbd412d76450e8  | 0 | 0 | 0 | 2 |
| c849806c748ce786645426a4408cd1b5  | 0 | 0 | 0 | 2 |
| 2515d7583b3cf7b507fd51168f762f15  | 0 | 0 | 0 | 2 |
| 4117b63cfe6943a1984bbce6f62567dd  | 0 | 0 | 0 | 2 |
| 1483dc67dae69b77aa733afd6f0aec73  | 0 | 0 | 0 | 2 |
| 340eaa0d9183384854c283e7751c0717  | 0 | 0 | 0 | 2 |
| f548b8b37052314a4b9b89eee4a9b054  | 0 | 0 | 0 | 2 |

|                                  |   |   |   |   |
|----------------------------------|---|---|---|---|
| a599e90f8848e32cdd13caf7f3a10401 | 0 | 0 | 0 | 2 |
| 8688fbd8e48b140fd46feda377fda7c6 | 0 | 0 | 0 | 2 |
| 75b6ec8117a9aa8c43ee1be66021279b | 0 | 0 | 0 | 2 |
| 7da44db9062b354746d7102742f4095b | 0 | 0 | 0 | 2 |
| 4ba3de8884021dbde06b06b583546063 | 0 | 0 | 0 | 2 |
| ea51cf793b48b307fecf20a042c7e300 | 0 | 0 | 0 | 2 |
| 6fa56eef233330f5bb3ca2e782afe7ba | 0 | 0 | 0 | 2 |
| 10e1cf604869a4cc9fb4129b4e2fe0db | 0 | 0 | 0 | 2 |
| 5297fe6b0e12a09bffcb4bc4c2f7b370 | 0 | 0 | 0 | 2 |
| c5f8dbf3e7dad7025a67712b2996a469 | 0 | 0 | 0 | 2 |
| 15405ca32011bade49b6fd6bf461ba09 | 0 | 0 | 0 | 2 |
| ccedae5128c08046b131eca2903884e5 | 0 | 0 | 0 | 2 |
| 4830e7c6e9cbe4f47ed8c75daa97ee7a | 0 | 0 | 0 | 2 |
| b5ead11315fa889e8dd0f16aff925c12 | 0 | 0 | 0 | 2 |
| c56ad001c6c11f9db16d1fe47a44eae7 | 0 | 0 | 0 | 2 |
| 911c800d42655183186962e15e079755 | 0 | 0 | 0 | 2 |
| 832f76250343eba67ce0dcefbfb9c5e5 | 0 | 0 | 0 | 2 |
| efeae55e07b1080bf50c96b9215887c5 | 0 | 0 | 0 | 2 |
| 5c69491dec89c3110d787bf6cd126e7a | 0 | 0 | 0 | 2 |
| 64215cdb3825519400a58f4e8b27ca95 | 0 | 0 | 0 | 2 |
| eb5872c5634637a0ee825e3a66cc24ad | 0 | 0 | 0 | 2 |
| d601f4a80f1082e78c12b916bb0887ae | 0 | 0 | 0 | 2 |
| e82cb2a2d300463f807b083e6d37170a | 0 | 0 | 0 | 2 |
| a05c754e5dd6b488e26db5650543b6b1 | 0 | 0 | 0 | 2 |
| bf574bfacd6d39cf075bf9b6801c8a9c | 0 | 0 | 0 | 2 |
| d26e5a18959d373ca668dbf82185108b | 0 | 0 | 0 | 2 |
| 21804c7728f690a75880f4242729b228 | 0 | 0 | 0 | 2 |
| f257bcdcdca44c3cc84726d463a5afa8 | 0 | 0 | 0 | 2 |
| 64a35b43f67c2ca903fa6810247b15b1 | 0 | 0 | 0 | 2 |
| 1a4cdc7c2cfc280b1f2ccbfb2c915fc4 | 0 | 0 | 0 | 2 |
| b7041bb7924d182b6566e27fbdf8da22 | 0 | 0 | 0 | 2 |
| ae46d218c7e5220ce474dff3cf21d00e | 0 | 0 | 0 | 2 |
| 2b8af889261afdf39b02f52243085e1f | 0 | 0 | 0 | 2 |
| 24e54934649f962ea8427907b3b47b1c | 0 | 0 | 0 | 2 |
| 9db7447864d8367401ae60187849582c | 0 | 0 | 0 | 2 |
| 093f0c282c7469f1214ca6a8b01f0bd4 | 0 | 0 | 0 | 2 |
| 52e6bdf87f09797f02d37ebdeca2746d | 0 | 0 | 0 | 2 |
| 28c1670977cb96cb29493e3f7c2171b7 | 0 | 0 | 0 | 2 |
| 782eb5b2a8c947ad3fe7b00778fd5d25 | 0 | 0 | 0 | 2 |
| 1050ba53ef62adfa9b97fcbba395b469 | 0 | 0 | 0 | 2 |
| c13401ec204642351ce0f0fbf43d02ad | 0 | 0 | 0 | 2 |
| eede5b12becc5ad4733f577e83a896cb | 0 | 0 | 0 | 2 |
| 9f83d0414f94a249ad30c49e84ecc19d | 0 | 0 | 0 | 2 |
| f2947de327f9eac4788b0980cdfd5114 | 0 | 0 | 0 | 2 |

|                                  |   |   |   |   |
|----------------------------------|---|---|---|---|
| 0ae61ca68c89f505687cf3a85baf0597 | 0 | 0 | 0 | 2 |
| 0ae08f244b40c6fa2371c167bdba07fa | 0 | 0 | 0 | 2 |
| c9a154ba9c935c666bc008c9d1a1d2a2 | 0 | 0 | 0 | 2 |
| 71bae4f7029e9b06edbcfbd4ae14e974 | 0 | 0 | 0 | 2 |
| 75f6c0ef4a38a6dfd257194ca3bec4a6 | 0 | 0 | 0 | 2 |
| 53466224d556df4adb72ebb343c5cb5a | 0 | 0 | 0 | 2 |
| 2d82cd2313940588668a0210aee4289f | 0 | 0 | 0 | 2 |
| b1b3c71bee9c4523479555c50ac80ae0 | 0 | 0 | 0 | 2 |
| e4a371ea76aa6ddd6a145258b94f02b1 | 0 | 0 | 0 | 2 |
| 36e2d7b08eff5162759762e84c3cd5d3 | 0 | 0 | 0 | 2 |
| f035890512503af541d2e646d0edfd0c | 0 | 0 | 0 | 2 |
| 33eb2069741a0de9638caf1056b1bfdc | 0 | 0 | 0 | 2 |
| e3bd896faedb38e756771123e301699f | 0 | 0 | 0 | 2 |
| 87eb5ddc5ec5c59000cfb3b6dec4660  | 0 | 0 | 0 | 2 |
| ab21b0c3f961f48096701e75ae49d694 | 0 | 0 | 0 | 2 |
| d96b24f800776089dcb7fcb27e387a0c | 0 | 0 | 0 | 2 |
| 7b1d0ddab185563b19fd7c085cf99d07 | 0 | 0 | 0 | 2 |
| 0c47ae8056ffe525b0ce89608fe6ff6e | 0 | 0 | 0 | 2 |
| f764b8b866bfab9ac3f1ef2dbdefeb03 | 0 | 0 | 0 | 2 |
| 14dbc967637ca63e98df974bf84f5075 | 0 | 0 | 0 | 2 |
| 55aa6d7c1593c3c3e7ebdc8fa1b66dfb | 0 | 0 | 0 | 2 |
| 7a88e9b35e7da5892ac3432ce0cb3cde | 0 | 0 | 0 | 2 |
| 427d795df6860631d5e90ac298455e83 | 0 | 0 | 0 | 2 |
| 9cbadc9b3c30f30fc1e70ed55bb7d664 | 0 | 0 | 0 | 2 |
| 938478dfac80b057b8b8458cb4f24557 | 0 | 0 | 0 | 2 |
| 814128c968b369f89ffc01ca2c8ac7b9 | 0 | 0 | 0 | 2 |
| 10b72229ff2bd166616a97cdd212ec93 | 0 | 0 | 0 | 2 |
| 741817ff7beb616fce423a62d4525f77 | 0 | 0 | 0 | 2 |
| b56ffc18fafc4978547b37921042b53c | 0 | 0 | 0 | 2 |
| 641b98899b4dddd6fdc43f1c2ddffcdd | 0 | 0 | 0 | 2 |
| 9cefc25d16e7aa710e3564d11c63acba | 0 | 0 | 0 | 2 |
| d9a1cd1d1e417ed0106cd16cc809ea03 | 0 | 0 | 0 | 2 |
| bb9377949a7aa667e8cf8754179beebe | 0 | 0 | 0 | 2 |
| 85fa3103e30d3f7fbd159e29efe0de8f | 0 | 0 | 0 | 2 |
| ec527d46b455ebb9bb284f0a26e94b13 | 0 | 0 | 0 | 2 |
| c4246294838dd5b40c73c5ba9715f6cc | 0 | 0 | 0 | 2 |
| a2840b0c79270d5cd80aabb90a25c97  | 0 | 0 | 0 | 2 |
| 5250dafde1664444744ac87b28ceb704 | 0 | 0 | 0 | 2 |
| 23ecea38fdef7fbf69978d10922e96c0 | 0 | 0 | 0 | 2 |
| ebfab57f9e2672ad34d0191b90f6eeac | 0 | 0 | 0 | 2 |
| 3dc9e66adff347134758b9cd015d7612 | 0 | 0 | 0 | 2 |
| 0d2a0e7c88ff4698e7186c6295711d85 | 0 | 0 | 0 | 2 |
| f406017d2fb3b45e26cea19beda127ef | 0 | 0 | 0 | 2 |
| 453167c478944487efb3836152f340f9 | 0 | 0 | 0 | 2 |

|                                  |   |   |   |   |
|----------------------------------|---|---|---|---|
| f6ca73d0d8bd1898c1dca211c5814872 | 0 | 0 | 0 | 2 |
| ee5110ee38d8297918ff261cefefd679 | 0 | 0 | 0 | 2 |
| f36dca5b2f38ccb07b0a71a864c38eed | 0 | 0 | 0 | 2 |
| 574268a0e3299772459049fc020a9487 | 0 | 0 | 0 | 2 |
| c9172f7e2331f367966364a91beda390 | 0 | 0 | 0 | 2 |
| 31d4598879fb5456131c2befbb9a3ee4 | 0 | 0 | 0 | 2 |
| bbdae61e81b634dca68570f4d86c682e | 0 | 0 | 0 | 2 |
| b63f36fe72c339d1608c650e80423d35 | 0 | 0 | 0 | 2 |
| 567ecf48ecf555769f7e87aca71b2745 | 0 | 0 | 0 | 2 |
| cc80caeb218d9243aa1cf9380486f44a | 0 | 0 | 0 | 2 |
| f931114639c6371e59a483169f257e5c | 0 | 0 | 0 | 2 |
| 22e79b55cee5bc64a0b80e1304535dae | 0 | 0 | 0 | 2 |
| 75703b537ddbcad6c6e257973236bd57 | 0 | 0 | 0 | 2 |
| ab65302793b1860976b187614261d33a | 0 | 0 | 0 | 2 |
| c2cfe21bcfe49df3e4646c2e2ac7e228 | 0 | 0 | 0 | 2 |
| 8b7041e2800de8d097366e420781ada1 | 0 | 0 | 0 | 2 |
| a49928506ac7790ccd0064233f529a6b | 0 | 0 | 0 | 2 |
| 43658ab5fcb15f2e94241980b43512e7 | 0 | 0 | 0 | 2 |
| a66081d52c3baf116872b9049bb4e501 | 0 | 0 | 0 | 2 |
| b4b97628364f2a1051be58eea7e73fde | 0 | 0 | 0 | 2 |
| 547afe5d6b57fe721971082862d65ed2 | 0 | 0 | 0 | 2 |
| e30fcff7165361be6b6e35ffdc822abe | 0 | 0 | 0 | 2 |
| 6592e55f6ca45feeee57c821880dff2  | 0 | 0 | 0 | 2 |
| 117040aa6526f8d841c3d26c5eac4e59 | 0 | 0 | 0 | 2 |
| cdccc3d0bd266c9aea47f3fbbd6718fc | 0 | 0 | 0 | 2 |
| f29509dc66b5c0e940a903f4a1556593 | 0 | 0 | 0 | 2 |
| 437d02cb1762a961f7e3529942c6c413 | 0 | 0 | 0 | 2 |
| 432d28e540dea33ecf9426d1b401e3a8 | 0 | 0 | 0 | 2 |
| bf6e6f0cf961ffb0f0338623aae67e64 | 0 | 0 | 0 | 2 |
| ee076f4eaba6e1f0d20fbe66ef342d62 | 0 | 0 | 0 | 2 |
| a77967c9446b1085ac5b5d88a3bb36cb | 0 | 0 | 0 | 2 |
| c86ab1c94887e7318e76331c2923537e | 0 | 0 | 0 | 2 |
| bc9a467a5896aa7d97145630f45cb26b | 0 | 0 | 0 | 2 |
| 7d237e26dcd6ad8f826b0d0d6ca1d53f | 0 | 0 | 0 | 2 |
| af13198525fa98430d7cffd189ed38fe | 0 | 0 | 0 | 2 |
| 1720dba7de8b7bb74e2850d1551ca6f5 | 0 | 0 | 0 | 2 |
| e19fd70b69f7dfaa976f8ec55345b5c9 | 0 | 0 | 0 | 2 |
| 248032f3ae98ab98e0c46cc94cd647f9 | 0 | 0 | 0 | 2 |
| 153cd6f8baf1b996862f729e522ee528 | 0 | 0 | 0 | 2 |
| 893e44a7d0f235cda8c15e317d6432b5 | 0 | 0 | 0 | 2 |
| 89be5e1565c1ab3e37def2ed66586a45 | 0 | 0 | 0 | 2 |
| c9eebd5ecf9007c20a50a227d7541619 | 0 | 0 | 0 | 2 |
| 6a8f968051d9b17098f79e32b2631ce3 | 0 | 0 | 0 | 2 |
| 4422715ceaf6fe5303fcabc74210106b | 0 | 0 | 0 | 2 |

|                                   |   |   |   |   |
|-----------------------------------|---|---|---|---|
| 2c292a71f62bc76e1b8e9aec1a8c2bb3  | 0 | 0 | 0 | 2 |
| ff3508241c571b04b7675577a8cf878f  | 0 | 0 | 0 | 2 |
| 7af6ed6a41987fc9f7c3c094c9eb9902  | 0 | 0 | 0 | 2 |
| 6f64600625d893fc8588dfb3baabb934  | 0 | 0 | 0 | 2 |
| 3726cd8424a1d8ffbef509b6a08d6878  | 0 | 0 | 0 | 2 |
| c34f222d40dd26cd5b390763f5c663da  | 0 | 0 | 0 | 2 |
| fbcb7f7481188469ccb270343ee8c7ee  | 0 | 0 | 0 | 2 |
| 35bda290a2b7e1bdfdf1182b1b05a51da | 0 | 0 | 0 | 2 |
| a7ca86d9c791e3564e45987e19dd3088  | 0 | 0 | 0 | 2 |
| 58b271299aa9d6f7b8ecb0152000e4ff  | 0 | 0 | 0 | 2 |
| c9d401f9a250a10b6f30760cc837e0ec  | 0 | 0 | 0 | 2 |
| 72f6de184abd7e3b50811558c3aa40f1  | 0 | 0 | 0 | 2 |
| 12c9bf3a636c32e0699d1730b854cdb3  | 0 | 0 | 0 | 2 |
| 62eb036e4dce4d4ff5597c3afad658bb  | 0 | 0 | 0 | 2 |
| 2d7a4a3c8c6d112c159ca339f6dc250f  | 0 | 0 | 0 | 2 |
| 60402a3c9e769de2e1c22f253e055ea4  | 0 | 0 | 0 | 2 |
| 63237763c89f46c2fae42519e3f771c5  | 0 | 0 | 0 | 2 |
| 802f5582050199ac316df54cd19825e4  | 0 | 0 | 0 | 2 |
| 286587ca06105a295821ebd0d53319d7  | 0 | 0 | 0 | 2 |
| 1e042c65ccca56bd1f800bbebc5bce65  | 0 | 0 | 0 | 2 |
| 421a67f1e1d1210266509725f4f35cde  | 0 | 0 | 0 | 2 |
| 06a855f71e29d18f46907de16f45821e  | 0 | 0 | 0 | 2 |
| e8e113941f100208c7265a55d91cd072  | 0 | 0 | 0 | 2 |
| 3b69370850570bec6133db505a70464c  | 0 | 0 | 0 | 2 |
| 581f1222d31caaea3887d6b71cf91a49  | 0 | 0 | 0 | 2 |
| 12ac1a111741e7814eb32a71bdb581e7  | 0 | 0 | 0 | 2 |
| d48c8c80b9b96f9aa5e576e9d13253a3  | 0 | 0 | 0 | 2 |
| 020ff1da2ec60c64253bd79dc7212cb5  | 0 | 0 | 0 | 2 |
| 905f473c7f0a8cd3c0d662caafe98bbc  | 0 | 0 | 0 | 2 |
| 9ae508667ab1da9ce7e5dc209c92ff06  | 0 | 0 | 0 | 2 |
| 8f7368a1ece460faba97c88b0f7f0219  | 0 | 0 | 0 | 2 |
| 7e49f79fb86c444a4b9d902f9783495b  | 0 | 0 | 0 | 2 |
| 64e836c5c123f14d47d56fadc77edd8d  | 0 | 0 | 0 | 2 |
| 942c797699fb078925fb50861c877e93  | 0 | 0 | 0 | 2 |
| 22b3989bac7039255cc5b16e69fc3f72  | 0 | 0 | 0 | 2 |
| 2783e380cf308e3194d35dadf8557fea  | 0 | 0 | 0 | 2 |
| ab7213af8f7c7c0b6520cb71f4bf69c3  | 0 | 0 | 0 | 2 |
| ebe3cb080bbcebd6ec740324de5b1dca  | 0 | 0 | 0 | 2 |
| d67f40178c86bfa2210d5e33f691703e  | 0 | 0 | 2 | 0 |
| 72cc22117f33d6af6c4a4a63c9056329  | 0 | 0 | 2 | 0 |
| 74829151fe67cd2b39991dbb01deada3  | 0 | 0 | 2 | 0 |
| 1f202b96cfb4be93608993141124d14d  | 0 | 0 | 2 | 0 |
| f2aa6983f96e26ef96d1a3d5fcfb3f50  | 0 | 0 | 2 | 0 |
| 559758ffed1fdbbe036995423e27d301  | 0 | 0 | 2 | 0 |



|                                  |   |   |   |   |
|----------------------------------|---|---|---|---|
| 041a45252498e4b1d56b4e23c2670ab0 | 0 | 0 | 2 | 0 |
| 2a5ca46ade0eb9abf7250e783eb8dbb4 | 0 | 0 | 2 | 0 |
| 81746a4c854a020e75dd3d4023448419 | 0 | 0 | 2 | 0 |
| 44f9d522bb5c46558b8a6c4ef30fb194 | 0 | 0 | 2 | 0 |
| f46e7d79bc13ec3155f3fe36765cb06a | 0 | 0 | 2 | 0 |
| d1a087c72fbbefc1c7ce9a2ef8d350de | 0 | 0 | 2 | 0 |
| b5adf5fe29fd6cfa8b7b4f17beeb0c74 | 0 | 0 | 2 | 0 |
| 5fbdb65e73698efb8f26bc16b30724cc | 0 | 0 | 2 | 0 |
| 01348ae4dcfeedde7e975e0a75000533 | 0 | 0 | 2 | 0 |
| d8cdf15397ba98a271b83f47591f8499 | 0 | 0 | 2 | 0 |
| 5eaf906867ee890df5e71eec5f7bb814 | 0 | 0 | 2 | 0 |
| 6187b4211e4c5391810c66996b8707a6 | 0 | 0 | 2 | 0 |
| b921f7a91fc0809f66f6c23fe843f067 | 0 | 0 | 2 | 0 |
| e239614d7855c786f468b9e2db0b1f6c | 0 | 0 | 2 | 0 |
| f4a34adf8db295faf183d157991231be | 0 | 0 | 2 | 0 |
| 37b06a458a24173d957fd7c185bd1933 | 0 | 0 | 2 | 0 |
| dd3f12a61faf9f1e9672cc4a9f2e04c7 | 0 | 0 | 2 | 0 |
| 8de44fe20d60b42a671dcea9c3261550 | 0 | 0 | 2 | 0 |
| 84899d78f61da59ac0291ba058428c7f | 0 | 0 | 2 | 0 |
| 7cffba0dfe250c3d8beb48e71d33141f | 0 | 0 | 2 | 0 |
| 6c2dca72bd21af970a1fb1eb156dbec5 | 0 | 0 | 2 | 0 |
| b32d72076590a7df0a4a9cf9188ff084 | 0 | 0 | 2 | 0 |
| deaa8c6ea05e85e89f62c0c97bc86897 | 0 | 0 | 2 | 0 |
| 0b258f40589cbaa0ba2ee43b0f7b6785 | 0 | 0 | 2 | 0 |
| 4d2b7ae2d0d2464400620037a8e6aba1 | 0 | 0 | 2 | 0 |
| af6032e4f9efe2c45edb37f48d84a7fb | 0 | 0 | 2 | 0 |
| 9b7f17b9f00641b6519e301428bd1bf9 | 0 | 0 | 2 | 0 |
| 61a49b1300ca6e79deef7cc0fb6c3fa7 | 0 | 0 | 2 | 0 |
| 14114434dd36553eab5b4c9923c2ed6e | 0 | 0 | 2 | 0 |
| 1368f3eaf1fe3d40438425065fbf96b4 | 0 | 0 | 2 | 0 |
| 9d84535b49153224016337d843f3243a | 0 | 0 | 2 | 0 |
| 53f2463106f8df49e010b1ff518e2853 | 0 | 0 | 2 | 0 |
| e48200fcfe967ad0ec01a579d9d4cede | 0 | 0 | 2 | 0 |
| 2f471a145c0066c66063168f22e504b6 | 0 | 0 | 2 | 0 |
| 5cfcb295c4238ba12b7e10147949241b | 0 | 0 | 2 | 0 |
| ea8347946608e19a17844d4701da4faf | 0 | 0 | 2 | 0 |
| ff8c4ac1a8360fcdc99a8ec0bbe44c4a | 0 | 0 | 2 | 0 |
| b51dae93daf0694ff7ae9eef46c0954f | 0 | 0 | 2 | 0 |
| 4108f1604c823009c3504e5e52c2eeb1 | 0 | 0 | 2 | 0 |
| 187a463c9a48be5567286411e6b42b80 | 0 | 0 | 2 | 0 |
| 7f87488b218047bb73fc9d1d4d8646a4 | 0 | 0 | 2 | 0 |
| c78d468167addc590336c14948617e0b | 0 | 0 | 2 | 0 |
| 07038f79b2c9ef68d0df6d52c181f075 | 0 | 0 | 2 | 0 |
| 1b1237d0e5b39da0d06a841c370af0d7 | 0 | 0 | 2 | 0 |

|                                  |   |   |   |   |
|----------------------------------|---|---|---|---|
| baff4b70cd62c3b57bfdb3e5f9dd29fc | 0 | 0 | 2 | 0 |
| 50c0ab978bbf9a92ff5d57b6bd3a4f7e | 0 | 0 | 2 | 0 |
| a6e1091a9a6476eebb939d471b578bde | 0 | 0 | 2 | 0 |
| 22169e012ecd524a5578ce0c9fe8deba | 0 | 0 | 2 | 0 |
| c0f385ea906814a4dfa1d34d60f8dc49 | 0 | 0 | 2 | 0 |
| 31dfc16f4d461c27666f71bc0ae98b9a | 0 | 0 | 2 | 0 |
| b4341f5c66a0057997b4416ac6297abd | 0 | 0 | 2 | 0 |
| 5593c4fa1e5d27941b3f3d06aae7c424 | 0 | 0 | 2 | 0 |
| e41bf88fb7ed3aba88d0ffa6038ae109 | 0 | 0 | 2 | 0 |
| 40272c3a91bfe44392fd6a2b5c329968 | 0 | 0 | 2 | 0 |
| db48a5367586d57dd02a3b4b8fdaf3ea | 0 | 0 | 2 | 0 |
| c922b8f529eb734d135123ddc550bd01 | 0 | 0 | 2 | 0 |
| d95bc068c8941107cb8e091d2bbc8476 | 0 | 0 | 2 | 0 |
| ece180351af050133ad90a8d83ba3ee1 | 0 | 0 | 2 | 0 |
| 5ca9ca1f1d96cca823d7000c82b2b405 | 0 | 0 | 2 | 0 |
| 3d8ef37609f14f52f2621f7041c6c715 | 0 | 0 | 2 | 0 |
| e19fc4514bb7b91350eb5b96a09050a3 | 0 | 0 | 2 | 0 |
| fee3c6618689c3c9ef27d49ac1412146 | 0 | 0 | 2 | 0 |
| ce44a593dbb1b31eba6c6113c96b89c9 | 0 | 0 | 2 | 0 |
| f1577e380af47be4a4b4b53cd0301b0a | 0 | 0 | 2 | 0 |
| eb862a798f4c1173e79a488b5dec5f13 | 0 | 0 | 2 | 0 |
| f42863c67ad72494d4f1bfce6ba281e8 | 0 | 0 | 2 | 0 |
| e041be80842d948a514e5b109a6c36e5 | 0 | 0 | 2 | 0 |
| 96e009ace569771f0eedcc6df81910b6 | 0 | 0 | 2 | 0 |
| 5715c0d4d42c865fdec04c5045bed493 | 0 | 0 | 2 | 0 |
| b61c600fc6dceb76cf3016c67be53c00 | 0 | 0 | 2 | 0 |
| eb5850cb83c0997f8c99cb26f54e19f6 | 0 | 0 | 2 | 0 |
| 0e8c7bb31c8b7033344bfc54b9c73baf | 0 | 0 | 2 | 0 |
| 8cff1445a04fd555d42e92e8741bf19b | 0 | 0 | 2 | 0 |
| 427101db25dc568b6c1a62d4daf5da41 | 0 | 0 | 2 | 0 |
| f21e92f67c6e0b01230c4c98568ed261 | 0 | 0 | 2 | 0 |
| da2d8085ee4fe7e2150115ff7e730957 | 0 | 0 | 2 | 0 |
| 0065927717a35569be3f789dc2e34c7b | 0 | 0 | 2 | 0 |
| 62f6e9534306e3dd85f2fd23ffd10898 | 0 | 0 | 2 | 0 |
| b14b75984c4e63ebd2a3767d9c79122a | 0 | 0 | 2 | 0 |
| 49e0ef880fc4ef8252390b8cf59eb661 | 0 | 0 | 2 | 0 |
| 956dca857604dfb3787e04d149a6f8e1 | 0 | 0 | 2 | 0 |
| 3d093b385674dddc5e8d468b7ab53705 | 0 | 0 | 2 | 0 |
| 8329237f24e1360184e8c76184c8d117 | 0 | 0 | 2 | 0 |
| 97591d6436f7fea989cf26268cd76994 | 0 | 0 | 2 | 0 |
| 200b0074eeecf9fc7f1f9a1d27651aaa | 0 | 0 | 2 | 0 |
| b38cfafb18b33abaa6c7feb1bfe26687 | 0 | 0 | 2 | 0 |
| 52edf96c46af04d2e4076f094b440dcf | 0 | 0 | 2 | 0 |
| 3d0a3482e49f95b01b86a6491fffe7f9 | 0 | 0 | 2 | 0 |

|                                   |   |   |   |   |
|-----------------------------------|---|---|---|---|
| df9f127f34e52758c22bb8768ea9dd1d  | 0 | 0 | 2 | 0 |
| 292130cc7e41974fe374a0e32a14207d  | 0 | 0 | 2 | 0 |
| 3d1c00cecf38bf171a01ed1feb4f638f  | 0 | 0 | 2 | 0 |
| 80d53faed65bdb685750ec884c376bb3  | 0 | 0 | 2 | 0 |
| 695c760b30a9cfa90f2d77e12085946e  | 0 | 0 | 2 | 0 |
| d94c906e82992c77062645c6aebff368  | 0 | 0 | 2 | 0 |
| 70673581b60706b17ad6d44886447096  | 0 | 0 | 2 | 0 |
| 4a52c7f4bc13032ed8633c1de890816f  | 0 | 0 | 2 | 0 |
| 7715f4cd153f733fa610f5f7190eee5d  | 0 | 0 | 2 | 0 |
| 6f2e88549e66e23f8157e6ec8a4838d7  | 0 | 0 | 2 | 0 |
| bb02ecd37e7159cd74842ade7959df63  | 0 | 0 | 2 | 0 |
| a99038fc7a8d428f1d39cb4f6952413e  | 0 | 0 | 2 | 0 |
| 2e640fac48f25033b68d85694ff00aaa  | 0 | 0 | 2 | 0 |
| 57231513890c3d93b7a83c1b096dd67f  | 0 | 0 | 2 | 0 |
| bcb1929ccba87ea079f58f37bd76eab3  | 0 | 0 | 2 | 0 |
| cae46f12dfa6fdbcb29789dd7079257c4 | 0 | 0 | 2 | 0 |
| 108e87cb4791c4cc54312cbabbcc1a00  | 0 | 0 | 2 | 0 |
| e956a852fc17582cd57bfaebbe006ac5  | 0 | 0 | 2 | 0 |
| c0d4771cef12ecd1d24f353016e446fb  | 0 | 0 | 2 | 0 |
| 688e7b504734ec6df7d4016d77c1d4    | 0 | 0 | 2 | 0 |
| d2b01bf3b6558f0bf873e2a4476efc4e  | 0 | 0 | 2 | 0 |
| 3e28c8a609a40f72580bea8676424bdf  | 0 | 0 | 2 | 0 |
| 3c5e528f769c693dd22ad4deb44da77c  | 0 | 0 | 2 | 0 |
| f0578a32aebf203b7462de6666fdc0f3  | 0 | 0 | 2 | 0 |
| 044844e79fd56ec510d090753e59a8a3  | 0 | 0 | 2 | 0 |
| 829854e2923171f56ea37220a621688a  | 0 | 0 | 2 | 0 |
| 42215c300b47fb06df9b62f34bd90aaa  | 0 | 0 | 2 | 0 |
| 3ef227eda928d1834286f8d60e059772  | 0 | 0 | 2 | 0 |
| 456dd8a73899bfd8224b1dd617ff8b40  | 0 | 0 | 2 | 0 |
| 9690cf015c5772e43cab757c2cc088f0  | 0 | 0 | 2 | 0 |
| 0b9b50e6f373e687577da130663c98b8  | 0 | 0 | 2 | 0 |
| b254f77ebd40f591ba241aa2f1bfd68a  | 0 | 0 | 2 | 0 |
| f753e175ada981cc768020fdadb4139b  | 0 | 0 | 2 | 0 |
| c04182e82afbc9c2369fa452f3cc9c5c  | 0 | 0 | 2 | 0 |
| fc1705af5f7755948d946add36ee4400  | 0 | 0 | 2 | 0 |
| 63355510bee1c0a73c1b0b19c9e914ef  | 0 | 0 | 2 | 0 |
| c254bc1847d7788f1d25b0e28fa2f741  | 0 | 0 | 2 | 0 |
| 74abc552c3b72979ec87fc0df9bba750  | 0 | 0 | 2 | 0 |
| 345c602edb124098a7cbeb36b7a87c4d  | 0 | 0 | 2 | 0 |
| b6d092dd705d001d1c2e595c41126b0c  | 0 | 0 | 2 | 0 |
| cfe4f2fcab0d6edf934c152d991dde4e  | 0 | 0 | 2 | 0 |
| 70ede5656f20c6873e2fb1b9cfaedaeb  | 0 | 0 | 2 | 0 |
| e3760eeaa237c67a63f55bc68a24ebe4  | 0 | 0 | 2 | 0 |
| 264dca974e0eb4e5eed82c02b5e41a77  | 0 | 0 | 2 | 0 |

|                                  |   |   |   |   |
|----------------------------------|---|---|---|---|
| 61f341ea8ca09acddcdd8326edc1d873 | 0 | 0 | 2 | 0 |
| b1360eb8b6ffc3ef84c15669e37faf6a | 0 | 0 | 2 | 0 |
| c22d6bbf18f4a1794caa3671216f0900 | 0 | 0 | 2 | 0 |
| 4dd73e4c68d4fb48a484cf7b1b434715 | 0 | 0 | 2 | 0 |
| 2ff9a3032c117bf75a7af21868499848 | 0 | 0 | 2 | 0 |
| 587200ba1489688837bd7f02f6e97105 | 0 | 0 | 2 | 0 |
| 2183075a07029992a1e14ea9ab6242a1 | 0 | 0 | 2 | 0 |
| 03e7b1ccbbd2e30f0285a5ecb4420a50 | 0 | 0 | 2 | 0 |
| 366a83a5cc937d05b6dbc19665f96b26 | 0 | 0 | 2 | 0 |
| 3e9ce744e0f0c8ef4e456ddb7445b0f6 | 0 | 0 | 2 | 0 |
| f7c91c05d37d5a6260d1b59518e39691 | 0 | 0 | 2 | 0 |
| 147c2df4b442c0a6750f07f8ae6c7ca9 | 0 | 0 | 2 | 0 |
| a6f80c16647924fe02712a48f90603fd | 0 | 0 | 2 | 0 |
| 5a25e677e1e9a739d314b2e3036a3110 | 0 | 0 | 2 | 0 |
| 1bf6a20ce1539bd2fa96a7fbaa179ae8 | 0 | 0 | 2 | 0 |
| 30e7cb5038d959e4ede042848c11430f | 0 | 0 | 2 | 0 |
| a91a99c5222ae25803d33fe57b016bdf | 0 | 0 | 2 | 0 |
| f895dd490be7bb9178018ee4e0961a17 | 0 | 0 | 2 | 0 |
| edbd3c42f81139d78a0085a241d7e9b7 | 0 | 0 | 2 | 0 |
| df2208cf01f1fd8047c0ed169a29000a | 0 | 0 | 2 | 0 |
| 78e5480a10474b5682d6f4638aaa54bc | 0 | 0 | 2 | 0 |
| 21406749acb82336bddd590c3d2d954  | 0 | 0 | 2 | 0 |
| 561706656c3041b702a38dcf33e37c4e | 0 | 0 | 2 | 0 |
| ac46651e56bee40f8804fc12ad7eb991 | 0 | 0 | 2 | 0 |
| 61aff13f4ecce8345a639ac2f8583ece | 0 | 0 | 2 | 0 |
| 13b59a13d86d8eedc49b204dae60dac3 | 0 | 0 | 2 | 0 |
| 266ed0b6c90e5ddde40e2b041cbdb144 | 0 | 0 | 2 | 0 |
| fa936a1a7d603f261e9e72162988f474 | 0 | 0 | 2 | 0 |
| 370a17e3841ad56175dc7949844226fb | 0 | 0 | 2 | 0 |
| db1e86b6a385d7e5e9e75a84798c7f6f | 0 | 0 | 2 | 0 |
| a97854c3231a34cef603af78073cac77 | 0 | 0 | 2 | 0 |
| 5983bb732b9be773b81af3d38a5bbc6c | 0 | 0 | 2 | 0 |
| 20339aa37eea8d5b52229d2d91648402 | 0 | 0 | 2 | 0 |
| c91068ff50bd22b60d92ec6560719a5b | 0 | 0 | 2 | 0 |
| 1549fa96c78bc3602e17acff81cd1327 | 0 | 0 | 2 | 0 |
| d4ea89820b7d03747a5bb5396f430770 | 0 | 0 | 2 | 0 |
| 6ddb90f81675762a4eb55c05417330d  | 0 | 0 | 2 | 0 |
| 46ebdb5e5be36c2ffde747c863428f25 | 0 | 0 | 2 | 0 |
| 1f27448e329c9f1c33e8a24c9e8f7cf7 | 0 | 0 | 2 | 0 |
| 8e7cfe6ed0bcaa8ca1817a2f2aa502f0 | 0 | 0 | 2 | 0 |
| 9e1a44541ff7def6debc5949791e652  | 0 | 0 | 2 | 0 |
| 3e4524a0e65a778911f6e88848d99aad | 0 | 0 | 2 | 0 |
| 3e06e87dfea219510496ae340dc0406f | 0 | 0 | 2 | 0 |
| 8d01904225ea5788c734bcb2bb3e067c | 0 | 0 | 2 | 0 |

|                                  |   |   |   |   |
|----------------------------------|---|---|---|---|
| 361569a6077e8e3f5f00b99da5ea92f8 | 0 | 0 | 2 | 0 |
| 2351aa3d66ff498bb181543c24ca1e42 | 0 | 0 | 2 | 0 |
| a0e1186511f794a954b6b3a08a745aff | 0 | 0 | 2 | 0 |
| 17d4bfbfe750eb259a4653594529835f | 0 | 0 | 2 | 0 |
| 720b98173433610ea122869fb92dfd31 | 0 | 0 | 2 | 0 |
| ffd98f48cdc1e6f63a0498033150cb36 | 0 | 0 | 2 | 0 |
| 9fbfa2449ae12e5d8a443506a5c9a639 | 0 | 0 | 2 | 0 |
| b8bd30c78807f2e592cd6b60e4721e25 | 0 | 0 | 2 | 0 |
| e39dac6f5258895b81070858baf7a547 | 0 | 0 | 2 | 0 |
| 6339822ae0781d077a582447f40d37c9 | 0 | 0 | 2 | 0 |
| fc7d6cea875c8d05762245f1ce3841d5 | 0 | 0 | 2 | 0 |
| fed190439eccab1663762019879dbc70 | 0 | 0 | 2 | 0 |
| ce44a69f25755c2f94bb73ccb986413e | 0 | 0 | 2 | 0 |
| 68045fb08430a0f77d896e30e1ec91bc | 0 | 0 | 2 | 0 |
| fe71b406a4f78b6745e66477dee394bb | 0 | 0 | 2 | 0 |
| 94ec5605107facfe85d59b63f73f632d | 0 | 0 | 2 | 0 |
| ba2bc3cd4ebbef1cc26f5d26fc875fcd | 0 | 0 | 2 | 0 |
| b6707126bc4f684e1510abe36dbc12f6 | 0 | 0 | 2 | 0 |
| ee7247205d9a6f7381f49229a2122e3b | 0 | 0 | 2 | 0 |
| 1f90a869dca78b722b81cf5230ed2150 | 0 | 0 | 2 | 0 |
| c566b8cc578ea6289b48ed584e70eb8e | 0 | 0 | 2 | 0 |
| e477191d56924c8e75768164b6f76ab4 | 0 | 0 | 2 | 0 |
| cda02e0acb1429c084c59df5489552fb | 0 | 0 | 2 | 0 |
| 14db167bdc63adc2b228b162de17b79b | 0 | 0 | 2 | 0 |
| 881ae56d0c8bf9771bd4a3cbd41446ce | 0 | 0 | 2 | 0 |
| b7da6dc7b965204a9550df3382cf0c5c | 0 | 0 | 2 | 0 |
| 88d0d34a90b0c77b9178828b73344d67 | 0 | 0 | 2 | 0 |
| 85fb119d4505328d3c15e717be5f2d34 | 0 | 0 | 2 | 0 |
| 14cf686fa4c710b8de2f75a94b3c94a2 | 0 | 0 | 2 | 0 |
| 371eafc04510cb04d87e2a36817a9d37 | 0 | 0 | 2 | 0 |
| 094792dd8a40cfbcafd5b217df79a2b  | 0 | 0 | 2 | 0 |
| f2524e6157265e8e3f175ce97e240d5e | 0 | 0 | 2 | 0 |
| 444ea2ab4cd3015fd84093b6902c05e9 | 0 | 0 | 2 | 0 |
| feff0b34247157d2fb5ffbd715cc74a7 | 0 | 0 | 2 | 0 |
| b15869dcf1a3548e9b813060a1200e7e | 0 | 0 | 2 | 0 |
| f1a029ff161fdceb856ca7debaad0209 | 0 | 0 | 2 | 0 |
| 05dad599e09104800aabc10562ef3e3  | 0 | 0 | 2 | 0 |
| 87033414ff9e5e616b47c0d98a1517ae | 0 | 0 | 2 | 0 |
| 0df48faa2c01baf185d9f659c532c231 | 0 | 0 | 2 | 0 |
| 61b92783f7e07ad791593392a97b5b71 | 0 | 0 | 2 | 0 |
| ffef9757b2853fe80dd08c8097f9853a | 0 | 0 | 2 | 0 |
| 7500362dfbd67fe9110a2d10225e762c | 0 | 0 | 2 | 0 |
| 4bd175991312a786cef209a14fd2cdd4 | 0 | 0 | 2 | 0 |
| 578b27c4e69acaedf1af575f09744c2f | 0 | 0 | 2 | 0 |

|                                  |   |   |   |   |
|----------------------------------|---|---|---|---|
| 0451fa34fba0f607f952edca56973aa7 | 0 | 0 | 2 | 0 |
| 8f7a8455770cdabada400f7a313f8866 | 0 | 0 | 2 | 0 |
| ec3dd0d6bf15d1ebee20eebaad5c04bb | 0 | 0 | 2 | 0 |
| 099662ab91d0c7f9a7ec53151aa8b5a1 | 0 | 0 | 2 | 0 |
| 44ef8efad9fd04f3f499c4471d19e92d | 0 | 0 | 2 | 0 |
| b6209a9136541216dfed7086bedab53a | 0 | 0 | 2 | 0 |
| a4545c39751b974812c4ffc78da8d797 | 0 | 0 | 2 | 0 |
| fddc32a2184463839a8d60ea57901c41 | 0 | 0 | 2 | 0 |
| 0a276e8cec68002e4baa569677be7695 | 0 | 0 | 2 | 0 |
| cf6c21f36f6dcdde704f76cd4ffd1df9 | 0 | 0 | 2 | 0 |
| a6f0f42554d3a62b52b60f86028afc26 | 0 | 0 | 2 | 0 |
| 9f6c69902092fd547b44b3b771129039 | 0 | 0 | 2 | 0 |
| 650fe5bfefb0ac586532baed24895005 | 0 | 0 | 2 | 0 |
| 31562cdf1a1891af369d9c2410c59390 | 0 | 0 | 2 | 0 |
| bd80c232c41f680a90c29ffce58d159a | 0 | 0 | 2 | 0 |
| 8dc1fd2c18b630659213e79ca9b7ab83 | 0 | 0 | 2 | 0 |
| e96922680b600be038a75e225136132e | 0 | 0 | 2 | 0 |
| e1a0ec047e77a3211cfeda71bf424563 | 0 | 0 | 2 | 0 |
| fab0cc7ccc537d406211bd5deaab034b | 0 | 0 | 2 | 0 |
| 437c43c67cc6fa447408bf0d13cfd1c8 | 0 | 0 | 2 | 0 |
| 9ae795e6e8334155c84b84f986cfc0ec | 0 | 0 | 2 | 0 |
| 218e7c50a4845c17620eb1b54d8d073b | 0 | 0 | 2 | 0 |
| 8a1f793b8692e64d48df9ebc6bf4174d | 0 | 0 | 2 | 0 |
| 4a1a9023b7780b615f95180b5512ec38 | 0 | 0 | 2 | 0 |
| e432144e52654a64a5b4e10ba1840fe7 | 0 | 0 | 2 | 0 |
| bc8c28c27a91db4c82ff45ce6600da54 | 0 | 0 | 2 | 0 |
| 196afb4193b0c5d7bb304080a7336227 | 0 | 0 | 2 | 0 |
| 7c27c564a1ebbcdb6891f8f17d31a327 | 0 | 0 | 2 | 0 |
| 134cc50c3f0f0581ad016ceeaf138d9c | 0 | 0 | 2 | 0 |
| 2dc2851616ab40291726affdfaff0bf9 | 0 | 0 | 2 | 0 |
| 82cbd59861d14458eda30d5c2952fca3 | 0 | 0 | 2 | 0 |
| efee50c8be83aef2be15a2b80d4ddb37 | 0 | 0 | 2 | 0 |
| 61759b69f43c3419e8419b56a7228104 | 0 | 0 | 2 | 0 |
| c94246a0e1fcc26919af34e485fba607 | 0 | 0 | 2 | 0 |
| f22005e752c0dbd52a5b965213733873 | 0 | 0 | 2 | 0 |
| 7586913ee749bf052f06b89b96b0e6c9 | 0 | 0 | 2 | 0 |
| 623e89b8019678b34b4d588ccbe38a23 | 0 | 0 | 2 | 0 |
| 2f4df284e782d6451c828c27e1064c17 | 0 | 0 | 2 | 0 |
| d7e45e6414f8e7ff0a4e67051635ecd0 | 0 | 0 | 2 | 0 |
| 91c6c20b885862b5e998428916883b00 | 0 | 0 | 2 | 0 |
| 7a2cf16b94a58f11b540697d89bb83a6 | 0 | 0 | 2 | 0 |
| 4a08be6e9a9d6818907d364de990ddb3 | 0 | 0 | 2 | 0 |
| c119d7f0e107c6180b37d6958442806d | 0 | 0 | 2 | 0 |
| 79d5ae249bfbf0a46ac641897ae501d9 | 0 | 0 | 2 | 0 |

|                                   |   |   |   |   |
|-----------------------------------|---|---|---|---|
| d0e94b022a7175105e7910fd260eadf2  | 0 | 0 | 2 | 0 |
| 455d2cbc2826debc18c9b3f2cb7ebc11  | 0 | 0 | 2 | 0 |
| 9a8ed0b3b0afcfdc7368a764fba36d889 | 0 | 0 | 2 | 0 |
| 27dafd150a143d7a5f2cdc545d714821  | 0 | 0 | 2 | 0 |
| 9e95a21f2b4ac4393a842788a453a7d6  | 0 | 0 | 2 | 0 |
| 0365708505a89ec8998f8d1e6379d9ec  | 0 | 0 | 2 | 0 |
| 403a10c6c6537fec2fbef698eec2f7a3  | 0 | 0 | 2 | 0 |
| c5b93bf0f9d0ea339cf670ea59326ad9  | 0 | 0 | 2 | 0 |
| 9f095c4853fc8e997485a23fc468be0d  | 0 | 0 | 2 | 0 |
| fd2fe3ccc9f024da5a5e10dfc5fd9499  | 0 | 0 | 2 | 0 |
| 7c1313a8906c17ef45b92455894ba7e0  | 0 | 0 | 2 | 0 |
| 180e6ccc623e3e392ecd8a125a3c8127  | 0 | 0 | 2 | 0 |
| 63215ce2e8b4a48c7780b9b44bcc35de  | 0 | 0 | 2 | 0 |
| 68ec85c107ad9ea6e14c858d22281ce8  | 0 | 0 | 2 | 0 |
| 2f217d6464ccc51d57fea93325264acd  | 0 | 0 | 2 | 0 |
| 34d06c2572ae7dac6e771d745dcd898a  | 0 | 0 | 2 | 0 |
| 8f298d4e9a1b63262465e7ff38eafd3e  | 0 | 0 | 2 | 0 |
| ff7377a39eb98b7bc247521f69f12e30  | 0 | 0 | 2 | 0 |
| 45f740faf8af677fe61f57cd5635752a  | 0 | 0 | 2 | 0 |
| b1748fcb0b7b06596770132a48772134  | 0 | 0 | 2 | 0 |
| 280252c27d62fded240a3b3f655c7a19  | 0 | 0 | 2 | 0 |
| 690ace021c72e309bd3fe94c25f0bc31  | 0 | 0 | 2 | 0 |
| 01f12510cf1a738ed80e7c1c9a9a4a79  | 0 | 0 | 2 | 0 |
| 4a20c831373e4401b16438a0c5d112f4  | 0 | 0 | 2 | 0 |
| 7f0f9f43425a33539fe61e1c908a2e7c  | 0 | 0 | 2 | 0 |
| e71e8ed0ae8febf70d5b4dffff8888cf  | 0 | 0 | 2 | 0 |
| 53e56c2ba8f59f779c9434b31fdc4050  | 0 | 0 | 2 | 0 |
| 08180868b78cfff33fbea0b7ec5960b7  | 0 | 0 | 2 | 0 |
| e24f8fe1ee84b9e6cad46b78086651e4  | 0 | 0 | 2 | 0 |
| 4b2e625afdc9b7aa575bec5e8c419a4c  | 0 | 0 | 2 | 0 |
| c40733bc7034129b159ef8f5fa9c5d33  | 0 | 0 | 2 | 0 |
| 6bcc12007b919435800c10aba8813c2a  | 0 | 0 | 2 | 0 |
| 5533a29d2412c0f6cd36d85b2332b864  | 0 | 0 | 2 | 0 |
| 2a9a143979dd08f09e22c991fc0a8137  | 0 | 0 | 2 | 0 |
| 705ab26cd0464009da1aea3985588db0  | 0 | 0 | 2 | 0 |
| 926654f616f97982aee78aef32f611c4  | 0 | 0 | 2 | 0 |
| b0228f5c777ccb071dcd154fc2862331  | 0 | 0 | 2 | 0 |
| 76b74efed29575694e5ba1ac4226ce24  | 0 | 0 | 2 | 0 |
| 26e723c5c29d4ef635b020d4887f8778  | 0 | 0 | 2 | 0 |
| 3571d97c2b565e572af74c2015588da0  | 0 | 0 | 2 | 0 |
| b398d9d1107d1378b6408bd9597aa77f  | 0 | 0 | 2 | 0 |
| 765324ca05ef893a87975411b1792fdc  | 0 | 0 | 2 | 0 |
| 45a0cc69f1796c797687aac972684d66  | 0 | 0 | 2 | 0 |
| e82fd4e47df8c56cf34d96110254f28b  | 0 | 0 | 2 | 0 |

|                                  |   |   |   |   |
|----------------------------------|---|---|---|---|
| 205e52e467fdbf00e767beb757a4d47b | 0 | 0 | 2 | 0 |
| 02188796be0abc064ea8bba7c7253f01 | 0 | 0 | 2 | 0 |
| e69623a075069d87fca21ce32d708fb0 | 0 | 0 | 2 | 0 |
| 820f5bb51dee3f63c72e316f4969fd08 | 0 | 0 | 2 | 0 |
| bd4ece0a447055ed7bfa9375351312e6 | 0 | 0 | 2 | 0 |
| 612ea3e6b4ab4e94ac0daba4d8d0c165 | 0 | 0 | 2 | 0 |
| 1c3cd79bf023a7cd1a63c27c521ac1c6 | 0 | 0 | 2 | 0 |
| 5897aa79768678e9d109cff898e3eff3 | 0 | 0 | 2 | 0 |
| f87c91113f39d473964593ad9b04a353 | 0 | 0 | 2 | 0 |
| 9afa09056b30ff52236e15f377c38f24 | 0 | 0 | 2 | 0 |

Figure 5D

|                               | CON        | TGOL      | SCOP       | TGOH       |
|-------------------------------|------------|-----------|------------|------------|
|                               | -          | -         |            |            |
|                               | 0.2983173  | 1.2733712 | 0.6208749  |            |
| HT002                         | 5          | 7         | 2          | 0.9508137  |
|                               |            |           |            | -          |
|                               | 0.2428628  | 1.3861347 | 0.1437850  | 0.9994868  |
| Alloprevotella                | 5          | 3         | 1          | 8          |
|                               | -          | -         | -          |            |
|                               | 1.0168674  | 0.2463081 | 0.1125582  | 1.3757338  |
| Lachnospiraceae_NK4A136_group | 2          | 3         | 9          | 4          |
|                               | -          | -         |            |            |
|                               | 0.1381023  | 0.2389159 |            | 1.3828239  |
| Muribaculaceae_unclassified   | 3          | 8         | -1.0058056 | 2          |
|                               | -          | -         | -          |            |
|                               | 0.2999829  | 0.1226489 | 0.9730949  | 1.3957269  |
| Lachnospiraceae_unclassified  | 8          | 8         | 6          | 2          |
|                               | -          | -         |            | -          |
|                               | 0.0183285  | 0.9528598 | 1.3856271  | 0.4144387  |
| Lactobacillus                 | 9          | 2         | 9          | 8          |
|                               |            | -         |            |            |
|                               |            | 0.6401734 | 1.4729141  |            |
| Akkermansia                   | -0.6086897 | 2         | 2          | -0.224051  |
|                               | -          | -         |            |            |
|                               | 1.3703729  | 0.0991737 | 0.8621683  | 0.6073783  |
| Dubosiella                    | 2          | 3         | 2          | 3          |
|                               | -          |           |            |            |
|                               | 1.4977800  | 0.4670763 | 0.5758482  | 0.4548554  |
| Olsenella                     | 3          | 4         | 3          | 6          |
|                               | -          |           |            |            |
|                               | 1.4950427  | 0.6132231 | 0.4418561  | 0.4399634  |
| Parasutterella                | 1          | 1         | 5          | 5          |
|                               | 0.9476946  | 0.7769970 | -          |            |
| Paramuribaculum               | 6          | 8         | 0.9360668  | -0.7886249 |



|                                 |           |           |            |           |
|---------------------------------|-----------|-----------|------------|-----------|
|                                 |           |           | 4          |           |
|                                 |           |           | -          |           |
|                                 | 0.6872639 | 0.6250656 | 1.4548689  | 0.1425392 |
| Clostridium                     | 9         | 7         | 5          | 8         |
|                                 |           |           | -          |           |
|                                 | 1.4617363 | 0.1991479 | 0.5159633  | 0.7466249 |
| Clostridia_UCG-014_unclassified | 1         | 6         | 6          | 8         |
|                                 |           |           | -          |           |
|                                 | 1.1436515 |           | 1.1892096  | 0.3948030 |
| Firmicutes_unclassified         | 9         | -0.349245 | 3          | 4         |
|                                 |           |           | -          |           |
|                                 | 1.2756809 | 0.5242080 | 1.0142849  | 0.2628120 |
| Others                          | 5         | 5         | 1          | 2         |
|                                 |           |           | -          |           |
|                                 | 0.6027247 | 0.4374828 | 1.0200302  | 1.1852721 |
| Escherichia-Shigella            | 4         | 2         | 2          | 4         |
|                                 |           |           | -          |           |
|                                 | 1.1625779 | 0.5977016 | 0.4697661  | 1.0346424 |
| Eubacterium]_xylanophilum_group | 6         | 6         | 4          | 4         |
|                                 |           |           | -          |           |
|                                 | 0.6668470 | 1.4766683 | 0.5579798  | 0.2518415 |
| Bacteroides                     | 1         | 6         | 1          | 4         |
|                                 |           |           | -          |           |
|                                 | 1.1834369 | 1.2415895 | 0.1386161  | 0.1967686 |
| Muribaculum                     | 7         | 4         | 2          | 9         |
|                                 |           |           | -          |           |
|                                 | 1.3155987 | 1.0991687 | 0.0289109  | 0.2453408 |
| Candidatus_Saccharimonas        | 2         | 8         | 5          | 9         |
|                                 |           |           | -          |           |
|                                 | 1.1359145 | 1.1511265 | 0.4460636  | 0.4308516 |
| Alistipes                       | 1         | 5         | 6          | 2         |
|                                 |           |           | -          |           |
|                                 | 1.3142743 |           | 0.2279197  | 0.6454903 |
| Clostridiales_unclassified      | 8         | 0.8967038 | 4          | 2         |
|                                 |           |           | -          |           |
|                                 | 1.1759434 | 1.2417671 | 0.2239681  | 0.1581444 |
| Coriobacteriaceae_UCG-002       | 5         | 3         | 2          | 4         |
|                                 |           |           | -          |           |
|                                 | 0.4264808 | 0.9827853 | 1.1994311  | 0.6431266 |
| Allobaculum                     | 2         | 6         | 9          | 4         |
|                                 |           |           | -          |           |
|                                 | 0.8263784 | 0.7053518 |            | 1.0124202 |
| Desulfovibrio                   | 1         | 7         | -0.8913937 | 4         |
| Helicobacter                    | 0.1610960 | 1.0048537 | 0.2184604  | -         |

|                              |           |           |            |           |
|------------------------------|-----------|-----------|------------|-----------|
|                              | 8         | 9         | 5          | 1.3844103 |
|                              |           |           |            | 2         |
|                              |           |           |            | -         |
| Ligilactobacillus            | 0.7979673 | 0.2764380 | 0.3873666  | 1.4617719 |
|                              | 2         | 4         | 1          | 7         |
| Enterorhabdus                | 0.6837482 | 0.5063368 | 0.2903838  |           |
|                              | 9         | 7         | 4          | -1.480469 |
|                              | -         |           |            | -         |
| Bifidobacterium              | 0.6875064 | 1.2022086 | 0.4316953  | 0.9463975 |
|                              | 5         | 7         | 3          | 6         |
|                              |           |           |            | -         |
| Ruminococcaceae_unclassified | 0.0585673 | 1.3930534 |            | 0.7602365 |
|                              | 9         | 7         | -0.6913843 | 7         |
|                              |           |           | -          | -         |
| Rikenella                    | 0.1886322 | 1.3165032 | 0.5306211  | 0.9745144 |
|                              | 7         | 4         | 1          | 1         |

Figure 5E

C  
a  
n  
d  
i  
d  
a  
t  
u  
s

—

V

B                    S                    D C D e            A

H d    G            a    P A E                    e a e r    P c

y e    e            c    l c l F                    f m s r P a t

d l    m    S c            a i u u                    C e p u u r t i

r l N m    p h            n d s s D    y u r y l c o e n B

o o i a T i a M c o i o e C a n r l f o t s o a

g v t t e r r y t b m b i h n c i o o m e c b c F

e i r i n o i x o a i a n l o l b b b i o i a t i

n b o m e c b o m c c c o o b a a a a c b b c e r

e r s o r h a c y t r t c r a s c c c r a a t r m

d i p n i a c o c e o e o o c s t t t o c c e o i    M

e o i a c e t c e r b r c f t i e e e b t t r i c M e

n n r d u t e c t i i i c l e f r r r i e e i d u e d    S

t o o t o r o o o o o o e r i o o o o r r o o t a i    u

e t t t e t i t t t t t t x i e t t t t i i t t e n a S m

s a a a s a a a a a a a a i a d a a a a a a a a s s n D s





























|     |   |
|-----|---|
| Bac | . |
| ter | 0 |
| ial | 0 |
| p__ |   |
| Aci |   |
| dob |   |
| act |   |
| eri |   |
| ota |   |
| c_  |   |
| _Bl |   |
| ast |   |
| oca |   |
| tel |   |
| lia |   |
| o_  |   |
| _Bl |   |
| ast |   |
| oca |   |
| tel |   |
| lal |   |
| es  |   |
| f__ |   |
| Bla |   |
| sto |   |
| cat |   |
| ell |   |
| ace |   |
| ae  |   |
| g__ |   |
| Bla |   |
| sto |   |
| cat |   |
| ell |   |
| a s |   |
| __B |   |
| las |   |
| toc |   |
| ate |   |
| lla |   |
| _un |   |
| cla |   |
| ssi |   |
| fie |   |







































\_Vi  
cin  
ami  
bac  
ter  
ale  
s\_u  
ncl  
ass  
ifi  
ed|  
g\_\_  
Vic  
ina  
mib  
act  
era  
les  
\_un  
cla  
ssi  
fie  
d|s  
\_\_v  
ici  
nam  
iba  
cte  
ral  
es\_  
unc  
las  
sif  
ied  
d\_\_  
Bac  
ter  
ia|  
p\_\_  
Act

1 1 1 1  
ino 2 8 2 3 4 1 5 1 2 7 4 7 6 7 1 6 6 3 3 5 5 2 2 0 1 5 5 3 5 4 3 2 4 1  
bac . . . . .  
ter 7 5 6 3 2 8 0 5 0 8 8 2 5 6 6 1 7 3 8 9 8 6 0 5 5 2 2 3 5 5 0 8 4 3  
iot 8 1 6 4 0 0 9 1 7 5 3 0 0 4 3 7 8 9 2 4 9 2 9 6 0 5 7 5 5 9 0 9 9 8













ale  
 s\_u  
 ncl  
 ass  
 ifi  
 ed|  
 g\_\_  
 Mic  
 rot  
 ric  
 hal  
 es\_  
 unc  
 las  
 sif  
 ied  
 |s\_  
 \_Mi  
 cro  
 tri  
 cha  
 les  
 \_un  
 cla  
 ssi  
 fie  
 d  
 d\_\_  
 Bac  
 ter  
 ia|  
 p\_\_  
 Act  
 ino  
 bac  
 ter  
 iot  
 a|c  
 \_A  
 cti  
 nob 0 0 0 0 0 0 1 0 0 8 1 1 2 5 8 2 0 0 0 0 0 0 0 0 0 0 3 3 0 0 0 0 1 0 0  
 act . . . . .  
 eri 0 1 2 5 6 2 5 1 2 4 4 9 3 6 4 2 1 7 4 1 2 4 1 1 3 3 9 6 2 6 4 0 3 1  
 a 7 3 8 1 2 7 0 8 6 0 6 6 0 0 6 5 5 8 6 4 4 2 0 6 3 8 9 5 6 9 1 6 5 7



d\_\_  
 Bac  
 ter  
 ial  
 p\_\_  
 Act  
 ino  
 bac  
 ter  
 iot  
 a|c  
 \_\_A  
 cti  
 nob  
 act  
 eri  
 a|o  
 \_\_A  
 cti  
 nom            0 0            0    0 0    0            0 0 0 0 0 0 0 0  
 yce            . .            .    . .    .            . . . . . . . .  
 tal            0 0            0    0 0    0            0 0 0 0 0 0 0 0  
 es    0 0 0 0 0 0 0 3 0 0 0 0 0 0 0 3 0 0 1 1 0 3 0 0 0 0 3 2 4 7 7 5 2 3

d\_\_  
 Bac  
 ter  
 ial  
 p\_\_  
 Act  
 ino  
 bac  
 ter  
 iot  
 a|c  
 \_\_A  
 cti  
 nob  
 act  
 eri  
 a|o  
 \_\_A  
 cti  
 nom            0 0            0    0 0    0            0 0 0 0 0 0 0 0  
 yce            . .            .    . .    .            . . . . . . . .  
 nom            0 0            0    0 0    0            0 0 0 0 0 0 0 0  
 yce    0 0 0 0 0 0 0 3 0 0 0 0 0 0 0 3 0 0 1 1 0 3 0 0 0 0 3 2 4 7 7 5 2 3



```

d__
Bac
ter
ial
p__
Act
ino
bac
ter
iot
a|c
__A
cti
nob
act
eri
a|o
__A
cti
nom
yce
tal
es|
f__
Act
ino
myc
eta
cea
e|g
__A
cti
nom
yce
s|s
__A
cti
nom
yce
s_u
ncl          0  0          0  0  0          0 0 0 0 0 0 0 0
ass          .  .          .  .  .          . . . . . . . .
ifi          0  0          0  0  0          0 0 0 0 0 0 0 0
ed  0 0 0 0 0 0 0 3 0 0 0 0 0 0 0 3 0 0 1 0 0 3 0 0 0 0 0 3 2 4 7 7 5 2 3

```













ino  
myc  
eta  
cea  
e|g  
\_\_T  
rue  
per  
ell  
a|s  
\_\_T  
rue  
per  
ell  
a\_u  
ncl  
ass  
ifi  
ed  
d\_\_  
Bac  
ter  
ial  
p\_\_  
Act  
ino  
bac  
ter  
iot  
a|c  
\_\_A  
cti  
nob  
act  
eri  
a|o  
\_\_B  
ifi  
dob

|     |   |   |   |   |   |   |   |   |   |   |   |   |   |   |   |   |   |   |   |   |   |   |   |   |   |   |   |   |   |   |   |   |   |   |   |   |
|-----|---|---|---|---|---|---|---|---|---|---|---|---|---|---|---|---|---|---|---|---|---|---|---|---|---|---|---|---|---|---|---|---|---|---|---|---|
| act | 0 | 0 | 0 | 0 | 0 | 0 | 1 | 0 | 0 | 8 | 1 | 1 | 2 | 5 | 8 | 2 | 0 | 0 | 0 | 0 | 0 | 0 | 0 | 0 | 0 | 0 | 3 | 3 | 0 | 0 | 0 | 0 | 0 | 0 | 0 |   |
| eri | . | . | . | . | . | . | . | . | . | . | . | . | . | . | . | . | . | . | . | . | . | . | . | . | . | . | . | . | . | . | . | . | . | . | . | . |
| ale | 0 | 0 | 2 | 5 | 5 | 2 | 4 | 0 | 2 | 2 | 4 | 8 | 1 | 5 | 4 | 1 | 1 | 7 | 2 | 0 | 0 | 0 | 0 | 0 | 2 | 2 | 8 | 0 | 1 | 4 | 2 | 9 | 0 | 0 |   |   |
| s   | 2 | 4 | 3 | 1 | 4 | 4 | 4 | 7 | 5 | 9 | 2 | 4 | 3 | 8 | 2 | 8 | 1 | 2 | 5 | 3 | 4 | 7 | 4 | 6 | 3 | 9 | 1 | 5 | 0 | 6 | 8 | 4 | 8 | 6 |   |   |
| d__ | 0 | 0 | 0 | 0 | 0 | 0 | 1 | 0 | 0 | 8 | 1 | 1 | 2 | 5 | 8 | 2 | 0 | 0 | 0 | 0 | 0 | 0 | 0 | 0 | 0 | 0 | 3 | 3 | 0 | 0 | 0 | 0 | 0 | 0 |   |   |

Bac . . . . .  
ter 0 0 2 5 5 2 4 0 2 2 4 8 1 5 4 1 1 7 2 0 0 0 0 0 2 2 8 0 1 4 2 9 0 0  
ia| 2 4 3 1 4 4 4 7 5 9 2 4 3 8 2 8 1 2 5 3 4 7 4 6 3 9 1 5 0 6 8 4 8 6

p\_\_

Act

ino

bac

ter

iot

a|c

\_\_A

cti

nob

act

eri

a|o

\_\_B

ifi

dob

act

eri

ale

s|f

\_\_B

ifi

dob

act

eri

ace

ae

d\_\_

Bac

ter

ia|

p\_\_

Act

ino

bac

ter

iot

a|c 0 0 0 0 0 0 1 0 0 8 1 1 2 5 8 2 0 0 0 0 0 0 0 0 0 0 3 3 0 0 0 0 0 0 0

\_\_A

cti 0 0 2 5 5 2 4 0 2 2 4 8 1 5 4 1 1 7 2 0 0 0 0 0 2 2 8 0 1 4 2 9 0 0

nob 2 4 3 1 4 4 4 7 5 9 2 4 3 8 2 8 1 2 5 3 4 7 4 6 3 9 1 5 0 6 8 4 8 6

act  
eri  
a|o  
\_\_B  
ifi  
dob  
act  
eri  
ale  
s|f  
\_\_B  
ifi  
dob  
act  
eri  
ace  
ae|  
g\_\_  
Bif  
ido  
bac  
ter  
ium  
d\_\_  
Bac  
ter  
ial  
p\_\_  
Act  
ino  
bac  
ter  
iot  
a|c  
\_\_A  
cti  
nob  
act  
eri  
a|o

\_\_B 0 0 0 0 0 0 1 0 0 8 1 1 2 5 8 2 0 0 0 0 0 0 0 0 0 0 3 3 0 0 0 0 0 0 0  
ifi . . . . .  
dob 0 0 2 5 5 2 4 0 2 2 4 8 1 5 4 1 1 7 2 0 0 0 0 0 2 2 8 0 1 4 2 9 0 0  
act 2 4 3 1 4 4 4 7 5 9 2 4 3 8 2 8 1 2 5 3 4 7 4 6 3 9 1 5 0 6 8 4 8 6





```

ino
bac
ter
iot
a|c
__A
cti
nob
act
eri
a|o
__C
ory
neb
act
eri
ale
s|f
__C
ory
neb
act
eri
ace
ae|
g__
Cor
yne
bac
ter
ium
d__
Bac
ter
ia|
p__
Act
ino
bac
ter
iot          0          0 0 0 0          0 0 0 0 0          0 0 0
a|c          .          . . . .          . . . . .          . . .
__A          0          0 0 0 0          0 0 0 0 0          0 0 0
cti 0 0 0 0 0 0 0 0 0 0 0 0 0 3 0 0 0 0 0 1 0 1 1 0 0 0 1 5 2 2 2 0 3 5 4

```

















|     |   |
|-----|---|
| Bac | . |
| ter | 0 |
| ial | 1 |
| p__ |   |
| Act |   |
| ino |   |
| bac |   |
| ter |   |
| iot |   |
| a c |   |
| __A |   |
| cti |   |
| nob |   |
| act |   |
| eri |   |
| a o |   |
| __C |   |
| ory |   |
| neb |   |
| act |   |
| eri |   |
| ale |   |
| s f |   |
| __M |   |
| yco |   |
| bac |   |
| ter |   |
| iac |   |
| eae |   |
| lg_ |   |
| _My |   |
| cob |   |
| act |   |
| eri |   |
| um  |   |
| s__ |   |
| Myc |   |
| oba |   |
| cte |   |
| riu |   |
| m_u |   |
| ncl |   |
| ass |   |
| ifi |   |





















































































```

rdi
ops
is|
s__
Noc
ard
iop
sis
_un
cla
ssi
fie
d
d__
Bac
ter
ial|
p__
Act
ino
bac
ter
iot
a|c
__A
cti
nob
act
eri
a|o
__S
tre
pto
spo
ran
gia
les
|f_
_St
rep
tos      0 0 0 0  0  0 0 0      0 0 0 0 0 0 0 0 0 0 0 0 0 0 0 0
por      . . . . .  .  . . .      . . . . . . . . . . . . . . . .
ang      0 0 0 0  0  0 0 0      0 0 0 0 0 0 0 0 0 0 0 0 0 0 0 0
iac 0 0 0 0 3 3 2 2 0 1 0 2 1 1 0 0 0 0 0 3 2 3 2 2 1 2 4 2 3 2 2 2 1 1

```



p\_\_  
Act  
ino  
bac  
ter  
iot  
a|c  
\_\_A  
cti  
nob  
act  
eri  
a|o  
\_\_S  
tre  
pto  
spo  
ran  
gia  
les  
|f\_  
\_St  
rep  
tos  
por  
ang  
iac  
eae  
|g\_  
\_Th  
erm  
opo  
lys  
por  
a|s  
\_\_T  
her  
mop  
oly  
spo  
ra\_  
unc  
las  
sif



\_\_A

cti

nob

act

eri

a|o

\_\_S

tre

pto

spo

ran

gia

les

|f\_

\_Th

erm

omo

nos

por

ace

ae|

g\_\_

The

rmo

bis

por

a

d\_\_

Bac

ter

ia|

p\_\_

Act

ino

bac

ter

iot

a|c

\_\_A

cti

nob

act

eri

a|o

|                                                                         |     |   |   |   |
|-------------------------------------------------------------------------|-----|---|---|---|
| 0 0 0 0 0 0 0 0                                                         | 0 0 | 0 | 0 | 0 |
| . . . . .                                                               | . . | . | . | . |
| 0 0 0 0 0 0 0 0                                                         | 0 0 | 0 | 0 | 0 |
| 0 0 0 0 3 1 3 1 0 2 0 2 0 0 0 0 0 0 0 0 1 2 0 1 0 0 0 1 0 0 1 0 0 0 0 0 |     |   |   |   |







pto  
 spo  
 ran  
 gia  
 les  
 |f\_  
 \_Th  
 erm  
 omo  
 nos  
 por  
 ace  
 ae|  
 g\_\_  
 The  
 rmo  
 mon  
 osp  
 ora  
 |s\_  
 \_Th  
 erm  
 omo  
 nos  
 por  
 a\_u  
 ncl  
 ass  
 ifi  
 ed  
 d\_\_  
 Bac  
 ter  
 ial  
 p\_\_  
 Act  
 ino  
 bac  
 ter  
 iot  
 a|c            0            0            0            0            0 0 0            0    0    0 0    0    0 0  
 \_\_A            .            .            .            .            . . .            .    .    . .    .    .  
 cti            0            0            0            0            0 0 0            0    0    0 0    0    0 0  
 nob 0 0 0 0 2 0 0 0 0 2 0 0 1 0 0 0 0 0 7 1 6 0 0 3 0 1 0 1 0 0 1 0 1 1







cti  
nob  
act  
eri  
ota  
|o\_  
\_Ac  
tin  
oba  
cte  
rio  
ta\_  
unc  
las  
sif  
ied  
|f\_  
\_Ac  
tin  
oba  
cte  
rio  
ta\_  
unc  
las  
sif  
ied  
|g\_  
\_Ac  
tin  
oba  
cte  
rio  
ta\_  
unc  
las  
sif  
ied  
|s\_  
\_Ac  
tin  
oba  
cte  
rio





```

eri
ota
|o_
_Ac
tin
omy
cet
ale
s|f
__A
cti
nom
yce
tal
es_
unc
las
sif
ied
d__
Bac
ter
ial
p__
Act
ino
bac
ter
iot
a|c
__A
cti
nob
act
eri
ota
|o_
_Ac
tin
omy
cet          0          0
ale          .          .
s|f          0          0
__A 0 0 0 0 0 0 0 0 0 1 0 0 0 0 0 0 0 0 0 0 0 0 0 1 0 0 0 0 0 0 0 0

```











|     |   |
|-----|---|
| ter | 0 |
| ial | 1 |
| p__ |   |
| Act |   |
| ino |   |
| bac |   |
| ter |   |
| iot |   |
| a c |   |
| __A |   |
| cti |   |
| nob |   |
| act |   |
| eri |   |
| ota |   |
| o_  |   |
| _Co |   |
| ryn |   |
| eba |   |
| cte |   |
| ria |   |
| les |   |
| f_  |   |
| _Co |   |
| ryn |   |
| eba |   |
| cte |   |
| ria |   |
| cea |   |
| e g |   |
| __C |   |
| ory |   |
| neb |   |
| act |   |
| eri |   |
| um  |   |
| s__ |   |
| Cor |   |
| yne |   |
| bac |   |
| ter |   |
| ium |   |
| _ur |   |
| eal |   |









```

B4_
12E
CAS
O
d__
Bac
ter
ia|
p__
Act
ino
bac
ter
iot
a|c
__A
cti
nob
act
eri
ota
|o_
_Mi
cro
coc
cal
es|
f__
Mic
rob
act      0      0      0 0      0      0
eri      .      .      . .      .      .
ace      0      0      0 0      0      0
ae 0 0 0 0 2 0 0 0 0 0 0 0 1 0 0 0 0 0 0 1 3 0 0 1 0 0 0 0 0 0 0 0 0 0 0 0
d__
Bac
ter
ia|
p__
Act
ino      0      0
bac      .      .
ter      0      0
iot 0 0 0 0 2 0 0 0 0 0 0 0 1 0 0 0 0 0 0 0 0 0 0 0 0 0 0 0 0 0 0 0 0 0 0 0

```

























```

bac
ter
iot
a|c
__A
cti
nob
act
eri
ota
|o_
_Mi
cro
coc
cal
es|
f__
Mic
roc
occ
ace
ae|
g__
Rot
hia
|s_
_Ro
thi
a_a
ero
lat
a
d__
Bac
ter
ia|
p__
Act
ino
bac
ter          0          0
iot          .          .
a|c          0          0
__A 0 0 0 0 0 0 0 0 0 1 0 0 0 0 0 0 0 0 0 0 0 0 0 0 0 1 0 0 0 0 0 0 0 0 0 0

```









ia|  
p\_\_  
Act  
ino  
bac  
ter  
iot  
a|c  
\_\_A  
cti  
nob  
act  
eri  
ota  
|o\_  
\_Ps  
eud  
ono  
car  
dia  
les  
|f\_  
\_Ps  
eud  
ono  
car  
dia  
cea  
e|g  
\_\_L  
ech  
eva  
lie  
ria  
|s\_  
\_Le  
che  
val  
ier  
ia\_  
sp.

|     |   |   |   |   |   |   |   |   |   |   |   |   |   |   |   |   |   |   |   |   |   |   |   |   |   |   |   |   |   |   |   |   |   |   |   |   |   |
|-----|---|---|---|---|---|---|---|---|---|---|---|---|---|---|---|---|---|---|---|---|---|---|---|---|---|---|---|---|---|---|---|---|---|---|---|---|---|
| d__ | 2 | 8 | 2 | 2 | 3 | 1 | 3 | 1 | 1 | 9 | 3 | 5 | 4 | 2 | 3 | 3 | 6 | 2 | 1 | 5 | 1 | 2 | 1 | 0 | 1 | 1 | 1 | 1 | 2 | 5 | 3 | 2 | 1 | 4 | 1 |   |   |
| Bac | . | . | . | . | . | . | . | . | . | . | . | . | . | . | . | . | . | . | . | . | 3 | . | 5 | . | . | . | . | . | . | . | . | . | . | . | . | . | . |
| ter | 7 | 3 | 3 | 8 | 5 | 5 | 5 | 3 | 8 | 4 | 3 | 2 | 1 | 0 | 1 | 9 | 6 | 6 | . | 7 | . | 2 | 9 | 3 | 1 | 8 | 2 | 6 | 2 | 9 | 5 | 8 | 1 | 2 |   |   |   |

ia| 1 8 7 2 6 3 9 3 1 2 7 4 9 4 7 2 3 1 2 9 6 0 9 8 7 5 8 9 9 0 9 4 4 0  
p\_\_ 9 0

Act  
ino  
bac  
ter  
iot  
a|c  
\_\_C  
ori  
oba  
cte  
rii  
a

d\_\_  
Bac  
ter  
ia|

p\_\_  
Act  
ino  
bac  
ter  
iot  
a|c  
\_\_C  
ori  
oba  
cte  
rii  
a|o  
\_\_C

ori 1 1  
oba 2 8 2 2 3 1 3 1 1 8 3 4 4 1 3 3 6 2 3 5 5 1 1 0 1 1 1 1 2 5 3 2 1 3 1  
cte . . . . .  
ria 6 1 2 7 4 4 3 2 7 6 1 9 0 9 0 5 4 4 1 7 2 6 9 2 0 7 1 1 0 1 1 6 6 1  
les 4 3 7 8 2 6 9 8 3 0 7 1 8 7 6 2 1 7 2 0 6 3 1 5 4 2 9 4 7 9 2 2 8 1

d\_\_  
Bac  
ter

ia| 2 7 1 2 2 0 2 0 1 5 2 3 2 1 1 1 4 1 9 3 2 0 0 0 0 0 0 3 0 0 0 0 0  
p\_\_ . . . . .  
Act 1 0 8 5 3 9 4 9 5 3 0 1 7 3 8 8 4 5 0 2 0 1 3 0 2 8 6 2 6 0 0 3 0  
ino 8 7 2 8 5 8 5 2 2 7 5 7 1 0 3 3 9 8 7 7 7 5 7 5 4 9 7 0 6 0 3 2 8 6



```

les
|f_
_At
opo
bia
cea
e|g
__A
top
obi
ace
ae_
unc
las
sif
ied
d__
Bac
ter
ia|
p__
Act
ino
bac
ter
iot
a|c
__C
ori
oba
cte
rii
a|o
__C
ori
oba
cte
ria
les
|f_
_At      0          0 0  0 0 0          0 0  0
opo      .          . .  . . .          . .  .
bia      0          0 0  0 0 0          0 0  0
cea 0 0 1 0 0 0 0 0 0 0 0 0 0 1 1 0 1 2 1 0 0 0 0 0 0 0 0 0 0 1 1 0 1 0 0 0 0 0

```

























```

ori
oba
cte
rii
a|o
__C
ori
oba
cte
ria
les
|f_
_At
opo
bia
cea
e|g
__O
lse
nel
la|
s__
Ols
ene
lla
_sp
._o
ral
_t_
xon
_80
9
d__
Bac
ter
ia|
p__
Act
ino
bac
ter  0  0  0      0  0      0 0 0 0      0  0 0      0 0
iot  .  .  .      .  .      . . . .      .  . .      . .
a|c  0  0  0      0  0      1 0 0 0      0  0 0      0 0
__C  0 2 0 0 0 1 0 0 0 1 0 0 1 0 0 0 0 0 2 1 7 0 0 0 0 0 1 0 1 0 0 0 0 1

```

```

ori
oba
cte
rii
a|o
__C
ori
oba
cte
ria
les
|f_
_Co
rio
bac
ter
iac
eae
d__
Bac
ter
ia|
p__
Act
ino
bac
ter
iot
a|c
__C
ori
oba
cte
rii
a|o
__C
ori
oba
cte
ria
les           0           0           0  0 0   0 0
|f_           .           .           .  . .   . .
_Co           0           0           0  0 0   0 0
rio  0 0 0 0 0 0 0 0 0 0 0 0 0 0 1 0 0 0 0 0 0 0 1 0 0 0 0 0 0 0 1 0 1 0 0 0 0 1

```

















ial  
 es\_  
 Inc  
 ert  
 ae\_  
 Sed  
 is|  
 g\_\_  
 Cor  
 iob  
 act  
 eri  
 ale  
 s\_I  
 nce  
 rta  
 e\_S  
 edi  
 s\_u  
 ncl  
 ass  
 ifi  
 ed|  
 s\_\_  
 Cor  
 iob  
 act  
 eri  
 ale  
 s\_I  
 nce  
 rta  
 e\_S  
 edi  
 s\_u  
 ncl  
 ass  
 ifi  
 ed  
 d\_\_  
 Bac 0 0 00 0 00000000  
 ter . . . . .  
 ia| 0 0 00 0 12101110  
 p\_\_ 0000000000001002011002005041247400





```

cte
rii
a|o
__C
ori
oba
cte
ria
les
|f_
_Co
rio
bac
ter
ial
es_
unc
las
sif
ied
|g_
_Co
rio
bac
ter
ial
es_
unc
las
sif
ied
|s_
_Co
rio
bac
ter
ial
es_
unc
las
sif
ied
d__ 0 1 0 0 1 0 0 0 0 3 1 1 1 0 1 1 1 0 3 2 3 1 1 0 0 0 0 2 1 2 1 1 3 1
Bac . . . . .

```



a|o  
\_\_C  
ori  
oba  
cte  
ria  
les

|f\_  
\_Eg  
ger  
the  
lla  
cea  
elg

\_\_D  
NF0  
080  
9

d\_  
Bac  
ter  
ial

p\_  
Act  
ino  
bac  
ter  
iot

a|c  
\_\_C  
ori  
oba  
cte  
rii

a|o  
\_\_C  
ori  
oba  
cte  
ria  
les

|     |         |         |         |         |         |         |         |         |     |
|-----|---------|---------|---------|---------|---------|---------|---------|---------|-----|
| f_  | .       | .       | . . . . | .       | . .     | . . . . | . . . . |         |     |
| _Eg | 0       | 0       | 0 0 0 0 | 0       | 0 0     | 0 0 0   | 0 0 1 1 |         |     |
| ger | 0 0 0 0 | 1 0 0 0 | 0 0 0 0 | 2 1 1 6 | 0 0 2 0 | 0 1 1 0 | 3 8 2 0 | 3 5 0 2 | 0 0 |







rth  
 ell  
 ace  
 ae\_  
 unc  
 las  
 sif  
 ied  
 |s\_  
 \_Eg  
 ger  
 the  
 lla  
 cea  
 e\_u  
 ncl  
 ass  
 ifi  
 ed  
 d\_\_  
 Bac  
 ter  
 ial  
 p\_\_  
 Act  
 ino  
 bac  
 ter  
 iot  
 a|c  
 \_\_C  
 ori  
 oba  
 cte  
 rii  
 a|o  
 \_\_C  
 ori  
 oba  
 cte  
 ria 0 1 0 0 1 0 0 0 0 3 1 1 1 0 1 1 1 0 3 2 3 1 1 0 0 0 0 2 1 2 1 1 3 1  
 les . . . . .  
 |f\_ 4 0 4 1 0 4 9 3 2 0 1 6 3 6 2 5 9 8 9 3 0 4 5 2 6 5 3 0 6 3 7 4 2 0  
 \_Eg 6 3 0 9 3 7 4 5 1 8 3 7 3 6 1 9 1 7 0 9 8 5 1 0 0 5 5 9 4 6 8 1 3 3

ger  
the  
lla  
cea  
elg  
\_\_E  
nte  
ror  
hab  
dus  
d\_\_  
Bac  
ter  
ia|  
p\_\_  
Act  
ino  
bac  
ter  
iot  
a|c  
\_\_C  
ori  
oba  
cte  
rii  
a|o  
\_\_C  
ori  
oba  
cte  
ria  
les  
|f\_  
\_Eg  
ger  
the  
lla  
cea  
elg

\_\_E 0 1 0 0 1 0 0 0 0 3 1 1 1 0 1 1 1 0 3 2 3 1 1 0 0 0 0 2 1 2 1 1 3 1  
nte . . . . .  
ror 4 0 4 1 0 4 9 3 2 0 1 6 3 6 2 5 9 8 9 3 0 4 5 2 6 5 3 0 6 3 7 4 2 0  
hab 6 3 0 9 3 7 4 5 1 8 3 7 3 6 1 9 1 7 0 9 8 5 1 0 0 5 5 9 4 6 8 1 3 3

```

dus
|s_
_En
ter
orh
abd
us_
unc
las
sif
ied
d__
Bac
ter
ia|
p__
Act
ino
bac
ter
iot
a|c
__C
ori
oba
cte
rii
a|o
__C
ori
oba
cte
ria
les
|f_
_Eg
ger
the
lla
cea
e|g  0 0 0 0      0 0 0      0      0 0 0 0 0      0 0 0 0 0 0 0
__P   . . . .      . . .      .      . . . . . . .
arv  0 0 0 0      1 0 0      0      0 0 0 0 0      0 0 0 0 0 0 0
iba  0 1 6 1 3 0 0 0 0 4 0 7 1 0 0 3 0 0 0 1 5 0 2 0 3 0 0 5 2 3 2 2 6 1

```

```

cte
r
d__
Bac
ter
ia|
p__
Act
ino
bac
ter
iot
a|c
__C
ori
oba
cte
rii
a|o
__C
ori
oba
cte
ria
les
|f_
_Eg
ger
the
lla
cea
e|g
__P
arv
iba
cte
r|s
__P
arv
iba
cte    0 0 0 0      0 0 0      0      0 0 0 0 0      0 0 0 0 0 0 0
r_u    . . . .      . . .      .      . . . . . . .
ncl    0 0 0 0      1 0 0      0      0 0 0 0 0      0 0 0 0 0 0 0
ass    0 1 6 1 3 0 0 0 0 4 0 7 1 0 0 3 0 0 0 1 5 0 2 0 3 0 0 5 2 3 2 2 6 1

```



```

rth
ell
ale
s|f
__E
gge
rth
ell
ace
ae
d__
Bac
ter
ia|
p__
Act
ino
bac
ter
iot
a|c
__C
ori
oba
cte
rii
a|o
__E
gge
rth
ell
ale
s|f
__E
gge
rth
ell
ace
ae|
g__
Adl          0    0    0 0    0 0 0 0 0 0 0 0
erc          .    .    . .    . . . . . . . .
reu          0    0    0 0    0 0 0 0 0 0 0 0
tzi 0 0 0 0 0 0 0 0 0 0 0 0 0 0 2 0 0 1 0 0 3 1 0 5 4 5 4 2 8 7 2 0 0

```









|     |             |           |                                       |
|-----|-------------|-----------|---------------------------------------|
| Bac | . . . . .   | . . . . . | . . . . .                             |
| ter | 0 0 0 0 0 0 | 2 0 0 0   | 2 0 0 0 0 0 0 0 1 0 0 0 3 1 4 2 0 3 0 |
| ial | 5 3 1 5 1 7 | 0 4 5 1   | 0 5 3 6 1 5 7 2 1 3 6 1 6 1 2 6 7 6 4 |

p\_\_

Act

ino

bac

ter

iot

a|c

\_\_C

ori

oba

cte

rui

a|o

\_\_E

gge

rth

ell

ale

s|f

\_\_E

gge

rth

ell

ace

ae|

g\_\_

Egg

ert

hel

la

d\_\_

Bac

ter

ial

p\_\_

Act

ino

|     |             |         |                                         |
|-----|-------------|---------|-----------------------------------------|
| bac | 0 0 0 0 0 0 | 0 0 0 0 | 0 0 0 0 0 0 0 0 0 0 0 0 0 0 0 0 0 0 0 0 |
|-----|-------------|---------|-----------------------------------------|

|     |           |           |           |
|-----|-----------|-----------|-----------|
| ter | . . . . . | . . . . . | . . . . . |
|-----|-----------|-----------|-----------|

|     |             |         |                                       |
|-----|-------------|---------|---------------------------------------|
| iot | 0 0 0 0 0 0 | 2 0 0 0 | 2 0 0 0 0 0 0 0 1 0 0 0 3 1 4 2 0 3 0 |
|-----|-------------|---------|---------------------------------------|

|     |                                                                     |
|-----|---------------------------------------------------------------------|
| a c | 0 5 3 1 5 1 7 0 0 0 4 5 1 0 0 0 5 3 6 1 5 7 2 1 3 6 1 6 1 2 6 7 6 4 |
|-----|---------------------------------------------------------------------|





gge  
rth  
ell  
ace  
ae|  
g\_\_  
Ent  
ero  
rha  
bdu  
s|s  
\_\_E  
nte  
ror  
hab  
dus  
\_sp

.  
d\_\_  
Bac  
ter  
ia|

p\_\_ 8 6 3 7 2 2 2 2 6 4 1 5 2 5 2 5 1 4 2 1 1 5 4 4 1 5 1 3 4 1 3  
Bac 2 2 2 5 6 4 2 8 5 2 5 0 8 9 5 5 1 7 5 1 9 9 4 3 1 7 0 3 8 2 9 7 9 5  
ter . . . . .  
oid 6 3 8 3 1 9 9 3 4 8 0 4 3 4 2 9 8 9 5 7 8 2 9 1 3 3 5 1 1 9 7 1 1 0  
ota 5 2 2 4 2 8 7 5 6 2 6 7 7 3 3 4 9 1 4 2 0 7 4 9 6 3 5 2 6 3 4 0 4 7

d\_\_  
Bac  
ter  
ia|

p\_\_  
Bac  
ter  
oid  
ota

|c\_ 8 6 3 7 2 2 2 2 6 4 1 5 2 5 2 5 1 4 2 1 1 5 4 4 1 5 1 3 4 1 3  
\_Ba 2 2 2 5 6 4 2 8 5 2 5 0 8 9 5 5 1 7 5 1 9 9 4 3 1 7 0 3 8 2 9 7 9 5  
cte . . . . .  
roi 6 3 8 3 1 9 9 3 4 8 0 4 3 4 2 9 8 9 5 7 8 2 9 1 2 2 5 1 1 9 6 1 1 0  
dia 5 2 2 4 2 8 7 4 6 1 2 7 7 3 3 0 9 1 4 2 0 7 4 1 6 4 4 2 6 3 9 0 3 2  
d\_\_ 8 6 3 7 2 2 2 2 6 4 1 5 2 9 5 5 2 5 1 4 2 1 1 5 4 4 1 5 8 1 3 4 1 3  
Bac 2 2 2 5 6 4 2 8 5 2 5 0 8 . . 5 1 7 5 1 9 9 4 3 1 6 0 3 . 2 9 6 9 5  
ter . . . . . 4 2 . . . . . 1 . . . . .

ia| 6 3 8 3 0 9 9 3 4 8 0 4 3 3 3 9 8 9 5 7 8 2 9 1 0 9 5 1 4 9 5 9 1 0  
p\_\_ 5 2 2 3 9 8 7 3 6 1 2 6 7 0 9 1 4 2 0 6 4 1 6 9 1 0 2 4 8 3 0

Bac

ter

oid

ota

|c\_

\_Ba

cte

roi

dia

|o\_

\_Ba

cte

roi

dal

es

d\_\_

Bac

ter

ia|

p\_\_

Bac

ter

oid

ota

|c\_

\_Ba

cte

roi

dia

|o\_

\_Ba

cte

roi

dal

es|

f\_\_

Bac

ter 0 0 0 0 0 0 0 0 1 0 0 0 0 0 0 0 0 0 0 0 0 0 1 0 0 0 1 0 0 0 0 0 0 0 1 0

oid . . . . .

ace 3 1 6 0 2 0 0 1 8 3 1 4 4 0 0 3 3 5 1 7 0 0 5 9 0 7 2 6 2 2 3 4 1 5

ae 8 8 8 7 1 7 8 3 1 5 2 0 9 4 7 4 4 7 8 9 8 7 6 0 0 1 0 8 4 5 4 9 8 9

d\_\_ 0 0 0 0 0 0 0 0 1 0 0 0 0 0 0 0 0 0 0 0 0 1 0 0 0 1 0 0 0 0 0 0 0 1 0





|o\_  
 \_Ba  
 cte  
 roi  
 dal  
 es|  
 f\_\_  
 Bac  
 ter  
 oid  
 ace  
 ae|  
 g\_\_  
 Bac  
 ter  
 oid  
 es|  
 s\_\_  
 Bac  
 ter  
 oid  
 es\_  
 aci  
 dif  
 aci  
 ens  
 d\_\_  
 Bac  
 ter  
 ia|  
 p\_\_  
 Bac  
 ter  
 oid  
 ota  
 |c\_  
 \_Ba  
 cte  
 roi  
 dia

|     |   |   |   |   |   |   |   |   |   |   |   |   |   |   |   |   |   |   |   |
|-----|---|---|---|---|---|---|---|---|---|---|---|---|---|---|---|---|---|---|---|
| o_  | 0 | 0 | 0 | 0 | 0 | 0 | 0 | 0 | 0 | 0 | 0 | 0 | 0 | 0 | 0 | 0 | 0 | 0 | 0 |
| _Ba | . | . | . | . | . | . | . | . | . | . | . | . | . | . | . | . | . | . | . |
| cte | 0 | 0 | 0 | 0 | 0 | 0 | 0 | 0 | 0 | 0 | 0 | 0 | 0 | 1 | 1 | 0 | 0 | 0 | 0 |
| roi | 5 | 1 | 2 | 0 | 2 | 0 | 1 | 1 | 3 | 2 | 1 | 8 | 0 | 1 | 0 | 2 | 1 | 6 | 0 |
|     |   |   |   |   |   |   |   |   |   |   |   |   |   | 5 | 0 | 0 | 3 | 0 | 2 |
|     |   |   |   |   |   |   |   |   |   |   |   |   |   | 0 | 0 | 9 | 1 | 1 | 2 |
|     |   |   |   |   |   |   |   |   |   |   |   |   |   | 4 | 8 | 5 |   |   |   |

dal  
 es|  
 f\_\_  
 Bac  
 ter  
 oid  
 ace  
 ae|  
 g\_\_  
 Bac  
 ter  
 oid  
 es|  
 s\_\_  
 Bac  
 ter  
 oid  
 es\_  
 cae  
 cim  
 uri  
 s  
 d\_\_  
 Bac  
 ter  
 ia|  
 p\_\_  
 Bac  
 ter  
 oid  
 ota  
 |c\_  
 \_Ba  
 cte  
 roi  
 dia  
 |o\_  
 \_Ba  
 cte  
 roi

|     |   |   |   |   |   |   |   |   |   |   |   |   |   |   |   |   |   |   |   |   |   |   |   |   |   |   |   |   |   |   |   |   |   |   |
|-----|---|---|---|---|---|---|---|---|---|---|---|---|---|---|---|---|---|---|---|---|---|---|---|---|---|---|---|---|---|---|---|---|---|---|
| dal | 0 | 0 | 0 | 0 | 0 | 0 | 0 | 0 | 0 | 0 | 0 | 0 | 0 | 0 | 0 | 0 | 0 | 0 | 0 | 0 | 0 | 0 | 0 | 0 | 0 |   |   |   |   |   |   |   |   |   |
| es  | . | . | . | . | . | . | . | . | . | . | . | . | . | . | . | . | . | . | . | . | . | . | . | . | . |   |   |   |   |   |   |   |   |   |
| f__ | 0 | 0 | 0 | 0 | 0 | 0 | 0 | 0 | 0 | 0 | 0 | 0 | 0 | 0 | 0 | 0 | 0 | 0 | 0 | 0 | 0 | 0 | 0 | 0 | 0 |   |   |   |   |   |   |   |   |   |
| Bac | 1 | 1 | 3 | 0 | 2 | 0 | 1 | 0 | 2 | 0 | 0 | 0 | 0 | 0 | 0 | 2 | 0 | 2 | 1 | 0 | 0 | 0 | 3 | 2 | 4 | 2 | 1 | 0 | 2 | 2 | 4 | 3 | 2 | 3 |

















```

dia
|o_
_Ba
cte
roi
dal
es|
f__
Bac
ter
oid
ace
ae|
g__
Bac
ter
oid
es|
s__
Bac
ter
oid
es_
sp.
_SL
C1-
38
d__
Bac
ter
ia|
p__
Bac
ter
oid
ota
|c_
_Ba
cte
roi
dia    0  0 0      0 0  0  0      0      0 0 0
|o_    .  . .      . .  .  .      .      . . .
_Ba    0  0 0      0 0  0  0      0      0 3 0
cte    0 3 0 1 1 0 0 0 4 6 0 4 0 1 0 0 0 1 0 0 0 0 0 0 0 0 7 2 7 0 0 0 0 0 0 0

```









































rib  
 act  
 er|  
 s\_\_  
 Odo  
 rib  
 act  
 er\_  
 unc  
 las  
 sif  
 ied  
 d\_\_  
 Bac  
 ter  
 ia|  
 p\_\_  
 Bac  
 ter  
 oid  
 ota  
 |c\_  
 \_Ba  
 cte  
 roi  
 dia  
 |o\_  
 \_Ba  
 cte  
 roi  
 dal  
 es|  
 f\_\_

|     |   |   |   |   |   |   |   |   |   |   |   |   |   |   |   |   |   |   |   |   |   |   |   |   |   |   |   |   |   |   |   |   |   |   |   |   |
|-----|---|---|---|---|---|---|---|---|---|---|---|---|---|---|---|---|---|---|---|---|---|---|---|---|---|---|---|---|---|---|---|---|---|---|---|---|
| Mur | 7 | 5 | 2 | 7 | 2 | 2 | 2 | 2 | 4 | 3 | 1 | 3 | 2 |   | 5 | 2 | 5 | 1 | 3 | 2 | 1 | 1 | 4 | 2 | 3 | 4 | 1 | 3 | 4 | 1 | 2 |   |   |   |   |   |
| iba | 9 | 9 | 7 | 4 | 5 | 3 | 1 | 6 | 8 | 9 | 0 | 3 | 4 | 8 | 4 | 2 | 0 | 4 | 4 | 9 | 8 | 7 | 0 | 7 | 4 | 8 | 8 | 6 | 7 | 0 | 0 | 3 | 4 | 8 |   |   |
| cul | . | . | . | . | . | . | . | . | . | . | . | . | . | . | . | . | . | . | . | . | . | . | . | . | . | . | . | . | . | . | . | . | . | . | . |   |
| ace | 8 | 4 | 6 | 6 | 1 | 5 | 9 | 6 | 8 | 3 | 2 | 8 | 5 | 8 | 8 | 8 | 9 | 7 | 7 | 8 | 0 | 5 | 6 | 5 | 7 | 3 | 0 | 6 | 1 | 7 | 5 | 1 | 2 | 7 |   |   |
| ae  | 5 | 0 | 9 | 4 | 0 | 0 | 2 | 5 | 2 | 5 | 2 | 8 | 6 | 8 | 0 | 8 | 1 | 0 | 3 | 0 | 1 | 5 | 7 | 9 | 0 | 1 | 1 | 6 | 8 | 8 | 1 | 2 | 1 | 4 |   |   |
| d__ |   |   |   |   |   |   |   |   |   |   |   |   |   |   |   |   |   |   |   |   |   |   |   |   |   |   |   |   |   |   |   |   |   |   |   |   |
| Bac |   |   |   |   |   |   |   |   |   |   |   |   |   |   |   |   |   |   |   |   |   |   |   |   |   |   |   |   |   |   |   |   |   |   |   |   |
| ter | 0 | 0 | 0 | 0 | 0 | 0 | 0 | 0 | 0 | 0 | 0 | 0 | 0 | 0 | 0 | 0 | 0 | 0 | 0 | 0 | 0 | 0 | 0 | 0 | 0 | 0 | 0 | 1 | 0 | 0 | 0 | 0 | 0 | 0 | 0 |   |
| ia  | . | . | . | . | . | . | . | . | . | . | . | . | . | . | . | . | . | . | . | . | . | . | . | . | . | . | . | . | . | . | . | . | . | . | . | . |
| p__ | 3 | 1 | 4 | 4 | 1 | 0 | 2 | 0 | 5 | 3 | 0 | 1 | 0 | 0 | 0 | 2 | 1 | 3 |   | 0 | 1 | 0 | 1 | 4 | 1 | 2 | 0 | 5 | 1 | 1 | 2 | 3 | 2 | 4 |   |   |
| Bac | 3 | 6 | 6 | 7 | 5 | 9 | 2 | 7 | 0 | 3 | 3 | 1 | 8 | 6 | 2 | 2 | 9 | 0 | 0 | 9 | 5 | 3 | 8 | 4 | 7 | 9 | 5 | 6 | 5 | 8 | 6 | 3 | 2 | 2 |   |   |



es|  
 f\_\_  
 Mur  
 iba  
 cul  
 ace  
 ae|  
 g\_\_  
 Dun  
 can  
 iel  
 la|  
 s\_\_  
 Dun  
 can  
 iel  
 la\_  
 mur  
 is  
 d\_\_  
 Bac  
 ter  
 ia|  
 p\_\_  
 Bac  
 ter  
 oid  
 ota  
 |c\_  
 \_Ba  
 cte  
 roi  
 dia  
 |o\_  
 \_Ba  
 cte  
 roi  
 dal  
 es|

|     |   |   |   |   |   |   |   |   |   |   |   |   |   |   |   |   |   |   |   |   |   |   |   |   |   |   |   |   |   |   |   |   |   |   |
|-----|---|---|---|---|---|---|---|---|---|---|---|---|---|---|---|---|---|---|---|---|---|---|---|---|---|---|---|---|---|---|---|---|---|---|
| f__ | 7 | 5 | 2 | 6 | 2 | 1 | 1 | 2 | 4 | 3 | 3 | 2 | 4 | 1 | 4 | 1 | 3 | 2 | 1 | 4 | 2 | 3 | 3 | 2 | 3 | 1 | 2 |   |   |   |   |   |   |   |
| Mur | 3 | 6 | 5 | 8 | 2 | 9 | 9 | 4 | 2 | 1 | 9 | 0 | 3 | 8 | 4 | 8 | 9 | 9 | 2 | 5 | 4 | 1 | 9 | 4 | 2 | 5 | 7 | 8 | 6 | 9 | 5 | 8 | 1 | 0 |
| iba | . | . | . | . | . | . | . | . | . | . | . | . | . | . | . | . | . | . | . | . | . | . | . | . | . | . | . | . | . | . | . | . | . |   |
| cul | 0 | 5 | 3 | 4 | 5 | 6 | 6 | 0 | 4 | 7 | 0 | 9 | 3 | 0 | 4 | 4 | 2 | 0 | 8 | 8 | 0 | 4 | 7 | 8 | 5 | 6 | 2 | 4 | 4 | 6 | 9 | 9 | 3 | 6 |
| ace | 8 | 5 | 9 | 5 | 5 | 0 | 3 | 9 | 4 | 3 | 9 | 4 | 6 | 4 | 2 | 9 | 9 | 2 | 4 | 8 | 6 | 7 | 0 | 1 | 2 | 5 | 0 | 2 | 5 | 1 | 6 | 6 | 2 | 8 |





```

las
sif
ied
|s_
_Mu
rib
acu
lac
eae
_un
cla
ssi
fie
d
d__
Bac
ter
ia|
p__
Bac
ter
oid
ota
|c_
_Ba
cte
roi
dia
|o_
_Ba
cte
roi
dal
es|
f__
Mur
iba
cul
ace
ae|
g__ 4 1 1 3 1 3 2 1 5 3 0 2 1 0 0 2 1 4 0 2 2 4 0 1 1 2 0 4 0 0 2 2 2 6
Mur . . . . .
iba 5 9 4 8 0 2 0 7 6 6 5 1 0 3 2 8 1 0 7 8 9 3 7 7 4 1 6 9 4 6 6 7 2 7
cul 6 5 2 7 6 2 7 5 8 0 1 7 2 1 1 0 8 6 7 4 4 3 6 7 7 5 9 5 5 6 9 8 6 1

```





\_Ba  
cte  
roi  
dia  
|o\_  
\_Ba  
cte  
roi  
dal  
es|  
f\_\_  
Mur  
iba  
cul  
ace  
ae|  
g\_\_  
Mur  
iba  
cul  
um|  
s\_\_  
Mur  
iba  
cul  
um\_  
unc  
las  
sif  
ied  
d\_\_  
Bac  
ter  
ia|  
p\_\_  
Bac  
ter  
oid  
ota  
|c\_

|     |   |   |   |   |   |   |   |   |   |   |   |   |   |   |   |   |   |   |   |   |   |   |   |   |   |   |   |   |   |   |   |   |   |   |   |
|-----|---|---|---|---|---|---|---|---|---|---|---|---|---|---|---|---|---|---|---|---|---|---|---|---|---|---|---|---|---|---|---|---|---|---|---|
| _Ba | 1 | 0 | 0 | 1 | 1 | 0 | 0 | 0 | 0 | 3 | 0 | 0 | 0 | 0 | 0 | 1 | 0 | 1 | 1 | 0 | 0 | 1 | 0 | 0 | 0 | 0 | 0 | 1 | 0 | 0 | 1 | 1 | 0 | 0 |   |
| cte | . | . | . | . | . | . | . | . | . | . | . | . | . | . | . | . | . | . | . | . | . | . | . | . | . | . | . | . | . | . | . | . | . | . | . |
| roi | 8 | 7 | 4 | 8 | 3 | 5 | 0 | 7 | 1 | 6 | 5 | 6 | 1 | 4 | 1 | 3 | 2 | 3 | 1 | 9 | 8 | 7 | 0 | 5 | 5 | 2 | 0 | 7 | 1 | 3 | 6 | 0 | 4 | 9 |   |
| dia | 8 | 4 | 1 | 6 | 4 | 9 | 1 | 4 | 9 | 9 | 8 | 6 | 1 | 6 | 5 | 6 | 5 | 2 | 1 | 9 | 6 | 1 | 3 | 6 | 4 | 2 | 6 | 3 | 4 | 3 | 0 | 5 | 2 | 3 |   |

|o\_  
\_Ba  
cte  
roi  
dal  
es|  
f\_\_  
Mur  
iba  
cul  
ace  
ae|  
g\_\_  
Par  
amu  
rib  
acu  
lum  
d\_\_  
Bac  
ter  
ia|  
p\_\_  
Bac  
ter  
oid  
ota  
|c\_  
\_Ba  
cte  
roi  
dia  
|o\_  
\_Ba  
cte  
roi  
dal  
es|  
f\_\_  
Mur

|     |   |   |   |   |   |   |   |   |   |   |   |   |   |   |   |   |   |   |   |   |   |   |   |   |   |   |   |   |   |   |   |   |   |   |   |
|-----|---|---|---|---|---|---|---|---|---|---|---|---|---|---|---|---|---|---|---|---|---|---|---|---|---|---|---|---|---|---|---|---|---|---|---|
| iba | 1 | 0 | 0 | 1 | 1 | 0 | 0 | 0 | 0 | 3 | 0 | 0 | 0 | 0 | 0 | 1 | 0 | 1 | 1 | 0 | 0 | 1 | 0 | 0 | 0 | 0 | 0 | 1 | 0 | 0 | 1 | 1 | 0 | 0 |   |
| cul | . | . | . | . | . | . | . | . | . | . | . | . | . | . | . | . | . | . | . | . | . | . | . | . | . | . | . | . | . | . | . | . | . | . | . |
| ace | 8 | 7 | 4 | 8 | 3 | 5 | 0 | 7 | 1 | 6 | 5 | 6 | 1 | 4 | 1 | 3 | 2 | 3 | 1 | 9 | 8 | 7 | 0 | 5 | 5 | 2 | 0 | 7 | 1 | 3 | 6 | 0 | 4 | 9 |   |
| ae  | 8 | 4 | 1 | 6 | 4 | 9 | 1 | 4 | 9 | 9 | 8 | 6 | 1 | 6 | 5 | 6 | 5 | 2 | 1 | 9 | 6 | 1 | 3 | 6 | 4 | 2 | 6 | 3 | 4 | 3 | 0 | 5 | 2 | 3 |   |































































ae|  
g\_\_  
Pre  
vot  
ell  
a|s  
\_\_u  
ncu  
ltu  
red  
\_Pr  
evo  
tel  
la\_  
sp.  
d\_\_  
Bac  
ter  
ia|  
p\_\_  
Bac  
ter  
oid  
ota  
|c\_  
\_Ba  
cte  
roi  
dia  
|o\_  
\_Ba  
cte  
roi  
dal  
es|  
f\_\_

Rik 1  
ene 0 0 1 0 0 0 0 0 1 1 3 3 1 0 0 1 0 0 0 0 0 1 2 0 6 2 1 4 0 0 4 1 1 2  
lla . . . . .  
cea 4 6 8 1 2 3 3 2 9 1 3 9 3 2 1 3 3 7 2 7 4 3 1 9 5 7 7 2 2 6 7 5 5 7  
e 6 1 6 6 2 1 5 7 9 6 8 6 1 2 0 2 0 6 5 5 4 5 4 2 9 5 1 2 9 8 4 1 6 6  
d\_\_ 0 0 1 0 0 0 0 0 1 0 0 0 0 0 0 1 0 0 0 0 0 1 1 0 5 2 1 2 0 0 3 1 0 1  
Bac . . . . .  
ter 3 3 4 1 1 2 3 1 0 5 1 2 3 0 0 0 2 4 0 2 2 1 2 5 1 3 3 8 2 5 9 0 9 8

ia| 1 7 3 2 1 5 0 8 4 0 8 9 9 8 3 6 0 4 7 5 3 8 2 0 0 5 8 1 0 4 2 8 8 9

p\_\_

Bac

ter

oid

ota

|c\_

\_Ba

cte

roi

dia

|o\_

\_Ba

cte

roi

dal

es|

f\_\_

Rik

ene

lla

cea

e|g

\_\_A

lis

tip

es

d\_\_

Bac

ter

ia|

p\_\_

Bac

ter

oid

ota

|c\_

\_Ba

cte

roi

dia

0

0

0

|o\_

.

.

.

\_Ba

0

0

0

cte

0 0 0 0 0 0 0 0 0 0 0 0 0 0 0 0 1 0 0 0 0 0 0 0 0 0 0 0 1 0 0 0 0 0 0 0 0





















































ota  
|c\_  
\_Ba  
cte  
roi  
dia  
|o\_  
\_Ba  
cte  
roi  
dal  
es|  
f\_\_  
Tan  
ner  
ell  
ace  
ae|  
g\_\_  
Par  
aba  
cte  
roi  
des  
|s\_  
\_Pa  
rab  
act  
ero  
ide  
s\_g  
old  
ste  
ini  
i  
d\_\_  
Bac  
ter  
ia|  
p\_\_  
Bac 0 0                    0 0 0                    0                    0 0 0 0 0                    0  
ter . .                    . . .                    .                    . . . . .                    .  
oid 0 0                    0 0 0                    0                    0 1 1 1 0                    0  
ota 1 3 0 0 0 0 0 0 0 3 6 6 0 0 0 0 0 3 0 0 0 0 0 1 3 2 8 7 0 0 0 0 0 1 0

```

|c_
_Ba
cte
roi
dia
|o_
_Ba
cte
roi
dal
es|
f__
Tan
ner
ell
ace
ae|
g__
Par
aba
cte
roi
des
|s_
_Pa
rab
act
ero
ide
s_g
ord
oni
i
d__
Bac
ter
ia|
p__
Bac
ter
oid      0 0 0      0      0      0 0 0 0 0      0
ota      . . .      .      .      . . . . .      .
|c_      0 0 0      0      0      0 0 0 2 0      0
_Ba 0 0 0 2 1 1 0 0 0 0 0 1 0 0 0 1 0 0 0 0 0 0 0 0 8 9 1 6 0 0 0 0 0 0 0

```





```

cte
roi
dal
es|
f__
Tan
ner
ell
ace
ae|
g__
Par
aba
cte
roi
des
|s_
_un
cul
tur
ed_
Par
aba
cte
roi
des
_sp
.
d__
Bac
ter
ia|
p__
Bac
ter
oid
ota
|c_
_Ba
cte
roi 0 0 0 0          0    0 0 0          0
dia . . . .          .    . . .          .
|o_ 0 0 0 0          0    0 0 0          0
_Ba 1 1 4 1 0 0 0 0 0 0 0 0 2 0 0 1 0 4 0 0 0 0 0 0 1 0 0 0 0 0 0 0 0 0 0 0

```

```

cte
roi
dal
es|
f__
Tan
ner
ell
ace
ae|
g__
Tan
ner
ell
ace
ae_
unc
las
sif
ied
d__
Bac
ter
ia|
p__
Bac
ter
oid
ota
|c_
_Ba
cte
roi
dia
|o_
_Ba
cte
roi
dal
es|
f__ 0 0 0 0      0      0 0 0      0
Tan . . . .      .      . . .      .
ner 0 0 0 0      0      0 0 0      0
ell 1 1 4 1 0 0 0 0 0 0 0 0 2 0 0 1 0 4 0 0 0 0 0 0 1 0 0 0 0 0 0 0 0 0 0 0

```























|     |   |
|-----|---|
| Bac | . |
| ter | 0 |
| ia  | 0 |
| p__ |   |
| Bac |   |
| ter |   |
| oid |   |
| ota |   |
| c_  |   |
| _Ba |   |
| cte |   |
| roi |   |
| dia |   |
| o_  |   |
| _Ch |   |
| iti |   |
| nop |   |
| hag |   |
| ale |   |
| s f |   |
| _C  |   |
| hit |   |
| ino |   |
| pha |   |
| gal |   |
| es_ |   |
| unc |   |
| las |   |
| sif |   |
| ied |   |
| g_  |   |
| _Ch |   |
| iti |   |
| nop |   |
| hag |   |
| ale |   |
| s_u |   |
| ncl |   |
| ass |   |
| ifi |   |
| ed  |   |
| s__ |   |
| Chi |   |
| tin |   |





















































Sph  
ing  
oba  
cte  
riu  
m\_u  
ncl  
ass  
ifi  
ed

d\_\_  
Bac  
ter  
ia|

p\_\_  
Bac  
ter  
oid  
ota

|c\_  
\_Ba  
cte  
roi  
dot

a\_u  
ncl  
ass  
ifi

|            |   |       |            |          |      |       |
|------------|---|-------|------------|----------|------|-------|
|            | 0 | 00    | 0          | 00000    | 0    | 0000  |
|            | . | ..    | .          | .....    | .    | ..... |
|            | 0 | 00    | 0          | 00100    | 0    | 0000  |
| 0000000000 | 1 | 50000 | 3000000000 | 08091010 | 5005 |       |

d\_\_  
Bac  
ter  
ia|

p\_\_  
Bac  
ter  
oid  
ota

|c\_  
\_Ba  
cte  
roi  
dot

|            |   |       |            |          |      |       |
|------------|---|-------|------------|----------|------|-------|
|            | 0 | 00    | 0          | 00000    | 0    | 0000  |
|            | . | ..    | .          | .....    | .    | ..... |
|            | 0 | 00    | 0          | 00100    | 0    | 0000  |
| 0000000000 | 1 | 50000 | 3000000000 | 08091010 | 5005 |       |

a\_u





```

sif
ied
lg_
_Ba
cte
roi
dot
a_u
ncl
ass
ifi
ed
d__
Bac
ter
ia|
p__
Bac
ter
oid
ota
|c_
_Ba
cte
roi
dot
a_u
ncl
ass
ifi
ed|
o__
Bac
ter
oid
ota
_un
cla
ssi
fie
d|f          0  0 0          0          0 0 0 0 0  0  0 0 0 0
__B          .  . .          .          . . . . .  .  . . . .
act          0  0 0          0          0 0 1 0 0  0  0 0 0 0
ero 0 0 0 0 0 0 0 0 0 1 5 0 0 0 0 3 0 0 0 0 0 0 0 0 8 0 9 1 0 1 0 5 0 0 5

```

















ass

ifi

ed|

g\_\_

031

9-

6G2

0\_u

ncl

ass

ifi

ed|

s\_\_

031

9-

6G2

0\_u

ncl

ass

ifi

ed

d\_\_

Bac

ter

ia|

p\_\_

Cam

pyl

oba 0 0 0 0 0 0 0 0 0 2 8 0 4 0 0 0 0 0 0 0 0 0 1 0 0 2 0 0 0 0 1 0 1 0

cte . . . . .

rot 1 0 4 2 3 1 1 0 3 6 2 7 8 1 3 3 0 0 0 1 4 0 7 1 8 3 5 9 0 5 1 1 5 6

a 0 1 4 0 7 2 3 5 1 9 5 9 6 7 9 1 5 2 3 6 1 4 1 9 3 8 8 9 2 7 2 9 5 1

d\_\_

Bac

ter

ia|

p\_\_

Cam

pyl

oba

cte 0 0 0 0 0 0 0 0 0 2 8 0 4 0 0 0 0 0 0 0 0 0 1 0 0 2 0 0 0 0 1 0 1 0

rot . . . . .

a|c 1 0 4 2 3 1 1 0 3 6 2 7 8 1 3 3 0 0 0 1 4 0 7 1 8 3 5 9 0 5 1 1 5 6

\_\_C 0 1 4 0 7 2 3 5 1 9 5 9 6 7 9 1 5 2 3 6 1 4 1 9 3 8 8 9 2 7 2 9 5 1

amp

ylo

bac

ter

ia

d\_\_

Bac

ter

ia|

p\_\_

Cam

pyl

oba

cte

rot

a|c

\_\_C

amp

ylo

bac

ter

ia|

o\_\_

Cam

pyl

oba 0 0 0 0 0 0 0 0 0 2 8 0 4 0 0 0 0 0 0 0 0 0 1 0 0 2 0 0 0 0 1 0 1 0

cte . . . . .

ral 1 0 4 2 3 1 1 0 3 6 2 7 8 1 3 3 0 0 0 1 4 0 7 1 8 3 5 9 0 5 1 1 5 6

es 0 1 4 0 7 2 3 5 1 9 5 9 6 7 9 1 5 2 3 6 1 4 1 9 3 8 8 9 2 7 2 9 5 1

d\_\_

Bac

ter

ia|

p\_\_

Cam

pyl

oba

cte

rot

a|c

\_\_C 0 0 0 0 0 0 0 0 0 2 8 0 4 0 0 0 0 0 0 0 0 0 1 0 0 2 0 0 0 0 1 0 1 0

amp . . . . .

ylo 1 0 4 2 3 1 1 0 3 6 2 7 8 1 3 3 0 0 0 1 4 0 7 1 8 3 5 9 0 5 1 1 5 6

bac 0 1 4 0 7 2 3 5 1 9 5 9 6 7 9 1 5 2 3 6 1 4 1 9 3 8 8 9 2 7 2 9 5 1

ter  
ial  
o\_\_  
Cam  
pyl  
oba  
cte  
ral  
es|  
f\_\_  
Hel  
ico  
bac  
ter  
ace  
ae  
d\_\_  
Bac  
ter  
ial  
p\_\_  
Cam  
pyl  
oba  
cte  
rot  
al|c  
\_\_C  
amp  
ylo  
bac  
ter  
ial  
o\_\_  
Cam  
pyl  
oba  
cte  
ral  
es|

f\_\_ 0 0 0 0 0 0 0 0 0 2 8 0 4 0 0 0 0 0 0 0 0 0 1 0 0 2 0 0 0 0 1 0 1 0  
Hel . . . . .  
ico 1 0 4 2 3 1 1 0 3 6 2 7 8 1 3 3 0 0 0 1 4 0 7 1 8 3 5 9 0 5 1 1 5 6  
bac 0 1 4 0 7 2 3 5 1 9 5 9 6 7 9 1 5 2 3 6 1 4 1 9 3 8 8 9 2 7 2 9 5 1

ter  
ace  
ae|  
g\_\_  
Hel  
ico  
bac  
ter  
d\_\_  
Bac  
ter  
ial  
p\_\_  
Cam  
pyl  
oba  
cte  
rot  
a|c  
\_\_C  
amp  
ylo  
bac  
ter  
ial  
o\_\_  
Cam  
pyl  
oba  
cte  
ral  
es|  
f\_\_  
Hel  
ico  
bac  
ter  
ace  
ae|

g\_\_  
Hel 0 0 0 0 0 0 0 0 0 2 8 0 4 0 0 0 0 0 0 0 0 0 1 0 0 2 0 0 0 0 1 0 1 0  
ico . . . . .  
bac 1 0 4 2 3 1 1 0 3 6 2 7 8 1 3 3 0 0 0 1 4 0 7 1 8 3 5 9 0 5 1 1 5 6  
ter 0 1 4 0 7 2 3 5 1 9 5 9 6 7 9 1 5 2 3 6 1 4 1 9 3 8 8 9 2 7 2 9 5 1











rib  
act  
eri  
a\_u  
ncl  
ass  
ifi  
ed|  
o\_\_  
Can  
did  
atu  
s\_S  
acc  
har  
iba  
cte  
ria  
\_un  
cla  
ssi  
fie  
d|f  
\_\_C  
and  
ida  
tus  
\_Sa  
cch  
ari  
bac  
ter  
ia\_  
unc  
las  
sif  
ied  
lg\_  
\_Ca  
ndi  
dat  
us\_  
Sac  
cha



iba  
cte  
ria  
\_un  
cla  
ssi  
fie  
d|f  
\_\_C  
and  
ida  
tus  
\_Sa  
cch  
ari  
bac  
ter  
ia\_  
unc  
las  
sif  
ied  
lg\_  
\_Ca  
ndi  
dat  
us\_  
Sac  
cha  
rib  
act  
eri  
a\_u  
ncl  
ass  
ifi  
ed|  
s\_\_  
Can  
did  
atu  
s\_S  
acc  
har









```

es|
f__
Cal
dil
ine
ace
ae|
g__
Cal
dil
ine
ace
ae_
unc
las
sif
ied
|s_
_Ca
ldi
lin
eac
eae
_un
cla
ssi
fie
d
d__
Bac
ter
ia|
p__
Chl
oro
fle
xi|
c__
Ana
ero
lin      0    0    0             0 0 0 0 0    0 0 0 0    0  0
eae      .    .    .             . . . . .    . . . . .    .  .
|o_     0    0    0             0 0 0 0 0    0 0 0 0    0  0
_SB  0 0 0 0 0 1 0 0 1 0 1 0 0 0 0 0 0 0 0 0 0 0 3 2 1 1 2 0 2 1 1 1 1 0 0 1 0 1

```

```

R10
31
d__
Bac
ter
ia|
p__
Chl
oro
fle
xi|
c__
Ana
ero
lin
eae
|o_
_SB
R10          0          0
31|          .          .
f__          0          0
A4b 0 0 0 0 0 0 0 0 0 0 1 0 0 0 0 0 0 0 0 0 0 0 1 0 0 0 0 0 0 0 0 0 0 0
d__
Bac
ter
ia|
p__
Chl
oro
fle
xi|
c__
Ana
ero
lin
eae
|o_
_SB
R10
31|
f__          0          0
A4b          .          .
|g_          0          0
_A4 0 0 0 0 0 0 0 0 0 0 1 0 0 0 0 0 0 0 0 0 0 0 1 0 0 0 0 0 0 0 0 0 0 0 0

```

```

b_u
ncl
ass
ifi
ed
d__
Bac
ter
ia|
p__
Chl
oro
fle
xi|
c__
Ana
ero
lin
eae
|o_
_SB
R10
31|
f__
A4b
|g_
_A4
b_u
ncl
ass
ifi
ed|
s__
A4b
_un
cla          0          0
ssi          .          .
fie          0          0
d   0 0 0 0 0 0 0 0 0 0 1 0 0 0 0 0 0 0 0 0 1 0 0 0 0 0 0 0 0 0 0 0 0 0 0 0
d__
Bac          0    0    0          0 0 0 0 0    0 0 0 0 0    0 0
ter          .    .    .          . . . . .    . . . . .    . .
ia|          0    0    0          0 0 0 0 0    0 0 0 0 0    0 0
p__  0 0 0 0 1 0 0 1 0 1 0 0 0 0 0 0 0 0 0 0 2 2 1 1 2 0 2 1 1 1 0 0 1 0 1

```

```

Chl
oro
fle
xi|
c__
Ana
ero
lin
eae
|o_
_SB
R10
31|
f__
SBR
103
1_u
ncl
ass
ifi
ed
d__
Bac
ter
ia|
p__
Chl
oro
fle
xi|
c__
Ana
ero
lin
eae
|o_
_SB
R10
31|
f__
SBR          0    0    0          0 0 0 0 0    0 0 0 0    0    0
103          .    .    .          . . . . .    . . . . .    .    .
1_u          0    0    0          0 0 0 0 0    0 0 0 0    0    0
ncl 0 0 0 0 1 0 0 1 0 1 0 0 0 0 0 0 0 0 0 0 0 0 2 2 1 1 2 0 2 1 1 1 1 0 0 1 0 1

```

```

ass
ifi
ed|
g__
SBR
103
l_u
ncl
ass
ifi
ed
d__
Bac
ter
ia|
p__
Chl
oro
fle
xi|
c__
Ana
ero
lin
eae
|o_
_SB
R10
31|
f__
SBR
103
l_u
ncl
ass
ifi
ed|
g__
SBR
103
l_u          0    0    0          0 0 0 0 0    0 0 0 0    0  0
ncl          .    .    .          . . . . .    . . . . .    .  .
ass          0    0    0          0 0 0 0 0    0 0 0 0    0  0
ifi 0 0 0 0 1 0 0 1 0 1 0 0 0 0 0 0 0 0 0 0 0 0 2 2 1 1 2 0 2 1 1 1 0 0 1 0 1

```



|     |                                                                 |       |             |     |   |
|-----|-----------------------------------------------------------------|-------|-------------|-----|---|
| Bac | . . . . .                                                       | . . . | . . . . .   | . . | . |
| ter | 0 0 0 0 0 0                                                     | 0 0 0 | 0 0 0 0 0 0 | 0 0 | 0 |
| ia  | 2 2 1 2 2 3                                                     | 1 1 1 | 1 2 1 2 1 1 | 1 1 | 1 |
| p__ |                                                                 |       |             |     |   |
| Chl |                                                                 |       |             |     |   |
| oro |                                                                 |       |             |     |   |
| fle |                                                                 |       |             |     |   |
| xi  |                                                                 |       |             |     |   |
| c__ |                                                                 |       |             |     |   |
| Chl |                                                                 |       |             |     |   |
| oro |                                                                 |       |             |     |   |
| fle |                                                                 |       |             |     |   |
| xia |                                                                 |       |             |     |   |
| o_  |                                                                 |       |             |     |   |
| _Ch |                                                                 |       |             |     |   |
| lor |                                                                 |       |             |     |   |
| ofl |                                                                 |       |             |     |   |
| exa |                                                                 |       |             |     |   |
| les |                                                                 |       |             |     |   |
| f_  |                                                                 |       |             |     |   |
| _Ro |                                                                 |       |             |     |   |
| sei |                                                                 |       |             |     |   |
| fle |                                                                 |       |             |     |   |
| xac |                                                                 |       |             |     |   |
| eae |                                                                 |       |             |     |   |
| d__ |                                                                 |       |             |     |   |
| Bac |                                                                 |       |             |     |   |
| ter |                                                                 |       |             |     |   |
| ia  |                                                                 |       |             |     |   |
| p__ |                                                                 |       |             |     |   |
| Chl |                                                                 |       |             |     |   |
| oro |                                                                 |       |             |     |   |
| fle |                                                                 |       |             |     |   |
| xi  |                                                                 |       |             |     |   |
| c__ |                                                                 |       |             |     |   |
| Chl |                                                                 |       |             |     |   |
| oro |                                                                 |       |             |     |   |
| fle |                                                                 |       |             |     |   |
| xia |                                                                 |       |             |     |   |
| o_  |                                                                 |       |             |     |   |
| _Ch |                                                                 |       |             |     |   |
| lor |                                                                 |       |             |     |   |
| ofl |                                                                 |       |             |     |   |
| exa | 0 0 0 0 0 0 0 0 0 0 0 0 0 0 0 0 0 0 0 0 0 0 0 0 0 0 0 0 0 0 0 0 |       |             |     |   |







```

fie
d
d__
Bac
ter
ia|
p__
Chl
oro
fle
xi|
c__
Chl
oro
fle
xia
|o_
_Ch
lor
ofl
exa
les
|f_
_Ro
sei
fle
xac
eae
|g_
_Ro
sei
fle
xac
eae
_un
cla
ssi
fie
d|s
__R
ose      0 0 0 0 0 0 0 0 0 0 0 0 0 0 0 0 0 0 0 0
ifl      . . . . . . . . . . . . . . . . . .
exa      0 0 0 0 0 0 0 0 0 0 0 0 0 0 0 0 0 0 0 0
cea 0 0 0 0 2 2 1 2 2 3 0 1 1 1 0 0 0 0 1 2 1 2 1 1 0 1 1 0 0 1 0 0 0 0

```

































p\_\_  
 Cya  
 nob  
 act  
 eri  
 a|c  
 \_\_C  
 yan  
 oba  
 cte  
 rii  
 a|o  
 \_\_C  
 hlo  
 rop  
 las  
 t  
 d\_\_  
 Bac  
 ter  
 ia|  
 p\_\_  
 Cya  
 nob  
 act  
 eri  
 a|c  
 \_\_C  
 yan  
 oba  
 cte  
 rii  
 a|o  
 \_\_C  
 hlo  
 rop  
 las  
 t|f  
 \_\_C  
 hlo  
 rop  
 las  
 t\_u  
 ncl

|     |   |    |    |   |    |    |   |     |   |            |   |   |   |   |   |   |   |   |   |   |   |   |   |   |   |   |   |   |   |   |   |   |   |   |
|-----|---|----|----|---|----|----|---|-----|---|------------|---|---|---|---|---|---|---|---|---|---|---|---|---|---|---|---|---|---|---|---|---|---|---|---|
| rop | 0 | 00 | 00 | 0 | 00 | 00 | 0 | 000 | 0 | 0000000000 |   |   |   |   |   |   |   |   |   |   |   |   |   |   |   |   |   |   |   |   |   |   |   |   |
| las | . | .  | .  | . | .  | .  | . | .   | . | .          |   |   |   |   |   |   |   |   |   |   |   |   |   |   |   |   |   |   |   |   |   |   |   |   |
| t_u | 0 | 00 | 00 | 0 | 00 | 00 | 0 | 211 | 0 | 0000000001 |   |   |   |   |   |   |   |   |   |   |   |   |   |   |   |   |   |   |   |   |   |   |   |   |
| ncl | 0 | 2  | 0  | 2 | 1  | 0  | 4 | 1   | 0 | 3          | 0 | 2 | 2 | 0 | 2 | 1 | 0 | 2 | 0 | 1 | 6 | 1 | 0 | 2 | 0 | 0 | 1 | 8 | 6 | 1 | 1 | 3 | 5 | 0 |

```

ass
ifi
ed
d__
Bac
ter
ial
p__
Cya
nob
act
eri
a|c
__C
yan
oba
cte
rii
a|o
__C
hlo
rop
las
t|f
__C
hlo
rop
las
t_u
ncl
ass
ifi
ed|
g__
Chl
oro
pla
st_
unc    0  00  00  0  00  00  0  000  0  00000000000
las    .  .  .  .  .  .  .  .  .  .  .  .  .  .  .  .  .  .  .  .  .  .  .
sif    0  00  00  0  00  00  0  211  0  00000000001
ied    0 202104103022021020161020018611350
d__    0  00  00  0  00  00  0  000  0  00000000000
Bac    0 . 0 . . 0 . . 0 . 0 . . 0 . 0 . . . 0 . 0 . . . . . . . . . . .

```

|     |   |     |     |   |     |     |   |       |   |                     |
|-----|---|-----|-----|---|-----|-----|---|-------|---|---------------------|
| ter | 0 | 0 0 | 0 0 | 0 | 0 0 | 0 0 | 0 | 2 1 1 | 0 | 0 0 0 0 0 0 0 0 0 1 |
| ial | 2 | 2 1 | 4 1 | 3 | 2 2 | 2 1 | 2 | 1 6 1 | 2 | 0 1 8 6 1 1 3 5 0   |

p\_\_

Cya

nob

act

eri

a|c

\_\_C

yan

oba

cte

rii

a|o

\_\_C

hlo

rop

las

t|f

\_\_C

hlo

rop

las

t\_u

ncl

ass

ifi

ed|

g\_\_

Chl

oro

pla

st\_

unc

las

sif

ied

|s\_

\_Ch

lor

opl

ast

\_un

cla







Cya  
nob  
act  
eri  
a|c  
\_\_v  
amp  
iri  
vib  
rio  
nia  
|o\_  
\_Ga  
str  
ana  
ero  
phi  
lal  
es|  
f\_\_  
Gas  
tra  
nae  
rop  
hil  
ale  
s\_u  
ncl  
ass  
ifi  
ed|  
g\_\_  
Gas  
tra  
nae  
rop  
hil  
ale  
s\_u  
ncl  
ass  
ifi  
ed|  
s\_\_



Gas  
tra  
nae  
rop  
hil  
ale  
s\_u  
ncl  
ass  
ifi  
ed  
d\_\_  
Bac  
ter  
ia|  
p\_\_  
Def  
err

|     |                                             |               |           |
|-----|---------------------------------------------|---------------|-----------|
| iba | 0 0 3 0 0 0 0 0 0 0 1 0 5 0 1 0 0 0 0 0 0   | 0 0 0 0 0 0 0 | 0 0 0 0 0 |
| cte | . . . . .                                   | . . . . .     | . . . . . |
| rot | 0 0 6 0 3 0 0 0 1 2 3 4 9 0 5 0 0 0 0 1 1   | 4 0 3 0 0 1   | 0 1 0 0 2 |
| a   | 1 1 5 1 5 6 1 0 1 3 8 4 1 5 7 3 5 1 8 2 4 0 | 1 2 5 2 7 0 0 | 1 9 2 3 7 |

d\_\_  
Bac  
ter  
ia|  
p\_\_  
Def  
err

|     |                                             |               |           |
|-----|---------------------------------------------|---------------|-----------|
| iba | 0 0 3 0 0 0 0 0 0 0 1 0 5 0 1 0 0 0 0 0 0   | 0 0 0 0 0 0 0 | 0 0 0 0 0 |
| cte | . . . . .                                   | . . . . .     | . . . . . |
| rot | 0 0 6 0 3 0 0 0 1 2 3 4 9 0 5 0 0 0 0 1 1   | 4 0 3 0 0 1   | 0 1 0 0 2 |
| a c | 1 1 5 1 5 6 1 0 1 3 8 4 1 5 7 3 5 1 8 2 4 0 | 1 2 5 2 7 0 0 | 1 9 2 3 7 |

\_\_D  
efe

|     |                                             |               |           |
|-----|---------------------------------------------|---------------|-----------|
| rri | 0 0 3 0 0 0 0 0 0 0 1 0 5 0 1 0 0 0 0 0 0   | 0 0 0 0 0 0 0 | 0 0 0 0 0 |
| bac | . . . . .                                   | . . . . .     | . . . . . |
| ter | 0 0 6 0 3 0 0 0 1 2 3 4 9 0 5 0 0 0 0 1 1   | 4 0 3 0 0 1   | 0 1 0 0 2 |
| es  | 1 1 5 1 5 6 1 0 1 3 8 4 1 5 7 3 5 1 8 2 4 0 | 1 2 5 2 7 0 0 | 1 9 2 3 7 |

d\_\_  
Bac

|     |                                             |               |           |
|-----|---------------------------------------------|---------------|-----------|
| ter | 0 0 3 0 0 0 0 0 0 0 1 0 5 0 1 0 0 0 0 0 0   | 0 0 0 0 0 0 0 | 0 0 0 0 0 |
| ia  | . . . . .                                   | . . . . .     | . . . . . |
| p__ | 0 0 6 0 3 0 0 0 1 2 3 4 9 0 5 0 0 0 0 1 1   | 4 0 3 0 0 1   | 0 1 0 0 2 |
|     | 1 1 5 1 5 6 1 0 1 3 8 4 1 5 7 3 5 1 8 2 4 0 | 1 2 5 2 7 0 0 | 1 9 2 3 7 |

Def  
err  
iba  
cte  
rot  
a|c  
\_\_D  
efe  
rri  
bac  
ter  
es|  
o\_\_  
Def  
err  
iba  
cte  
ral  
es  
d\_\_  
Bac  
ter  
ial  
p\_\_  
Def  
err  
iba  
cte  
rot  
a|c  
\_\_D  
efe  
rri  
bac  
ter  
es|  
o\_\_  
Def  
err  
iba

|     |                                             |               |           |
|-----|---------------------------------------------|---------------|-----------|
| cte | 0 0 3 0 0 0 0 0 0 0 1 0 5 0 1 0 0 0 0 0 0   | 0 0 0 0 0 0   | 0 0 0 0 0 |
| ral | .                                           | .             | .         |
| es  | 0 0 6 0 3 0 0 0 1 2 3 4 9 0 5 0 0 0 0 1 1   | 4 0 3 0 0 1   | 0 1 0 0 2 |
| f__ | 1 1 5 1 5 6 1 0 1 3 8 4 1 5 7 3 5 1 8 2 4 0 | 1 2 5 2 7 0 0 | 1 9 2 3 7 |

```

Def
err
iba
cte
rac
eae
d__
Bac
ter
ial
p__
Def
err
iba
cte
rot
al|c
__D
efe
rri
bac
ter
es|
o__
Def
err
iba
cte
ral
es|
f__
Def
err
iba
cte
rac
eae
lg_
_Mu
cis  0 0 3 0 0 0 0 0 0 0 0 0 1 0 5 0 1 0 0 0 0 0 0 0 0 0 0 0 0 0 0 0 0 0 0 0 0 0 0 0 0 0 0
pir  . . . . . . . . . . . . . . . . . . . . . . . . . . . . . . . . . . . . . . . .
ill  0 0 6 0 3 0 0 0 0 1 2 3 4 9 0 5 0 0 0 0 0 1 1  4 0 3 0 0 1  0 1 0 0 2
um   1 1 5 1 5 6 1 0 1 3 8 4 1 5 7 3 5 1 8 2 4 0 1 2 5 2 7 0 0 1 9 2 3 7
d__  0 0 3 0 0 0 0 0 0 0 0 1 0 5 0 1 0 0 0 0 0 0 0 0 0 0 0 0 0 0 0 0 0 0 0 0 0 0 0 0 0 0 0

```

Bac . . . . .  
ter 0 0 6 0 3 0 0 0 1 2 3 4 9 0 5 0 0 0 0 1 1 4 0 3 0 0 1 0 1 0 0 2  
ia| 1 1 5 1 5 6 1 0 1 3 8 4 1 5 7 3 5 1 8 2 4 1 2 5 2 7 0 1 9 2 3 7

p\_\_

Def

err

iba

cte

rot

a|c

\_\_D

efe

rri

bac

ter

es|

o\_\_

Def

err

iba

cte

ral

es|

f\_\_

Def

err

iba

cte

rac

eae

lg\_

\_Mu

cis

pir

ill

um|

s\_\_

Muc

isp

iri

llu

m\_u

ncl

ass

```

ifi
ed
d__
Bac
ter
ia|
p__
Dei      0 0 0 0 0 0 0 0 0 0      0 0 0 0 0 0 0 0      0
noc      . . . . . . . . . .      . . . . . . . . . .
occ      0 0 0 0 0 0 0 0 0 0      0 0 0 0 0 0 0 0      0
ota 0 0 0 0 2 1 1 0 1 1 0 0 1 0 0 0 0 0 0 0 2 1 0 1 2 0 2 1 0 1 0 0 0 1 0

```

```

d__
Bac
ter
ia|
p__
Dei
noc
occ
ota

```

```

|c_
_De      0 0 0 0 0 0 0 0 0 0      0 0 0 0 0 0 0 0      0
ino      . . . . . . . . . .      . . . . . . . . . .
coc      0 0 0 0 0 0 0 0 0 0      0 0 0 0 0 0 0 0      0
ci  0 0 0 0 2 1 1 0 1 1 0 0 1 0 0 0 0 0 0 0 2 1 0 1 2 0 2 1 0 1 0 0 0 1 0

```

```

d__
Bac
ter
ia|
p__
Dei
noc
occ
ota

```

```

|c_
_De
ino
coc
ci|

```

```

o__
Dei      0 0 0 0 0 0 0 0 0 0      0 0 0 0 0 0 0 0      0
noc      . . . . . . . . . .      . . . . . . . . . .
occ      0 0 0 0 0 0 0 0 0 0      0 0 0 0 0 0 0 0      0
ale 0 0 0 0 2 1 1 0 1 1 0 0 1 0 0 0 0 0 0 0 2 1 0 1 2 0 2 1 0 1 0 0 0 1 0

```

```

s
d__
Bac
ter
ia|
p__
Dei
noc
occ
ota
|c_
_De
ino
coc
ci|
o__
Dei
noc
occ
ale
s|f
__T
rue      0 0 0 0 0 0 0 0 0 0      0 0      0 0 0 0 0 0 0 0      0
per      . . . . . . . . . .      . .      . . . . . . . .      .
ace      0 0 0 0 0 0 0 0 0 0      0 0      0 0 0 0 0 0 0 0      0
ae 0 0 0 0 0 2 1 1 0 1 1 0 0 1 0 0 0 0 0 0 0 0 2 1 0 1 2 0 2 1 0 1 0 0 0 1 0
d__
Bac
ter
ia|
p__
Dei
noc
occ
ota
|c_
_De
ino
coc
ci|
o__      0 0 0 0 0 0 0 0 0 0      0 0      0 0 0 0 0 0 0 0      0
Dei      . . . . . . . . . .      . .      . . . . . . . .      .
noc      0 0 0 0 0 0 0 0 0 0      0 0      0 0 0 0 0 0 0 0      0
occ 0 0 0 0 0 2 1 1 0 1 1 0 0 1 0 0 0 0 0 0 0 0 2 1 0 1 2 0 2 1 0 1 0 0 0 1 0

```

ale  
 s|f  
 \_\_T  
 rue  
 per  
 ace  
 ae|  
 g\_\_  
 Tru  
 epe  
 ra  
 d\_\_  
 Bac  
 ter  
 ia|  
 p\_\_  
 Dei  
 noc  
 occ  
 ota  
 |c\_  
 \_De  
 ino  
 coc  
 ci|  
 o\_\_  
 Dei  
 noc  
 occ  
 ale  
 s|f  
 \_\_T  
 rue  
 per  
 ace  
 ae|  
 g\_\_  
 Tru  
 epe  
 ra|

s\_\_            0 0 0 0 0 0    0 0            0 0    0 0    0 0    0            0  
 Tru            . . . . .    . .            . .    . .    . .    .            .  
 epe            0 0 0 0 0 0    0 0            0 0    0 0    0 0    0            0  
 ra\_ 0 0 0 0 2 1 1 0 1 1 0 0 1 0 0 0 0 0 0 2 1 0 1 2 0 2 1 0 1 0 0 0 1 0

unc  
las  
sif  
ied  
d\_\_  
Bac  
ter  
ia|  
p\_\_  
Dei  
noc  
occ  
ota  
|c\_  
\_De  
ino  
coc  
ci|  
o\_\_  
The  
rma  
les 0 0 0 0 0 0 0 0 0 0 0 0 0 0 0 0 0 0 0 0 0 0 0 0 0 0 0 0 0 0  
d\_\_  
Bac  
ter  
ia|  
p\_\_  
Dei  
noc  
occ  
ota  
|c\_  
\_De  
ino  
coc  
ci|  
o\_\_  
The  
rma  
les  
|f\_  
\_Th  
erm  
ace 0 0 0 0 0 0 0 0 0 0 0 0 0 0 0 0 0 0 0 0 0 0 0 0 0 0 0 0 0 0





The  
rma  
les  
|f\_  
\_Th  
erm  
ace  
ae|  
g\_  
Mei  
oth  
erm  
us|  
s\_  
Mei  
oth  
erm  
us\_  
unc  
las  
sif  
ied  
d\_  
Bac  
ter  
ia|

p\_  
Des  
ulf  
1  
oba  
cte  
rot  
a

```
0 0 4 0 0 1 0 0 0 0 3 0 1 0 7 0 5 0 3 1 1 0 0 0 1 0 0 0 1 0 1 0 1 0
. . . . .
1 1 6 5 3 0 2 4 6 7 9 4 0 2 3 2 6 1 9 1 1 2 5 7 2 9 5 8 5 6 5 6 2 1
9 5 2 0 0 8 9 3 6 1 7 3 4 7 2 2 0 9 9 5 3 4 8 4 9 3 0 1 9 6 9 7 6 4
```

d\_  
Bac  
ter  
ia|

p\_  
Des  
ulf  
1  
oba  
cte  
rot  
a|c

```
0 0 4 0 0 1 0 0 0 0 3 0 1 0 7 0 5 0 3 1 1 0 0 0 1 0 0 0 1 0 1 0 1 0
. . . . .
1 1 6 5 3 0 2 4 6 7 9 4 0 2 3 2 6 1 9 1 1 2 5 7 2 9 5 8 5 6 5 6 2 1
9 5 2 0 0 8 9 3 6 1 7 3 4 7 2 2 0 9 9 5 3 4 8 4 9 3 0 1 9 6 9 7 6 4
```

\_\_D  
esu  
lfo  
vib  
rio  
nia  
d\_\_

Bac  
ter  
ia|

p\_\_  
Des  
ulf  
oba  
cte  
rot  
a|c

\_\_D  
esu  
lfo  
vib  
rio  
nia

lo\_  
\_De  
sul

fov 1  
ibr 0 0 4 0 0 1 0 0 0 0 3 0 1 0 7 0 5 0 3 1 1 0 0 0 1 0 0 0 1 0 1 0 1 0  
ion . . . . .  
ale 1 1 6 5 3 0 2 4 6 7 9 4 0 2 3 2 6 1 9 1 1 2 5 7 2 9 5 8 5 6 5 6 2 1  
s 9 5 2 0 0 8 9 3 6 1 7 3 4 7 2 2 0 9 9 5 3 4 8 4 9 3 0 1 9 6 9 7 6 4

d\_\_  
Bac  
ter  
ia|

p\_\_  
Des  
ulf  
oba

cte 1  
rot 0 0 4 0 0 1 0 0 0 0 3 0 1 0 7 0 5 0 3 1 1 0 0 0 1 0 0 0 1 0 1 0 1 0  
a|c . . . . .  
\_\_D 1 1 6 5 3 0 2 4 6 7 9 4 0 2 3 2 6 1 9 1 1 2 5 7 2 9 5 8 5 6 5 6 2 1  
esu 9 5 2 0 0 8 9 3 6 1 7 3 4 7 2 2 0 9 9 5 3 4 8 4 9 3 0 1 9 6 9 7 6 4























```

imi
cro
biu
m_u
ncl
ass
ifi
ed
d__
Bac
ter
ia|
p__ 1 2 5 1 5 6 6 6 2 3 6 3 5 8 7 3 6 3 6 4 4 7 6 4 3 3 2 3 7 7 4 4 6 6
Fir 2 4 2 7 5 3 7 6 8 0 2 0 0 0 2 3 1 4 2 5 8 3 8 2 9 9 0 5 9 6 4 5 8 0
mic . . . . .
ute 0 9 8 2 3 4 2 7 0 1 2 4 9 5 8 9 9 0 8 4 4 0 7 2 9 4 2 1 4 8 1 6 0 3
s   8 6 7 6 2 0 0 5 1 6 1 7 7 8 0 8 9 2 4 2 0 0 2 0 3 7 1 1 0 3 2 2 7 5
d__
Bac
ter
ia|
p__
Fir
mic
ute   2   3   1   1  1 2 6 1   3 1   2 2 4 4 3   1 1 1 5 5 1 1 2 5
s|c  9 0 4 7 7 1 5 1 2 2 3 1 8 5 3 7 4 6 6 2 7 5 9 7 5 5 0 5 5 9 5 3 5 5
__B . . . . .
aci  6 3 6 4 1 7 7 0 0 7 3 2 7 6 4 1 9 6 1 9 9 7 3 4 1 6 6 4 2 3 8 0 5 1
lli  8 2 2 6 2 5 2 3 9 0 2 5 3 0 1 3 9 2 7 2 2 8 1 0 2 6 2 0 5 0 5 3 3 7
d__
Bac
ter
ia|
p__
Fir
mic
ute
s|c
__B
aci
lli           0           0  0 0  0 0 1 0  0  0 0 0  0
|o_           .           .  .  .  .  .  .  .  .  .  .  .  .  .
__Ac          0           0  0 0  0 0 5 0  0  0 2 1  0
hol  0 0 0 0 0 0 0 0 0 0 0 0 0 1 0 0 0 0 4 0 3 7 0 3 3 5 9 0 1 0 1 4 6 0 6

```

```

epl
asm
ata
les
d__
Bac
ter
ia|
p__
Fir
mic
ute
s|c
__B
aci
lli
|o_
_Ac
hol
epl
asm
ata
les
|f_
_Ac
hol
epl
asm                0          0  00  0010  0  000  0
ata                .          .  . .  . . . .  .  . . .  .
cea                0          0  00  0050  0  021  0
e  00000000000000000010000040370335901014606
d__
Bac
ter
ia|
p__
Fir
mic
ute
s|c
__B                0          0  00  0010  0  000  0
aci                .          .  . .  . . . .  .  . . .  .
lli                0          0  00  0050  0  021  0
|o_ 00000000000000000010000040370335901014606

```

\_Ac  
hol  
epl  
asm  
ata  
les  
|f\_  
\_Ac  
hol  
epl  
asm  
ata  
cea  
e|g  
\_\_A  
nae  
rop  
las  
ma  
d\_\_  
Bac  
ter  
ia|  
p\_\_  
Fir  
mic  
ute  
s|c  
\_\_B  
aci  
lli  
|o\_  
\_Ac  
hol  
epl  
asm  
ata  
les  
|f\_  
\_Ac  
hol  
epl  
asm  
ata

|     |                                                                             |   |     |         |   |         |   |
|-----|-----------------------------------------------------------------------------|---|-----|---------|---|---------|---|
| hol | 0                                                                           | 0 | 0 0 | 0 0 1 0 | 0 | 0 0 0   | 0 |
| epl | .                                                                           | . | . . | . . . . | . | . . . . | . |
| asm | 0                                                                           | 0 | 0 0 | 0 0 5 0 | 0 | 0 2 1   | 0 |
| ata | 0 0 0 0 0 0 0 0 0 0 0 0 0 0 0 0 1 0 0 0 0 4 0 3 7 0 3 3 5 9 0 1 0 1 4 6 0 6 |   |     |         |   |         |   |









s\_\_  
Ane  
uri  
nib  
aci  
llu  
s\_u  
ncl  
ass  
ifi  
ed

d\_\_  
Bac  
ter  
ia|

p\_\_  
Fir  
mic  
ute  
s|c

\_\_B  
aci  
lli

lo\_

|     |   |       |       |        |       |     |       |            |
|-----|---|-------|-------|--------|-------|-----|-------|------------|
| _Ba | 0 | 00    | 00000 | 000000 | 0     | 00  | 0     | 0000000000 |
| cil | . | ..    | ..... | .....  | .     | ..  | .     | .....      |
| lal | 0 | 00    | 00000 | 100000 | 0     | 00  | 0     | 0000000000 |
| es  | 0 | 30220 | 10510 | 43112  | 00301 | 200 | 10664 | 61344      |

d\_\_

Bac  
ter  
ia|

p\_\_  
Fir  
mic  
ute  
s|c

\_\_B  
aci  
lli

lo\_

|     |   |       |       |        |       |     |       |            |
|-----|---|-------|-------|--------|-------|-----|-------|------------|
| _Ba | 0 | 00    | 00000 | 000000 | 0     | 00  | 0     | 0000000000 |
| cil | . | ..    | ..... | .....  | .     | ..  | .     | .....      |
| lal | 0 | 00    | 00000 | 100000 | 0     | 00  | 0     | 0000000000 |
| es  | 0 | 20220 | 10410 | 41112  | 00301 | 200 | 10664 | 61343      |



lli  
|o\_  
\_Ba  
cil  
lal  
es|  
f\_\_  
Bac  
ill  
ace  
ae|  
g\_\_  
Aer  
iba  
cil  
lus  
|s\_  
\_Ae  
rib  
aci  
llu  
s\_s  
p.\_  
CCM  
MB1  
028  
d\_\_  
Bac  
ter  
ia|  
p\_\_  
Fir  
mic  
ute  
s|c  
\_\_B  
aci  
lli  
|o\_  
\_Ba  
cil  
lal  
es|  
f\_\_

0 0 0 0 0 0 0 0 0 0 0 0 0 0 0 0 1 0 0 3 0 0 0 0 0 0 0 0 0 0 0 0 0 0 2 0 0 0 0



aci  
llu  
s

d\_\_  
Bac  
ter  
ial

p\_\_  
Fir  
mic  
ute  
s|c

\_\_B  
aci  
lli  
|o\_  
\_Ba  
cil  
lal  
es|

f\_\_  
Bac  
ill  
ace  
ae|

g\_\_  
Ano  
xyb  
aci  
llu  
s|s

\_\_A  
nox  
yba  
cil  
lus

\_to  
ebi

|     |   |   |   |   |   |   |   |   |   |   |   |   |   |   |   |   |   |   |   |   |   |   |   |   |   |   |   |   |   |   |   |   |   |   |   |   |   |   |   |   |
|-----|---|---|---|---|---|---|---|---|---|---|---|---|---|---|---|---|---|---|---|---|---|---|---|---|---|---|---|---|---|---|---|---|---|---|---|---|---|---|---|---|
| i   | 0 | 0 | 0 | 0 | 0 | 0 | 0 | 0 | 0 | 0 | 0 | 0 | 0 | 0 | 0 | 0 | 0 | 0 | 0 | 0 | 0 | 0 | 0 | 0 | 0 | 0 | 0 | 0 | 0 | 0 | 0 | 0 | 0 | 0 | 0 | 0 |   |   |   |   |
| d__ |   |   |   |   |   |   |   |   |   |   |   |   |   |   |   |   |   |   |   |   |   |   |   |   |   |   |   |   |   |   |   |   |   |   |   |   |   |   |   |   |
| Bac |   | 0 | 0 |   | 0 |   |   |   |   |   |   |   |   |   |   |   |   |   |   |   |   |   |   | 0 | 0 |   |   |   |   |   |   |   |   |   |   | 0 |   |   |   |   |
| ter |   | . | . |   | . |   | . |   | . |   |   |   |   |   |   |   |   |   |   |   |   |   | . | . |   | . |   |   |   |   |   |   |   |   |   |   | . |   |   |   |
| ial |   | 0 | 0 |   | 0 |   |   |   |   |   |   |   |   |   |   |   |   |   |   |   |   |   | 0 | 0 |   |   |   |   |   |   |   |   |   |   |   | 0 |   |   |   |   |
| p__ | 0 | 0 | 0 | 1 | 0 | 0 | 1 | 0 | 0 | 0 | 0 | 0 | 0 | 5 | 0 | 0 | 0 | 0 | 0 | 0 | 0 | 0 | 0 | 0 | 0 | 0 | 0 | 0 | 0 | 0 | 0 | 0 | 0 | 1 | 1 | 0 | 0 | 1 | 0 | 0 |





```

Bac
ill
ace
ae|
g__
Bac
ill
ace
ae_
unc
las
sif
ied
|s_
_Ba
cil
lac
eae
_un
cla
ssi
fie
d
d__
Bac
ter
ial
p__
Fir
mic
ute
s|c
__B
aci
lli
|o_
_Ba
cil
lal
es|
f__      0      0  0  0      0 0      0  0 0 0 0 0 0 0
Bac      .      .  .  .      . .      .  . . . . . . . .
ill      0      0  0  0      0 0      0  0 0 0 0 0 0 0
ace 0 0 0 0 0 0 0 0 0 0 0 0 6 0 1 0 0 0 0 0 0 0 1 1 0 0 1 0 1 1 2 2 1 2 2 2

```





















|o\_  
\_Ba  
cil  
lal  
es|  
f\_\_  
Bac  
ill  
ace  
ae|  
g\_\_  
Bac  
ill  
us|  
s\_\_  
Bac  
ill  
us\_  
the  
rmo  
lac  
tis  
d\_\_  
Bac  
ter  
ia|  
p\_\_  
Fir  
mic  
ute  
s|c  
\_\_B  
aci  
lli  
|o\_  
\_Ba  
cil  
lal  
es|  
f\_\_  
Bac  
ill  
ace  
ae| 0 0 0 0 0 0 0 0 0 0 0 0 0 0 0 0 0 0 0 0 0 0 0 0 0 0 0 0 0 0











ute  
s|c  
\_\_B  
aci  
lli  
|o\_  
\_Ba  
cil  
lal  
es|  
f\_\_  
Bac  
ill  
ace  
ae|  
g\_\_  
Cer  
asi  
bac  
ill  
us|  
s\_\_  
Cer  
asi  
bac  
ill  
us\_  
qui  
squ  
ili  
aru  
m  
d\_\_  
Bac  
ter  
ia|  
p\_\_  
Fir  
mic  
ute  
s|c  
\_\_B  
aci  
lli

0  
. 0  
0  
0 0 0 0 0 0 0 0 0 0 0 0 0 0 0 0 0 0 0 0 0 0 0 0 0 0 0 0 2 0

|o\_  
 \_Ba  
 cil  
 lal  
 es|  
 f\_\_  
 Bac  
 ill  
 ace  
 ae|  
 g\_\_  
 Lys  
 ini  
 bac  
 ill  
 us  
 d\_\_  
 Bac  
 ter  
 ia|  
 p\_\_  
 Fir  
 mic  
 ute  
 s|c  
 \_\_B  
 aci  
 lli  
 |o\_  
 \_Ba  
 cil  
 lal  
 es|  
 f\_\_  
 Bac  
 ill  
 ace  
 ae|  
 g\_\_  
 Lys  
 ini  
 bac  
 ill  
 us|

0 0 0 0 0 0 0 0 0 0 0 0 0 0 0 0 0 0 0 0 0 0 0 0 0 0 0 0 0 0 0 0 0 0 0 0 0 0 0 0 0 0 0 0 0 0 0 0 0 0 0 0 0 0 0 0 2 0

0  
 .  
 0

```

s__
Lys
ini
bac
ill
us_
sph
aer
icu
s
d__
Bac
ter
ia|
p__
Fir
mic
ute
s|c
__B
aci
lli
|o_
_Ba
cil
lal
es|
f__
Bac
ill
ace
ae|
g__
Oce
ano   0  0 0    0 0    0 0 0 0 0
bac   .  . .    . .    . . . . .
ill   0  0 0    0 0    0 0 0 0 0
us    0 2 0 1 1 0 0 0 4 0 0 3 1 1 1 0 0 0 0 0 0 0 0 0 0 0 0 0 0 0 0 0 0 0 0 0 0 0 0
d__
Bac
ter   0  0 0    0 0    0 0 0 0 0
ia|   .  . .    . .    . . . . .
p__   0  0 0    0 0    0 0 0 0 0
Fir   0 2 0 1 1 0 0 0 4 0 0 3 1 1 1 0 0 0 0 0 0 0 0 0 0 0 0 0 0 0 0 0 0 0 0 0 0 0 0

```























```

ass
ifi
ed|
s__
Mar
ino
coc
cac
eae
_un
cla
ssi
fie
d
d__
Bac
ter
ia|
p__
Fir
mic
ute
s|c
__B
aci
lli
|o_
_Ba
cil
lal
es|
f__
Pla
noc 0 0 0 0 0 0
occ . . . . .
ace 0 0 0 0 0
ae 0 1 0 0 0 0 0 1 0 0 0 2 0 0 0 0 0 1 0 0 0 0 0 0 0 0 0 0
d__
Bac
ter
ia| 0
p__
Fir 0
mic 0 0 0 0 0 0 0 0 0 0 0 0 0 0 0 0 0 0 0 0 0 0 0 0 0 0 0 0

```



































lo\_  
\_Er  
ysi  
pel  
otr  
ich  
ale  
s|f  
\_\_E  
rys  
ipe  
lat  
ocl  
ost  
rid  
iac  
eae  
lg\_  
\_Er  
ysi  
pel  
ato  
clo  
str  
idi  
ace  
ae\_  
unc  
las  
sif  
ied  
|s\_  
\_Er  
ysi  
pel  
ato  
clo  
str  
idi  
ace  
ae\_  
unc  
las  
sif

```

ied
d__
Bac
ter
ia|
p__
Fir
mic
ute
s|c
__B
aci
lli
|o_
_Er
ysi
pel
otr
ich
ale
s|f
__E
rys
ipe
lat
ocl
ost
rid
iac
eae
|g_
_Er
ysi
pel
ato
clo 0 0      0 0      0 0 0 0 0      0 0 0 0 0 0 0 0 0 0 0 0 0 0
str  . .      . .      . . . . .      . . . . .      . . . . .      . .
idi 0 1      0 0      0 1 0 0 1      1 0 4 0 4 9 0      0 0 0 0 0      0 3
um  3 3 0 0 1 3 0 1 9 7 2 5 0 0 0 8 6 9 6 0 6 1 0 6 0 1 1 0 0 2 0 0 4 0
d__
Bac 0 0      0 0      0 0 0 0 0      0 0 0 0 0 0 0 0 0 0 0 0 0 0
ter  . .      . .      . . . . .      . . . . .      . . . . .      . .
ia| 0 1      0 0      0 1 0 0 1      1 0 4 0 4 9 0      0 0 0 0 0      0 3
p__ 3 3 0 0 1 3 0 1 9 7 2 5 0 0 0 8 6 9 6 0 6 1 0 6 0 1 1 0 0 2 0 0 4 0

```

Fir  
mic  
ute  
s|c  
\_\_B  
aci  
lli  
|o\_  
\_Er  
ysi  
pel  
otr  
ich  
ale  
s|f  
\_\_E  
rys  
ipe  
lat  
ocl  
ost  
rid  
iac  
eae  
|g\_  
\_Er  
ysi  
pel  
ato  
clo  
str  
idi  
um|  
s\_\_  
Ery  
sip  
ela  
toc  
los  
tri  
diu  
m\_u  
ncl  
ass



```

ifi
ed
d__
Bac
ter
ia|
p__
Fir
mic
ute
s|c
__B
aci
lli
|o_
_Er
ysi
pel
otr
ich
ale
s|f
__E
rys
ipe
lat
ocl
ost
rid
iac
eae
lg_
_Er
ysi
pel
otr
ich
ace
ae_          0          0    0 0 0 0 0 0 0
UCG          .          .    . . . . . . .
-           0          0    0 0 0 0 0 0 0
003  0 0 0 0 0 0 0 0 0 0 0 0 0 0 1 0 0 0 0 0 1 0 0 1 1 1 1 1 0 1 0 0 0 0 0 0
d__          0          0    0 0 0 0 0 0 0
Bac  0 0 0 0 0 0 0 0 0 0 0 0 0 . 0 0 0 0 0 0 . 0 0 . . . . . 0 . . 0 0 0 0 0 0

```

|     |   |   |           |     |
|-----|---|---|-----------|-----|
| ter | 0 | 0 | 0 0 0 0 0 | 0 0 |
| ia  | 1 | 1 | 1 1 1 1 1 | 1 0 |
| p__ |   |   |           |     |
| Fir |   |   |           |     |
| mic |   |   |           |     |
| ute |   |   |           |     |
| s c |   |   |           |     |
| __B |   |   |           |     |
| aci |   |   |           |     |
| lli |   |   |           |     |
| lo_ |   |   |           |     |
| _Er |   |   |           |     |
| ysi |   |   |           |     |
| pel |   |   |           |     |
| otr |   |   |           |     |
| ich |   |   |           |     |
| ale |   |   |           |     |
| s f |   |   |           |     |
| __E |   |   |           |     |
| rys |   |   |           |     |
| ipe |   |   |           |     |
| lat |   |   |           |     |
| ocl |   |   |           |     |
| ost |   |   |           |     |
| rid |   |   |           |     |
| iac |   |   |           |     |
| eae |   |   |           |     |
| lg_ |   |   |           |     |
| _Er |   |   |           |     |
| ysi |   |   |           |     |
| pel |   |   |           |     |
| otr |   |   |           |     |
| ich |   |   |           |     |
| ace |   |   |           |     |
| ae_ |   |   |           |     |
| UCG |   |   |           |     |
| -   |   |   |           |     |
| 003 |   |   |           |     |
| ls_ |   |   |           |     |
| _Er |   |   |           |     |
| ysi |   |   |           |     |
| pel |   |   |           |     |
| otr |   |   |           |     |
| ich |   |   |           |     |

```

ace
ae_
UCG
-
003
_un
cla
ssi
fie
d
d__
Bac
ter
ia|
p__
Fir
mic
ute
s|c
__B
aci
lli
|o_
_Er
ysi
pel
otr
ich
ale
s|f
__E
rys
ipe 1 1 1 3 1 1
lot 4 8 1 2 1 0 4 0 1 9 2 7 1 1 3 3 3 3 4 0 1 0 0 3 1 2 8 3 0 2 4 4 0 0
ric . . . . .
hac 3 5 7 3 5 8 3 4 3 6 5 0 1 7 0 6 3 0 4 4 4 6 1 4 7 6 2 9 5 4 5 9 1 0
eae 4 5 8 1 8 1 0 4 1 7 6 1 4 0 4 5 2 5 8 6 3 8 7 6 9 9 5 7 9 0 3 5 4 9
d__
Bac
ter 3
ia| 1 5 0 1 8 0 0 0 0 4 2 3 0 0 0 0 3 9 3 0 0 0 0 0 0 0 0 0 0 0 0 0 0 0 0 0 0 0
p__ . . . . .
Fir 4 9 9 2 0 0 8 0 2 3 0 9 2 1 2 4 0 5 2 0 0 0 0 0 1 0 0 0 0 0 0 8 4 0
mic 6 4 6 8 9 3 3 5 6 0 3 2 1 1 5 0 5 6 5 1 1 3 4 3 7 8 6 1 2 1 6 0 0 1

```

```

ute
s|c
__B
aci
lli
|o_
_Er
ysi
pel
otr
ich
ale
s|f
__E
rys
ipe
lot
ric
hac
eae
|g_
_Al
lob
acu
lum
d__
Bac
ter
ia|
p__
Fir
mic
ute
s|c
__B
aci
lli
|o_
_Er
ysi
pel 1 5 0 1 8 0 0 0 0 4 2 3 0 0 0 0 3 9 3 0 0 0 0 0 0 0 0 0 0 0 0 0 0 0 0 0 0 0 0 0
otr . . . . .
ich 4 9 9 2 0 0 8 0 2 3 0 9 2 1 2 4 0 5 2 0 0 0 0 0 1 0 0 0 0 0 0 8 4 0
ale 6 4 6 8 9 3 3 5 6 0 3 2 1 1 5 0 5 6 5 1 1 3 4 3 7 8 6 1 2 1 6 0 0 1

```

3











```

ten
isp
hae
ra|
s__
Cat
eni
sph
aer
a_u
ncl
ass
ifi
ed
d__
Bac
ter
ia|
p__
Fir
mic
ute
s|c
__B
aci
lli
|o_
_Er
ysi
pel
otr
ich
ale
s|f
__E
rys
ipe
lot
ric
hac      1          1          1
eae 2 2 0 1 3 0 2 0 0 5 0 2 0 1 2 3 0 3 1 0 1 0 0 3 1 0 7 0 0 1 2 2 0 0
|g_ . . . . .
_Du 8 5 7 0 3 5 8 2 8 3 5 9 8 5 6 2 2 4 0 3 3 2 0 2 1 7 9 5 3 8 1 4 0 0
bos 7 8 2 0 7 7 0 3 1 0 3 6 6 3 6 0 6 5 4 7 1 5 5 4 9 4 2 8 1 4 6 9 3 4

```





```

lo_
_Er
ysi
pel
otr
ich
ale
s|f
__E
rys
ipe
lot
ric
hac
eae
lg_
_Er
ysi
pel
oth
rix
|s_
_Er
ysi
pel
oth
rix
_un
cla
ssi
fie
d
d__
Bac
ter
ia|
p__
Fir
mic
ute
s|c    0 0  0    0  0  0  0 0 0  0 0 0 0 0 0 0 0 0 0 0 0 0 0 0
__B    . .  .    .  .  .  . . .  . . . . . . . . . . . . . . . .
aci    0 0  0    0  0  0  0 0 0  0 0 0 1 0 0 0 0 0 0 0 1 0 0 0 0 0 0
lli    0 1 7 0 3 0 0 1 0 1 0 7 0 1 2 4 0 0 3 7 2 8 2 1 7 4 2 0 4 7 7 8 8 3

```

lo\_  
\_Er  
ysi  
pel  
otr  
ich  
ale  
s|f  
\_\_E  
rys  
ipe  
lot  
ric  
hac  
eae  
lg\_  
\_Er  
ysi  
pel  
otr  
ich  
ace  
ae\_  
unc  
las  
sif  
ied  
d\_\_  
Bac  
ter  
ia|  
p\_\_  
Fir  
mic  
ute  
s|c  
\_\_B  
aci  
lli

lo\_  
\_Er    0 0    0    0    0    0    0 0 0    0 0 0 0 0 0 0 0 0 0 0 0 0 0 0 0  
ysi    . .    .    .    .    . . .    . . . . . . . . . . . . . . .  
pel    0 0    0    0    0    0    0 0 0    0 0 0 1 0 0 0 0 0 0 1 0 0 0 0 0  
otr    0 1 7 0 3 0 0 1 0 1 0 7 0 1 2 4 0 0 3 7 2 8 2 1 7 4 2 0 4 7 7 8 8 3

ich  
 ale  
 s|f  
 \_\_E  
 rys  
 ipe  
 lot  
 ric  
 hac  
 eae  
 lg\_  
 \_Er  
 ysi  
 pel  
 otr  
 ich  
 ace  
 ae\_  
 unc  
 las  
 sif  
 ied  
 |s\_  
 \_Er  
 ysi  
 pel  
 otr  
 ich  
 ace  
 ae\_  
 unc  
 las  
 sif  
 ied  
 d\_  
 Bac  
 ter  
 ia|  
 p\_  
 Fir  
 mic    0 0 0 0 0 0 0 0 0    0    0 0    0 0 0 0 0 0  
 ute    . . . . . . . . .    .    . .    . . . . .  
 s|c    0 0 0 0 0 6 0 2 0    0    0 0    0 0 0 1 0 0  
 \_\_B    0 1 2 3 8 7 5 4 3 3 0 0 0 1 0 0 0 0 6 0 1 0 0 0 0 0 1 5 3 5 5 1 0 0

```

aci
lli
|o_
_Er
ysi
pel
otr
ich
ale
s|f
__E
rys
ipe
lot
ric
hac
eae
|g_
_Fa
eca
lib
acu
lum
d__
Bac
ter
ial
p__
Fir
mic
ute
s|c
__B
aci
lli
|o_
_Er
ysi
pel
otr
ich    0 0 0 0 0 0 0 0 0 0      0      0  0      0 0 0 0 0 0
ale    . . . . . . . . . .      .      .  .      . . . . . .
s|f    0 0 0 0 0 6 0 2 0      0      0  0      0 0 0 1 0 0
__E    0 1 2 3 8 7 5 4 3 3 0 0 0 1 0 0 0 0 6 0 1 0 0 0 0 0 1 5 3 5 5 1 0 0

```







a|s  
\_\_H  
old  
ema  
nel  
la\_  
unc  
las  
sif  
ied  
d\_\_  
Bac  
ter  
ia|  
p\_\_  
Fir  
mic  
ute  
s|c  
\_\_B  
aci  
lli  
|o\_  
\_Er  
ysi  
pel  
otr  
ich  
ale  
s|f  
\_\_E  
rys  
ipe  
lot  
ric  
hac  
eae  
|g\_  
\_I1  
eib  
act  
eri  
um  
d\_\_

|                                                                     |             |           |     |           |       |
|---------------------------------------------------------------------|-------------|-----------|-----|-----------|-------|
| 0 0 0                                                               | 0 0 0 0 0 0 | 0 0 0 0 0 | 0 0 | 0 0 0 0   | 0 0 0 |
| . . .                                                               | . . . . .   | . . . . . | . . | . . . . . | . . . |
| 0 0 0                                                               | 0 0 0 0 0 0 | 0 0 0 0 0 | 0 1 | 0 0 0 0   | 0 0 0 |
| 1 1 1 0 2 3 2 2 1 1 0 2 7 5 9 1 0 4 1 0 0 0 0 0 1 3 2 1 0 3 3 2 0 0 |             |           |     |           |       |
| 0 0 0 0 0 0 0 0 0 0 0 0 0 0 0 0 0 0 0 0 0 0 0 0 0 0 0 0 0 0 0 0     |             |           |     |           |       |

|     |                                                                     |             |           |       |           |       |
|-----|---------------------------------------------------------------------|-------------|-----------|-------|-----------|-------|
| Bac | . . .                                                               | . . . . .   | . . . . . | . . . | . . . . . | . . . |
| ter | 0 0 0                                                               | 0 0 0 0 0 0 | 0 0 0 0 0 | 0 1   | 0 0 0 0   | 0 0 0 |
| ia  | 1 1 1                                                               | 2 3 2 2 1 1 | 2 7 5 9 1 | 4 1   | 1 3 2 1   | 3 3 2 |
| p__ |                                                                     |             |           |       |           |       |
| Fir |                                                                     |             |           |       |           |       |
| mic |                                                                     |             |           |       |           |       |
| ute |                                                                     |             |           |       |           |       |
| s c |                                                                     |             |           |       |           |       |
| _B  |                                                                     |             |           |       |           |       |
| aci |                                                                     |             |           |       |           |       |
| lli |                                                                     |             |           |       |           |       |
| lo_ |                                                                     |             |           |       |           |       |
| _Er |                                                                     |             |           |       |           |       |
| ysi |                                                                     |             |           |       |           |       |
| pel |                                                                     |             |           |       |           |       |
| otr |                                                                     |             |           |       |           |       |
| ich |                                                                     |             |           |       |           |       |
| ale |                                                                     |             |           |       |           |       |
| s f |                                                                     |             |           |       |           |       |
| _E  |                                                                     |             |           |       |           |       |
| rys |                                                                     |             |           |       |           |       |
| ipe |                                                                     |             |           |       |           |       |
| lot |                                                                     |             |           |       |           |       |
| ric |                                                                     |             |           |       |           |       |
| hac |                                                                     |             |           |       |           |       |
| eae |                                                                     |             |           |       |           |       |
| lg_ |                                                                     |             |           |       |           |       |
| _Il |                                                                     |             |           |       |           |       |
| eib |                                                                     |             |           |       |           |       |
| act |                                                                     |             |           |       |           |       |
| eri |                                                                     |             |           |       |           |       |
| um  |                                                                     |             |           |       |           |       |
| s__ |                                                                     |             |           |       |           |       |
| Ile |                                                                     |             |           |       |           |       |
| iba |                                                                     |             |           |       |           |       |
| cte |                                                                     |             |           |       |           |       |
| riu |                                                                     |             |           |       |           |       |
| m_u |                                                                     |             |           |       |           |       |
| ncl |                                                                     |             |           |       |           |       |
| ass |                                                                     |             |           |       |           |       |
| ifi |                                                                     |             |           |       |           |       |
| ed  |                                                                     |             |           |       |           |       |
| d__ |                                                                     |             |           |       |           |       |
| Bac | 0 0 0 0 0 0 0 0 0 0 0 0 0 0 0 0 0 0 0 0 0 0 0 0 0 0 0 0 0 0 0 0 0 0 |             |           |       |           |       |



\_Er  
ysi  
pel  
otr  
ich  
ale  
s|f  
\_\_E  
rys  
ipe  
lot  
ric  
hac  
eae  
lg\_  
\_So  
lob  
act  
eri  
um|  
s\_\_  
Sol  
oba  
cte  
riu  
m\_u  
ncl  
ass  
ifi  
ed  
d\_\_  
Bac  
ter  
ia|  
p\_\_  
Fir  
mic  
ute  
s|c  
\_\_B  
aci  
lli  
|o\_  
\_Er

0 0 0 0 0 0 00 0000103001100  
.  
0 1 1 0 0 0 00 3013822233900  
0 1 0 0 0 1 0 0 0 2 0 4 0 0 3 0 0 0 0 1 0 3 6 8 5 0 2 2 0 1 6 5 3 1

ysi  
 pel  
 otr  
 ich  
 ale  
 s|f  
 \_\_E  
 rys  
 ipe  
 lot  
 ric  
 hac  
 eae  
 |g\_  
 \_Tu  
 ric  
 iba  
 cte  
 r  
 d\_\_  
 Bac  
 ter  
 ial  
 p\_\_  
 Fir  
 mic  
 ute  
 s|c  
 \_\_B  
 aci  
 lli  
 |o\_  
 \_Er  
 ysi  
 pel  
 otr  
 ich  
 ale  
 s|f  
 \_\_E

|     |   |   |   |   |   |   |    |               |       |       |   |   |   |   |   |   |   |   |   |   |   |   |   |   |   |   |   |   |   |   |
|-----|---|---|---|---|---|---|----|---------------|-------|-------|---|---|---|---|---|---|---|---|---|---|---|---|---|---|---|---|---|---|---|---|
| rys | 0 | 0 | 0 | 0 | 0 | 0 | 00 | 0000          | 10300 | 1100  |   |   |   |   |   |   |   |   |   |   |   |   |   |   |   |   |   |   |   |   |
| ipe | . | . | . | . | . | . | .. | .....         | ..... | ..... |   |   |   |   |   |   |   |   |   |   |   |   |   |   |   |   |   |   |   |   |
| lot | 0 | 1 | 1 | 0 | 0 | 0 | 00 | 3013822233900 |       |       |   |   |   |   |   |   |   |   |   |   |   |   |   |   |   |   |   |   |   |   |
| ric | 0 | 1 | 0 | 0 | 0 | 2 | 0  | 4             | 0     | 0     | 3 | 0 | 0 | 0 | 0 | 1 | 0 | 3 | 6 | 8 | 5 | 0 | 2 | 2 | 0 | 1 | 6 | 5 | 3 | 1 |

















ied  
|s\_  
\_Ae  
roc  
occ  
ace  
ae\_  
unc  
las  
sif  
ied  
d\_  
Bac  
ter  
ia|  
p\_  
Fir  
mic  
ute  
s|c  
\_\_B  
aci  
lli  
lo\_  
\_La  
cto  
bac  
ill  
ale  
s|f  
\_\_A  
ero  
coc  
cac  
eae  
lg\_  
\_Ae  
roc  
occ  
us  
d\_  
Bac  
ter  
ia|

|  |                                     |     |                 |                 |
|--|-------------------------------------|-----|-----------------|-----------------|
|  |                                     | 0 0 | 0               | 0 0 0 0 0 0 0 0 |
|  |                                     | .   | .               | .               |
|  |                                     | 0 0 | 0               | 0 0 0 0 0 0 0 0 |
|  | 0 0 0 0 0 0 0 0 0 0 0 0 0 0 0 0 0 0 | 1 3 | 0 0 0 0 0 0 0 0 | 2 3 2 2 1 2 1 2 |
|  |                                     | 0 0 | 0               | 0 0 0 0 0 0 0 0 |
|  |                                     | .   | .               | .               |
|  |                                     | 0 0 | 0               | 0 0 0 0 0 0 0 0 |
|  | 0 0 0 0 0 0 0 0 0 0 0 0 0 0 0 0 0 0 | 1 3 | 0 0 0 0 0 0 0 0 | 2 2 1 2 1 1 1 1 |



lli  
lo\_  
\_La  
cto  
bac  
ill  
ale  
s|f  
\_\_A  
ero  
coc  
cac  
eae  
lg\_  
\_Ae  
roc  
occ  
us|  
s\_\_  
Aer  
oco  
ccu  
s\_s  
uis  
d\_\_  
Bac  
ter  
ia|  
p\_\_  
Fir  
mic  
ute  
s|c  
\_\_B  
aci  
lli  
lo\_  
\_La  
cto  
bac  
ill  
ale  
s|f  
\_\_A

0 0            0 0            0 0 0  
. .            . . .  
0 0            0 0 0  
0 0 0 0 0 0 0 0 0 0 0 0 0 1 1 0 0 0 0 0 8 3 0 0 0 0 0 0 0 0 0 0 0 0 0 0 0 0 0 0 0 0





















ill  
ale  
s|f  
\_\_C  
arn  
oba  
cte  
ria  
cea  
elg  
\_\_G  
ran  
uli  
cat  
ell  
a  
d\_\_  
Bac  
ter  
ia|  
p\_\_  
Fir  
mic  
ute  
s|c  
\_\_B  
aci  
lli  
lo\_  
\_La  
cto  
bac  
ill  
ale  
s|f  
\_\_C  
arn  
oba  
cte  
ria  
cea                     0  
elg                     .  
\_\_G                     0  
ran 0 0 0 0 0 0 0 0 0 0 0 0 0 0 0 0 0 0 0 0 0 0 0 0 0 0 0 0 0 0

uli  
cat  
ell  
a|s  
\_\_G  
ran  
uli  
cat  
ell  
a\_s  
p.\_  
M65  
8/9  
9/3  
d\_\_  
Bac  
ter  
ia|  
p\_\_  
Fir  
mic  
ute  
s|c  
\_\_B  
aci  
lli  
|o\_  
\_La  
cto  
bac  
ill  
ale  
s|f  
\_\_C  
arn  
oba  
cte  
ria  
cea  
e|g  
\_\_T  
ric  
hoc  
occ

0 0 0 0 0 0 0 0 0 0 0 0 0 0 0 0 0 0 0 0 0 0 0 0 0 0 0 0 0 0 0 0 0 0 0 0 0 0 0 0 0 0 0 0 0 0 0 0 0 0 0 0 0 0 1 0 0 0 0 0 0

0  
.  
0

```

us
d__
Bac
ter
ia|
p__
Fir
mic
ute
s|c
__B
aci
lli
|o_
_La
cto
bac
ill
ale
s|f
__C
arn
oba
cte
ria
cea
e|g
__T
ric
hoc
occ
us|
s__
unc
ult
ure
d_T
ric
hoc
occ
us_
sp. 0 0 0 0 0 0 0 0 0 0 0 0 0 0 0 0 0 0 0 0 0 0 0 0 0 0 0 1 0 0 0 0 0 0
d__      0      0      0      0 0  0  0  0  0  0  0  0  0  0
Bac 0 0 0 0 . 0 0 0 . 0 0 0 0 . 0 0 0 0 . . 0 . 0 . . 0 . . 0 0 . . . . 0 0 0

```

|     |         |         |         |         |         |         |         |               |
|-----|---------|---------|---------|---------|---------|---------|---------|---------------|
| ter | 0       | 0       | 0       | 0 0     | 0       | 0 3     | 0 0     | 0 0 0 0       |
| ia  | 0       | 1       | 1       | 2 1     | 3       | 1 0     | 1 1     | 0 9 1 2       |
| p__ |         |         |         |         |         |         |         |               |
| Fir |         |         |         |         |         |         |         |               |
| mic |         |         |         |         |         |         |         |               |
| ute |         |         |         |         |         |         |         |               |
| s c |         |         |         |         |         |         |         |               |
| __B |         |         |         |         |         |         |         |               |
| aci |         |         |         |         |         |         |         |               |
| lli |         |         |         |         |         |         |         |               |
| o_  |         |         |         |         |         |         |         |               |
| _La |         |         |         |         |         |         |         |               |
| cto |         |         |         |         |         |         |         |               |
| bac |         |         |         |         |         |         |         |               |
| ill |         |         |         |         |         |         |         |               |
| ale |         |         |         |         |         |         |         |               |
| s f |         |         |         |         |         |         |         |               |
| __E |         |         |         |         |         |         |         |               |
| n   |         |         |         |         |         |         |         |               |
| te  |         |         |         |         |         |         |         |               |
| roc |         |         |         |         |         |         |         |               |
| occ |         |         |         |         |         |         |         |               |
| ace |         |         |         |         |         |         |         |               |
| ae  |         |         |         |         |         |         |         |               |
| d__ |         |         |         |         |         |         |         |               |
| Bac |         |         |         |         |         |         |         |               |
| ter |         |         |         |         |         |         |         |               |
| ia  |         |         |         |         |         |         |         |               |
| p__ |         |         |         |         |         |         |         |               |
| Fir |         |         |         |         |         |         |         |               |
| mic |         |         |         |         |         |         |         |               |
| ute |         |         |         |         |         |         |         |               |
| s c |         |         |         |         |         |         |         |               |
| __B |         |         |         |         |         |         |         |               |
| aci |         |         |         |         |         |         |         |               |
| lli |         |         |         |         |         |         |         |               |
| o_  |         |         |         |         |         |         |         |               |
| _La |         |         |         |         |         |         |         |               |
| cto |         |         |         |         |         |         |         |               |
| bac |         |         |         |         |         |         |         |               |
| ill |         |         |         |         |         |         |         |               |
| ale | 0       | 0       | 0       | 0 0     | 0       | 0 0     | 0 0     | 0 0 0 0       |
| s f | .       | .       | .       | ..      | .       | ..      | ..      | ..            |
| __E | 0       | 0       | 0       | 0 0     | 0       | 0 3     | 0 0     | 0 0 0 0       |
| n   | 0       | 0       | 0       | 0 0     | 0       | 0 3     | 0 0     | 0 0 0 0       |
| te  | 0 0 0 0 | 0 0 0 0 | 1 0 0 0 | 1 0 0 0 | 2 1 0 3 | 0 1 0 0 | 1 1 0 0 | 0 9 1 2 0 0 0 |

```

roc
occ
ace
ae|
g__
Ent
ero
coc
cus
d__
Bac
ter
ia|
p__
Fir
mic
ute
s|c
__B
aci
lli
|o_
_La
cto
bac
ill
ale
s|f
__E
nte
roc
occ
ace
ae|
g__
Ent
ero
coc
cus
|s_
_En      0    0    0    0 0    0    0 0 0
ter      .    .    .    . .    .    . . .
oco      0    0    0    0 0    0    0 0 0
ccu 0 0 0 0 0 0 0 1 0 0 0 1 0 0 0 2 1 0 0 0 1 0 0 0 0 0 0 0 0 0 9 1 0 0 0 0

```



ter 0  
 ia| 2

p\_\_  
 Fir  
 mic  
 ute  
 s|c

\_\_B  
 aci  
 lli  
 |o\_  
 \_La  
 cto  
 bac  
 ill  
 ale  
 s|f

\_\_E  
 nte  
 roc  
 occ  
 ace  
 ae|

g\_\_  
 Ent  
 ero  
 coc  
 cus

|s\_  
 \_En  
 ter  
 oco  
 ccu

s\_g  
 all  
 ina  
 rum

d\_\_  
 Bac

|     |   |   |   |   |   |   |   |   |       |   |   |   |   |   |   |   |   |           |   |   |         |   |     |   |   |   |   |   |   |   |   |   |   |   |   |
|-----|---|---|---|---|---|---|---|---|-------|---|---|---|---|---|---|---|---|-----------|---|---|---------|---|-----|---|---|---|---|---|---|---|---|---|---|---|---|
| ter | 2 |   |   |   |   |   |   |   | 2 6 1 |   |   |   |   |   |   |   |   | 2 2 4 4 3 |   |   | 1 5 5 1 |   | 2 5 |   |   |   |   |   |   |   |   |   |   |   |   |
| ia  | 4 | 1 | 2 | 5 | 5 | 0 | 1 | 0 | 0     | 2 | 0 | 3 | 7 | 3 | 0 | 2 | 1 | 2         | 1 | 1 | 2       | 4 | 8   | 3 | 1 | 2 | 2 | 0 | 3 | 6 | 0 | 7 | 4 | 4 |   |
| p__ | . | . | . | . | . | . | . | . | .     | . | . | . | . | . | . | . | . | .         | . | . | .       | . | .   | . | . | . | . | . | . | . | . | . | . | . | . |
| Fir | 6 | 3 | 6 | 0 | 4 | 5 | 1 | 4 | 4     | 5 | 3 | 4 | 3 | 8 | 2 | 8 | 4 | 7         | 4 | 3 | 6       | 1 | 8   | 6 | 3 | 1 | 0 | 9 | 6 | 1 | 0 | 0 | 0 | 5 |   |
| mic | 6 | 6 | 6 | 7 | 4 | 6 | 7 | 7 | 1     | 1 | 2 | 7 | 2 | 5 | 7 | 1 | 5 | 3         | 2 | 2 | 0       | 3 | 5   | 6 | 9 | 8 | 0 | 3 | 7 | 6 | 6 | 8 | 5 | 9 |   |

```

ute
s|c
__B
aci
lli
|o_
_La
cto
bac
ill
ale
s|f
__L
act
oba
cil
lac
eae
d__
Bac
ter
ia|
p__
Fir
mic
ute
s|c
__B
aci
lli
|o_
_La
cto
bac
ill
ale
s|f
__L
act
oba
cil 0 0 0 1 5 0 0 0 0 0 0 0 0 0 0 0 0 0 0 0 0 0 0 1 1 0 0 0 0 0 0 0 0 1 0 0 0 0 0
lac . . . . .
eae 0 0 4 2 0 0 0 0 0 1 0 4 1 4 1 1 0 0 0 4 5 4 7 1 0 1 1 2 0 1 5 1 4 7
|g_ 6 6 8 0 5 7 8 9 7 2 6 4 3 8 3 5 8 9 6 2 7 3 8 8 7 6 6 8 2 8 0 3 1 1

```











lg\_  
 \_La  
 cto  
 bac  
 ill  
 ace  
 ae\_  
 unc  
 las  
 sif  
 ied  
 |s\_  
 \_La  
 cto  
 bac  
 ill  
 ace  
 ae\_  
 unc  
 las  
 sif  
 ied  
 d\_  
 Bac  
 ter  
 ia|  
 p\_  
 Fir  
 mic  
 ute  
 s|c  
 \_\_B  
 aci  
 lli  
 |o\_  
 \_La  
 cto  
 bac  
 ill  
 ale  
 s|f  
 \_\_L  
 act  
 oba

1  
 1  
 1 4  
 1 1  
 0 0 2 3 9 0 0 0 0 0 0 2 2 6 1 1 0 1 0 7 4 7 2 0 0 0 0 0 1 0 1 0 0 5  
 . . . . .  
 2 1 0 6 9 1 9 1 1 6 0 5 1 0 6 6 3 0 5 5 7 6 2 3 0 1 2 5 0 5 2 2 7 7  
 5 6 4 1 0 7 0 7 0 2 7 2 2 1 2 3 5 5 0 3 6 2 3 4 5 4 1 0 3 5 9 6 7 7

cil  
 lac  
 eae  
 |g\_  
 \_La  
 cto  
 bac  
 ill  
 us  
 d\_\_  
 Bac  
 ter  
 ia|  
 p\_\_  
 Fir  
 mic  
 ute  
 s|c  
 \_\_B  
 aci  
 lli  
 |o\_  
 \_La  
 cto  
 bac  
 ill  
 ale  
 s|f  
 \_\_L  
 act  
 oba  
 cil  
 lac  
 eae  
 |g\_  
 \_La  
 cto  
 bac  
 ill  
 us|  
 s\_\_            0 0            0 0 0            0 0 0 0 0 0 0 0 0 0  
 Lac            . .            . . .            . . .            . . . . .            . . .  
 tob            0 0            0 0 0            0 0 0 0 0 0 0 0 0 0  
 aci 0 0 0 0 0 3 0 3 0 0 0 0 0 0 3 1 2 0 0 0 2 0 2 0 1 0 1 4 7 4 4 0 1 1 2

llu  
s\_c  
ris  
pat  
us  
d\_\_  
Bac  
ter  
ia|  
p\_\_  
Fir  
mic  
ute  
s|c  
\_\_B  
aci  
lli  
|o\_  
\_La  
cto  
bac  
ill  
ale  
s|f  
\_\_L  
act  
oba  
cil  
lac  
eae  
|g\_  
\_La  
cto  
bac  
ill  
us|  
s\_\_  
Lac  
tob  
aci

|     |                       |                                 |                     |
|-----|-----------------------|---------------------------------|---------------------|
| llu | 0 0 0 0 0 0 0 0 0 0   | 0 0 0 0 0 0 0 0 0 0 0 0 0 0 0 0 | 0 0 0 0 0 0 0 0 0 0 |
| s_i | . . . . .             | . . . . .                       | . . . . .           |
| n   | 0 0 0 0 3 0 0 0 0 0   | 0 0 0 0 0 0 0 0 0 0 0 0 0 0 0 0 | 0 0 0 0 0 0 0 0 2 2 |
| sti | 3 2 2 6 0 2 4 1 1 2 0 | 6 3 1 3 1 1 2 3 2 4 2 1 1 0     | 1 2 2 3 2 2 2 0 4   |







```

ute
s|c
__B
aci
lli
|o_
_La
cto
bac
ill
ale
s|f
__L
act
oba
cil
lac
eae
|g_
_La
cto
bac
ill
us|
s__
Lac
tob
aci
llu
s_s
p._
BL3
01
d__
Bac
ter
ia|
p__
Fir
mic          1          1          1          1
ute  0 0 2 3 9 0 0 0 0 0 2 2 5 1 1 0 1 0 0 0 4 2 0 0 0 0 0 0 0 0 0 0 0 6 0
s|c  . . . . . . . . . . . . . . . . . . . . . . . . . . . . . . . . . . . .
__B  2 1 0 5 4 1 8 1 0 5 0 4 1 8 5 6 3 0 4 3 1 2 5 1 0 0 1 1 5 3 2 2 1 9
aci  2 5 1 6 6 1 2 4 9 6 7 6 0 9 7 0 4 2 7 6 6 7 5 2 5 8 6 7 5 1 7 0 3 0

```

```

lli
|o_
_La
cto
bac
ill
ale
s|f
__L
act
oba
cil
lac
eae
|g_
_La
cto
bac
ill
us|
s__
Lac
tob
aci
llu
s_s
p._
L-
YJ
d__
Bac
ter
ia|
p__
Fir
mic
ute
s|c
__B
aci
lli      0  0  0
|o_      .  .  .
_La      0  0  0
cto 0 0 0 0 3 0 2 0 0 4 0 0 0 0 0 0 0 0 0 0 0 3 6 4 6 3 0 4 0 4 1 7 0 4 9 2

```

1 2





oba  
 cil  
 lac  
 eae  
 |g\_  
 \_La  
 cto  
 bac  
 ill  
 us|  
 s\_\_  
 unc  
 ult  
 ure  
 d\_L  
 act  
 oba  
 cil  
 lus  
 \_sp  
 .  
 d\_\_  
 Bac  
 ter  
 ia|  
 p\_\_  
 Fir  
 mic  
 ute  
 s|c  
 \_\_B  
 aci  
 lli  
 |o\_  
 \_La  
 cto  
 bac  
 ill  
 ale  
 s|f  
 \_\_L  
 act  
 oba  
 cil

|     |   |   |   |   |   |   |   |   |   |   |   |   |     |   |   |       |   |   |       |     |   |   |   |   |   |   |   |   |   |   |   |   |   |   |
|-----|---|---|---|---|---|---|---|---|---|---|---|---|-----|---|---|-------|---|---|-------|-----|---|---|---|---|---|---|---|---|---|---|---|---|---|---|
|     |   |   |   |   |   |   |   |   |   |   |   |   | 2 4 |   |   | 1 1 2 | 3 |   | 1 5 5 | 1 3 |   |   |   |   |   |   |   |   |   |   |   |   |   |   |
| __L | 4 | 1 | 0 | 0 | 0 | 0 | 0 | 0 | 1 | 0 | 0 | 5 | 7   | 8 | 1 | 1     | 1 | 0 | 2     | 6   | 6 | 5 | 3 | 1 | 1 | 1 | 0 | 1 | 5 | 8 | 6 | 2 | 8 |   |
| act | . | . | . | . | . | . | . | . | . | . | . | . | .   | . | . | .     | . | . | .     | .   | . | . | . | . | . | . | . | . | . | . | . | . | . | . |
| oba | 3 | 1 | 1 | 2 | 4 | 3 | 2 | 2 | 2 | 7 | 2 | 5 | 0   | 3 | 5 | 0     | 0 | 5 | 8     | 3   | 2 | 0 | 8 | 1 | 2 | 8 | 6 | 1 | 6 | 4 | 2 | 6 | 8 | 1 |
| cil | 6 | 2 | 4 | 4 | 8 | 2 | 0 | 0 | 4 | 7 | 0 | 1 | 5   | 5 | 3 | 4     | 0 | 8 | 6     | 8   | 8 | 8 | 2 | 4 | 7 | 7 | 2 | 5 | 2 | 3 | 7 | 9 | 7 | 1 |

lac  
eae  
lg\_  
\_Li  
gil  
act  
oba  
cil  
lus  
d\_\_  
Bac  
ter  
ia|  
p\_\_  
Fir  
mic  
ute  
s|c  
\_\_B  
aci  
lli  
|o\_  
\_La  
cto  
bac  
ill  
ale  
s|f  
\_\_L  
act  
oba  
cil  
lac  
eae  
lg\_  
\_Li  
gil  
act  
oba  
cil 2 4 1 1 2 3 1 5 5 1 3  
lus 4 1 0 0 0 0 0 0 0 1 0 0 5 7 8 1 1 1 0 2 6 6 5 3 1 1 1 0 1 5 8 6 2 8  
|s\_  
\_Li 3 1 1 2 4 3 2 2 2 7 2 5 0 3 5 0 0 5 8 3 2 0 8 1 2 8 6 1 6 4 2 6 8 1  
gil 6 2 4 4 8 2 0 0 4 7 0 1 5 5 3 4 0 8 6 8 8 8 2 4 7 7 2 5 2 3 7 9 7 1

act  
 oba  
 cil  
 lus  
 \_un  
 cla  
 ssi  
 fie  
 d  
 d\_\_  
 Bac  
 ter  
 ial  
 p\_\_  
 Fir  
 mic  
 ute  
 s|c  
 \_\_B  
 aci  
 lli  
 |o\_  
 \_La  
 cto  
 bac  
 ill  
 ale  
 s|f  
 \_\_L  
 act  
 oba  
 cil  
 lac  
 eae  
 |g\_  
 \_Li  
 mos  
 ila  
 cto 0 0 0 0 0 0 0 0 0 0 0 0 2 1 0 0 2 1 0 0 0 0 0 0 0 0 0 0 0 0 0 0 0 0  
 bac . . . . . . . . . . .  
 ill 0 0 0 0 0 0 0 0 0 0 2 1 0 0 2 1 0 0 0 0 0 0 0 0 0 0 0 0 0 0 0 0 0 0  
 us 0 1 1 1 1 0 0 0 0 0 0 0 2 1 0 0 2 1 0 0 0 0 0 0 0 0 0 0 0 0 0 0 0 0  
 d\_\_ 0 0 0 0 0 0 0 0 0 0 0 0 0 0 0 0 0 0 0 0 0 0 0 0 0 0 0 0 0 0 0 0  
 Bac 0 . . . . 0 0 0 0 0 0 0 0 0 . . 0 0 . . 0 0 0 0 0 0 0 0 0 0 0 0 0 0 0 0 .



|     |                                                                                                 |  |     |     |   |
|-----|-------------------------------------------------------------------------------------------------|--|-----|-----|---|
| ter | 0 0 0 0                                                                                         |  | 0 0 | 0 0 | 0 |
| ia  | 1 1 1 1                                                                                         |  | 2 1 | 2 1 | 0 |
| p__ |                                                                                                 |  |     |     |   |
| Fir |                                                                                                 |  |     |     |   |
| mic |                                                                                                 |  |     |     |   |
| ute |                                                                                                 |  |     |     |   |
| s c |                                                                                                 |  |     |     |   |
| __B |                                                                                                 |  |     |     |   |
| aci |                                                                                                 |  |     |     |   |
| lli |                                                                                                 |  |     |     |   |
| o_  |                                                                                                 |  |     |     |   |
| _La |                                                                                                 |  |     |     |   |
| cto |                                                                                                 |  |     |     |   |
| bac |                                                                                                 |  |     |     |   |
| ill |                                                                                                 |  |     |     |   |
| ale |                                                                                                 |  |     |     |   |
| s f |                                                                                                 |  |     |     |   |
| __L |                                                                                                 |  |     |     |   |
| act |                                                                                                 |  |     |     |   |
| oba |                                                                                                 |  |     |     |   |
| cil |                                                                                                 |  |     |     |   |
| lac |                                                                                                 |  |     |     |   |
| eae |                                                                                                 |  |     |     |   |
| g_  |                                                                                                 |  |     |     |   |
| _Li |                                                                                                 |  |     |     |   |
| mos |                                                                                                 |  |     |     |   |
| ila |                                                                                                 |  |     |     |   |
| cto |                                                                                                 |  |     |     |   |
| bac |                                                                                                 |  |     |     |   |
| ill |                                                                                                 |  |     |     |   |
| us  |                                                                                                 |  |     |     |   |
| s__ |                                                                                                 |  |     |     |   |
| Lim |                                                                                                 |  |     |     |   |
| osi |                                                                                                 |  |     |     |   |
| lac |                                                                                                 |  |     |     |   |
| tob |                                                                                                 |  |     |     |   |
| aci |                                                                                                 |  |     |     |   |
| llu |                                                                                                 |  |     |     |   |
| s_u |                                                                                                 |  |     |     |   |
| ncl |                                                                                                 |  |     |     |   |
| ass |                                                                                                 |  |     |     |   |
| ifi |                                                                                                 |  |     |     |   |
| ed  |                                                                                                 |  |     |     |   |
| d__ | 0 0 0 0 0 0 0 0 0 0 0 0 0 0 0 0 0 0 0 0 0 0 0 0 2 0 0 0 0 0 0 0 0 0 0 0 0 0 0 0 0 0 0 0 0 0 0 0 |  |     |     |   |





```
cus
_ga
rvi
eae
d__
Bac
ter
ia|
p__
Fir
mic
ute
s|c
__B
aci
lli
|o_
_La
cto
bac
ill
ale
s|f
__S
tre
pto
coc
cac
eae
|g_
_La
cto
coc
cus
|s_
_La
cto
coc
cus          0
_sp          .
._A         0
Ra2 0 0 0 0 0 0 0 0 0 0 0 0 0 0 0 0 0 1 0 0 0 0 0 0 0 0 0 0 0 0 0 0
d__ 0 0 0 0 0 0 0 0 0 0 0 0 0 0 0 0 0 0 2 0 0 0 0 0 0 0 0 0 0 0 0 0
Bac . . . . .
```

ter 5 1 0 0 0 1 0 0 0 2 3 3 1 0 0 2 0 1 0 5 6 4 1 0 0 1 1 2 6 2 2 2 6 2  
ia| 7 1 9 4 3 4 1 5 9 5 7 5 2 2 3 2 8 0 2 3 5 0 8 9 7 8 5 3 3 3 5 7 4 6

p\_\_

Fir

mic

ute

s|c

\_\_B

aci

lli

|o\_

\_La

cto

bac

ill

ale

s|f

\_\_S

tre

pto

coc

cac

eae

lg\_

\_St

rep

toc

occ

us

d\_\_

Bac

ter

ia|

p\_\_

Fir

mic

ute

s|c

\_\_B

aci

lli 0 0                    0 0   0 0   0 0 0 0   0 0 0 0   0   0 0 0   0 0 0

|o\_ . .                    . .   . .   . . . .   . . . .   .   . . .   . . .

\_La 0 0                    0 0   0 0   0 0 0 0   0 0 0 0   0   0 0 0   0 0 0

cto 1 1 0 0 0 0 0 0 1 1 0 1 1 0 1 2 1 2 0 2 2 1 1 0 1 0 0 1 2 3 0 1 1 1



```

s|f
__S
tre
pto
coc
cac
eae
lg_
_st
rep
toc
occ
us|
s__
Str
ept
oco
ccu
s_d
ani
eli
ae
d__
Bac
ter
ia|
p__
Fir
mic
ute
s|c
__B
aci
lli
|o_
_La
cto
bac
ill
ale
s|f      0 0  0 0    0    0 0    0    0      0      0
__S      . .  . .    .    . .    .    .      .      .
tre      0 0  0 0    0    0 0    0    0      0      0
pto 0 0 0 0 2 1 0 2 1 0 0 1 0 0 1 1 0 0 2 0 0 1 0 0 0 0 0 2 0 0 0 0 0 0 1

```













ia|

1

p\_\_

Fir

mic

ute

s|c

\_\_B

aci

lli

|o\_

\_La

cto

bac

ill

ale

s|f

\_\_S

tre

pto

coc

cac

eae

|g\_

\_St

rep

toc

occ

us|

s\_\_

Str

ept

oco

ccu

s\_s

p.\_

GDL

AMI

-

SD2

d\_\_

Bac

0 0

ter

. .

ia|

0 0

p\_\_

0 0 0 0 0 0 0 0 0 0 0 0 0 0 0 2 0 1 0 0 0 0 0 0 0 0 0 0 0 0 0 0 0 0 0 0 0 0 0 0













```

ute
s|c
__B
aci
lli
|o_
_La
cto
bac
ill
ale
s|f
__v
ago
coc
cac
eae
|g_
_Va
goc
occ
us|
s__
Vag
oco
ccu
s_u
ncl
ass
ifi
ed
d__
Bac
ter
ia|
p__
Fir
mic
ute
s|c
__B  0 0 0 0 0    0  0 0  0  0 0 0 0 0 0 0 0 0  0 0    0  0  0 0
aci  . . . . .    .  . .  .  . . . . . . . . . . . . .  . .  .  .  . .
lli  0 0 0 0 0    0  0 0  0  0 1 0 0 0 0 0 0 0 0  0 0    0  0  0 0
|o_  6 7 6 1 4 0 0 3 0 5 3 0 3 0 2 4 1 6 5 2 5 4 0 4 4 0 0 1 0 5 0 5 6 0

```

\_My  
cop  
las  
mat  
ale  
s  
d\_\_

Bac  
ter  
ia|  
p\_\_  
Fir  
mic  
ute  
s|c  
\_\_B  
aci  
lli  
|o\_

\_My  
cop  
las  
mat  
ale  
s|f

\_M  
yco  
pla  
sma  
tac  
eae

|   |   |   |   |   |   |   |   |   |   |   |   |   |   |   |   |   |   |   |   |   |   |   |   |   |   |   |   |   |   |   |   |   |   |
|---|---|---|---|---|---|---|---|---|---|---|---|---|---|---|---|---|---|---|---|---|---|---|---|---|---|---|---|---|---|---|---|---|---|
| 0 | 0 | 0 | 0 | 0 | 0 | 0 | 0 | 0 | 0 | 0 | 0 | 0 | 0 | 0 | 0 | 0 | 0 | 0 | 0 | 0 |   |   |   |   |   |   |   |   |   |   |   |   |   |
| . | . | . | . | . | . | . | . | . | . | . | . | . | . | . | . | . | . | . | . | . |   |   |   |   |   |   |   |   |   |   |   |   |   |
| 0 | 0 | 0 | 0 | 0 | 1 | 0 | 0 | 0 | 0 | 0 | 0 | 0 | 0 | 0 | 0 | 0 | 0 | 0 | 0 | 0 |   |   |   |   |   |   |   |   |   |   |   |   |   |
| 6 | 7 | 6 | 1 | 4 | 0 | 0 | 3 | 0 | 5 | 3 | 0 | 3 | 0 | 2 | 4 | 1 | 6 | 5 | 2 | 5 | 4 | 0 | 4 | 4 | 0 | 0 | 1 | 0 | 5 | 0 | 5 | 6 | 0 |

d\_\_  
Bac  
ter  
ia|

p\_\_  
Fir  
mic  
ute  
s|c

\_\_B  
aci  
lli  
|o\_

|   |   |   |   |   |   |   |   |   |   |   |   |   |   |   |   |   |   |   |   |   |   |   |   |   |   |   |   |   |   |   |   |   |   |   |
|---|---|---|---|---|---|---|---|---|---|---|---|---|---|---|---|---|---|---|---|---|---|---|---|---|---|---|---|---|---|---|---|---|---|---|
| 0 | 0 | 0 | 0 | 0 | 0 | 0 | 0 | 0 | 0 | 0 | 0 | 0 | 0 | 0 | 0 | 0 | 0 | 0 | 0 | 0 |   |   |   |   |   |   |   |   |   |   |   |   |   |   |
| . | . | . | . | . | . | . | . | . | . | . | . | . | . | . | . | . | . | . | . | . |   |   |   |   |   |   |   |   |   |   |   |   |   |   |
| 0 | 0 | 0 | 0 | 0 | 0 | 1 | 0 | 0 | 0 | 0 | 0 | 0 | 0 | 0 | 0 | 0 | 0 | 0 | 0 | 0 |   |   |   |   |   |   |   |   |   |   |   |   |   |   |
| 6 | 7 | 6 | 1 | 4 | 0 | 0 | 3 | 0 | 5 | 3 | 0 | 3 | 0 | 2 | 4 | 1 | 6 | 4 | 1 | 3 | 4 | 0 | 4 | 4 | 0 | 0 | 0 | 0 | 0 | 5 | 0 | 5 | 6 | 0 |



```

cop
las
ma|
s__
Myc
opl
asm
a_u
ncl
ass
ifi
ed
d__
Bac
ter
ia|
p__
Fir
mic
ute
s|c
__B
aci
lli
|o_
_My
cop
las
mat
ale
s|f
__M
yco
pla
sma
tac
eae
lg_
_Ur          0          0          0 0 0          0
eap          .          .          . . .          .
las          0          0          0 0 0          0
ma  0 0 0 0 0 0 0 0 0 0 0 0 0 0 0 1 0 0 0 1 1 2 0 0 0 0 0 0 0 1 0 0 0 0 0 0
d__          0          0          0 0 0          0
Bac  0 0 0 0 . 0 0 0 0 0 0 0 0 0 0 . 0 0 0 . . . 0 0 0 0 0 0 0 . 0 0 0 0 0 0

```

|     |                                                                           |  |   |       |   |           |       |
|-----|---------------------------------------------------------------------------|--|---|-------|---|-----------|-------|
| ter | 0                                                                         |  | 0 | 0 0 0 | 0 |           |       |
| ia  | 0                                                                         |  | 1 | 1 1 2 | 1 |           |       |
| p__ |                                                                           |  |   |       |   |           |       |
| Fir |                                                                           |  |   |       |   |           |       |
| mic |                                                                           |  |   |       |   |           |       |
| ute |                                                                           |  |   |       |   |           |       |
| s c |                                                                           |  |   |       |   |           |       |
| __B |                                                                           |  |   |       |   |           |       |
| aci |                                                                           |  |   |       |   |           |       |
| lli |                                                                           |  |   |       |   |           |       |
| o_  |                                                                           |  |   |       |   |           |       |
| _My |                                                                           |  |   |       |   |           |       |
| cop |                                                                           |  |   |       |   |           |       |
| las |                                                                           |  |   |       |   |           |       |
| mat |                                                                           |  |   |       |   |           |       |
| ale |                                                                           |  |   |       |   |           |       |
| s f |                                                                           |  |   |       |   |           |       |
| __M |                                                                           |  |   |       |   |           |       |
| yco |                                                                           |  |   |       |   |           |       |
| pla |                                                                           |  |   |       |   |           |       |
| sma |                                                                           |  |   |       |   |           |       |
| tac |                                                                           |  |   |       |   |           |       |
| eae |                                                                           |  |   |       |   |           |       |
| g_  |                                                                           |  |   |       |   |           |       |
| _Ur |                                                                           |  |   |       |   |           |       |
| eap |                                                                           |  |   |       |   |           |       |
| las |                                                                           |  |   |       |   |           |       |
| ma  |                                                                           |  |   |       |   |           |       |
| s__ |                                                                           |  |   |       |   |           |       |
| Ure |                                                                           |  |   |       |   |           |       |
| apl |                                                                           |  |   |       |   |           |       |
| asm |                                                                           |  |   |       |   |           |       |
| a_u |                                                                           |  |   |       |   |           |       |
| ncl |                                                                           |  |   |       |   |           |       |
| ass |                                                                           |  |   |       |   |           |       |
| ifi |                                                                           |  |   |       |   |           |       |
| ed  |                                                                           |  |   |       |   |           |       |
| d__ |                                                                           |  |   |       |   |           |       |
| Bac |                                                                           |  |   |       |   |           |       |
| ter |                                                                           |  |   |       |   |           |       |
| ia  |                                                                           |  | 0 | 0     | 0 | 0 0 0 0 0 | 0 0 0 |
| p__ |                                                                           |  | . | .     | . | . . . . . | . . . |
| Fir |                                                                           |  | 0 | 0     | 0 | 0 0 0 0 0 | 0 0 0 |
| mic | 0 0 0 0 0 0 0 0 0 0 0 0 0 0 0 0 0 0 1 0 0 1 0 0 2 0 0 0 0 2 1 1 2 0 1 0 2 |  |   |       |   |           |       |

ute  
s|c  
\_\_B  
aci  
lli  
|o\_  
\_Pa  
eni  
bac  
ill  
ale  
s

d\_\_  
Bac  
ter  
ia|  
p\_\_  
Fir  
mic

ute  
s|c  
\_\_B  
aci  
lli  
|o\_  
\_Pa  
eni  
bac  
ill  
ale  
s|f  
\_\_P  
aen

|     |   |   |   |   |   |   |   |   |   |   |   |   |   |   |   |   |   |   |   |   |   |   |   |   |   |   |   |   |   |   |   |   |   |
|-----|---|---|---|---|---|---|---|---|---|---|---|---|---|---|---|---|---|---|---|---|---|---|---|---|---|---|---|---|---|---|---|---|---|
| iba | 0 | 0 | 0 | 0 | 0 | 0 | 0 | 0 | 0 | 0 | 0 | 0 | 0 | 0 | 0 | 0 | 0 | 0 | 0 | 0 |   |   |   |   |   |   |   |   |   |   |   |   |   |
| cil | . | . | . | . | . | . | . | . | . | . | . | . | . | . | . | . | . | . | . | . |   |   |   |   |   |   |   |   |   |   |   |   |   |
| lac | 0 | 0 | 0 | 0 | 0 | 0 | 0 | 0 | 0 | 0 | 0 | 0 | 0 | 0 | 0 | 0 | 0 | 0 | 0 | 0 |   |   |   |   |   |   |   |   |   |   |   |   |   |
| eae | 0 | 0 | 0 | 0 | 0 | 0 | 0 | 0 | 0 | 0 | 0 | 0 | 0 | 1 | 0 | 0 | 1 | 0 | 0 | 2 | 0 | 0 | 0 | 0 | 2 | 1 | 1 | 2 | 0 | 1 | 0 | 2 |   |
| d__ |   |   |   |   |   |   |   |   |   |   |   |   |   |   |   |   |   |   |   |   |   |   |   |   |   |   |   |   |   |   |   |   |   |
| Bac |   |   |   |   |   |   |   |   |   |   |   |   |   |   |   |   |   |   |   |   |   |   |   |   |   |   |   |   |   |   |   |   |   |
| ter |   |   |   |   |   |   |   |   |   |   |   |   |   |   |   |   |   |   |   |   |   |   |   |   |   |   |   |   |   |   |   |   |   |
| ia  | 0 | 0 | 0 | 0 | 0 | 0 | 0 | 0 | 0 | 0 | 0 | 0 | 0 | 0 | 0 | 0 | 0 | 0 | 0 | 0 | 0 | 0 | 0 | 0 | 0 | 0 | 0 | 0 | 0 | 0 | 0 |   |   |
| p__ | . | . | . | . | . | . | . | . | . | . | . | . | . | . | . | . | . | . | . | . | . | . | . | . | . | . | . | . | . | . | . | . | . |
| Fir | 0 | 0 | 0 | 0 | 0 | 0 | 0 | 0 | 0 | 0 | 0 | 0 | 0 | 0 | 0 | 0 | 0 | 0 | 0 | 0 | 0 | 0 | 0 | 0 | 0 | 0 | 0 | 0 | 0 | 0 | 0 |   |   |
| mic | 0 | 0 | 0 | 0 | 0 | 0 | 0 | 0 | 0 | 0 | 0 | 0 | 0 | 1 | 0 | 0 | 1 | 0 | 0 | 2 | 0 | 0 | 0 | 0 | 0 | 0 | 0 | 2 | 0 | 0 | 0 | 1 |   |



```

ute
s|c
__B
aci
lli
|o_
_Pa
eni
bac
ill
ale
s|f
__P
aen
iba
cil
lac
eae
|g_
_Pa
eni
bac
ill
ace
ae_
unc
las
sif
ied
d__
Bac
ter
ia|
p__
Fir
mic
ute
s|c
__B
aci
lli          0    0    0    0    0    0
|o_          .    .    .    .    .    .
_Pa          0    0    0    0    0    0
eni 0 0 0 0 0 0 0 0 0 0 0 0 0 0 0 1 0 0 1 0 0 2 0 0 0 0 0 0 0 0 2 0 0 0 1

```



lo\_  
\_Pa  
eni  
bac  
ill  
ale  
s|f  
\_\_P  
aen  
iba  
cil  
lac  
eae  
lg\_  
\_Th  
erm  
oba  
cil  
lus  
d\_  
Bac  
ter  
ia|  
p\_  
Fir  
mic  
ute  
s|c  
\_\_B  
aci  
lli  
lo\_  
\_Pa  
eni  
bac  
ill  
ale  
s|f  
\_\_P  
aen  
iba  
cil  
lac  
eae

0 0 0 0 0 0 0 0 0 0 0 0 0 0 0 0 0 0 0 0 0 0 0 0 0 0 0 0 0 0 0 0 0 2 1 1 0 0 1 0 1

0 0 0      0 0 0  
. . .      . . .

```
lg_
_Th
erm
oba
cil
lus
|s_
_Th
erm
oba
cil
lus
_un
cla
ssi
fie
d
d__
Bac
ter
ia|
p__
Fir
mic
ute
s|c
__B
aci
lli      0 0 0    0 0 0 0 0 0 0 0 0    0 0 0 0    0 0 0 0 0 0 0 0 0 0 0 0 0 0 0
|o_
_RF      . . .    . . . . . . . . . . . . . . . . . . . . . . . . . . . . . . . . . .
39      0 1 2 1 0 0 1 1 1 3 1 9 1 0 1 7 3 5 0 0 4 1 7 5 1 1 6 2 5 3 0 2 8 2
d__
Bac
ter
ia|
p__
Fir
mic
ute
s|c      0 0 0    0 0 0 0 0 0 0 0 0    0 0 0 0    0 0 0 0 0 0 0 0 0 0 0 0 0 0 0
__B
aci      . . .    . . . . . . . . . . . . . . . . . . . . . . . . . . . . . . . . . .
lli      0 0 0    2 2 0 0 1 0 0 0    0 0 0 1    0 1 0 0 1 5 0 1 1 2 7 4 0 0
0 1 2 1 0 0 1 1 1 3 1 9 1 0 1 7 3 5 0 0 4 1 7 5 1 1 6 2 5 3 0 2 8 2
```

```

|o_
_RF
39|
f_
RF3
9_u
ncl
ass
ifi
ed
d_
Bac
ter
ia|
p_
Fir
mic
ute
s|c
__B
aci
lli
|o_
_RF
39|
f_
RF3
9_u
ncl
ass
ifi
ed|
g_
RF3
9_u
ncl    0 0 0    0 0 0 0 0 0 0 0    0 0 0 0    0 0 0 0 0 0 0 0 0 0 0 0 0 0 0
ass    . . .    . . . . . . . . . .    . . . .    . . . . . . . . . . . . . . .
ifi    0 0 0    2 2 0 0 1 0 0 0    0 0 0 1    0 1 0 0 1 5 0 1 1 2 7 4 0 0
ed    0 1 2 1 0 0 1 1 1 3 1 9 1 0 1 7 3 5 0 0 4 1 7 5 1 1 6 2 5 3 0 2 8 2
d_
Bac    0 0 0    0 0 0 0 0 0 0 0    0 0 0 0    0 0 0 0 0 0 0 0 0 0 0 0 0 0 0 0
ter    . . .    . . . . . . . . . .    . . . .    . . . . . . . . . . . . . . .
ia|    0 0 0    2 2 0 0 1 0 0 0    0 0 0 1    0 1 0 0 1 5 0 1 1 2 7 4 0 0
p__    0 1 2 1 0 0 1 1 1 3 1 9 1 0 1 7 3 5 0 0 4 1 7 5 1 1 6 2 5 3 0 2 8 2

```

Fir  
mic  
ute  
s|c  
\_\_B  
aci  
lli  
|o\_  
\_RF  
39|  
f\_\_  
RF3  
9\_u  
ncl  
ass  
ifi  
ed|  
g\_\_  
RF3  
9\_u  
ncl  
ass  
ifi  
ed|  
s\_\_  
RF3  
9\_u  
ncl  
ass  
ifi  
ed  
d\_\_  
Bac  
ter  
ia|  
p\_\_  
Fir  
mic  
ute  
s|c  
\_\_B  
aci  
lli  
|o\_

|                                                                       |   |     |                     |   |                     |
|-----------------------------------------------------------------------|---|-----|---------------------|---|---------------------|
| 0 0 0                                                                 | 0 | 0 0 | 0 0 0 0 0 0 0 0 0 0 | 0 | 0 0 0 0 0 0 0 0     |
| . . .                                                                 | . | . . | . . . . . . . . . . | . | . . . . . . . . . . |
| 0 0 0                                                                 | 0 | 0 0 | 0 0 0 0 0 0 0 0 0 0 | 0 | 0 0 0 0 0 0 0 1 0   |
| 0 3 0 1 0 0 0 0 0 0 1 0 1 5 0 2 1 3 2 3 6 4 5 0 0 9 0 4 1 4 7 3 1 2 4 |   |     |                     |   |                     |

\_St  
aph  
ylo  
coc  
cal  
es

d\_\_  
Bac  
ter  
ial

p\_\_  
Fir  
mic  
ute  
s|c

\_\_B  
aci  
lli

lo\_  
\_St  
aph  
ylo  
coc  
cal  
es|

f\_\_  
Gem  
ell  
ace

|  |   |   |   |   |   |   |   |   |   |   |   |   |   |   |   |   |   |   |   |   |   |   |   |   |   |   |   |   |   |   |   |   |   |
|--|---|---|---|---|---|---|---|---|---|---|---|---|---|---|---|---|---|---|---|---|---|---|---|---|---|---|---|---|---|---|---|---|---|
|  | 0 | 0 | 0 | 0 | 0 | 0 | 0 | 0 | 0 | 0 | 0 | 0 | 0 | 0 | 0 | 0 | 0 | 0 | 0 | 1 | 4 | 0 | 0 | 9 | 0 | 0 | 0 | 0 | 1 | 0 | 1 | 2 | 0 |
|  |   |   |   |   |   |   |   |   |   |   |   |   |   |   |   |   |   |   |   | . | . | . | . | . | . | . | . | . | . | . | . | . | . |
|  |   |   |   |   |   |   |   |   |   |   |   |   |   |   |   |   |   |   |   | 0 | 0 | 0 | 0 | 0 | 0 | 0 | 0 | 0 | 0 | 0 | 0 | 0 | 0 |

d\_\_  
Bac  
ter  
ial

p\_\_  
Fir  
mic  
ute  
s|c

\_\_B  
aci  
lli

|  |   |   |   |   |   |   |   |   |   |   |   |   |   |   |   |   |   |   |   |   |   |   |   |   |   |   |   |   |   |   |   |   |   |
|--|---|---|---|---|---|---|---|---|---|---|---|---|---|---|---|---|---|---|---|---|---|---|---|---|---|---|---|---|---|---|---|---|---|
|  | 0 | 0 | 0 | 0 | 0 | 0 | 0 | 0 | 0 | 0 | 0 | 0 | 0 | 0 | 0 | 0 | 0 | 0 | 0 | 0 | 0 | 0 | 9 | 0 | 0 | 0 | 0 | 1 | 0 | 1 | 2 | 0 |   |
|  |   |   |   |   |   |   |   |   |   |   |   |   |   |   |   |   |   |   |   | . | . | . | . | . | . | . | . | . | . | . | . | . | . |
|  |   |   |   |   |   |   |   |   |   |   |   |   |   |   |   |   |   |   |   | 0 | 0 | 0 | 0 | 0 | 0 | 0 | 0 | 0 | 0 | 0 | 0 | 0 | 0 |

\_St





```

lla
_un
cla
ssi
fie
d
d__
Bac
ter
ia|
p__
Fir
mic
ute
s|c
__B
aci
lli
|o_
_St
aph
ylo
coc
cal
es|
f__
Sta
phy
loc   0 0 0           0  0 0   0 0 0 0 0 0 0 0 0 0           0 0 0 0 0   0 0
occ   . . .           .  . .   . . . . . . . . . .           . . . . .   . .
ace   0 0 0           0  0 0   0 0 0 0 0 0 0 0 0 0           0 0 0 0 0   1 0
ae    0 3 0 1 0 0 0 0 0 0 1 0 1 5 0 2 1 3 2 3 6 3 1 0 0 0 0 0 4 1 4 6 3 0 0 4
d__
Bac
ter
ia|
p__
Fir
mic
ute
s|c   0           0  0 0   0  0       0 0           0  0 0
__B   .           .  . .   .  .       . .           .  . .
aci   0           0  0 0   0  0       0 0           0  0 0
lli   0 0 0 0 0 0 0 0 0 0 1 0 1 2 0 1 0 1 0 0 5 2 0 0 0 0 0 0 0 0 0 0 1 0 0 2 1

```

|o\_  
 \_St  
 aph  
 ylo  
 coc  
 cal  
 es|  
 f\_\_  
 Sta  
 phy  
 loc  
 occ  
 ace  
 ae|  
 g\_\_  
 Jeo  
 tga  
 lic  
 occ  
 us  
 d\_\_  
 Bac  
 ter  
 ia|  
 p\_\_  
 Fir  
 mic  
 ute  
 s|c  
 \_\_B  
 aci  
 lli  
 |o\_  
 \_St  
 aph  
 ylo  
 coc  
 cal  
 es|  
 f\_\_

|     |   |   |   |     |   |   |     |   |   |     |   |   |   |   |   |   |   |   |   |   |   |   |   |   |   |   |   |   |   |   |   |   |   |   |
|-----|---|---|---|-----|---|---|-----|---|---|-----|---|---|---|---|---|---|---|---|---|---|---|---|---|---|---|---|---|---|---|---|---|---|---|---|
| Sta | 0 |   | 0 | 0 0 | 0 | 0 | 0 0 |   | 0 | 0 0 |   |   |   |   |   |   |   |   |   |   |   |   |   |   |   |   |   |   |   |   |   |   |   |   |
| phy | . |   | . | . . | . | . | . . |   | . | . . |   |   |   |   |   |   |   |   |   |   |   |   |   |   |   |   |   |   |   |   |   |   |   |   |
| loc | 0 |   | 0 | 0 0 | 0 | 0 | 0 0 |   | 0 | 0 0 |   |   |   |   |   |   |   |   |   |   |   |   |   |   |   |   |   |   |   |   |   |   |   |   |
| occ | 0 | 0 | 0 | 0   | 0 | 0 | 0   | 1 | 0 | 1   | 2 | 0 | 1 | 0 | 1 | 0 | 0 | 5 | 2 | 0 | 0 | 0 | 0 | 0 | 0 | 0 | 0 | 0 | 0 | 1 | 0 | 0 | 2 | 1 |







```

s|c
__B
aci
lli
|o_
_st
aph
ylo
coc
cal
es|
f__
Sta
phy
loc
occ
ace
ae|
g__
Sal
ini
coc
cus
|s_
_Sa
lin
ico
ccu
s_u
ncl
ass
ifi
ed
d__
Bac
ter
ia|
p__
Fir
mic
ute    0  0                 0 0                 0  0
s|c    .  .                 .  .                 .  .
__B    0  0                 0 0                 0  0
aci    0 1 0 1 0 0 0 0 0 0 0 0 0 0 0 0 0 0 0 1 1 0 0 0 0 0 0 0 0 0 0 0 0 0 1 0 0 1 0

```

```

lli
lo_
_St
aph
ylo
coc
cal
es|
f__
Sta
phy
loc
occ
ace
ae|
g__
Sta
phy
loc
occ
ace
ae_
unc
las
sif
ied
d__
Bac
ter
ial|
p__
Fir
mic
ute
s|c
__B
aci
lli
lo_
_St
aph      0  0                0  0                0  0
ylo      .  .                .  .                .  .
coc      0  0                0  0                0  0
cal      0  1  0  1  0  0  0  0  0  0  0  0  0  0  0  0  0  1  1  0  0  0  0  0  0  0  0  0  0  0  0  1  0  0  1  0

```

```

es|
f__
Sta
phy
loc
occ
ace
ae|
g__
Sta
phy
loc
occ
ace
ae_
unc
las
sif
ied
|s_
_st
aph
ylo
coc
cac
eae
_un
cla
ssi
fie
d
d__
Bac
ter
ia|
p__
Fir
mic
ute
s|c
__B  0          0  0 0 0 0 0  0 0          0 0 0 0 0 0  0 0
aci  .          .  . . . . .  .          . . . . .  . .
lli  0          0  0 0 0 0 0  0 0          0 0 0 0 0 0  0 0
|o_  0 2 0 0 0 0 0 0 0 0 0 0 2 0 1 1 2 2 2 0 2 1 0 0 0 0 4 1 4 4 3 0 6 3

```



```

_St
aph
ylo
coc
cal
es|
f__
Sta
phy
loc
occ
ace
ae|
g__
Sta
phy
loc
occ
us
d__
Bac
ter
ial
p__
Fir
mic
ute
s|c
__B
aci
lli
|o_
_St
aph
ylo
coc
cal
es|
f__
Sta
phy    0                0  0 0 0 0 0  0 0        0 0 0 0 0 0  0 0
loc    .                .  .  .  .  .  .  .        .  .  .  .  .  .  .  .
occ    0                0  0 0 0 0 0  0 0        0 0 0 0 0 0  0 0
ace    0 2 0 0 0 0 0 0 0 0 0 0 0 2 0 1 1 2 2 2 0 2 1 0 0 0 0 4 1 4 4 3 0 6 3

```













```

les
|f_
_Ca
ldi
cop
rob
act
era
cea
elg
__C
ald
ico
pro
bac
ter
|s_
_Ca
ldi
cop
rob
act
er_
unc
las
sif
ied
d__
Bac
ter
ia|
p__
Fir
mic
ute
s|c
__C
los
tri
dia
|o_      0 0   0 0 0   0 0 0 0 0 0 0 0 0   0   0 0 0 0 0 0 0 0 0 0 0 0 0 0
_Ch      . .   . . .   . . . . . . . . .   .   . . . . . . . . . . . . . . .
ris      0 0   0 0 0   0 0 0 0 0 0 1 0 0   0   0 0 0 1 0 0 0 0 0 0 0 0 0 0 0
ten 0 0 4 3 0 4 8 2 0 3 3 1 2 2 2 0 0 2 0 2 0 3 4 4 3 9 3 9 6 7 9 7 5 1

```



sen  
ell  
ale  
s  
d\_\_  
Bac  
ter  
ia|  
p\_\_  
Fir  
mic  
ute  
s|c  
\_\_C  
los  
tri  
dia  
|o\_  
\_Ch  
ris  
ten  
sen  
ell  
ale  
s|f  
\_\_C  
hri  
ste  
nse  
nel  
lac  
eae  
d\_\_  
Bac  
ter  
ia|  
p\_\_  
Fir  
mic  
ute  
s|c  
\_\_C  
los  
tri

|                                                                     |       |                     |   |                                 |
|---------------------------------------------------------------------|-------|---------------------|---|---------------------------------|
| 0 0                                                                 | 0 0 0 | 0 0 0 0 0 0 0 0 0 0 | 0 | 0 0 0 0 0 0 0 0 0 0 0 0 0 0     |
| .                                                                   | .     | .                   | . | .                               |
| 0 0                                                                 | 0 0 0 | 0 0 0 0 0 0 1 0 0   | 0 | 0 0 0 1 0 0 0 0 0 0 0 0 0 0     |
| 0 0 4 3 0 4 8 2 0 3 3 1 2 2 2 0 0 2 0 2 0 3 4 4 3 9 3 9 6 7 9 7 5 1 |       |                     |   |                                 |
| 0 0                                                                 | 0 0 0 | 0 0 0 0 0 0 0 0 0 0 | 0 | 0 0 0 0 0 0 0 0 0 0 0 0 0 0 0 0 |
| .                                                                   | .     | .                   | . | .                               |
| 0 0                                                                 | 0 0 0 | 0 0 0 0 0 0 0 0 0 0 | 0 | 0 0 0 1 0 0 0 0 0 0 0 0 0 0 0 0 |
| 0 0 3 3 0 4 8 2 0 3 3 1 2 2 2 9 0 2 0 1 0 2 3 3 3 8 3 9 6 7 8 7 5 1 |       |                     |   |                                 |

dia  
 lo\_  
 \_Ch  
 ris  
 ten  
 sen  
 ell  
 ale  
 s|f  
 \_\_C  
 hri  
 ste  
 nse  
 nel  
 lac  
 eae  
 lg\_  
 \_Ch  
 ris  
 ten  
 sen  
 ell  
 ace  
 ae\_  
 R-  
 7\_g  
 rou  
 p  
 d\_\_  
 Bac  
 ter  
 ia|  
 p\_\_  
 Fir  
 mic  
 ute  
 s|c  
 \_\_C  
 los  
 tri  
 dia  
 lo\_  
 \_Ch  
 ris

|                                                                     |       |                     |   |                                 |
|---------------------------------------------------------------------|-------|---------------------|---|---------------------------------|
| 0 0                                                                 | 0 0 0 | 0 0 0 0 0 0 0 0 0 0 | 0 | 0 0 0 0 0 0 0 0 0 0 0 0 0 0 0 0 |
| .                                                                   | .     | .                   | . | .                               |
| 0 0                                                                 | 0 0 0 | 0 0 0 0 0 0 0 0 0 0 | 0 | 0 0 0 1 0 0 0 0 0 0 0 0 0 0 0 0 |
| 0 0 3 3 0 4 8 2 0 3 3 1 2 2 2 9 0 2 0 1 0 2 3 3 3 8 3 9 6 7 8 7 5 1 |       |                     |   |                                 |

```

ten
sen
ell
ale
s|f
__C
hri
ste
nse
nel
lac
eae
lg_
_Ch
ris
ten
sen
ell
ace
ae_
R-
7_g
rou
p|s
__C
hri
ste
nse
nel
lac
eae
_R-
7_g
rou
p_u
ncl
ass
ifi
ed
d__
Bac      0                0      0  0 0 0  0  0  0 0  0
ter      .                .      .  .  .  .  .  .  .  .
ia|      0                0      0  0 0 0  0  0  0 0  0
p__ 0 0 0 0 0 0 0 0 0 0 0 0 0 0 0 0 1 0 0 0 1 0 1 0 1 0 0 0 0 0 0 0 0 1 0 0 0

```



\_\_C

los

tri

dia

lo\_

\_Ch

ris

ten

sen

ell

ale

s|f

\_\_C

hri

ste

nse

nel

lac

eae

lg\_

\_Ch

ris

ten

sen

ell

ace

ae\_

unc

las

sif

ied

|s\_

\_Ch

ris

ten

sen

ell

ace

ae\_

unc

las

sif

ied

d\_\_ 0 0 1 0 0 5 1 1 0 3 2 2 0 0 0 8 0 1 0 0 2 0 1 0 6 3 3 3 7 3 3 2 2 0

Bac . . . . .  
ter 2 8 7 4 2 7 9 5 3 6 2 2 1 0 1 1 9 5 1 2 2 7 4 5 7 2 0 3 3 3 5 7 0 4  
ia| 8 1 3 4 5 0 0 8 7 3 6 8 1 5 5 1 3 0 6 2 5 3 4 6 0 2 2 6 3 4 3 9 2 3

p\_\_

Fir

mic

ute

s|c

\_\_C

los

tri

dia

lo\_

\_cl

ost

rid

ia\_

UCG

-

014

d\_\_

Bac

ter

ia|

p\_\_

Fir

mic

ute

s|c

\_\_C

los

tri

dia

lo\_

\_cl

ost

rid

ia\_

UCG

-

014 0 0 1 0 0 5 1 1 0 3 2 2 0 0 0 8 0 1 0 0 2 0 1 0 6 3 3 3 7 3 3 2 2 0

|f\_

\_cl

ost

. . . . .  
2 8 7 4 2 7 9 5 3 6 2 2 1 0 1 1 9 5 1 2 2 7 4 5 7 2 0 3 3 3 5 7 0 4  
8 1 3 4 5 0 0 8 7 3 6 8 1 5 5 1 3 0 6 2 5 3 4 6 0 2 2 6 3 4 3 9 2 3

rid  
ia\_  
UCG  
-  
014  
\_un  
cla  
ssi  
fie  
d  
d\_\_  
Bac  
ter  
ia|  
p\_\_  
Fir  
mic  
ute  
s|c  
\_\_C  
los  
tri  
dia  
|o\_  
\_cl  
ost  
rid  
ia\_  
UCG  
-  
014  
|f\_  
\_cl  
ost  
rid  
ia\_  
UCG  
-  
014  
\_un  
cla  
ssi  
fie  
d|g

0 0 1 0 0 5 1 1 0 3 2 2 0 0 0 8 0 1 0 0 2 0 1 0 6 3 3 3 7 3 3 2 2 0  
.  
2 8 7 4 2 7 9 5 3 6 2 2 1 0 1 1 9 5 1 2 2 7 4 5 7 2 0 3 3 3 5 7 0 4  
8 1 3 4 5 0 0 8 7 3 6 8 1 5 5 1 3 0 6 2 5 3 4 6 0 2 2 6 3 4 3 9 2 3

\_\_C

los

tri

dia

\_UC

G-

014

\_un

cla

ssi

fie

d

d\_\_

Bac

ter

ia|

p\_\_

Fir

mic

ute

s|c

\_\_C

los

tri

dia

|o\_

\_Cl

ost

rid

ia\_

UCG

-

014

|f\_

\_cl

ost

rid

ia\_

UCG

-

014 0 0 1 0 0 5 1 1 0 3 2 2 0 0 0 8 0 1 0 0 2 0 1 0 6 3 3 3 7 3 3 2 2 0

\_un . . . . .

cla 2 8 7 4 2 7 9 5 3 6 2 2 1 0 1 1 9 5 1 2 2 7 4 5 7 2 0 3 3 3 5 7 0 4

ssi 8 1 3 4 5 0 0 8 7 3 6 8 1 5 5 1 3 0 6 2 5 3 4 6 0 2 2 6 3 4 3 9 2 3







|     |       |                           |           |           |               |
|-----|-------|---------------------------|-----------|-----------|---------------|
| Bac | . . . | . . . . .                 | . . . . . | . . . . . | . . . . .     |
| ter | 0 0 0 | 0 0 0 0 2 1 1 7 2 0 0 1 0 | 2 0 0 0   | 3 1       | 3 0 0 1 1 1 0 |
| ia  | 1 1 9 | 1 4 1 1 1 9 6 1 3 2 1 0 1 | 5 1 1 8   | 0 0       | 0 0 2 4 3 6 9 |

p\_\_

Fir

mic

ute

s|c

\_\_C

los

tri

dia

lo\_

\_Cl

ost

rid

ia\_

vad

inB

B60

\_gr

oup

|f\_

\_Cl

ost

rid

ia\_

vad

inB

B60

\_gr

oup

\_un

cla

ssi

fie

d|g

\_\_C

los

tri

dia

\_va

din

BB6

```

0_g
rou
p_u
ncl
ass
ifi
ed
d__
Bac
ter
ia|
p__
Fir
mic
ute
s|c
__C
los
tri
dia
|o_
_Cl
ost
rid
ia_
vad
inB
B60
_gr
oup
|f_
_Cl
ost
rid
ia_
vad
inB
B60
_gr
oup
_un 0 0 0   0 0 0 0 0 0 0 0 0 0 0 0 0 0 0 0   0 0 0 0   1 0   0 0 0 0 0 0 0 0
cla . . .   . . . . . . . . . . . . . . . . . . . .   . . . .   . .   . . . . . . . . . .
ssi 0 0 0   0 0 0 0 2 1 1 7 2 0 0 1 0   2 0 0 0   3 1   3 0 0 1 1 1 0
fie 1 1 9 0 1 4 1 1 1 9 6 1 3 2 1 0 1 0 0 5 1 1 8 0 0 0 0 0 0 2 4 3 6 9

```

```

d|g
__C
los
tri
dia
_va
din
BB6
0_g
rou
p_u
ncl
ass
ifi
ed|
s__
Clo
str
idi
a_v
adi
nBB
60_
gro
up_
unc
las
sif
ied
d__
Bac
ter
ia|
p__
Fir
mic
ute
s|c
__C
los      1  1  1  1  1
tri 0 0 8 1 7 9 9 9 3 4 3 8 7 7 4 4 5 1 5 8 2 4 2 0 6 4 1 4 3 2 4 0 5 1
dia . . . . .
|o_ 8 8 6 2 4 1 6 4 7 6 9 0 1 0 4 5 0 6 0 1 7 6 9 5 7 4 3 4 9 1 7 9 3 7
_Cl 9 1 9 9 8 6 2 3 8 9 4 2 5 5 4 7 1 6 8 3 5 1 7 4 7 7 8 9 9 3 6 1 3 8

```

ost  
rid  
ial  
es

d\_\_  
Bac  
ter  
ial

p\_\_  
Fir  
mic  
ute  
s|c  
\_\_C

los  
tri  
dia

lo\_  
\_Cl  
ost  
rid  
ial  
es|

f\_\_  
Cal  
ora  
mat

0

ora  
cea

.

0

0 0 0 0 1 0 0 0 0 0 0 0 0 0 0 0 0 0 0 0 0 0 0 0 0 0 0 0 0 0 0 0

d\_\_  
Bac  
ter  
ial

p\_\_  
Fir  
mic  
ute  
s|c  
\_\_C

los  
tri  
dia

0

.

0

lo\_

0 0 0 0 1 0 0 0 0 0 0 0 0 0 0 0 0 0 0 0 0 0 0 0 0 0 0 0 0 0 0 0







```

mic
ute
s|c
__C
los
tri
dia
|o_
_cl
ost
rid
ial
es|
f__
Chr
ist
ens
ene
lla
cea
elg
__C
hri
ste
nse
nel
lac
eae
_un
cla
ssi
fie
d
d__
Bac
ter
ial
p__
Fir
mic
ute           0 0
s|c           . .
__C           0 0
los 0 0 0 0 0 0 0 0 0 0 0 0 0 2 1 0 0 0 0 0 0 0 0 0 0 0 0 0 0 0 0 0 0 0 0 0

```

tri  
dia  
|o\_  
\_Cl  
ost  
rid  
ial  
es|  
f\_\_  
Chr  
ist  
ens  
ene  
lla  
cea  
e|g  
\_\_C  
hri  
ste  
nse  
nel  
lac  
eae  
\_un  
cla  
ssi  
fie  
d|s  
\_\_C  
hri  
ste  
nse  
nel  
lac  
eae  
\_un  
cla  
ssi  
fie  
d

d\_\_ 0 0 0 0 0 1 0 0 0 2 2 0 0 0 0 0 0 0 0 0 0 0 0 0 0 0 0 0 0 0 0 0 0 0 0 0 2 0 0  
Bac . . . . .  
ter 0 0 4 0 3 3 4 6 6 3 2 3 2 1 3 4 5 2 4 2 2 4 3 0 6 3 2 7 7 5 4 2 2 3  
ia| 2 9 0 4 1 7 5 8 9 0 9 5 8 9 0 2 8 2 0 1 3 0 9 3 8 8 5 8 4 7 1 8 2 4

p\_\_  
Fir  
mic  
ute  
s|c  
\_\_C  
los  
tri  
dia  
|o\_  
\_Cl  
ost  
rid  
ial  
es|  
f\_\_  
Clo  
str  
idi  
ace  
ae  
d\_\_  
Bac  
ter  
ia|  
p\_\_  
Fir  
mic  
ute  
s|c  
\_\_C  
los  
tri  
dia  
|o\_  
\_Cl  
ost  
rid  
ial  
es|  
f\_\_ 0  
Clo .  
str 0  
idi 0 0 0 0 0 0 0 0 0 0 0 0 0 1 0 0 0 0 0 0 0 0 0 0 0 0 0 0 0 0 0 0 0 0 0 0 0 0

```

ace
ae|
g__
But
yri
cic
occ
us
d__
Bac
ter
ial
p__
Fir
mic
ute
s|c
__C
los
tri
dia
lo_
 Cl
ost
rid
ial
es|
f__
Clo
str
idi
ace
ae|
g__
But
yri
cic
occ
us|
s__
unc             0
ult             .
ure             0
d_B 0 0 0 0 0 0 0 0 0 0 0 0 1 0 0 0 0 0 0 0 0 0 0 0 0 0 0 0 0 0 0 0 0 0

```

```

uty
ric
ico
ccu
s_s
p.
d__
Bac
ter
ial|
p__
Fir
mic
ute
s|c
__C
los
tri
dia
|o_
_cl
ost
rid
ial
es|
f__
Clo
str
idi
ace
ae|
g__
Can
did
atu
s_A
rth  0      0      0      0  0      0      0
rom  .      .      .      .  .      .      .
itu  0      0      0      0  0      0      0
s    0 1 0 0 0 0 2 0 0 0 0 1 0 0 0 0 0 2 0 0 0 0 0 0 0 0 0 0 1 0 0 0 1 0 0
d__  0      0      0      0  0      0      0
Bac  .      .      .      .  .      .      .
ter  0      0      0      0  0      0      0
ial| 0 1 0 0 0 0 2 0 0 0 0 1 0 0 0 0 0 2 0 0 0 0 0 0 0 0 0 0 1 0 0 0 1 0 0

```





los  
 tri  
 dia  
 |o\_  
 \_Cl  
 ost  
 rid  
 ial  
 es|  
 f\_\_  
 Clo  
 str  
 idi  
 ace  
 ae|  
 g\_\_  
 Clo  
 str  
 idi  
 ace  
 ae\_  
 unc  
 las  
 sif  
 ied  
 |s\_  
 \_Cl  
 ost  
 rid  
 iac  
 eae  
 \_un  
 cla  
 ssi  
 fie  
 d  
 d\_\_  
 Bac  
 ter  
 ia|

p\_\_ 0 0 0 0 0 1 0 0 0 2 2 0 0 0 0 0 0 0 0 0 0 0 0 0 0 0 0 0 0 0 0 0 0 0 2 0 0  
 Fir . . . . .  
 mic 0 0 4 0 2 3 4 6 6 2 2 3 2 1 2 3 5 1 4 2 1 2 3 0 6 3 1 7 7 5 3 2 1 3  
 ute 1 6 0 4 4 6 2 2 7 8 7 1 2 8 9 9 8 9 0 0 7 5 7 0 5 6 6 6 1 1 9 3 8 1



s|c  
\_\_C  
los  
tri  
dia  
|o\_  
\_Cl  
ost  
rid  
ial  
es|  
f\_\_  
Clo  
str  
idi  
ace  
ae|  
g\_\_  
Clo  
str  
idi  
um  
d\_\_  
Bac  
ter  
ia|  
p\_\_  
Fir  
mic  
ute  
s|c  
\_\_C  
los  
tri  
dia  
|o\_  
\_Cl  
ost  
rid  
ial

|     |       |                       |       |                                         |   |   |   |   |   |   |   |   |   |   |   |   |   |   |   |
|-----|-------|-----------------------|-------|-----------------------------------------|---|---|---|---|---|---|---|---|---|---|---|---|---|---|---|
| es  | 0 0   | 0 0 0 0 0 0 0 0 0 0   | 0 0   | 0 0 0 0 0 0 0 0 0 0 0 0 0 0 0 0 0 0 0 0 |   |   |   |   |   |   |   |   |   |   |   |   |   |   |   |
| f__ | .     | .                     | .     | .                                       | . | . | . | . | . | . | . | . | . | . | . | . | . | . | . |
| Clo | 0 0   | 0 0 0 0 0 0 0 0 0 0   | 0 0   | 0 0 0 0 1 0 0 0 0 0 0 0 0 0 0 0 0 0 0 0 |   |   |   |   |   |   |   |   |   |   |   |   |   |   |   |
| str | 1 2 0 | 1 5 1 1 3 2 2 2 2 4 0 | 1 2 0 | 2 1 1 5 4 1 1 3 2 7 1 2 4 2 3 4 1       |   |   |   |   |   |   |   |   |   |   |   |   |   |   |   |

```

idi
ace
ae|
g__
Clo
str
idi
um_
sen
su_
str
ict
o_1
d__
Bac
ter
ial
p__
Fir
mic
ute
s|c
__C
los
tri
dia
|o_
_cl
ost
rid
ial
es|
f__
Clo
str
idi
ace
ae|
g__
Clo
str 0 0   0 0 0 0 0 0 0 0 0 0   0 0   0 0 0 0 0 0 0 0 0 0 0 0 0 0 0 0 0
idi  . .   . . . . . . . . . .   . .   . . . . . . . . . . . . . . . .
um_ 0 0   0 0 0 0 0 0 0 0 0 0   0 0   0 0 0 0 1 0 0 0 0 0 0 0 0 0 0 0 0
sen 1 2 0 1 5 1 1 3 2 2 2 2 4 0 1 2 0 2 1 1 5 4 1 1 3 2 7 1 2 4 2 3 4 1

```





```

o_2
|s_
_c1
ost
rid
ium
_se
nsu
_st
ric
to_
2_u
ncl
ass
ifi
ed
d__
Bac
ter
ial
p__
Fir
mic
ute
s|c
__C
los
tri
dia
|o_
_c1
ost
rid
ial
es|
f__
Clo
str
idi
ace
ae|      0      0      0
g__      .      .      .
Clo      0      0      0
str 0 0 0 0 2 0 0 0 0 0 0 0 2 0 0 0 0 0 0 0 0 0 0 0 0 0 0 0 0 0 0 0 3 0 0 0 0 0 0 0

```

```

idi
um_
sen
su_
str
ict
o_8
d__
Bac
ter
ia|
p__
Fir
mic
ute
s|c
__C
los
tri
dia
|o_
_Cl
ost
rid
ial
es|
f__
Clo
str
idi
ace
ae|
g__
Clo
str
idi
um_
sen
su_
str
ict          0          0          0
o_8          .          .          .
|s_          0          0          0
_Cl 0 0 0 0 2 0 0 0 0 0 0 0 0 2 0 0 0 0 0 0 0 0 0 0 0 0 3 0 0 0 0 0 0 0

```

ost  
rid  
ium  
\_se  
nsu  
\_st  
ric  
to\_  
8\_u  
ncl  
ass  
ifi  
ed  
d\_\_  
Bac  
ter  
ial  
p\_\_  
Fir  
mic  
ute  
s|c  
\_\_C  
los  
tri  
dia  
|o\_  
\_Cl  
ost  
rid  
ial  
es|  
f\_\_  
Clo  
str  
idi  
ace  
ae|  
g\_\_  
Clo  
str  
idi  
um|  
s\_\_ 0 0 0 0 0 0 0 0 0 0 0 0 0 0 0 0 0 0 0 0 0 0 0 0 0 0 0 0 0 0 0 0 0 0 2 0 0 0 0 0 0 0 0 0 0 0 0 0 0 0 0 0 0 0 0 0

```

Clo
str
idi
um_
fus
ifo
rmi
s
d__
Bac
ter
ial
p__
Fir
mic
ute
s|c
__C
los
tri
dia
|o_
_c|
ost
rid
ial
es|
f__
Clo
str
idi
ace
ae|
g__
Clo
str
idi
um|
s__
Clo
str          0
idi          .
um_          0
sp. 0 0 0 0 0 2 0 0 0 0 0 0 0 0 0 0 0 0 0 0 0 0 0 0 0 0 0 0 0 0 0 0 0 0

```







```

lo_
_cl
ost
rid
ial
es|
f__
Clo
str
idi
ace
ae|
g__
Clo
str
idi
um|
s__
Clo
str
idi
um_
sp.
_BS
Y12
d__
Bac
ter
ia|
p__
Fir
mic
ute
s|c
__C
los
tri
dia
lo_
_cl
ost           0           0
rid           .           .
ial           0           0
es|  0 0 0 0 0 0 0 2 0 0 0 0 0 0 0 0 0 0 0 0 2 0 0 0 0 0 0 0 0 0 0 0 0 0 0 0 0 0 0 0 0 0 0 0 0 0 0 0

```

f\_\_  
Clo  
str  
idi  
ace  
ae|  
g\_\_  
Clo  
str  
idi  
um|  
s\_\_  
Clo  
str  
idi  
um\_  
sp.  
\_cl  
one  
-1  
d\_\_  
Bac  
ter  
ia|  
p\_\_  
Fir  
mic  
ute  
s|c  
\_\_C  
los  
tri  
dia  
lo\_  
\_cl  
ost  
rid  
ial  
es|  
f\_\_  
Clo            0    0 0 0 0 0 0 0 0 0 0    0 0 0 0 0 0    0    0 0    0 0 0 0 0  
str            .    . . . . . . . . . .    . . . . .    .    . .    . . . . .  
idi            0    0 0 0 0 0 0 0 0 0 0    0 1 0 1 0    1    0 0    0 1 0 0 1  
ace 0 0 6 0 3 7 2 9 2 2 6 1 4 3 0 8 2 2 4 2 0 5 0 0 3 2 0 1 4 2 4 5 0 0





```

um_
sp.
_cl
one
-40
d__
Bac
ter
ial
p__
Fir
mic
ute
s|c
__C
los
tri
dia
lo_
_cl
ost
rid
ial
es|
f__
Clo
str
idi
ace
ae|
g__
Clo
str
idi
um|
s__
Clo
str
idi
um_
sp.          0    0    0          0    0    0 0
_cl          .    .    .          .    .    . .
one          0    0    0          0    0    0 0
-49 0 0 0 0 0 1 0 0 4 0 8 0 0 0 0 0 1 0 0 0 2 0 0 0 5 3 0 0 0 0 0 0 0 0

```

d\_  
Bac  
ter  
ia|  
p\_  
Fir  
mic  
ute  
s|c  
\_\_C  
los  
tri  
dia  
|o\_  
\_Cl  
ost  
rid  
ial  
es|  
f\_  
Clo  
str  
idi  
ace  
ae|  
g\_  
Clo  
str  
idi  
um|  
s\_  
Clo  
str  
idi  
um\_  
sp.           0  
\_Cl           .  
one           0  
-7   0 0 0 0 0 0 1 0 0 0 0 0 0 0 0 0 0 0 0 0 0 0 0 0 0 0 0 0 0 0 0 0 0 0 0 0 0 0 0 0 0 0 0 0 0 0 0 0 0  
d\_  
Bac       0 0 0 0 0 0 0 0 1 0 0 0 0 0 0 0 0 0 0 0 0 0 0 0 0 0 0 0 0 0 0 0 0 0 0 0 0 0 0 0 0 0 0 0 0 0 0 0 0  
ter       . . . . . . . . . . . . . . . . . . . . . . . . . . . . . . . . . . . . . . . . . . . . . . . . . . . . . .  
ia|       1 0 0 0 0 0 0 1 1 0 0 0 0 0 1 1 0 1 0 1 1 1 1 0 0 0 0 0 1 1 2 0 0 0 0 0 0 0 0 0 0 0 0 0 0 0 0 0 0 0  
p\_  
0 0 3 2 1 5 1 1 4 0 1 5 7 5 3 2 3 6 5 3 0 0 5 0 5 2 3 9 5 0 3 7 2 2







```

lo_
_Cl
ost
rid
ial
es|
f__
Clo
str
idi
ace
ae|
g__
Clo
str
idi
um|
s__
Clo
str
idi
um_
sp.
_ID
6
d__
Bac
ter
ial
p__
Fir
mic
ute
s|c
__C
los
tri
dia
lo_
_Cl
ost          0      0  0      0          0 0      0  0 0 0      1 0 0
rid          .      .  .      .          . .      .  . . .      . . .
ial          0      2  0      0          0 1      0  6 2 2      1 0 2
es| 0 0 0 0 0 5 0 0 0 2 0 2 0 0 0 5 0 0 0 0 0 2 9 0 0 8 0 4 3 4 0 8 1 7

```

```

f__
Clo
str
idi
ace
ae|
g__
Clo
str
idi
um|
s__
Clo
str
idi
um_
sp.
_MK
11
d__
Bac
ter
ial|
p__
Fir
mic
ute
s|c
__C
los
tri
dia
|o_
_Cl
ost
rid
ial
es|
f__
Clo
str    0          0          0 0
idi    .          .          . .
ace    0          0          0 0
ae|    0 1 0 0 0 0 0 0 0 0 4 0 0 0 0 0 0 0 0 0 0 0 1 1 0 0 0 0 0 0 0 0 0 0

```



str  
 idi  
 um|  
 s\_\_  
 Clo  
 str  
 idi  
 um\_  
 sp.  
 \_ND  
 2  
 d\_\_  
 Bac  
 ter  
 ia|  
 p\_\_  
 Fir  
 mic  
 ute  
 s|c  
 \_\_C  
 los  
 tri  
 dia  
 lo\_  
 \_Cl  
 ost  
 rid  
 ial  
 es|  
 f\_\_  
 Clo  
 str  
 idi  
 ace  
 ae|  
 g\_\_  
 Clo  
 str  
 idi  
 um|

|                                                                     |                         |
|---------------------------------------------------------------------|-------------------------|
| 0 0 0 0 0 0 0 0 2 0 0 0 0 0 0 0 0 0                                 | 0 0 0 0 0 0 0 0 0 0 0 0 |
| . . . . .                                                           | . . . . .               |
| 0 0 0 0 3 2 1 4 0 9 2 0 0 0 1 2 0 0                                 | 0 2 1 0 0 1 1 2 4 0 0   |
| 0 0 9 2 3 3 6 7 2 4 3 0 1 0 7 1 1 4 1 0 0 0 0 0 1 0 7 3 7 4 1 9 5 1 |                         |



```

ute
s|c
__C
los
tri
dia
|o_
_cl
ost
rid
ial
es|
f__
Clo
str
idi
ace
ae|
g__
Mor
dav
ell
a|s
__M
ord
ave
lla
_sp
.
d__
Bac
ter
ia|
p__
Fir
mic
ute
s|c
__C
los
tri          0 0  0          0 0 0 0 0          0 0          0
dia          . .  .          . . . . .          . .          .
|o_          0 0  0          0 0 0 0 0          0 0          0
_cl 0 0 0 0 0 0 0 0 0 0 0 0 0 1 1 0 1 0 0 0 0 0 0 1 1 1 0 0 0 0 0 0 1 0 0 0 1

```





\_un  
 cul  
 tur  
 ed\_  
 Oxo  
 bac  
 ter  
 \_sp  
 .  
 d\_\_  
 Bac  
 ter  
 ia|  
 p\_\_  
 Fir  
 mic  
 ute  
 s|c  
 \_\_C  
 los  
 tri  
 dia  
 |o\_  
 \_Cl  
 ost  
 rid  
 ial  
 es|  
 f\_\_  
 Clo  
 str  
 idi  
 ale  
 s\_F  
 ami  
 ly\_  
 IV.

|     |   |   |   |   |   |   |   |   |   |   |   |   |   |   |   |   |   |   |   |   |   |   |   |   |   |   |   |   |   |   |   |   |   |   |
|-----|---|---|---|---|---|---|---|---|---|---|---|---|---|---|---|---|---|---|---|---|---|---|---|---|---|---|---|---|---|---|---|---|---|---|
| _In |   |   |   |   |   |   |   |   |   |   |   |   |   |   |   |   |   |   |   |   |   |   |   |   |   |   |   |   |   |   |   |   |   |   |
| cer | 0 | 0 | 0 | 0 | 0 | 0 | 0 | 0 | 0 | 0 | 0 | 0 | 0 | 0 | 1 | 0 | 0 | 0 | 0 | 0 | 0 | 0 |   |   |   |   |   |   |   |   |   |   |   |   |
| tae | . | . | . | . | . | . | . | . | . | . | . | . | . | . | . | . | . | . | . | . | . | . |   |   |   |   |   |   |   |   |   |   |   |   |
| _Se | 0 | 4 | 0 | 0 | 0 | 0 | 0 | 4 | 1 | 0 | 1 | 0 | 7 | 0 | 4 | 0 | 8 | 2 | 2 | 0 | 0 | 0 | 0 | 0 |   |   |   |   |   |   |   |   |   |   |
| dis | 0 | 1 | 2 | 3 | 9 | 1 | 0 | 3 | 1 | 4 | 9 | 2 | 9 | 3 | 9 | 5 | 7 | 5 | 5 | 9 | 0 | 5 | 2 | 5 | 1 | 0 | 1 | 0 | 0 | 0 | 1 | 7 | 2 |   |
| d__ | 0 | 0 | 0 | 0 | 0 | 0 | 0 | 0 | 0 | 0 | 0 | 0 | 0 | 0 | 0 | 0 | 1 | 0 | 0 | 0 | 0 | 0 | 0 | 0 | 0 | 0 | 0 | 0 | 0 | 0 | 0 | 0 | 0 |   |
| Bac | 0 | . | . | . | . | . | 0 | . | . | . | . | . | . | . | . | . | . | . | . | . | . | 0 | . | . | . | . | 0 | . | 0 | 0 | 0 | 0 | . | . |

|     |           |                             |         |   |       |
|-----|-----------|-----------------------------|---------|---|-------|
| ter | 0 4 0 0 0 | 0 0 4 1 0 1 0 7 0 4 0 8 2 2 | 0 0 0 0 | 0 | 0 6 0 |
| ia  | 1 2 3 9 1 | 3 1 4 9 2 9 3 9 5 7 5 5 5 9 | 5 2 5 1 | 1 | 1 7 2 |
| p__ |           |                             |         |   |       |
| Fir |           |                             |         |   |       |
| mic |           |                             |         |   |       |
| ute |           |                             |         |   |       |
| s c |           |                             |         |   |       |
| __C |           |                             |         |   |       |
| los |           |                             |         |   |       |
| tri |           |                             |         |   |       |
| dia |           |                             |         |   |       |
| lo_ |           |                             |         |   |       |
| _cl |           |                             |         |   |       |
| ost |           |                             |         |   |       |
| rid |           |                             |         |   |       |
| ial |           |                             |         |   |       |
| es  |           |                             |         |   |       |
| f__ |           |                             |         |   |       |
| Clo |           |                             |         |   |       |
| str |           |                             |         |   |       |
| idi |           |                             |         |   |       |
| ale |           |                             |         |   |       |
| s_F |           |                             |         |   |       |
| ami |           |                             |         |   |       |
| ly_ |           |                             |         |   |       |
| IV. |           |                             |         |   |       |
| _In |           |                             |         |   |       |
| cer |           |                             |         |   |       |
| tae |           |                             |         |   |       |
| _Se |           |                             |         |   |       |
| dis |           |                             |         |   |       |
| lg_ |           |                             |         |   |       |
| _cl |           |                             |         |   |       |
| ost |           |                             |         |   |       |
| rid |           |                             |         |   |       |
| ial |           |                             |         |   |       |
| es_ |           |                             |         |   |       |
| Fam |           |                             |         |   |       |
| ily |           |                             |         |   |       |
| _IV |           |                             |         |   |       |
| ._I |           |                             |         |   |       |
| nce |           |                             |         |   |       |
| rta |           |                             |         |   |       |
| e_S |           |                             |         |   |       |

edi  
 s\_u  
 ncl  
 ass  
 ifi  
 ed  
 d\_\_  
 Bac  
 ter  
 ial  
 p\_\_  
 Fir  
 mic  
 ute  
 s|c  
 \_\_C  
 los  
 tri  
 dia  
 lo\_  
 \_Cl  
 ost  
 rid  
 ial  
 es|  
 f\_\_  
 Clo  
 str  
 idi  
 ale  
 s\_F  
 ami  
 ly\_  
 IV.  
 \_In  
 cer  
 tae  
 \_Se  
 dis  
 lg\_  
 \_Cl  
 ost  
 rid  
 ial

|                                                                     |                               |           |   |       |
|---------------------------------------------------------------------|-------------------------------|-----------|---|-------|
| 0 0 0 0 0                                                           | 0 0 0 0 0 0 0 0 0 0 0 0 1 0 0 | 0 0 0 0 0 | 0 | 0 0 0 |
| . . . . .                                                           | . . . . .                     | . . . . . | . | . . . |
| 0 4 0 0 0                                                           | 0 0 4 1 0 1 0 7 0 4 0 8 2 2   | 0 0 0 0 0 | 0 | 0 6 0 |
| 0 1 2 3 9 1 0 3 1 4 9 2 9 3 9 5 7 5 5 5 9 0 5 2 5 1 0 1 0 0 0 1 7 2 |                               |           |   |       |

```

es_
Fam
ily
_IV
._I
nce
rta
e_S
edi
s_u
ncl
ass
ifi
ed|
s__
Clo
str
idi
ale
s_F
ami
ly_
IV.
_In
cer
tae
_Se
dis
_un
cla
ssi
fie
d
d__
Bac
ter
ial
p__
Fir
mic
ute      0 0 0 0 0 0 0      0 0      0 0  0 0 0 0 0 0 0 0
s|c      . . . . . . .      . .      . .  . . . . . . . .
__C      0 0 0 0 0 0 0      0 0      0 0  0 0 0 0 0 0 0 0
los 0 0 2 1 0 2 3 2 2 0 0 0 0 0 0 7 1 0 0 0 0 2 1 0 1 6 1 2 3 3 3 5 0 0

```

```

tri
dia
lo_
_cl
ost
rid
ial
es|
f__
Clo
str
idi
ale
s_F
ami
ly_
XII
I._
Inc
ert
ae_
Sed
is
d__
Bac
ter
ial|
p__
Fir
mic
ute
s|c
__C
los
tri
dia
lo_
_cl
ost
rid
ial      0 0 0 0 0 0 0      0 0      0 0  0 0 0 0 0 0 0 0
es|      . . . . . . .      . .      . .  . . . . . . . .
f__      0 0 0 0 0 0 0      0 0      0 0  0 0 0 0 0 0 0 0
Clo 0 0 2 1 0 2 3 2 2 0 0 0 0 0 0 7 1 0 0 0 0 2 1 0 1 6 1 2 3 3 3 5 0 0

```

```

str
idi
ale
s_F
ami
ly_
XII
I._
Inc
ert
ae_
Sed
is|
g__
Ana
ero
vor
ax
d__
Bac
ter
ial
p__
Fir
mic
ute
s|c
__C
los
tri
dia
|o_
_cl
ost
rid
ial
es|
f__
Clo
str
idi      0 0 0 0 0 0 0      0 0      0 0  0 0 0 0 0 0 0 0
ale      . . . . . . .      . .      . .  . . . . . . . .
s_F      0 0 0 0 0 0 0      0 0      0 0  0 0 0 0 0 0 0 0
ami 0 0 2 1 0 2 3 2 2 0 0 0 0 0 0 0 7 1 0 0 0 0 2 1 0 1 6 1 2 3 3 3 5 0 0

```







XII

I.\_

Inc

ert

ae\_

Sed

is|

g\_\_

Ihu

bac

ter

|s\_

\_Ih

uba

cte

r\_s

p.

d\_\_

Bac

ter

ia|

p\_\_

Fir

mic

ute

s|c

\_\_C

los

tri

dia

|o\_

\_Cl

ost

rid

ial

es|

f\_\_

Clo

str

idi

ale    0            0    0 0    0 0                    0    0    0 0 0    0    0

s\_F    .            .    . .    . .                    .    .    . . .    .    .

ami    0            0    0 0    6 0                    0    0    0 0 0    1    0

ly\_    0 1 0 0 0 2 0 1 9 0 3 3 0 0 0 0 0 0 0 0 0 0 0 0 0 5 0 0 3 0 0 4 1 1 0 0 0 3

XIV

.\_I  
nce  
rta  
e\_S  
edi  
s

d\_\_  
Bac  
ter  
ia|

p\_\_  
Fir  
mic  
ute  
s|c

\_\_C  
los  
tri  
dia

lo\_  
\_Cl  
ost  
rid  
ial  
es|

f\_\_  
Clo  
str  
idi  
ale  
s\_F  
ami

ly\_

XIV

.\_I  
nce  
rta  
e\_S  
edi

|     |   |   |     |         |             |   |     |       |      |   |
|-----|---|---|-----|---------|-------------|---|-----|-------|------|---|
| s g | 0 | 0 | 00  | 00      |             | 0 | 0   | 000   | 0    | 0 |
| __C | . | . | ..  | ..      |             | . | .   | ...   | .    | . |
| los | 0 | 0 | 00  | 60      |             | 0 | 0   | 000   | 1    | 0 |
| tri | 0 | 1 | 000 | 2019033 | 00000000000 | 5 | 003 | 00411 | 0003 |   |

```

dia
les
_Fa
mil
y_X
IV.
_In
cer
tae
_Se
dis
_un
cla
ssi
fie
d
d__
Bac
ter
ia|
p__
Fir
mic
ute
s|c
__C
los
tri
dia
|o_
_Cl
ost
rid
ial
es|
f__
Clo
str
idi
ale
s_F   0       0   0 0   0 0       0   0   0 0 0   0   0
ami   .       .   . .   . .       .   .   . . .   .   .
ly_   0       0   0 0   6 0       0   0   0 0 0   1   0
XIV  0 1 0 0 0 2 0 1 9 0 3 3 0 0 0 0 0 0 0 0 0 5 0 0 3 0 0 4 1 1 0 0 0 3

```

. \_I  
nce  
rta  
e\_S  
edi  
s|g  
\_\_C  
los  
tri  
dia  
les  
\_Fa  
mil  
y\_X  
IV.  
\_In  
cer  
tae  
\_Se  
dis  
\_un  
cla  
ssi  
fie  
d|s  
\_\_C  
los  
tri  
dia  
les  
\_Fa  
mil  
y\_X  
IV.  
\_In  
cer  
tae  
\_Se  
dis  
\_un  
cla  
ssi  
fie  
d

d\_\_  
Bac  
ter  
ia|  
p\_\_  
Fir  
mic  
ute  
s|c  
\_\_C  
los  
tri  
dia  
|o\_  
\_Cl  
ost  
rid  
ial  
es|  
f\_\_  
Clo  
str  
idi  
ale

s\_u 1  
ncl 0 0 1 0 1 5 3 7 0 0 3 0 5 5 2 1 0 0 0 5 0 2 1 0 1 1 0 1 1 0 1 2 0 0  
ass . . . . .  
ifi 2 0 1 3 7 5 7 8 6 2 5 9 8 4 2 7 9 5 4 4 6 6 1 1 4 0 3 2 4 4 4 5 5 6  
ed 3 3 3 0 4 4 2 7 8 6 3 3 4 0 8 6 0 1 2 2 6 4 8 1 7 9 3 0 1 9 1 5 8 1

d\_\_  
Bac  
ter  
ia|  
p\_\_  
Fir  
mic  
ute  
s|c  
\_\_C  
los  
tri  
dia  
|o\_  
\_Cl

1  
tri 0 0 1 0 1 5 3 7 0 0 3 0 5 5 2 1 0 0 0 5 0 2 1 0 1 1 0 1 1 0 1 2 0 0  
dia . . . . .  
|o\_ 2 0 1 3 7 5 7 8 6 2 5 9 8 4 2 7 9 5 4 4 6 6 1 1 4 0 3 2 4 4 4 5 5 6  
\_Cl 3 3 3 0 4 4 2 7 8 6 3 3 4 0 8 6 0 1 2 2 6 4 8 1 7 9 3 0 1 9 1 5 8 1

ost  
rid  
ial  
es|  
f\_\_  
Clo  
str  
idi  
ale  
s\_u  
ncl  
ass  
ifi  
ed|  
g\_\_  
Clo  
str  
idi  
ale  
s\_u  
ncl  
ass  
ifi  
ed  
d\_\_  
Bac  
ter  
ia|  
p\_\_  
Fir  
mic  
ute  
s|c  
\_\_C  
los  
tri  
dia  
|o\_  
\_Cl  
ost

1

|     |   |   |   |   |   |   |   |   |   |   |   |   |   |   |   |   |   |   |   |   |   |   |   |   |   |   |   |   |   |   |   |   |   |   |   |   |
|-----|---|---|---|---|---|---|---|---|---|---|---|---|---|---|---|---|---|---|---|---|---|---|---|---|---|---|---|---|---|---|---|---|---|---|---|---|
| rid | 0 | 0 | 1 | 0 | 1 | 5 | 3 | 7 | 0 | 0 | 3 | 0 | 5 | 5 | 2 | 1 | 0 | 0 | 0 | 5 | 0 | 2 | 1 | 0 | 1 | 1 | 0 | 1 | 1 | 0 | 1 | 2 | 0 | 0 |   |   |
| ial | . | . | . | . | . | . | . | . | . | . | . | . | . | . | . | . | . | . | . | . | . | . | . | . | . | . | . | . | . | . | . | . | . | . | . | . |
| es  | 2 | 0 | 1 | 3 | 7 | 5 | 7 | 8 | 6 | 2 | 5 | 9 | 8 | 4 | 2 | 7 | 9 | 5 | 4 | 4 | 6 | 6 | 1 | 1 | 4 | 0 | 3 | 2 | 4 | 4 | 4 | 5 | 5 | 6 |   |   |
| f__ | 3 | 3 | 3 | 0 | 4 | 4 | 2 | 7 | 8 | 6 | 3 | 3 | 4 | 0 | 8 | 6 | 0 | 1 | 2 | 2 | 6 | 4 | 8 | 1 | 7 | 9 | 3 | 0 | 1 | 9 | 1 | 5 | 8 | 1 |   |   |

```

Clo
str
idi
ale
s_u
ncl
ass
ifi
ed|
g__
Clo
str
idi
ale
s_u
ncl
ass
ifi
ed|
s__
Clo
str
idi
ale
s_u
ncl
ass
ifi
ed
d__
Bac
ter
ia|
p__
Fir
mic
ute
s|c
__C
los
tri      0  0  0  0  0  0      0 0 0 0      0 0      0
dia      .  .  .  .  .  .      . . . .      . .      .
|o_      0  0  0  0  0  0      0 0 0 0      0 0      0
_cl 0 0 4 0 3 0 1 0 0 0 1 0 2 0 0 0 1 1 2 0 0 0 0 0 0 0 1 2 0 0 0 1 0 0 0

```



```

ost
rid
ial
es|
f__
Eub
act
eri
ace
ae
d__
Bac
ter
ial|
p__
Fir
mic
ute
s|c
__C
los
tri
dia
|o_
_cl
ost
rid
ial
es|
f__
Eub
act
eri
ace
ae|
g__
Eub
act
eri
ace
ae_      0          0 0 0 0          0      0
unc      .          . . . .          .      .
las      0          0 0 0 0          0      0
sif 0 0 3 0 0 0 0 0 0 0 0 0 0 0 0 0 0 0 1 1 2 0 0 0 0 0 0 0 1 0 0 0 0 0 1 0 0 0

```

```

ied
d__
Bac
ter
ia|
p__
Fir
mic
ute
s|c
__C
los
tri
dia
|o_
__Cl
ost
rid
ial
es|
f__
Eub
act
eri
ace
ae|
g__
Eub
act
eri
ace
ae_
unc
las
sif
ied
|s_
__Eu
bac
ter
iac      0          0 0 0 0          0      0
eae      .          . . . .          .      .
_un      0          0 0 0 0          0      0
cla 0 0 3 0 0 0 0 0 0 0 0 0 0 0 0 0 0 0 0 0 0 0 1 0 0 0 0 0 0 0 0 0 1 0 0 0 0 0 1 0 0 0

```



```

tri
dia
|o_
 _Cl
ost
rid
ial
es|
f__
Eub
act
eri
ace
ae|
g__
Eub
act
eri
um|
s__
Eub
act
eri
um_
ple
xic
aud
atu
m
d__
Bac
ter
ia|
p__
Fir
mic
ute
s|c
 __C
los
tri      0      0      0
dia      .      .      .
|o_      0      0      0
 _Cl 0 0 0 0 3 0 0 0 0 0 0 0 2 0 0 0 0 0 0 0 0 0 0 0 0 0 0 0 2 0 0 0 0 0 0 0

```



f\_\_  
Eub  
act  
eri  
ace  
ae|  
g\_\_  
Gar  
cie  
lla  
d\_\_  
Bac  
ter  
ia|  
p\_\_  
Fir  
mic  
ute  
s|c  
\_\_c  
los  
tri  
dia  
|o\_  
\_cl  
ost  
rid  
ial  
es|  
f\_\_  
Eub  
act  
eri  
ace  
ae|  
g\_\_  
Gar  
cie  
lla  
|s\_  
\_un  
cul  
tur  
ed\_

0  
.  
0  
0 0 1 0 0 0 0 0 0 0 0 0 0 0 0 0 0 0 0 0 0 0 0 0 0 0 0 0 0 0 0 0











ute  
s|c  
\_\_C  
los  
tri  
dia  
|o\_  
\_cl  
ost  
rid  
ial  
es|  
f\_\_  
Hun  
gat  
eic  
los  
tri  
dia  
cea  
e|g  
\_\_S  
acc  
har  
ofe  
rme  
nta  
ns|  
s\_\_  
unc  
ult  
ure  
d\_s  
acc  
har  
ofe  
rme  
nta  
ns\_  
sp.

|     |   |   |   |   |   |   |   |   |   |   |   |   |   |   |   |   |   |   |   |   |   |   |   |   |   |   |   |   |   |   |   |   |   |   |   |   |
|-----|---|---|---|---|---|---|---|---|---|---|---|---|---|---|---|---|---|---|---|---|---|---|---|---|---|---|---|---|---|---|---|---|---|---|---|---|
| d__ | 0 | 0 | 5 | 0 | 5 | 1 | 5 | 1 | 1 | 1 | 6 | 6 | 0 | 1 | 0 | 1 | 2 | 0 | 1 | 1 | 1 | 1 | 1 | 0 | 0 | 3 | 2 | 0 | 1 | 1 | 0 | 2 | 4 | 3 | 0 |   |
| Bac | . | . | . | . | 1 | . | 0 | . | . | . | . | . | . | . | . | . | . | . | . | . | . | . | . | . | . | . | . | . | . | . | . | . | . | . | . | . |
| ter | 5 | 5 | 8 | 7 | 1 | . | 1 | . | 9 | 5 | 4 | 1 | 7 | 3 | 9 | 5 | 7 | 7 | 9 | 6 | 3 | 4 | 8 | 2 | 2 | 3 | 6 | 8 | 4 | 8 | 2 | 6 | 6 | 6 |   |   |
| ia  | 9 | 9 | 8 | 1 | 6 | 3 | 1 | 4 | 6 | 9 | 0 | 0 | 9 | 3 | 6 | 3 | 4 | 0 | 8 | 8 | 7 | 5 | 3 | 1 | 1 | 7 | 9 | 4 | 1 | 2 | 0 | 6 | 3 | 3 |   |   |

p\_\_  
 Fir  
 mic  
 ute  
 s|c  
 \_\_C  
 los  
 tri  
 dia  
 |o\_  
 \_Cl  
 ost  
 rid  
 ial  
 es|  
 f\_\_  
 Lac  
 hno  
 spi  
 rac  
 eae  
 d\_\_  
 Bac  
 ter  
 ia|  
 p\_\_  
 Fir  
 mic  
 ute  
 s|c  
 \_\_C  
 los  
 tri  
 dia  
 |o\_  
 \_Cl  
 ost  
 rid  
 ial  
 es|  
 f\_\_    0 0 0 0 0 0 0 0 0    0 0    0 0    0    0 0    0 0    0    0 0 0  
 Lac    . . . . . . . . .    . .    . .    .    . .    . .    .    . . .  
 hno    0 0 0 0 0 0 0 0 0    1 0    0 0    0    0 0    0 0    0    0 0 0  
 spi    0 0 6 1 1 3 1 8 4 0 6 1 0 0 3 2 0 0 0 5 0 2 1 0 0 3 1 0 5 0 3 8 1 0

rac  
 eae  
 lg\_  
 \_Ac  
 eta  
 tif  
 act  
 or  
 d\_\_  
 Bac  
 ter  
 ial  
 p\_\_  
 Fir  
 mic  
 ute  
 s|c  
 \_\_C  
 los  
 tri  
 dia  
 lo\_  
 \_Cl  
 ost  
 rid  
 ial  
 es|  
 f\_\_  
 Lac  
 hno  
 spi  
 rac  
 eae  
 lg\_  
 \_Ac  
 eta  
 tif  
 act  
 or|  
 s\_\_

|     |   |   |   |   |   |   |   |   |   |   |   |   |   |   |   |   |   |   |   |   |   |   |   |   |   |   |   |   |   |   |   |   |   |   |
|-----|---|---|---|---|---|---|---|---|---|---|---|---|---|---|---|---|---|---|---|---|---|---|---|---|---|---|---|---|---|---|---|---|---|---|
| Ace | 0 | 0 | 0 | 0 | 0 | 0 | 0 | 0 | 0 | 0 | 0 | 0 | 0 | 0 | 0 | 0 | 0 | 0 | 0 |   |   |   |   |   |   |   |   |   |   |   |   |   |   |   |
| tat | . | . | . | . | . | . | . | . | . | . | . | . | . | . | . | . | . | . | . |   |   |   |   |   |   |   |   |   |   |   |   |   |   |   |
| ifa | 0 | 0 | 0 | 0 | 0 | 0 | 0 | 0 | 0 | 1 | 0 | 0 | 0 | 0 | 0 | 0 | 0 | 0 | 0 |   |   |   |   |   |   |   |   |   |   |   |   |   |   |   |
| cto | 0 | 0 | 6 | 1 | 1 | 3 | 1 | 8 | 4 | 0 | 6 | 1 | 0 | 0 | 3 | 2 | 0 | 0 | 0 | 5 | 0 | 2 | 1 | 0 | 0 | 3 | 1 | 0 | 5 | 0 | 3 | 8 | 1 | 0 |



dia  
|o\_  
\_Cl  
ost  
rid  
ial  
es|  
f\_\_  
Lac  
hno  
spi  
rac  
eae  
|g\_  
\_An  
aer  
obi  
um|  
s\_\_  
Ana  
ero  
biu  
m\_s  
p.  
d\_\_  
Bac  
ter  
ia|  
p\_\_  
Fir  
mic  
ute  
s|c  
\_\_C  
los  
tri  
dia  
|o\_  
\_Cl  
ost  
rid  
ial  
es|  
f\_\_

0  
.  
1  
000000000000000000000000000000000000000000000100







```

p__
Fir
mic
ute
s|c
__C
los
tri
dia
|o_
_cl
ost
rid
ial
es|
f__
Lac
hno
spi
rac
eae
|g_
_An
aer
ost
ipe
s|s
__A
nae
ros
tip
es_
rha
mno
siv
ora
ns
d__
Bac
ter
ia|           0 0       0   0 0       0 0           0
p__           . .       .   . .       . .           .
Fir           0 0       0   0 0       1 0           0
mic 0 0 0 0 0 0 0 4 1 0 0 1 0 8 6 0 0 0 0 4 1 0 0 0 0 0 0 0 0 0 0 0 0 0 0 0 0 0 1 0 0

```





ial  
 es|  
 f\_\_  
 Lac  
 hno  
 spi  
 rac  
 eae  
 lg\_  
 \_An  
 aer  
 ota  
 eni  
 a  
 d\_\_  
 Bac  
 ter  
 ial|  
 p\_\_  
 Fir  
 mic  
 ute  
 s|c  
 \_\_C  
 los  
 tri  
 dia  
 lo\_  
 \_Cl  
 ost  
 rid  
 ial  
 es|  
 f\_\_  
 Lac  
 hno  
 spi  
 rac  
 eae  
 lg\_  
 \_An               0               0               0  
 aer               .               .               .  
 ota               0               0               0  
 eni  0 0 0 0 0 0 0 0 0 0 0 3 0 0 0 0 0 0 0 0 0 0 0 0 0 0 0 5 0 0 0 0 0 0 0 0

a|s

A

nae

rot

aen

ia\_

tor

ta

d\_\_

Bac

ter

ia|

p\_\_

Fir

mic

ute

s|c

C

los

tri

dia

lo\_

\_cl

ost

rid

ial

es|

f\_\_

Lac

hno

spi

rac

eae

lg\_

An

aer 0 0 0 0 0 0 0 1 0 0 1 0 0 0 0 0 0 0 0 0 0 0 0 0 0 0 0 0 0 0 0 0 0 0 0 0

oti . . . . .

gnu 1 1 6 2 2 8 7 6 7 1 9 6 0 2 1 1 2 1 2 0 2 0 1 0 2 1 0 4 1 0 2 5 1 1

m 7 2 1 5 4 2 6 8 3 7 9 1 5 1 4 7 4 2 0 7 8 4 1 3 8 9 5 7 3 8 8 3 8 2

d\_\_

Bac 0 0 0 0 0 0 0 1 0 0 1 0 0 0 0 0 0 0 0 0 0 0 0 0 0 0 0 0 0 0 0 0 0 0 0 0

ter . . . . .

ia| 1 1 6 2 2 8 7 6 7 1 9 6 0 2 1 1 2 1 2 0 2 0 1 0 2 1 0 4 1 0 2 5 1 1

p\_\_ 7 2 1 5 4 2 6 8 3 7 9 1 5 1 4 7 4 2 0 7 8 4 1 3 8 9 5 7 3 8 8 3 8 2

```

Fir
mic
ute
s|c
__C
los
tri
dia
lo_
_cl
ost
rid
ial
es|
f__
Lac
hno
spi
rac
eae
lg_
_An
aer
oti
gnu
m|s
__A
nae
rot
ign
um_
sp.
d__
Bac
ter
ia|
p__
Fir
mic
ute
s|c      0      0 0  0 0  0      0  0
__C      .      . .  . .  .      .  .
los      0      0 0  0 0  0      0  1
tri 0 0 0 0 0 2 0 0 0 1 1 0 2 0 0 1 0 0 0 0 0 0 0 0 0 0 0 0 0 0 0 0 0 0 0 1 0 2 0

```





```

aut
ia|
s__
Bla
uti
a_c
aec
imu
ris
d__
Bac
ter
ia|
p__
Fir
mic
ute
s|c
__C
los
tri
dia
|o_
_Cl
ost
rid
ial
es|
f__
Lac
hno
spi
rac
eae
|g_
_Bl
aut
ia|
s__
Bla
uti           0
a_s           .
chi           0
nki  0 0 0 0 0 0 0 0 0 0 0 1 0 0 0 0 0 0 0 0 0 0 0 0 0 0 0 0 0 0 0 0 0 0 0 0 0 0

```



```

__C
los
tri
dia
|o_
_cl
ost
rid
ial
es|
f__
Lac
hno
spi
rac
eae
|g_
_Bl
aut
ia|
s__
unc
ult
ure
d_B
lau
tia
_sp
.
d__
Bac
ter
ia|
p__
Fir
mic
ute
s|c
__C
los
tri      0  0      0 0      0      0
dia      .  .      . .      .      .
|o_      0  0      0 0      0      0
_cl 0 0 3 0 3 0 0 0 0 0 2 4 0 0 0 0 0 0 0 0 2 0 0 0 0 0 0 0 0 0 0 0

```

```

ost
rid
ial
es|
f__
Lac
hno
spi
rac
eae
lg_
_Co
pro
coc
cus
d__
Bac
ter
ia|
p__
Fir
mic
ute
s|c
__C
los
tri
dia
lo_
_Cl
ost
rid
ial
es|
f__
Lac
hno
spi
rac
eae
lg_      0  0      0      0
_Co      .  .      .      .
pro      0  0      0      0
coc 0 0 2 0 2 0 0 0 0 0 0 4 0 0 0 0 0 0 0 0 0 2 0 0 0 0 0 0 0 0 0 0 0 0 0 0 0 0

```







```

ial
es|
f__
Lac
hno
spi
rac
eae
lg_
_Do
rea
|s_
_un
cul
tur
ed_
Dor
ea_
sp.
d__
Bac
ter
ial|
p__
Fir
mic
ute
s|c
__C
los
tri
dia
|o_
_Cl
ost
rid
ial
es|
f__
Lac
hno      0      0      0      0 0      0 0      0      0      0 0      1 0 0 0 0 0 0 0      0
spi      .      .      .      . .      . .      .      .      . .      . . . . . . . .      .
rac      0      3      0      0 0      0 0      3      0      0 0      1 3 0 0 0 0 0 8      0
eae    0 0 3 0 0 4 0 5 0 1 6 0 1 4 0 8 0 1 0 0 0 1 7 0 7 2 2 1 6 1 1 1 0 4

```





```

.
d__
Bac
ter
ia|
p__
Fir
mic
ute
s|c
__C
los
tri
dia
|o_
_cl
ost
rid
ial
es|
f__
Lac
hno
spi
rac
eae
|g_
_Fu          0          0
sim          .          .
ona          0          0
s  0 0 0 0 0 0 0 0 2 0 0 0 0 0 0 0 0 0 0 0 1 0 0 0 0 0 0 0 0 0 0 0 0 0
d__
Bac
ter
ia|
p__
Fir
mic
ute
s|c
__C          0          0
los          .          .
tri          0          0
dia  0 0 0 0 0 0 0 0 2 0 0 0 0 0 0 0 0 0 0 0 1 0 0 0 0 0 0 0 0 0 0 0 0 0

```

```

lo_
_Cl
ost
rid
ial
es|
f__
Lac
hno
spi
rac
eae
lg_
_Fu
sim
ona
s|s
__F
usi
mon
as_
int
est
ini
d__
Bac
ter
ia|
p__
Fir
mic
ute
s|c
__C
los
tri
dia
lo_
_Cl
ost
rid        0        0
ial        .        .
es|        0        0
f__ 0 0 0 0 0 0 0 0 0 0 0 1 0 0 0 0 0 0 0 0 0 0 0 0 0 0 0 0 0 0 0 0 0 0 0 0 0 0 0 0

```





\_\_C  
los  
tri  
dia  
|o\_  
\_Cl  
ost  
rid  
ial  
es|  
f\_\_  
Lac  
hno  
spi  
rac  
eae  
|g\_  
\_Ki  
neo  
thr  
ix|  
s\_\_  
Kin  
eot  
hri  
x\_a  
lys  
oid  
es  
d\_\_  
Bac  
ter  
ia|  
p\_\_  
Fir  
mic  
ute  
s|c  
\_\_C  
los  
tri  
dia  
|o\_  
\_Cl

0 0 0 0 0 0 0 0 0 0 0 0 0 0 0 0 0 0 0 0  
.  
0 0 0 0 0 4 0 0 0 0 0 0 0 0 0 0 3 0 0 0 1 0 0 0  
0 0 0 0 0 4 3 1 1 2 1 0 5 3 5 1 0 0 0 8 0 7 1 0 1 5 0 6 0 0 0 5 3 1

ost  
rid  
ial  
es|  
f\_\_  
Lac  
hno  
spi  
rac  
eae  
lg\_  
\_Ki  
neo  
thr  
ix|  
s\_\_  
Kin  
eot  
hri  
x\_s  
p.  
d\_\_  
Bac  
ter  
ial  
p\_\_  
Fir  
mic  
ute  
s|c  
\_\_C  
los  
tri  
dia  
|o\_  
\_Cl  
ost  
rid  
ial  
es|  
f\_\_ 0 0 0 0 0 0 0 0 0 0 0 0 0 0 0 0 0 0 0 0 0 0  
Lac . . . . . . . . . . . . . . . . . . . . . . . . . . . .  
hno 0 0 0 1 0 0 0 7 1 0 0 0 0 0 1 0 0 0 0 0 0 0 0 0  
spi 2 0 5 2 9 1 6 4 0 0 2 0 7 2 3 2 4 0 2 1 3 2 2 0 4 0 0 5 0 0 2 6 2 1









d\_\_  
Bac  
ter  
ia|  
p\_\_  
Fir  
mic  
ute  
s|c  
\_\_C  
los  
tri  
dia  
|o\_  
\_\_cl  
ost  
rid  
ial  
es|  
f\_\_  
Lac  
hno  
spi  
rac  
eae  
|g\_  
\_\_La  
chn  
ocl  
ost  
rid  
ium  
|s\_  
\_\_La  
chn  
ocl  
ost  
rid  
ium                    0  
\_\_pa                    .  
cae                     0  
nse 0 0 0 0 0 0 0 1 0 0 0 0 0 0 0 0 0 0 0 0 0 0 0 0 0 0 0 0 0 0 0  
d\_\_ 0 0 0 0 0 0 0 0 0 0 0 0 0 0 0 0 0 0 0 0 0 0 0 0 0 0 0 0 0 0  
Bac . 0 . . . . . 0 0 . 0 . . . . . 0 . 0 . . . . 0 . 0 0 . 0 0 . . . .

```

ter 0 001007 1 00000 1 000 0 0 0000
ia| 2 529164 2 72324 2 322 4 4 1621
p__
Fir
mic
ute
s|c
__C
los
tri
dia
|o_
_cl
ost
rid
ial
es|
f__
Lac
hno
spi
rac
eae
|g_
_La
chn
ocl
ost
rid
ium
|s_
_La
chn
ocl
ost
rid
ium
_sp
.
d__
Bac           0 0           0           0 0
ter           .  .           .           . .
ia|           0 0           0           1 0
p__ 00000000000040000010000000000000001000000

```

Fir  
mic  
ute  
s|c  
\_\_C  
los  
tri  
dia  
lo\_  
\_Cl  
ost  
rid  
ial  
es|  
f\_\_  
Lac  
hno  
spi  
rac  
eae  
lg\_  
\_La  
chn  
osp  
ira  
d\_\_  
Bac  
ter  
ial  
p\_\_  
Fir  
mic  
ute  
s|c  
\_\_C  
los  
tri  
dia  
lo\_  
\_Cl

1

ost 0 0 4 0 4 0 4 6 1 1 3 5 0 0 0 0 2 0 1 1 1 0 0 0 1 1 0 1 1 0 1 2 2 0  
rid . . . . .  
ial 3 4 8 3 5 0 0 6 0 3 0 3 5 9 6 8 3 5 6 2 0 9 5 1 5 3 6 1 0 7 7 7 6 2  
es| 9 6 3 9 5 0 8 7 0 4 6 0 9 2 4 5 7 5 1 5 3 2 0 7 7 8 0 0 5 1 1 6 6 9

f\_\_  
Lac  
hno  
spi  
rac  
eae  
lg\_  
\_La  
chn  
osp  
ira  
cea  
e\_u  
ncl  
ass  
ifi  
ed  
d\_\_  
Bac  
ter  
ia|  
p\_\_  
Fir  
mic  
ute  
s|c  
\_\_C  
los  
tri  
dia  
|o\_  
\_Cl  
ost  
rid  
ial  
es|  
f\_\_  
Lac  
hno  
spi

1

rac 0 0 4 0 4 0 4 6 1 1 3 5 0 0 0 0 2 0 1 1 1 0 0 0 1 1 0 1 1 0 1 2 2 0  
eae . . . . .  
lg\_ 3 4 8 3 5 0 0 6 0 3 0 3 5 9 6 8 3 5 6 2 0 9 5 1 5 3 6 1 0 7 7 7 6 2  
\_La 9 6 3 9 5 0 8 7 0 4 6 0 9 2 4 5 7 5 1 5 3 2 0 7 7 8 0 0 5 1 1 6 6 9





















```

rac
eae
lg_
_Ps
eud
obu
tyr
ivi
bri
o|s
__u
ncu
ltu
red
_Ps
eud
obu
tyr
ivi
bri
o_s
p.
d__
Bac
ter
ia|
p__
Fir
mic
ute
s|c
__C
los
tri
dia
|o_
_Cl
ost
rid
ial
es|      0 0 0 0      0      0 0 0 0 0 0 0 0 0
f__      . . . .      .      . . . . . . . .
Lac      0 0 0 0      0      0 1 1 0 0 0 0 0 0 0
hno 0 0 0 0 0 3 3 5 0 0 0 0 0 0 0 0 1 0 0 0 0 0 0 2 0 3 0 1 2 4 0 1 8 0 0

```



```

spi
rac
eae
lg_
_Ro
bin
son
iel
la
d__
Bac
ter
ia|
p__
Fir
mic
ute
s|c
__C
los
tri
dia
|o_
_Cl
ost
rid
ial
es|
f__
Lac
hno
spi
rac
eae
lg_
_Ro
bin
son
iel
la|
s__      0 0 0      0      0 0 0 0 0 0 0 0
Rob      . . .      .      . . . . . . . .
ins      0 0 0      0      0 1 1 0 0 0 0 0 0 0
oni 0 0 0 0 0 3 2 3 0 0 0 0 0 0 0 1 0 0 0 0 0 0 2 0 2 0 1 2 2 0 1 8 0 0

```





```

|o_
_Cl
ost
rid
ial
es|
f__
Lac
hno
spi
rac
eae
lg_
_Ro
seb
uri
a|s
__R
ose
bur
ia_
sp.
d__
Bac
ter
ia|
p__
Fir
mic
ute
s|c
__C
los
tri
dia
|o_
_Cl
ost
rid
ial
es|             0       0       0       0       0
f__             .       .       .       .       .
Lac             0       0       0       0       0
hno 0 0 0 0 0 0 0 0 0 1 0 0 0 0 1 0 0 0 0 0 0 0 0 0 1 0 0 0 0 1 0 0 1 0 0

```



```

a|s
__R
ose
bur
ia_
sp.
_83
1b
d__
Bac
ter
ia|
p__
Fir
mic
ute
s|c
__C
los
tri
dia
|o_
_c1
ost
rid
ial
es|
f__
Lac
hno
spi
rac
eae
|g_
_Ro
seb
uri
a|s
__u
ncu
ltu      0 0 0  0 0          0      0      0 0 0 0 0
red      . . .  . .          .      .      . . . . .
_Ro      0 0 0  0 0          0      0      0 0 0 0 0
seb 0 0 0 0 0 1 3 1 0 1 4 0 0 0 0 0 0 0 0 0 0 0 1 0 0 0 0 0 0 1 1 1 1 1 0

```

```

uri
a_s
p.
d__
Bac
ter
ial
p__
Fir
mic
ute
s|c
__C
los
tri
dia
|o_
 Cl
ost
rid
ial
es|
f__
Lac
hno
spi
rac
eae
|g_
 Sh
utt          0          0
lew          .          .
ort          0          0
hia 0 0 0 0 0 0 0 0 0 0 0 0 0 0 0 0 0 0 0 0 0 0 0 0 0 0 0 0
d__
Bac
ter
ial
p__
Fir
mic          0          0
ute          .          .
s|c          0          0
__C 0 0 0 0 0 0 0 0 0 0 0 0 0 0 0 0 0 0 0 0 0 0 0 0 0 0 0 0

```

```

los
tri
dia
|o_
_Cl
ost
rid
ial
es|
f__
Lac
hno
spi
rac
eae
lg_
_Sh
utt
lew
ort
hia
|s_
_Sh
utt
lew
ort
hia
_sa
tel
les
d__
Bac
ter
ia|
p__
Fir
mic
ute
s|c
__C

```

```

los      0 0 0 0 0 0 0 0 0 0 0 0 0 0 0 0 0 0 0 0 0 0 0 0 0 0 0 0 0 0 0 0 0 0 0 0 0 0 0 0
tri      . . . . . . . . . . . . . . . . . . . . . . . . . . . . . . . . . . . .
dia      2 0 0 0 0 0 0 1 0 1 1 0 0 0 0 0 0 0 0 0 0 0 0 0 0 0 0 0 0 0 0 0 0 0 0 0 0 0
|o_    0 0 2 4 2 4 5 7 3 0 4 1 0 2 1 1 0 1 0 6 2 1 0 0 1 6 1 1 4 0 1 4 6 0

```





```

rel
la|
s__
Tyz
zer
ell
a_s
p.
d__
Bac
ter
ia|
p__
Fir
mic
ute
s|c
__C
los
tri
dia
|o_
_cl
ost
rid
ial
es|
f__
Osc
ill
osp      0 0  0 0 0 0  0  0 0 0  0 0  0 0 0 0 0 0 0 0 0 0 0 0
ira      . .  . . . .  .  . . .  . .  . . . . . . . . . . . .
cea      0 0  1 0 0 0  4  0 0 0  0 0  0 2 0 4 3 0 0 0 0 0 8 0 0
e  0 0 6 6 0 4 2 8 1 0 5 0 0 4 2 8 0 0 2 2 0 3 5 1 7 5 1 5 6 1 8 8 5 1
d__
Bac
ter
ia|
p__
Fir
mic      0 0  0 0 0 0  0  0 0 0  0 0  0 0 0 0 0 0 0 0 0 0 0 0
ute      . .  . . . .  .  . . .  . .  . . . . . . . . . . . .
s|c      0 0  1 0 0 0  4  0 0 0  0 0  0 2 0 4 3 0 0 0 0 0 8 0 0
__C  0 0 6 6 0 4 2 8 1 0 5 0 0 4 2 8 0 0 2 2 0 3 5 1 7 5 1 5 6 1 8 8 5 1

```

```

los
tri
dia
|o_
_Cl
ost
rid
ial
es|
f__
Osc
ill
osp
ira
cea
e|g
__O
sci
lli
bac
ter
d__
Bac
ter
ia|
p__
Fir
mic
ute
s|c
__C
los
tri
dia
|o_
_Cl
ost
rid
ial
es|
f__      0 0   0 0 0   0   0 0 0   0 0   0 0 0 0 0 0 0 0 0 0   0 0
Osc      . .   . . .   .   . . .   . .   . . . . . . . .   . .
ill      0 0   0 0 0   3   0 0 0   0 0   0 2 0 3 2 0 0 0   0 8
osp      0 0 2 1 0 8 1 2 0 0 8 0 0 2 1 5 0 0 2 2 0 3 3 1 8 8 1 4 3 0 3 1 0 0

```

```

ira
cea
elg
__O
sci
lli
bac
ter
|s_
_Os
cil
lib
act
er_
sp.
d__
Bac
ter
ia|
p__
Fir
mic
ute
s|c
__C
los
tri
dia
|o_
_cl
ost
rid
ial
es|
f__
Osc
ill
osp
ira
cea
elg      0 0   0 0 0 0   0   0 0 0   0   0 0 0 0 0 0   0 0 0 0 0 0 0 0
__O      . .   . . . .   .   . . .   .   . . . . . .   . . . . . . . .
sci      0 0   0 0 0 0   0   0 0 0   0   0 0 0 1 0   0 0 0 0 0 0 0 0
lli     0 0 4 5 0 6 1 6 1 0 7 0 0 2 1 3 0 0 1 0 0 1 2 1 0 7 0 1 3 1 5 7 5 1

```













|     |                                                                     |   |   |   |   |   |     |
|-----|---------------------------------------------------------------------|---|---|---|---|---|-----|
| ter | 0                                                                   | 0 | 0 | 0 | 0 | 0 | 0 0 |
| ial | 1                                                                   | 1 | 1 | 0 | 1 | 3 | 1 0 |
| p__ |                                                                     |   |   |   |   |   |     |
| Fir |                                                                     |   |   |   |   |   |     |
| mic |                                                                     |   |   |   |   |   |     |
| ute |                                                                     |   |   |   |   |   |     |
| s c |                                                                     |   |   |   |   |   |     |
| __C |                                                                     |   |   |   |   |   |     |
| los |                                                                     |   |   |   |   |   |     |
| tri |                                                                     |   |   |   |   |   |     |
| dia |                                                                     |   |   |   |   |   |     |
| lo_ |                                                                     |   |   |   |   |   |     |
| _cl |                                                                     |   |   |   |   |   |     |
| ost |                                                                     |   |   |   |   |   |     |
| rid |                                                                     |   |   |   |   |   |     |
| ial |                                                                     |   |   |   |   |   |     |
| es  |                                                                     |   |   |   |   |   |     |
| f__ |                                                                     |   |   |   |   |   |     |
| Rum |                                                                     |   |   |   |   |   |     |
| ino |                                                                     |   |   |   |   |   |     |
| coc |                                                                     |   |   |   |   |   |     |
| cac |                                                                     |   |   |   |   |   |     |
| eae |                                                                     |   |   |   |   |   |     |
| lg_ |                                                                     |   |   |   |   |   |     |
| _Ac |                                                                     |   |   |   |   |   |     |
| eti |                                                                     |   |   |   |   |   |     |
| vib |                                                                     |   |   |   |   |   |     |
| rio |                                                                     |   |   |   |   |   |     |
| d__ |                                                                     |   |   |   |   |   |     |
| Bac |                                                                     |   |   |   |   |   |     |
| ter |                                                                     |   |   |   |   |   |     |
| ial |                                                                     |   |   |   |   |   |     |
| p__ |                                                                     |   |   |   |   |   |     |
| Fir |                                                                     |   |   |   |   |   |     |
| mic |                                                                     |   |   |   |   |   |     |
| ute |                                                                     |   |   |   |   |   |     |
| s c |                                                                     |   |   |   |   |   |     |
| __C |                                                                     |   |   |   |   |   |     |
| los |                                                                     |   |   |   |   |   |     |
| tri |                                                                     |   |   |   |   |   |     |
| dia | 0                                                                   | 0 | 0 | 0 | 0 | 0 | 0 0 |
| lo_ | .                                                                   | . | . | . | . | . | . . |
| _cl | 0                                                                   | 0 | 0 | 0 | 0 | 0 | 0 0 |
| ost | 0 0 0 0 0 0 1 0 0 0 0 1 0 0 0 1 0 0 0 0 0 0 0 0 1 0 0 3 0 0 1 0 0 0 |   |   |   |   |   |     |











```

coc
cac
eae
lg_
_Et
han
oli
gen
ens
|s_
_un
cul
tur
ed_
Eth
ano
lig
ene
ns_
sp.
d__
Bac
ter
ia|
p__
Fir
mic
ute
s|c
__C
los
tri
dia
|o_
_cl
ost
rid
ial
es|
f__
Rum  0 0 0      0 0 0 0 0 0 0      0 0 0 0 0 0 0 0 0 0 0 0 0 0 0 0 0 0 0 0 0 0 0
ino  . . .      . . . . . . . . .      . . . . . . . . . . . . . . . . . . . . . . .
coc  0 0 0      1 1 0 1 0 1 3      3 0 0 2 0 0 0 1 0 3 0      3 0 0 1 1 0 0
cac  3 5 2 0 0 5 5 9 0 6 4 7 0 0 0 8 9 8 5 1 5 2 0 3 0 3 0 2 6 6 7 1 5 9

```



eae  
 |g\_  
 \_Fl  
 avo  
 nif  
 rac  
 tor  
 d\_\_  
 Bac  
 ter  
 ia|  
 p\_\_  
 Fir  
 mic  
 ute  
 s|c  
 \_\_C  
 los  
 tri  
 dia  
 |o\_  
 \_Cl  
 ost  
 rid  
 ial  
 es|  
 f\_\_  
 Rum  
 ino  
 coc  
 cac  
 eae  
 |g\_  
 \_Fl  
 avo  
 nif  
 rac  
 tor  
 |s\_  
 \_Fl  
 avo  
 nif  
 rac  
 tor

|     |           |                     |                         |               |
|-----|-----------|---------------------|-------------------------|---------------|
| avo | 0 0 0     | 0 0 0 0 0 0 0       | 0 0 0 0 0 0 0 0 0 0 0 0 | 0 0 0 0 0 0 0 |
| nif | . . .     | . . . . .           | . . . . .               | . . . . .     |
| rac | 0 0 0     | 1 1 0 1 0 1 3       | 3 0 0 2 0 0 0 1 0 3 0   | 3 0 0 1 1 0 0 |
| tor | 3 5 2 0 0 | 5 5 8 0 6 4 7 0 0 0 | 8 9 8 5 1 5 2 0 3 0 2 0 | 2 6 5 7 1 5 9 |



```

d__
Bac
ter
ia|
p__
Fir
mic
ute
s|c
__C
los
tri
dia
|o_
_cl
ost
rid
ial
es|
f__
Rum
ino
coc
cac
eae
lg_
_Ha
rry    0          0          0          0 0 0    0
fli    .          .          .          . .    .
nti    0          0          0          0 0    0
a      0 0 2 0 0 0 0 0 0 0 1 0 0 0 0 0 0 0 0 0 1 0 0 0 0 0 0 0 0 0 1 1 0 0 1 0 0

```

```

d__
Bac
ter
ia|
p__
Fir
mic
ute
s|c
__C    0          0          0          0 0    0
los    .          .          .          . .    .
tri    0          0          0          0 0    0
dia    0 0 2 0 0 0 0 0 0 0 1 0 0 0 0 0 0 0 0 0 1 0 0 0 0 0 0 0 0 0 1 1 0 0 1 0 0

```









```

Bac      .
ter      0          .      . .      .      .      .      .
ia|      1          1      0 0      0      0      0      0
p__
Fir
mic
ute
s|c
__C
los
tri
dia
|o_
_Cl
ost
rid
ial
es|
f__
Rum
ino
coc
cac
eae
lg_
_Os
cil
los
pir
a
d__
Bac
ter
ia|
p__
Fir
mic
ute
s|c
__C
los      0          0      0 0      0      0      0      0
tri      .          .      . .      .      .      .      .
dia      0          0      0 0      0      0      0      0
|o_     0 0 1 0 0 0 0 0 0 0 0 0 0 0 0 0 1 0 0 3 1 0 0 0 0 2 0 0 2 0 1 0 1 0 0

```









nif  
rac  
tor  
d\_\_  
Bac  
ter  
ial  
p\_\_  
Fir  
mic  
ute  
s|c  
\_\_C  
los  
tri  
dia  
|o\_  
\_\_Cl  
ost  
rid  
ial  
es|  
f\_\_  
Rum  
ino  
coc  
cac  
eae  
|g\_  
\_\_Ps  
eud  
ofl  
avo  
nif  
rac  
tor  
|s\_  
\_\_Ps  
eud  
ofl

|     |                                                                     |               |     |       |   |       |           |
|-----|---------------------------------------------------------------------|---------------|-----|-------|---|-------|-----------|
| avo | 0 0                                                                 | 0 0 0 0 0 0 0 | 0 0 | 0 0 0 | 0 | 0 0 0 | 0 0 0 0 0 |
| nif | .                                                                   | .             | .   | .     | . | .     | .         |
| rac | 0 0                                                                 | 0 0 0 0 0 0 0 | 0 0 | 0 0 0 | 0 | 0 0 0 | 0 0 0 0 0 |
| tor | 1 2 0 1 1 4 1 4 3 1 0 0 1 0 0 2 1 1 0 0 0 0 0 1 0 0 2 2 0 2 3 4 1 1 |               |     |       |   |       |           |

\_ph  
 oca  
 een  
 sis  
 d\_\_  
 Bac  
 ter  
 ia|  
 p\_\_  
 Fir  
 mic  
 ute  
 s|c  
 \_\_C  
 los  
 tri  
 dia  
 |o\_  
 \_Cl  
 ost  
 rid  
 ial  
 es|  
 f\_\_  
 Rum  
 ino  
 coc  
 cac  
 eae  
 |g\_  
 \_Ps  
 eud  
 ofl  
 avo  
 nif  
 rac  
 tor  
 |s\_  
 \_Ps  
 eud

|     |   |   |   |   |   |   |   |   |   |   |   |   |   |   |   |   |   |   |   |   |   |   |   |   |   |   |   |   |   |   |   |   |   |   |   |
|-----|---|---|---|---|---|---|---|---|---|---|---|---|---|---|---|---|---|---|---|---|---|---|---|---|---|---|---|---|---|---|---|---|---|---|---|
| ofl | 0 | 0 | 0 | 0 | 0 | 0 | 0 | 0 | 0 | 0 | 0 | 0 | 0 | 0 | 0 | 0 | 0 | 0 | 0 |   |   |   |   |   |   |   |   |   |   |   |   |   |   |   |   |
| avo | . | . | . | . | . | . | . | . | . | . | . | . | . | . | . | . | . | . | . |   |   |   |   |   |   |   |   |   |   |   |   |   |   |   |   |
| nif | 0 | 4 | 0 | 0 | 0 | 0 | 0 | 0 | 0 | 1 | 0 | 1 | 1 | 0 | 0 | 0 | 0 | 0 | 0 |   |   |   |   |   |   |   |   |   |   |   |   |   |   |   |   |
| rac | 0 | 2 | 5 | 6 | 7 | 0 | 0 | 1 | 9 | 0 | 4 | 5 | 0 | 3 | 3 | 2 | 4 | 2 | 0 | 5 | 1 | 0 | 2 | 6 | 4 | 3 | 0 | 2 | 2 | 0 | 0 | 0 | 0 | 0 | 0 |

tor  
\_sp  
.d\_\_  
Bac  
ter  
ial  
p\_\_  
Fir  
mic  
ute  
s|c  
\_\_C  
los  
tri  
dia  
|o\_  
\_Cl  
ost  
rid  
ial  
es|  
f\_\_  
Rum  
ino  
coc  
cac  
eae  
|g\_  
\_Ps  
eud  
ofl  
avo  
nif  
rac  
tor  
|s\_  
\_Ps  
eud  
ofl  
avo                    0                    0  
nif                    .                    .  
rac                    0                    0  
tor 0 0 0 0 0 0 0 0 0 0 0 0 0 1 0 0 0 0 0 0 0 1 0 0 0 0 0 0 0 0 0 0 0 0 0 0 0 0 0 0 0 0 0 0 0 0 0 0 0 0



ed\_  
Pse  
udo  
fla  
von  
ifr  
act  
or\_  
sp.  
d\_  
Bac  
ter  
ia|  
p\_  
Fir  
mic  
ute  
s|c  
\_C  
los  
tri  
dia  
|o\_  
\_Cl  
ost  
rid  
ial  
es|  
f\_  
Rum  
ino  
coc  
cac  
eae  
|g\_  
\_Ru  
min  
oco  
cca  
cea

e\_u 0 0 0 0 0 0 0 0 0 0 0 0 0 0 0 0 0 0 0 0 0 0 0 0 0 0 0 0 0 0 0 0 0 0 0 0  
ncl . . . . .  
ass 0 0 2 0 0 2 0 0 0 0 1 1 0 0 0 1 0 0 0 3 0 0 0 0 3 0 0 1 1 0 1 1 1 0  
ifi 1 0 0 5 7 9 8 9 4 4 3 2 2 2 5 4 5 4 7 6 4 0 7 4 3 5 5 4 5 6 8 7 0 3



ed  
 d\_\_  
 Bac  
 ter  
 ia|  
 p\_\_  
 Fir  
 mic  
 ute  
 s|c  
 \_\_C  
 los  
 tri  
 dia  
 |o\_  
 \_Cl  
 ost  
 rid  
 ial  
 es|  
 f\_\_  
 Rum  
 ino  
 coc  
 cac  
 eae  
 |g\_  
 \_Ru  
 min  
 oco  
 cca  
 cea  
 e\_u  
 ncl  
 ass  
 ifi  
 ed|  
 s\_\_  
 Rum  
 ino  
 coc  
 cac  
 eae  
 \_un

0 0 0 0 0 0 0 0 0 0 0 0 0 0 0 0 0 0 0 0 0 0 0 0 0 0 0 0 0 0 0 0  
 . . . . . . . . . . . . . . . . . . . . . . . . . . . . . . . . . . . .  
 0 0 2 0 0 2 0 0 0 0 1 1 0 0 0 1 0 0 0 3 0 0 0 0 3 0 0 1 1 0 1 1 1 0  
 1 0 0 5 7 9 8 9 4 4 3 2 2 2 5 4 5 4 7 6 4 0 7 4 3 5 5 4 5 6 8 7 0 3



\_\_C  
 los  
 tri  
 dia  
 |o\_  
 \_Cl  
 ost  
 rid  
 ial  
 es|  
 f\_\_  
 Rum  
 ino  
 coc  
 cac  
 eae  
 |g\_  
 \_Ru  
 min  
 oco  
 ccu  
 s|s  
 \_\_R  
 umi  
 noc  
 occ  
 us\_  
 alb  
 us  
 d\_\_  
 Bac  
 ter  
 ia|  
 p\_\_  
 Fir  
 mic  
 ute  
 s|c  
 \_\_C  
 los  
 tri  
 dia  
 |o\_  
 \_Cl

|                                                                       |                 |     |             |               |
|-----------------------------------------------------------------------|-----------------|-----|-------------|---------------|
| 0 0                                                                   | 0 0 0 0 0 0 0 0 | 0 0 | 0 0 0 0 0 0 | 0 0 0 0 0 0 0 |
| . .                                                                   | . . . . . . . . | . . | . . . . . . | . . . . . .   |
| 0 0                                                                   | 1 0 0 0 0 0 0 0 | 0 0 | 0 0 0 0 0 0 | 0 0 0 0 0 0   |
| 0 0 4 1 0 0 1 3 5 0 9 3 0 0 0 5 0 2 0 0 0 0 0 7 1 0 4 0 0 3 3 4 2 1 2 |                 |     |             |               |

```

ost
rid
ial
es|
f__
Rum
ino
coc
cac
eae
lg_
_Ru
min
oco
ccu
s|s
__u
ncu
ltu
red
_Ru
min
oco
ccu
s_s
p.
d__
Bac
ter
ia|
p__
Fir
mic
ute
s|c
__C
los
tri
dia
lo_
_Cl      0      0      0 0 0      0      0 0      0      0
ost      .      .      . . .      .      . .      .      .
rid      0      0      0 0 0      0      0 0      0      0
ial 0 0 2 0 0 1 0 0 0 1 3 1 0 0 1 0 0 0 1 0 0 0 0 0 0 0 0 0 1 0 0 0 0 0 1 0 0

```

```

es|
f__
Rum
ino
coc
cac
eae
lg_
_Sp
oro
bac
ter
d__
Bac
ter
ia|
p__
Fir
mic
ute
s|c
__C
los
tri
dia
|o_
_Cl
ost
rid
ial
es|
f__
Rum
ino
coc
cac
eae
lg_
_Sp
oro
bac      0      0      0 0 0      0      0 0      0      0
ter      .      .      . . .      .      . .      .      .
|s_      0      0      0 0 0      0      0 0      0      0
_un 0 0 2 0 0 1 0 0 0 1 3 1 0 0 1 0 0 0 1 0 0 0 0 0 0 0 0 0 1 0 0 0 0 0 1 0 0

```

cul  
tur  
ed\_  
Spo  
rob  
act  
er\_  
sp.  
d\_  
Bac  
ter  
ial  
p\_  
Fir  
mic  
ute  
s|c  
\_\_C  
los  
tri  
dia  
|o\_  
\_Eu

|     |   |   |   |   |   |   |   |   |   |   |   |   |   |   |   |   |   |   |   |   |   |   |   |   |   |   |   |   |   |   |   |   |   |   |   |   |   |   |   |   |   |   |   |   |   |   |   |
|-----|---|---|---|---|---|---|---|---|---|---|---|---|---|---|---|---|---|---|---|---|---|---|---|---|---|---|---|---|---|---|---|---|---|---|---|---|---|---|---|---|---|---|---|---|---|---|---|
| bac | 0 | 0 |   |   |   |   |   |   |   |   |   |   |   |   |   |   |   |   |   |   |   |   |   |   |   |   |   |   |   |   |   |   |   |   |   |   |   |   |   |   |   |   | 0 | 0 |   |   |   |
| ter | . | . |   |   |   |   |   |   |   |   |   |   |   |   |   |   |   |   |   |   |   |   |   |   |   |   |   |   |   |   |   |   |   |   |   |   |   |   |   |   |   |   |   | . | . |   |   |
| ial | 0 | 0 |   |   |   |   |   |   |   |   |   |   |   |   |   |   |   |   |   |   |   |   |   |   |   |   |   |   |   |   |   |   |   |   |   |   |   |   |   |   |   |   | 0 | 0 |   |   |   |
| es  | 0 | 1 | 0 | 0 | 0 | 0 | 1 | 0 | 0 | 0 | 0 | 0 | 0 | 0 | 0 | 0 | 0 | 0 | 0 | 0 | 0 | 0 | 0 | 0 | 0 | 0 | 0 | 0 | 0 | 0 | 0 | 0 | 0 | 0 | 0 | 0 | 0 | 0 | 0 | 0 | 0 | 0 | 0 | 1 | 1 | 0 | 0 |

d\_  
Bac  
ter  
ial  
p\_  
Fir  
mic  
ute  
s|c  
\_\_C  
los  
tri  
dia

|     |   |   |   |   |   |   |   |   |   |   |   |   |   |   |   |   |   |   |   |   |   |   |   |   |   |   |   |   |   |   |   |   |   |   |   |   |   |   |   |   |   |   |   |   |   |   |   |   |   |   |   |
|-----|---|---|---|---|---|---|---|---|---|---|---|---|---|---|---|---|---|---|---|---|---|---|---|---|---|---|---|---|---|---|---|---|---|---|---|---|---|---|---|---|---|---|---|---|---|---|---|---|---|---|---|
| o_  | 0 | 0 |   |   |   |   |   |   |   |   |   |   |   |   |   |   |   |   |   |   |   |   |   |   |   |   |   |   |   |   |   |   |   |   |   |   |   |   |   |   |   |   |   |   |   |   | 0 | 0 |   |   |   |
| _Eu | . | . |   |   |   |   |   |   |   |   |   |   |   |   |   |   |   |   |   |   |   |   |   |   |   |   |   |   |   |   |   |   |   |   |   |   |   |   |   |   |   |   |   |   |   |   |   | . | . |   |   |
| bac | 0 | 0 |   |   |   |   |   |   |   |   |   |   |   |   |   |   |   |   |   |   |   |   |   |   |   |   |   |   |   |   |   |   |   |   |   |   |   |   |   |   |   |   |   |   |   |   | 0 | 0 |   |   |   |
| ter | 0 | 1 | 0 | 0 | 0 | 0 | 1 | 0 | 0 | 0 | 0 | 0 | 0 | 0 | 0 | 0 | 0 | 0 | 0 | 0 | 0 | 0 | 0 | 0 | 0 | 0 | 0 | 0 | 0 | 0 | 0 | 0 | 0 | 0 | 0 | 0 | 0 | 0 | 0 | 0 | 0 | 0 | 0 | 0 | 0 | 0 | 0 | 1 | 1 | 0 | 0 |



Fir  
 mic  
 ute  
 s|c  
 \_\_C  
 los  
 tri  
 dia  
 |o\_  
 \_Eu  
 bac  
 ter  
 ial  
 es|  
 f\_\_  
 Ana  
 ero  
 fus  
 tac  
 eae  
 |g\_  
 \_An  
 aer  
 ofu  
 sti  
 s|s  
 \_\_A  
 nae  
 rof  
 ust  
 is\_  
 unc  
 las  
 sif  
 ied  
 d\_\_  
 Bac  
 ter  
 ia|

|     |   |   |   |   |   |   |   |   |   |   |   |   |   |   |   |   |   |   |   |   |   |   |   |   |   |   |   |   |   |   |   |   |   |   |
|-----|---|---|---|---|---|---|---|---|---|---|---|---|---|---|---|---|---|---|---|---|---|---|---|---|---|---|---|---|---|---|---|---|---|---|
| p__ |   | 2 |   | 3 | 3 | 4 | 1 |   | 2 |   |   | 1 | 1 |   | 1 |   | 2 | 1 |   | 1 | 1 |   |   | 1 |   |   |   |   |   |   |   |   |   |   |
| Fir | 0 | 1 | 3 | 5 | 3 | 0 | 1 | 0 | 5 | 6 | 4 | 2 | 5 | 6 | 6 | 0 | 5 | 2 | 1 | 8 | 4 | 0 | 0 | 1 | 1 | 0 | 3 | 7 | 8 | 7 | 8 | 2 | 6 | 1 |
| mic | . | . | . | . | . | . | . | . | . | . | . | . | . | . | . | . | . | . | . | . | . | . | . | . | . | . | . | . | . | . | . | . | . | . |
| ute | 5 | 5 | 3 | 1 | 7 | 5 | 2 | 5 | 1 | 4 | 1 | 5 | 2 | 7 | 1 | 2 | 6 | 6 | 9 | 1 | 9 | 8 | 3 | 6 | 9 | 9 | 8 | 0 | 0 | 0 | 7 | 0 | 6 | 4 |
| s c | 1 | 2 | 2 | 9 | 3 | 9 | 8 | 3 | 7 | 5 | 2 | 4 | 3 | 0 | 7 | 7 | 1 | 7 | 9 | 3 | 8 | 8 | 4 | 2 | 8 | 2 | 5 | 6 | 0 | 9 | 0 | 4 | 4 | 4 |







osp  
ira  
les  
|f\_  
\_De  
flu  
vii  
tal  
eac  
eae  
lg\_  
\_De  
flu  
vii  
tal  
eac  
eae  
\_UC  
G-  
011  
|s\_  
\_De  
flu  
vii  
tal  
eac  
eae  
\_UC  
G-  
011  
\_un  
cla  
ssi  
fie  
d  
d\_  
Bac  
ter  
ia|

|     |   |   |   |   |   |   |   |   |   |   |   |   |   |   |   |   |   |   |   |   |   |   |   |   |   |   |   |   |   |   |   |   |   |   |   |
|-----|---|---|---|---|---|---|---|---|---|---|---|---|---|---|---|---|---|---|---|---|---|---|---|---|---|---|---|---|---|---|---|---|---|---|---|
| p__ |   | 2 |   | 3 | 3 | 4 | 1 |   | 2 |   |   | 1 | 1 |   | 1 |   | 2 | 1 |   | 1 | 1 |   |   |   | 1 |   |   |   |   |   |   |   |   |   |   |
| Fir | 0 | 1 | 3 | 5 | 3 | 0 | 1 | 0 | 5 | 6 | 4 | 2 | 5 | 6 | 6 | 0 | 5 | 2 | 1 | 8 | 4 | 0 | 0 | 1 | 1 | 0 | 3 | 7 | 8 | 7 | 8 | 2 | 6 | 1 |   |
| mic | . | . | . | . | . | . | . | . | . | . | . | . | . | . | . | . | . | . | . | . | . | . | . | . | . | . | . | . | . | . | . | . | . | . | . |
| ute | 5 | 5 | 3 | 1 | 7 | 5 | 2 | 5 | 1 | 4 | 1 | 5 | 2 | 7 | 1 | 2 | 6 | 6 | 9 | 1 | 9 | 8 | 3 | 6 | 9 | 9 | 8 | 0 | 0 | 0 | 7 | 0 | 6 | 4 |   |
| s c | 1 | 2 | 2 | 9 | 3 | 9 | 8 | 3 | 7 | 5 | 2 | 4 | 3 | 0 | 7 | 7 | 1 | 7 | 9 | 3 | 8 | 8 | 4 | 2 | 8 | 2 | 5 | 6 | 0 | 9 | 0 | 4 | 4 | 4 |   |

```

__C
los
tri
dia
|o_
_La
chn
osp
ira
les
|f_
_La
chn
osp
ira
cea
e
d__
Bac
ter
ia|
p__
Fir
mic
ute
s|c
__C
los
tri
dia
|o_
_La
chn
osp
ira
les
|f_
_La
chn
osp
ira          0  0    0 0  0          0 0 0 0 0  0 0 0 0    0 0
cea          .  .    . .  .          . . . . .  . . . .    . .
e|g          0  0    1 0  0          0 0 0 1 0  0 3 0 0    0 0
__A 0 0 0 0 0 1 0 9 0 0 5 8 0 0 0 0 0 0 0 0 1 1 3 2 1 0 5 0 2 1 0 0 5 2 0 0

```

2

d\_\_

Bac

ter

ia|

p\_\_

Fir

mic

ute

s|c

\_\_C

los

tri

dia

|o\_

\_La

chn

osp

ira

les

|f\_

\_La

chn

osp

ira

cea

e|g

\_\_A

2|s

\_\_A

2\_u

ncl

0 0 00 0 00000 0000 00

ass

. . . . . . . .

ifi

0 0 10 0 00010 0300 00

ed

0000010900580000001132105021005200

d\_\_

Bac

ter

ia|

p\_\_

Fir

0 0 0 00 0 00

mic

. . . . . . . .

ute

0 0 0 00 0 00

s|c

0000000000500000001010000000010630

```

__C
los
tri
dia
|o_
_La
chn
osp
ira
les
|f_
_La
chn
osp
ira
cea
e|g
__A
SF3
56
d__
Bac
ter
ia|
p__
Fir
mic
ute
s|c
__C
los
tri
dia
|o_
_La
chn
osp
ira
les
|f_
_La          0    0          0  0 0          0  0 0
chn          .    .          .  . .          .  . .
osp          0    0          0  0 0          0  0 0
ira 0 0 0 0 0 0 0 0 0 0 0 5 0 0 0 0 0 0 0 0 1 0 1 0 0 0 0 0 0 0 0 0 0 0 1 0 6 3 0

```









```

chn
osp
ira
les
|f_
_La
chn
osp
ira
cea
e|g
__A
cet
ito
mac
ulu
m|s
__A
cet
ito
mac
ulu
m_u
ncl
ass
ifi
ed
d__
Bac
ter
ia|
p__
Fir
mic
ute
s|c
__C
los
tri
dia
|o_          0      0 0      0
_La          .      . .      .
chn          0      0 0      0
osp 0 0 0 0 0 0 0 0 0 0 0 0 0 0 0 0 1 0 0 0 2 3 0 0 1 0 0 0 0 0 0 0 0 0 0 0

```

```

ira
les
|f_
_La
chn
osp
ira
cea
elg
__A
gat
hob
act
er
d__
Bac
ter
ia|
p__
Fir
mic
ute
s|c
__C
los
tri
dia
|o_
_La
chn
osp
ira
les
|f_
_La
chn
osp
ira
cea
elg
__A
gat
hob
act 0 0 0 0 0 0 0 0 0 0 0 0 0 0 0 0 1 0 0 0 2 3 0 0 1 0 0 0 0 0 0 0 0 0
    0      0 0      0
    .      . .      .
    0      0 0      0

```

```

er|
s__
Aga
tho
bac
ter
_un
cla
ssi
fie
d
d__
Bac
ter
ia|
p__
Fir
mic
ute
s|c
__C
los
tri
dia
|o_
_La
chn
osp
ira
les
|f_
_La
chn
osp
ira
cea
elg
__A
nae          0          0          0          0
ros          .          .          .          .
tip          0          2          1          0
es  0 0 0 0 0 0 1 0 0 0 0 1 0 0 0 0 4 0 0 0 0 0 0 2 0 0 0 0 0 0 0 0 0 0 0 0
d__          0          0          0          0
Bac  0 0 0 0 0 0 . 0 0 0 0 0 . 0 0 0 0 0 . 0 0 0 0 0 0 0 . 0 0 0 0 0 0 0 0 0 0 0

```

|     |   |   |   |   |
|-----|---|---|---|---|
| ter | 0 | 2 | 1 | 0 |
| ia  | 1 | 1 | 4 | 2 |

p\_\_  
 Fir  
 mic  
 ute  
 s|c  
 \_\_C  
 los  
 tri  
 dia  
 |o\_  
 \_La  
 chn  
 osp  
 ira  
 les  
 |f\_  
 \_La  
 chn  
 osp  
 ira  
 cea  
 e|g  
 \_\_A  
 nae  
 ros  
 tip  
 es|  
 s\_\_  
 Ana  
 ero  
 sti  
 pes  
 \_un  
 cla  
 ssi  
 fie  
 d  
 d\_\_

|     |   |   |   |   |   |   |   |   |   |   |   |   |   |   |   |   |   |   |   |   |   |   |   |   |   |   |   |   |   |   |   |   |   |   |   |   |   |
|-----|---|---|---|---|---|---|---|---|---|---|---|---|---|---|---|---|---|---|---|---|---|---|---|---|---|---|---|---|---|---|---|---|---|---|---|---|---|
| Bac | 0 | 0 |   | 0 | 0 | 0 | 0 | 0 | 0 | 0 | 0 |   | 0 | 0 |   |   |   |   |   |   |   |   |   |   |   |   |   |   |   |   |   |   |   |   |   |   |   |
| ter | . | . |   | . | . | . | . | . | . | . | . |   | . | . |   |   |   |   |   |   |   |   |   |   |   |   |   |   |   |   |   |   |   |   |   |   |   |
| ia  | 0 | 0 |   | 0 | 0 | 0 | 0 | 0 | 0 | 0 | 0 |   | 0 | 0 |   |   |   |   |   |   |   |   |   |   |   |   |   |   |   |   |   |   |   |   |   |   |   |
| p__ | 1 | 0 | 1 | 0 | 0 | 0 | 0 | 0 | 1 | 1 | 0 | 0 | 2 | 0 | 0 | 0 | 1 | 0 | 1 | 1 | 0 | 0 | 1 | 0 | 0 | 0 | 0 | 0 | 0 | 0 | 0 | 0 | 0 | 2 | 0 | 1 | 0 |

```

Fir
mic
ute
s|c
__C
los
tri
dia
|o_
_La
chn
osp
ira
les
|f_
_La
chn
osp
ira
cea
elg
__B
lau
tia
d__
Bac
ter
ia|
p__
Fir
mic
ute
s|c
__C
los
tri
dia
|o_
_La
chn
osp 0 0          0 0  0      0 0 0      0          0 0
ira . .          . .  .      . . .      .          . .
les 0 0          0 0  0      0 0 0      0          0 0
|f_ 1 0 1 0 0 0 0 0 1 1 0 0 2 0 0 0 1 0 1 1 0 0 1 0 0 0 0 0 0 0 0 0 0 2 0 1 0

```









```

chn
osp
ira
les
|f_
_La
chn
osp
ira
cea
e|g
__D
ore
a|s
__D
ore
a_u
ncl
ass
ifi
ed
d__
Bac
ter
ia|
p__
Fir
mic
ute
s|c
__C
los
tri
dia
|o_
_La
chn
osp
ira
les
|f_           0 0 0           0           0           0 0   0 0 0 0 0
_La           . . .           .           .           . .   . . . . .
chn           0 0 0           0           0           0 0   0 0 0 0 0
osp  0 0 0 0 0 1 1 1 0 0 0 0 0 0 0 0 0 0 0 1 0 0 0 0 0 0 0 0 0 0 1 0 0 0 1 1 1 0 0

```

ira  
cea  
elg  
\_\_E  
uba  
cte  
riu  
m]\_  
oxi  
dor  
edu  
cen  
s\_g  
rou  
p  
d\_\_  
Bac  
ter  
ia|  
p\_\_  
Fir  
mic  
ute  
s|c  
\_\_C  
los  
tri  
dia  
lo\_  
\_La  
chn  
osp  
ira  
les  
|f\_  
\_La  
chn  
osp  
ira  
cea  
elg  
\_\_E  
uba  
cte

0 0 0      0      0      0 0    0 0 0 0 0  
  . . .     .     .     . .    . . . . .  
0 0 0      0      0      0 0    0 0 0 0 0  
0 0 0 0 0 1 1 1 0 0 0 0 0 0 0 0 1 0 0 0 0 0 0 0 1 0 0 0 1 1 1 0 0

```

riu
m]_
oxi
dor
edu
cen
s_g
rou
p|s
__E
uba
cte
riu
m]_
oxi
dor
edu
cen
s_g
rou
p_u
ncl
ass
ifi
ed
d__
Bac
ter
ia|
p__
Fir
mic
ute
s|c
__C
los
tri
dia
|o_
_La
chn  0          0          0          0          0 0 0 0  0 0 0 0
osp  .          .          .          .          . . . .  . . . .
ira  0          0          0          0          0 2 0  0 0 0 1
les  0 0 0 0 0 0 0 0 0 0 0 0 0 0 0 1 0 0 0 0 0 0 0 0 0 0 0 2 0 2 0 2 3 2 0 0 0

```

```

|f_
_La
chn
osp
ira
cea
e|g
__E
uba
cte
riu
m]_
rum
ina
nti
um_
gro
up
d__
Bac
ter
ia|
p__
Fir
mic
ute
s|c
__C
los
tri
dia
|o_
_La
chn
osp
ira
les
|f_
_La
chn
osp    0          0          0          0          0 0 0 0  0 0 0 0
ira    .          .          .          .          . . . .  . . . .
cea    0          0          0          0          0 2 0  0 0 0 1
e|g    0 0 0 0 0 0 0 0 0 0 0 0 0 0 0 1 0 0 0 0 0 0 0 0 0 0 0 0 2 0 2 0 2 3 2 0 0 0

```

```

__E
uba
cte
riu
m]_
rum
ina
nti
um_
gro
up|
s__
Eub
act
eri
um]
_ru
min
ant
ium
_gr
oup
_un
cla
ssi
fie
d
d__
Bac
ter
ia|
p__
Fir
mic
ute
s|c
__C
los
tri
dia
|o_      0 0 0 0      0 0      0 0 0 0 0 0      0 0 0 0 0 0
_La      . . . .      . .      . . .      . .      . . .      . .
chn      0 0 0 0      0 0      0 0 0 0 0 0      0 0 0 0 1 0
osp 0 0 0 0 0 6 1 3 3 0 0 0 0 0 0 0 2 2 0 0 1 1 2 0 1 0 0 0 1 1 1 0 3 2

```

ira  
 les  
 |f\_  
 \_La  
 chn  
 osp  
 ira  
 cea  
 elg  
 \_\_E  
 uba  
 cte  
 riu  
 m]\_  
 ven  
 tri  
 osu  
 m\_g  
 rou  
 p  
 d\_\_  
 Bac  
 ter  
 ia|  
 p\_\_  
 Fir  
 mic  
 ute  
 s|c  
 \_\_C  
 los  
 tri  
 dia  
 |o\_  
 \_La  
 chn  
 osp  
 ira  
 les  
 |f\_  
 \_La  
 chn  
 osp  
 ira

|     |   |   |   |   |   |   |   |   |   |   |   |   |   |   |   |   |   |   |   |   |   |   |   |   |   |   |   |   |   |   |   |   |   |   |   |   |   |
|-----|---|---|---|---|---|---|---|---|---|---|---|---|---|---|---|---|---|---|---|---|---|---|---|---|---|---|---|---|---|---|---|---|---|---|---|---|---|
|     | 0 | 0 | 0 | 0 |   | 0 | 0 |   | 0 | 0 | 0 | 0 |   | 0 | 0 | 0 | 0 |   | 0 | 0 | 0 | 0 |   | 0 | 0 | 0 | 0 |   |   |   |   |   |   |   |   |   |   |
|     | . | . | . | . |   | . | . |   | . | . | . | . |   | . | . | . | . |   | . | . | . | . |   | . | . | . | . |   |   |   |   |   |   |   |   |   |   |
|     | 0 | 0 | 0 | 0 |   | 0 | 0 |   | 0 | 0 | 0 | 0 |   | 0 | 0 | 0 | 0 |   | 0 | 0 | 0 | 0 |   | 1 | 0 | 0 | 0 |   |   |   |   |   |   |   |   |   |   |
| ira | 0 | 0 | 0 | 0 | 0 | 6 | 1 | 3 | 3 | 0 | 0 | 0 | 0 | 0 | 0 | 0 | 0 | 0 | 0 | 2 | 2 | 0 | 0 | 1 | 1 | 2 | 0 | 1 | 0 | 0 | 0 | 1 | 1 | 1 | 0 | 3 | 2 |

```

cea
elg
__E
uba
cte
riu
m]_
ven
tri
osu
m_g
rou
p|s
__E
uba
cte
riu
m]_
ven
tri
osu
m_g
rou
p_u
ncl
ass
ifi
ed
d__
Bac
ter
ia|
p__
Fir
mic
ute
s|c
__C
los
tri
dia 0 0 0 0 0 0 2 1 0 0 2 0 0 0 0 0 0 0 0 0 0 0 1 0 0 1 0 0 0 0 0 3 0 0
|o_ . . . . .
_La 0 0 1 0 1 3 0 0 6 4 5 3 0 1 3 0 3 0 1 2 2 4 0 3 9 9 3 1 3 1 7 8 5 2
chn 9 8 3 8 3 4 3 2 1 5 6 6 9 7 9 4 3 3 8 4 1 9 2 3 6 7 7 8 0 2 7 5 3 7

```



```

osp
ira
les
|f_
_La
chn
osp
ira
cea
e|g
__E
uba
cte
riu
m]_
xyl
ano
phi
lum
_gr
oup
d__
Bac
ter
ia|
p__
Fir
mic
ute
s|c
__C
los
tri
dia
|o_
_La
chn
osp
ira
les
|f_ 0 0 0 0 0 0 2 1 0 0 2 0 0 0 0 0 0 0 0 0 0 0 1 0 0 1 0 0 0 0 0 3 0 0
_La . . . . .
chn 0 0 1 0 1 3 0 0 6 4 5 3 0 1 3 0 3 0 1 2 2 4 0 3 9 9 3 1 3 1 7 8 5 2
osp 9 8 3 8 3 4 3 2 1 5 6 6 9 7 9 4 3 3 8 4 1 9 2 3 6 7 7 8 0 2 7 5 3 7

```

ira  
cea  
e|g  
\_E  
uba  
cte  
riu  
m|\_  
xyl  
ano  
phi  
lum  
\_gr  
oup  
|s\_  
\_Eu  
bac  
ter  
ium  
|\_x  
yla  
nop  
hil  
um\_  
gro  
up\_  
unc  
las  
sif  
ied  
d\_\_  
Bac  
ter  
ial  
p\_\_  
Fir  
mic  
ute  
s|c  
\_\_C  
los 0 0 0 0  
tri . . . .  
dia 0 0 0 0  
|o\_ 0 0 1 0 0 0 0 0 0 1 0 0 0 0 0 0 0 0 0 0 0 0 0 0 1 0 0 0 0 0 0 0 1 0 0



```

__F
ris
ing
ico
ccu
s|s
__F
ris
ing
ico
ccu
s_u
ncl
ass
ifi
ed
d__
Bac
ter
ia|
p__
Fir
mic
ute
s|c
__C
los
tri
dia
|o_
_La
chn
osp
ira
les
|f_
_La
chn
osp
ira
cea          0          0          0
elg          .          .          .
__F          0          0          0
usi 0 0 0 0 0 0 0 0 1 0 0 0 0 0 0 0 0 0 1 0 0 0 0 1 0 0 0 0 0 0 0 0 0 0 0 0 0 0 0 0

```

```

cat
eni
bac
ter
d__
Bac
ter
ia|
p__
Fir
mic
ute
s|c
__C
los
tri
dia
|o_
_La
chn
osp
ira
les
|f_
_La
chn
osp
ira
cea
elg
__F
usi
cat
eni
bac
ter
|s_
_Fu
sic
ate
nib          0          0          0
act          .          .          .
er_          0          0          0
unc 0 0 0 0 0 0 0 0 1 0 0 0 0 0 0 0 0 0 1 0 0 0 0 1 0 0 0 0 0 0 0 0 0 0 0

```

las  
sif  
ied  
d\_\_  
Bac  
ter  
ial  
p\_\_  
Fir  
mic  
ute  
s|c  
\_\_C  
los  
tri  
dia  
|o\_  
\_La  
chn  
osp  
ira  
les  
|f\_  
\_La  
chn  
osp  
ira  
cea  
elg  
\_\_G

CA- 0 0 0 0 0 0 0 0 0 1 0 0 0 0 0 0 0 0 0 0 0 0 0 0 0 0 0 0 0 0 0 0  
900 . . . . . . . . . . . . . . . . . . . . . . . . . . . . . . . . . .  
066 0 0 0 1 1 2 1 0 5 0 0 1 0 0 0 0 0 0 0 0 0 1 0 0 0 0 0 0 1 0  
575 0 0 7 1 1 4 2 8 1 1 4 7 2 0 7 0 0 1 1 2 0 2 4 0 9 5 0 1 1 1 2 4 3 0

d\_\_  
Bac  
ter  
ial  
p\_\_  
Fir  
mic  
ute  
s|c  
\_\_C

0 0 0 0 0 0 0 0 0 1 0 0 0 0 0 0 0 0 0 0 0 0 0 0 0 0 0 0 0 0 0 0  
. . . . . . . . . . . . . . . . . . . . . . . . . . . . . . . . . .  
0 0 0 1 1 2 1 0 5 0 0 1 0 0 0 0 0 0 0 0 0 1 0 0 0 0 0 0 1 0  
0 0 7 1 1 4 2 8 1 1 4 7 2 0 7 0 0 1 1 2 0 2 4 0 9 5 0 1 1 1 2 4 3 0











```

ira
cea
e_A
C20
44_
gro
up_
unc
las
sif
ied
d__
Bac
ter
ia|
p__
Fir
mic
ute
s|c
__C
los
tri
dia
|o_
_La
chn
osp
ira
les
|f_
_La
chn
osp
ira
cea
e|g
__L
ach
nos
pir    0 0                0 0                0
ace    . .                . .                .
ae_    0 0                0 0                0
FCS    0 0 1 0 0 0 0 0 0 0 4 1 0 0 0 0 0 0 0 0 0 0 0 0 0 0 1 0 0 0 0 0 0 0

```

```

020
_gr
oup
d__
Bac
ter
ial
p__
Fir
mic
ute
s|c
__C
los
tri
dia
|o_
_La
chn
osp
ira
les
|f_
_La
chn
osp
ira
cea
elg
__L
ach
nos
pir
ace
ae_
FCS
020
_gr
oup
|s_
_La  0 0          0 0          0
chn  . .          . .          .
osp  0 0          0 0          0
ira  0 0 1 0 0 0 0 0 0 0 4 1 0 0 0 0 0 0 0 0 0 0 0 0 0 0 0 0 1 0 0 0 0 0 0 0 0 0

```

```

cea
e_F
CS0
20_
gro
up_
unc
las
sif
ied
d__
Bac
ter
ia|
p__
Fir
mic
ute
s|c
__C
los
tri
dia
|o_
_La
chn
osp
ira
les
|f_
_La
chn
osp
ira
cea
elg
__L
ach
nos
pir
ace          0          0          0  0          0
ae_          .          .          .  .          .
NC2          0          0          0  0          0
004 0 0 0 0 0 0 1 0 0 0 0 1 0 0 4 0 1 0 0 0 0 0 0 0 0 0 0 0 0 0 0 0 0 0 0 1 0 0 0 0 0 0 0

```

```

_gr
oup
d__
Bac
ter
ia|
p__
Fir
mic
ute
s|c
__C
los
tri
dia
|o_
_La
chn
osp
ira
les
|f_
_La
chn
osp
ira
cea
e|g
__L
ach
nos
pir
ace
ae_
NC2
004
_gr
oup
|s_
_La
chn          0          0          0  0          0
osp          .          .          .  .          .
ira          0          0          0  0          0
cea 0 0 0 0 0 0 1 0 0 0 0 1 0 0 4 0 1 0 0 0 0 0 0 0 0 0 0 0 0 0 0 1 0 0 0 0 0 0

```







D30  
07\_  
gro  
up\_  
unc  
las  
sif  
ied  
d\_\_  
Bac  
ter  
ial  
p\_\_  
Fir  
mic  
ute  
s|c  
\_\_C  
los  
tri  
dia  
|o\_  
\_La  
chn  
osp  
ira  
les  
|f\_  
\_La  
chn  
osp  
ira  
cea  
e|g  
\_\_L  
ach  
nos  
pir  
ace  
ae\_  
NK4 0 1 3 5 3 9 8 8 4 5 8 1 5 6 5 0 4 2 1 7 4 0 9 1 0 8 3 4 7 6 7 7 5 1  
A13 . . . . .  
6\_g 3 4 0 0 5 9 7 9 1 9 4 7 0 3 6 0 9 5 5 6 3 1 1 1 0 2 2 7 4 7 6 6 6 1  
rou 9 3 1 8 3 5 2 2 9 7 4 3 0 6 3 4 3 5 5 5 5 2 3 7 5 0 9 4 3 6 3 5 4 2

p  
 d\_  
 Bac  
 ter  
 ia |  
 p\_  
 Fir  
 mic  
 ute  
 s | c  
 \_ C  
 los  
 tri  
 dia  
 | o\_  
 \_ La  
 chn  
 osp  
 ira  
 les  
 | f\_  
 \_ La  
 chn  
 osp  
 ira  
 cea  
 e | g  
 \_ L  
 ach  
 nos  
 pir  
 ace  
 ae\_  
 NK4  
 A13  
 6\_g  
 rou  
 p | s  
 \_ L  
 ach  
 nos  
 pir  
 ace  
 ae\_

|     |   |   |   |   |   |   |   |   |   |   |   |   |   |   |   |   |   |   |   |   |   |   |   |   |   |   |   |   |   |   |   |   |   |   |   |
|-----|---|---|---|---|---|---|---|---|---|---|---|---|---|---|---|---|---|---|---|---|---|---|---|---|---|---|---|---|---|---|---|---|---|---|---|
| ach |   | 2 |   | 2 | 2 | 3 | 1 | 1 |   |   | 1 | 1 | 1 |   | 2 | 1 |   |   |   |   |   |   |   |   |   |   |   |   |   |   |   |   |   |   |   |
| nos | 0 | 1 | 3 | 5 | 3 | 9 | 8 | 8 | 4 | 5 | 8 | 1 | 5 | 6 | 5 | 0 | 4 | 2 | 1 | 7 | 4 | 0 | 9 | 1 | 0 | 8 | 3 | 4 | 7 | 6 | 7 | 7 | 5 | 1 |   |
| pir | . | . | . | . | . | . | . | . | . | . | . | . | . | . | . | . | . | . | . | . | . | . | . | . | . | . | . | . | . | . | . | . | . |   |   |
| ace | 3 | 4 | 0 | 0 | 5 | 9 | 7 | 9 | 1 | 9 | 4 | 7 | 0 | 3 | 6 | 0 | 9 | 5 | 5 | 6 | 3 | 1 | 1 | 1 | 0 | 2 | 2 | 7 | 4 | 7 | 6 | 6 | 6 | 1 |   |
| ae_ | 9 | 3 | 1 | 8 | 3 | 5 | 2 | 2 | 9 | 7 | 4 | 3 | 0 | 6 | 3 | 4 | 3 | 5 | 5 | 5 | 5 | 5 | 2 | 3 | 7 | 5 | 0 | 9 | 4 | 3 | 6 | 3 | 5 | 4 | 2 |

```

NK4
A13
6_g
rou
p_u
ncl
ass
ifi
ed
d__
Bac
ter
ia|
p__
Fir
mic
ute
s|c
__C
los
tri
dia
|o_
_La
chn
osp
ira
les
|f_
_La
chn
osp
ira
cea
e|g
__L
ach
nos
pir
ace
ae_          0          0    0 0 0 2    0 0 0
NK4          .          .    . . . .    . . .
B4_          0          0    5 0 0 0    1 1 0
gro 0 0 0 0 0 0 0 0 0 0 0 0 0 0 0 0 5 0 0 0 0 0 1 0 0 0 1 1 2 0 0 1 1 0 0

```

```

up
d__
Bac
ter
ia|
p__
Fir
mic
ute
s|c
__C
los
tri
dia
|o_
_La
chn
osp
ira
les
|f_
_La
chn
osp
ira
cea
e|g
__L
ach
nos
pir
ace
ae_
NK4
B4_
gro
up|
s__
Lac
hno
spi          0          0    0 0 0 2    0 0 0
rac          .          .    . . . .    . . .
eae          0          0    5 0 0 0    1 1 0
_NK 0 0 0 0 0 0 0 0 0 0 0 0 0 0 0 0 5 0 0 0 0 0 1 0 0 0 1 1 2 0 0 1 1 0 0

```



|     |   |   |   |   |   |   |
|-----|---|---|---|---|---|---|
| Bac | . | . | . | . | . | . |
| ter | 0 | 0 | 3 | 0 | 0 | 0 |
| ia  | 1 | 6 | 1 | 1 | 5 | 1 |
| p__ |   |   |   |   |   |   |
| Fir |   |   |   |   |   |   |
| mic |   |   |   |   |   |   |
| ute |   |   |   |   |   |   |
| s c |   |   |   |   |   |   |
| __C |   |   |   |   |   |   |
| los |   |   |   |   |   |   |
| tri |   |   |   |   |   |   |
| dia |   |   |   |   |   |   |
| o_  |   |   |   |   |   |   |
| _La |   |   |   |   |   |   |
| chn |   |   |   |   |   |   |
| osp |   |   |   |   |   |   |
| ira |   |   |   |   |   |   |
| les |   |   |   |   |   |   |
| f_  |   |   |   |   |   |   |
| _La |   |   |   |   |   |   |
| chn |   |   |   |   |   |   |
| osp |   |   |   |   |   |   |
| ira |   |   |   |   |   |   |
| cea |   |   |   |   |   |   |
| e g |   |   |   |   |   |   |
| __L |   |   |   |   |   |   |
| ach |   |   |   |   |   |   |
| nos |   |   |   |   |   |   |
| pir |   |   |   |   |   |   |
| ace |   |   |   |   |   |   |
| ae_ |   |   |   |   |   |   |
| UCG |   |   |   |   |   |   |
| -   |   |   |   |   |   |   |
| 001 |   |   |   |   |   |   |
| s_  |   |   |   |   |   |   |
| _La |   |   |   |   |   |   |
| chn |   |   |   |   |   |   |
| osp |   |   |   |   |   |   |
| ira |   |   |   |   |   |   |
| cea |   |   |   |   |   |   |
| e_U |   |   |   |   |   |   |
| CG- |   |   |   |   |   |   |
| 001 |   |   |   |   |   |   |
| _un |   |   |   |   |   |   |



Fir  
mic  
ute  
s|c  
\_\_C  
los  
tri  
dia  
|o\_  
\_La  
chn  
osp  
ira  
les  
|f\_  
\_La  
chn  
osp  
ira  
cea  
e|g  
\_\_L  
ach  
nos  
pir  
ace  
ae\_  
UCG  
-  
004  
|s\_  
\_La  
chn  
osp  
ira  
cea  
e\_U  
CG-  
004  
\_un  
cla  
ssi  
fie  
d



```

d__
Bac
ter
ia|
p__
Fir
mic
ute
s|c
__C
los
tri
dia
|o_
_La
chn
osp
ira
les
|f_
_La
chn
osp
ira
cea
elg
__L
ach
nos
pir
ace
ae_      0 0 0 0 0 0      0      0 0 0 0      0      0 0 0 0 0      0 0
UCG      . . . . .      .      . . . .      .      . . . . .      . .
-        0 0 0 0 0 0      0      0 0 0 0      0      0 0 0 0 1      0 0
006      0 0 2 1 2 3 5 8 0 0 5 0 0 0 0 1 4 1 0 0 0 3 0 0 6 3 8 2 3 0 0 2 2 0
d__
Bac
ter
ia|
p__
Fir      0 0 0 0 0 0      0      0 0 0 0      0      0 0 0 0 0      0 0
mic      . . . . .      .      . . . .      .      . . . . .      . .
ute      0 0 0 0 0 0      0      0 0 0 0      0      0 0 0 0 1      0 0
s|c      0 0 2 1 2 3 5 8 0 0 5 0 0 0 0 1 4 1 0 0 0 3 0 0 6 3 8 2 3 0 0 2 2 0

```





lo\_  
\_La  
chn  
osp  
ira  
les  
|f\_  
\_La  
chn  
osp  
ira  
cea  
e|g  
\_\_L  
ach  
nos  
pir  
ace  
ae\_  
UCG  
-  
010  
|s\_  
\_La  
chn  
osp  
ira  
cea  
e\_U  
CG-  
010  
\_un  
cla  
ssi  
fie  
d  
d\_\_  
Bac  
ter  
ial

|     |         |       |               |                 |                 |               |
|-----|---------|-------|---------------|-----------------|-----------------|---------------|
| p__ | 0 0     | 0 0 0 | 0 0 0 0 0 0 0 | 0 0 0 0 0 0 0 0 | 0 0             | 0 0 0         |
| Fir | .       | .     | .             | .               | .               | .             |
| mic | 0 0     | 0 0 0 | 0 0 0 0 0 0 0 | 0 0 0 0 0 0 0 0 | 0 0             | 0 0 0         |
| ute | 0 0 0 0 | 2 0 0 | 1 1 1 0       | 1 6 3 2 2 4 3 0 | 6 4 4 5 4 5 4 1 | 0 2 1 0 1 1 1 |

s|c  
\_\_C  
los  
tri  
dia  
|o\_  
\_La  
chn  
osp  
ira  
les  
|f\_  
\_La  
chn  
osp  
ira  
cea  
e|g  
\_\_L  
ach  
nos  
pir  
ace  
ae\_  
XPB  
101  
4\_g  
rou  
p  
d\_\_  
Bac  
ter  
ia|  
p\_\_  
Fir  
mic  
ute  
s|c  
\_\_C  
los  
tri  
dia  
|o\_  
\_La

|  |         |       |               |                 |                 |               |
|--|---------|-------|---------------|-----------------|-----------------|---------------|
|  | 0 0     | 0 0 0 | 0 0 0 0 0 0 0 | 0 0 0 0 0 0 0 0 | 0 0             | 0 0 0         |
|  | .       | .     | .             | .               | .               | .             |
|  | 0 0     | 0 0 0 | 0 0 0 0 0 0 0 | 0 0 0 0 0 0 0 0 | 0 0             | 0 0 0         |
|  | 0 0 0 0 | 2 0 0 | 1 1 1 0       | 1 6 3 2 2 4 3 0 | 6 4 4 5 4 5 4 1 | 0 2 1 0 1 1 1 |

```

chn
osp
ira
les
|f_
_La
chn
osp
ira
cea
e|g
__L
ach
nos
pir
ace
ae_
XPB
101
4_g
rou
p|s
__L
ach
nos
pir
ace
ae_
XPB
101
4_g
rou
p_u
ncl
ass
ifi
ed
d__
Bac
ter
ia|      0  0 0 0 0 0  0 0 0 0 0  0  0 0 0  0 0  0 0  0 0 0
p__      .  . . . . .  . . . . .  .  . . .  . .  . .  . . .
Fir      0  0 0 0 0 0  0 0 0 0 0  0  0 2 0  0 0  0 0  0 0 0
mic 0 0 1 0 1 1 1 4 2 0 8 1 1 1 1 0 0 1 0 6 9 1 0 0 1 0 0 1 1 0 0 4 3 0

```

ute  
s|c  
\_\_C  
los  
tri  
dia  
|o\_  
\_La  
chn  
osp  
ira  
les  
|f\_  
\_La  
chn  
osp  
ira  
cea  
elg  
\_\_L  
ach  
nos  
pir  
ace  
ae\_  
unc  
las  
sif  
ied  
d\_  
Bac  
ter  
ia|  
p\_  
Fir  
mic  
ute  
s|c  
\_\_C  
los  
tri 0 0 0 0 0 0 0 0 0 0 0 0 0 0 0 0 0 0 0 0 0  
dia . . . . . . . . . . . . . . . . . . . . . . . . .  
|o\_ 0 0 0 0 0 0 0 0 0 0 0 0 2 0 0 0 0 0 0 0 0 0  
\_La 0 0 1 0 1 1 1 4 2 0 8 1 1 1 1 0 0 1 0 6 9 1 0 0 1 0 0 1 1 0 0 4 3 0







```

cea
elg
__M
arv
inb
rya
nti
a|s
__M
arv
inb
rya
nti
a_u
ncl
ass
ifi
ed
d__
Bac
ter
ia|
p__
Fir
mic
ute
s|c
__C
los
tri
dia
|o_
_La
chn
osp
ira
les
|f_
_La
chn
osp          0 0 0 0 0 0 0 0 0 0 0 0 0 0 0 0 0 0 0 0
ira          . . . . . . . . . . . . . . . . . . . .
cea          0 3 0 0 3 0 0 0 0 0 0 0 0 0 0 0 0 0 0 0
elg 0 0 0 0 0 1 2 3 2 0 6 0 0 1 0 5 4 0 2 0 0 0 3 1 0 5 2 3 4 3 3 3 4 0

```







|     |                     |  |                     |  |                                 |   |  |         |  |       |
|-----|---------------------|--|---------------------|--|---------------------------------|---|--|---------|--|-------|
| ia  | 1 1                 |  | 4                   |  | 2 1 0                           | 1 |  | 3 1 2 1 |  | 3 1 1 |
| p__ |                     |  |                     |  |                                 |   |  |         |  |       |
| Fir |                     |  |                     |  |                                 |   |  |         |  |       |
| mic |                     |  |                     |  |                                 |   |  |         |  |       |
| ute |                     |  |                     |  |                                 |   |  |         |  |       |
| s c |                     |  |                     |  |                                 |   |  |         |  |       |
| __C |                     |  |                     |  |                                 |   |  |         |  |       |
| los |                     |  |                     |  |                                 |   |  |         |  |       |
| tri |                     |  |                     |  |                                 |   |  |         |  |       |
| dia |                     |  |                     |  |                                 |   |  |         |  |       |
| lo_ |                     |  |                     |  |                                 |   |  |         |  |       |
| _La |                     |  |                     |  |                                 |   |  |         |  |       |
| chn |                     |  |                     |  |                                 |   |  |         |  |       |
| osp |                     |  |                     |  |                                 |   |  |         |  |       |
| ira |                     |  |                     |  |                                 |   |  |         |  |       |
| les |                     |  |                     |  |                                 |   |  |         |  |       |
| f_  |                     |  |                     |  |                                 |   |  |         |  |       |
| _La |                     |  |                     |  |                                 |   |  |         |  |       |
| chn |                     |  |                     |  |                                 |   |  |         |  |       |
| osp |                     |  |                     |  |                                 |   |  |         |  |       |
| ira |                     |  |                     |  |                                 |   |  |         |  |       |
| cea |                     |  |                     |  |                                 |   |  |         |  |       |
| e g |                     |  |                     |  |                                 |   |  |         |  |       |
| __R |                     |  |                     |  |                                 |   |  |         |  |       |
| umi |                     |  |                     |  |                                 |   |  |         |  |       |
| noc |                     |  |                     |  |                                 |   |  |         |  |       |
| occ |                     |  |                     |  |                                 |   |  |         |  |       |
| us] |                     |  |                     |  |                                 |   |  |         |  |       |
| _to |                     |  |                     |  |                                 |   |  |         |  |       |
| rqu |                     |  |                     |  |                                 |   |  |         |  |       |
| es_ |                     |  |                     |  |                                 |   |  |         |  |       |
| gro |                     |  |                     |  |                                 |   |  |         |  |       |
| up  |                     |  |                     |  |                                 |   |  |         |  |       |
| d__ |                     |  |                     |  |                                 |   |  |         |  |       |
| Bac |                     |  |                     |  |                                 |   |  |         |  |       |
| ter |                     |  |                     |  |                                 |   |  |         |  |       |
| ial |                     |  |                     |  |                                 |   |  |         |  |       |
| p__ |                     |  |                     |  |                                 |   |  |         |  |       |
| Fir |                     |  |                     |  |                                 |   |  |         |  |       |
| mic |                     |  |                     |  |                                 |   |  |         |  |       |
| ute | 0 0                 |  | 0                   |  | 0 0 0                           | 0 |  | 0 0 0 0 |  | 0 0 0 |
| s c | . .                 |  | .                   |  | . . .                           | . |  | . . . . |  | . . . |
| __C | 0 0                 |  | 0                   |  | 0 0 0                           | 0 |  | 0 0 0 0 |  | 0 0 0 |
| los | 1 1 0 0 0 0 0 0 0 0 |  | 4 0 0 0 0 0 0 0 0 0 |  | 2 1 0 0 1 0 0 3 1 2 1 0 0 0 0 0 |   |  | 3 1 1 0 |  |       |

```

tri
dia
|o_
_La
chn
osp
ira
les
|f_
_La
chn
osp
ira
cea
e|g
__R
umi
noc
occ
us]
_to
rqu
es_
gro
up|
s__
Rum
ino
coc
cus
]_t
orq
ues
_gr
oup
_un
cla
ssi
fie
d
d__      0 0 0 0   0 0   0 0   0 0   0 0 0   0 0 0 0 0   0 0 0 0
Bac      . . . .   . .   . .   . .   . . .   . . . . .   . . . .
ter      0 0 0 0   0 0   3 0   0 0   0 0 0   0 0 0 0 0   0 0 0 0
ia| 0 0 3 1 0 3 0 2 3 0 8 2 0 1 0 0 1 1 0 0 0 1 1 1 1 0 0 0 0 1 1 1 1 0

```

p\_\_  
 Fir  
 mic  
 ute  
 s|c  
 \_\_C  
 los  
 tri  
 dia  
 |o\_  
 \_La  
 chn  
 osp  
 ira  
 les  
 |f\_  
 \_La  
 chn  
 osp  
 ira  
 cea  
 e|g  
 \_\_T  
 uzz  
 ere  
 lla  
 d\_\_  
 Bac  
 ter  
 ia|  
 p\_\_  
 Fir  
 mic  
 ute  
 s|c  
 \_\_C  
 los  
 tri  
 dia  
 |o\_  
 \_La  
 chn  
 osp  
 ira

|     |   |   |   |   |   |   |   |   |   |   |   |   |   |   |   |   |   |   |   |   |   |   |   |   |   |   |   |   |   |   |   |   |   |   |
|-----|---|---|---|---|---|---|---|---|---|---|---|---|---|---|---|---|---|---|---|---|---|---|---|---|---|---|---|---|---|---|---|---|---|---|
|     | 0 | 0 | 0 | 0 | 0 | 0 | 0 | 0 | 0 | 0 | 0 | 0 | 0 | 0 | 0 | 0 | 0 | 0 | 0 | 0 |   |   |   |   |   |   |   |   |   |   |   |   |   |   |
|     | . | . | . | . | . | . | . | . | . | . | . | . | . | . | . | . | . | . | . | . |   |   |   |   |   |   |   |   |   |   |   |   |   |   |
|     | 0 | 0 | 0 | 0 | 0 | 0 | 3 | 0 | 0 | 0 | 0 | 0 | 0 | 0 | 0 | 0 | 0 | 0 | 0 | 0 |   |   |   |   |   |   |   |   |   |   |   |   |   |   |
| ira | 0 | 0 | 3 | 1 | 0 | 3 | 0 | 2 | 3 | 0 | 8 | 2 | 0 | 1 | 0 | 0 | 1 | 1 | 0 | 0 | 0 | 1 | 1 | 1 | 1 | 0 | 0 | 0 | 0 | 1 | 1 | 1 | 1 | 0 |



```

les
|f_
_La
chn
osp
ira
cea
e|g
__T
uzz
ere
lla
|s_
_Tu
zze
rel
la_
unc
las
sif
ied
d__
Bac
ter
ia|
p__
Fir
mic
ute
s|c
__C
los
tri
dia
|o_
_La
chn
osp
ira
les
|f_      0          0          0 0 0 0 0 0          0
_La      .          .          . . . .          .
chn      0          0          0 0 1 0 0 0          0
osp 0 0 1 0 0 0 0 0 0 0 0 7 0 0 0 0 1 1 0 7 0 0 1 0 0 1 0 0 0 0 0 0 0 0 0 0 0 0 4 0

```

```

ira
cea
e|g
__T
yzz
ere
lla
d__
Bac
ter
ia|
p__
Fir
mic
ute
s|c
__C
los
tri
dia
|o_
_La
chn
osp
ira
les
|f_
_La
chn
osp
ira
cea
e|g
__T
yzz
ere
lla
|s_
_Ty
zze
rel      0          0          0 0  0  0  0  0          0
la_      .          .          . .  .  .  .          .
unc      0          0          0 0  1  0  0          0
las 0 0 1 0 0 0 0 0 0 0 7 0 0 0 0 1 1 0 7 0 0 1 0 0 1 0 0 0 0 0 0 0 0 0 0 4 0

```

sif  
ied  
d\_\_  
Bac  
ter  
ia|  
p\_\_  
Fir  
mic  
ute  
s|c  
\_\_C  
los  
tri  
dia  
|o\_  
\_Mo  
nog 0 0 0 0 0 1 5 0 0 0 0 0 0 0 0 0 0 0 0 0 0 0 0 0 0 0 0 0 0 0 0 0 0 0 0 0 0 0 0 0 0 0 0 0 0 0 0 0 0  
lob . . . . . . . . . . . . . . . . . . . . . . . . . . . . . . . . . . . . . . . . . . . . . . . . . . . . . . . .  
ale 0 2 9 3 0 0 6 3 0 0 0 0 0 0 0 0 1 0 1 2 0 0 4 8 1 0 0 1 3 5 3 0 1 0  
s 5 4 5 7 5 1 6 3 5 2 4 4 7 2 6 4 9 8 0 2 0 2 9 2 2 8 7 1 7 3 9 9 0 6

d\_\_  
Bac  
ter  
ia|  
p\_\_  
Fir  
mic  
ute  
s|c  
\_\_C  
los  
tri  
dia  
|o\_  
\_Mo  
nog  
lob  
ale  
s|f  
\_\_M 0 0 0 0 0 1 5 0 0 0 0 0 0 0 0 0 0 0 0 0 0 0 0 0 0 0 0 0 0 0 0 0 0 0 0 0 0 0 0 0 0 0 0 0 0 0 0 0 0  
ono . . . . . . . . . . . . . . . . . . . . . . . . . . . . . . . . . . . . . . . . . . . . . . . . . . . . . . . .  
glo 0 2 9 3 0 0 6 3 0 0 0 0 0 0 0 0 1 0 1 2 0 0 4 8 1 0 0 1 3 5 3 0 1 0  
bac 5 4 5 7 5 1 6 3 5 2 4 4 7 2 6 4 9 8 0 2 0 2 9 2 2 8 7 1 7 3 9 9 0 6



```

_Mo
nog
lob
ale
s|f
__M
ono
glo
bac
eae
lg_
_Mo
nog
lob
us|
s__
Mon
ogl
obu
s_u
ncl
ass
ifi
ed
d__
Bac
ter
ia|
p__
Fir
mic
ute
s|c
__C
los
tri
dia
lo_
_Os
cil      1          1      2  1  4          2
los 0 0 1 2 6 2 1 2 4 1 4 4 9 0 8 2 4 1 8 5 9 0 2 0 3 3 0 2 2 3 4 3 5 1
pir . . . . .
ale 5 8 5 0 3 5 9 3 1 7 9 2 1 9 2 5 9 0 7 3 9 4 5 9 8 7 6 6 0 0 7 9 6 0
s     7 2 0 2 8 7 0 1 5 5 1 9 2 5 6 1 6 9 2 0 6 9 7 7 9 8 9 6 8 0 8 2 2 0

```

```

d__
Bac
ter
ia|
p__
Fir
mic
ute
s|c
__C
los
tri
dia
|o_
_Os
cil
los
pir
ale
s|f
__B
uty
ric
ico    0 0    0 0    0 0    0 0 0 0    0 0 0 0    0 0 0 0 0 0 0 0 0 0 0 0 0
cca    . .    . .    . .    . . . .    . . . .    . . . . . . . . . . . . .
cea    0 1    0 0    0 0    1 0 0 0    0 0 0 0    0 0 0 0 1 0 0 0 0 0 1 2
e      0 0 2 0 4 1 0 1 1 0 8 1 0 0 0 1 4 1 2 0 8 4 1 2 0 2 0 1 4 3 1 2 0 0

```

```

d__
Bac
ter
ia|
p__
Fir
mic
ute
s|c
__C
los
tri
dia
|o_    0    0 0    0    0 0 0    0 0 0    0 0    0    0
_Os    .    . .    .    . . .    . . .    . .    .    .
cil    0    0 0    0    0 0 0    0 0 0    0 0    0    0
los    0 0 0 0 4 1 0 0 0 0 6 0 0 0 0 0 4 1 2 0 8 1 1 0 1 0 0 1 0 0 0 0 0 0

```

```

pir
ale
s|f
__B
uty
ric
ico
cca
cea
e|g
__B
uty
ric
ico
ccu
s
d__
Bac
ter
ial
p__
Fir
mic
ute
s|c
__C
los
tri
dia
|o_
_Os
cil
los
pir
ale
s|f
__B
uty
ric
ico
cca    0    0 0      0      0 0 0    0 0 0    0 0    0    0
cea    .    . .      .      . . .    . . .    . .    .    .
e|g    0    0 0      0      0 0 0    0 0 0    0 0    0    0
__B    0 0 0 0 4 1 0 0 0 0 6 0 0 0 0 4 1 2 0 8 1 1 0 1 0 0 1 0 0 0 0 0 0

```

```

uty
ric
ico
ccu
s|s
__B
uty
ric
ico
ccu
s_u
ncl
ass
ifi
ed
d__
Bac
ter
ia|
p__
Fir
mic
ute
s|c
__C
los
tri
dia
lo_
_Os
cil
los
pir
ale
s|f
__B
uty
ric
ico
cca
cea      0          0 0  0 0 0 0  0          0 0 0 0 0 0  0 0 0 0
elg      .          . .  . . . .  .          . . . . . .  . . . .
__U      1          0 0  1 0 0 0  0          0 0 0 0 0 0  0 0 1 2
CG- 0 0 2 0 0 0 0 0 1 1 0 2 1 0 0 0 1 0 0 0 0 0 0 2 1 2 9 2 0 0 4 3 1 2 0 0

```



009

d\_\_

Bac

ter

ia|

p\_\_

Fir

mic

ute

s|c

\_\_C

los

tri

dia

lo\_

\_Os

cil

los

pir

ale

s|f

\_\_B

uty

ric

ico

cca

cea

e|g

\_\_U

CG-

009

|s\_

\_UC

G-

009

\_un

cla

0 0 0 0 0 0 0 0 0 0 0 0 0 0 0 0 0 0 0 0

ssi

. . . . . . . . . . . . . . . . . . . . . .

fie

1 0 0 1 0 0 0 0 0 0 0 0 0 0 0 0 0 0 0 0

d

0 0 2 0 0 0 0 0 1 1 0 2 1 0 0 0 0 1 0 0 0 0 0 0 2 1 2 9 2 0 0 4 3 1 2 0 0

d\_\_

0 0 0 0 0 0 0 0 0 0 0 0 0 0 0 0 0 0 0 0 0 0 0 0 0 0 0 0 0 0 0 0 0 0 0 0

Bac

. . . . . . . . . . . . . . . . . . . . . .

ter

0 0 0 0 0 0 0 0 0 0 0 0 0 0 0 0 0 0 0 0 0 0 0 0 0 0 0 0 0 0 0 0 0 0 0 0

ia|

1 3 8 0 0 0 0 0 0 1 0 0 0 0 0 0 0 0 0 0 0 0 0 0 3 0 0 0 0 2 2 0 0 1 2 2 1 1 1

```

p__
Fir
mic
ute
s|c
__C
los
tri
dia
|o_
_Os
cil
los
pir
ale
s|f
__C
los
tri
diu
m]_
met
hyl
pen
tos
um_
gro
up
d__
Bac
ter
ia|
p__
Fir
mic
ute
s|c
__C
los
tri
dia 0 0 0 0 0      0      0      0 0      0 0 0 0 0 0
|o_ . . . . .      .      .      . . . . .
_Os 0 0 0 0 0      0      0      0 0      0 0 0 0 3 0
cil 1 3 8 0 0 0 0 0 1 0 0 0 0 0 0 0 0 0 0 0 3 0 0 0 0 2 2 0 0 1 2 2 1 1 1

```

```

los
pir
ale
s|f
__C
los
tri
diu
m]_
met
hyl
pen
tos
um_
gro
up|
g__
Clo
str
idi
um]
_me
thy
lpe
nto
sum
_gr
oup
_un
cla
ssi
fie
d
d__
Bac
ter
ial
p__
Fir
mic
ute 0 0 0 0 0      0          0          0 0      0 0 0 0 0 0
s|c . . . . .      .          .          . .      . . . . .
__C 0 0 0 0 0      0          0          0 0      0 0 0 0 3 0
los 1 3 8 0 0 0 0 0 1 0 0 0 0 0 0 0 0 0 0 0 3 0 0 0 0 0 2 2 0 0 1 2 2 1 1 1

```

tri  
dia  
lo\_  
\_Os  
cil  
los  
pir  
ale  
s|f  
\_\_C  
los  
tri  
diu  
m]\_  
met  
hyl  
pen  
tos  
um\_  
gro  
up|  
g\_\_  
Clo  
str  
idi  
um]  
\_me  
thy  
lpe  
nto  
sum  
\_gr  
oup  
\_un  
cla  
ssi  
fie  
d|s  
\_\_C  
los  
tri  
diu  
m]\_  
met



|     |               |     |                       |                       |
|-----|---------------|-----|-----------------------|-----------------------|
| Bac | . . . . .     | . . | . . . . .             | . . . . .             |
| ter | 0 2 2 3 0 0 0 | 0 0 | 0 0 1 0 0 0 0 0 0 0   | 0 0 7 2 0 0 0 5 1 0 2 |
| ia  | 1 2 4 8 1 8 2 | 2 1 | 1 9 5 2 9 1 2 2 2 2 5 | 4 6 3 0 3 2 7 0 1 1 1 |

p\_\_

Fir

mic

ute

s|c

\_\_C

los

tri

dia

|o\_

\_Os

cil

los

pir

ale

s|f

\_\_E

uba

cte

riu

m]\_

cop

ros

tan

oli

gen

es\_

gro

up|

g\_\_

Eub

act

eri

um]

\_co

pro

sta

nol

ige

nes

\_gr



\_co  
pro  
sta  
nol  
ige  
nes  
\_gr  
oup  
\_un  
cla  
ssi  
fie  
d|s  
\_\_E  
uba  
cte  
riu  
m|\_  
cop  
ros  
tan  
oli  
gen  
es\_  
gro  
up\_  
unc  
las  
sif  
ied  
d\_\_  
Bac  
ter  
ia|  
p\_\_  
Fir  
mic  
ute  
s|c  
\_\_C  
los 0 0 0 0 0  
tri . . .  
dia 0 0 0 0 0  
|o\_ 0 0 0 0 0 0 0 0 0 0 0 1 0 0 0 0 0 0 0 0 0 0 0 0 0 0 0 1 0 0 0 0 0 0



\_Os  
cil  
los  
pir  
ale  
s|f  
\_\_H  
ung  
ate  
icl  
ost  
rid  
iac  
eae  
d\_\_  
Bac  
ter  
ia|  
p\_\_  
Fir  
mic  
ute  
s|c  
\_\_C  
los  
tri  
dia  
|o\_  
\_Os  
cil  
los  
pir  
ale  
s|f  
\_\_H  
ung  
ate  
icl  
ost  
rid  
iac                      0  
eae                       .  
|g\_                       0  
\_Ru  0 0 0 0 0 0 0 0 0 0 0 0 0 1 0 0 0 0 0 0 0 0 0 0 0 0 0 0 0 0 0 0 0 0 0 0 0 0 0 0 0 0





|     |   |   |   |   |
|-----|---|---|---|---|
| Bac | . | . | . | . |
| ter | 0 | 0 | 0 | 0 |
| ia  | 0 | 0 | 1 | 0 |
| p__ |   |   |   |   |
| Fir |   |   |   |   |
| mic |   |   |   |   |
| ute |   |   |   |   |
| s c |   |   |   |   |
| __C |   |   |   |   |
| los |   |   |   |   |
| tri |   |   |   |   |
| dia |   |   |   |   |
| lo_ |   |   |   |   |
| _Os |   |   |   |   |
| cil |   |   |   |   |
| los |   |   |   |   |
| pir |   |   |   |   |
| ale |   |   |   |   |
| s f |   |   |   |   |
| __H |   |   |   |   |
| ung |   |   |   |   |
| ate |   |   |   |   |
| icl |   |   |   |   |
| ost |   |   |   |   |
| rid |   |   |   |   |
| iac |   |   |   |   |
| eae |   |   |   |   |
| lg_ |   |   |   |   |
| _Th |   |   |   |   |
| erm |   |   |   |   |
| ocl |   |   |   |   |
| ost |   |   |   |   |
| rid |   |   |   |   |
| ium |   |   |   |   |
| ls_ |   |   |   |   |
| _Th |   |   |   |   |
| erm |   |   |   |   |
| ocl |   |   |   |   |
| ost |   |   |   |   |
| rid |   |   |   |   |
| ium |   |   |   |   |
| _un |   |   |   |   |
| cla |   |   |   |   |
| ssi |   |   |   |   |

```

fie
d
d__
Bac
ter
ia|
p__
Fir
mic
ute
s|c
__C
los
tri
dia
|o_
_Os
cil
los
pir
ale
s|f
__O
sci
llo 0 0 1 0 0 1 1 1 1 0 9 1 0 0 0 0 0 0 0 0 0 0 0 0 0 0 0 0 0 2 1 0 1 0 2 3 2 0 0
spi . . . . .
rac 1 0 3 7 3 5 0 2 3 6 8 5 1 1 2 5 2 5 6 6 5 1 8 5 6 8 2 6 7 2 6 3 6 2
eae 5 4 6 0 1 9 1 6 7 0 7 8 9 8 3 9 9 0 5 3 6 0 2 8 1 5 2 1 9 6 0 1 2 5
d__
Bac
ter
ia|
p__
Fir
mic
ute
s|c
__C
los
tri
dia 0 0 0 0 0 0 0 0 0 4 0 0 0 0 0 0 0 0 0 0 0 0 0 0 0 0 0 0 0 0 0 0 0 0 0 0 0
|o_ . . . . .
_Os 0 3 2 1 1 0 3 7 0 4 0 0 0 0 0 1 0 0 4 0 0 0 6 4 0 2 4 1 3 5 1 0
cil 3 0 6 3 0 2 6 0 7 4 1 9 2 3 4 3 1 0 5 4 4 3 4 2 8 1 5 1 0 4 0 4 8 6

```

los  
pir  
ale  
s|f  
\_\_O  
sci  
llo  
spi  
rac  
eae  
lg\_  
\_Co  
lid  
ext  
rib  
act  
er  
d\_\_  
Bac  
ter  
ia|  
p\_\_  
Fir  
mic  
ute  
s|c  
\_\_C  
los  
tri  
dia  
|o\_  
\_Os  
cil  
los  
pir  
ale  
s|f  
\_\_O  
sci  
llo  
spi  
rac  
eae  
lg\_

|     |   |   |   |   |   |   |   |   |   |   |   |   |   |   |   |   |   |   |   |   |   |   |   |   |   |   |   |   |   |   |   |   |   |   |   |   |   |   |   |
|-----|---|---|---|---|---|---|---|---|---|---|---|---|---|---|---|---|---|---|---|---|---|---|---|---|---|---|---|---|---|---|---|---|---|---|---|---|---|---|---|
| spi | 0 | 0 | 0 | 0 | 0 | 0 | 0 | 0 | 0 | 0 | 4 | 0 | 0 | 0 | 0 | 0 | 0 | 0 | 0 | 0 | 0 | 0 | 0 | 0 | 0 | 0 | 0 | 0 | 0 | 0 | 0 | 0 | 0 | 0 | 0 | 0 | 0 | 0 |   |
| rac | . | . | . | . | . | . | . | . | . | . | . | . | . | . | . | . | . | . | . | . | . | . | . | . | . | . | . | . | . | . | . | . | . | . | . | . | . | . | . |
| eae | 0 | 3 | 2 | 1 | 1 | 0 | 3 | 7 | 0 | 4 | 0 | 0 | 0 | 0 | 0 | 1 | 0 | 0 | 4 | 0 | 0 | 0 | 6 | 4 | 0 | 2 | 4 | 1 | 3 | 5 | 1 | 0 |   |   |   |   |   |   |   |
| lg_ | 3 | 0 | 6 | 3 | 0 | 2 | 6 | 0 | 7 | 4 | 1 | 9 | 2 | 3 | 4 | 3 | 1 | 0 | 5 | 4 | 4 | 3 | 4 | 2 | 8 | 1 | 5 | 1 | 0 | 4 | 0 | 4 | 8 | 6 |   |   |   |   |   |



```
_Fl  
avo  
nif  
rac  
tor  
d__  
Bac  
ter  
ia|  
p__  
Fir  
mic  
ute  
s|c  
__C  
los  
tri  
dia  
lo_  
_Os  
cil  
los  
pir  
ale  
s|f  
__O  
sci  
llo  
spi  
rac  
eae  
lg_  
_Fl  
avo  
nif  
rac  
tor  
|s_  
_Fl  
avo  
nif 0  
rac .  
tor 0  
_un 0 0 0 0 0 0 0 0 0 0 0 0 0 1 0 0 0 0 0 0 0 0 0 0 0 0 0 0 0 0 0 0 0 0 0 0 0 0 0 0 0 0
```



cla  
ssi  
fie  
d  
d\_  
Bac  
ter  
ia|  
p\_  
Fir  
mic  
ute  
s|c  
\_C  
los  
tri  
dia  
|o\_  
\_Os  
cil  
los  
pir  
ale  
s|f  
\_O  
sci  
llo  
spi  
rac  
eae  
|g\_  
\_In

tes 0 0 0 0 1 0 0 0 0 1 1 0 0 0 0 0 0 0 0 0 0 0 0 0 0 0 0 0 0 0 0 0 0 0 0 0 0 0  
tin . . . . .  
imo 0 3 2 0 2 7 6 0 4 2 1 0 1 1 4 0 0 3 4 0 3 2 9 1 0 2 1 1 7 1 2 0  
nas 4 0 0 2 8 4 9 8 5 4 2 7 4 1 1 5 9 5 4 3 5 0 8 3 0 8 2 2 0 7 5 4 8 3

d\_  
Bac  
ter  
ia|

p\_ 0 0 0 0 1 0 0 0 0 1 1 0 0 0 0 0 0 0 0 0 0 0 0 0 0 0 0 0 0 0 0 0 0 0 0 0 0 0  
Fir . . . . .  
mic 0 3 2 0 2 7 6 0 4 2 1 0 1 1 4 0 0 3 4 0 3 2 9 1 0 2 1 1 7 1 2 0  
ute 4 0 0 2 8 4 9 8 5 4 2 7 4 1 1 5 9 5 4 3 5 0 8 3 0 8 2 2 0 7 5 4 8 3

```

s|c
__C
los
tri
dia
lo_
_Os
cil
los
pir
ale
s|f
__O
sci
llo
spi
rac
eae
lg_
_In
tes
tin
imo
nas
|s_
_In
tes
tin
imo
nas
_un
cla
ssi
fie
d
d__
Bac
ter
ia|
p__
Fir          0    0  00    00  0  000  0000  00
mic          .    .  ..    ..  .  ...  ....  ..
ute          0    0  00    00  0  000  0000  00
s|c 0000000001001010004201013102110011

```

\_\_C  
los  
tri  
dia  
|o\_  
\_Os  
cil  
los  
pir  
ale  
s|f  
\_\_O  
sci  
llo  
spi  
rac  
eae  
|g\_  
\_NK  
4A2  
14\_  
gro  
up  
d\_\_  
Bac  
ter  
ial  
p\_\_  
Fir  
mic  
ute  
s|c  
\_\_C  
los  
tri  
dia  
|o\_  
\_Os  
cil  
los  
pir  
ale  
s|f  
\_\_O

0 0 00 00 0 000 0000 00  
.  
0 0 00 00 0 000 0000 00  
0 0 0 0 1 0 1 0 0 0 4 2 0 1 0 1 3 1 0 2 1 1 0 0 1 1

```
sci  
llo  
spi  
rac  
eae  
lg_  
_NK  
4A2  
14_  
gro  
up|  
s__  
NK4  
A21  
4_g  
rou  
p_u  
ncl  
ass  
ifi  
ed  
d__  
Bac  
ter  
ia|  
p__  
Fir  
mic  
ute  
s|c  
__C  
los  
tri  
dia  
|o_  
_Os  
cil  
los  
pir  
ale  
s|f      0 0 0 0 0 0 0 0 1 0 0 0 0 0 0 0 0 0 0 0 0 0 0 0 0 0 0 0 0 0 0 0 0 0 0  
__O      . . . . . . . . . . . . . . . . . . . . . . . . . . . . . . . . .  
sci      2 0 0 0 0 0 2 0 8 1 0 0 0 0 0 0 0 0 0 0 0 0 0 0 0 0 0 0 0 0 0 0 0 0 0  
llo      0 0 1 8 2 3 5 9 6 4 0 1 1 2 2 2 1 1 5 3 3 0 3 0 7 0 0 0 4 1 6 9 1 0
```

spi  
 rac  
 eae  
 lg\_  
 \_Os  
 cil  
 lib  
 act  
 er  
 d\_\_  
 Bac  
 ter  
 ial  
 p\_\_  
 Fir  
 mic  
 ute  
 s|c  
 \_\_C  
 los  
 tri  
 dia  
 lo\_  
 \_Os  
 cil  
 los  
 pir  
 ale  
 s|f  
 \_\_O  
 sci  
 llo  
 spi  
 rac  
 eae  
 lg\_  
 \_Os  
 cil  
 lib  
 act

er|        0 0 0 0 0 0 0 0 1 0 0 0 0 0 0 0 0 0 0 0    0    0 0    0 0 0 0 0 0  
 s\_\_        . . . . . . . . . . . . . . . . . . . . . . . . . . . . . . . . . . . . . . . .  
 Osc        2 0 0 0 0 0 2 0 8 1 0 0 0 0 0 0 0 0 0 0    0    0 1    1 0 0 0 0 0  
 ill 0 0 1 8 2 3 5 9 6 4 0 1 1 2 2 2 1 1 5 3 3 0 3 0 7 0 0 0 4 1 6 9 1 0

```

iba
cte
r_u
ncl
ass
ifi
ed
d__
Bac
ter
ia|
p__
Fir
mic
ute
s|c
__C
los
tri
dia
|o_
_Os
cil
los
pir
ale
s|f
__O
sci
llo
spi
rac
eae
|g_
_Os
cil
los
pir
ace
ae_
unc 0 0 0 0 0 0 0 0 0 0 1 0 0 0 0 0 0 0 0 0 0 0 0 0 0 0 0 0 1 0 1 0 1 2 1 0 0
las . . . . .
sif 0 0 4 1 0 1 1 1 2 0 8 0 0 0 0 0 0 3 1 0 0 0 3 2 8 0 0 0 2 8 3 4 0 1
ied 7 3 2 5 6 1 0 3 3 5 6 7 3 1 2 2 8 9 0 3 1 1 0 5 2 8 9 2 0 9 9 9 6 2

```

d\_\_  
Bac  
ter  
ia|  
p\_\_  
Fir  
mic  
ute  
s|c  
\_\_C  
los  
tri  
dia  
|o\_  
\_Os  
cil  
los  
pir  
ale  
s|f  
\_\_O  
sci  
llo  
spi  
rac  
eae  
|g\_  
\_Os  
cil  
los  
pir  
ace  
ae\_  
unc  
las  
sif  
ied  
|s\_  
\_Os  
cil  
los 0 0 0 0 0 0 0 0 0 0 1 0 0 0 0 0 0 0 0 0 0 0 0 0 0 0 0 0 1 0 1 0 1 2 1 0 0  
pir . . . . .  
ace 0 0 4 1 0 1 1 1 2 0 8 0 0 0 0 0 0 3 1 0 0 0 3 2 8 0 0 0 2 8 3 4 0 1  
ae\_ 7 3 2 5 6 1 0 3 3 5 6 7 3 1 2 2 8 9 0 3 1 1 0 5 2 8 9 2 0 9 9 9 6 2





```

s|c
__C
los
tri
dia
|o_
_Os
cil
los
pir
ale
s|f
__O
sci
llo
spi
rac
eae
|g_
_Pa
pil
lib
act
er|
s__
Pap
ill
iba
cte
r_u
ncl
ass
ifi
ed
d__
Bac
ter
ia|
p__
Fir
mic          0    0    0 0 0 0 0 0    0    0 0 0    0 0
ute          .    .    . . . . .    .    . . .    . .
s|c          0    0    0 0 0 0 0 0    0    0 0 0    0 0
__C 0 0 0 0 0 0 0 0 0 0 0 0 0 3 0 0 1 0 0 2 3 3 3 2 2 0 0 4 0 3 2 2 0 2 1

```

```

los
tri
dia
lo_
_Os
cil
los
pir
ale
s|f
__O
sci
llo
spi
rac
eae
lg_
_UC
G-
002
d__
Bac
ter
ia|
p__
Fir
mic
ute
s|c
__C
los
tri
dia
lo_
_Os
cil
los
pir
ale
s|f
__O          0    0    0 0 0 0 0 0    0    0 0 0    0 0
sci          .    .    . . . . . .    .    . . .    . .
llo          0    0    0 0 0 0 0 0    0    0 0 0    0 0
spi 0 0 0 0 0 0 0 0 0 0 0 0 0 3 0 0 1 0 0 2 3 3 3 2 2 0 0 4 0 3 2 2 0 2 1

```



003

d\_\_

Bac

ter

ia|

p\_\_

Fir

mic

ute

s|c

\_C

los

tri

dia

lo\_

\_Os

cil

los

pir

ale

s|f

\_O

sci

llo

spi

rac

eae

lg\_

\_UC

G-

003

ls\_

\_UC

G-

003

\_un

cla      0

ssi      .

fie      0

d    0 0 6 0 0 0 0 0 0 0 0 0 0 0 0 0 0 0 0 0 0 0 0 0 0 0 0 0 0 0 0 0 0 0 0 0 0 0 0 0 0 0 0 0 0 0 0 0 0 0 0 0 0

d\_\_ 0 0 0 0 0 0    0 0 0 0 0 0    0 0 0 0 0 0    0 0 0 0 0 0 0 0 0 0 0 0 0 0 0 0 0 0 0 0 0 0 0 0 0 0 0 0 0 0 0 0

Bac . . . . .    . . . . .    . . . . .    . . . . .

ter 0 0 0 0 0 0    0 0 0 5 1 0    0 0 0 0 0 0    0 0 0 0 0 0 0 0 0 0 0 0 0 0 0 0 0 0 0 0 0 0 0 0 0 0 0 0 0 0 0 0 0 0 0 0 0 0 0 0 0 0

ia| 1 1 3 2 5 4 0 5 6 3 8 3 4 0 2 5 1 5 4 5 0 2 6 4 5 4 2 5 1 2 6 5 6 2

p\_\_  
 Fir  
 mic  
 ute  
 s|c  
 \_\_C  
 los  
 tri  
 dia  
 lo\_  
 \_Os  
 cil  
 los  
 pir  
 ale  
 s|f  
 \_\_O  
 sci  
 llo  
 spi  
 rac  
 eae  
 lg\_  
 \_UC  
 G-  
 005  
 d\_\_  
 Bac  
 ter  
 ial  
 p\_\_  
 Fir  
 mic  
 ute  
 s|c  
 \_\_C  
 los  
 tri  
 dia  
 lo\_  
 \_Os  
 cil  
 los  
 pir

|     |               |               |               |                               |
|-----|---------------|---------------|---------------|-------------------------------|
| _Os | 0 0 0 0 0 0   | 0 0 0 0 0 0   | 0 0 0 0 0 0   | 0 0 0 0 0 0 0 0 0 0 0 0 0 0 0 |
| cil | . . . . .     | . . . . .     | . . . . .     | . . . . .                     |
| los | 0 0 0 0 0 0   | 0 0 0 5 1 0   | 0 0 0 0 0 0   | 0 0 0 0 0 0 0 0 0 0 0 0 0 0   |
| pir | 1 1 3 2 5 4 0 | 5 6 3 8 3 4 0 | 2 5 1 5 4 5 0 | 2 6 4 5 4 2 5 1 2 6 5 6 2     |











cil  
los  
pir  
ale  
s|f  
\_\_0  
sci  
llo  
spi  
ral  
es\_  
unc  
las  
sif  
ied  
lg\_  
\_Os  
cil  
los  
pir  
ale  
s\_u  
ncl  
ass  
ifi  
ed|  
s\_\_  
Osc  
ill  
osp  
ira  
les  
\_un  
cla  
ssi  
fie  
d  
d\_\_  
Bac  
ter

2 1 4 2

ia| 0 0 8 0 6 0 0 1 2 1 4 2 8 0 7 1 4 0 8 4 9 0 1 0 0 1 0 0 0 0 0 1 4 0

p\_\_ . . . . .

Fir 2 3 4 9 0 8 6 0 6 0 8 6 8 6 9 7 6 5 0 6 3 2 6 3 9 0 2 9 7 3 4 2 5 5

mic 9 4 6 3 2 7 5 2 6 8 4 5 2 2 9 3 1 7 4 3 1 9 9 0 9 1 4 3 3 7 6 0 5 0





sif  
ied  
d\_\_  
Bac  
ter  
ia|  
p\_\_  
Fir  
mic  
ute  
s|c  
\_\_C  
los  
tri  
dia  
|o\_  
\_Os  
cil  
los  
pir  
ale  
s|f  
\_\_R  
umi  
noc  
occ  
ace  
ae|  
g\_\_

Ana

ero 0 0000000000000000000000000000000000000000000000000000000  
tru . . . . .  
ncu 0 3011053061000000000110203001000140  
s 2078261026054394458035011426639329

d\_\_

Bac

ter

ia|

p\_\_

Fir

mic

ute

s|c

\_\_C

0 0000000000000000000000000000000000000000000000000000000  
. . . . .  
0 3011053061000000000110203001000140  
2078261026054394458035011426639329  
0 3011053061000000000110203001000140  
2078261026054394458035011426639329





```

g__
CAG
-
352
|s_
_CA
G-
352
_un
cla
ssi
fie
d
d__
Bac
ter
ial
p__
Fir
mic
ute
s|c
__C
los
tri
dia
|o_
_Os
cil
los
pir
ale
s|f
__R
umi
noc
occ
ace
ae|
g__
Can          0          0    0          0  0 0 0 0 0 0 0 0
did          .          .    .          .  . . . . .  .  .
atu          0          0    0          0  0 0 0 0 0 0 0 0
s_S 0 0 0 0 0 0 0 0 0 0 0 0 0 1 0 0 0 0 0 0 0 0 0 0 0 1 0 1 0 0 0 1 0

```



```

ole
afe
rre
a
d__
Bac
ter
ia|
p__
Fir
mic
ute
s|c
__C
los
tri
dia
|o_
_Os
cil
los
pir
ale
s|f
__R
umi
noc
occ
ace
ae|
g__
Can
did
atu
s_S
ole
afe
rre
a|s
__C
and          0          0  0          0  0 0 0 0  0  0
ida          .          .  .          .  . . . .  .  .
tus          0          0  0          0  0 0 0 0  0  0
_So  0 0 0 0 0 0 0 0 0 0 0 0 1 0 0 0 0 0 0 0 0 0 0 0 0 0 1 0 1 0 0 0 1 0

```

lea  
fer  
rea  
\_un  
cla  
ssi  
fie  
d  
d\_\_  
Bac  
ter  
ial  
p\_\_  
Fir  
mic  
ute  
s|c  
\_\_C  
los  
tri  
dia  
|o\_  
\_Os  
cil  
los  
pir  
ale  
s|f  
\_\_R  
umi  
noc  
occ  
ace  
ae|  
g\_\_  
Eub  
act  
eri  
um]

\_si  
rae 0 0 0 0 0 0 1 0 0 0 0 0 0 0 0 0 0 0 0 0 0 0 0 0 0 0 0 0 0 0  
um\_ . . . . . . . . . . . . . . . . . . . . . . . . . . . . . .  
gro 1 2 0 0 0 7 6 5 0 1 0 3 1 1 0 0 5 0 0 0 2 1 0  
up 0 7 0 0 1 1 1 0 0 5 4 9 5 2 4 2 9 3 2 2 0 1 4 4 8 0 0 9 0 0 0 2 0 1

```

d__
Bac
ter
ia|
p__
Fir
mic
ute
s|c
__C
los
tri
dia
|o_
_Os
cil
los
pir
ale
s|f
__R
umi
noc
occ
ace
ae|
g__
Eub
act
eri
um]
_si
rae
um_
gro
up|
s__
Eub
act
eri
um]  0      0 0 0      0 0 1 0 0 0 0 0 0 0 0 0      0 0 0 0      0 0      0  0
_si  .      . . .      . . . . . . . . . . . .      . . . . .      . .      .  .
rae  1      2 0 0      0 7 6 5 0 1 0 3 1 1 0      0 5 0 0      0 2      1  0
um_  0 7 0 0 1 1 1 0 0 5 4 9 5 2 4 2 9 3 2 2 0 1 4 4 8 0 0 9 0 0 0 2 0 1

```

gro  
up\_  
unc  
las  
sif  
ied  
d\_\_  
Bac  
ter  
ial  
p\_\_  
Fir  
mic  
ute  
s|c  
\_\_C  
los  
tri  
dia  
|o\_  
\_Os  
cil  
los  
pir  
ale  
s|f  
\_\_R  
umi  
noc  
occ  
ace  
ael  
g\_\_  
Fae  
cal  
iba  
cte  
riu  
m  
d\_\_  
Bac  
ter  
ial  
p\_\_

```
0 0 0 0 0 0 0 0 0 0 0 0 0 3 2 2 3 1 1 0 4 3 8 7 4 5 3 6 4 5 5 4 4 3 4  
. . . . . . . . . . . . . . . . . . . . . . . . . . . . . . . . . . . . .  
0 0 0 0 0 0 0 0 0 0 0 0 0 3 2 2 3 1 1 0 4 3 8 7 4 5 3 6 4 5 5 4 4 3 4  
0 0 0 0 0 0 0 0 0 0 0 0 0 3 2 2 3 1 1 0 4 3 8 7 4 5 3 6 4 5 5 4 4 3 4
```





```

ale
s|f
__R
umi
noc
occ
ace
ae|
g__
Fou
rni
ere
lla
|s_
_Fo
urn
ier
ell
a_u
ncl
ass
ifi
ed
d__
Bac
ter
ia|
p__
Fir
mic
ute
s|c
__C
los
tri
dia
|o_
_Os
cil
los
pir      0      0 0      0 0 0      0 0 0      0 0      0      0 0 0 0      0      0 0
ale      .      . .      . . .      . .      .      . . .      .      . .
s|f      0      0 0      0 0 0      0 0 0      0 0      0      0 0 0 0      0      0 0
__R 0 0 0 0 3 0 0 3 4 0 9 2 0 0 1 2 1 0 3 3 0 0 0 1 2 2 0 1 0 0 1 1 0 0

```

```

umi
noc
occ
ace
ae|
g__
Har
ryf
lin
tia
d__
Bac
ter
ia|
p__
Fir
mic
ute
s|c
__C
los
tri
dia
|o_
_Os
cil
los
pir
ale
s|f
__R
umi
noc
occ
ace
ae|
g__
Har
ryf
lin
tia      0      0 0      0 0 0      0 0 0      0 0      0      0 0 0 0      0      0 0
|s_      .      . .      . . .      . . .      . .      .      . . .      .      . .
_Ha      0      0 0      0 0 0      0 0 0      0 0      0      0 0 0 0      0      0 0
rry 0 0 0 0 3 0 0 3 4 0 9 2 0 0 1 2 1 0 3 3 0 0 0 1 2 2 0 1 0 0 1 1 0 0

```





Fir  
mic  
ute  
s|c  
\_\_C  
los  
tri  
dia  
|o\_  
\_Os  
cil  
los  
pir  
ale  
s|f  
\_\_R  
umi  
noc  
occ  
ace  
ae|  
g\_\_  
Inc  
ert  
ae\_  
Sed  
is|  
s\_\_  
Inc  
ert  
ae\_  
Sed  
is\_  
unc  
las  
sif  
ied  
d\_\_  
Bac  
ter

|     |   |    |      |      |    |    |      |       |                 |
|-----|---|----|------|------|----|----|------|-------|-----------------|
| ia  | 0 | 00 | 0000 | 0000 | 0  | 0  | 0000 | 00    | 000             |
| p__ | . | .  | ..   | ..   | .  | .  | ..   | ..    | ..              |
| Fir | 0 | 00 | 0000 | 0000 | 0  | 0  | 0000 | 00    | 000             |
| mic | 0 | 05 | 103  | 133  | 06 | 31 | 110  | 10000 | 030115103100210 |

ute  
s|c  
\_\_C  
los  
tri  
dia  
lo\_  
\_Os  
cil  
los  
pir  
ale  
s|f  
\_\_R  
umi  
noc  
occ  
ace  
ae|  
g\_\_  
Neg  
ati  
vib  
aci  
llu  
s  
d\_\_  
Bac  
ter  
ia|  
p\_\_  
Fir  
mic  
ute  
s|c  
\_\_C  
los  
tri  
dia  
lo\_  
\_Os  
cil  
los  
pir

|                                     |    |      |      |   |   |      |    |     |
|-------------------------------------|----|------|------|---|---|------|----|-----|
| 0                                   | 00 | 0000 | 0000 | 0 | 0 | 0000 | 00 | 000 |
| .                                   | .  | ..   | ..   | . | . | ..   | .. | ..  |
| 0                                   | 00 | 0000 | 0000 | 0 | 0 | 0000 | 00 | 000 |
| 00510313306311010000030115103100210 |    |      |      |   |   |      |    |     |









Fir  
mic  
ute  
s|c  
\_\_C  
los  
tri  
dia  
|o\_  
\_Os  
cil  
los  
pir  
ale  
s|f  
\_\_R  
umi  
noc  
occ  
ace  
ae|  
g\_\_  
Rum  
ino  
coc  
cac  
eae  
\_un  
cla  
ssi  
fie  
d  
d\_\_  
Bac  
ter  
ia|  
p\_\_  
Fir  
mic

ute 2 1 4 2  
s|c 0 0 6 0 5 0 0 0 0 0 2 0 8 0 7 1 4 0 7 4 8 0 0 0 0 0 0 0 0 0 0 0 0 0 0 0 0 0 0 0 0 3 0  
\_\_C . . . . .  
los 1 0 8 7 4 4 1 3 1 7 0 3 0 4 6 5 0 3 6 3 9 0 6 1 1 0 0 0 4 0 0 0 6 1  
tri 4 7 7 0 3 5 7 7 8 5 2 1 9 2 3 3 1 3 2 2 3 9 6 1 2 8 7 9 4 8 6 7 1 1



dia  
lo\_  
\_Os  
cil  
los  
pir  
ale  
s|f  
\_\_R  
umi  
noc  
occ  
ace  
ae|  
g\_\_  
Rum  
ino  
coc  
cac  
eae  
\_un  
cla  
ssi  
fie  
d|s  
\_\_R  
umi  
noc  
occ  
ace  
ae\_  
unc  
las  
sif  
ied  
d\_\_  
Bac  
ter  
ia|

p\_  
Fir 0 0 1 0 0 0 0 0 1 0 0 0 0 0 0 0 0 0 0 0 0 0 0 0 0 0 0 0 0 0 0 0 0 0 0 0  
mic . . . . . . . . . . . . . . . . . . . . . . . . . . . . . . . . . . . . . . . . . . .  
ute 1 0 0 1 0 0 1 0 9 2 1 1 0 1 0 0 0 0 0 0 0 0 0 1 0 1 5 0 2 0 0 1 6 3 2  
s|c 1 8 0 0 4 3 8 2 3 0 0 6 5 1 5 5 5 4 2 4 1 3 8 5 1 8 3 3 5 7 5 8 9 3

```
__C
los
tri
dia
|o_
_Os
cil
los
pir
ale
s|f
__R
umi
noc
occ
ace
ae|
g__
Rum
ino
coc
cus
d__
Bac
ter
ia|
p__
Fir
mic
ute
s|c
__C
los
tri
dia
|o_
_Os
cil
los
pir
ale 0 0 1 0 0 0 0 0 1 0 0 0 0 0 0 0 0 0 0 0 0 0 0 0 0 0 0 0 0 0
s|f . . . . .
__R 1 0 0 1 0 0 1 0 9 2 1 1 0 1 0 0 0 0 0 0 0 1 0 1 5 0 2 0 0 1 6 3 2
umi 1 8 0 0 4 3 8 2 3 0 0 6 5 1 5 5 5 4 2 4 1 3 8 5 1 8 3 3 5 7 5 8 9 3
```

```

noc
occ
ace
ae|
g__
Rum
ino
coc
cus
|s_
_Ru
min
oco
ccu
s_u
ncl
ass
ifi
ed
d__
Bac
ter
ia|
p__
Fir
mic
ute
s|c
__C
los
tri
dia
|o_
_Os
cil
los
pir
ale
s|f
__R
umi          0 0 0 0      0      0 0 0 0 0 0 0 0 0 0
noc          . . . .      .      . . . . . . . . . .
occ          0 0 0 0      0      0 0 0 0 0 0 0 0 0 0
ace 0 0 0 0 0 0 0 0 0 0 0 0 0 0 0 0 1 1 1 1 0 0 0 1 0 0 1 2 2 1 1 2 1 1 0 1

```



```

ulu
m_u
ncl
ass
ifi
ed
d__
Bac
ter
ia|
p__
Fir
mic
ute
s|c
__C
los
tri
dia
|o_
_Os
cil
los
pir
ale
s|f
__R
umi
noc
occ
ace
ae|
g__      0 0  0  0  0 0 0      0          0 0 0 0 0 0 0 0
UBA      . .  .  .  . . .      .          . . . . . . . .
181      0 0  0  0  0 7 0      0          0 0 0 0 0 0 0 0
9        0 0 2 1 0 4 0 0 0 0 0 2 0 0 0 1 0 0 0 0 0 0 0 0 0 8 7 2 1 5 5 4 1 0 0
d__
Bac
ter
ia|
p__      0 0  0  0  0 0 0      0          0 0 0 0 0 0 0 0
Fir      . .  .  .  . . .      .          . . . . . . . .
mic      0 0  0  0  0 7 0      0          0 0 0 0 0 0 0 0
ute      0 0 2 1 0 4 0 0 0 0 0 2 0 0 0 1 0 0 0 0 0 0 0 0 0 8 7 2 1 5 5 4 1 0 0

```





ia| 1 0 3 1 1 3 3 2 8 6 2 4 1 1 9 1 1 4 3 0 4 1 8 9 5 0 7 3 4

p\_\_  
Fir  
mic  
ute  
s|c  
\_\_C  
los  
tri  
dia  
lo\_  
\_Os  
cil  
los  
pir  
ale  
s|f  
\_\_U  
CG-  
010  
lg\_  
\_UC  
G-  
010  
\_un  
cla  
ssi  
fie  
d|s  
\_\_U  
CG-  
010  
\_un  
cla  
ssi  
fie  
d  
d\_\_  
Bac  
ter

ia| 0 0 0 0 0 0 0 0 0 0 0 0 0 0 0 0 0 0 0 0 0 0 0 0 0 0 0  
p\_\_ . . . . . . . . . . . . . . . . . . . . . . . . . . . . . . . .  
Fir 7 0 0 1 1 2 1 0 3 0 0 0 0 0 0 0 0 0 0 0 0 0 0 0 0 0 0 1 0 0  
mic 0 0 4 6 2 1 6 0 4 1 5 3 0 3 4 0 3 0 0 7 7 1 1 0 3 2 1 4 7 7 5 6 8 1



ute  
s|c  
\_\_C  
los  
tri  
dia  
|o\_  
\_Pe  
pto  
coc  
cal  
es  
d\_\_  
Bac  
ter  
ia|  
p\_\_  
Fir  
mic  
ute  
s|c  
\_\_C  
los  
tri  
dia  
|o\_  
\_Pe  
pto  
coc  
cal  
es|  
f\_\_  
Pep  
toc 0 0 0 0 0 0 0 0 0 0 0 0 0 0 0 0 0 0 0 0 0 0 0 0 0 0 0 0 0 0 0 0 0 0 0 0  
occ . . . . . . . . . . . . . . . . . . . . . . . . . . . . . . . . . . . . . . . . . . . . . .  
ace 7 0 0 1 1 2 1 0 3 0 0 0 0 0 0 0 0 0 0 0 0 0 0 0 0 0 0 0 0 0 0 0 0 1 0 0  
ae 0 0 4 6 2 1 6 0 4 1 5 3 0 3 4 0 3 0 0 7 7 1 1 0 3 2 1 4 7 7 5 6 8 1  
d\_\_  
Bac  
ter  
ia| 0 0 0 0 0 0 0 0 0 0 0 0 0 0 0 0 0 0 0 0 0 0 0 0 0 0 0 0 0 0 0 0 0 0 0 0  
p\_\_ . . . . . . . . . . . . . . . . . . . . . . . . . . . . . . . . . . . . . . . . . . . . . .  
Fir 7 0 0 0 1 1 0 0 3 0 0 0 0 0 0 0 0 0 0 0 0 0 0 0 0 0 0 0 0 0 0 0 0 0 0 0  
mic 0 0 4 6 1 9 6 8 8 1 3 3 0 3 4 0 3 0 0 7 6 1 1 0 3 0 1 3 4 7 5 9 4 0

ute  
 s|c  
 \_\_C  
 los  
 tri  
 dia  
 |o\_  
 \_Pe  
 pto  
 coc  
 cal  
 es|  
 f\_\_  
 Pep  
 toc  
 occ  
 ace  
 ae|  
 g\_\_  
 Pep  
 toc  
 occ  
 ace  
 ae\_  
 unc  
 las  
 sif  
 ied  
 d\_\_  
 Bac  
 ter  
 ia|  
 p\_\_  
 Fir  
 mic  
 ute  
 s|c  
 \_\_C  
 los  
 tri  
 dia  
 |o\_  
 \_Pe  
 pto

|     |   |   |   |   |   |   |   |   |   |   |   |   |   |   |   |   |   |   |   |   |   |   |   |   |   |   |   |   |   |   |   |   |   |   |   |   |   |   |
|-----|---|---|---|---|---|---|---|---|---|---|---|---|---|---|---|---|---|---|---|---|---|---|---|---|---|---|---|---|---|---|---|---|---|---|---|---|---|---|
| dia | 0 | 0 | 0 | 0 | 0 | 0 | 0 | 0 | 0 | 0 | 0 | 0 | 0 | 0 | 0 | 0 | 0 | 0 | 0 | 0 | 0 | 0 | 0 | 0 | 0 | 0 | 0 | 0 | 0 | 0 | 0 | 0 | 0 | 0 | 0 | 0 | 0 | 0 |
| o_  | . | . | . | . | . | . | . | . | . | . | . | . | . | . | . | . | . | . | . | . | . | . | . | . | . | . | . | . | . | . | . | . | . | . | . | . | . | . |
| _Pe | 7 | 0 | 0 | 0 | 1 | 1 | 0 | 0 | 3 | 0 | 0 | 0 | 0 | 0 | 0 | 0 | 0 | 0 | 0 | 0 | 0 | 0 | 0 | 0 | 0 | 0 | 0 | 0 | 0 | 0 | 0 | 0 | 0 | 0 | 0 | 0 | 0 |   |
| pto | 0 | 0 | 4 | 6 | 1 | 9 | 6 | 8 | 8 | 1 | 3 | 3 | 0 | 3 | 4 | 0 | 3 | 0 | 0 | 7 | 6 | 1 | 1 | 0 | 3 | 0 | 1 | 3 | 4 | 7 | 5 | 9 | 4 | 0 |   |   |   |   |

```

coc
cal
es|
f__
Pep
toc
occ
ace
ae|
g__
Pep
toc
occ
ace
ae_
unc
las
sif
ied
|s_
_Pe
pto
coc
cac
eae
_un
cla
ssi
fie
d
d__
Bac
ter
ial
p__
Fir
mic
ute
s|c
__C
los      0 0 0 0 0 0 0 0      0 0      0 0 0 0 0 0 0
tri      . . . . . . .      . .      . . . . . . .
dia      0 0 0 0 0 0 0 0      0 0      0 0 0 0 0 0 0
|o_     0 0 1 0 0 2 0 2 5 0 2 0 0 0 0 0 0 0 0 1 0 0 0 0 0 1 0 1 3 0 0 7 4 1

```

```

_Pe
pto
coc
cal
es|
f__
Pep
toc
occ
ace
ae|
g__
Pep
toc
occ
us
d__
Bac
ter
ial|
p__
Fir
mic
ute
s|c
__C
los
tri
dia
|o_
_Pe
pto
coc
cal
es|
f__
Pep
toc
occ
ace
ae|      0 0 0 0 0 0 0 0      0      0      0 0 0 0 0 0 0
g__      . . . . . . .      .      .      . . . . . . .
Pep      0 0 0 0 0 0 0 0      0      0      0 0 0 0 0 0 0
toc 0 0 1 0 0 2 0 2 5 0 2 0 0 0 0 0 0 0 0 0 0 0 1 0 0 0 0 1 0 1 3 0 0 7 4 1

```







-

Tis  
sie  
rel  
lal  
es|  
f\_\_  
Ana  
ero  
vor  
aca  
cea  
e|g  
\_\_A  
nae  
rov  
ora  
x|s  
\_\_A  
nae  
rov  
ora  
x\_u  
ncl  
ass  
ifi  
ed  
d\_\_  
Bac  
ter  
ia|  
p\_\_  
Fir  
mic  
ute  
s|c  
\_\_C  
los  
tri  
dia

|     |                                                                       |   |     |   |  |   |   |       |   |       |             |
|-----|-----------------------------------------------------------------------|---|-----|---|--|---|---|-------|---|-------|-------------|
| o_  | 0 0                                                                   | 0 | 0 0 | 0 |  | 0 | 0 | 0 0 0 | 0 | 0 0 0 | 0 0 0 0 0 0 |
| _Pe | .                                                                     | . | .   | . |  | . | . | .     | . | .     | .           |
| pto | 0 0                                                                   | 0 | 0 0 | 0 |  | 0 | 0 | 0 0 0 | 0 | 0 0 0 | 0 0 0 0 0 0 |
| str | 0 1 2 0 4 0 1 1 0 0 0 0 0 0 0 3 0 4 0 4 3 2 0 1 0 3 4 1 0 3 2 5 5 4 2 |   |     |   |  |   |   |       |   |       |             |



```

ept
oco
cca
les
-
Tis
sie
rel
lal
es|
f__
Ana
ero
vor
aca
cea
e|g
__E
uba
cte
riu
m]_
bra
chy
_gr
oup
d__
Bac
ter
ial
p__
Fir
mic
ute
s|c
__C
los
tri
dia
lo_
_Pe  0 0  0  0 0  0          0  0  0 0 0  0  0 0 0  0 0 0 0 0 0 0
pto  . .  .  . .  .          .  .  . . .  .  . . .  . . . . .
str  0 0  0  0 0  0          0  0  0 0 0  0  0 0 0  0 0 0 0 0 0 0
ept  0 1 2 0 4 0 1 1 0 0 0 0 0 0 0 3 0 4 0 4 3 2 0 1 0 3 4 1 0 3 2 5 5 4 2

```

oco  
 cca  
 les  
 -  
 Tis  
 sie  
 rel  
 lal  
 es|  
 f\_\_  
 Ana  
 ero  
 vor  
 aca  
 cea  
 e|g  
 \_\_E  
 uba  
 cte  
 riu  
 m]\_  
 bra  
 chy  
 \_gr  
 oup  
 |s\_  
 \_Eu  
 bac  
 ter  
 ium  
 ]\_b  
 rac  
 hy\_  
 gro  
 up\_  
 unc  
 las  
 sif  
 ied

d\_\_  
 Bac            0    0 0 0 0 0 0    0            0    0 0 0 0            0 0            0 0            0 0  
 ter            .    . . . . . .    .            .    . . . .            . .            . .            . .  
 ia|            0    0 0 0 0 0 0    0            0    0 0 0 0            0 0            0 0            0 0  
 p\_\_    0 0 6 0 1 8 3 5 4 1 0 2 0 0 0 1 0 1 1 1 2 0 0 1 1 0 0 1 1 0 0 1 2 0

Fir  
mic  
ute  
s|c  
\_\_C  
los  
tri  
dia  
|o\_  
\_Pe  
pto  
str  
ept  
oco  
cca  
les  
-  
Tis  
sie  
rel  
lal  
es|  
f\_\_  
Ana  
ero  
vor  
aca  
cea  
e|g  
\_\_E  
uba  
cte  
riu  
m]\_  
nod  
atu  
m\_g  
rou  
p  
d\_\_

|     |   |   |   |   |   |   |   |   |   |   |   |   |   |   |   |   |   |   |   |   |   |   |   |   |   |   |   |   |   |   |   |   |   |   |
|-----|---|---|---|---|---|---|---|---|---|---|---|---|---|---|---|---|---|---|---|---|---|---|---|---|---|---|---|---|---|---|---|---|---|---|
| Bac | 0 | 0 | 0 | 0 | 0 | 0 | 0 | 0 | 0 | 0 | 0 | 0 | 0 | 0 | 0 | 0 | 0 | 0 | 0 | 0 | 0 | 0 | 0 | 0 | 0 | 0 |   |   |   |   |   |   |   |   |
| ter | . | . | . | . | . | . | . | . | . | . | . | . | . | . | . | . | . | . | . | . | . | . | . | . | . | . | . |   |   |   |   |   |   |   |
| ia  | 0 | 0 | 0 | 0 | 0 | 0 | 0 | 0 | 0 | 0 | 0 | 0 | 0 | 0 | 0 | 0 | 0 | 0 | 0 | 0 | 0 | 0 | 0 | 0 | 0 | 0 |   |   |   |   |   |   |   |   |
| p__ | 0 | 0 | 6 | 0 | 1 | 8 | 3 | 5 | 4 | 1 | 0 | 2 | 0 | 0 | 0 | 1 | 0 | 1 | 1 | 1 | 2 | 0 | 0 | 1 | 1 | 0 | 0 | 1 | 1 | 0 | 0 | 1 | 2 | 0 |

Fir  
mic  
ute  
s|c  
\_\_C  
los  
tri  
dia  
|o\_  
\_Pe  
pto  
str  
ept  
oco  
cca  
les  
-  
Tis  
sie  
rel  
lal  
es|  
f\_\_  
Ana  
ero  
vor  
aca  
cea  
e|g  
\_\_E  
uba  
cte  
riu  
m]\_  
nod  
atu  
m\_g  
rou  
p|s  
\_\_E  
uba  
cte  
riu  
m]\_

```

nod
atu
m_g
rou
p_u
ncl
ass
ifi
ed
d__
Bac
ter
ia|
p__
Fir
mic
ute
s|c
__C
los
tri
dia
|o_
_Pe
pto
str
ept
oco
cca
les
-
Tis
sie
rel
lal
es|
f__
Ana
ero
vor
aca      0 0  0 0          0  0 0          0   0 0  0 0 0 0 0
cea      . .  . .          .  . .          .   . .  . . . . .
e|g      1 0  0 0          0  0 0          0   0 0  0 0 0 0 0
__F 0 0 0 1 0 1 1 0 0 0 0 0 1 0 1 2 0 0 0 0 0 1 0 0 3 2 0 1 1 2 1 2 0 0

```

```

ami
ly_
XII
I_A
D30
11_
gro
up
d__
Bac
ter
ial
p__
Fir
mic
ute
s|c
__C
los
tri
dia
|o_
_Pe
pto
str
ept
oco
cca
les
-
Tis
sie
rel
lal
es|
f__
Ana
ero
vor
aca
cea      0 0  0 0          0  0 0          0  0 0  0 0 0 0 0
elg      . .  . .          .  . .          .  . .  . . . . .
__F      1 0  0 0          0  0 0          0  0 0  0 0 0 0 0
ami 0 0 0 1 0 1 1 0 0 0 0 0 1 0 1 2 0 0 0 0 0 1 0 0 3 2 0 1 1 2 1 2 0 0

```

```

ly_
XII
I_A
D30
11_
gro
up|
s__
Fam
ily
_XI
II_
AD3
011
_gr
oup
_un
cla
ssi
fie
d
d__
Bac
ter
ia|
p__
Fir
mic
ute
s|c
__C
los
tri
dia
|o_
_Pe
pto
str
ept
oco
cca      0  0 0 0 0 0  0 0  0 0  0 0  0 0  0 0
les      .  . . . . .  . .  . .  . .  . .  . .  . .
-        0  0 0 0 1 0  1 0  0 0  0 0  0 0  0 0
Tis 0 0 7 0 7 6 1 1 1 0 1 2 0 1 3 0 3 0 2 1 0 0 0 0 1 1 0 0 0 0 0 2 1 0

```

sie  
rel  
lal  
es|  
f\_\_  
Ana  
ero  
vor  
aca  
cea  
e|g  
\_\_F  
ami  
ly\_  
XII  
I\_U  
CG-  
001  
d\_\_  
Bac  
ter  
ial  
p\_\_  
Fir  
mic  
ute  
s|c  
\_\_C  
los  
tri  
dia  
lo\_  
\_Pe  
pto  
str  
ept  
oco  
cca  
les  
-

|     |                     |                       |             |             |                   |                         |     |  |     |  |     |
|-----|---------------------|-----------------------|-------------|-------------|-------------------|-------------------------|-----|--|-----|--|-----|
| Tis | 0                   | 0 0 0 0 0             | 0 0         | 0 0         | 0                 | 0 0                     | 0 0 |  | 0 0 |  | 0 0 |
| sie | .                   | . . . . .             | . .         | . .         | .                 | . .                     |     |  | . . |  | . . |
| rel | 0                   | 0 0 0 1 0             | 1 0         | 0 0         | 0                 | 0 0                     |     |  | 0 0 |  | 0 0 |
| lal | 0 0 7 0 7 6 1 1 1 0 | 1 2 0 1 3 0 3 0 2 1 0 | 0 0 0 0 0 0 | 0 0 0 0 0 0 | 0 1 1 0 0 0 0 0 0 | 0 1 1 0 0 0 0 0 0 2 1 0 |     |  |     |  |     |



```

es|
f__
Ana
ero
vor
aca
cea
e|g
__F
ami
ly_
XII
I_U
CG-
001
|s_
_Fa
mil
y_X
III
_UC
G-
001
_un
cla
ssi
fie
d
d__
Bac
ter
ia|
p__
Fir
mic
ute
s|c
__C
los
tri
dia           0
|o_           .
_Pe           0
pto 0 0 0 0 0 0 0 0 0 0 0 0 0 0 0 0 0 0 1 0 0 0 0 0 0 0 0 0 0 0 0 0 0 0 0 0 0 0 0 0 0 0 0

```

str  
ept  
oco  
cca  
les  
-  
Tis  
sie  
rel  
lal  
es|  
f\_\_  
Ana  
ero  
vor  
aca  
cea  
e|g  
\_\_S  
5-  
A14  
a  
d\_\_  
Bac  
ter  
ia|  
p\_\_  
Fir  
mic  
ute  
s|c  
\_\_C  
los  
tri  
dia  
|o\_  
\_Pe  
pto  
str  
ept  
oco  
cca  
les  
- 0 0 0 0 0 0 0 0 0 0 0 0 0 0 0 0 0 0 0 0 0 1 0 0 0 0 0 0 0 0 0 0 0 0 0 0 0 0 0 0 0 0 0

```

Tis
sie
rel
lal
es|
f__
Ana
ero
vor
aca
cea
e|g
__S
5-
A14
a|s
__S
5-
A14
a_u
ncl
ass
ifi
ed
d__
Bac
ter
ia|
p__
Fir
mic
ute
s|c
__C
los
tri
dia
|o_
_Pe
pto
str          0          00  00  0  00  00  00
ept          .          . .  .  . .  . .
oco          0          00  00  0  00  00  00
cca 0 0 0 0 0 0 0 0 0 0 0 0 1 0 0 0 0 1 1 0 1 0 0 0 0 0 1 1 0 1 1 0 1 1

```

```

les
-
Tis
sie
rel
lal
es|
f__
Fam
ily
_XI
d__
Bac
ter
ia|
p__
Fir
mic
ute
s|c
__C
los
tri
dia
|o_
_Pe
pto
str
ept
oco
cca
les
-
Tis
sie
rel
lal
es|
f__
Fam
ily          0          0          0          0          00          00
_XI          .          .          .          .          . .          . .
|g_          0          0          0          0          00          00
_An 0 0 0 0 0 0 0 0 0 0 0 0 0 1 0 0 0 0 1 0 0 0 0 0 0 0 0 0 0 0 0 1 0 0 0 1 1 0 0 1

```

```

aer
oco
ccu
s
d__
Bac
ter
ial
p__
Fir
mic
ute
s|c
__C
los
tri
dia
|o_
_Pe
pto
str
ept
oco
cca
les
-
Tis
sie
rel
lal
es|
f__
Fam
ily
_XI
|g_
_An
aer
oco
ccu
s|s          0          0          0          0          0 0          0 0
__A          .          .          .          .          . .          . .
nae          0          0          0          0          0 0          0 0
roc 0 0 0 0 0 0 0 0 0 0 0 0 0 1 0 0 0 0 1 0 0 0 0 0 0 0 0 0 0 0 0 1 0 0 1 1 0 0 1

```





|     |                                                             |   |                                     |
|-----|-------------------------------------------------------------|---|-------------------------------------|
| r_u |                                                             |   |                                     |
| ncl |                                                             |   |                                     |
| ass |                                                             |   |                                     |
| ifi |                                                             |   |                                     |
| ed  |                                                             |   |                                     |
| d__ |                                                             |   |                                     |
| Bac |                                                             |   |                                     |
| ter |                                                             |   |                                     |
| ia  |                                                             |   |                                     |
| p__ |                                                             |   |                                     |
| Fir |                                                             |   |                                     |
| mic |                                                             |   |                                     |
| ute |                                                             |   |                                     |
| s c |                                                             |   |                                     |
| __C |                                                             |   |                                     |
| los |                                                             |   |                                     |
| tri |                                                             |   |                                     |
| dia |                                                             |   |                                     |
| lo_ |                                                             |   |                                     |
| _Pe |                                                             |   |                                     |
| pto |                                                             |   |                                     |
| str |                                                             |   |                                     |
| ept |                                                             |   |                                     |
| oco |                                                             |   |                                     |
| cca |                                                             |   |                                     |
| les |                                                             |   |                                     |
| -   |                                                             |   |                                     |
| Tis |                                                             |   |                                     |
| sie |                                                             |   |                                     |
| rel |                                                             |   |                                     |
| lal |                                                             |   |                                     |
| es  |                                                             |   |                                     |
| f__ |                                                             |   |                                     |
| Fam |                                                             |   |                                     |
| ily |                                                             |   |                                     |
| _XI |                                                             |   |                                     |
| lg_ |                                                             |   |                                     |
| _Ez |                                                             | 0 | 0                                   |
| aki |                                                             | . | .                                   |
| ell |                                                             | 0 | 0                                   |
| a   | 0 0 0 0 0 0 0 0 0 0 0 0 0 0 0 0 0 0 0 0 0 0 0 0 0 0 0 0 0 0 | 1 | 0 0 0 0 0 0 0 0 0 0 0 0 0 0 0 0 0 0 |
| d__ |                                                             | 0 | 0                                   |
| Bac |                                                             | . | .                                   |
| ter | 0 0 0 0 0 0 0 0 0 0 0 0 0 0 0 0 0 0 0 0 0 0 0 0 0 0 0 0     | 0 | 0 0 0 0 0 0 0 0 0 0 0 0 0 0 0 0     |











s|c  
\_\_C  
los  
tri  
dia  
lo\_  
\_Pe  
pto  
str  
ept  
oco  
cca  
les  
-  
Tis  
sie  
rel  
lal  
es|  
f\_\_  
Fam  
ily  
\_XI  
lg\_  
\_Te  
pid  
imi  
cro  
biu  
m|s  
\_\_T  
epi  
dim  
icr  
obi  
um\_  
unc  
las  
sif  
ied  
d\_\_ 0 0 0 0 0 0 0 0 0 0 0 0 0 0 0 0 0 0 0 0 0 0 0  
Bac . . . . .  
ter 0 0 0 0 0 0 0 0 0 0 0 0 0 0 0 0 4 0 0 1 2 0 0  
ia| 0 0 1 0 2 2 0 0 0 1 0 1 1 2 0 0 1 1 1 7 3 7 8 3 4 4 5 6 3 3 1 7 5 4

p\_\_  
 Fir  
 mic  
 ute  
 s|c  
 \_\_C  
 los  
 tri  
 dia  
 |o\_  
 \_Pe  
 pto  
 str  
 ept  
 oco  
 cca  
 les  
 -  
 Tis  
 sie  
 rel  
 lal  
 es|  
 f\_\_  
 Pep  
 tos  
 tre  
 pto  
 coc  
 cac  
 eae  
 d\_\_  
 Bac  
 ter  
 ia|  
 p\_\_  
 Fir  
 mic  
 ute  
 s|c  
 \_\_C     0   0 0 0     0     0 0   0 0 0 0 0 0 0 0 0 0 0 0 0 0 0 0 0 0 0 0  
 los     .   . . .     .     . .   . . . . . . . . . . . . . . . . . . . . . . . . . . . .  
 tri     0   0 0 0     0     0 0   0 0 0 0 0 0 0 0 0 0 0 0 0 0 0 0 0 4 0 0 1 2 0 0  
 dia   0 0 1 0 2 2 0 0 0 0 1 0 0 1 2 0 0 1 1 1 7 3 7 7 3 4 4 3 5 2 2 1 4 3 4

```

lo_
_Pe
pto
str
ept
oco
cca
les
-
Tis
sie
rel
lal
es|
f__
Pep
tos
tre
pto
coc
cac
eae
lg_
_Ro
mbo
uts
ia
d__
Bac
ter
ia|
p__
Fir
mic
ute
s|c
__C
los
tri
dia
lo_      0  0 0 0    0    0 0  0 0 0 0 0 0 0 0 0 0 0 0 0 0 0 0 0
_Pe      .  . . .    .    . .  . . . . . . . . . . . . . . .
pto      0  0 0 0    0    0 0  0 0 0 0 0 0 0 0 0 0 0 0 4 0 0 1 2 0 0
str    0 0 1 0 2 2 0 0 0 1 0 0 1 2 0 0 1 1 1 7 3 7 7 3 4 4 3 5 2 2 1 4 3 4

```

```

ept
oco
cca
les
-
Tis
sie
rel
lal
es|
f__
Pep
tos
tre
pto
coc
cac
eae
lg_
_Ro
mbo
uts
ia|
s__
Rom
bou
tsi
a_u
ncl
ass
ifi
ed
d__
Bac
ter
ia|
p__
Fir
mic
ute
s|c          0          0 0    0 0 0 0 0 0 0
__C          .          . .    . . . . . . .
los         0          0 0    0 0 0 0 0 0 0
tri 0 0 0 0 0 0 0 0 0 0 0 0 1 0 0 0 0 0 0 0 0 0 0 0 1 1 0 0 2 1 1 1 1 2 2 0

```



```

dia
|o_
_Pe
pto
str
ept
oco
cca
les
-
Tis
sie
rel
lal
es|
f__
Pep
tos
tre
pto
coc
cac
eae
|g_
_Te
rri
spo
rob
act
er
d__
Bac
ter
ia|
p__
Fir
mic
ute
s|c
__C
los          0          0 0      0 0 0 0 0 0 0
tri          .          . .      . . . . . . .
dia          0          0 0      0 0 0 0 0 0 0
|o_ 0 0 0 0 0 0 0 0 0 0 0 0 1 0 0 0 0 0 0 0 0 0 0 0 1 1 0 0 2 1 1 1 1 2 2 0

```



Fir  
mic  
ute  
s|c  
\_\_C  
los  
tri  
dia  
|o\_  
\_Pe  
pto  
str  
ept  
oco  
cca  
les  
-  
Tis  
sie  
rel  
lal  
es|  
f\_\_  
Pep  
tos  
tre  
pto  
coc  
cal  
es-  
Tis  
sie  
rel  
lal  
es\_  
unc  
las  
sif  
ied  
d\_\_  
Bac 0  
ter .  
ial 0  
p\_\_ 0 0 0 0 0 0 0 0 0 1 0 0 0 0 0 0 0 0 0 0 0 0 0 0 0 0 0 0 0 0 0 0 0 0 0 0 0 0 0 0

Fir  
mic  
ute  
s|c  
\_\_C  
los  
tri  
dia  
|o\_  
\_Pe  
pto  
str  
ept  
oco  
cca  
les  
-  
Tis  
sie  
rel  
lal  
es|  
f\_\_  
Pep  
tos  
tre  
pto  
coc  
cal  
es-  
Tis  
sie  
rel  
lal  
es\_  
unc  
las  
sif  
ied  
|g\_  
\_Pe  
pto  
str  
ept



pto  
coc  
cal  
es-  
Tis  
sie  
rel  
lal  
es\_  
unc  
las  
sif  
ied  
lg\_  
\_Pe  
pto  
str  
ept  
oco  
cca  
les  
-  
Tis  
sie  
rel  
lal  
es\_  
unc  
las  
sif  
ied  
|s\_  
\_Pe  
pto  
str  
ept  
oco  
cca  
les  
-  
Tis  
sie  
rel  
lal













tri  
 dia  
 |o\_  
 \_Th  
 erm  
 oan  
 aer  
 oba  
 cte  
 ral  
 es|  
 f\_\_  
 The  
 rmo  
 ana  
 ero  
 bac  
 ter  
 ace  
 ae|  
 g\_\_  
 Moo  
 rel  
 la|  
 s\_\_  
 Moo  
 rel  
 la\_  
 hum  
 ife  
 rre  
 a  
 d\_\_  
 Bac  
 ter  
 ia|  
 p\_\_  
 Fir  
 mic  
 ute

|     |                                                                     |         |   |   |         |   |     |         |
|-----|---------------------------------------------------------------------|---------|---|---|---------|---|-----|---------|
| s c | 0 0 0                                                               | 0 0 0 0 | 0 | 0 | 0 0 0 0 | 0 | 0 0 | 0 0 0 0 |
| __E | . . .                                                               | . . . . | . | . | . . . . | . | . . | . . . . |
| rys | 0 3 0                                                               | 0 0 0 2 | 1 | 0 | 0 0 0 1 | 0 | 0 0 | 0 0 0 0 |
| ipe | 3 3 6 0 0 1 3 1 3 0 0 2 0 0 0 0 0 0 9 1 4 1 0 3 0 4 7 0 0 0 1 1 2 1 |         |   |   |         |   |     |         |

```

lot
ric
hia
d__
Bac
ter
ial
p__
Fir
mic
ute
s|c
__E
rys
ipe
lot
ric
hia
lo_
_Er
ysi
pel
otr 0 0 0      0 0 0 0 0      0      0 0 0 0 0      0 0 0      0 0 0 0
ich . . .      . . . . .      .      . . . . .      . . .      . . . . .
ale 0 3 0      0 0 0 2      1      0 0 0 0 1      0 0 0      0 0 0 0
s   3 3 6 0 0 1 3 1 3 0 0 2 0 0 0 0 0 0 9 1 4 1 0 3 0 4 7 0 0 0 0 1 1 2 1
d__
Bac
ter
ial
p__
Fir
mic
ute
s|c
__E
rys
ipe
lot
ric
hia 0 0 0      0 0 0 0 0      0      0 0 0 0 0      0 0 0      0 0 0
lo_ . . .      . . . . .      .      . . . . .      . . .      . . . . .
_Er 0 3 0      0 0 0 2      1      0 0 0 0 1      0 0 0      0 0 0
ysi 3 3 6 0 0 1 3 1 2 0 0 2 0 0 0 0 0 0 9 1 4 1 0 3 0 4 7 0 0 0 0 1 2 1

```

pel  
 otr  
 ich  
 ale  
 s|f  
 \_\_E  
 rys  
 ipe  
 lot  
 ric  
 hac  
 eae  
 d\_\_  
 Bac  
 ter  
 ia|  
 p\_\_  
 Fir  
 mic  
 ute  
 s|c  
 \_\_E  
 rys  
 ipe  
 lot  
 ric  
 hia  
 |o\_  
 \_Er  
 ysi  
 pel  
 otr  
 ich  
 ale  
 s|f  
 \_\_E  
 rys  
 ipe  
 lot  
 ric  
 hac  
 eae  
 |g\_  
 \_Ab

|       |             |                         |                 |                 |     |       |
|-------|-------------|-------------------------|-----------------|-----------------|-----|-------|
| 0     | 0 0         | 0                       | 0               | 0 0 0 0         | 0 0 | 0 0 0 |
| .     | . .         | .                       | .               | . . . .         | . . | . . . |
| 0     | 0 0         | 1                       | 1               | 0 0 0 1         | 0 0 | 0 0 0 |
| 0 0 6 | 0 0 0 1 0 9 | 0 0 1 0 0 0 0 0 0 0 0 9 | 1 4 1 0 0 0 4 7 | 0 0 0 0 0 1 2 1 |     |       |







```

ipe
lot
ric
hia
lo_
_Er
ysi
pel
otr
ich
ale
s|f
__E
rys
ipe
lot
ric
hac
eae
lg_
_Al
lob
acu
lum
|s_
_un
cul
tur
ed_
All
oba
cul
um_
sp.
d__
Bac
ter
ia|
p__
Fir
mic    0      0 0 0 0    0      0
ute    .      . . . .    .      .
s|c    0      0 0 0 0    0      0
__E    0 3 0 0 0 1 1 1 3 0 0 1 0 0 0 0 0 0 0 0 0 0 0 0 0 3 0 0 0 0 0 0 0 0 0 0 0

```

```

rys
ipe
lot
ric
hia
lo_
_Er
ysi
pel
otr
ich
ale
s|f
__E
rys
ipe
lot
ric
hac
eae
lg_
_Ca
ndi
dat
us_
Sto
que
fic
hus
d__
Bac
ter
ia|
p__
Fir
mic
ute
s|c
__E
rys
ipe    0      0 0 0 0    0      0
lot    .      . . . .    .      .
ric    0      0 0 0 0    0      0
hia    0 3 0 0 0 1 1 1 3 0 0 1 0 0 0 0 0 0 0 0 0 0 0 0 0 0 3 0 0 0 0 0 0 0 0 0 0 0

```



mic  
ute  
s|c  
\_\_E  
rys  
ipe  
lot  
ric  
hia  
lo\_  
\_Er  
ysi  
pel  
otr  
ich  
ale  
s|f  
\_\_E  
rys  
ipe  
lot  
ric  
hac  
eae  
lg\_  
\_Er  
ysi  
pel  
otr  
ich  
ace  
ae\_  
unc  
las  
sif  
ied  
d\_  
Bac  
ter  
ia|  
p\_\_ 0  
Fir .  
mic 1  
ute 0 1 0 0 0 0 0 0 0 0 0 0 0 0 0 0 0 0 0 0 0 0 0 0 0 0 0 0 0 0 0 0

s|c  
\_\_E  
rys  
ipe  
lot  
ric  
hia  
|o\_  
\_Er  
ysi  
pel  
otr  
ich  
ale  
s|f  
\_\_E  
rys  
ipe  
lot  
ric  
hac  
eae  
|g\_  
\_Er  
ysi  
pel  
otr  
ich  
ace  
ae\_  
unc  
las  
sif  
ied  
|s\_  
\_Er  
ysi  
pel  
otr  
ich  
ace  
ae\_  
unc  
las





mic  
ute  
s|c  
\_\_E  
rys  
ipe  
lot  
ric  
hia  
|o\_  
\_Er  
ysi  
pel  
otr  
ich  
ale  
s|f  
\_\_E  
rys  
ipe  
lot  
ric  
hal  
es\_  
unc  
las  
sif  
ied  
|g\_  
\_Er  
ysi  
pel  
otr  
ich  
ale  
s\_u  
ncl  
ass  
ifi  
ed|  
s\_\_  
Ery  
sip  
elo



tri  
cha  
les

\_un  
cla  
ssi  
fie  
d

d\_\_  
Bac  
ter  
ial  
p\_\_  
Fir  
mic  
ute  
s|c  
\_\_F  
irm  
icu  
tes

\_un  
cla 0 0 0 0 0 2 0 1 1 0 2 1 0 0 0 0 0 0 0 0 0 0 1 0 3 0 0 0 0 0 4 1 2 0  
ssi . . . . .  
fie 0 0 8 3 1 2 7 1 7 6 9 1 2 0 1 9 2 1 3 1 2 1 3 1 6 5 2 9 5 6 2 0 3 0  
d 4 8 9 8 2 4 6 2 6 5 7 1 1 9 3 8 5 9 3 5 7 1 3 0 1 5 1 7 7 3 6 8 3 6

d\_\_  
Bac  
ter  
ial

p\_\_  
Fir  
mic  
ute  
s|c  
\_\_F  
irm  
icu  
tes

\_un  
cla 0 0 0 0 0 2 0 1 1 0 2 1 0 0 0 0 0 0 0 0 0 0 1 0 3 0 0 0 0 0 4 1 2 0  
ssi . . . . .  
fie 0 0 8 3 1 2 7 1 7 6 9 1 2 0 1 9 2 1 3 1 2 1 3 1 6 5 2 9 5 6 2 0 3 0  
d|o 4 8 9 8 2 4 6 2 6 5 7 1 1 9 3 8 5 9 3 5 7 1 3 0 1 5 1 7 7 3 6 8 3 6

\_\_F

irm

icu

tes

\_un

cla

ssi

fie

d

d\_\_

Bac

ter

ia|

p\_\_

Fir

mic

ute

s|c

\_\_F

irm

icu

tes

\_un

cla

ssi

fie

d|o

\_\_F

irm

icu

tes

\_un

cla

ssi

fie

d|f

\_\_F

irm

icu

tes

\_un 0 0 0 0 0 2 0 1 1 0 2 1 0 0 0 0 0 0 0 0 0 0 1 0 3 0 0 0 0 0 4 1 2 0

cla . . . . .

ssi 0 0 8 3 1 2 7 1 7 6 9 1 2 0 1 9 2 1 3 1 2 1 3 1 6 5 2 9 5 6 2 0 3 0

fie 4 8 9 8 2 4 6 2 6 5 7 1 1 9 3 8 5 9 3 5 7 1 3 0 1 5 1 7 7 3 6 8 3 6

```

d
d__
Bac
ter
ia|
p__
Fir
mic
ute
s|c
__F
irm
icu
tes
_un
cla
ssi
fie
d|o
__F
irm
icu
tes
_un
cla
ssi
fie
d|f
__F
irm
icu
tes
_un
cla
ssi
fie
d|g
__F
irm
icu
tes 0 0 0 0 0 2 0 1 1 0 2 1 0 0 0 0 0 0 0 0 0 0 1 0 3 0 0 0 0 0 4 1 2 0
_un . . . . .
cla 0 0 8 3 1 2 7 1 7 6 9 1 2 0 1 9 2 1 3 1 2 1 3 1 6 5 2 9 5 6 2 0 3 0
ssi 4 8 9 8 2 4 6 2 6 5 7 1 1 9 3 8 5 9 3 5 7 1 3 0 1 5 1 7 7 3 6 8 3 6

```

```

fie
d
d__
Bac
ter
ia|
p__
Fir
mic
ute
s|c
__F
irm
icu
tes
_un
cla
ssi
fie
d|o
__F
irm
icu
tes
_un
cla
ssi
fie
d|f
__F
irm
icu
tes
_un
cla
ssi
fie
d|g
__F
irm
icu 0 0 0 0 0 2 0 1 1 0 2 1 0 0 0 0 0 0 0 0 0 0 1 0 3 0 0 0 0 0 4 1 2 0
tes . . . . .
_un 0 0 8 3 1 2 7 1 7 6 9 1 2 0 1 9 2 1 3 1 2 1 3 1 6 5 2 9 5 6 2 0 3 0
cla 4 8 9 8 2 4 6 2 6 5 7 1 1 9 3 8 5 9 3 5 7 1 3 0 1 5 1 7 7 3 6 8 3 6

```







```

hor
dac
eae
lg_
_Li
mno
cho
rda
cea
e_u
ncl
ass
ifi
ed|
s__
Lim
noc
hor
dac
eae
_un
cla
ssi
fie
d
d__
Bac
ter
ia|
p__
Fir
mic
ute
s|c
__N
ega 0      0 0 0      0  0 0 0 0 0 0 0  0 0 0 0 0 0 0 0 1 0 1 0 0 0
tiv .      . . .      .  . . . . . . . . . . . . . . . . . . .
icu 0      0 0 0      0  0 0 0 0 0 0 0  0 0 1 0 0 1 4 1 1 5 5 3 9 0 2
tes 1 0 0 0 2 1 1 0 0 1 0 2 6 3 5 4 2 5 0 8 6 3 4 7 6 4 5 2 9 7 6 9 4 1
d__
Bac 0      0 0      0  0 0 0 0  0 0  0 0 0  0  0 0 0 0 0 0 0 0 0 0 0
ter .      . .      .  . . . . . . . . . . . . . . . . . . .
ia| 0      0 0      0  0 0 0 0  0 0  0 0 0  0  0 0 0 0 0 0 0 0 0 0 0
p__ 1 0 0 0 1 1 0 0 0 1 0 1 1 1 1 0 1 1 0 2 1 2 0 1 0 1 1 3 1 1 2 1 2 1

```



```

Fir
mic
ute
s|c
__N
ega
tiv
icu
tes
|o_
_Ac
ida
min
oco
cca
les
d__
Bac
ter
ia|
p__
Fir
mic
ute
s|c
__N
ega
tiv
icu
tes
|o_
_Ac
ida
min
oco
cca
les
|f_
_Ac
ida
min 0      0 0      0  0 0 0 0  0 0  0 0 0  0  0 0 0 0 0 0 0 0
oco .      . .      .  . . . .  . .  . . . .  . . . . .
cca 0      0 0      0  0 0 0 0  0 0  0 0 0  0  0 0 0 0 0 0 0 0
cea 1 0 0 0 1 1 0 0 0 1 0 1 1 1 1 0 1 1 0 2 1 2 0 1 0 1 1 3 1 1 2 1 2 1

```

e  
d\_\_  
Bac  
ter  
ial  
p\_\_  
Fir  
mic  
ute  
s|c  
\_\_N  
ega  
tiv  
icu  
tes  
|o\_  
\_Ac  
ida  
min  
oco  
cca  
les  
|f\_  
\_Ac  
ida  
min  
oco  
cca  
cea  
e|g  
\_\_A  
cid  
ami  
noc  
occ  
us 0 0 0 0 0 0 0 0 0 0 0 0 0 0 0 0 0 0 0 0 0 0 0 0 0 0 0 0 0 0 0 0 0 0 0 0  
d\_\_  
Bac  
ter  
ial  
p\_\_  
Fir  
mic  
ute 0 0 0 0 0 0 0 0 0 0 0 0 0 0 0 0 0 0 0 0 0 0 0 0 0 0 0 0 0 0 0 0 0 0 0 0  
0  
.  
0  
0  
0  
0  
.0

```

s|c
__N
ega
tiv
icu
tes
|o_
_Ac
ida
min
oco
cca
les
|f_
_Ac
ida
min
oco
cca
cea
e|g
_A
cid
ami
noc
occ
us|
s__
Aci
dam
ino
coc
cus
_un
cla
ssi
fie
d
d__
Bac
ter 0      0 0      0 0 0 0 0 0 0 0 0 0 0 0 0 0 0 0 0 0
ia| .      . .      . . . . . . . . . . . . . . . . . . . .
p__ 0      0 0      0 0 0 0 0 0 0 0 0 0 0 0 0 0 0 0 0 0
Fir 1 0 0 0 1 1 0 0 0 1 0 1 1 1 1 0 1 1 0 2 1 2 0 1 0 1 1 3 1 1 1 1 2 1

```

mic  
ute  
s|c  
\_\_N  
ega  
tiv  
icu  
tes  
|o\_  
\_Ac  
ida  
min  
oco  
cca  
les  
|f\_  
\_Ac  
ida  
min  
oco  
cca  
cea  
e|g  
\_\_P  
has  
col  
arc  
tob  
act  
eri  
um  
d\_\_  
Bac  
ter  
ia|  
p\_\_  
Fir  
mic  
ute  
s|c  
\_\_N  
ega  
tiv  
icu

0 0 0 0 0 0 0 0 0 0 0 1 0 0 0 0 0 0 0 0 0 0 0 1 0 1 0 0 0 0 0 1 1 0 0 0 0 1 0  
0 0 0 0  
. . . .  
0 0 0 0 0





ia| 1            1 1                    1 1 1 1    1 1    1 1 1    1    1    2 1 1 1 1 2 1

p\_\_

Fir

mic

ute

s|c

\_\_N

ega

tiv

icu

tes

lo\_

\_Ac

ida

min

oco

cca

les

|f\_

\_Ac

ida

min

oco

cca

cea

e|g

\_\_P

has

col

arc

tob

act

eri

um|

s\_\_

unc

ult

ure

d\_P

has

col

arc

tob

act

eri  
um\_  
sp.  
d\_\_  
Bac  
ter  
ial  
p\_\_  
Fir  
mic  
ute  
s|c  
\_\_N  
ega  
tiv  
icu  
tes  
|o\_  
\_Ac  
ida  
min  
oco  
cca  
les  
|f\_  
\_Ac  
ida  
min  
oco  
cca  
cea  
e|g  
\_\_S  
ucc  
ini  
cla  
sti  
cum 0 0 0 0 0 0 0 0 0 0 0 0 0 0 0 0 0 0 0 0 0 0 0 0 0 0 0 0 0 0  
d\_\_  
Bac  
ter  
ial  
p\_\_  
Fir 0 0 0 0 0 0 0 0 0 0 0 0 0 0 0 0 0 0 0 0 0 0 0 0 0 0 0 0 0 0



mic  
ute  
s|c  
\_\_N  
ega  
tiv  
icu  
tes  
|o\_  
\_Ac  
ida  
min  
oco  
cca  
les  
|f\_  
\_Ac  
ida  
min  
oco  
cca  
cea  
e|g  
\_\_S  
ucc  
ini  
cla  
sti  
cum  
|s\_  
\_Su  
cci  
nic  
las  
tic  
um\_  
unc  
las  
sif  
ied

|     |   |   |   |   |   |   |   |   |   |   |   |   |   |   |   |   |   |   |   |   |   |   |   |   |   |   |   |   |   |   |   |   |   |   |   |
|-----|---|---|---|---|---|---|---|---|---|---|---|---|---|---|---|---|---|---|---|---|---|---|---|---|---|---|---|---|---|---|---|---|---|---|---|
| d__ | 0 | 0 | 0 | 0 | 0 | 0 | 0 | 0 | 0 | 0 | 0 | 0 | 0 | 0 | 0 | 0 | 0 | 1 | 0 | 1 | 0 | 0 | 0 |   |   |   |   |   |   |   |   |   |   |   |   |
| Bac | . | . | . | . | . | . | . | . | . | . | . | . | . | . | . | . | . | . | . | . | . | . | . | . |   |   |   |   |   |   |   |   |   |   |   |
| ter | 0 | 0 | 0 | 0 | 0 | 0 | 0 | 0 | 0 | 0 | 0 | 0 | 0 | 1 | 0 | 0 | 1 | 4 | 1 | 0 | 5 | 5 | 3 | 9 | 0 | 2 |   |   |   |   |   |   |   |   |   |
| ia  | 0 | 0 | 0 | 0 | 0 | 0 | 0 | 1 | 0 | 0 | 0 | 0 | 0 | 5 | 2 | 4 | 4 | 1 | 4 | 0 | 7 | 5 | 2 | 4 | 7 | 6 | 3 | 5 | 9 | 9 | 6 | 4 | 8 | 2 | 0 |

p\_\_  
 Fir  
 mic  
 ute  
 s|c  
 \_\_N  
 ega  
 tiv  
 icu  
 tes  
 lo\_  
 \_Ve  
 ill  
 one  
 lla  
 les  
 -  
 Sel  
 eno  
 mon  
 ada  
 les  
 d\_\_  
 Bac  
 ter  
 ia|  
 p\_\_  
 Fir  
 mic  
 ute  
 s|c  
 \_\_N  
 ega  
 tiv  
 icu  
 tes  
 lo\_  
 \_Ve  
 ill  
 one  
 lla  
 les  
 -  
 Sel

```

                                0 0 0 0 0 0    0 0 0 0 0 0 0 0 0 0 1 0 1 0    0
                                . . . . .    . . . . . . . . . . . . . . . . .
                                0 0 0 0 0 0    0 0 0 0 0 1 4 1 0 5 5 3 9    2
    Sel 0 0 0 0 0 0 0 0 0 0 0 0 0 2 2 1 2 1 2 0 5 1 9 0 3 6 2 1 9 6 6 4 6 0 0
  
```







```

amo
nas
d__
Bac
ter
ia|
p__
Fir
mic
ute
s|c
__N
ega
tiv
icu
tes
|o_
_Ve
ill
one
lla
les
-
Sel
eno
mon
ada
les
|f_
_Se
len
omo
nad
ace
ae|
g__
Meg
amo
nas
|s_
_Me          0 0 0 0 0 0
gam          . . . . .
ona          0 0 0 0 0 0
s_u 0 0 0 0 0 0 0 0 0 0 0 0 2 2 1 2 1 2 0 0 0 0 0 0 0 0 0 0 0 0 0 0 0 0 0 0 0 0 0 0 0 0 0 0 0 0

```















```

ill
one
lla
les
-
Sel
eno
mon
ada
les
|f_
_Sp
oro
mus
ace
ae|
g__
Spo
rom
usa
|s_
_Sp
oro
mus
a_u
ncl
ass
ifi
ed
d__
Bac
ter
ia|
p__
Fir
mic
ute
s|c
__N
ega
tiv          0  0          0 0  0 0  0  0 0 0 0 0 0 0 0 0 0 0 0 0
icu          .  .          . .  . .  .  . . . . . . . . . . . . . . .
tes          0  0          0 0  0 0  0  0 0 0 0 0 0 0 0 0 0 0 0 0 0
|o_ 0 0 0 0 0 0 1 0 0 0 0 0 3 0 2 2 0 2 0 2 5 3 4 4 1 1 4 0 3 1 1 2 2 1

```

\_Ve  
ill  
one  
lla  
les  
-

Sel  
eno  
mon  
ada  
les

|f\_  
\_Ve  
ill  
one  
lla  
cea  
e

d\_  
Bac  
ter  
ia|

p\_  
Fir  
mic  
ute  
s|c

\_\_N  
ega  
tiv  
icu  
tes

lo\_  
\_Ve  
ill  
one  
lla  
les  
-

Sel  
eno  
mon  
ada  
les

|               |    |   |         |   |       |   |   |   |   |   |   |   |   |   |   |   |   |   |   |   |   |   |
|---------------|----|---|---------|---|-------|---|---|---|---|---|---|---|---|---|---|---|---|---|---|---|---|---|
| 0             | 00 | 0 | 0000000 | 0 | 0000  |   |   |   |   |   |   |   |   |   |   |   |   |   |   |   |   |   |
| .             | .  | . | .....   | . | ..... |   |   |   |   |   |   |   |   |   |   |   |   |   |   |   |   |   |
| 0             | 00 | 0 | 0000000 | 0 | 0000  |   |   |   |   |   |   |   |   |   |   |   |   |   |   |   |   |   |
| 0000000000000 | 3  | 0 | 2       | 2 | 0     | 2 | 0 | 2 | 3 | 2 | 2 | 2 | 1 | 0 | 2 | 0 | 1 | 1 | 1 | 1 | 0 | 0 |



















bio  
 bac  
 ter  
 ace  
 ae|  
 g\_\_  
 Sym  
 bio  
 bac  
 ter  
 ium  
 |s\_  
 \_Sy  
 mbi  
 oba  
 cte  
 riu  
 m\_u  
 ncl  
 ass  
 ifi  
 ed  
 d\_\_  
 Bac  
 ter  
 ia|  
 p\_\_  
 Fus  
 oba 0 0 0 0 0   0 0 0 0   0            0 0                    0  
 cte . . . . .   . . . . .   .            . .                    .  
 rio 0 0 0 0 0   0 0 0 0   0            0 0                    0  
 ta  3 3 1 2 1 0 1 1 1 1 0 1 0 0 0 0 0 1 1 0 0 0 0 0 0 0 0 0 0 0 0 0 0 1 0  
 d\_\_  
 Bac  
 ter  
 ia|  
 p\_\_  
 Fus  
 oba  
 cte  
 rio 0 0 0 0 0   0 0 0 0   0            0 0                    0  
 tal . . . . .   . . . . .   .            . .                    .  
 c\_\_ 0 0 0 0 0   0 0 0 0   0            0 0                    0  
 Fus 3 3 1 2 1 0 1 1 1 1 0 1 0 0 0 0 0 1 1 0 0 0 0 0 0 0 0 0 0 0 0 0 0 1 0





bac  
ter  
ial  
es|  
f\_\_  
Fus  
oba  
cte  
ria  
cea  
e

d\_\_  
Bac  
ter  
ial|  
p\_\_  
Fus  
oba  
cte  
rio  
ta|

c\_\_  
Fus  
oba  
cte  
rii  
a|o  
\_\_F

uso  
bac  
ter  
ial  
es|  
f\_\_

Fus  
oba  
cte  
ria  
cea  
e|g  
\_\_C

eto  
bac  
ter

0  
.  
0  
1 0 0 0 0 0 0 0 0 0 0 0 0 0 0 0 0 0 0 0 0 0 0 0 0 0 0 0 0

























oup  
\_un  
cla  
ssi  
fie  
d|f  
\_\_s  
013  
4\_t  
err  
est  
ria  
l\_g  
rou  
p\_u  
ncl  
ass  
ifi  
ed|  
g\_\_  
S01  
34\_  
ter  
res  
tri  
al\_  
gro  
up\_  
unc  
las  
sif  
ied  
|s\_  
\_S0  
134  
\_te  
rre  
str  
ial  
\_gr  
oup  
\_un  
cla  
ssi



nti  
a|o  
\_\_H  
ydr  
oge  
ned  
ent  
ial  
es  
d\_\_  
Bac  
ter  
ial|  
p\_\_  
Hyd  
rog  
ene  
den  
tes  
|c\_  
\_Hy  
dro  
gen  
ede  
nti  
a|o  
\_\_H  
ydr  
oge  
ned  
ent  
ial  
es|  
f\_\_  
Hyd  
rog  
ene  
den  
sac  
eae  
d\_\_  
Bac  
ter  
ial|

```
0  
. 0  
0 0 0 0 0 0 0 0 0 0 0 0 0 0 0 0 0 0 0 0 0 0 0 0 0 0 0 0 0  
0  
0  
0 0 0 0 0 0 0 0 0 0 0 0 0 0 0 0 0 0 0 0 0 0 0 0 0 0 0 0 0 0
```





Hyd  
rog  
ene  
den  
tes  
|c\_  
\_Hy  
dro  
gen  
ede  
nti  
alo  
\_\_H  
ydr  
oge  
ned  
ent  
ial  
es|  
f\_\_  
Hyd  
rog  
ene  
den  
sac  
eae  
|g\_  
\_Hy  
dro  
gen  
ede  
nsa  
cea  
e\_u  
ncl  
ass  
ifi  
ed|  
s\_\_  
Hyd  
rog  
ene  
den  
sac









\_\_B

Iri

i41

d\_\_

Bac

ter

ial

p\_\_

Myx

oco

cco

tal

c\_\_

Pol

yan

gia

lo\_

\_Po

lya

ngi

ale

s|f

\_\_B

Iri

i41

lg\_

\_BI

rii

41\_

unc

las

sif

ied

0 0 0 0 0 0 0 0 0 0 0 0 0 0 0 0 0 0 0 0 0 0 0 0 0 0 0 0 0 0 0 0 0 0 0 0 0 0 0 0 0 0 0 0 0 0 0 0

d\_\_

Bac

ter

ial

p\_\_

Myx

oco

cco

tal

c\_\_

Pol

0 0 0 0 0 0 0 0 0 0 0 0 0 0 0 0 0 0 0 0 0 0 0 0 0 0 0 0 0 0 0 0 0 0 0 0 0 0 0 0 0 0 0 0 0 0 0 0

0

0

.

.

0

0

0

0

.

.

0

0







ta|  
c\_\_  
Pol  
yan  
gia  
lo\_  
\_Po  
lya  
ngi  
ale  
s|f  
\_\_P  
oly  
ang  
iac  
eae  
lg\_  
\_So  
ran  
giu  
m|s  
\_\_S  
ora  
ngi  
um\_  
unc  
las  
sif  
ied  
d\_\_  
Bac  
ter  
ia|  
p\_\_  
Nit  
ros  
pir  
ota 0 0 0 0 0 0 0 0 0 0 0 0 0 0 0 0 0 0 0 0 0 0 0 0 0 0 0 0  
d\_\_  
Bac  
ter  
ia|  
p\_\_  
Nit 0 0 0 0 0 0 0 0 0 0 0 0 0 0 0 0 0 0 0 0 0 0 0 0 0 0 0 0





29-

l\_u

ncl

ass

ifi

ed

d\_\_

Bac

ter

ia|

p\_\_

Nit

ros

pir

ota

|c\_

\_4-

29-

l|o

\_\_4

-

29-

l\_u

ncl

ass

ifi

ed|

f\_\_

4-

29-

l\_u

ncl

ass

ifi

ed|

g\_\_

4-

29-

l\_u

ncl

ass

ifi

ed|

s\_\_

0 0 0 0 0 0 0 0 0 0 0 0 0 0 0 0 0 0 0 0 0 0 0 0 0 0 0 0 0 0 0

4-  
29-  
l\_u  
ncl  
ass  
ifi  
ed  
d\_\_  
Bac  
ter  
ia|  
p\_\_  
Nit  
ros  
pir  
ota  
|c\_  
\_Ni  
tro  
spi  
ria 0 0 0 0 0 0 0 0 0 0 0 0 0 0 0 0 0 0 0 0 0 0 0 0 0 0 0 0 0 0  
d\_\_  
Bac  
ter  
ia|  
p\_\_  
Nit  
ros  
pir  
ota  
|c\_  
\_Ni  
tro  
spi  
ria  
|o\_  
\_Ni  
tro  
spi  
ral  
es 0 0 0 0 0 0 0 0 0 0 0 0 0 0 0 0 0 0 0 0 0 0 0 0 0 0 0 0 0 0  
d\_\_  
Bac  
ter 0 0 0 0 0 0 0 0 0 0 0 0 0 0 0 0 0 0 0 0 0 0 0 0 0 0 0 0 0 0















rmo  
des  
ulf  
ovi  
bri  
oni  
a\_u  
ncl  
ass  
ifi  
ed|  
f\_\_  
The  
rmo  
des  
ulf  
ovi  
bri  
oni  
a\_u  
ncl  
ass  
ifi  
ed|  
g\_\_  
The  
rmo  
des  
ulf  
ovi  
bri  
oni  
a\_u  
ncl  
ass  
ifi  
ed|  
s\_\_  
The  
rmo  
des  
ulf  
ovi  
bri

oni  
a\_u  
ncl  
ass  
ifi  
ed  
d\_\_  
Bac  
ter  
ial  
p\_\_  
Pat

esc 0 1 1 0 0 6 2 0 0 2 1 6 0 0 0 1 2 0 1 0 1 2 4 0 2 2 1 4 4 3 3 2 3 0  
iba . . . . .  
cte 3 9 2 8 6 4 6 9 3 2 4 6 0 0 1 3 1 7 2 0 7 6 6 7 7 0 1 0 2 3 1 0 1 5  
ria 5 7 6 5 5 2 0 2 0 0 6 2 5 1 4 1 8 4 4 4 7 8 1 3 4 1 2 1 1 0 5 5 1 9

d\_\_  
Bac  
ter  
ial  
p\_\_  
Pat

esc  
iba  
cte  
ria

|c\_  
\_Sa  
cch

ari 0 1 1 0 0 6 2 0 0 2 1 6 0 0 0 1 2 0 1 0 1 2 4 0 2 2 1 4 4 3 3 2 3 0  
mon . . . . .  
adi 3 9 2 8 6 4 6 9 3 2 4 6 0 0 1 3 1 7 2 0 7 6 6 7 7 0 1 0 2 3 1 0 1 5  
a 5 7 6 5 5 2 0 2 0 0 6 2 5 1 4 1 8 4 4 4 7 8 1 3 4 1 2 1 1 0 5 5 1 9

d\_\_  
Bac  
ter  
ial  
p\_\_  
Pat

esc  
iba

cte . . . . .  
ria 3 9 2 8 6 4 6 9 3 2 4 6 0 0 1 3 1 7 2 0 7 6 6 7 7 0 1 0 2 3 1 0 1 5  
|c\_ 5 7 6 5 5 2 0 2 0 0 6 2 5 1 4 1 8 4 4 4 7 8 1 3 4 1 2 1 1 0 5 5 1 9





a|o  
\_\_S  
acc  
har  
imo  
nad  
ale  
s|f  
\_\_L  
WQ8  
lg\_  
\_LW  
Q8\_  
unc  
las  
sif  
ied  
|s\_  
\_LW  
Q8\_  
unc  
las  
sif  
ied  
d\_\_  
Bac  
ter  
ia|  
p\_\_  
Pat  
esc  
iba  
cte  
ria  
|c\_  
\_Sa  
cch  
ari  
mon  
adi

|     |   |   |   |   |   |   |   |   |   |   |   |   |   |   |   |   |   |   |   |   |   |   |   |   |   |   |   |   |   |   |   |   |   |   |   |   |
|-----|---|---|---|---|---|---|---|---|---|---|---|---|---|---|---|---|---|---|---|---|---|---|---|---|---|---|---|---|---|---|---|---|---|---|---|---|
| a o | 0 | 1 | 1 | 0 | 0 | 6 | 2 | 0 | 0 | 2 | 1 | 6 | 0 | 0 | 0 | 1 | 2 | 0 | 1 | 0 | 1 | 2 | 4 | 0 | 2 | 2 | 1 | 4 | 4 | 3 | 3 | 2 | 3 | 0 |   |   |
| __S | . | . | . | . | . | . | . | . | . | . | . | . | . | . | . | . | . | . | . | . | . | . | . | . | . | . | . | . | . | . | . | . | . | . | . | . |
| acc | 3 | 9 | 2 | 8 | 6 | 4 | 6 | 9 | 3 | 2 | 4 | 6 | 0 | 0 | 1 | 3 | 1 | 7 | 2 | 0 | 7 | 6 | 6 | 7 | 7 | 0 | 1 | 0 | 2 | 3 | 1 | 0 | 1 | 5 |   |   |
| har | 5 | 7 | 6 | 5 | 5 | 2 | 0 | 2 | 0 | 0 | 6 | 2 | 5 | 1 | 4 | 1 | 8 | 4 | 4 | 4 | 7 | 8 | 1 | 3 | 4 | 1 | 2 | 1 | 1 | 0 | 5 | 5 | 1 | 9 |   |   |



imo  
nad  
ale  
s|f  
\_\_S  
acc  
har  
imo  
nad  
ace  
ae  
d\_\_  
Bac  
ter  
ia|  
p\_\_  
Pat  
esc  
iba  
cte  
ria  
|c\_  
\_Sa  
cch  
ari  
mon  
adi  
a|o  
\_\_S  
acc  
har  
imo  
nad  
ace  
ae|  
g\_\_  
Can

0 1 1 0 0 6 2 0 0 2 1 6 0 0 0 1 2 0 1 0 1 2 4 0 2 2 1 4 4 3 3 2 3 0  
.  
3 9 2 8 6 4 6 9 3 2 4 6 0 0 1 3 1 7 2 0 7 6 6 7 7 0 1 0 2 3 1 0 1 5  
5 7 6 5 5 2 0 2 0 0 6 2 5 1 4 1 7 4 4 4 7 8 1 3 4 1 2 1 1 0 5 5 1 9

did  
 atu  
 s\_S  
 acc  
 har  
 imo  
 nas  
 d\_\_  
 Bac  
 ter  
 ia|  
 p\_\_  
 Pat  
 esc  
 iba  
 cte  
 ria  
 |c\_  
 \_Sa  
 cch  
 ari  
 mon  
 adi  
 a|o  
 \_\_S  
 acc  
 har  
 imo  
 nad  
 ale  
 s|f  
 \_\_S  
 acc  
 har  
 imo  
 nad  
 ace  
 ae|  
 g\_\_  
 Can

|     |   |   |   |   |   |   |   |   |   |   |   |   |   |   |   |   |   |   |   |   |   |   |   |   |   |   |   |   |   |   |   |   |   |   |   |   |
|-----|---|---|---|---|---|---|---|---|---|---|---|---|---|---|---|---|---|---|---|---|---|---|---|---|---|---|---|---|---|---|---|---|---|---|---|---|
| did | 0 | 1 | 1 | 0 | 0 | 6 | 2 | 0 | 0 | 2 | 1 | 6 | 0 | 0 | 0 | 1 | 2 | 0 | 1 | 0 | 1 | 2 | 4 | 0 | 2 | 2 | 1 | 4 | 4 | 3 | 3 | 2 | 3 | 0 |   |   |
| atu | . | . | . | . | . | . | . | . | . | . | . | . | . | . | . | . | . | . | . | . | . | . | . | . | . | . | . | . | . | . | . | . | . | . | . | . |
| s_S | 3 | 9 | 2 | 8 | 6 | 4 | 6 | 9 | 3 | 2 | 4 | 6 | 0 | 0 | 1 | 3 | 1 | 7 | 2 | 0 | 7 | 6 | 6 | 7 | 7 | 0 | 1 | 0 | 2 | 3 | 1 | 0 | 1 | 5 |   |   |
| acc | 5 | 7 | 6 | 5 | 5 | 2 | 0 | 2 | 0 | 0 | 6 | 2 | 5 | 1 | 4 | 1 | 7 | 4 | 4 | 4 | 7 | 8 | 1 | 3 | 4 | 1 | 2 | 1 | 1 | 0 | 5 | 5 | 1 | 9 |   |   |

```

har
imo
nas
|s_
_Ca
ndi
dat
us_
Sac
cha
rim
ona
s_u
ncl
ass
ifi
ed
d__
Bac
ter
ia|
p__
Pat
esc
iba
cte
ria
|c_
_Sa
cch
ari
mon
adi
a|o
__S
acc
har
imo
nad
ale
s|f          0  0
__S          .  .
acc          0  0
har 0 0 0 0 0 0 0 0 0 0 0 0 0 0 0 0 1 0 1 0 0 0 0 0 0 0 0 0 0 0 0 0 0 0 0 0 0 0 0 0

```







ia|  
p\_\_  
Pat  
esc  
iba  
cte  
ria  
|c\_  
\_Sa  
cch  
ari  
mon  
adi  
a|o  
\_\_S  
acc  
har  
imo  
nad  
ale  
s|f  
\_\_S  
acc  
har  
imo  
nad  
ale  
s\_u  
ncl  
ass  
ifi  
ed|  
g\_\_  
Sac  
cha  
rim  
ona  
dal  
es\_  
unc  
las  
sif  
ied  
|s\_

```

_Sa
cch
ari
mon
ada
les
_un
cla
ssi
fie
d
d__
Bac
ter
ia|
p__
Pla
nct          0 0 0 0          0 0 0          0 0
omy          . . . .          . . .          . .
cet          0 0 0 0          0 0 0          0 0
ota 0 0 0 0 0 0 0 0 0 1 1 0 0 0 0 0 0 0 0 0 1 1 0 2 0 0 0 0 0 0 0 0 0 0 0 0 0 0
d__
Bac
ter
ia|
p__
Pla
nct
omy
cet
ota
|c_
_Ph
yci          0 0          0          0
sph          . .          .          .
aer          0 0          0          0
ae 0 0 0 0 0 0 0 0 0 1 0 0 0 0 0 0 0 0 0 0 0 1 0 0 0 0 0 0 0 0 0 0 0 0 0 0 0 0
d__
Bac
ter
ia|          0 0          0          0
p__          . .          .          .
Pla          0 0          0          0
nct 0 0 0 0 0 0 0 0 0 1 0 0 0 0 0 0 0 0 0 0 0 1 0 0 0 0 0 0 0 0 0 0 0 0 0 0 0 0

```



omy  
 cet  
 ota  
 |c\_  
 \_Ph  
 yci  
 sph  
 aer  
 ae|  
 o\_  
 Phy  
 cis  
 pha  
 era  
 les  
 d\_  
 Bac  
 ter  
 ia|  
 p\_  
 Pla  
 nct  
 omy  
 cet  
 ota  
 |c\_  
 \_Ph  
 yci  
 sph  
 aer  
 ae|  
 o\_  
 Phy  
 cis  
 pha  
 era  
 les  
 |f\_  
 \_Ph  
 yci  
 sph                  0 0                  0                  0  
 aer                  . .                  .                  .  
 ace                  0 0                  0                  0  
 ae 0 0 0 0 0 0 0 0 0 1 0 0 0 0 0 0 0 0 0 1 0 0 0 0 0 0 0 0 0 0 0 0 0 0 0 0 0 0

d\_\_  
Bac  
ter  
ia |  
p\_\_  
Pla  
nct  
omy  
cet  
ota  
|c\_  
\_Ph  
yci  
sph  
aer  
ae |  
o\_\_  
Phy  
cis  
pha  
era  
les  
|f\_  
\_Ph  
yci  
sph  
aer  
ace  
ae | 0 0 0 0  
g\_\_ . . . .  
SM1 0 0 0 0  
A02 0 0 0 0 0 0 0 0 0 1 0 0 0 0 0 0 0 0 0 0 0 1 0 0 0 0 0 0 0 0 0 0 0 0 0 0 0 0 0 0 0 0 0 0 0 0  
d\_\_  
Bac  
ter  
ia |  
p\_\_  
Pla  
nct  
omy  
cet 0 0 0 0  
ota . . . .  
|c\_  
\_Ph 0 0 0 0 0 0 0 0 0 1 0 0 0 0 0 0 0 0 0 0 0 1 0 0 0 0 0 0 0 0 0 0 0 0 0 0 0 0 0 0 0 0 0  
\_Ph

```

yci
sph
aer
ae|
o__
Phy
cis
pha
era
les
|f_
_Ph
yci
sph
aer
ace
ae|
g__
SM1
A02
|s_
_SM
1A0
2_u
ncl
ass
ifi
ed
d__
Bac
ter
ia|
p__
Pla
nct
omy
cet
ota
|c_
_Pl
anc          0 0 0 0          0 0 0          0
tom          . . . .          . . .          .
yce          0 0 0 0          0 0 0          0
tes 0 0 0 0 0 0 0 0 0 1 0 0 0 0 0 0 0 0 0 0 1 0 2 0 0 0 0 0 0 0 0 0 0 0 0 0 0 0 0 0 0 0

```





|     |   |
|-----|---|
| ter | 0 |
| ial | 0 |
| p__ |   |
| Pla |   |
| nct |   |
| omy |   |
| cet |   |
| ota |   |
| c_  |   |
| _Pl |   |
| anc |   |
| tom |   |
| yce |   |
| tes |   |
| o_  |   |
| _Is |   |
| osp |   |
| hae |   |
| ral |   |
| es  |   |
| f__ |   |
| Iso |   |
| sph |   |
| aer |   |
| ace |   |
| ae  |   |
| g__ |   |
| Can |   |
| did |   |
| atu |   |
| s_N |   |
| ost |   |
| oco |   |
| ida |   |
| s_  |   |
| _Ca |   |
| ndi |   |
| dat |   |
| us_ |   |
| Nos |   |
| toc |   |
| oid |   |
| a_u |   |
| ncl |   |















```

omy
cet
ale
s_u
ncl
ass
ifi
ed|
g__
Pla
nct
omy
cet
ale
s_u
ncl
ass
ifi
ed|
s__
Pla
nct
omy
cet
ale
s_u
ncl
ass
ifi
ed
d__
Bac
ter
ia|
p__
Pla
nct
omy
cet
ota
|c_          0 0 0 0          0 0
_Pl          . . . .          . .
anc          0 0 0 0          0 0
tom 0 0 0 0 0 0 0 0 0 1 0 0 0 0 0 0 0 0 0 0 1 0 1 0 0 0 0 0 0 0 0 0 0 0 0 0 0 0

```

```

yce
tes
|o_
_Pl
anc
tom
yce
tal
es|
f__
Rub
ini
sph
aer
ace
ae
d__
Bac
ter
ia|
p__
Pla
nct
omy
cet
ota
|c_
_Pl
anc
tom
yce
tes
|o_
_Pl
anc
tom
yce
tal
es|
f__
Rub          0 0 0 0          0 0
ini          . . . .          . .
sph          0 0 0 0          0 0
aer 0 0 0 0 0 0 0 0 0 1 0 0 0 0 0 0 0 0 0 0 1 0 1 0 0 0 0 0 0 0 0 0 0 0

```

```

ace
ae|
g__
Pla
nct
omi
cro
biu
m
d__
Bac
ter
ia|
p__
Pla
nct
omy
cet
ota
|c_
_Pl
anc
tom
yce
tes
|o_
_Pl
anc
tom
yce
tal
es|
f__
Rub
ini
sph
aer
ace
ae|
g__
Pla          0 0 0 0          0 0
nct          . . . .          . .
omi          0 0 0 0          0 0
cro 0 0 0 0 0 0 0 0 0 1 0 0 0 0 0 0 0 0 0 0 0 0 1 0 1 0 0 0 0 0 0 0 0 0 0 0 0 0

```











ia|  
c\_\_  
Alp  
hap  
rot  
eob  
act  
eri  
a|o  
\_\_A  
lph  
apr  
ote  
oba  
cte  
ria  
\_un  
cla  
ssi  
fie  
d|f  
\_\_A  
lph  
apr  
ote  
oba  
cte  
ria  
\_un  
cla  
ssi  
fie  
d|g  
\_\_A  
lph  
apr  
ote  
oba  
cte  
ria  
\_un  
cla  
ssi  
fie

































```

unc
las
sif
ied
|s_
_Mi
cav
ibr
ion
ale
s_u
ncl
ass
ifi
ed
d__
Bac
ter
ia|
p__
Pro
teo
bac
ter
ia|
c__
Alp
hap
rot
eob
act
eri
a|o
__R
eyr      0      0      0 0
ane      .      .      . .
lla      0      0      0 0
les 0 0 0 0 1 0 0 0 0 0 0 0 0 0 0 0 0 0 0 0 0 0 0 0 0 0 0 0 0 0 0 0 1 1
d__
Bac
ter      0      0      0 0
ia|      .      .      . .
p__      0      0      0 0
Pro 0 0 0 0 1 0 0 0 0 0 0 0 0 0 0 0 0 0 0 0 0 0 0 0 0 0 0 0 0 0 1 1

```





yra  
nel  
la|  
s\_\_  
Rey  
ran  
ell  
a\_u  
ncl  
ass  
ifi  
ed  
d\_\_  
Bac  
ter  
ia|  
p\_\_  
Pro  
teo  
bac  
ter  
ia|  
c\_\_  
Alp  
hap  
rot  
eob  
act  
eri  
a|o  
\_\_R

|     |      |      |      |      |                |          |          |
|-----|------|------|------|------|----------------|----------|----------|
| hiz | 0    | 00   | 000  | 00   | 00000000000000 | 00000    | 00       |
| obi | .    | ..   | ...  | ..   | .....          | ....     | ..       |
| ale | 0    | 01   | 000  | 00   | 00000000000000 | 0001     | 00       |
| s   | 000  | 1000 | 6010 | 1700 | 61121080       | 10081100 | 110      |
| d__ |      |      |      |      |                |          |          |
| Bac |      |      |      |      |                |          |          |
| ter |      |      |      |      |                |          |          |
| ia  |      |      |      |      |                |          |          |
| p__ |      |      |      |      |                |          |          |
| Pro |      | 0    | 0    | 0    | 0              | 0000     | 0000     |
| teo |      | .    | .    | .    | .              | ....     | ..       |
| bac |      | 0    | 0    | 0    | 0              | 0000     | 0000     |
| ter | 0000 | 7002 | 0100 | 5003 | 001103         | 0000     | 40030000 |

```

ia|
c__
Alp
hap
rot
eob
act
eri
a|o
__R
hiz
obi
ale
s|f
__B
eij
eri
nck
iac
eae
d__
Bac
ter
ia|
p__
Pro
teo
bac
ter
ia|
c__
Alp
hap
rot
eob
act
eri
a|o
__R
hiz
obi          0          0 0          0    0
ale          .          . .          .    .
s|f          0          0 0          0    0
__B 0 0 0 0 0 0 0 0 0 0 1 0 0 0 0 0 0 0 0 0 1 1 0 0 0 0 0 0 0 0 0 0 0 0 0 0 0 0 0 0 0 0

```

```

eij
eri
nck
iac
eae
lg_
_Ch
ela
toc
occ
us
d__
Bac
ter
ia|
p__
Pro
teo
bac
ter
ia|
c__
Alp
hap
rot
eob
act
eri
a|o
__R
hiz
obi
ale
s|f
__B
eij
eri
nck
iac
eae
lg_           0           0 0           0   0
_Ch           .           . .           .   .
ela           0           0 0           0   0
toc 0 0 0 0 0 0 0 0 0 1 0 0 0 0 0 0 0 0 1 1 0 0 0 0 0 0 0 0 0 0 0 0 0 0 0 0

```



```

occ
us|
s__
Che
lat
oco
ccu
s_u
ncl
ass
ifi
ed
d__
Bac
ter
ia|
p__
Pro
teo
bac
ter
ia|
c__
Alp
hap
rot
eob
act
eri
a|o
__R
hiz
obi
ale
s|f
__B
eij
eri
nck
iac
eae      0    0      0    0      0 0 0    0    0
lg_      .    .      .    .      . . .    .    .
_Me      0    0      0    0      0 0 0    0    0
thy 0 0 0 0 7 0 0 2 0 0 0 0 5 0 0 3 0 0 0 1 0 3 0 0 0 0 4 0 0 3 0 0 0 0

```

```

lob
act
eri
um-
Met
hyl
oru
bru
m
d__
Bac
ter
ia|
p__
Pro
teo
bac
ter
ia|
c__
Alp
hap
rot
eob
act
eri
a|o
__R
hiz
obi
ale
s|f
__B
eij
eri
nck
iac
eae
lg_
_Me
thy      0    0      0    0      0 0 0      0    0
lob      .    .      .    .      . . .      .    .
act      0    0      0    0      0 0 0      0    0
eri 0 0 0 0 7 0 0 2 0 0 0 0 5 0 0 3 0 0 0 1 0 3 0 0 0 0 4 0 0 3 0 0 0 0

```



s|f

\_\_B

eij

eri

nck

iac

eae

lg\_

\_Mi

cro

vir

ga

d\_\_

Bac

ter

ia|

p\_\_

Pro

teo

bac

ter

ia|

c\_\_

Alp

hap

rot

eob

act

eri

a|o

\_\_R

hiz

obi

ale

s|f

\_\_B

eij

eri

nck

iac

eae

lg\_

\_Mi

cro

0 0 0 0 0 0 0 0 0 0 0 0 0 0 0 0 0 0 0 0 0 0 0 0 0 0 0 0



|     |         |         |                     |     |               |             |       |         |
|-----|---------|---------|---------------------|-----|---------------|-------------|-------|---------|
| ia  | 0       | 1       | 4                   |     | 2 1 1 1       | 4           | 1     | 4       |
| p__ |         |         |                     |     |               |             |       |         |
| Pro |         |         |                     |     |               |             |       |         |
| teo |         |         |                     |     |               |             |       |         |
| bac |         |         |                     |     |               |             |       |         |
| ter |         |         |                     |     |               |             |       |         |
| ia  |         |         |                     |     |               |             |       |         |
| c__ |         |         |                     |     |               |             |       |         |
| Alp |         |         |                     |     |               |             |       |         |
| hap |         |         |                     |     |               |             |       |         |
| rot |         |         |                     |     |               |             |       |         |
| eob |         |         |                     |     |               |             |       |         |
| act |         |         |                     |     |               |             |       |         |
| eri |         |         |                     |     |               |             |       |         |
| a o |         |         |                     |     |               |             |       |         |
| __R |         |         |                     |     |               |             |       |         |
| hiz |         |         |                     |     |               |             |       |         |
| obi |         |         |                     |     |               |             |       |         |
| ale |         |         |                     |     |               |             |       |         |
| s f |         |         |                     |     |               |             |       |         |
| __B |         |         |                     |     |               |             |       |         |
| rad |         |         |                     |     |               |             |       |         |
| yrh |         |         |                     |     |               |             |       |         |
| izo |         |         |                     |     |               |             |       |         |
| bia |         |         |                     |     |               |             |       |         |
| cea |         |         |                     |     |               |             |       |         |
| e g |         |         |                     |     |               |             |       |         |
| __B |         |         |                     |     |               |             |       |         |
| rad |         |         |                     |     |               |             |       |         |
| yrh |         |         |                     |     |               |             |       |         |
| izo |         |         |                     |     |               |             |       |         |
| biu |         |         |                     |     |               |             |       |         |
| m   |         |         |                     |     |               |             |       |         |
| d__ |         |         |                     |     |               |             |       |         |
| Bac |         |         |                     |     |               |             |       |         |
| ter |         |         |                     |     |               |             |       |         |
| ia  |         |         |                     |     |               |             |       |         |
| p__ |         |         |                     |     |               |             |       |         |
| Pro |         |         |                     |     |               |             |       |         |
| teo |         |         |                     |     |               |             |       |         |
| bac | 0       | 0       | 0                   |     | 0 0 0 0       | 0           | 0     | 0       |
| ter | .       | .       | .                   |     | . . . .       | .           | .     | .       |
| ia  | 0       | 0       | 0                   |     | 0 0 0 0       | 0           | 0     | 0       |
| c__ | 0 0 0 0 | 1 0 0 4 | 0 0 0 0 0 0 0 0 0 0 | 0 2 | 1 1 1 1 0 0 4 | 0 0 0 0 0 1 | 0 0 4 | 0 0 0 0 |



























```

s|f
__P
leo
mor
pho
mon
ada
cea
elg
__P
leo
mor
pho
mon
as
d__
Bac
ter
ia|
p__
Pro
teo
bac
ter
ia|
c__
Alp
hap
rot
eob
act
eri
a|o
__R
hiz
obi
ale
s|f
__P
leo
mor          0          0          0
pho          .          .          .
mon          0          0          0
ada 0 0 0 0 1 0 0 0 0 0 0 0 1 0 0 0 0 0 0 0 0 0 0 0 0 1 0 0 0 0 0 0 0

```

cea  
e|g  
\_\_P  
leo  
mor  
pho  
mon  
as|  
s\_\_  
Ple  
omo  
rph  
omo  
nas  
\_un  
cla  
ssi  
fie  
d  
d\_\_  
Bac  
ter  
ial  
p\_\_  
Pro  
teo  
bac  
ter  
ial  
c\_\_  
Alp  
hap  
rot  
eob  
act  
eri  
alo  
\_\_R  
hiz  
obi  
ale 0 0 0 0 0 0  
s|f . . . . .  
\_\_R 0 0 0 0 0 0  
hiz 0 0 0 0 0 0 0 0 0 0 0 0 0 0 0 0 0 0 0 0 0 0 0 0 0 0

obi

ace

ae

d\_\_

Bac

ter

ia|

p\_\_

Pro

teo

bac

ter

ia|

c\_\_

Alp

hap

rot

eob

act

eri

a|o

\_\_R

hiz

obi

ale

s|f

\_\_R

hiz

obi

ace

ae|

g\_\_

Ali

0

iho

.

efl

0

ea

0 0 0 0 0 0 0 0 0 0 0 0 0 0 0 0 0 1 0 0 0 0 0 0 0 0 0 0 0 0 0

d\_\_

Bac

ter

ia|

p\_\_

0

Pro

.

teo

0

bac

0 0 0 0 0 0 0 0 0 0 0 0 0 0 0 0 0 1 0 0 0 0 0 0 0 0 0 0 0 0 0

```

ter
ial
c__
Alp
hap
rot
eob
act
eri
a|o
__R
hiz
obi
ale
s|f
__R
hiz
obi
ace
ae|
g__
Ali
iho
efl
ea|
s__
Ali
iho
efl
ea_
unc
las
sif
ied
d__
Bac
ter
ial
p__
Pro
teo          0          0
bac          .          .
ter          0          0
ial 0 0 0 0 0 0 0 0 0 1 0 0 0 0 0 0 0 0 0 0 0 0 0 0 0 0 0 0 0 0 0 0

```



bac  
ter  
ial  
c\_\_  
Alp  
hap  
rot  
eob  
act  
eri  
a|o  
\_\_R  
hiz  
obi  
ale  
s|f  
\_\_R  
hiz  
obi  
ace  
ae|  
g\_\_  
All  
orh  
izo  
biu  
m-  
Neo  
rhi  
zob  
ium  
-  
Par  
arh  
izo  
biu  
m-  
Rhi  
zob  
ium  
|s\_  
\_Al  
lor  
hiz

























Alp  
 hap  
 rot  
 eob  
 act  
 eri  
 a|o  
 \_\_R  
 hiz  
 obi  
 ale  
 s|f  
 \_\_R  
 hod  
 omi  
 cro  
 bia  
 cea  
 e|g  
 \_\_R  
 hod  
 omi  
 cro  
 biu  
 m|s  
 \_\_R  
 hod  
 omi  
 cro  
 biu  
 m\_u  
 ncl  
 ass  
 ifi  
 ed  
 d\_\_  
 Bac  
 ter  
 ia|  
 p\_\_  
 Pro           0                   0 0       0       0           0           0  
 teo           .<                   . .       .       .           .           .  
 bac           0                   0 0       0       0           0           0  
 ter 0 0 0 1 0 0 0 0 0 0 0 0 1 2 0 0 1 0 0 1 0 0 0 0 0 1 0 0 0 0 0 0 1 0 0 0 0



```

__X
ant
hob
act
era
cea
e|g
__B
rad
yrh
izo
biu
m
d__
Bac
ter
ial
p__
Pro
teo
bac
ter
ial
c__
Alp
hap
rot
eob
act
eri
a|o
__R
hiz
obi
ale
s|f
__X
ant
hob
act
era           0   0           0
cea           .   .           .
e|g           0   0           0
__B 0 0 0 0 0 0 0 0 0 0 0 0 0 2 0 0 1 0 0 0 0 0 0 0 0 0 0 0 0 0 0 0 0 0 0 0 0 1 0 0 0 0

```





```

lab
rys
_sp
.
d__
Bac
ter
ia|
p__
Pro
teo
bac
ter
ia|
c__
Alp
hap
rot
eob
act
eri
a|o
__R
hiz
obi
ale
s|f
__X
ant
hob
act
era
cea
e|g
__T      0      0      0
ard      .      .      .
iph      0      0      0
aga 0 0 0 1 0 0 0 0 0 0 0 0 1 0 0 0 0 0 0 0 0 0 0 0 0 0 1 0 0 0 0 0 0 0 0 0 0 0
d__
Bac
ter      0      0      0
ia|      .      .      .
p__      0      0      0
Pro 0 0 0 1 0 0 0 0 0 0 0 0 1 0 0 0 0 0 0 0 0 0 0 0 0 0 1 0 0 0 0 0 0 0 0 0 0 0

```

```

teo
bac
ter
ial
c__
Alp
hap
rot
eob
act
erial
alo
__R
hiz
obi
ale
s|f
__X
ant
hob
act
era
cea
elg
__T
ard
iph
aga
|s_
_Ta
rdi
pha
ga_
unc
las
sif
ied
d__
Bac
ter
ial           0
p__          .
Pro          0
teo 0 0 0 0 0 0 0 0 0 0 0 0 0 0 0 0 0 0 0 1 0 0 0 0 0 0 0 0 0 0 0 0 0 0 0 0 0 0 0 0 0

```





c\_\_  
Alp  
hap  
rot  
eob  
act  
eri  
a|o  
\_\_R  
hiz  
obi  
ale  
s|f  
\_\_X  
ant  
hob  
act  
era  
cea  
e|g  
\_\_X  
ant  
hob  
act  
era  
cea  
e\_u  
ncl  
ass  
ifi  
ed|  
s\_\_  
Xan  
tho  
bac  
ter  
ace  
ae\_  
unc  
las  
sif  
ied  
d\_\_ 0 0 0 0 0 0 0 0 0 0 0 0 0 0 0 0 0 0  
Bac . . . . . 0 0 0 0 0 0 0 0 0 0 0 0 0 0 0 0 0 0

ter 0 0 0 0 0 0 0 0 0 0 0 0 0 0 0 0 0 0  
ial 1 1 1 1 5 2 2 2 2 2 1 2 9 3 4 6 5 8 4  
p\_\_  
Pro  
teo  
bac  
ter  
ial  
c\_\_  
Alp  
hap  
rot  
eob  
act  
eri  
a|o  
\_\_R  
hod  
oba  
cte  
ral  
es  
d\_\_  
Bac  
ter  
ial  
p\_\_  
Pro  
teo  
bac  
ter  
ial  
c\_\_  
Alp  
hap  
rot  
eob  
act  
eri  
a|o  
\_\_R 0 0 0 0 0 0 0 0 0 0 0 0 0 0 0 0 0 0  
hod . . . . .  
oba 0 0 0 0 0 0 0 0 0 0 0 0 0 0 0 0 0 0  
cte 1 1 1 1 5 2 2 2 2 2 1 2 9 3 4 6 5 8 4 0 0 0 0 0 0 0 0 0 0 0 0 0 0 0 0

ral  
es|  
f\_\_  
Rho  
dob  
act  
era  
cea

e  
d\_\_  
Bac  
ter  
ia|  
p\_\_  
Pro  
teo  
bac  
ter  
ia|  
c\_\_

Alp  
hap  
rot  
eob  
act  
eri  
a|o

\_\_R  
hod  
oba  
cte  
ral  
es|

f\_\_  
Rho  
dob  
act  
era  
cea  
e|g

\_\_G  
emm  
oba  
cte

0  
. 0  
2 0 0 0 0 0 0 0 0 0 0 0 0 0 0 0 0 0 0 0 0 0 0



us  
d\_\_  
Bac  
ter  
ia|  
p\_\_  
Pro  
teo  
bac  
ter  
ia|  
c\_\_  
Alp  
hap  
rot  
eob  
act  
eri  
a|o  
\_\_R  
hod  
oba  
cte  
ral  
es|  
f\_\_  
Rho  
dob  
act  
era  
cea  
e|g  
\_\_M  
ari  
tim 0 0 0 0 0 0 0  
iba . . . . .  
cte 0 0 0 0 0 0  
r 1 1 0 0 1 1 0 0 0 0 0 1 3 0 1 0 0 1 0 0 0 0 0 0 0 0 0 0 0 0 0 0 0 0 0 0 0 0 0 0  
d\_\_  
Bac  
ter 0 0 0 0 0 0  
ia| . . . . .  
p\_\_ 0 0 0 0 0 0  
Pro 1 1 0 0 1 1 0 0 0 0 0 1 3 0 1 0 0 1 0 0 0 0 0 0 0 0 0 0 0 0 0 0 0 0 0 0 0 0 0 0







rot  
 eob  
 act  
 eri  
 alo  
 \_\_R  
 hod  
 oba  
 cte  
 ral  
 es|  
 f\_\_  
 Rho  
 dob  
 act  
 era  
 cea  
 e|g  
 \_\_P  
 ara  
 coc  
 cus  
 |s\_  
 \_Pa  
 rac  
 occ  
 us\_  
 ang  
 ust  
 ae  
 d\_\_  
 Bac  
 ter  
 ia|  
 p\_\_  
 Pro  
 teo  
 bac  
 ter  
 ia|  
 c\_\_  
 Alp  
 hap  
 rot

0 0 0 0 0 0 0 0 0 0 0 0 0 0 0 0 0 0 0 0 0 0 0 0 0 0 0 0











act  
 eri  
 a|o  
 \_\_R  
 hod  
 oba  
 cte  
 ral  
 es|  
 f\_\_  
 Rho  
 dob  
 act  
 era  
 cea  
 e|g  
 \_\_R  
 ose  
 ova  
 riu  
 s|s  
 \_\_R  
 ose  
 ova  
 riu  
 s\_a  
 nta  
 rct  
 icu  
 s  
 d\_\_  
 Bac  
 ter  
 ia|  
 p\_\_  
 Pro  
 teo  
 bac  
 ter  
 ia|  
 c\_\_  
 Alp  
 hap  
 rot

0 0 0 0 0 0 0 0 0 0 0 0 0 0 0 0

. . . . .

0 0 0 0 0 0 0 0 0 0 0 0 0 0 0 0

0 0 1 1 3 1 2 1 2 2 1 1 7 3 3 6 5 6 1 0 0 0 0 0 0 0 0 0 0 0 0 0 0 0 0 0 0 0 0 0 0 0 0 0 0 0 0

eob  
act  
eri  
a|o  
\_\_R  
hod  
oba  
cte  
ral  
es|  
f\_\_  
Rho  
dob  
act  
era  
cea  
e|g  
\_\_S  
ulf  
ito  
bac  
ter  
d\_\_  
Bac  
ter  
ia|  
p\_\_  
Pro  
teo  
bac  
ter  
ia|  
c\_\_  
Alp  
hap  
rot  
eob  
act  
eri  
a|o  
\_\_R

0 0 0 0 0 0 0 0 0 0 0 0 0 0 0 0 0  
.  
0 0 0 0 0 0 0 0 0 0 0 0 0 0 0 0 0  
cte 0 0 1 1 3 1 2 1 2 2 1 1 7 3 3 6 5 6 1 0 0 0 0 0 0 0 0 0 0 0 0 0 0



ral  
es|  
f\_\_  
Rho  
dob  
act  
era  
cea  
elg  
\_\_S  
ulf  
ito  
bac  
ter  
|s\_  
\_Su  
lfi  
tob  
act  
er\_  
unc  
las  
sif  
ied  
d\_\_  
Bac  
ter  
ia|  
p\_\_  
Pro  
teo  
bac  
ter  
ia|  
c\_\_  
Alp  
hap  
rot  
eob  
act  
eri    0 0 0 0 0 0 0 0 0 0    0 0    0 0 0 0                0 0 0 0 0 0                0 0    0  
alo    . . . . . . . . . . . . .    . .    . . . . .                . . . . .                . .    .  
\_\_R    0 0 0 0 0 0 0 0 2 0    0 0    0 0 0 0                0 0 0 0 0 0                0 0    0  
hod 0 9 5 4 0 2 1 1 3 2 0 0 2 0 1 3 6 2 0 0 0 0 0 1 2 3 6 1 0 0 0 3 1 0 1

osp  
iri  
lla  
les  
d\_\_  
Bac  
ter  
ia|  
p\_\_  
Pro  
teo  
bac  
ter  
ia|  
c\_\_  
Alp  
hap  
rot  
eob  
act  
eri  
a|o  
\_\_R  
hod  
osp  
iri  
lla  
les  
|f\_  
\_Rh  
odo  
spi  
ril  
lac  
eae  
d\_\_  
Bac  
ter  
ia|  
p\_\_  
Pro  
teo  
bac  
ter

|                                                                     |     |           |             |       |
|---------------------------------------------------------------------|-----|-----------|-------------|-------|
| 0 0 0 0 0 0 0 0 0 0                                                 | 0 0 | 0 0 0 0   | 0 0 0 0 0 0 | 0 0 0 |
| . . . . .                                                           | . . | . . . . . | . . . . .   | . . . |
| 0 0 0 0 0 0 0 2 0                                                   | 0 0 | 0 0 0 0   | 0 0 0 0 0   | 0 0 0 |
| 0 8 5 4 0 1 1 1 3 2 0 0 2 0 1 3 6 2 0 0 0 0 1 2 3 6 1 0 0 0 3 1 0 1 |     |           |             |       |
| 0 0 0 0                                                             |     | 0 0 0     |             |       |
| . . . .                                                             |     | . . .     |             |       |
| 0 0 0 0                                                             |     | 0 0 0     |             |       |
| 0 2 1 1 0 0 0 0 0 0 0 0 0 0 2 3 2 0 0 0 0 0 0 0 0 0 0 0 0 0 0 0 0 0 |     |           |             |       |

```

ia|
c__
Alp
hap
rot
eob
act
eri
a|o
__R
hod
osp
iri
lla
les
|f_
_Rh
odo
spi
ril
lac
eae
|g_
_Do
ngi
a
d__
Bac
ter
ia|
p__
Pro
teo
bac
ter
ia|
c__
Alp
hap
rot
eob  0 0 0 0                    0 0 0
act  . . . .                    . . .
eri  0 0 0 0                    0 0 0
a|o  0 2 1 1 0 0 0 0 0 0 0 0 0 0 2 3 2 0 0 0 0 0 0 0 0 0 0 0 0 0 0 0 0 0

```

```

__R
hod
osp
iri
lla
les
|f_
_Rh
odo
spi
ril
lac
eae
|g_
_Do
ngi
a|s
__u
ncu
ltu
red
_Do
ngi
a_s
p.
d__
Bac
ter
ia|
p__
Pro
teo
bac
ter
ia|
c__
Alp
hap
rot
eob
act  0 0 0  0 0  0      0  0 0 0 0      0 0 0 0 0      0 0  0
eri  . . .  . .  .      .  . . . .      . . . . .      . .  .
a|o  0 0 0  0 0  1      0  0 0 0 0      0 0 0 0 0      0 0  0
__R  0 6 3 3 0 1 1 0 8 0 0 0 2 0 1 1 2 0 0 0 0 0 0 1 1 2 5 1 0 0 0 3 1 0 1

```

hod  
 osp  
 iri  
 lla  
 les  
 |f\_  
 \_Rh  
 odo  
 spi  
 ril  
 lac  
 eae  
 |g\_  
 \_In  
 sol  
 iti  
 spi  
 ril  
 lum  
 d\_  
 Bac  
 ter  
 ia|  
 p\_  
 Pro  
 teo  
 bac  
 ter  
 ia|  
 c\_  
 Alp  
 hap  
 rot  
 eob  
 act  
 eri  
 alo  
 \_\_R  
 hod  
 osp  
 iri    0 0 0    0 0    0            0    0 0 0 0            0 0 0 0 0            0 0    0  
 lla    . . .    . .    .            .    . . . . .            . . . . .            . .    .  
 les    0 0 0    0 0    1            0    0 0 0 0            0 0 0 0 0            0 0    0  
 |f\_    0 6 3 3 0 1 1 0 8 0 0 0 2 0 1 1 2 0 0 0 0 0 0 1 1 2 5 1 0 0 0 3 1 0 1

```

_Rh
odo
spi
ril
lac
eae
lg_
_In
sol
iti
spi
ril
lum
ls_
_un
cul
tur
ed_
Ins
oli
tis
pir
ill
um_
sp.
d__
Bac
ter
ia|
p__
Pro
teo
bac
ter
ia|
c__
Alp
hap
rot
eob
act  0      0 0 0 0 0  0      0      0 0 0
eri  .      . . . . .  .      .      . . .
a|o  0      0 0 0 0 0  0      0      0 0 0
__R  0 1 0 0 0 0 1 1 5 2 0 0 0 0 0 0 1 0 0 0 0 0 0 0 1 0 1 0 0 0 0 0 0 0 0

```

```

hod
osp
iri
lla
les
|f_
_Rh
odo
spi
ril
lac
eae
|g_
_Th
ala
sso
spi
ra
d__
Bac
ter
ia|
p__
Pro
teo
bac
ter
ia|
c__
Alp
hap
rot
eob
act
eri
a|o
__R
hod
osp
iri
lla  0      0 0 0 0 0  0      0      0 0 0
les  .      . . . . .  .      .      . . .
|f_  0      0 0 0 0 0  0      0      0 0 0
_Rh  0 1 0 0 0 0 1 1 5 2 0 0 0 0 0 0 1 0 0 0 0 0 0 1 0 1 0 0 0 0 0 0 0 0

```





lla  
les  
|f\_  
\_Rh  
odo  
spi  
ril  
lal  
es\_  
unc  
las  
sif  
ied  
d\_\_  
Bac  
ter  
ial  
p\_\_  
Pro  
teo  
bac  
ter  
ial  
c\_\_  
Alp  
hap  
rot  
eob  
act  
eri  
a|o  
\_\_R  
hod  
osp  
iri  
lla  
les  
|f\_  
\_Rh  
odo  
spi 0 0  
ril . .  
lal 0 0  
es\_ 0 0 0 0 0 1 0 0 0 0 0 0 0 0 0 0 0 0 0 0 0 0 0 0 0 0 0 0 0 0 0 0 0 0 0 0









```

eob
act
eri
a|o
__R
ick
ett
sia
les
|f_
_Mi
toc
hon
dri
alg
__M
ito
cho
ndr
ia_
unc
las
sif
ied
|s_
_Mi
toc
hon
dri
a_u
ncl
ass
ifi
ed
d__
Bac
ter
ia|
p__
Pro
teo          0          0  0          0  0  0
bac          .          .  .          .  .  .
ter          0          0  0          0  0  0
ia| 0 0 0 0 4 0 0 0 0 0 0 0 0 0 0 0 1 0 0 6 0 0 0 0 0 0 0 0 0 2 0 0 2 0 1 0 0

```

```

c__
Alp
hap
rot
eob
act
eri
a|o
__S
phi
ngo
mon
ada
les
d__
Bac
ter
ia|
p__
Pro
teo
bac
ter
ia|
c__
Alp
hap
rot
eob
act
eri
a|o
__S
phi
ngo
mon
ada
les
|f_
_Sp
hin      0          0  0          0  0  0
gom      .          .  .          .  .  .
ona      0          0  0          0  0  0
dac 0 0 0 0 4 0 0 0 0 0 0 0 0 0 0 0 1 0 0 6 0 0 0 0 0 0 0 0 0 0 2 0 0 2 0 1 0 0

```









ia|  
c\_\_  
Alp  
hap  
rot  
eob  
act  
eri  
a|o  
\_\_s  
phi  
ngo  
mon  
ada  
les  
|f\_  
\_Sp  
hin  
gom  
ona  
dac  
eae  
|g\_  
\_Sp  
hin  
gob  
ium  
|s\_  
\_Sp  
hin  
gob  
ium  
\_ya  
noi  
kuy  
ae  
d\_\_  
Bac  
ter  
ia|

p\_\_            0                                        0    0                                        0    0  
Pro            .                                        .    .                                        .    .  
teo            0                                        0    0                                        0    0  
bac 0 0 0 0 4 0 0 0 0 0 0 0 0 0 0 0 1 0 0 6 0 0 0 0 0 0 0 0 0 0 2 0 0 1 0 0 0 0







```

act
eri
a|o
__S
phi
ngo
mon
ada
les
|f_
_Sp
hin
gom
ona
dac
eae
|g_
_Sp
hin
gom
ona
s|s
__S
phi
ngo
mon
as_
sp.
_ce
40
d__
Bac
ter
ia|
p__
Pro
teo
bac
ter
ia|
c__      0
Alp      .
hap      0
rot 0 0 0 0 0 0 0 0 0 0 0 0 0 0 0 0 0 0 0 0 0 0 0 6 0 0 0 0 0 0 0 0 0 0 0 0 0 0 0 0 0 0

```





```

hap
rot
eob
act
eri
a|o
__s
phi
ngo
mon
ada
les
|f_
_Sp
hin
gom
ona
dac
eae
|g_
_Sp
hin
gom
ona
s|s
__u
ncu
ltu
red
_Sp
hin
gom
ona
s_s
p.
d__
Bac
ter
ia|
p__
Pro      0  0              0  0  0              0
teo      .  .              .  .  .              .
bac      0  0              0  0  0              0
ter 0 0 0 0 1 0 0 0 0 0 0 0 0 0 0 0 0 0 0 0 0 0 0 0 5 0 0 1 0 0 0 0 0 0 0 0 0 0 0 1 0 0 0 0

```







ter  
ial  
p\_\_  
Pro  
teo  
bac  
ter  
ial  
c\_\_  
Bet  
apr  
ote  
oba  
cte  
ria  
|o\_  
\_Be  
tap  
rot  
eob  
act  
eri  
a\_u  
ncl  
ass  
ifi  
ed|  
f\_\_  
Bet  
apr  
ote  
oba  
cte  
ria  
\_un  
cla  
ssi  
fie  
d|g  
\_\_B  
eta  
pro  
teo  
bac

```

ter
ia_
unc
las
sif
ied
|s_
_Be
tap
rot
eob
act
eri
a_u
ncl
ass
ifi
ed
d__
Bac
ter
ial
p__
Pro
teo
bac
ter
ial
c__
Bet
apr
ote
oba
cte
ria
|o_
_Bu
rkh
old      0  0          0  0  0          0
eri      .  .          .  .  .          .
ale      0  0          0  0  0          0
s        0 0 0 0 1 0 0 0 0 0 0 0 0 0 0 0 0 0 5 0 0 1 0 0 0 0 0 0 0 0 0 0 0 0 1 0 0 0 0 0
d__      0  0          0  0  0          0
Bac      0 0 . 0 . 0 0 0 0 0 0 0 0 0 0 0 . 0 0 0 . 0 0 0 0 0 0 0 0 0 0 . 0 0 0 0 0

```















```

mon
as|
s__
Com
amo
nas
_de
nit
rif
ica
ns
d__
Bac
ter
ia|
p__
Pro
teo
bac
ter
ia|
c__
Bet
apr
ote
oba
cte
ria
lo_
_Bu
rkh
old
eri
ale
s|f
__C
oma
mon
ada
cea
el|g      0      0      0      0
__P      .      .      .      .
elo      0      0      0      0
mon 0 0 0 0 0 0 0 0 0 0 0 0 0 0 0 0 0 0 0 0 0 4 0 0 1 0 0 0 0 0 0 0 0 0 0 0 0 0 0 0 0 0

```











odo  
cyc  
lac  
eae  
\_un  
cla  
ssi  
fie  
d  
d\_\_  
Bac  
ter  
ia|  
p\_\_  
Pro  
teo  
bac  
ter  
ia|  
c\_\_  
Del  
tap  
rot

|     |                                                                     |                                                     |
|-----|---------------------------------------------------------------------|-----------------------------------------------------|
| eob | 0 0 0 0 0 0 0 0                                                     | 0 1 0 0 0 0 0 0 0 1 0 0 0 0 0 0 0 0 0 0 0 0 0 0 0 0 |
| act | . . . . .                                                           | . . . . .                                           |
| eri | 0 0 5 2 0 3 0 0                                                     | 2 0 2 1 1 2 0 2 0 0 4 1 5 3 0 1 0 0 3 0 0 1 1 1 2   |
| a   | 1 3 0 0 6 0 1 5 0 8 2 3 9 5 1 3 0 2 1 0 0 7 4 4 0 4 3 6 5 2 7 6 5 3 |                                                     |

d\_\_  
Bac  
ter  
ia|  
p\_\_  
Pro  
teo  
bac  
ter  
ia|  
c\_\_  
Del  
tap  
rot

|     |                                                                     |                                                     |
|-----|---------------------------------------------------------------------|-----------------------------------------------------|
| eob | 0 0 0 0 0 0 0 0                                                     | 0 1 0 0 0 0 0 0 0 1 0 0 0 0 0 0 0 0 0 0 0 0 0 0 0 0 |
| act | 0 0 5 2 0 3 0 0                                                     | 2 0 2 1 1 2 0 2 0 0 4 1 5 3 0 1 0 0 3 0 0 1 1 1 2   |
| eri | 1 3 0 0 6 0 1 5 0 8 2 3 9 5 1 3 0 2 1 0 0 7 4 4 0 4 3 6 5 2 7 6 5 3 |                                                     |







```

ter
ia|
c__
Del
tap
rot
eob
act
eri
a|o
__D
esu
lfo
vib
rio
nal
es|
f__
Des
ulf
ovi
bri
ona
cea
e|g
__D
esu
lfo
vib
rio
|s_
_De
sul
fov
ibr
io_
sp.
_AB
HU1
SB
d__ 0 0 0 0 0 0 0 0    0 0 0 0 0 0 0 0 0 1 0 0 0 0 0 0 0 0 0 0 0 0 0 0
Bac  . . . . . . . . . . . . . . . . . . . . . . . . . . . . . .
ter 0 0 5 2 0 2 0 0    2 9 2 1 1 2 0 2 0 0 4 1 5 3 0 1 0 0 3 0 0 1 1 1 2
ia| 1 3 0 0 6 9 1 3 0 6 5 3 9 5 1 3 0 2 0 0 0 7 4 4 0 4 3 6 5 2 7 6 5 2

```

p\_\_  
Pro  
teo  
bac  
ter  
ial  
c\_\_  
Del  
tap  
rot  
eob  
act  
eri  
alo  
\_\_D  
esu  
lfo  
vib  
rio  
nal  
es|  
f\_\_  
Des  
ulf  
ovi  
bri  
ona  
cea  
elg  
\_\_D  
esu  
lfo  
vib  
rio  
|s\_  
\_De  
sul  
fov  
ibr  
io\_  
sp.  
\_AB  
HU1  
SBf

```

atS
d__
Bac
ter
ia|
p__
Pro
teo
bac
ter
ia|
c__
Del
tap
rot
eob
act
eri
a|o
__D
esu
lfo
vib
rio
nal
es|
f__
Des
ulf
ovi
bri
ona
cea
e|g
__D
esu
lfo
vib
rio
|s_
_un          0  0  0  0          0          0
cul          .  .  .  .          .          .
tur          0  0  0  0          0          0
ed_ 0 0 0 0 0 1 0 1 0 1 4 0 0 0 0 0 0 0 0 0 0 1 0 0 0 0 0 0 1 0 0 0 0 0 0 0 0 0 0 0

```



Des  
 ulf  
 ovi  
 bri  
 o\_s  
 p.  
 d\_\_  
 Bac  
 ter  
 ia|  
 p\_\_  
 Pro  
 teo  
 bac  
 ter  
 ia|  
 c\_\_  
 Gam  
 map  
 rot  
 eob 1 1 0 1 1 1 0 1 1 2 1 1 1 1 0 1 0 3 0 3 2 0 6 1 7 0 4 0 0 0 5 0 1 0  
 act . . . . .  
 eri 3 2 7 6 4 2 8 0 6 3 2 4 7 5 4 5 8 1 9 8 0 3 0 6 7 3 4 2 5 5 1 4 8 6  
 a 8 1 1 5 3 4 6 4 4 2 3 7 1 3 2 9 9 5 9 9 3 2 7 3 3 5 4 9 5 7 3 8 5 5  
 d\_\_  
 Bac  
 ter  
 ia|  
 p\_\_  
 Pro  
 teo  
 bac  
 ter  
 ia|  
 c\_\_  
 Gam  
 map  
 rot  
 eob  
 act  
 eri 0 0  
 a|o . .  
 \_\_A 0 0  
 ero 0 0 0 0 0 0 0 0 0 0 0 0 0 0 0 0 0 2 0 0 0 0 0 0 0 0 0 0 0 0 0 0 0 0 0 0







|f\_  
\_Ae  
rom  
ona  
dac  
eae  
|g\_  
\_Ae  
rom  
ona  
s|s  
\_A  
ero  
mon  
as\_  
sp.  
\_VK  
M\_B  
-  
226  
1  
d\_  
Bac  
ter  
ia|  
p\_  
Pro  
teo  
bac  
ter  
ia|  
c\_  
Gam  
map  
rot  
eob  
act  
eri  
a|o  
\_B

|     |   |   |   |   |   |   |   |   |   |   |   |   |   |   |   |   |   |   |   |   |   |   |   |   |   |   |   |   |   |   |   |   |   |   |   |   |   |   |   |   |
|-----|---|---|---|---|---|---|---|---|---|---|---|---|---|---|---|---|---|---|---|---|---|---|---|---|---|---|---|---|---|---|---|---|---|---|---|---|---|---|---|---|
| urk | 0 | 0 | 0 | 1 | 0 | 0 | 0 | 0 | 1 | 0 | 0 | 0 | 1 | 0 | 0 | 1 | 0 | 2 | 0 | 1 | 1 | 0 | 0 | 1 | 0 | 0 | 0 | 0 | 0 | 0 | 0 | 0 | 0 | 0 | 0 | 0 | 0 | 0 |   |   |
| hol | . | . | . | . | . | . | . | . | . | . | . | . | . | . | . | . | . | . | . | . | . | . | . | . | . | . | . | . | . | . | . | . | . | . | . | . | . | . | . | . |
| der | 8 | 7 | 2 | 0 | 4 | 8 | 4 | 5 | 2 | 3 | 0 | 4 | 2 | 2 | 1 | 2 | 6 | 9 | 4 | 8 | 5 | 0 | 0 | 0 | 0 | 1 | 2 | 0 | 1 | 1 | 1 | 1 | 0 | 1 |   |   |   |   |   |   |
| ial | 2 | 0 | 1 | 9 | 3 | 6 | 1 | 9 | 0 | 6 | 7 | 1 | 2 | 6 | 8 | 4 | 9 | 0 | 0 | 4 | 3 | 6 | 8 | 6 | 5 | 1 | 3 | 0 | 0 | 3 | 6 | 9 | 6 | 8 |   |   |   |   |   |   |





```

der
ial
es|
f__
Alc
ali
gen
ace
ae|
g__
Ach
rom
oba
cte
r|s
__A
chr
omo
bac
ter
_un
cla
ssi
fie
d
d__
Bac
ter
ial
p__
Pro
teo
bac
ter
ial
c__
Gam
map
rot
eob
act     0     0  0    0 0     0      0
eri     .     .  .    . .     .      .
a|o    0     0  0    0 0     0      0
__B    0 0 1 0 0 0 1 0 4 0 0 7 2 0 0 0 0 0 0 0 0 0 0 0 0 0 0 0 0 0 0 0 0 0 0 0 0 7

```



urk  
hol  
der  
ial  
es|  
f\_\_  
Alc  
ali  
gen  
ace  
ae|  
g\_\_  
Pae  
nal  
cal  
ige  
nes  
d\_\_

Bac  
ter  
ial|  
p\_\_  
Pro  
teo  
bac  
ter  
ial|  
c\_\_

Gam  
map  
rot  
eob  
act  
eri  
a|o  
\_\_B  
urk  
hol  
der  
ial  
es| 0 0 0 0 0 0 0  
f\_\_ . . . . . .  
Alc 0 0 0 0 0 0 0  
ali 0 0 1 0 0 0 1 0 4 0 0 7 2 0 0 0 0 0 0 0 0 0 0 0 0 0 0 0 0 0 0 0 0 0 0 0 0 0 7









```

eri
a
d__
Bac
ter
ial
p__
Pro
teo
bac
ter
ial
c__
Gam
map
rot
eob
act
eri
a|o
__B
urk
hol
der
ial
es|
f__
Bur
kho
lde
ria
cea
e|g
__B
urk
hol
der
ia-
Cab
all
ero    0  0 0  0 0  0  0  0 0 0 0  0 0  0 0  0 0 0 0
nia    .  . .  . .  .  . . . .  . .  . .  . .  . . .
-      0  0 2  0 0  0  1  0 0 0 0  0 0  0 0  1  0 0  0 0 0
Par 0 8 0 2 2 0 7 2 0 8 0 0 3 0 4 2 1 6 0 0 2 2 0 7 1 0 7 0 4 4 0 6 2 1

```

abu

rkh

old

eri

a|s

\_\_B

urk

hol

der

ia-

Cab

all

ero

nia

-

Par

abu

rkh

old

eri

a\_u

ncl

ass

ifi

ed

d\_\_

Bac

ter

ia|

p\_\_

Pro

teo

bac

ter

ia|

c\_\_

Gam

map

rot

eob

act

eri

a|o

\_\_B

0 0 0 0 0 0 0 0 0 0 0 0 0 0 0 0 0 0 0 0 0 0 0 0 0 0 0 0 0 0





```

lde
ria
cea
elg
__C
upr
iav
idu
s|s
__C
upr
iav
idu
s_u
ncl
ass
ifi
ed
d__
Bac
ter
ial
p__
Pro
teo
bac
ter
ial
c__
Gam
map
rot
eob
act
eri
a|o
__B
urk
hol
der
ial      0 0      0      0 0      0      0      0      0 0      0
es|      . .      .      . .      .      .      .      . .      .
f__      0 0      0      0 0      0      0      0      0 0      0
Bur 0 0 0 1 2 0 0 2 0 0 0 1 2 0 0 1 0 0 1 0 0 2 0 0 0 0 1 0 0 2 0 0 0 0

```

```

kho
lde
ria
cea
elg
__R
als
ton
ia
d__
Bac
ter
ia|
p__
Pro
teo
bac
ter
ia|
c__
Gam
map
rot
eob
act
eri
a|o
__B
urk
hol
der
ial
es|
f__
Bur
kho
lde
ria
cea
elg
__R      0 0      0      0 0      0      0      0      0 0      0
als      . .      .      . .      .      .      .      . .      .
ton      0 0      0      0 0      0      0      0      0 0      0
ia| 0 0 0 1 2 0 0 2 0 0 0 1 2 0 0 1 0 0 1 0 0 2 0 0 0 0 1 0 0 2 0 0 0 0

```

s\_\_  
Ral  
sto  
nia  
\_un  
cla  
ssi  
fie  
d  
d\_\_  
Bac  
ter  
ia|  
p\_\_  
Pro  
teo  
bac  
ter  
ia|  
c\_\_  
Gam  
map  
rot  
eob  
act  
eri  
a|o  
\_\_B  
urk  
hol  
der  
ial  
es|  
f\_\_  
Com

|     |         |         |         |             |         |         |         |         |         |             |
|-----|---------|---------|---------|-------------|---------|---------|---------|---------|---------|-------------|
| amo | 0 0     | 0       |         | 0 0 0 0 0 0 |         | 0 0 0   |         | 0 0 0 0 | 0 0     | 0 0 0 0 0 0 |
| nad | . .     | .       |         | . . . . .   |         | . . .   |         | . . . . | . .     | . . . . .   |
| ace | 0 0     | 0       |         | 0 0 1 0 0 0 |         | 0 0 0   |         | 0 0 0 0 | 0 0     | 0 0 0 0 0 0 |
| ae  | 8 1 0 8 | 0 0 0 8 | 1 1 1 1 | 6 0 0 5     | 2 5 0 0 | 0 0 5   | 1 7 1 0 | 5 0 0   | 7 2 9   | 1 1 8       |
| d__ |         |         |         |             |         |         |         |         |         |             |
| Bac | 0 0     | 0       |         | 0 0 0       | 0       | 0 0     |         | 0 0 0   | 0       | 0 0 0 0 0 0 |
| ter | . .     | .       |         | . . .       | .       | . .     |         | . . .   | .       | . . . . .   |
| ia  | 0 0     | 0       |         | 0 0 0       | 0       | 0 0     |         | 0 0 0   | 0       | 0 0 0 0 0 0 |
| p__ | 7 1 0 6 | 0 0 0 0 | 0 9 1 0 | 4 0 0 0     | 0 2 5 0 | 0 0 0 0 | 0 1 7 1 | 0 4 0 0 | 0 1 1 7 | 1 1 6       |

Pro  
teo  
bac  
ter  
ial  
c\_\_  
Gam  
map  
rot  
eob  
act  
eri  
a|o  
\_\_B  
urk  
hol  
der  
ial  
es|  
f\_\_  
Com  
amo  
nad  
ace  
ae|  
g\_\_  
Com  
amo  
nas  
d\_\_  
Bac  
ter  
ial  
p\_\_  
Pro  
teo  
bac  
ter  
ial  
c\_\_

|     |   |   |   |   |   |   |   |   |   |   |   |   |   |   |   |   |   |   |   |   |   |   |   |   |   |   |   |   |   |   |   |   |   |   |   |   |
|-----|---|---|---|---|---|---|---|---|---|---|---|---|---|---|---|---|---|---|---|---|---|---|---|---|---|---|---|---|---|---|---|---|---|---|---|---|
| Gam | 0 | 0 | 0 |   | 0 | 0 | 0 | 0 |   | 0 | 0 |   | 0 | 0 | 0 | 0 | 0 | 0 | 0 | 0 | 0 | 0 | 0 | 0 | 0 | 0 | 0 |   |   |   |   |   |   |   |   |   |
| map | . | . | . |   | . | . | . | . |   | . | . |   | . | . | . | . | . | . | . | . | . | . | . | . | . | . | . | . |   |   |   |   |   |   |   |   |
| rot | 0 | 0 | 0 |   | 0 | 0 | 0 | 0 |   | 0 | 0 |   | 0 | 0 | 0 | 0 | 0 | 0 | 0 | 0 | 0 | 0 | 0 | 0 | 0 | 0 | 0 |   |   |   |   |   |   |   |   |   |
| eob | 7 | 1 | 0 | 6 | 0 | 0 | 0 | 0 | 0 | 9 | 1 | 0 | 4 | 0 | 0 | 0 | 2 | 5 | 0 | 0 | 0 | 0 | 0 | 1 | 7 | 1 | 0 | 4 | 0 | 0 | 1 | 1 | 7 | 1 | 1 | 6 |





Com  
 amo  
 nad  
 ace  
 ae|  
 g\_\_  
 Cur  
 vib  
 act  
 er|  
 s\_\_  
 Cur  
 vib  
 act  
 er\_  
 unc  
 las  
 sif  
 ied  
 d\_\_  
 Bac  
 ter  
 ial  
 p\_\_  
 Pro  
 teo  
 bac  
 ter  
 ial  
 c\_\_  
 Gam  
 map  
 rot  
 eob  
 act  
 eri  
 a|o  
 \_\_B  
 urk  
 hol  
 der 0 0 0 0 0 0 0 0 0 0 0 0  
 ial . . . . . . . . . . . .  
 es| 0 0 0 0 0 0 0 0 0 0 0 0 0  
 f\_\_ 1 0 0 2 0 0 8 0 1 0 0 2 0 0 5 0 0 0 0 0 5 0 0 0 0 2 0 0 6 0 2 0 0 1

Com  
 amo  
 nad  
 ace  
 ae|  
 g\_\_  
 Del  
 fti  
 a  
 d\_\_  
 Bac  
 ter  
 ia|  
 p\_\_  
 Pro  
 teo  
 bac  
 ter  
 ia|  
 c\_\_  
 Gam  
 map  
 rot  
 eob  
 act  
 eri  
 alo  
 \_\_B  
 urk  
 hol  
 der  
 ial  
 es|  
 f\_\_  
 Com  
 amo  
 nad  
 ace  
 ae|  
 g\_\_  
 Del  
 fti  
 a|s  
 \_\_D

|   |   |   |   |   |   |   |   |   |   |   |   |   |   |   |   |   |   |   |   |   |   |   |   |   |   |   |   |   |   |   |   |   |   |   |
|---|---|---|---|---|---|---|---|---|---|---|---|---|---|---|---|---|---|---|---|---|---|---|---|---|---|---|---|---|---|---|---|---|---|---|
| 0 | 0 | 0 | 0 | 0 | 0 | 0 | 0 | 0 | 0 | 0 | 0 | 0 | 0 |   |   |   |   |   |   |   |   |   |   |   |   |   |   |   |   |   |   |   |   |   |
| . | . | . | . | . | . | . | . | . | . | . | . | . | . |   |   |   |   |   |   |   |   |   |   |   |   |   |   |   |   |   |   |   |   |   |
| 0 | 0 | 0 | 0 | 0 | 0 | 0 | 0 | 0 | 0 | 0 | 0 | 0 | 0 |   |   |   |   |   |   |   |   |   |   |   |   |   |   |   |   |   |   |   |   |   |
| 1 | 0 | 0 | 2 | 0 | 0 | 8 | 0 | 1 | 0 | 0 | 2 | 0 | 0 | 5 | 0 | 0 | 0 | 0 | 0 | 0 | 5 | 0 | 0 | 0 | 0 | 2 | 0 | 0 | 6 | 0 | 2 | 0 | 0 | 1 |





Bac  
ter  
ial  
p\_\_  
Pro  
teo  
bac  
ter  
ial  
c\_\_  
Gam  
map  
rot  
eob  
act  
eri  
alo  
\_\_B  
urk  
hol  
der  
ial  
es|  
f\_\_  
Com  
amo  
nad  
ace  
ae|  
g\_\_  
Dia  
pho  
rob  
act  
er|  
s\_\_  
Dia  
pho  
rob  
act  
er\_  
unc  
las  
sif









\_\_B  
urk  
hol  
der  
ial  
es|  
f\_\_  
Com  
amo  
nad  
ace  
ae|  
g\_\_  
Var  
iov  
ora  
x  
d\_\_  
Bac  
ter  
ia|  
p\_\_  
Pro  
teo  
bac  
ter  
ia|  
c\_\_  
Gam  
map  
rot  
eob  
act  
eri  
a|o  
\_\_B  
urk  
hol  
der  
ial  
es| 0  
f\_\_ .  
Com 0  
amo 0 0 0 0 0 0 0 0 0 0 0 1 0 0 0 0 0 0 0 0 0 0 0 0 0 0 0 0 0 0 0 0 0 0 0 0 0

nad  
ace  
ae|  
g\_\_  
Var  
iov  
ora  
x|s  
\_\_v  
ari  
ovo  
rax  
\_un  
cla  
ssi  
fie  
d  
d\_\_  
Bac  
ter  
ia|  
p\_\_  
Pro  
teo  
bac  
ter  
ia|  
c\_\_  
Gam  
map  
rot  
eob  
act  
eri  
a|o  
\_\_B  
urk  
hol  
der  
ial  
es|                   0  
f\_\_                   .  
Hyd                   0  
rog 0 0 0 0 0 0 0 0 1 0 0 0 0 0 0 0 0 0 0 0 0 0 0 0 0 0 0 0 0 0 0 0 0 0 0 0



eno  
 phi  
 lac  
 eae  
 d\_\_  
 Bac  
 ter  
 ia|  
 p\_\_  
 Pro  
 teo  
 bac  
 ter  
 ia|  
 c\_\_  
 Gam  
 map  
 rot  
 eob  
 act  
 eri  
 alo  
 \_\_B  
 urk  
 hol  
 der  
 ial  
 es|  
 f\_\_  
 Hyd  
 rog  
 eno  
 phi  
 lac  
 eae  
 lg\_  
 \_Hy  
 dro  
 gen

0  
 .  
 0  
 0 0 0 0 0 0 1 0 0 0 0 0 0 0 0 0 0 0 0 0 0 0 0 0 0 0 0 0 0 0  
 0  
 0 0 0 0 0 0 0 . 0 0 0 0 0 0 0 0 0 0 0 0 0 0 0 0 0 0 0 0 0 0 0 0

|      |   |
|------|---|
| ter  | 0 |
| ial  | 1 |
| p__  |   |
| Pro  |   |
| teo  |   |
| bac  |   |
| ter  |   |
| ial  |   |
| c__  |   |
| Gam  |   |
| map  |   |
| rot  |   |
| eob  |   |
| act  |   |
| eri  |   |
| a o  |   |
| __B  |   |
| urk  |   |
| hol  |   |
| der  |   |
| ial  |   |
| es   |   |
| f__  |   |
| Hyd  |   |
| rog  |   |
| eno  |   |
| phi  |   |
| lac  |   |
| eae  |   |
| lg_  |   |
| __Hy |   |
| dro  |   |
| gen  |   |
| oph  |   |
| ilu  |   |
| s s  |   |
| __H  |   |
| ydr  |   |
| oge  |   |
| nop  |   |
| hil  |   |
| us_  |   |
| unc  |   |
| las  |   |







```

hol
der
ial
es|
f__
Oxa
lob
act
era
cea
e
d__
Bac
ter
ial|
p__
Pro
teo
bac
ter
ial|
c__
Gam
map
rot
eob
act
eri
alo
__B
urk
hol
der
ial
es|
f__
Oxa
lob
act
era
cea      0          0          0
elg      .          .          .
__M      0          0          0
ass  0 0 0 0 4 0 0 0 0 0 0 0 0 2 0 0 0 0 0 0 0 0 0 0 0 0 0 0 0 0 2 0 0 0 0 0 0 0

```

```
ili
a
d__
Bac
ter
ial
p__
Pro
teo
bac
ter
ial
c__
Gam
map
rot
eob
act
eri
al|o
__B
urk
hol
der
ial
es|
f__
Oxa
lob
act
era
cea
e|g
__M
ass
ili
al|s
__M
ass
ili
a_u          0          0          0
ncl          .          .          .
ass          0          0          0
ifi 0 0 0 0 4 0 0 0 0 0 0 0 2 0 0 0 0 0 0 0 0 0 2 0 0 0 0 0
```







Pro  
teo  
bac  
ter  
ia|  
c\_\_  
Gam  
map  
rot  
eob  
act  
eri  
a|o  
\_\_B  
urk  
hol  
der  
ial  
es|  
f\_\_  
Sut  
ter  
ell  
ace  
ae  
d\_\_  
Bac  
ter  
ia|  
p\_\_  
Pro  
teo  
bac  
ter  
ia|  
c\_\_  
Gam  
map  
rot  
eob  
act  
eri  
a|o  
\_\_B

0 0 0 0 0 0 0 0 1 0 0 0 1 0 0 1 0 2 0 1 1 0 0 0 0 0 0 0 0 0 0 0 0 0 0 0 0 0 0  
.  
7 6 2 9 1 8 2 5 0 2 0 2 0 2 0 1 6 8 3 8 4 0 0 9 0 0 0 0 0 0 0 0 0 0 0 0 0 0  
4 1 1 9 5 6 5 2 5 7 7 6 4 6 9 9 3 4 9 4 6 2 1 9 4 5 3 0 0 5 7 1 4 2

urk  
hol  
der  
ial  
es|  
f\_\_  
Sut  
ter  
ell  
ace  
ae|  
g\_\_  
Par  
asu  
tte  
rel  
la  
d\_\_  
Bac  
ter  
ia|  
p\_\_  
Pro  
teo  
bac  
ter  
ia|  
c\_\_  
Gam  
map  
rot  
eob  
act  
eri  
a|o  
\_\_B  
urk  
hol  
der  
ial

es| 0 0 0 0 0 0 0 0 1 0 0 0 1 0 0 1 0 2 0 1 1 0 0 0 0 0 0 0 0 0 0 0 0 0 0 0 0  
f\_\_ . . . . . . . . . . . . . . . . . . . . . . . . . . . . . . . . . . . . . . .  
Sut 7 6 2 9 1 8 2 5 0 2 0 2 0 2 0 1 6 8 3 8 4 0 0 9 0 0 0 0 0 0 0 0 0 0 0 0 0  
ter 4 1 1 9 5 6 5 2 5 7 7 6 4 6 9 9 3 4 9 4 6 2 1 9 4 5 3 0 0 5 7 1 4 2







act  
eri  
a|o  
\_\_C  
omp  
eti  
bac  
ter  
ale  
s|f  
\_\_C  
omp  
eti  
bac  
ter  
ace  
ae|  
g\_\_  
Can  
did  
atu  
s\_C  
omp  
eti  
bac  
ter  
|s\_  
\_Ca  
ndi  
dat  
us\_  
Com  
pet  
iba  
cte  
r\_u  
ncl  
ass  
ifi  
ed

|     |   |   |   |   |   |   |   |   |   |   |   |   |   |   |   |   |   |   |   |   |   |   |   |   |   |   |   |   |   |   |   |   |   |   |   |   |
|-----|---|---|---|---|---|---|---|---|---|---|---|---|---|---|---|---|---|---|---|---|---|---|---|---|---|---|---|---|---|---|---|---|---|---|---|---|
| d__ | 0 | 0 | 0 | 0 | 0 | 0 | 0 | 0 | 0 | 1 | 1 | 0 | 0 | 1 | 0 | 0 | 0 | 0 | 0 | 0 | 0 | 0 | 5 | 0 | 7 | 0 | 4 | 0 | 0 | 0 | 4 | 0 | 1 | 0 |   |   |
| Bac | . | . | . | . | . | . | . | . | . | . | . | . | . | . | . | . | . | . | . | . | . | . | . | . | . | . | . | . | . | . | . | . | . | . | . | . |
| ter | 5 | 4 | 4 | 5 | 8 | 3 | 3 | 3 | 3 | 8 | 1 | 9 | 3 | 2 | 1 | 2 | 1 | 2 | 5 | 1 | 3 | 1 | 9 | 4 | 6 | 1 | 0 | 2 | 3 | 3 | 9 | 2 | 7 | 3 |   |   |
| ia  | 2 | 7 | 6 | 1 | 1 | 2 | 8 | 3 | 7 | 7 | 0 | 8 | 3 | 1 | 8 | 5 | 5 | 1 | 4 | 0 | 9 | 5 | 2 | 8 | 0 | 4 | 0 | 2 | 7 | 7 | 2 | 1 | 0 | 5 |   |   |



























ia |

c\_\_

Gam

map

rot

eob

act

eri

alo

\_\_E

nre

rob

act

era

les

|f\_

\_En

ter

oba

cte

ria

cea

e|g

\_\_C

itr

oba

cte

r|s

\_\_C

itr

oba

cte

r\_k

ose

ri

d\_\_

Bac

ter

ia |

p\_\_

Pro

0

teo

.

bac

0

ter

0 0 0 0 0 0 0 0 0 0 0 0 0 0 0 0 2 0 0 0 0 0 0 0 0 0 0 0 0 0 0 0 0 0 0 0 0 0 0

ia|  
 c\_\_  
 Gam  
 map  
 rot  
 eob  
 act  
 eri  
 a|o  
 \_\_E  
 nte  
 rob  
 act  
 era  
 les  
 |f\_  
 \_En  
 ter  
 oba  
 cte  
 ria  
 cea  
 e|g  
 \_\_E  
 nte  
 rob  
 act  
 er  
 d\_\_  
 Bac  
 ter  
 ia|  
 p\_\_  
 Pro  
 teo  
 bac  
 ter  
 ia|  
 c\_\_  
 Gam  
 map  
 rot  
 eob  
 act    0 0 0 0 0 0 0 0 0 0 0 0 0 0 0 2 0 0 0 0 0 0 0 0 0 0 0 0 0 0 0 0 0 0 0 0 0 0

```

eri
alo
__E
nte
rob
act
era
les
|f_
_En
ter
oba
cte
ria
cea
e|g
__E
nte
rob
act
er|
s__
Ent
ero
bac
ter
_sp
._N
J-
64
d__
Bac
ter
ia|
p__
Pro
teo
bac
ter
ia|
c__ 0 0 0 0 0 0 0 0 0 1 1 0 0 1 0 0 0 0 0 0 0 0 5 0 7 0 3 0 0 0 4 0 1 0
Gam . . . . .
map 2 2 3 2 5 2 3 2 3 8 0 9 1 1 1 1 1 1 0 1 1 9 4 5 1 8 1 3 3 8 1 6 2
rot 7 5 1 6 5 7 1 7 2 1 6 0 3 4 0 6 1 3 5 9 1 3 2 7 9 3 2 6 2 2 9 7 4 9

```

eob  
act  
eri  
a|o  
\_\_E  
nte  
rob  
act  
era  
les  
|f\_  
\_En  
ter  
oba  
cte  
ria  
cea  
e|g  
\_\_E  
sch  
eri  
chi  
a-  
Shi  
gel  
la  
d\_\_  
Bac  
ter  
ia|  
p\_\_  
Pro  
teo  
bac  
ter  
ia|  
c\_\_  
Gam  
map  
rot

|     |   |   |   |   |   |   |   |   |   |   |   |   |   |   |   |   |   |   |   |   |   |   |   |   |   |   |   |   |   |   |   |   |   |   |   |   |   |
|-----|---|---|---|---|---|---|---|---|---|---|---|---|---|---|---|---|---|---|---|---|---|---|---|---|---|---|---|---|---|---|---|---|---|---|---|---|---|
| eob | 0 | 0 | 0 | 0 | 0 | 0 | 0 | 0 | 0 | 1 | 1 | 0 | 0 | 1 | 0 | 0 | 0 | 0 | 0 | 0 | 0 | 0 | 5 | 0 | 7 | 0 | 3 | 0 | 0 | 0 | 4 | 0 | 1 | 0 |   |   |   |
| act | . | . | . | . | . | . | . | . | . | . | . | . | . | . | . | . | . | . | . | . | . | . | . | . | . | . | . | . | . | . | . | . | . | . | . | . | . |
| eri | 2 | 2 | 3 | 2 | 5 | 2 | 3 | 2 | 3 | 8 | 0 | 9 | 1 | 1 | 1 | 1 | 1 | 1 | 1 | 0 | 1 | 1 | 9 | 4 | 5 | 1 | 8 | 1 | 3 | 3 | 8 | 1 | 6 | 2 |   |   |   |
| a o | 7 | 5 | 1 | 6 | 5 | 7 | 1 | 7 | 2 | 1 | 6 | 0 | 3 | 4 | 0 | 6 | 1 | 3 | 5 | 9 | 1 | 3 | 2 | 7 | 9 | 3 | 2 | 6 | 2 | 2 | 9 | 7 | 4 | 9 |   |   |   |

\_\_E

n

r

a

e

r

|f\_

\_En

t

o

c

r

c

e

|g

\_\_E

s

e

r

a-

S

h

|a|

s\_\_

E

h

h

ia-

S

h

|a\_

u

l

s

i

h

d\_\_

B

t

h

\_\_P

r

o

o

o

o

o

o

o

o

o

|   |   |   |   |   |   |   |   |   |   |   |   |   |   |   |   |   |   |   |   |   |   |   |   |
|---|---|---|---|---|---|---|---|---|---|---|---|---|---|---|---|---|---|---|---|---|---|---|---|
| 0 | 0 | 0 | 0 | 0 | 0 | 0 | 0 | 0 | 0 | 0 | 0 | 0 | 0 | 0 | 0 | 0 | 0 | 0 | 0 | 0 | 0 | 0 |   |
| . | . | . | . | . | . | . | . | . | . | . | . | . | . | . | . | . | . | . | . | . | . | . | . |
| 0 | 0 | 0 | 0 | 0 | 0 | 0 | 0 | 0 | 0 | 2 | 0 | 2 | 0 | 0 | 0 | 0 | 1 | 0 | 0 | 0 | 0 | 0 |   |

1 2 0 3 0 1 0 0 0 0 0 1 3 0 2 0 0 2 0 1 8 0 0 0 0 0 0 0 7 4 5 3 4 6 5







```

__E
nte
rob
act
era
les
|f_
_En
ter
oba
cte
ria
cea
elg
__K
leb
sie
lla
|s_
_Kl
ebs
iel
la_
pne
umo
nia
e
d__
Bac
ter
ia|
p__
Pro
teo
bac
ter
ia|
c__
Gam
map
rot           0           0 0  0
eob           .           . .  .
act           0           0 1  2
eri 0 0 0 0 0 0 0 0 0 0 0 0 0 1 0 0 0 0 0 2 4 0 8 0 0 0 0 0 0 0 0 0 0 0 0 0 0 0 0

```

```

a|o
__E
nte
rob
act
era
les
|f_
__En
ter
oba
cte
ria
cea
e|g
__K
leb
sie
lla
|s_
__un
cul
tur
ed_
Kle
bsi
ell
a_s
p.
d__
Bac
ter
ia|
p__
Pro
teo
bac
ter
ia|
c__
Gam          0          0          0    0          0
map          .          .          .    .          .
rot          1          0          0    0          0
eob 0 0 0 0 1 0 0 0 0 0 0 0 8 0 0 0 0 0 3 0 0 1 0 0 0 0 8 0 0 0 0 0 0 0

```

```

act
eri
a|o
__E
nte
rob
act
era
les
|f_
_Er
win
iac
eae
d__
Bac
ter
ia|
p__
Pro
teo
bac
ter
ia|
c__
Gam
map
rot
eob
act
eri
a|o
__E
nte
rob
act
era
les
|f_
_Er
win      0      0      0      0      0
iac      .      .      .      .      .
eae      1      0      0      0      0
|g_ 0 0 0 0 1 0 0 0 0 0 0 0 8 0 0 0 0 0 3 0 0 1 0 0 0 0 8 0 0 0 0 0 0 0

```

```

_Pa
nto
ea
d__
Bac
ter
ial
p__
Pro
teo
bac
ter
ial
c__
Gam
map
rot
eob
act
eri
alo
__E
nte
rob
act
era
les
|f_
_Er
win
iac
eae
|g_
_Pa
nto
ea|
s__
Pan
toe
a_a
ggl      0      0      0      0      0
ome      .      .      .      .      .
ran      0      0      0      0      0
s 0 0 0 0 7 0 0 0 0 0 0 0 4 0 0 0 0 0 3 0 0 1 0 0 0 0 5 0 0 0 0 0 0 0

```

d\_\_  
Bac  
ter  
ia|  
p\_\_  
Pro  
teo  
bac  
ter  
ia|  
c\_\_  
Gam  
map  
rot  
eob  
act  
eri  
a|o  
\_\_E  
nte  
rob  
act  
era  
les  
|f\_  
\_\_Er  
win  
iac  
eae  
|g\_  
\_\_Pa  
nto  
ea|  
s\_\_  
Pan           0                      0                                        0  
toe           .                      .                                        .  
a\_s           0                      0                                        0  
p.   0 0 0 0 5 0 0 0 0 0 0 0 0 0 4 0 0 0 0 0 0 0 0 0 0 0 0 0 0 0 0 0 0 0 0 0 3 0 0 0 0 0 0 0 0 0  
d\_\_  
Bac  
ter           0                                      0           0  
ia|           .                                      .           .  
p\_\_           0                                      0           1  
Pro   0 0 0 0 0 0 0 0 0 0 0 0 0 0 0 0 0 0 0 0 1 0 0 0 0 0 0 0 0 0 0 0 0 0 0 0 0 0 0 0 0 0







lg\_  
\_Pr  
ote  
us|  
s\_\_  
Pro  
teu  
s\_m  
ira  
bil  
is  
d\_\_  
Bac  
ter  
ia|  
p\_\_  
Pro  
teo  
bac  
ter  
ia|  
c\_\_  
Gam  
map  
rot  
eob  
act  
eri  
alo  
\_\_E  
nte  
rob  
act  
era  
les  
|f\_  
\_Mo  
rga  
nel  
lac  
eae  
lg\_  
\_Pr  
ote

0 0 0 0 0 0 0 0 0 0 0 0 0 0 0 0 0 0 0 0 0 0  
0 6 0 0 0 0 0 0 0 0 0 0 0 0 0 0 0 0 0 0 0 0  
.  
0  
0



|     |   |
|-----|---|
| Bac | . |
| ter | 0 |
| ia  | 0 |
| p__ |   |
| Pro |   |
| teo |   |
| bac |   |
| ter |   |
| ia  |   |
| c__ |   |
| Gam |   |
| map |   |
| rot |   |
| eob |   |
| act |   |
| eri |   |
| a o |   |
| __E |   |
| nre |   |
| rob |   |
| act |   |
| era |   |
| les |   |
| f_  |   |
| _Mo |   |
| rga |   |
| nel |   |
| lac |   |
| eae |   |
| lg_ |   |
| _Pr |   |
| ovi |   |
| den |   |
| cia |   |
| s_  |   |
| _Pr |   |
| ovi |   |
| den |   |
| cia |   |
| _al |   |
| cal |   |
| ifa |   |
| cie |   |
| ns  |   |





















|     |   |   |
|-----|---|---|
| Bac | . | . |
| ter | 0 | 0 |
| ia  | 0 | 1 |
| p__ |   |   |
| Pro |   |   |
| teo |   |   |
| bac |   |   |
| ter |   |   |
| ia  |   |   |
| c__ |   |   |
| Gam |   |   |
| map |   |   |
| rot |   |   |
| eob |   |   |
| act |   |   |
| eri |   |   |
| a o |   |   |
| __E |   |   |
| nre |   |   |
| rob |   |   |
| act |   |   |
| era |   |   |
| les |   |   |
| f_  |   |   |
| _Ps |   |   |
| eud |   |   |
| oal |   |   |
| ter |   |   |
| omo |   |   |
| nad |   |   |
| ace |   |   |
| ae  |   |   |
| g__ |   |   |
| Pse |   |   |
| udo |   |   |
| alt |   |   |
| ero |   |   |
| mon |   |   |
| as  |   |   |
| s__ |   |   |
| Pse |   |   |
| udo |   |   |
| alt |   |   |
| ero |   |   |

```

mon
as_
unc
las
sif
ied
d__
Bac
ter
ia|
p__
Pro
teo
bac
ter
ia|
c__
Gam
map
rot
eob
act
eri
a|o
__E
nte
rob
act
era
les
|f_
_Sh
ewa 0 0 0 0 0 0 0 0 0 0 0 0 0 0
nel . . . . . . . . . . . .
lac 0 0 0 0 0 0 0 0 0 0 0 0 0 0
eae 2 1 2 1 4 0 2 1 1 2 0 1 1 1 0 1 0 1 0 0 0 0 0 0 0 0 0 0 0 0 0 0
d__
Bac
ter
ia|
p__ 0 0 0 0 0 0 0 0 0 0 0 0 0 0
Pro . . . . . . . . . . . .
teo 0 0 0 0 0 0 0 0 0 0 0 0 0 0
bac 2 1 2 1 4 0 2 1 1 2 0 1 1 1 0 1 0 1 0 0 0 0 0 0 0 0 0 0 0 0 0 0

```

ter  
 ia|  
 c\_\_  
 Gam  
 map  
 rot  
 eob  
 act  
 eri  
 a|o  
 \_\_E  
 nte  
 rob  
 act  
 era  
 les  
 |f\_  
 \_Sh  
 ewa  
 nel  
 lac  
 eae  
 |g\_  
 \_Sh  
 ewa  
 nel  
 la  
 d\_\_  
 Bac  
 ter  
 ia|  
 p\_\_  
 Pro  
 teo  
 bac  
 ter  
 ia|  
 c\_\_  
 Gam  
 map  
 rot  
 eob  
 act  
 eri

0 0 0 0 0 0 0 0 0 0 0 0 0  
 . . . . . . . . . .  
 0 0 0 0 0 0 0 0 0 0 0 0 0  
 2 1 2 1 4 0 2 1 1 2 0 1 1 1 0 1 0 1 0 0 0 0 0 0 0 0 0 0 0 0 0

a|o  
\_E  
nte  
rob  
act  
era  
les  
|f\_  
\_Sh  
ewa  
nel  
lac  
eae  
|g\_  
\_Sh  
ewa  
nel  
la|  
s\_\_  
She  
wan  
ell  
a\_u  
ncl  
ass  
ifi  
ed  
d\_\_  
Bac  
ter  
ia|  
p\_\_  
Pro  
teo  
bac  
ter  
ia|  
c\_\_  
Gam  
map

rot 0 0 0 0 0 0 0 0 0 0 0 0 0 0 0 0 0 0 0  
eob . . . . . . . . . . . . . . . . . . . . . .  
act 2 1 1 2 0 0 0 0 0 0 0 0 0 0 0 0 0 0 0  
eri 0 9 4 0 9 4 5 5 5 5 4 6 8 5 5 5 4 6 1 0 0 0 0 0 0 0 0 0 0 0 0 0 0 0























\_un  
cla  
ssi  
fie  
d|f  
\_\_G  
amm  
apr  
ote  
oba  
cte  
ria

\_un  
cla  
ssi  
fie  
d|g  
\_\_G  
amm  
apr  
ote  
oba  
cte  
ria

\_un  
cla  
ssi  
fie  
d|s  
\_\_G  
amm  
apr  
ote  
oba  
cte  
ria

\_un  
cla  
ssi  
fie  
d

d\_\_ 0 0 0 0 0 0 0 0 0 0 0 0 0 0 0 0 0 0 0 0  
Bac . . . . .  
ter 0 0 0 0 0 0 0 0 0 0 0 0 0 0 0 0 0 0 0 0 0 0 0 0 0

ia| 3 2 2 3 8 4 4 5 4 3 5 4 6 3 5 4 3 3 2 1

p\_\_

Pro

teo

bac

ter

ia|

c\_\_

Gam

map

rot

eob

act

eri

a|o

\_\_L

egi

one

lla

les

d\_\_

Bac

ter

ia|

p\_\_

Pro

teo

bac

ter

ia|

c\_\_

Gam

map

rot

eob

act

eri

a|o

\_\_L

egi

one 0 0 0 0 0 0 0 0 0 0 0 0 0 0 0 0 0 0 0 0

lla . . . . .

les 0 0 0 0 0 0 0 0 0 0 0 0 0 0 0 0 0 0 0 0

|f\_ 3 2 2 3 8 4 4 5 4 3 5 4 6 3 5 4 3 3 2 1 0 0 0 0 0 0 0 0 0 0 0 0 0 0

```

_Le
gio
nel
lac
eae
d__
Bac
ter
ia|
p__
Pro
teo
bac
ter
ia|
c__
Gam
map
rot
eob
act
eri
a|o
__L
egi
one
lla
les
|f_
_Le
gio
nel
lac
eae
lg_
_Le 0 0 0 0 0 0 0 0 0 0 0 0 0 0 0 0 0 0 0 0 0 0 0 0 0 0 0 0 0 0 0 0
gio . . . . .
nel 0 0 0 0 0 0 0 0 0 0 0 0 0 0 0 0 0 0 0 0 0 0 0 0 0 0 0 0 0 0 0 0
la  3 2 2 3 8 4 4 5 4 3 5 4 6 3 5 4 3 3 2 1 0 0 0 0 0 0 0 0 0 0 0 0 0 0 0 0
d__
Bac 0 0 0 0 0 0 0 0 0 0 0 0 0 0 0 0 0 0 0 0 0 0 0 0 0 0 0 0 0 0 0 0
ter . . . . .
ia| 0 0 0 0 0 0 0 0 0 0 0 0 0 0 0 0 0 0 0 0 0 0 0 0 0 0 0 0 0 0 0 0
p__ 3 2 2 3 8 4 4 5 4 3 5 4 6 3 5 4 3 3 2 0 0 0 0 0 0 0 0 0 0 0 0 0 0 0 0

```



```

teo
bac
ter
ial
c__
Gam
map
rot
eob
act
eri
al|o
__L
egi
one
lla
les
|f_
_Le
gio
nel
lac
eae
|g_
_Le
gio
nel
la|
s__
Leg
ion
ell
a_s
p._
S09
0
d__
Bac
ter
ial
p__      0      0      0      0
Pro      .      .      .      .
teo      0      0      0      0
bac 0 0 0 0 3 0 0 0 0 1 0 0 0 0 0 0 0 0 1 0 0 0 0 1 0 0 0 0 0 0 0 0

```



|     |                                                                 |   |   |   |
|-----|-----------------------------------------------------------------|---|---|---|
| Bac | .                                                               | . | . | . |
| ter | 0                                                               | 0 | 0 | 0 |
| ia  | 3                                                               | 1 | 1 | 1 |
| p__ |                                                                 |   |   |   |
| Pro |                                                                 |   |   |   |
| teo |                                                                 |   |   |   |
| bac |                                                                 |   |   |   |
| ter |                                                                 |   |   |   |
| ia  |                                                                 |   |   |   |
| c__ |                                                                 |   |   |   |
| Gam |                                                                 |   |   |   |
| map |                                                                 |   |   |   |
| rot |                                                                 |   |   |   |
| eob |                                                                 |   |   |   |
| act |                                                                 |   |   |   |
| eri |                                                                 |   |   |   |
| a o |                                                                 |   |   |   |
| __N |                                                                 |   |   |   |
| evs |                                                                 |   |   |   |
| kia |                                                                 |   |   |   |
| les |                                                                 |   |   |   |
| f_  |                                                                 |   |   |   |
| _Si |                                                                 |   |   |   |
| nob |                                                                 |   |   |   |
| act |                                                                 |   |   |   |
| era |                                                                 |   |   |   |
| cea |                                                                 |   |   |   |
| e g |                                                                 |   |   |   |
| __S |                                                                 |   |   |   |
| ter |                                                                 |   |   |   |
| oid |                                                                 |   |   |   |
| oba |                                                                 |   |   |   |
| cte |                                                                 |   |   |   |
| r   |                                                                 |   |   |   |
| d__ |                                                                 |   |   |   |
| Bac |                                                                 |   |   |   |
| ter |                                                                 |   |   |   |
| ia  |                                                                 |   |   |   |
| p__ |                                                                 |   |   |   |
| Pro |                                                                 |   |   |   |
| teo | 0                                                               | 0 | 0 | 0 |
| bac | .                                                               | . | . | . |
| ter | 0                                                               | 0 | 0 | 0 |
| ia  | 0 0 0 0 3 0 0 0 0 1 0 0 0 0 0 0 0 0 1 0 0 0 0 1 0 0 0 0 0 0 0 0 |   |   |   |











|     |   |   |   |   |   |   |   |   |   |   |   |   |   |   |   |   |   |   |   |   |   |   |   |   |   |   |   |   |   |   |   |
|-----|---|---|---|---|---|---|---|---|---|---|---|---|---|---|---|---|---|---|---|---|---|---|---|---|---|---|---|---|---|---|---|
| ia  | 0 |   | 0 |   | 3 | 2 | 1 | 1 | 4 | 8 | 9 | 7 | 7 | 6 | 9 | 4 | 1 | 1 | 1 | 2 | 1 | 3 | 2 |   |   |   |   |   |   |   |   |
| p__ |   |   |   |   |   |   |   |   |   |   |   |   |   |   |   |   |   |   |   |   |   |   |   |   |   |   |   |   |   |   |   |
| Pro |   |   |   |   |   |   |   |   |   |   |   |   |   |   |   |   |   |   |   |   |   |   |   |   |   |   |   |   |   |   |   |
| teo |   |   |   |   |   |   |   |   |   |   |   |   |   |   |   |   |   |   |   |   |   |   |   |   |   |   |   |   |   |   |   |
| bac |   |   |   |   |   |   |   |   |   |   |   |   |   |   |   |   |   |   |   |   |   |   |   |   |   |   |   |   |   |   |   |
| ter |   |   |   |   |   |   |   |   |   |   |   |   |   |   |   |   |   |   |   |   |   |   |   |   |   |   |   |   |   |   |   |
| ia  |   |   |   |   |   |   |   |   |   |   |   |   |   |   |   |   |   |   |   |   |   |   |   |   |   |   |   |   |   |   |   |
| c__ |   |   |   |   |   |   |   |   |   |   |   |   |   |   |   |   |   |   |   |   |   |   |   |   |   |   |   |   |   |   |   |
| Gam |   |   |   |   |   |   |   |   |   |   |   |   |   |   |   |   |   |   |   |   |   |   |   |   |   |   |   |   |   |   |   |
| map |   |   |   |   |   |   |   |   |   |   |   |   |   |   |   |   |   |   |   |   |   |   |   |   |   |   |   |   |   |   |   |
| rot |   |   |   |   |   |   |   |   |   |   |   |   |   |   |   |   |   |   |   |   |   |   |   |   |   |   |   |   |   |   |   |
| eob |   |   |   |   |   |   |   |   |   |   |   |   |   |   |   |   |   |   |   |   |   |   |   |   |   |   |   |   |   |   |   |
| act |   |   |   |   |   |   |   |   |   |   |   |   |   |   |   |   |   |   |   |   |   |   |   |   |   |   |   |   |   |   |   |
| eri |   |   |   |   |   |   |   |   |   |   |   |   |   |   |   |   |   |   |   |   |   |   |   |   |   |   |   |   |   |   |   |
| alo |   |   |   |   |   |   |   |   |   |   |   |   |   |   |   |   |   |   |   |   |   |   |   |   |   |   |   |   |   |   |   |
| __P |   |   |   |   |   |   |   |   |   |   |   |   |   |   |   |   |   |   |   |   |   |   |   |   |   |   |   |   |   |   |   |
| ast | 0 |   | 0 |   | 0 | 0 | 0 | 0 | 0 | 0 | 0 | 0 | 0 | 0 | 0 | 0 | 0 | 0 | 0 | 0 | 0 | 0 | 0 |   |   |   |   |   |   |   |   |
| eur | . |   | . |   | . | . | . | . | . | . | . | . | . | . | . | . | . | . | . | . | . | . | . |   |   |   |   |   |   |   |   |
| ell | 0 |   | 0 |   | 0 | 0 | 0 | 0 | 1 | 0 | 0 | 0 | 0 | 0 | 0 | 0 | 0 | 0 | 0 | 0 | 0 | 0 | 0 |   |   |   |   |   |   |   |   |
| ale | 0 | 0 | 0 | 0 | 0 | 0 | 0 | 0 | 0 | 3 | 2 | 0 | 1 | 0 | 1 | 0 | 4 | 8 | 9 | 7 | 7 | 6 | 9 | 4 | 1 | 1 | 1 | 2 | 1 | 3 | 2 |





|     |   |   |
|-----|---|---|
| Bac | . | . |
| ter | 0 | 0 |
| ial | 0 | 2 |
| p__ |   |   |
| Pro |   |   |
| teo |   |   |
| bac |   |   |
| ter |   |   |
| ial |   |   |
| c__ |   |   |
| Gam |   |   |
| map |   |   |
| rot |   |   |
| eob |   |   |
| act |   |   |
| eri |   |   |
| alo |   |   |
| __P |   |   |
| ast |   |   |
| eur |   |   |
| ell |   |   |
| ale |   |   |
| s f |   |   |
| __P |   |   |
| ast |   |   |
| eur |   |   |
| ell |   |   |
| ace |   |   |
| ae  |   |   |
| g__ |   |   |
| Act |   |   |
| ino |   |   |
| bac |   |   |
| ill |   |   |
| us  |   |   |
| s__ |   |   |
| unc |   |   |
| ult |   |   |
| ure |   |   |
| d_A |   |   |
| cti |   |   |
| nob |   |   |
| aci |   |   |
| llu |   |   |















ter  
ial  
c\_\_  
Gam  
map  
rot  
eob  
act  
eri  
alo  
\_\_P  
seu  
dom  
ona  
dal  
es|  
f\_\_  
Mar  
ino  
bac  
ter  
ace  
ael  
g\_\_  
Mar  
ino  
bac  
ter  
d\_\_  
Bac  
ter  
ial  
p\_\_  
Pro  
teo  
bac  
ter  
ial  
c\_\_  
Gam  
map  
rot  
eob  
act 0 0 0 0 0 0 0 0 0 0 0 0 0 0 0 0 0 0 0 0 0 0 0 0 0 0 0 0

```

eri
a|o
__P
seu
dom
ona
dal
es|
f__
Mar
ino
bac
ter
ace
ae|
g__
Mar
ino
bac
ter
|s_
_Ma
rin
oba
cte
r_u
ncl
ass
ifi
ed
d__
Bac
ter
ia|
p__
Pro
teo
bac
ter
ia|
c__      0          0 0      0      0 1          0  0 0 0 0 0 0
Gam      .          . .      .      . .          .  . . . . . .
map      0          0 0      0      0 7          0  0 0 0 0 0 0
rot 0 0 0 0 0 0 0 0 0 0 0 0 1 1 0 0 0 0 0 1 8 0 0 0 0 0 0 0 8 0 4 1 1 3 3 7

```



























```

teo
bac
ter
ial
c__
Gam
map
rot
eob
act
eri
alo
__P
seu
dom
ona
dal
es|
f__
Mor
axe
lla
cea
elg
__M
ora
xel
la|
s__
Mor
axe
lla
_pl
ura
nim
ali
um
d__
Bac
ter
ial          0          0 1          0 0
p__          .          . .          . .
Pro          0          0 7          0 0
teo 0 0 0 0 0 0 0 0 0 0 0 0 0 1 0 0 0 0 0 0 0 8 0 0 0 0 0 0 0 0 0 0 0 0 0 0 0 0 0 0 0 0 0 0 2

```

```

bac
ter
ia|
c__
Gam
map
rot
eob
act
eri
a|o
__P
seu
dom
ona
dal
es|
f__
Mor
axe
lla
cea
e|g
__P
syc
hro
bac
ter
d__
Bac
ter
ia|
p__
Pro
teo
bac
ter
ia|
c__
Gam
map              0          0 0          0
rot              .          . .          .
eob              0          0 0          0
act 0 0 0 0 0 0 0 0 0 0 0 0 0 0 1 0 0 0 0 0 0 0 0 2 0 0 0 0 0 0 0 0 0 0 0 0 0 0 0 0 0 0 0 0 0 0 0 0 0 2

```





|     |                                                                               |
|-----|-------------------------------------------------------------------------------|
| act |                                                                               |
| eri |                                                                               |
| a o |                                                                               |
| __P |                                                                               |
| seu |                                                                               |
| dom |                                                                               |
| ona |                                                                               |
| dal |                                                                               |
| es  |                                                                               |
| f__ |                                                                               |
| Mor |                                                                               |
| axe |                                                                               |
| lla |                                                                               |
| cea |                                                                               |
| e g |                                                                               |
| __P |                                                                               |
| syc |                                                                               |
| hro |                                                                               |
| bac |                                                                               |
| ter |                                                                               |
| s_  |                                                                               |
| _Ps |                                                                               |
| ych |                                                                               |
| rob |                                                                               |
| act |                                                                               |
| er_ |                                                                               |
| unc |                                                                               |
| las |                                                                               |
| sif |                                                                               |
| ied |                                                                               |
| d__ |                                                                               |
| Bac |                                                                               |
| ter |                                                                               |
| ia  |                                                                               |
| p__ |                                                                               |
| Pro |                                                                               |
| teo |                                                                               |
| bac |                                                                               |
| ter |                                                                               |
| ia  |                                                                               |
| c__ | 1                                                                             |
| Gam | .                                                                             |
| map | 7                                                                             |
| rot | 0 0 0 0 0 0 0 0 0 0 0 0 0 0 0 0 0 0 0 0 0 5 0 0 0 0 0 0 0 0 0 0 0 0 0 0 0 0 0 |





















```

udo
mon
ada
cea
e|g
__P
seu
dom
ona
s|s
__P
seu
dom
ona
s_s
p._
S-2
d__
Bac
ter
ia|
p__
Pro
teo
bac
ter
ia|
c__
Gam
map
rot
eob
act
eri
a|o
__P
seu
dom
ona
dal
es|    0 0 0 0 0 0 0 0 0 0 0 0 0 0 0 0 0
f__    . . . . . . . . . . . . . . . .
Pse    0 0 0 0 0 0 0 0 0 0 0 0 0 0 0 0 0
udo    0 1 1 2 4 2 3 4 2 3 1 1 5 2 2 2 2 0 0 0 0 0 0 0 0 0 0 0 0 0 0 0

```



p\_\_  
Pro  
teo  
bac  
ter  
ial  
c\_\_  
Gam  
map  
rot  
eob  
act  
eri  
alo  
\_\_R  
7C2  
4|f  
\_\_R  
7C2  
4\_u  
ncl  
ass  
ifi  
ed  
d\_\_  
Bac  
ter  
ial  
p\_\_  
Pro  
teo  
bac  
ter  
ial  
c\_\_  
Gam  
map  
rot  
eob  
act  
eri  
alo  
\_\_R  
7C2

```
                                0      0  
                                .      .  
                                0      0  
0 0 0 0 0 0 0 0 0 0 0 0 0 0 0 0 0 0 0 0 0 0 0 0 0 0 0 0 0 0
```

















ral  
es|  
f\_\_  
Ste  
roi  
dob  
act  
era  
cea  
elg  
\_\_s  
ter  
oid  
oba  
cte  
r|s  
\_\_s  
ter  
oid  
oba  
cte  
r\_u  
ncl  
ass  
ifi  
ed  
d\_\_  
Bac  
ter  
ial  
p\_\_  
Pro  
teo  
bac  
ter  
ial  
c\_\_  
Gam  
map  
rot  
eob 0  
act .  
eri 0  
a|o 0 0 0 0 0 0 0 1 0 0 0 0 0 0 0 0 0 0 0 0 0 0 0 0 0 0 0 0 0 0 0 0 0 0 0 0

\_\_v

ibr

ion

ale

s

d\_\_

Bac

ter

ial

p\_\_

Pro

teo

bac

ter

ial

c\_\_

Gam

map

rot

eob

act

eri

alo

\_\_v

ibr

ion

ale

s|f

\_\_v

ibr

0

ion

.

ace

0

ae

0 0 0 0 0 0 0 1 0 0 0 0 0 0 0 0 0 0 0 0 0 0 0 0 0 0 0 0 0 0 0 0 0 0

d\_\_

Bac

ter

ial

p\_\_

Pro

teo

bac

0

ter

.

ial

0

c\_\_

0 0 0 0 0 0 0 1 0 0 0 0 0 0 0 0 0 0 0 0 0 0 0 0 0 0 0 0 0 0 0 0 0 0



```

ibr
ion
ace
ae|
g__
Vib
rio
|s_
_un
cul
tur
ed_
Vib
rio
_sp
.
d__
Bac
ter
ia|
p__
Pro
teo
bac
ter
ia|
c__
Gam
map
rot
eob
act
eri
a|o
__X
ant
hom      0 0  0 0 0 0  0 0  0  0  0 0 0 0 0 0 0 0 0 0 0 0 0 0
ona      . .  . . . .  . .  .  .  . . . . . . . . . . . . . .
dal      0 0  0 0 0 0  0 0  0  0  0 0 0 0 0 0 0 0 0 0 0 0 0 0
es  0 0 0 1 2 0 0 1 0 1 0 2 1 0 0 1 0 0 0 2 0 0 0 1 1 1 7 5 3 5 2 3 3 3
d__      0 0  0 0  0 0  0  0  0  0 0 0 0  0  0  0  0
Bac      . .  . .  . .  .  .  . . . .  .  .
ter      0 0  0 0  0 0  0  0  0  0 0 0 0  0  0  0  0
ia|  0 0 0 1 0 0 0 1 0 0 0 1 1 0 0 1 0 0 0 0 0 0 0 0 1 0 0 0 0 0 2 0 1 0 0

```

p\_\_  
Pro  
teo  
bac  
ter  
ial  
c\_\_  
Gam  
map  
rot  
eob  
act  
eri  
a|o  
\_\_x  
ant  
hom  
ona  
dal  
es|  
f\_\_  
Rho  
dan  
oba  
cte  
rac  
eae  
d\_\_  
Bac  
ter  
ial  
p\_\_  
Pro  
teo  
bac  
ter  
ial  
c\_\_  
Gam  
map  
rot  
eob  
act  
eri 0 0 0 0 0 0 0 0 0 0 0 0 0 0 0 0 0 0 0 0 0 0 0 0 0 0 0 0 0 0









```

nel
la|
s__
Dok
don
ell
a_u
ncl
ass
ifi
ed
d__
Bac
ter
ia|
p__
Pro
teo
bac
ter
ia|
c__
Gam
map
rot
eob
act
eri
a|o
__X
ant
hom
ona
dal
es|
f__
Rho
dan
oba
cte
rac      0      0      0      0      0      0      0      0
eae      .      .      .      .      .      .      .      .
lg_      0      0      0      0      0      0      0      0
_Dy 0 0 0 1 0 0 0 1 0 0 0 1 0 0 0 1 0 0 0 0 0 0 0 0 0 1 0 0 0 0 0 0 0 2 0 1 0 0

```

```

ell
a
d__
Bac
ter
ia|
p__
Pro
teo
bac
ter
ia|
c__
Gam
map
rot
eob
act
eri
a|o
__x
ant
hom
ona
dal
es|
f__
Rho
dan
oba
cte
rac
eae
|g_
_Dy
ell
a|s
__D
yel
la_
sp.          0          0          0          0  0
_GR          .          .          .          .  .
_3-         0          0          0          0  0
10  0 0 0 0 0 0 0 1 0 0 0 0 0 0 1 0 0 0 0 0 0 1 0 0 0 0 0 2 0 1 0 0

```







|     |   |   |   |
|-----|---|---|---|
| Bac | . | . |   |
| ter | 0 | 0 |   |
| ial | 0 | 0 |   |
| p__ |   |   |   |
| Pro |   |   |   |
| teo |   |   |   |
| bac |   |   |   |
| ter |   |   |   |
| ial |   |   |   |
| c__ |   |   |   |
| Gam |   |   |   |
| map |   |   |   |
| rot |   |   |   |
| eob |   |   |   |
| act |   |   |   |
| eri |   |   |   |
| alo |   |   |   |
| __x |   |   |   |
| ant |   |   |   |
| hom |   |   |   |
| ona |   |   |   |
| dal |   |   |   |
| es  |   |   |   |
| f__ |   |   |   |
| Rho |   |   |   |
| dan |   |   |   |
| oba |   |   |   |
| cte |   |   |   |
| rac |   |   |   |
| eae |   |   |   |
| lg_ |   |   |   |
| _Ru |   |   |   |
| dae |   |   |   |
| a   |   |   |   |
| d__ |   |   |   |
| Bac |   |   |   |
| ter |   |   |   |
| ial |   |   |   |
| p__ |   |   |   |
| Pro |   |   |   |
| teo |   |   | 0 |
| bac |   |   | . |
| ter |   |   | 0 |
| ial | 0 | 0 | 0 |





```

map
rot
eob
act
eri
a|o
__X
ant
hom
ona
dal
es|
f__
Rho
dan
oba
cte
rac
eae
lg_
_Ru
dae
a|s
__u
ncu
ltu
red
_Ru
dae
a_s
p.
d__
Bac
ter
ia|
p__
Pro
teo
bac
ter
ia|      0      0 0  0 0      0      0 0 0 0 0 0 0 0 0 0
c__      .      . .  . .      .      . . . . . . . . . .
Gam      0      0 0  0 0      0      0 0 0 0 0 0 0 0 0 0
map 0 0 0 0 1 0 0 0 0 1 0 1 1 0 0 0 0 0 0 1 0 0 0 0 1 1 7 5 3 3 2 2 3 3

```









|     |                                                                       |   |     |   |                     |
|-----|-----------------------------------------------------------------------|---|-----|---|---------------------|
| ter | 0                                                                     | 0 | 0 0 | 0 | 0 0 0 0 0 0 0 0     |
| ial | 1                                                                     | 1 | 1 1 | 1 | 0 7 5 3 3 1 2 3 3   |
| p__ |                                                                       |   |     |   |                     |
| Pro |                                                                       |   |     |   |                     |
| teo |                                                                       |   |     |   |                     |
| bac |                                                                       |   |     |   |                     |
| ter |                                                                       |   |     |   |                     |
| ial |                                                                       |   |     |   |                     |
| c__ |                                                                       |   |     |   |                     |
| Gam |                                                                       |   |     |   |                     |
| map |                                                                       |   |     |   |                     |
| rot |                                                                       |   |     |   |                     |
| eob |                                                                       |   |     |   |                     |
| act |                                                                       |   |     |   |                     |
| eri |                                                                       |   |     |   |                     |
| a o |                                                                       |   |     |   |                     |
| __X |                                                                       |   |     |   |                     |
| ant |                                                                       |   |     |   |                     |
| hom |                                                                       |   |     |   |                     |
| ona |                                                                       |   |     |   |                     |
| dal |                                                                       |   |     |   |                     |
| es  |                                                                       |   |     |   |                     |
| f__ |                                                                       |   |     |   |                     |
| Xan |                                                                       |   |     |   |                     |
| tho |                                                                       |   |     |   |                     |
| mon |                                                                       |   |     |   |                     |
| ada |                                                                       |   |     |   |                     |
| cea |                                                                       |   |     |   |                     |
| e g |                                                                       |   |     |   |                     |
| __P |                                                                       |   |     |   |                     |
| seu |                                                                       |   |     |   |                     |
| dox |                                                                       |   |     |   |                     |
| ant |                                                                       |   |     |   |                     |
| hom |                                                                       |   |     |   |                     |
| ona |                                                                       |   |     |   |                     |
| s   |                                                                       |   |     |   |                     |
| d__ |                                                                       |   |     |   |                     |
| Bac |                                                                       |   |     |   |                     |
| ter |                                                                       |   |     |   |                     |
| ial |                                                                       |   |     |   |                     |
| p__ | 0                                                                     | 0 | 0 0 | 0 | 0 0 0 0 0 0 0 0     |
| Pro | .                                                                     | . | . . | . | . . . . . . . . . . |
| teo | 0                                                                     | 0 | 0 0 | 0 | 0 0 0 0 0 0 0 0     |
| bac | 0 0 0 0 1 0 0 0 0 1 0 1 1 0 0 0 0 0 0 1 0 0 0 0 0 0 0 7 5 3 3 1 2 3 3 |   |     |   |                     |

ter  
ial  
c\_\_  
Gam  
map  
rot  
eob  
act  
eri  
a|o  
\_\_x  
ant  
hom  
ona  
dal  
es|  
f\_\_  
Xan  
tho  
mon  
ada  
cea  
e|g  
\_\_P  
seu  
dox  
ant  
hom  
ona  
s|s  
\_\_u  
ncu  
ltu  
red  
\_Ps  
eud  
oxa  
nth  
omo  
nas  
\_sp  
.

d\_\_ 0 0 0 0  
Bac 0 0 0 0 0 0 0 0 0 0 . 0 0 0 . 0 0 0 0 0 0 0 0 0 0 0 0 0 0 0 0 0 0 . . 0 0 0 0 0 0 0 0 0 0



```

ter          0 0          0 0
ial          0 1          1 1
p__
Pro
teo
bac
ter
ial
c__
Gam
map
rot
eob
act
eri
a|o
__X
ant
hom
ona
dal
es|
f__
Xan
tho
mon
ada
cea
e|g
__S
ten
otr
oph
omo
nas
d__
Bac
ter
ial
p__
Pro          0          0 0
teo          .          . .
bac          0          0 0
ter 0 0 0 0 0 0 0 0 0 0 0 1 0 0 0 0 0 0 0 0 0 0 0 1 1 0 0 0 0 0 0 0 0

```







ia|

c\_\_

Gam

map

rot

eob

act

eri

alo

\_\_x

ant

hom

ona

dal

es|

f\_\_

Xan

tho

mon

ada

cea

e|g

\_\_x

ant

hom

ona

s|s

\_\_x

ant

hom

ona

s\_p

has

eol

i

d\_\_

Bac

ter

ial

p\_\_

Pro

teo

bac

ter

0 0 0 0 0 0 0 0 0 0 0 0 0 0 0 0 0 0 0 0 0 0 0 0 0 0 0 0 0 0 0 0 0 0 0 0 0 0 0 0 0 0 0 0 0 0 0 0 0 0 0 0 0 0 0 0 0 1 0

0

.

0





Pro  
teo  
bac  
ter  
ia|  
c\_\_  
Pro  
teo  
bac  
ter  
ia\_  
unc  
las  
sif  
ied  
|o\_  
\_Pr  
ote  
oba  
cte  
ria  
\_un  
cla  
ssi  
fie  
d|f  
\_\_P  
rot  
eob  
act  
eri  
a\_u  
ncl  
ass  
ifi  
ed|  
g\_\_  
Pro  
teo  
bac  
ter  
ia\_  
unc  
las





```

Pro
teo
bac
ter
ia_
unc
las
sif
ied
|s_
_Pr
ote
oba
cte
ria
_un
cla
ssi
fie
d
d__
Bac
ter
ia|
p__
Spi
roc
hae
tot
a 0 0 0 0 0 0 0 0 0 0 0 0 0 1 0 0 1 0 0 0 1 0 0 0 0 0 0 0 0 0 0 0 0 0 0 0 0 0
d__
Bac
ter
ia|
p__
Spi
roc
hae
tot
a|c
__S
pir
och
aet 0 0 0 0 0 0 0 0 0 0 0 0 0 1 0 0 1 0 0 0 1 0 0 0 0 0 0 0 0 0 0 0 0 0 0 0 0 0

```

```

ia
d__
Bac
ter
ial
p__
Spi
roc
hae
tot
al|c
__s
pir
och
aet
ial
o__
Spi
roc               0   0   0
hae               .   .   .
tal               0   0   0
es  0 0 0 0 0 0 0 0 0 0 0 0 1 0 0 1 0 0 0 1 0 0 0 0 0 0 0 0 0 0 0 0 0 0 0 0 0 0

```

```

d__
Bac
ter
ial
p__
Spi
roc
hae
tot
al|c
__s
pir
och
aet
ial
o__
Spi
roc               0   0   0
hae               .   .   .
es|               0   0   0
f__ 0 0 0 0 0 0 0 0 0 0 0 0 1 0 0 1 0 0 0 1 0 0 0 0 0 0 0 0 0 0 0 0 0 0 0 0 0

```













```

__M
oll
icu
tes
_un
cla
ssi
fie
d|g
__M
oll
icu
tes
_un
cla
ssi
fie
d|s
__M
oll
icu
tes
_un
cla
ssi
fie
d
d__
Bac
ter
ia|
p__
Ver
ruc
omi 0 0 0 0 0 0 0 0 0 0 0 0 0 0 0 0 0 0 0 0 0 0 2 0 6 0 0 0 0 0 0 0
cro . . . . . . . . . . . . . . . . . . . . . . . . . . . . . . . . . . . .
bio 1 2 3 3 8 4 3 6 4 4 3 4 1 1 0 1 0 0 0 0 0 8 0 0 2 1 6 1 0 1 3 0 1 1
ta 9 0 1 0 3 0 9 3 1 0 5 8 2 0 8 0 5 8 8 7 6 3 5 7 4 5 7 4 8 7 2 7 2 2
d__
Bac
ter
ia|
p__
Ver
ruc
omi 0 0 0 0 0 0 0 0 0 0 0 0 0 0 0 0 0 0 0 0 0 0 2 0 6 0 0 0 0 0 0 0
cro . . . . . . . . . . . . . . . . . . . . . . . . . . . . . . . . . . . .
bio 1 2 3 3 8 4 3 6 4 4 3 4 1 1 0 1 0 0 0 0 0 8 0 0 2 1 6 1 0 1 3 0 1 1
ta 9 0 1 0 3 0 9 3 1 0 5 8 2 0 8 0 5 8 8 7 6 3 5 7 4 5 7 4 8 7 2 7 2 2

```







e|o  
\_\_C  
hth  
oni  
oba  
cte  
ral  
es|  
f\_\_  
Xip  
hin  
ema  
tob  
act  
era  
cea  
e|g  
\_\_C  
and  
ida  
tus  
\_Xi  
phi  
nem  
ato  
bac  
ter  
|s\_  
\_Ca  
ndi  
dat  
us\_  
Xip  
hin  
ema  
tob  
act  
er\_  
unc  
las  
sif  
ied  
d\_\_ 0 0 0 0 0 0 0 0 0 0 0 0 0 0 0 0 0 0 0 0 0 0 0 0 0 0 0 0 2 0 5 0 0 0 0 0 0 0  
Bac . . . . . 6 . . . . .

ter 1 2 3 3 8 4 3 6 4 4 3 4 1 1 0 1 0 0 0 0 0 8 0 0 2 1 . 1 0 1 3 0 1 1  
ia| 9 0 1 0 3 0 9 3 1 0 5 8 2 0 8 0 5 8 8 7 6 3 5 7 4 5 6 4 8 7 2 7 2 2  
p\_\_ 7

Ver  
ruc  
omi  
cro  
bio  
ta|  
c\_\_  
Ver  
ruc  
omi  
cro  
bia  
e|o  
\_\_v  
err  
uco  
mic  
rob  
ial  
es  
d\_\_  
Bac  
ter  
ia|  
p\_\_  
Ver  
ruc  
omi  
cro  
bio  
ta|  
c\_\_  
Ver  
ruc  
omi  
cro  
bia

5  
e|o 0 0 0 0 0 0 0 0 0 0 0 0 0 0 0 0 0 0 0 0 0 0 0 0 2 0 6 0 0 0 0 0 0 0  
\_\_v . . . . .  
err 1 1 2 2 5 2 2 4 2 2 3 3 1 0 0 0 0 0 0 0 0 8 0 0 2 1 6 1 0 1 3 0 1 1  
uco 5 6 5 5 9 6 6 8 8 9 0 7 0 9 6 9 4 7 7 7 6 3 5 7 4 5 7 4 8 7 2 7 2 2

mic  
rob  
ial  
es|  
f\_\_  
Akk  
erm  
ans  
iac  
eae  
d\_\_  
Bac  
ter  
ial|  
p\_\_  
Ver  
ruc  
omi  
cro  
bio  
tal|  
c\_\_  
Ver  
ruc  
omi  
cro  
bia  
elo  
\_\_v  
err  
uco  
mic  
rob  
ial  
es|  
f\_\_  
Akk  
erm  
ans  
iac

5

|     |   |   |   |   |   |   |   |   |   |   |   |   |   |   |   |   |   |   |   |   |   |   |   |   |   |   |   |   |   |   |   |   |   |   |
|-----|---|---|---|---|---|---|---|---|---|---|---|---|---|---|---|---|---|---|---|---|---|---|---|---|---|---|---|---|---|---|---|---|---|---|
| eae | 0 | 0 | 0 | 0 | 0 | 0 | 0 | 0 | 0 | 0 | 0 | 0 | 0 | 0 | 0 | 0 | 0 | 0 | 0 | 0 | 0 | 2 | 0 | 6 | 0 | 0 | 0 | 0 | 0 | 0 | 0 |   |   |   |
| lg_ | . | . | . | . | . | . | . | . | . | . | . | . | . | . | . | . | . | . | . | . | . | . | . | . | . | . | . | . | . | . | . |   |   |   |
| _Ak | 1 | 1 | 2 | 2 | 5 | 2 | 2 | 4 | 2 | 2 | 3 | 3 | 1 | 0 | 0 | 0 | 0 | 0 | 0 | 0 | 0 | 8 | 0 | 0 | 2 | 1 | 6 | 1 | 0 | 1 | 3 | 0 | 1 | 1 |
| ker | 5 | 6 | 5 | 5 | 9 | 6 | 6 | 8 | 8 | 9 | 0 | 7 | 0 | 9 | 6 | 9 | 4 | 7 | 7 | 7 | 6 | 3 | 5 | 7 | 4 | 5 | 7 | 4 | 8 | 7 | 2 | 7 | 2 | 2 |

man  
 sia  
 d\_\_  
 Bac  
 ter  
 ia|  
 p\_\_  
 Ver  
 ruc  
 omi  
 cro  
 bio  
 ta|  
 c\_\_  
 Ver  
 ruc  
 omi  
 cro  
 bia  
 e|o  
 \_\_v  
 err  
 uco  
 mic  
 rob  
 ial  
 es|  
 f\_\_  
 Akk  
 erm  
 ans  
 iac  
 eae  
 |g\_  
 \_Ak  
 ker  
 man  
 sia  
 |s\_  
 \_Ak

5

|     |   |   |   |   |   |   |   |   |   |   |   |   |   |   |   |   |   |   |   |   |   |   |   |   |   |   |   |   |   |   |   |   |   |   |
|-----|---|---|---|---|---|---|---|---|---|---|---|---|---|---|---|---|---|---|---|---|---|---|---|---|---|---|---|---|---|---|---|---|---|---|
| ker | 0 | 0 | 0 | 0 | 0 | 0 | 0 | 0 | 0 | 0 | 0 | 0 | 0 | 0 | 0 | 0 | 0 | 0 | 0 | 0 | 0 | 2 | 0 | 6 | 0 | 0 | 0 | 0 | 0 | 0 | 0 | 0 |   |   |
| man | . | . | . | . | . | . | . | . | . | . | . | . | . | . | . | . | . | . | . | . | . | . | . | . | . | . | . | . | . | . | . | . | . |   |
| sia | 1 | 1 | 2 | 2 | 5 | 2 | 2 | 4 | 2 | 2 | 3 | 3 | 1 | 0 | 0 | 0 | 0 | 0 | 0 | 0 | 0 | 8 | 0 | 0 | 2 | 1 | 6 | 1 | 0 | 1 | 3 | 0 | 1 | 1 |
| _un | 5 | 6 | 5 | 5 | 9 | 6 | 6 | 8 | 8 | 9 | 0 | 7 | 0 | 9 | 6 | 9 | 4 | 7 | 7 | 7 | 6 | 3 | 5 | 7 | 4 | 5 | 7 | 4 | 8 | 7 | 2 | 7 | 2 | 2 |











```

ae|
g__
Hal
ofe
rul
a|s
__H
alo
fer
ula
_un
cla
ssi
fie
d
d__
unc 0 0 0 0 0 0 0 0 0 0 0 0 1 0 0 0 0 0 0 0 0 0 0 0 0 0 1 1 0 0 0 0 1 0 0 0
las . . . . .
sif 2 3 0 1 0 1 3 1 6 1 1 2 0 0 1 0 1 2 1 1 0 0 4 4 8 8 3 7 1 1 3 6 1 3
ied 0 2 5 8 5 5 1 1 6 6 4 9 5 2 2 8 1 7 5 5 3 2 3 6 6 3 5 3 8 5 4 0 3 0
d__
unc
las
sif
ied
lp_
_un
cla 0 0 0 0 0 0 0 0 0 0 0 0 1 0 0 0 0 0 0 0 0 0 0 0 0 0 1 1 0 0 0 0 1 0 0 0
ssi . . . . .
fie 2 3 0 1 0 1 3 1 6 1 1 2 0 0 1 0 1 2 1 1 0 0 4 4 8 8 3 7 1 1 3 6 1 3
d   0 2 5 8 5 5 1 1 6 6 4 9 5 2 2 8 1 7 5 5 3 2 3 6 6 3 5 3 8 5 4 0 3 0
d__
unc
las
sif
ied
lp_
_un
cla
ssi
fie 0 0 0 0 0 0 0 0 0 0 0 0 1 0 0 0 0 0 0 0 0 0 0 0 0 0 1 1 0 0 0 0 1 0 0 0
d|c . . . . .
__u 2 3 0 1 0 1 3 1 6 1 1 2 0 0 1 0 1 2 1 1 0 0 4 4 8 8 3 7 1 1 3 6 1 3
ncl 0 2 5 8 5 5 1 1 6 6 4 9 5 2 2 8 1 7 5 5 3 2 3 6 6 3 5 3 8 5 4 0 3 0

```

ass  
ifi  
ed  
d\_\_  
unc  
las  
sif  
ied  
lp\_  
\_un  
cla  
ssi  
fie  
d|c  
\_\_u  
ncl  
ass  
ifi  
ed|

o\_\_  
unc 0 0 0 0 0 0 0 0 0 0 0 0 1 0 0 0 0 0 0 0 0 0 0 0 0 0 0 1 1 0 0 0 0 0 1 0 0 0  
las . . . . .  
sif 2 3 0 1 0 1 3 1 6 1 1 2 0 0 1 0 1 2 1 1 0 0 4 4 8 8 3 7 1 1 3 6 1 3  
ied 0 2 5 8 5 5 1 1 6 6 4 9 5 2 2 8 1 7 5 5 3 2 3 6 6 3 5 3 8 5 4 0 3 0

d\_\_  
unc  
las  
sif  
ied  
lp\_  
\_un  
cla  
ssi  
fie  
d|c  
\_\_u  
ncl  
ass  
ifi  
ed|

o\_\_ 0 0 0 0 0 0 0 0 0 0 0 0 1 0 0 0 0 0 0 0 0 0 0 0 0 0 0 1 1 0 0 0 0 0 1 0 0 0  
unc . . . . .  
las 2 3 0 1 0 1 3 1 6 1 1 2 0 0 1 0 1 2 1 1 0 0 4 4 8 8 3 7 1 1 3 6 1 3  
sif 0 2 5 8 5 5 1 1 6 6 4 9 5 2 2 8 1 7 5 5 3 2 3 6 6 3 5 3 8 5 4 0 3 0

ied  
|f\_  
\_un  
cla  
ssi  
fie  
d

d\_\_  
unc  
las  
sif  
ied

|p\_  
\_un  
cla  
ssi  
fie  
d|c

\_\_u  
ncl  
ass  
ifi  
ed|

o\_\_  
unc  
las  
sif  
ied

|f\_  
\_un  
cla  
ssi  
fie  
d|g

\_\_u  
ncl  
ass  
ifi  
ed  
d\_\_  
unc  
las  
sif  
ied

|   |   |   |   |   |   |   |   |   |   |   |   |   |   |   |   |   |   |   |   |   |   |   |   |   |   |   |   |   |   |   |   |   |   |   |   |   |
|---|---|---|---|---|---|---|---|---|---|---|---|---|---|---|---|---|---|---|---|---|---|---|---|---|---|---|---|---|---|---|---|---|---|---|---|---|
| 0 | 0 | 0 | 0 | 0 | 0 | 0 | 0 | 0 | 0 | 0 | 0 | 1 | 0 | 0 | 0 | 0 | 0 | 0 | 0 | 0 | 0 | 0 | 0 | 0 | 1 | 1 | 0 | 0 | 0 | 0 | 1 | 0 | 0 | 0 |   |   |
| . | . | . | . | . | . | . | . | . | . | . | . | . | . | . | . | . | . | . | . | . | . | . | . | . | . | . | . | . | . | . | . | . | . | . | . | . |
| 2 | 3 | 0 | 1 | 0 | 1 | 3 | 1 | 6 | 1 | 1 | 2 | 0 | 0 | 1 | 0 | 1 | 2 | 1 | 1 | 0 | 0 | 4 | 4 | 8 | 8 | 3 | 7 | 1 | 1 | 3 | 6 | 1 | 3 |   |   |   |
| 0 | 2 | 5 | 8 | 5 | 5 | 1 | 1 | 6 | 6 | 4 | 9 | 5 | 2 | 2 | 8 | 1 | 7 | 5 | 5 | 3 | 2 | 3 | 6 | 6 | 3 | 5 | 3 | 8 | 5 | 4 | 0 | 3 | 0 |   |   |   |
| 0 | 0 | 0 | 0 | 0 | 0 | 0 | 0 | 0 | 0 | 0 | 0 | 1 | 0 | 0 | 0 | 0 | 0 | 0 | 0 | 0 | 0 | 0 | 0 | 0 | 0 | 1 | 1 | 0 | 0 | 0 | 0 | 1 | 0 | 0 | 0 |   |
| . | . | . | . | . | . | . | . | . | . | . | . | . | . | . | . | . | . | . | . | . | . | . | . | . | . | . | . | . | . | . | . | . | . | . | . | . |
| 2 | 3 | 0 | 1 | 0 | 1 | 3 | 1 | 6 | 1 | 1 | 2 | 0 | 0 | 1 | 0 | 1 | 2 | 1 | 1 | 0 | 0 | 4 | 4 | 8 | 8 | 3 | 7 | 1 | 1 | 3 | 6 | 1 | 3 |   |   |   |
| 0 | 2 | 5 | 8 | 5 | 5 | 1 | 1 | 6 | 6 | 4 | 9 | 5 | 2 | 2 | 8 | 1 | 7 | 5 | 5 | 3 | 2 | 3 | 6 | 6 | 3 | 5 | 3 | 8 | 5 | 4 | 0 | 3 | 0 |   |   |   |

lp\_  
 \_un  
 cla  
 ssi  
 fie  
 d|c  
 \_\_u  
 ncl  
 ass  
 ifi  
 ed|  
 o\_\_  
 unc  
 las  
 sif  
 ied  
 |f\_  
 \_un  
 cla  
 ssi  
 fie  
 d|g  
 \_\_u  
 ncl  
 ass  
 ifi  
 ed|  
 s\_\_  
 unc  
 las  
 sif  
 ied

Figure 6C

| CON  | SCOP | TGOL | TGOH |
|------|------|------|------|
| 0.1  | 0.3  | 0    | 0    |
| 0    | 0.7  | 0    | 0    |
| 0.1  | 0    | 0    | 0    |
| 2.4  | 0.3  | 0.1  | 0    |
| 0.16 | 0.3  | 0    | 0    |
| 0    | 15.5 | 0    | 0    |
| 0.6  | 0.9  | 0    | 0    |
|      | 0    | 0    | 0    |
|      |      | 0.4  | 0    |
|      |      | 0    |      |



Figure 6D

| CON  | SCOP | TGOL | TGOH |
|------|------|------|------|
| 0.23 | 0.53 | 0.25 | 0.57 |
| 0.63 | 2.65 | 0.37 | 0.11 |
| 0.23 | 0.4  | 0.35 | 0.09 |
| 0.25 | 0.18 | 0.12 | 0.04 |
| 0.27 | 0.09 | 0.02 | 0.03 |
| 0.64 | 0.07 | 0.03 | 0.14 |
| 0.26 | 0.18 | 0.22 | 0.01 |
|      | 0.15 | 0.08 | 0.05 |
|      |      | 0.1  | 0.09 |
|      |      | 0.02 |      |

Figure 6E

| CON | SCOP | TGOL | TGOH |
|-----|------|------|------|
| 1.4 | 3.6  | 0.4  | 0.1  |
| 1.5 | 0.4  | 1.3  | 0    |
| 0.6 | 0    | 1.2  | 2    |
| 1.8 | 0.7  | 0.2  | 0.5  |
| 1.7 | 0.4  | 0.2  | 0.7  |
| 1   | 3.3  | 0.5  | 2.9  |
| 0.3 | 0.5  | 1.4  | 0.8  |
|     | 0.5  | 0.5  | 0.9  |
|     |      | 0.4  | 0.4  |
|     |      | 0.7  |      |

Figure 6F

| CON  | SCOP | TGOL  | TGOH |
|------|------|-------|------|
| 0.01 | 0.01 | 4.3   | 1.46 |
| 0.02 | 0.01 | 2.03  | 5.94 |
| 0.01 | 0.03 | 3.92  | 0.96 |
| 0.86 | 0.04 | 0.21  | 1.28 |
| 0.4  | 0.03 | 0.11  | 8.09 |
| 0    | 0.17 | 0.25  | 0.03 |
| 0.01 | 0.08 | 0.4   | 0.83 |
|      | 0.06 | 33.05 | 0.05 |
|      |      | 9.56  | 0.26 |
|      |      | 3.25  |      |

Figure 6G

|      |      |      |      |
|------|------|------|------|
| 0.05 | 0.03 | 8.29 | 0.02 |
| 0.1  | 0.04 | 1.42 | 0.04 |
| 0.46 | 0.07 | 1.84 | 0.23 |
| 0.28 | 0.04 | 2.13 | 0.51 |
| 0.94 | 0.06 | 5.58 | 0.54 |

|      |      |      |      |
|------|------|------|------|
| 0.08 | 0.23 | 8.42 | 0.24 |
| 0.06 | 3.29 | 2.18 | 1.44 |
|      | 3.81 | 0.11 | 0.07 |
|      |      | 0.72 | 0.25 |
|      |      | 0.25 |      |

Figure 6H

| CON  | SCOP  | TGOL | TGOH |
|------|-------|------|------|
| 0    | 3.1   | 4.53 | 1.5  |
| 0.01 | 10.92 | 1.71 | 6.52 |
| 0.01 | 0.03  | 3.04 | 1.28 |
| 0.03 | 0.02  | 1.34 | 2.42 |
| 0.02 | 0.01  | 1.22 | 1.5  |
| 0.03 | 0.18  | 0.9  | 0.48 |
| 0.05 | 0.73  | 1.39 | 1.84 |
|      | 0.38  | 2.1  | 0.58 |
|      |       | 1.42 | 1.19 |
|      |       | 2.13 |      |

Figure 6I

| CON  | SCOP | TGOL | TGOH |
|------|------|------|------|
| 0    | 1.84 | 0.27 | 0.74 |
| 0    | 1.46 | 0.07 | 0.61 |
| 0.05 | 0.02 | 0.26 | 0.21 |
| 0.07 | 0.01 | 1.04 | 0.99 |
| 0.11 | 0.99 | 0.26 | 0.15 |
| 0.04 | 0.04 | 0.09 | 0.86 |
| 0.02 | 0.05 | 1.19 | 0.25 |
|      | 0.03 | 0.63 | 0.52 |
|      |      | 2.84 | 1.05 |
|      |      | 0.39 |      |

Figure 6J

| CON  | SCOP | TGOL | TGOH |
|------|------|------|------|
| 0.29 | 0.02 | 0.05 | 0    |
| 0    | 0    | 0.74 | 0.17 |
| 0    | 0.01 | 1.69 | 0    |
| 0    | 0.54 | 0.55 | 0    |
| 0.12 | 0.04 | 0.02 | 0.21 |

|      |      |      |      |
|------|------|------|------|
| 0    | 0.08 | 0.14 | 0.01 |
| 0.01 | 0    | 0.02 | 0.01 |
|      | 0    | 0.39 | 0    |
|      |      | 0.13 | 0    |
|      |      | 0.12 |      |

Figure 6K

| CON  | SCOP | TGOL | TGOH |
|------|------|------|------|
| 0.47 | 0.07 | 0.17 | 0.17 |
| 0.13 | 0.28 | 1.99 | 0.12 |
| 0.08 | 0.04 | 0.61 | 0.61 |
| 0.28 | 0.11 | 0.05 | 0.25 |
| 0.53 | 0.03 | 0.21 | 0.24 |
| 0.18 | 0.28 | 0.14 | 0.82 |
| 0.12 | 0.19 | 0.17 | 0.76 |
|      | 0.05 | 0.24 | 1.68 |
|      |      | 0.12 | 0.73 |
|      |      | 0.2  |      |

Figure 6L

| CON | SCOP | TGOL | TGOH |
|-----|------|------|------|
| 0.2 | 0    | 0    | 0    |
| 0.3 | 0    | 0    | 0    |
| 0.3 | 0.2  | 0    | 0.2  |
| 0.3 | 0.1  | 0    | 0.1  |
| 0.5 | 0    | 0    | 0    |
| 0   | 0.1  | 0    | 0.2  |
| 0   | 0.6  | 0.7  | 0.3  |
|     | 0.1  | 0.1  | 0.2  |
|     |      | 0    | 0.2  |
|     |      | 0    |      |

Figure 7

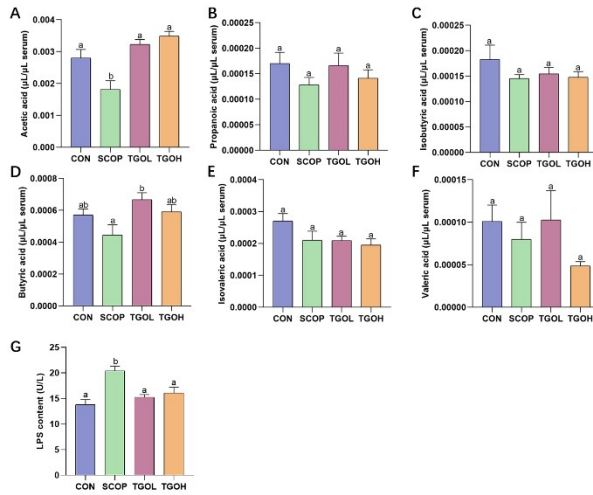

Figure 7A

| CON     | SCOP    | TGOL    | TGOH    |
|---------|---------|---------|---------|
| 0.00254 | 0.002   | 0.00277 | 0.00364 |
| 0.00293 | 0.00188 | 0.00334 | 0.00363 |
| 0.00317 | 0.00131 | 0.00318 | 0.00304 |
| 0.00232 | 0.00238 | 0.00343 | 0.00351 |
| 0.00301 | 0.00255 | 0.00383 | 0.00301 |
| 0.00414 | 0.00074 | 0.00362 | 0.00307 |
| 0.00282 |         | 0.0034  | 0.00411 |
| 0.00145 |         | 0.00324 | 0.0039  |
|         |         | 0.00208 |         |
|         |         | 0.00336 |         |

Figure 7B

| CON     | SCOP    | TGOL    | TGOH    |
|---------|---------|---------|---------|
| 0.00014 | 0.00018 | 0.00033 | 0.00012 |
| 0.00012 | 0.00013 | 0.00016 | 0.00015 |
| 0.00011 | 0.00014 | 0.00015 | 0.00008 |
| 0.00024 | 0.00013 | 0.00012 | 0.00014 |
| 0.00008 | 0.00012 | 0.00014 | 0.00012 |
| 0.00012 | 0.00007 | 0.00017 | 0.00016 |
| 0.00016 |         | 0.00012 | 0.00022 |
| 0.00029 |         | 0.00014 |         |
| 0.00019 |         |         |         |
| 0.00025 |         |         |         |

Figure 7C

| CON | SCOP | TGOL | TGOH |
|-----|------|------|------|
|-----|------|------|------|

|         |         |         |         |
|---------|---------|---------|---------|
| 0.00011 | 0.00016 | 0.00019 | 0.00017 |
| 0.00015 | 0.00016 | 0.00013 | 0.00018 |
| 0.00015 | 0.00014 | 0.00015 | 0.0001  |
| 0.00014 | 0.00016 | 0.00019 | 0.00015 |
| 0.00019 | 0.00014 | 0.00021 | 0.00011 |
| 0.00009 | 0.00011 | 0.00014 | 0.00013 |
| 0.00012 |         | 0.00016 | 0.00019 |
| 0.00036 |         | 0.00009 | 0.00015 |
| 0.00021 |         | 0.00013 |         |
| 0.00031 |         |         |         |

Figure 7D

| CON     | SCOP    | TGOL    | TGOH    |
|---------|---------|---------|---------|
| 0.00052 | 0.00041 | 0.00093 | 0.00067 |
| 0.00069 | 0.00055 | 0.0007  | 0.00068 |
| 0.00073 | 0.0005  | 0.00054 | 0.0004  |
| 0.0005  | 0.00056 | 0.00066 | 0.00057 |
| 0.00065 | 0.00051 | 0.00074 | 0.00045 |
| 0.00047 | 0.00014 | 0.0008  | 0.00054 |
| 0.00046 |         | 0.00062 | 0.00076 |
| 0.00055 |         | 0.00065 | 0.00066 |
|         |         | 0.00044 |         |
|         |         | 0.00059 |         |

Figure 7E

| CON     | SCOP    | TGOL    | TGOH    |
|---------|---------|---------|---------|
| 0.00024 | 0.00022 | 0.00027 | 0.00022 |
| 0.00034 | 0.00023 | 0.0002  | 0.00023 |
| 0.00034 | 0.00024 | 0.00013 | 0.0001  |
| 0.00025 | 0.00026 | 0.00024 | 0.00019 |
| 0.00031 | 0.00024 | 0.00025 | 0.00014 |
| 0.00017 | 0.00007 | 0.00021 | 0.00018 |
| 0.00024 |         | 0.00021 | 0.00027 |
|         |         | 0.00019 | 0.00023 |
|         |         | 0.00018 |         |

Figure 7F

| CON     | SCOP    | TGOL    | TGOH    |
|---------|---------|---------|---------|
| 0.00021 | 0.00007 | 0.00034 | 0.00006 |

|         |         |         |         |
|---------|---------|---------|---------|
| 0.00005 | 0.00017 | 0.00009 | 0.00005 |
| 0.00005 | 0.00012 | 0.00008 | 0.00004 |
| 0.00007 | 0.00007 | 0.00008 | 0.00004 |
| 0.00006 | 0.00006 | 0.00007 | 0.00005 |
| 0.00007 | 0.00007 | 0.00008 | 0.00003 |
| 0.00005 | 0       | 0.00005 | 0.00007 |
| 0.00018 |         | 0.00003 |         |
| 0.00011 |         |         |         |
| 0.00016 |         |         |         |

Figure 7G

| CON      | SCOP     | TGOL     | TGOH     |
|----------|----------|----------|----------|
| 11.71628 | 15.97674 | 11.71628 | 11.71628 |
| 11.71628 | 25.56279 | 18.10698 | 9.586047 |
| 14.91163 | 20.23721 | 18.10698 | 17.04186 |
| 10.65116 | 23.43256 | 17.04186 | 17.04186 |
| 10.65116 | 22.36744 | 15.97674 | 23.43256 |
| 12.7814  | 20.23721 | 14.91163 | 17.04186 |
| 23.43256 | 18.10698 | 17.04186 | 10.65116 |
| 11.71628 | 18.10698 | 11.71628 | 11.71628 |
| 9.586047 | 17.04186 | 15.97674 | 25.56279 |
| 8.52093  | 23.43256 | 14.91163 | 13.84651 |
| 19.17209 | 20.23721 | 14.91163 | 17.04186 |
| 12.7814  |          | 14.91163 | 13.84651 |
| 14.91163 |          | 12.7814  | 21.30233 |
| 10.65116 |          | 14.91163 | 17.04186 |
| 11.71628 |          | 15.97674 | 14.91163 |
| 24.49767 |          |          | 15.97674 |
| 19.17209 |          |          |          |
| 8.52093  |          |          |          |
| 14.91163 |          |          |          |
| 13.84651 |          |          |          |

Figure 8

|    |   |          |         |                                |    |    |   |          |          |
|----|---|----------|---------|--------------------------------|----|----|---|----------|----------|
| 2  | 1 | -0.39738 | 0.56734 | Escape latency1                | 1  | 1  | 2 | -0.39738 |          |
| 3  | 1 | -0.37548 | 0.55149 | NOR index                      | 2  | 2  | 1 | 3        | -0.37548 |
| 4  | 1 | 0.57795  | 0.68421 | Percent of spontaneous         | 3  | 3  | 2 | 3        | 0.27615  |
| 5  | 1 | 0.16889  | 0.36986 | LPS 4                          | 4  | 1  | 4 | 0.57795  |          |
| 6  | 1 | 0.61227  | 0.70423 | g_Streptococcus                | 5  | 5  | 2 | 4        | -0.31007 |
| 7  | 1 | -0.03548 | 0.16952 | g_Anaeroplasma                 | 6  | 6  | 3 | 4        | -0.224   |
| 8  | 1 | 0.10625  | 0.29336 | g_Ruminococcaceae_unclassified | 7  | 7  | 1 | 5        | 0.16889  |
| 9  | 1 | 0.07982  | 0.25428 | g_Allobaculum                  | 8  | 8  | 2 | 5        | -0.06102 |
| 10 | 1 | 0.19938  | 0.40187 | g_Bifidobacterium              | 9  | 9  | 3 | 5        | -0.42932 |
| 11 | 1 | 0.23781  | 0.43889 | g_Olsenella                    | 10 | 10 | 4 | 5        | -0.04035 |

|    |   |          |         |                             |    |    |   |   |          |  |
|----|---|----------|---------|-----------------------------|----|----|---|---|----------|--|
| 12 | 1 | 0.03259  | 0.16247 | g_Parasutterella            | 11 | 11 | 1 | 6 | 0.61227  |  |
| 13 | 1 | 0.01534  | 0.11146 | g_Eubacterium_siraeum_group | 12 | 12 | 2 | 6 | -0.28134 |  |
| 14 | 1 | -0.07739 | 0.25038 | g_Anaerotignum              | 13 | 13 | 3 | 6 | -0.38241 |  |
| 15 | 1 | 0.30035  | 0.49324 | Acetic acid                 | 14 | 14 | 4 | 6 | 0.29617  |  |
| 16 | 1 | -0.00453 | 0.06055 | Propanoic acid              | 15 | 15 | 5 | 6 | 0.40622  |  |
| 17 | 1 | 0.09072  | 0.27108 | Butyric acid                | 16 | 16 | 1 | 7 | -0.03548 |  |
| 18 | 1 | -0.21729 | 0.41953 | SOD                         | 17 | 17 | 2 | 7 | 0.3178   |  |
| 3  | 2 | 0.27615  | 0.47295 | MDA                         | 18 | 18 | 3 | 7 | -0.16035 |  |
| 4  | 2 | -0.31007 | 0.50116 |                             | 4  | 7  |   |   | 0.05895  |  |
| 5  | 2 | -0.06102 | 0.22233 |                             | 5  | 7  |   |   | 0.23588  |  |
| 6  | 2 | -0.28134 | 0.47737 |                             | 6  | 7  |   |   | 0.07509  |  |
| 7  | 2 | 0.3178   | 0.50737 |                             | 1  | 8  |   |   | 0.10625  |  |
| 8  | 2 | 0.45694  | 0.60838 |                             | 2  | 8  |   |   | 0.45694  |  |
| 9  | 2 | 0.33269  | 0.51911 |                             | 3  | 8  |   |   | -0.01559 |  |
| 10 | 2 | 0.41963  | 0.58301 |                             | 4  | 8  |   |   | 0.26382  |  |
| 11 | 2 | 0.28343  | 0.47914 |                             | 5  | 8  |   |   | -0.03852 |  |
| 12 | 2 | 0.31204  | 0.50274 |                             | 6  | 8  |   |   | 0.14292  |  |
| 13 | 2 | 0.36045  | 0.54033 |                             | 7  | 8  |   |   | 0.39545  |  |
| 14 | 2 | 0.45806  | 0.60912 |                             | 1  | 9  |   |   | 0.07982  |  |
| 15 | 2 | -0.07248 | 0.2423  |                             | 2  | 9  |   |   | 0.33269  |  |
| 16 | 2 | 0.4287   | 0.58928 |                             | 3  | 9  |   |   | -0.13283 |  |
| 17 | 2 | 0.2109   | 0.41331 |                             | 4  | 9  |   |   | 0.20708  |  |
| 18 | 2 | 0.25818  | 0.4573  |                             | 5  | 9  |   |   | 0.0044   |  |
| 4  | 3 | -0.224   | 0.42595 |                             | 6  | 9  |   |   | 0.05882  |  |
| 5  | 3 | -0.42932 | 0.5897  |                             | 7  | 9  |   |   | 0.24908  |  |
| 6  | 3 | -0.38241 | 0.55655 |                             | 8  | 9  |   |   | 0.68269  |  |
| 7  | 3 | -0.16035 | 0.3604  |                             | 1  | 10 |   |   | 0.19938  |  |
| 8  | 3 | -0.01559 | 0.11239 |                             | 2  | 10 |   |   | 0.41963  |  |
| 9  | 3 | -0.13283 | 0.32801 |                             | 3  | 10 |   |   | -0.03486 |  |
| 10 | 3 | -0.03486 | 0.16804 |                             | 4  | 10 |   |   | 0.36681  |  |
| 11 | 3 | -0.16072 | 0.36081 |                             | 5  | 10 |   |   | 0.15737  |  |
| 12 | 3 | -0.21596 | 0.41825 |                             | 6  | 10 |   |   | 0.11077  |  |
| 13 | 3 | -0.02752 | 0.1493  |                             | 7  | 10 |   |   | 0.62362  |  |
| 14 | 3 | 0.04603  | 0.1931  |                             | 8  | 10 |   |   | 0.64857  |  |
| 15 | 3 | 0.04385  | 0.18846 |                             | 9  | 10 |   |   | 0.47029  |  |
| 16 | 3 | 0.06887  | 0.23619 |                             | 1  | 11 |   |   | 0.23781  |  |
| 17 | 3 | -0.0842  | 0.26116 |                             | 2  | 11 |   |   | 0.28343  |  |
| 18 | 3 | 0.11215  | 0.3014  |                             | 3  | 11 |   |   | -0.16072 |  |
| 5  | 4 | -0.04035 | 0.18078 |                             | 4  | 11 |   |   | 0.21555  |  |
| 6  | 4 | 0.29617  | 0.48979 |                             | 5  | 11 |   |   | 0.06713  |  |
| 7  | 4 | 0.05895  | 0.21852 |                             | 6  | 11 |   |   | 0.27075  |  |
| 8  | 4 | 0.26382  | 0.46227 |                             | 7  | 11 |   |   | 0.52091  |  |
| 9  | 4 | 0.20708  | 0.40955 |                             | 8  | 11 |   |   | 0.5066   |  |
| 10 | 4 | 0.36681  | 0.54508 |                             | 9  | 11 |   |   | 0.30888  |  |

|    |   |            |         |    |    |            |
|----|---|------------|---------|----|----|------------|
| 11 | 4 | 0.21555    | 0.41785 | 10 | 11 | 0.74615    |
| 12 | 4 | 0.22048    | 0.4226  | 1  | 12 | 0.03259    |
| 13 | 4 | 0.04237    | 0.18526 | 2  | 12 | 0.31204    |
| 14 | 4 | -0.06759   | 0.23398 | 3  | 12 | -0.21596   |
| 15 | 4 | 0.08086    | 0.25593 | 4  | 12 | 0.22048    |
| 16 | 4 | -0.08776   | 0.26662 | 5  | 12 | 0.12773    |
| 17 | 4 | -0.07691   | 0.24959 | 6  | 12 | 0.23729    |
| 18 | 4 | -0.21314   | 0.4155  | 7  | 12 | 0.51905    |
| 6  | 5 | 0.40622    | 0.57362 | 8  | 12 | 0.62885    |
| 7  | 5 | 0.23588    | 0.4371  | 9  | 12 | 0.37376    |
| 8  | 5 | -0.03852   | 0.17663 | 10 | 12 | 0.44733    |
| 9  | 5 | 0.0044     | 0.05971 | 11 | 12 | 0.33069    |
| 10 | 5 | 0.15737    | 0.35703 | 1  | 13 | 0.01534    |
| 11 | 5 | 0.06713    | 0.23319 | 2  | 13 | 0.36045    |
| 12 | 5 | 0.12773    | 0.32165 | 3  | 13 | -0.02752   |
| 13 | 5 | 0.16948    | 0.37051 | 4  | 13 | 0.04237    |
| 14 | 5 | -0.21819   | 0.4204  | 5  | 13 | 0.16948    |
| 15 | 5 | 3.67614E-4 | 0.01726 | 6  | 13 | 0.14782    |
| 16 | 5 | -0.30714   | 0.49878 | 7  | 13 | 0.35437    |
| 17 | 5 | -0.19312   | 0.39551 | 8  | 13 | 0.48716    |
| 18 | 5 | -0.36461   | 0.54344 | 9  | 13 | 0.30814    |
| 7  | 6 | 0.07509    | 0.24662 | 10 | 13 | 0.42296    |
| 8  | 6 | 0.14292    | 0.34025 | 11 | 13 | 0.32318    |
| 9  | 6 | 0.05882    | 0.21827 | 12 | 13 | 0.24862    |
| 10 | 6 | 0.11077    | 0.29954 | 1  | 14 | -0.07739   |
| 11 | 6 | 0.27075    | 0.4683  | 2  | 14 | 0.45806    |
| 12 | 6 | 0.23729    | 0.43842 | 3  | 14 | 0.04603    |
| 13 | 6 | 0.14782    | 0.34603 | 4  | 14 | -0.06759   |
| 14 | 6 | -0.10309   | 0.28896 | 5  | 14 | -0.21819   |
| 15 | 6 | 0.38144    | 0.55585 | 6  | 14 | -0.10309   |
| 16 | 6 | -0.20021   | 0.40271 | 7  | 14 | 0.18922    |
| 17 | 6 | -0.00559   | 0.06727 | 8  | 14 | 0.46315    |
| 18 | 6 | -0.25385   | 0.45345 | 9  | 14 | 0.49505    |
| 8  | 7 | 0.39545    | 0.56596 | 10 | 14 | 0.3513     |
| 9  | 7 | 0.24908    | 0.44917 | 11 | 14 | 0.44884    |
| 10 | 7 | 0.62362    | 0.71073 | 12 | 14 | 0.06504    |
| 11 | 7 | 0.52091    | 0.64957 | 13 | 14 | 0.35717    |
| 12 | 7 | 0.51905    | 0.64841 | 1  | 15 | 0.30035    |
| 13 | 7 | 0.35437    | 0.53576 | 2  | 15 | -0.07248   |
| 14 | 7 | 0.18922    | 0.39149 | 3  | 15 | 0.04385    |
| 15 | 7 | -0.11451   | 0.30456 | 4  | 15 | 0.08086    |
| 16 | 7 | 0.06876    | 0.236   | 5  | 15 | 3.67614E-4 |
| 17 | 7 | 0.10069    | 0.28558 | 6  | 15 | 0.38144    |
| 18 | 7 | 0.07009    | 0.23827 | 7  | 15 | -0.11451   |



|    |    |          |         |    |    |          |
|----|----|----------|---------|----|----|----------|
| 9  | 8  | 0.68269  | 0.74362 | 8  | 15 | 0.23582  |
| 10 | 8  | 0.64857  | 0.7248  | 9  | 15 | 0.32938  |
| 11 | 8  | 0.5066   | 0.64058 | 10 | 15 | -0.14705 |
| 12 | 8  | 0.62885  | 0.7137  | 11 | 15 | -0.09264 |
| 13 | 8  | 0.48716  | 0.62817 | 12 | 15 | 0.09503  |
| 14 | 8  | 0.46315  | 0.61249 | 13 | 15 | 0.14888  |
| 15 | 8  | 0.23582  | 0.43706 | 14 | 15 | 0.10602  |
| 16 | 8  | 0.24296  | 0.44362 | 1  | 16 | -0.00453 |
| 17 | 8  | 0.29968  | 0.49269 | 2  | 16 | 0.4287   |
| 18 | 8  | 0.00607  | 0.07012 | 3  | 16 | 0.06887  |
| 10 | 9  | 0.47029  | 0.6172  | 4  | 16 | -0.08776 |
| 11 | 9  | 0.30888  | 0.50019 | 5  | 16 | -0.30714 |
| 12 | 9  | 0.37376  | 0.55023 | 6  | 16 | -0.20021 |
| 13 | 9  | 0.30814  | 0.4996  | 7  | 16 | 0.06876  |
| 14 | 9  | 0.49505  | 0.63324 | 8  | 16 | 0.24296  |
| 15 | 9  | 0.32938  | 0.51653 | 9  | 16 | 0.33501  |
| 16 | 9  | 0.33501  | 0.52092 | 10 | 16 | 0.13148  |
| 17 | 9  | 0.25878  | 0.45783 | 11 | 16 | 0.16723  |
| 18 | 9  | 0.12325  | 0.31597 | 12 | 16 | 0.16133  |
| 11 | 10 | 0.74615  | 0.77742 | 13 | 16 | -0.03796 |
| 12 | 10 | 0.44733  | 0.60195 | 14 | 16 | 0.48538  |
| 13 | 10 | 0.42296  | 0.58532 | 15 | 16 | 0.33627  |
| 14 | 10 | 0.3513   | 0.53344 | 1  | 17 | 0.09072  |
| 15 | 10 | -0.14705 | 0.34512 | 2  | 17 | 0.2109   |
| 16 | 10 | 0.13148  | 0.32634 | 3  | 17 | -0.0842  |
| 17 | 10 | 0.30023  | 0.49314 | 4  | 17 | -0.07691 |
| 18 | 10 | -0.09731 | 0.28076 | 5  | 17 | -0.19312 |
| 12 | 11 | 0.33069  | 0.51755 | 6  | 17 | -0.00559 |
| 13 | 11 | 0.32318  | 0.51164 | 7  | 17 | 0.10069  |
| 14 | 11 | 0.44884  | 0.60296 | 8  | 17 | 0.29968  |
| 15 | 11 | -0.09264 | 0.27393 | 9  | 17 | 0.25878  |
| 16 | 11 | 0.16723  | 0.36805 | 10 | 17 | 0.30023  |
| 17 | 11 | 0.37341  | 0.54996 | 11 | 17 | 0.37341  |
| 18 | 11 | 0.00846  | 0.08279 | 12 | 17 | 0.06377  |
| 13 | 12 | 0.24862  | 0.44876 | 13 | 17 | 0.26208  |
| 14 | 12 | 0.06504  | 0.22953 | 14 | 17 | 0.37437  |
| 15 | 12 | 0.09503  | 0.27744 | 15 | 17 | 0.08271  |
| 16 | 12 | 0.16133  | 0.36149 | 16 | 17 | 0.21571  |
| 17 | 12 | 0.06377  | 0.22727 | 1  | 18 | -0.21729 |
| 18 | 12 | 0.14424  | 0.34181 | 2  | 18 | 0.25818  |
| 14 | 13 | 0.35717  | 0.53787 | 3  | 18 | 0.11215  |
| 15 | 13 | 0.14888  | 0.34727 | 4  | 18 | -0.21314 |
| 16 | 13 | -0.03796 | 0.17534 | 5  | 18 | -0.36461 |
| 17 | 13 | 0.26208  | 0.46075 | 6  | 18 | -0.25385 |

|    |    |          |         |    |    |          |
|----|----|----------|---------|----|----|----------|
| 18 | 13 | -0.13705 | 0.33318 | 7  | 18 | 0.07009  |
| 15 | 14 | 0.10602  | 0.29304 | 8  | 18 | 0.00607  |
| 16 | 14 | 0.48538  | 0.62702 | 9  | 18 | 0.12325  |
| 17 | 14 | 0.37437  | 0.55067 | 10 | 18 | -0.09731 |
| 18 | 14 | 0.31685  | 0.5066  | 11 | 18 | 0.00846  |
| 16 | 15 | 0.33627  | 0.5219  | 12 | 18 | 0.14424  |
| 17 | 15 | 0.08271  | 0.25883 | 13 | 18 | -0.13705 |
| 18 | 15 | 0.0153   | 0.11133 | 14 | 18 | 0.31685  |
| 17 | 16 | 0.21571  | 0.418   | 15 | 18 | 0.0153   |
| 18 | 16 | 0.29756  | 0.49095 | 16 | 18 | 0.29756  |
| 18 | 17 | 0.32374  | 0.51208 | 17 | 18 | 0.32374  |

Figure S1

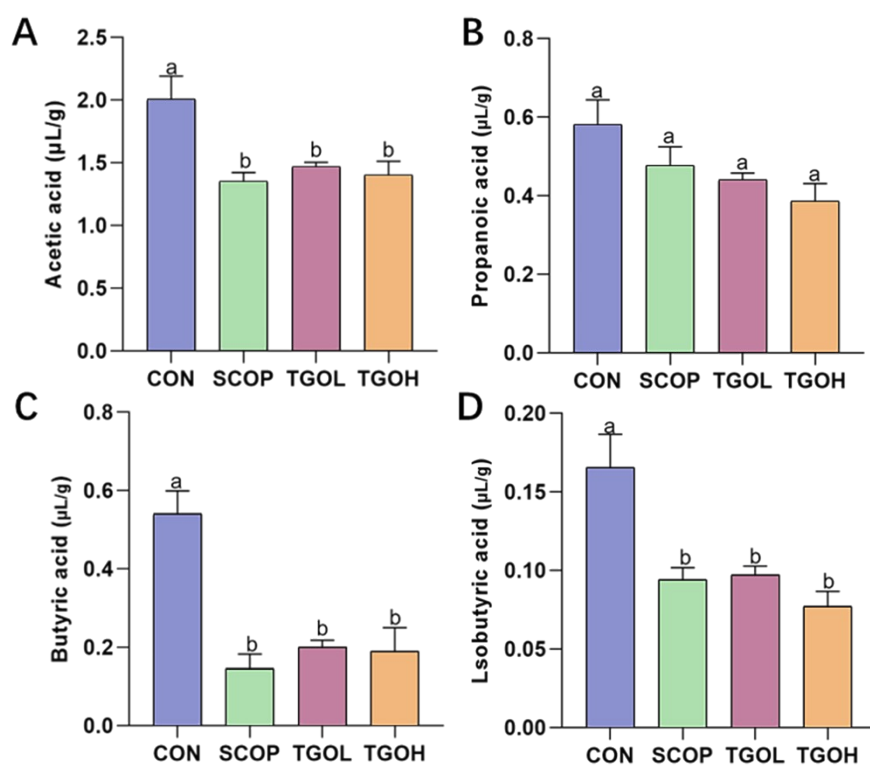

Figure S1A

| CON      | SCOP     | TGOL     | TGOH     |
|----------|----------|----------|----------|
| 2.850109 | 1.164133 | 1.556651 | 1.139734 |
| 2.067678 | 1.136468 | 1.539215 | 1.612691 |
| 1.717216 | 1.418147 | 1.373256 | 1.19447  |
| 1.546152 | 1.355574 | 1.443759 | 1.262006 |
| 1.894202 | 1.53045  | 1.535066 | 1.820838 |
| 1.960452 | 1.511305 | 1.354704 | 1.390458 |

Figure S1B

| CON      | SCOP     | TGOL     | TGOH    |
|----------|----------|----------|---------|
| 0.931095 | 0.488083 | 0.484293 | 0.33038 |

|          |          |          |          |
|----------|----------|----------|----------|
| 0.61256  | 0.269959 | 0.417145 | 0.31491  |
| 0.500346 | 0.568189 | 0.490957 | 0.341572 |
| 0.567644 | 0.600743 | 0.442184 | 0.307882 |
| 0.397379 | 0.438574 | 0.378655 | 0.592493 |
| 0.489232 | 0.492265 | 0.429658 | 0.429293 |
| 0.385059 |          |          |          |
| 0.932743 |          |          |          |
| 0.450618 |          |          |          |
| 0.54594  |          |          |          |

Figure S1C

| CON      | SCOP     | TGOL     | TGOH     |
|----------|----------|----------|----------|
| 0.58064  | 0.125218 | 0.190978 | 0.123145 |
| 0.426549 | 0.008521 | 0.178535 | 0.095264 |
| 0.46086  | 0.250475 | 0.255401 | 0.066771 |
| 0.380795 | 0.210564 | 0.18917  | 0.140689 |
| 0.760163 | 0.088918 | 0.244324 | 0.457206 |
| 0.632432 | 0.192262 | 0.146707 | 0.257922 |

Figure S1D

| CON      | SCOP     | TGOL     | TGOH     |
|----------|----------|----------|----------|
| 0.243622 | 0.069952 | 0.113391 | 0.120842 |
| 0.202574 | 0.127475 | 0.105675 | 0.083879 |
| 0.115353 | 0.085454 | 0.102573 | 0.060879 |
| 0.139746 | 0.093756 | 0.090273 | 0.066353 |
| 0.176553 | 0.092074 | 0.075044 | 0.06161  |
| 0.115588 | 0.095516 | 0.09696  | 0.06981  |
