# Supplementary material for: Torreya grandis oil attenuates cognitive impairment in scopolamine-induced mice
Source: Royal Society of Chemistry journal article supplement (doi:10.1039/d3fo03800a), 2023-01-01
Supplement: d3fo03800a4.pdf [file d3fo03800a4.pdf]

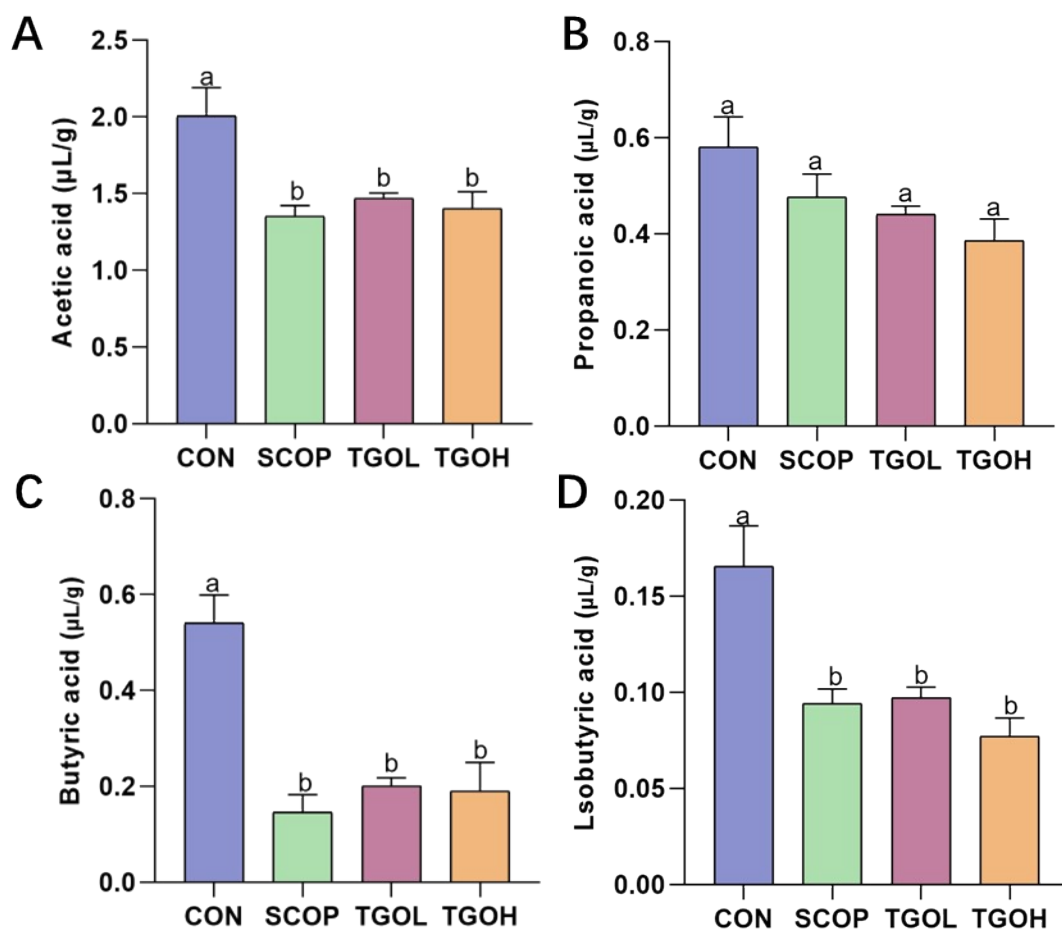

Figure S1. Effects of TGO on SCFAs in faeces. (A) Acetic acid; (B) Propanoic acid; (C) Isobutyric acid; (D) Butyric acid;. The data is presented as mean  $\pm$  SEM,  $n \geq 6$ . Means with different letters (a, b, c) indicate significant differences from each other ( $p < 0.05$ ).
