# Supplementary figures and images for: Torreya grandis oil attenuates cognitive impairment in scopolamine-induced mice
Source: Royal Society of Chemistry journal article supplement (doi:10.1039/d3fo03800a), 2023-01-01

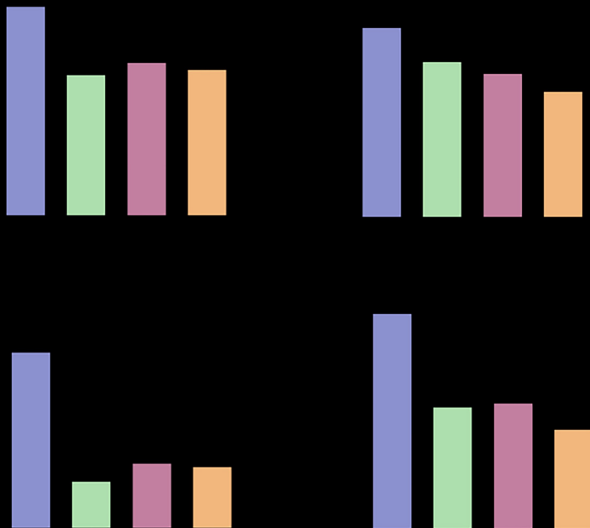

Supplement: d3fo03800a2.pdf [file d3fo03800a2.pdf]
